# Supplementary material for: Plasma Lipidomics Profiling to Identify the Biomarkers of Diagnosis and Radiotherapy Response for Advanced Non-Small-Cell Lung Cancer Patients
Source: J Lipids. 2024 Jan 27;2024:6730504. doi: 10.1155/2024/6730504 (PMC10838201; doi:10.1155/2024/6730504)
Supplement: Supplementary Materials — The original data for all analyses in this manuscript are provided in the supplementary document, according to the corresponding subgroups. The corresponding subgroups can be obtained according to the supplementary file name. [file 6730504.f1.zip]

Archive with 13 entries (13 files):
- good vs bad response post-RT group.txt
- good vs bad response pre-RT group.txt
- good vs bad response RT group.txt
- Lipid (Control vs. lung cancer patients after radiotherapy).txt
- Lipid (Control vs. lung cancer patients before radiotherapy).txt
- Lipid (Control vs. lung cancer patients before, during and after radiotherapy).txt
- Lipid (Control vs. lung cancer patients during radiotherapy).txt
- Lipid (during radiotherapy vs. after radiotherapy for lung cancer patients ).txt
- Lipid (pre-radiotherapy vs. during radiotherapy for Lung cancer patients ).txt
- Lipid (pre-radiotherapy vs. post-radiotherapy for lung cancer patients).txt
- Squamous cell carcinoma vs. adenocarcinoma patients in post-RT group.txt
- Squamous cell carcinoma vs. adenocarcinoma patients in pre-RT group.txt
- Squamous cell carcinoma vs. adenocarcinoma patients in RT group.txt
