# Supplementary material for: Plasma Lipidomics Profiling to Identify the Biomarkers of Diagnosis and Radiotherapy Response for Advanced Non-Small-Cell Lung Cancer Patients
Source: J Lipids. 2024 Jan 27;2024:6730504. doi: 10.1155/2024/6730504 (PMC10838201; doi:10.1155/2024/6730504)
Supplement: Supplementary Materials — The original data for all analyses in this manuscript are provided in the supplementary document, according to the corresponding subgroups. The corresponding subgroups can be obtained according to the supplementary file name. [file 6730504.f1.zip › good vs bad response post-RT group.txt]

Sample	88	89	92	93	96	99	103	105	106	107	108	112	113	116	117	118	90	91	94	95	97	98	100	101	102	104	109	110	111	114	115
Group	good response	good response	good response	good response	good response	good response	good response	good response	good response	good response	good response	good response	good response	good response	good response	good response	bad response	bad response	bad response	bad response	bad response	bad response	bad response	bad response	bad response	bad response	bad response	bad response	bad response	bad response	bad response
FFA(14:0)	595946.5958	799922.0098	1128901.702	960814.3752	1003379.213	588002.783	977033.1473	2214568.412	0	531092.1051	195507.2554	2218357.61	129488.457	0	0	0	1832732.065	279640.073	354360.1945	773078.764	499152.4513	974904.6414	883801.0207	992552.9066	860496.7804	1749475.611	211661.9699	596165.1465	727322.4857	804157.8437	684723.4305
FFA(14:1)	1094704.097	334924.258	658599.4129	535618.7917	835892.5059	745366.0168	1109414.245	852857.8649	0	924169.5561	740740.8646	476170.3296	629065.5958	0	0	0	908028.8736	700042.979	705151.7776	511970.0412	575133.0902	633843.6382	567230.6261	764805.1373	475881.3601	842697.0886	345630.8977	528089.5286	403704.3004	759959.3847	448475.7926
FFA(16:0)	9760565.815	18350000.88	14097203.13	17650488.47	17563255.21	5188461.216	27606755.92	20843258.46	0	9458884.121	4467952.07	31559711.04	6432881.558	0	0	0	15713334.42	3263904.108	5455683.725	5909197.872	11507360.48	3976837.357	7081226.142	7194479.11	2434845.563	19271944.94	6459643.577	10929759.19	8800190.604	18997520.99	5852240.114
FFA(16:1)	824612.2092	1897199.985	1024454.285	1336917.171	2148245.775	147099.9839	5971841.754	2295049.672	0	1560205.335	226035.3994	10024621.28	1066554.025	0	0	0	2618311.947	204522.7068	533968.2756	1367731.913	1803287.831	110844.1254	755509.9842	597395.2092	149373.4151	2949344.597	497652.604	1864376.839	1795583.142	3550715.196	238885.914
FFA(16:2)	353192.5079	275319.965	313228.0653	91168.04808	207102.4722	168808.5484	305237.1876	393919.7765	0	410102.1567	290696.3197	289337.6267	305490.3772	0	0	0	318746.8771	158704.2921	199711.2248	355651.2217	309118.2871	356711.4855	297787.7301	320449.7134	205799.2584	247436.1075	448495.3929	224282.8879	252652.8842	291956.1738	286265.5777
FFA(18:0)	8508309.254	14810174.47	11466408.88	9005827.021	8760158.212	7515761.532	14950628.71	9223929.708	0	7432202.195	6390949.927	14104912.58	6916397.586	0	0	0	9291999.728	4436605.626	7313838.54	7598431.7	12916760.66	2721604.48	10579859.66	5462561.815	3994620.526	8633694.547	7905887.123	7998003.651	4983515.43	13119822.85	4434224.997
FFA(18:1)	28181619.28	50742382.08	35740391.5	41836731.94	36198613.05	8943245.126	80592365.7	26293838.52	0	23113003.84	8648024.612	66901629.79	26676613.25	0	0	0	31631646.72	6929136.918	14292711.73	19954127.96	35873167.65	5659501.808	28826323.54	22138819.08	4375036.066	29064890.67	17548067.49	31828253.21	23181955.08	54747902.85	6585303.599
FFA(18:2)	17331095.38	32272802.62	22432287.59	21827249.06	22449520.14	8324277.413	64472745.3	15710833.3	0	12222849.73	4974593.222	48532199.06	14457380.17	0	0	0	16193625.43	3516451.328	7584885.717	9482319.078	20672426.68	4210642.106	14067929.3	10296794.85	3415465.952	17832252.07	11701148.07	18471031.49	14455597.9	36872294.92	5569417.817
FFA(18:3)	850750.6074	1226116.676	1555187.099	1051755.624	1254751.021	558181.1426	2902333.603	953053.4252	0	766306.6422	269778.2645	2907899.548	764090.4604	0	0	0	986810.4151	271961.4699	486902.022	582461.0227	1705288.082	268566.0856	528846.7534	445720.472	123901.1555	1412248.482	921373.3549	761063.7234	862604.0044	3188486.529	697320.9609
FFA(20:0)	976926.6607	3133730.241	2217816.196	1918227.301	2545933.119	3153918.155	2423934.659	934503.3445	0	536346.3026	937190.8824	3243924.732	1037034.99	0	0	0	3482030.473	2300633.607	3223948.69	2428434.062	2563881.115	930744.0527	2115806.03	1973966.918	2103444.449	1104642.234	368350.4227	5849225.96	1131674.799	8461763.851	1017536.59
FFA(20:1)	1136651.584	1114086.087	741111.4313	1075856.782	543160.7368	246454.5017	3369954.844	463577.8201	0	365378.9808	136578.5854	1674125.191	590868.3964	0	0	0	878264.8291	149734.0486	271983.4266	318351.1265	918691.0782	320364.1927	1634312.173	382237.8198	277413.1789	559946.8731	279034.6499	557332.5013	371177.0957	2341788.643	737915.9577
FFA(20:2)	675874.1089	889162.4958	537442.0947	727633.5448	556822.2864	252275.1986	2469882.556	399669.3981	0	340385.2577	158487.5095	1341888.957	462261.3811	0	0	0	466669.7918	155287.1483	270998.666	405370.5142	778337.6858	82762.33302	428397.2193	272484.5439	105726.1013	365896.3887	323174.3751	516563.4044	375890.377	818695.1508	121695.9381
FFA(20:3)	1685287.491	662188.3944	321420.6349	485543.8106	590448.1574	755298.0496	2687740.856	375844.1259	0	491167.5027	645138.0399	1661572.168	645788.3682	0	0	0	362220.5374	539124.3593	584759.0662	517917.5332	597669.4338	462588.5956	636666.4829	471873.5626	420277.7562	396351.8303	723887.0701	433209.8501	426190.3129	1056151.616	103968.5318
FFA(20:4)	2719777.05	1159634.451	817592.7493	1101707.435	1787022.196	518544.7999	4022545.541	1316612.619	0	860814.1629	396445.076	3013633.355	938350.6938	0	0	0	954442.9079	233565.3389	243119.1266	1417885.744	944235.2156	350713.8782	968270.4391	553762.7464	266152.2887	971502.2386	901256.8589	1040179.293	1043269.238	1150813.078	393279.2543
FFA(20:5)	169628.3325	500411.0071	254453.6712	163404.5909	221879.7226	614918.0672	216788.8256	131869.9085	0	380279.7177	486143.6354	446148.2454	431781.2772	0	0	0	322711.0974	318526.6993	265705.8442	496756.2677	567085.0644	313255.953	586261.2334	198287.2031	292927.7868	202333.6238	235843.4073	319237.7897	284396.1064	746749.2802	161256.5229
FFA(22:4)	1244966.683	691361.7201	478473.1796	528357.8951	595150.9549	230187.618	2730071.736	265886.5065	0	218955.4338	94271.51695	1113808.114	300805.3442	0	0	0	358388.2778	153779.685	197465.338	441145.767	536358.329	83828.99631	390614.6282	232523.8051	90846.36735	260184.2227	222311.051	418883.5695	328527.2808	501726.8438	69189.30171
FFA(22:5)	1002171.326	600437.598	388168.2445	442207.0282	672103.0173	167586.8246	3050917.292	218126.9055	0	313476.5758	95438.75901	828967.363	187826.7582	0	0	0	355836.8705	51466.16512	157958.3166	388150.5772	493624.0495	123241.6827	260628.2284	213634.3326	91298.25156	269608.2856	228614.8748	268643.9269	266332.6842	641443.2729	67300.03585
FFA(22:6)	687081.1375	532527.3686	283312.5182	321031.7928	602860.3025	183288.6738	1327716.255	256595.8614	0	498945.2847	132783.7475	804337.808	179111.2169	0	0	0	504443.746	75633.64065	274625.3545	344995.7256	546100.3184	27259.64055	240949.2991	321446.2207	20675.4155	250419.2557	324298.7198	220495.5391	236065.4124	608793.2024	98795.87095
FFA(24:0)	15901240.94	5275749.753	9041591.156	331945.4159	6979997.34	3095132.662	1262394.636	13180090.71	0	1687376.553	613871.0888	23776584.21	1344657.671	0	0	0	15137050.22	3046241.502	997749.0283	4971323.098	1701939.814	17086436.08	9547286.384	3062811.333	1543686.092	1734759.052	17282071	26213702.89	1829269.235	2387052.075	6706977.255
FFA(24:1)	1132531.284	435448.5981	562019.0158	274604.7459	165105.5591	401349.9811	1476302.081	94317.66881	0	151771.7739	49940.18118	355271.5948	229226.8652	0	0	0	393639.8126	532581.203	300252.392	221932.2935	579603.5961	152692.8018	1239998.147	199537.4406	115951.1137	120007.4803	166796.5712	239677.965	201447.5829	833210.6281	69588.03339
LPA(14:0)	0	0	0	0	0	0	0	0	0	0	0	0	0	0	0	0	0	0	0	0	0	0	0	0	0	0	0	0	0	0	0
LPA(16:0)	4445.065491	0	2184.271828	1494.985955	3427.067676	3078.65329	2536.557804	2148.903502	966.9356484	0	1603.403903	1208.532775	0	0	0	861.02849	2886.831953	2624.297796	2989.470928	0	2365.500782	1176.333705	1628.424293	1357.203424	0	1499.217098	0	0	1332.70405	1267.162577	3192.747716
LPA(16:1)	0	0	0	0	0	0	0	0	0	0	0	0	0	0	0	0	0	0	0	0	0	0	0	0	0	0	0	0	0	0	0
LPA(18:0)	0	0	618.5256517	0	822.4622655	0	0	1190.586849	0	682.2617657	481.1826988	0	0	1073.203909	0	0	1234.419791	0	0	0	519.4497988	0	0	925.7632247	408.6935508	0	0	0	0	1035.810066	1094.921219
LPA(18:1)	0	0	0	0	608.6228891	0	638.421802	0	0	0	0	0	0	0	0	0	923.922105	0	0	0	0	0	0	518.2368869	0	364.956887	0	0	618.3680267	0	0
LPA(18:2)	0	0	0	0	0	0	0	0	0	0	373.4883076	0	0	0	0	0	0	495.4181133	992.0513724	0	0	0	0	0	0	0	0	0	0	0	0
LPA(18:3)	0	0	0	0	0	0	0	0	0	0	0	0	0	0	0	0	0	0	519.1821678	0	0	0	0	0	0	0	0	0	0	0	0
LPA(20:0)	0	0	313.5795	0	0	0	0	0	0	0	0	0	0	0	0	0	0	0	0	0	0	0	0	0	0	0	0	0	0	0	0
LPA(20:1)	0	0	0	0	0	0	0	0	0	0	0	0	0	0	0	0	0	0	0	0	0	0	0	0	0	0	0	0	0	0	0
LPA(20:2)	0	0	0	0	0	0	0	0	0	0	0	0	411.1799553	0	0	0	0	0	313.5878789	0	0	0	0	0	0	0	0	0	0	0	0
LPA(20:3)	0	0	0	0	0	0	0	0	0	0	0	0	0	0	0	0	0	0	0	0	0	0	0	0	0	0	0	0	0	0	0
LPA(20:4)	0	414.5283621	0	0	0	405.3089517	0	0	0	0	515.859662	0	507.7607534	495.1287263	0	0	0	0	0	410.4578205	0	405.0230564	519.1471845	0	0	0	0	0	0	0	0
LPA(20:5)	0	0	0	0	0	0	0	0	0	0	0	0	0	0	396.470016	0	0	0	0	0	0	0	0	0	0	0	0	0	0	418.106	0
LPG(14:0)	0	355.5431269	0	378.0196918	352.4176891	376.2654458	335.7735296	475.7264557	179.6625078	0	0	0	0	453.188486	554.7228807	458.9197683	501.2349221	0	0	371.4584515	0	0	0	0	0	349.8805006	538.8884412	0	621.125714	0	0
LPG(16:0)	1031.374205	1470.128682	1063.967077	3190.493473	2022.548036	2189.67826	1634.874944	2350.868026	5518.429697	4139.434185	1668.56551	1378.859256	1308.797926	4349.989992	8750.663946	4096.917628	1517.676093	2807.622051	1662.261678	3066.471463	3483.834186	1836.800515	721.0632989	1842.160395	843.1908013	3144.107908	1149.875314	2370.658849	673.6134369	828.6712287	5434.81377
LPG(16:1)	0	272.7698263	424.5955937	1057.780776	875.8155833	363.3525974	280.3249682	261.2279585	591.9512435	994.1080215	282.7280512	220.4579429	551.5084001	0	1073.957386	904.5615428	391.8451236	278.8871631	628.250487	302.1589463	247.3571283	237.8952813	337.6645034	796.4460257	559.3391574	427.8885914	167.8238437	311.6979177	258.9781151	342.1591604	811.5450307
LPG(18:0)	2791.273265	3881.793114	4290.05328	9608.725024	4547.432325	7021.268708	2403.875294	3015.097591	2162.464979	6103.483051	2229.813597	3535.881152	4812.459856	2786.94227	5287.383918	4904.214138	5346.641508	4895.792599	4734.305703	3953.706228	4214.003669	7821.648948	4502.684234	3307.692353	3556.253546	2580.608597	2883.25508	1613.706961	3444.027452	2338.990308	6648.348362
LPG(18:1)	12316.24483	20366.53092	15961.28135	34354.15507	28492.11211	17302.97034	25958.92457	7806.191891	23608.64699	21921.62727	11789.11618	27992.60135	11945.78856	12760.40455	7044.199916	23966.34466	16410.46309	14693.06363	9498.329314	25204.35317	20439.88373	24136.0616	10128.4778	13688.04529	15305.29294	16320.10571	7715.63725	8480.630805	11227.52382	19978.75275	8543.738799
LPG(18:2)	5637.700969	11310.10886	9475.736783	4103.511351	9671.74927	18043.56362	4884.999778	2336.969084	7789.54042	9574.467948	8279.585863	10121.92159	3447.480003	7500.452505	6368.303071	15547.3433	10581.20896	5066.247815	4554.23377	11508.75662	10170.33145	10311.06888	3298.77871	8847.233018	6951.681525	5883.644395	2380.603877	4893.627976	6336.299971	5798.236899	3964.886072
LPG(18:3)	801.1554739	249.4164912	646.0805555	238.5864035	489.2863446	1826.843022	637.2243612	828.9951832	1682.542037	505.3256162	247.7534628	0	507.1963562	246.3446016	771.703233	460.7406999	1075.240643	1027.691556	546.1494094	861.9399935	2276.410317	1683.893817	485.4639752	430.4501607	409.7125589	559.891598	339.3509724	198.6352482	440.9834062	0	1364.66145
LPG(20:0)	0	0	0	0	276.4567122	0	0	307.3885883	382.051788	0	0	0	415.8464853	598.1509319	0	431.1847352	283.1624127	706.7034162	0	286.1445727	500.1688421	414.8802468	0	171.1230398	285.1664876	0	0	0	0	0	412.7852274
LPG(20:1)	0	0	0	0	1043.906255	0	0	0	1214.160132	1047.539612	0	0	0	1010.136102	311.1188619	1286.226573	0	0	0	0	0	0	0	983.2675592	0	0	0	0	0	0	0
LPG(20:2)	1575.182365	860.2697924	939.947037	1057.745036	1404.270105	1434.397192	845.9723811	2184.884019	1307.134081	937.6893851	606.4193122	849.5498419	561.9021149	0	1117.926434	1066.903466	1122.949482	590.4118902	0	0	1801.828843	1206.29178	1278.668617	910.8251862	1273.542997	0	1237.154126	533.8525366	548.5777536	436.6670787	944.2814323
LPG(20:3)	505.9806914	366.8410145	844.6500961	508.2525383	245.9429002	763.4683892	625.8953736	291.546461	0	1107.190721	0	0	0	352.4369385	502.0563678	444.9142357	835.4344636	282.4826337	0	973.9891433	594.340261	810.9383602	0	791.9640738	0	268.5212019	389.7460777	423.9676687	1253.872179	426.4430842	1255.635523
LPG(20:4)	513.3991934	611.537038	675.6236462	774.244489	1100.108338	627.8665199	354.6000639	782.567232	1558.597054	373.3936614	270.6713742	695.2255817	647.5389275	0	555.2703855	674.0197614	365.8114215	453.9143147	0	609.4478422	1113.920679	826.2025499	713.2215847	1365.631947	320.6003931	450.8271552	0	261.7035696	0	327.6334701	247.7982586
LPG(20:5)	0	0	805.2282497	634.0106911	0	591.3200117	622.4886979	0	981.0337509	391.6014332	152.9001686	502.3405947	905.296089	295.9809218	967.7619971	943.0979646	320.407622	490.9134501	571.4524172	658.5345042	481.8755806	329.333832	642.721316	435.3787761	713.2799188	692.4439228	254.4115217	149.0422885	0	628.8093909	406.9704565
LPG(22:4)	918.4372512	0	472.5643249	0	748.2461468	620.8093658	456.449808	284.6242086	928.9182998	1199.717094	225.6354232	376.7653051	0	647.1729222	252.2489785	351.9325117	532.5020209	580.6272795	222.5000302	406.4704757	320.2738422	383.3872182	547.1264717	872.9329774	211.5448531	1364.613929	0	0	469.6063656	0	0
LPG(22:5)	285.5792261	0	368.0999959	1294.47663	911.4132431	1650.388364	378.1668308	288.4840104	0	0	376.7344784	0	0	840.3488553	1059.352797	604.4037498	709.3656685	1331.529964	0	801.5450858	752.2510853	664.829931	522.8336846	620.7270756	669.3847401	553.4169061	431.8450949	0	0	0	401.4040803
LPG(22:6)	584.6850452	0	512.8731467	775.6149044	380.3789931	595.6567452	606.3908515	0	468.2545972	371.1653455	583.6449222	0	0	0	0	698.7248886	0	582.6507276	622.6765531	637.1857019	2192.238391	0	0	647.0384836	515.5999839	350.9216861	273.02081	516.3992925	0	0	364.03942
LPI(14:0)	0	0	0	0	0	0	0	0	0	0	0	0	0	0	0	0	0	0	0	0	0	0	0	0	0	0	0	0	0	0	0
LPI(16:0)	0	0	0	0	0	0	0	884.2537106	1565.926089	0	0	0	0	1041.299019	671.7654569	1323.966145	0	0	0	0	0	0	0	0	0	730.1783446	0	0	0	0	1634.297923
LPI(16:1)	0	0	0	0	0	0	0	0	0	0	0	0	0	0	0	0	0	0	0	0	0	0	0	0	0	0	0	0	0	0	0
LPI(18:0)	702.7269086	0	0	0	0	0	0	0	0	0	0	0	0	0	1003.511263	1142.216967	0	0	0	0	0	0	0	0	0	0	0	0	0	0	577.6143751
LPI(18:1)	0	0	0	499.7782283	0	0	0	1028.877307	363.9792434	0	0	0	0	0	0	890.7973322	0	0	0	0	0	0	0	0	0	683.4546378	0	0	0	0	0
LPI(18:2)	0	0	0	0	0	0	0	706.9645423	0	0	0	0	0	1002.052308	835.4235403	0	0	0	0	0	0	0	0	0	0	0	0	0	0	0	0
LPI(18:3)	0	0	0	0	0	0	0	0	0	0	0	0	0	0	388.5024776	0	0	0	0	0	0	0	0	0	0	0	0	0	0	411.3025	0
LPI(20:0)	0	0	0	0	0	0	0	0	0	0	509.4713517	0	0	0	409.032	306.6096058	0	0	0	0	0	0	0	409.1944214	0	0	0	0	0	0	0
LPI(20:1)	0	0	0	0	0	405.1539801	0	0	0	0	0	0	0	0	306.7590145	0	0	0	0	0	0	0	0	0	0	0	508.8251093	0	0	0	0
LPI(20:2)	0	0	0	0	0	0	0	0	0	0	0	0	0	408.7767602	0	0	0	0	0	0	0	0	0	0	0	0	0	0	0	0	0
LPI(20:3)	0	0	0	0	0	0	392.3600142	0	0	0	0	0	0	306.7739996	0	0	0	0	0	0	0	0	0	0	0	0	0	0	0	0	0
LPI(20:4)	0	0	0	0	0	0	0	0	0	0	0	0	0	0	0	0	0	0	0	0	0	0	0	0	0	0	0	0	0	0	0
LPI(20:5)	574.5707202	0	0	0	0	0	0	0	0	0	0	0	0	0	0	0	0	0	0	0	0	0	0	0	0	0	0	0	0	0	0
LPI(22:4)	0	0	0	0	0	0	0	0	588.5513221	0	0	0	0	0	0	0	0	0	0	0	0	0	0	0	0	0	0	0	0	0	0
LPI(22:5)	0	0	0	0	0	0	0	0	0	0	0	0	0	0	0	306.6087462	0	0	0	0	0	0	0	0	0	0	0	0	0	0	0
LPI(22:6)	0	0	0	0	0	0	0	0	0	0	0	0	0	0	0	0	0	0	0	0	0	0	0	0	0	0	0	0	0	0	0
LPS(14:0)	0	0	0	0	0	0	394.8201352	0	707.3798753	472.8893372	0	0	0	600.3908539	1000.625887	0	0	0	0	0	0	0	0	0	0	0	0	0	0	0	493.4074582
LPS(16:0)	3028.291119	965.7712875	2462.690446	2104.933064	2796.540646	2227.243361	2572.462986	1756.306533	1044.019826	1421.605305	1311.779399	357.3961198	1062.982592	0	2506.654816	392.4957904	1705.361574	2640.381727	3490.051495	0	2920.977481	790.4292148	1046.614898	2205.783433	1099.915282	2728.911694	0	0	0	1712.155947	3433.07059
LPS(16:1)	0	0	0	0	0	0	0	0	0	0	0	0	0	0	0	525.0439524	0	0	0	0	0	0	0	0	0	0	0	0	0	0	0
LPS(18:0)	586.36074	0	0	1039.036175	0	1044.559808	972.0802274	586.6862523	497.7160964	0	927.2975567	0	974.2336901	1311.308709	410.2245081	625.5165278	1247.015468	0	0	0	433.3213284	519.4173885	314.2749489	0	0	930.404091	0	0	0	411.3792322	0
LPS(18:1)	0	0	0	912.7166254	0	0	0	0	370.6414516	0	0	0	0	0	482.4689765	1120.469852	0	0	404.5157552	0	0	0	0	0	0	0	0	0	0	0	0
LPS(18:2)	0	0	0	549.2341875	915.5349571	1190.486599	1533.081025	1147.214813	0	0	0	0	0	0	0	0	0	0	1645.032511	0	0	0	0	0	0	0	0	0	0	0	939.3515298
LPS(18:3)	0	0	0	0	0	0	0	479.8555735	0	0	0	0	0	345.2248667	0	0	0	0	0	0	0	361.8625507	0	458.3084994	0	0	0	0	0	0	0
LPS(20:0)	0	0	0	0	0	0	0	0	0	0	0	0	0	0	0	0	0	0	0	0	0	0	0	0	0	0	0	0	0	0	0
LPS(20:1)	0	0	0	0	0	0	0	0	0	0	0	0	0	0	0	0	0	0	0	0	0	0	0	0	0	0	0	0	0	0	0
LPS(20:2)	0	0	0	0	0	0	0	0	0	0	0	0	0	0	0	0	0	0	0	0	0	0	0	0	0	0	0	0	0	0	0
LPS(20:3)	0	0	0	0	0	0	0	0	0	0	0	0	0	0	0	0	0	0	0	0	0	0	0	0	0	0	0	0	0	0	0
LPS(20:4)	0	0	0	0	0	460.7010204	0	0	0	0	0	0	0	0	0	0	0	0	0	0	0	0	0	0	0	0	0	0	0	0	0
LPS(20:5)	0	0	0	0	0	0	0	0	305.1966127	0	403.139014	0	0	305.7086371	407.0555866	0	0	0	0	0	314.8581128	0	0	0	0	0	0	0	0	0	0
LPS(22:4)	0	0	0	0	0	0	0	0	0	0	0	0	0	0	0	0	0	0	0	314.198	0	0	0	0	0	0	0	0	0	0	0
LPS(22:5)	0	0	0	0	0	0	0	0	0	0	0	0	0	0	0	304.9799953	0	0	0	0	0	0	0	0	0	0	0	0	0	0	0
LPS(22:6)	0	0	0	0	0	0	0	0	420.6669551	0	0	0	0	0	0	304.9872297	0	0	0	0	0	0	0	0	0	0	0	522.1231069	0	0	0
PA(14:0/14:0)	0	0	0	0	0	0	0	0	1615.733015	0	0	0	1018.614315	0	0	0	1526.441278	0	0	0	0	0	0	0	1010.168657	0	0	0	0	0	0
PA(14:0/18:1)	0	0	1045.043642	0	988.3549266	0	1048.824539	0	0	0	0	0	0	2191.115672	1044.176034	0	0	0	0	0	1027.983877	0	0	0	0	0	0	0	0	0	1001.901606
PA(14:0/18:2)	0	0	530.9928738	1007.5678	0	0	0	481.4231881	1622.852893	0	0	0	0	0	1143.483122	1700.57257	562.5258616	0	0	0	0	0	0	0	0	0	0	0	0	0	580.0847578
PA(14:0/18:3)	321.94989	0	0	0	247.2386985	229.7021801	0	0	1083.409546	0	0	0	1301.285528	0	0	0	0	0	0	0	0	361.0360413	434.938213	370.5654014	0	0	0	0	0	0	0
PA(14:0/20:1)	0	0	0	0	0	0	0	562.7242364	0	0	0	0	610.5211279	0	0	0	0	0	377.1816468	0	0	234.1259402	0	0	0	333.4086045	0	0	0	249.4134459	0
PA(14:0/20:2)	0	0	0	0	0	0	0	0	1065.43243	0	0	0	0	1094.268416	0	0	0	0	0	0	0	0	0	0	0	0	0	0	0	0	0
PA(14:0/20:3)	0	0	0	0	0	0	1049.346877	0	0	0	0	0	0	0	1573.64608	0	937.8471335	0	0	0	0	0	0	0	0	0	0	0	0	0	0
PA(14:0/20:4)	0	0	0	0	0	1044.973362	0	0	1057.344217	0	0	0	952.2315035	0	0	0	0	1579.398377	0	1045.976253	0	0	0	0	0	0	0	0	0	0	0
PA(14:0/20:5)	0	0	0	0	0	0	0	580.173907	0	0	0	0	0	0	0	0	0	0	0	0	0	0	0	1578.580305	477.7479549	318.385395	0	0	0	0	0
PA(14:0/22:4)	0	0	0	0	0	0	0	0	0	605.3882913	0	0	0	0	0	0	1036.166524	0	892.4038665	0	1556.106468	0	0	0	0	0	0	0	0	1053.834643	0
PA(14:0/22:5)	0	0	1506.080003	0	0	0	0	247.0226135	0	0	0	0	0	869.7086674	0	0	0	0	0	0	0	0	0	600.4838799	0	0	0	231.7339141	0	0	250.5329299
PA(14:0/22:6)	0	0	0	0	0	0	0	0	0	0	1048.73694	0	0	0	1182.524734	1154.85496	0	0	1053.522899	0	0	0	0	0	0	0	0	0	1587.107083	0	665.6990391
PA(16:0/14:0)	987.5945817	0	0	0	0	0	0	0	0	1040.099381	0	0	1079.566802	4175.488846	948.2473534	0	0	0	0	0	0	0	0	0	0	0	0	0	0	0	0
PA(16:0/16:0)	1002.194032	1286.630595	0	0	1269.365792	0	999.3602218	3017.84372	0	1190.75465	1017.089268	1168.402012	0	1561.991938	0	2090.503141	0	0	0	0	0	0	0	2051.548139	0	1003.592805	0	0	0	0	0
PA(16:0/16:1)	0	0	0	0	0	0	0	0	0	1050.013404	1003.550157	0	0	0	0	0	0	0	0	0	0	0	0	0	0	0	0	0	0	0	968.049547
PA(16:0/18:0)	0	0	0	0	0	0	0	930.7869612	0	1609.76527	1052.951701	0	817.5648089	1041.999337	0	0	0	0	0	0	0	0	1009.704412	0	0	0	0	0	0	0	0
PA(16:0/18:1)	9646.351398	0	9806.553303	0	834.3864234	1440.251772	9264.686548	0	0	2355.846688	2600.801243	873.6927744	0	2191.248935	0	1143.757389	992.5320637	4383.594912	3454.341901	0	4020.799338	1056.58469	2020.604605	0	0	0	879.4955322	0	1465.220815	1438.700525	944.8806852
PA(16:0/18:2)	0	0	942.2403587	1047.414821	0	0	0	1515.959693	0	0	0	0	0	0	1588.161185	0	0	1551.913481	1527.210334	1041.730337	0	0	0	1564.517714	0	0	1000.011693	0	0	0	1001.914305
PA(16:0/18:3)	0	0	0	0	0	1055.90788	0	0	1075.195269	0	0	0	0	1069.257885	0	1046.209766	0	0	0	0	0	0	1072.156513	1574.422001	0	0	0	0	0	0	0
PA(16:0/20:1)	0	0	0	0	0	0	0	0	0	0	0	0	0	0	0	0	0	0	0	0	0	0	0	0	0	0	0	0	0	0	0
PA(16:0/20:2)	0	0	0	0	2042.279871	0	0	0	0	0	0	0	0	1059.637793	2041.073569	1046.209766	0	0	0	0	0	0	0	0	0	0	0	0	0	0	0
PA(16:0/20:3)	0	0	0	0	0	0	0	0	0	0	0	0	0	1062.092193	0	0	0	0	0	0	0	0	0	1047.278737	0	0	0	0	0	0	0
PA(16:0/20:4)	0	0	0	0	0	1419.451817	0	0	0	478.0431549	0	0	0	0	1567.612635	0	0	1054.10551	0	0	1018.95569	0	0	1035.23242	0	0	0	0	0	0	489.4910676
PA(16:0/20:5)	0	0	0	1019.950409	1053.259437	1001.355347	0	1544.484767	1079.31435	0	0	1055.009384	0	0	0	0	0	0	0	0	0	0	0	0	0	1039.655804	0	0	0	0	0
PA(16:0/22:4)	0	0	0	0	1196.522324	0	0	0	0	0	0	0	3151.695878	1048.098304	0	0	0	0	0	1054.213511	0	0	0	855.6357307	0	0	0	0	0	0	0
PA(16:0/22:5)	912.2598844	0	0	0	1042.980198	0	0	0	0	0	1057.280756	0	0	0	0	0	0	0	0	0	0	0	0	0	0	0	0	0	0	0	0
PA(16:0/22:6)	1572.868432	0	0	0	0	0	0	0	0	0	0	0	1027.168238	0	1016.29261	1051.41762	0	0	0	0	0	0	1053.938413	0	0	0	0	0	0	0	1049.412509
PA(18:0/14:0)	0	0	0	0	0	0	0	0	0	0	0	0	0	0	0	0	0	0	0	0	0	0	0	0	0	0	0	0	0	0	1390.912839
PA(18:0/16:1)	1540.106836	1010.271441	2020.310091	5937.858499	3508.102364	1518.368699	1533.356787	1518.033297	2622.832814	3991.557679	3492.060292	1501.738442	7835.26788	2737.955087	6167.821973	1615.904671	2532.071526	5063.67498	5566.617704	3028.995903	5383.703907	3136.065275	2524.927703	2077.276642	2526.079218	477.1716753	2001.441375	3994.258812	0	2021.724953	4049.634685
PA(18:0/18:0)	1926.485253	0	5214.476293	1303.98703	1368.46304	1977.797912	2065.400239	2056.625083	0	2991.881304	1464.375994	1011.997433	5328.782698	1562.758562	2847.75414	2615.564426	2529.632795	5054.094922	3498.477369	0	4098.21848	2286.45248	2544.498349	1428.718679	1561.380792	1485.609803	1993.519194	1027.497233	0	2713.607007	1143.496196
PA(18:0/18:1)	72927.79732	51762.03767	126467.2931	140900.0001	107055.4694	130726.7914	77379.20649	74208.54931	78839.08159	93574.16092	121172.6269	87658.28496	248772.9462	99180.64594	94269.01531	87102.33385	111740.8111	180692.3147	198661.1543	55167.8497	180089.1795	92792.56911	45470.82578	76642.43948	108143.3418	59037.69493	35571.05324	57364.10664	47950.20515	77625.03805	124788.8366
PA(18:0/18:2)	185993.9549	71444.03167	150967.4624	237023.4952	144833.062	546572.0448	146895.0577	244178.588	91176.16161	151050.2952	194295.3547	131980.8056	322023.5144	317578.0429	220965.6474	151509.5539	271085.8233	295618.6188	486398.124	109568.8114	470277.0672	99191.44111	46985.09706	139520.5808	278753.648	111424.0297	64831.22701	36664.16392	64961.93321	168122.7751	407135.6932
PA(18:0/18:3)	1004.60036	0	3530.542288	2020.783138	0	8614.981137	0	1542.637142	2623.105337	8177.367312	2792.344325	0	6031.645265	7978.913286	1568.35782	1581.846916	4041.905208	2502.250684	3527.946016	1028.063097	7593.547538	0	0	4485.386253	3605.98837	0	0	2019.575723	0	1515.950336	8415.806494
PA(18:0/20:0)	0	1027.737329	1689.651032	2981.03287	3937.1275	5924.684258	1037.159087	0	3135.818373	2349.850065	1507.017483	2030.749193	5256.212009	4342.277587	2066.932593	4631.906011	2667.861773	921.287111	3014.422452	1529.484025	7180.474778	5018.518363	1529.920947	923.7783944	1529.035664	3561.677518	0	980.805676	0	1552.734987	2058.260902
PA(18:0/20:1)	1551.627553	1022.578285	3571.614863	3522.330579	2528.013725	3061.202082	2587.163749	2564.516632	1045.877644	4053.570042	4011.624196	1525.57578	4563.209886	2604.757052	994.074372	3658.575516	4888.126548	2544.887524	3527.882546	3060.294763	2557.586604	2423.198636	2384.317869	2541.970428	1033.278509	1028.922676	2004.306213	0	0	2565.42288	2306.153509
PA(18:0/20:2)	4647.884313	3091.633969	1868.946595	4213.057507	1283.206607	2318.79736	1033.474838	1886.67139	3624.516896	4572.492432	4523.676227	2543.388705	8134.461497	1427.116703	1953.081231	1569.648216	3013.153058	5234.076035	7657.855019	0	9707.30127	4064.411075	0	4807.752184	3560.461289	2056.309081	1009.298536	1495.054086	1542.706093	2551.811523	3963.808661
PA(18:0/20:3)	52863.23709	18152.66397	62349.0782	63644.19366	56892.87163	83723.72077	30762.4618	60670.61146	34874.29543	66438.58246	88374.49154	41049.55797	144776.8677	101977.4428	72762.41892	46469.42892	69450.78088	100353.9197	125192.2955	33473.35274	99657.01127	53664.49543	18579.98957	36563.12611	75917.28466	27310.64089	15226.27229	18468.97891	23883.90296	34752.58137	59825.76173
PA(18:0/20:4)	544854.0557	163792.1632	793151.3108	634421.1254	633694.941	601149.8399	363223.0815	669324.3663	406755.0243	583110.4365	785834.2469	587528.4597	1335379.986	618502.5684	813575.2229	512321.7855	568061.261	941778.0706	1085085.376	268517.36	979168.5806	644133.4578	204271.3591	381666.0378	637964.1742	236001.5942	181978.2276	295139.8256	195937.8955	423276.7218	655592.6612
PA(18:0/20:5)	23552.46647	0	8846.126987	8294.051394	7261.684548	10243.24539	10152.56965	8991.156262	14043.79575	42919.3452	15411.48691	2068.088693	14815.92554	3963.34311	28947.16453	6793.54184	7241.381007	14567.43934	14039.97255	2605.311618	57248.10286	4670.147075	2602.405688	16424.35517	2083.466921	6193.051074	1536.369146	4106.812651	2047.950248	6243.288359	12908.78075
PA(18:0/22:4)	86805.95693	37213.44633	306563.0055	164329.3002	109227.682	96774.41436	83625.32735	170107.3521	175107.0505	107117.905	187405.8828	124094.2296	363909.383	69038.80953	191938.667	75793.59207	127007.5907	401481.2344	235160.2093	67662.15452	204336.3147	257832.8598	59340.13992	78803.35737	194799.4831	71440.34579	52308.2323	143931.227	63880.72538	90813.90777	105182.6151
PA(18:0/22:5)	82762.05241	21885.79551	114396.2459	98117.10347	122398.462	104565.6954	83403.6915	79324.32292	59503.15434	62394.57639	81116.09305	67201.82922	269063.7296	79282.20833	145197.2563	68093.01292	84505.80914	188551.5816	159001.4123	44718.3595	193104.1942	82143.07005	21068.2817	81815.5253	54888.71967	48035.64118	40408.07129	58789.60273	32953.90429	67585.00444	101511.3441
PA(18:0/22:6)	61821.53653	14477.93365	60913.78614	83883.36556	90046.71077	63703.55244	60008.6378	51543.82744	42428.2158	44874.9049	42584.60033	44682.82872	65806.72102	57636.28148	79056.67799	55733.45082	57964.0677	62792.20518	109374.6713	12467.31396	116030.8853	56810.35058	36500.99449	69774.31707	15117.73335	33141.90914	19173.87479	28348.25925	25852.61053	43258.81631	48717.28986
PA(18:1/16:1)	0	0	1542.738849	0	0	0	0	0	2089.902516	0	0	0	0	1568.490604	0	0	1065.705651	0	0	0	0	0	0	1036.717785	0	0	0	0	0	0	0
PA(18:1/18:1)	1549.421389	1505.947449	0	943.2870495	3035.663432	5792.688677	1543.492429	0	1556.036812	1495.38302	1072.018231	0	0	0	1545.917528	2644.755612	0	3530.155966	1513.42934	2023.923858	1420.647285	0	0	1514.817957	0	1885.971369	0	1002.959221	0	1018.642132	0
PA(18:1/18:2)	0	0	0	1010.584442	5064.001325	4508.022475	1547.31452	1007.970309	0	0	2390.013067	0	3878.911708	2923.21044	2297.720133	2105.455872	0	3158.477993	2526.034685	0	4562.097685	0	0	2525.894543	2018.374777	0	963.3448094	0	1494.571658	3007.909398	6640.044189
PA(18:1/18:3)	0	0	0	0	0	0	0	0	0	0	0	0	0	1077.833028	0	0	1036.166524	0	0	0	0	0	0	0	0	0	0	0	0	852.8667891	0
PA(18:1/20:1)	0	0	0	1041.885431	0	1043.569186	0	0	1046.081429	0	0	0	3014.003094	0	0	0	1012.848651	0	0	0	0	0	952.316509	0	0	0	0	0	0	0	0
PA(18:1/20:2)	1565.421767	0	0	0	0	0	0	0	1083.297496	0	0	0	0	1070.257029	0	0	0	1568.46134	1052.751404	0	0	0	0	0	0	0	0	0	0	0	0
PA(18:1/20:3)	2570.487002	0	1052.528344	0	0	0	0	0	1086.041022	3067.913674	0	0	1031.423741	0	3660.255389	1046.209766	0	0	1043.683456	0	1016.739033	1513.388705	0	0	0	0	0	0	0	1015.959192	1034.918972
PA(18:1/20:4)	3117.082478	0	3236.349957	4446.55771	9288.759179	2992.993885	4161.382362	9167.560728	2580.698666	3426.621037	2555.025711	2071.823645	6167.586425	4176.704642	4417.41471	2780.096217	2054.940873	4546.546366	6092.718279	1564.080591	9370.979956	7774.453745	3125.442668	7797.393154	0	1913.152268	2030.546797	1022.312295	3596.135475	3229.950218	2995.225664
PA(18:1/20:5)	0	0	0	0	1013.79659	0	0	0	0	0	0	0	0	0	0	1082.976562	0	0	0	0	0	0	0	1044.913838	0	0	0	0	0	0	1008.314787
PA(18:1/22:4)	0	0	0	1563.029906	0	0	0	1032.867758	0	0	1007.697978	0	1552.613134	0	0	0	0	0	0	0	1561.589741	0	0	0	941.7771353	0	0	0	0	0	946.3320934
PA(18:1/22:5)	0	0	1053.327138	0	0	0	0	1547.201573	0	0	0	0	0	0	2306.401658	1082.743754	0	1563.791588	1017.255724	0	0	0	0	1527.486866	0	0	0	0	0	2086.424651	1037.475335
PA(18:1/22:6)	3135.951515	0	0	0	3104.675597	0	1425.768261	502.1369879	499.9052672	0	0	0	0	2190.813774	1050.795635	2082.404208	0	1040.91138	1573.335681	0	2592.496609	0	0	2605.686589	0	0	0	0	0	0	1028.804178
PA(18:2/16:1)	0	0	0	0	0	0	0	0	1011.956291	0	0	0	0	1072.236695	0	0	0	811.0118588	0	0	0	0	0	0	0	0	0	0	0	0	0
PA(18:2/18:2)	0	0	0	1042.962192	0	0	0	0	0	0	0	0	0	1103.492378	0	0	0	0	0	0	0	0	0	1008.844383	0	0	0	0	0	0	0
PA(18:2/18:3)	0	0	0	0	0	1027.091792	0	0	0	0	0	0	1047.563632	0	940.8316594	0	0	0	0	0	0	0	0	0	0	1008.048063	0	0	0	0	1039.855987
PA(18:2/20:1)	0	0	0	0	0	0	0	0	0	1221.423036	0	0	0	0	0	0	0	0	0	0	0	0	0	0	0	0	0	0	0	0	0
PA(18:2/20:2)	0	0	0	0	1719.292068	1088.150622	958.9015309	0	0	0	0	0	0	1615.941571	0	0	0	0	0	0	0	0	0	0	0	0	0	0	0	1132.491247	0
PA(18:2/20:3)	0	0	0	0	0	0	1020.296915	1572.423653	0	0	0	0	0	2090.623886	0	1070.917702	0	0	0	0	0	0	0	0	0	0	0	0	0	0	0
PA(18:2/20:4)	0	0	0	2074.747004	1555.379587	0	0	459.2910148	0	2551.229406	2901.319052	0	2558.927581	1567.830363	1046.769642	1043.24895	1537.037392	0	0	0	2206.87572	1036.564874	0	0	1014.001172	498.3505887	0	1004.880237	0	1046.966397	2578.119935
PA(18:2/20:5)	2096.649758	0	0	1042.962192	0	0	0	0	840.7187187	1018.910175	0	0	0	1098.866464	0	0	1009.856716	0	0	0	0	1563.624984	0	0	0	0	0	0	0	0	0
PA(18:2/22:4)	0	0	0	0	0	0	0	1033.717738	0	1012.082869	0	0	0	0	0	0	1044.867388	0	0	0	1548.411324	0	0	0	0	0	0	0	0	0	0
PA(18:2/22:5)	0	0	0	0	0	0	0	0	0	0	0	0	0	0	0	0	0	0	0	0	0	0	0	0	0	0	0	0	0	0	0
PA(18:2/22:6)	0	0	0	0	0	0	0	0	0	0	0	0	0	0	0	0	0	0	0	0	1563.649358	0	0	0	0	0	0	0	0	1044.75814	0
PA(20:0/16:1)	0	1003.161649	9747.355642	11624.00404	6763.441754	6551.892405	2581.501044	5120.775206	9045.181165	4479.29574	4734.662152	12673.70733	21257.75637	2595.980815	10159.81415	4621.944877	8057.24727	8723.161368	19201.95847	2889.984396	11192.89471	10580.73412	6384.025697	1493.435552	4802.86642	9757.710517	0	6542.847125	1513.031781	7136.162655	11210.98808
PA(20:0/18:1)	89328.93711	23758.63575	109602.6751	158935.7414	123310.4198	134845.8435	49403.39503	66125.43748	68575.6882	83794.52725	128124.3416	79545.37798	209867.463	100143.0649	84214.48739	72290.70436	109962.8677	148024.8403	196712.4986	22940.1982	161961.0906	94452.02158	34594.1152	41331.72584	63489.44802	54687.29366	36041.30956	25040.3469	32087.82733	68584.73792	120710.1548
PA(20:0/18:2)	240720.7992	84854.16256	288739.4707	429038.368	288999.7361	726430.1486	302193.7408	320527.0426	159299.8306	217529.312	324113.6089	204167.769	473124.6838	517544.0727	299898.559	243686.6027	522515.8431	470574.3004	876424.8944	125517.6306	800503.9252	224414.5632	78949.23189	199667.9353	315581.8408	155051.8879	86020.59486	79065.78784	115729.9098	276883.4026	640168.1647
PA(20:0/18:3)	3043.380265	1039.164124	3119.069015	4585.154111	1852.590477	5224.426562	2802.53814	3090.354829	5157.67479	18347.08195	5618.275443	1544.918072	9616.626925	3441.998245	1935.499103	4495.002079	3767.03898	10280.69679	6259.368425	1030.273	10037.76882	1997.743096	4127.45576	2033.445423	8128.60316	0	0	1020.193561	0	4360.506748	7493.048976
PA(20:0/20:1)	1345.151527	0	0	3311.45983	923.2252556	1531.2122	5675.056505	2061.141869	4695.220777	1012.464227	2524.37057	1022.120552	8131.80423	1044.065865	3124.758538	474.3166826	2729.121333	2049.59575	0	2840.819251	4123.878263	1952.8135	1560.940326	1554.070276	2038.210301	0	1523.999806	0	0	4154.606559	3844.095838
PA(20:0/20:2)	1958.484731	1239.645396	1551.037531	3633.796371	3548.385288	4509.686466	2464.965917	3961.54517	1514.011954	2757.169504	3612.172221	2064.793871	1767.510635	4130.399582	7844.118125	2603.115068	5875.482433	2368.252731	9172.418395	1029.434757	9363.600347	5205.4892	2075.838943	1528.303187	1541.301957	0	1042.072984	1044.515036	0	4736.729588	3770.756004
PA(20:0/20:3)	94502.46334	9762.946517	104726.2477	131754.0835	135979.7688	113551.8788	41460.13285	93668.57562	62261.29307	97565.01679	106731.4912	87468.41847	166808.3667	151898.4066	85488.33671	70847.89557	114805.8316	134891.8286	179391.8632	21854.58007	187257.1457	100027.2283	27691.01898	44539.96929	72217.85378	24557.30216	21180.08653	21149.42971	20442.39145	56732.07929	109842.5341
PA(20:0/20:4)	838187.4613	236888.3356	1361746.154	1047029.896	1453153.707	903915.5797	524233.8904	1294487.963	769742.3955	1050298.777	1288683.615	1236022.977	2118040.082	1148432.87	975963.9308	736697.5745	1209949.464	1609688.439	1871425.471	334593.7616	1688908.052	1274341.082	466551.5504	496195.2774	791422.2614	291179.7108	292569.5993	482597.681	316358.3929	921771.4498	937752.1896
PA(20:0/20:5)	46630.37366	1541.784119	25017.70093	20331.2675	41180.84172	17549.96984	37586.40244	30645.14017	39828.09181	125393.7527	26590.89735	12475.54583	20271.90517	13746.12807	42001.14524	8337.868573	39095.27543	26981.07537	36056.38398	6262.413631	110577.2199	17284.18965	6785.470498	24471.35468	12231.49987	9825.207666	11385.72489	4675.596707	8701.411567	28677.97565	24597.64491
PA(20:0/22:4)	54157.21371	33939.57019	326289.9911	130191.5874	76049.41896	65687.57837	40643.08211	153823.9158	219388.439	77656.49172	152043.5591	134764.3847	425868.7122	50086.09093	123536.3556	65585.67325	168717.3148	406243.512	208556.087	27150.20551	157099.7417	242874.6634	78719.67868	44425.35957	118212.5427	36743.92714	54527.9577	108590.8753	65048.18572	93430.41418	74256.39846
PA(20:0/22:5)	64749.15205	12911.25015	116755.3694	79045.90396	93354.33063	81957.07657	40987.37839	76883.34965	73456.65997	57938.64785	98486.26757	80685.3344	226083.2504	67641.42037	105365.2385	53684.60963	70327.54031	194302.974	121119.3755	14510.98054	128251.8701	65264.72206	54286.16552	56023.32089	41166.01477	39657.609	36705.98035	52150.73344	42083.46375	59942.50806	59549.54942
PA(20:0/22:6)	56348.94143	14603.46804	68634.17171	90372.45475	130077.4617	72605.96757	53924.67382	59687.4984	62028.22602	56157.80512	68125.26581	64956.91669	89078.39997	77718.1737	74814.67736	68976.85977	82204.5277	69815.57911	172129.6666	10180.23388	204110.0775	81929.12652	42966.52047	65068.9767	17512.65032	33639.67631	31387.84839	21181.532	28646.08826	76032.7363	65297.8142
PG(14:0/14:0)	425.2019428	611.7967841	0	962.0353004	0	0	0	0	565.270617	252.0735262	257.0718696	0	0	889.0211581	755.0634619	0	0	0	0	0	0	0	0	0	0	1130.862848	0	400.8212779	1150.612522	0	0
PG(14:0/18:1)	394.9163998	0	560.9181686	1600.603927	2458.054063	649.3494523	1576.381549	1101.782425	1457.751608	1364.980362	1344.057737	1485.355956	2480.273241	1332.283793	1679.028499	2070.728163	1188.742496	646.7450906	1666.294994	0	1431.827061	961.5265619	415.5720261	1699.691228	420.5923099	1852.640575	414.4320415	416.7736949	692.3010561	558.6582468	1580.671262
PG(14:0/18:2)	1034.531858	553.4708531	507.7837018	1103.446198	699.3773049	2209.627724	767.0509524	900.4959756	1481.824018	772.5914293	1682.483414	967.9237321	2568.359432	803.4936832	1921.577523	1536.551758	2635.263098	1527.142981	1461.137495	276.8350444	2225.616814	1114.801313	275.531231	691.4818907	827.5189307	659.4143117	0	0	386.3998645	1381.664899	2754.808925
PG(14:0/18:3)	0	0	0	401.7285982	0	0	0	0	660.0671582	400.3837178	533.5462562	0	0	293.8004842	858.4541104	0	0	0	0	0	505.5601207	0	0	0	0	0	273.3906593	274.8335859	274.7752516	0	383.24
PG(14:0/20:1)	609.3003262	0	0	0	0	0	490.3081079	0	0	744.3107697	266.3243986	284.585126	373.1639866	0	0	0	660.077293	0	0	0	494.9311	0	0	0	0	0	0	279.1022229	0	0	0
PG(14:0/20:2)	0	0	0	407.2346501	274.4807121	0	493.1685701	656.7360698	0	0	0	0	272.0782434	0	398.1537248	369.1913928	0	957.4756033	0	0	276.4966434	387.6068513	275.4387493	278.4442002	0	0	268.9748026	0	0	0	0
PG(14:0/20:3)	0	0	558.4909781	0	0	277.0003075	535.9964471	0	0	507.8381254	0	408.1412376	1631.069965	0	0	0	523.8508815	546.117545	0	423.511585	708.365016	0	280.1005151	415.2032862	0	535.6276479	0	481.343123	0	0	669.2122134
PG(14:0/20:4)	592.9445436	529.1655057	1526.762504	549.6468797	876.4350368	962.2204029	0	3327.301613	914.3080419	0	0	1697.375529	2507.023872	2397.117406	1296.201038	1716.933928	3675.84556	1704.603508	1373.790599	0	1689.077023	1028.692763	419.2176735	1117.873092	1392.834399	1465.56616	544.0672015	0	267.6745771	1399.1974	1775.795388
PG(14:0/20:5)	0	0	0	0	534.2427814	523.9270102	0	0	0	0	0	0	0	0	0	0	0	0	0	402.9836716	0	0	0	0	501.1618742	0	0	265.5473286	0	307.8350435	0
PG(14:0/22:4)	377.6864214	0	0	0	0	0	497.3025702	0	927.0687383	0	862.4009929	407.3725767	1128.558881	890.7519789	652.337872	488.1272705	0	516.5481151	0	0	505.6047376	1260.399399	0	505.4771557	499.1781849	0	0	558.7951167	396.3676881	0	0
PG(14:0/22:5)	512.2124309	0	0	501.8862508	752.424684	749.4373581	0	1014.720448	0	563.2283245	273.6141142	697.5000763	1240.796351	0	0	0	999.9507039	0	620.7119028	0	502.9113486	0	0	756.9578876	504.6676446	507.3385733	0	271.6040832	0	508.2338349	1008.292937
PG(14:0/22:6)	632.1495338	279.7559103	263.2373153	414.4454575	1254.865491	0	642.7089013	936.2425013	546.0957931	268.1865853	553.7422497	278.5966138	549.6163573	1576.223419	1591.525368	727.8000967	1536.762788	1380.351448	410.4260527	261.3396187	1258.167492	837.5725972	830.6164032	847.4393308	279.5121418	671.7653157	0	0	562.9929394	0	805.5169416
PG(16:0/14:0)	1365.506615	0	955.8522169	940.8799044	6579.023838	488.9676866	0	1616.800463	653.4842254	16255.45892	1314.780513	956.3020348	0	0	2938.814595	1207.59482	811.652666	819.3494599	935.7850643	414.962776	1372.705134	635.3056508	413.3872009	1910.93186	270.3202272	1028.832304	0	0	793.8041711	552.8570284	1145.591838
PG(16:0/16:0)	9137.174507	5646.82639	12774.64128	9419.178551	28159.96238	6563.929587	3058.859267	6795.666654	4986.361114	39727.12167	13238.83246	10667.96924	10574.62999	3156.843793	16650.41366	14843.988	11938.99683	9713.038449	10753.59711	4605.419878	8383.172392	17897.24307	11789.80361	9956.599013	3755.351088	7113.658801	4801.332043	4909.874885	6246.937758	6607.057377	6007.188068
PG(16:0/16:1)	3553.718463	1110.760204	2095.982047	2649.355888	23813.25557	2370.802395	3122.306383	3359.380467	2210.06911	71049.49911	6585.070485	3573.412751	1925.778939	1315.213603	8135.622443	6009.368019	4807.162942	1183.680252	4477.060044	2225.197172	6191.418259	6291.454827	1809.906714	6006.555241	0	6752.096659	1780.417731	2859.172146	2319.321812	698.7648699	3176.056373
PG(16:0/18:0)	4860.645933	1257.334341	10450.81524	4822.407288	16042.21921	7182.563788	3341.725783	3585.06926	5669.0953	10348.60444	7425.14636	8041.198124	6911.901802	3157.15751	11276.9051	4594.035422	9401.600546	9538.334835	12074.46571	1818.471319	8577.833571	13112.42728	4062.864538	7538.301282	2768.419881	6857.682218	3353.272141	3488.672809	3351.419785	1350.574449	6182.381664
PG(16:0/18:1)	58690.04685	34034.77769	149910.3705	156738.9694	350980.809	73990.82949	119179.1977	120981.3674	163393.0737	297996.4528	125877.7138	244915.4845	201334.2279	84525.34374	144540.1788	157328.0509	221874.4858	99246.44892	128517.0678	26559.54731	182609.8701	256874.7896	131011.1753	173788.0612	25411.23121	208493.4863	84233.81875	75888.6634	84434.08749	85529.27085	111894.9953
PG(16:0/18:2)	27214.22015	9490.771328	38617.31032	26132.07204	111905.7424	49527.6874	24803.52605	32457.47074	18176.69439	118727.1227	53017.05726	48811.79583	45492.45613	24536.36341	51931.92148	52833.93137	45328.75788	27347.36368	41980.02012	6145.656327	50315.73653	68097.6705	32585.39905	35593.9461	13407.6	50268.94794	18753.86866	22592.95898	21011.52212	21101.98949	46834.57957
PG(16:0/18:3)	0	265.5626545	1820.58932	277.197419	2124.599704	2220.217176	0	399.196628	0	2370.878927	1113.726277	1528.239397	1398.469574	0	697.5187611	1533.00049	695.2539023	837.3665868	1919.319781	417.3793557	1671.773866	1531.6293	0	520.9241209	0	1053.533001	267.5019989	0	543.4161006	679.8577583	2115.265
PG(16:0/20:1)	805.2859152	282.9133006	834.3338842	2373.10517	2362.005155	558.5602687	507.3299339	1469.124214	1563.072038	2171.964482	1065.694927	2005.08833	2591.380107	521.1690672	1826.268464	908.8242772	1536.581153	1113.512928	1531.555368	277.0892598	1806.19108	2365.810276	2098.253305	1952.467446	418.4355262	937.9504678	938.8915879	1053.198086	0	698.0641135	2808.581495
PG(16:0/20:2)	12371.23095	4176.974747	15756.81279	21231.60911	32339.01064	10643.04682	10479.32309	13719.31911	16914.14636	20505.94052	12166.98903	21755.30634	19209.69976	9562.49813	22148.32821	14466.16157	18360.50596	13576.25665	17504.37132	2232.083333	21741.89624	8909.057128	15673.70464	21554.4838	4190.691637	16506.01036	10873.0544	6568.699648	11219.44039	5249.434582	17447.72945
PG(16:0/20:3)	1868.647773	0	3404.106694	3619.412322	4759.670092	6850.837101	804.88354	2203.482405	3660.466883	2890.041893	3788.961558	4936.487202	2208.411864	2126.079811	4531.289949	8703.701272	2336.243108	3445.606301	6403.486794	418.3312707	11233.06244	2430.289829	2095.930384	4702.008449	539.704205	4058.596623	2211.780205	701.0423778	1941.603368	1519.177573	7066.64498
PG(16:0/20:4)	7230.850137	1193.023754	7348.232194	5966.644658	22458.52499	14993.8256	4912.525407	9849.744913	9805.183874	22920.87687	19856.16667	20001.90629	7936.131259	10082.56406	27197.10107	21355.22843	10345.87552	14655.06119	14714.40748	5381.216211	15716.48373	25192.92934	5431.510414	9729.186676	5283.372161	7308.814458	4724.691002	3272.789644	6459.556671	4333.462115	17619.586
PG(16:0/20:5)	532.1919527	0	0	403.1722323	686.3868894	818.0083797	0	0	1334.603832	964.009701	408.4639764	416.3667772	0	541.0845086	1071.252468	0	0	1229.239383	1091.719062	550.23433	275.206599	0	274.6606063	543.4450341	0	0	281.2536316	0	0	548.5853512	533.8530718
PG(16:0/22:4)	0	0	2203.834238	551.5127337	551.4498294	0	405.994953	934.7839309	1184.435453	1214.456621	532.6850653	695.4506702	1373.778109	0	796.556291	0	672.5162202	1511.006533	0	822.2765127	0	686.7475852	691.0772834	0	413.4960963	534.1582095	265.6143823	400.1784879	408.2964567	0	667.8558293
PG(16:0/22:5)	401.9950349	0	1661.098064	277.2105388	1245.707193	412.5549835	0	398.6904652	725.6354372	1370.500247	621.2261629	704.8034907	1365.720031	0	948.3962367	1141.438713	574.7624505	675.4738524	1652.335551	0	846.8535709	0	699.9984669	542.5242267	830.7811016	1204.688496	871.2056935	0	386.0011063	0	0
PG(16:0/22:6)	482.6365514	0	411.3029816	0	415.5690929	1105.422039	0	726.2777479	1030.00342	1388.493664	1153.711015	747.8033614	884.8993169	1081.250647	2490.738513	1141.924488	780.7515038	273.862132	0	0	1108.899125	1639.104558	959.2390672	690.2579609	0	968.0170329	529.7987294	0	380.5139936	703.6418767	484.0145483
PG(18:0/14:0)	0	0	258.6844961	560.061599	983.968719	693.627236	717.6814208	690.6138266	539.2604928	4649.107426	397.0349482	825.0975276	259.955357	0	1708.887746	900.9658001	837.4912142	562.788511	837.0160035	423.3929566	1397.587422	841.7124687	415.6871678	417.3677114	260.8460402	482.2835684	0	264.5827973	0	0	735.4667154
PG(18:0/16:1)	2285.655045	417.6426842	2267.117547	1945.476913	8233.50909	1115.633038	0	1205.729484	633.5275756	15079.54927	3289.059737	1261.30092	2094.13006	1043.747239	6593.556864	502.5840182	1260.803156	1252.727046	1688.661458	699.0213714	1111.882278	3202.960709	0	3125.61699	0	2137.990777	0	820.6802359	954.4195585	545.9964563	1201.053483
PG(18:0/18:0)	2137.036154	1115.763356	4758.467393	3933.365846	5338.038603	3333.362157	2959.076957	2566.963555	4579.675795	10155.58192	3508.101722	4555.777085	7686.137865	3368.868784	6162.709534	4501.795838	7490.935554	4290.048905	3460.776772	419.3609649	4041.136833	9829.81583	1938.271994	6946.503674	0	5395.637519	2092.440576	2489.512859	1963.599375	2235.258682	2260.02216
PG(18:0/18:1)	53550.03238	19757.24687	99438.60244	65965.87078	133821.4238	45867.59704	52338.91491	52988.23936	103752.1913	183116.5359	70837.97893	101616.2017	99863.42157	61361.69215	115915.1576	106450.7861	130895.1153	72921.84511	55800.78839	8807.078277	86118.8006	238346.7521	51866.9054	116448.4376	12510.11576	109367.8513	55779.99651	35373.65042	25196.27399	33259.22804	51299.17885
PG(18:0/18:2)	50131.10766	17950.83994	107536.7659	56478.82662	143926.1449	69247.234	57190.64717	83004.41258	101648.2016	164805.9729	98074.19457	91063.05572	101131.4868	59391.65526	114264.4217	75804.85889	77720.52729	63869.63091	65388.74754	8556.955684	75496.33638	126880.7538	79927.91984	96176.16165	19697.31167	109312.037	41942.76382	34380.67859	31112.07286	27240.61345	81847.27128
PG(18:0/18:3)	0	0	2082.004382	272.3918742	3067.202253	1816.148563	612.213595	0	1126.874765	1044.253038	409.1611428	831.2021771	979.3152568	977.1396551	1339.882847	1341.026244	969.4560702	694.746394	992.3467878	0	1388.62384	836.5855645	0	415.0370616	418.7972462	1696.359944	0	0	255.6310328	280.0279294	1576.561205
PG(18:0/20:0)	554.559183	0	0	689.0302949	817.3287088	586.4381555	1129.901509	897.6384566	1713.672374	1570.518283	1877.506561	644.8031556	1506.333766	962.1930708	1772.771317	1162.433797	951.0663453	476.1857214	641.1405898	0	503.551768	347.7759003	875.97674	477.9104495	477.5680277	1797.118907	0	580.1722552	829.8657608	628.7834711	560.2519162
PG(18:0/20:1)	936.5446138	416.0637496	1802.173037	1108.591998	1660.239947	556.5724184	531.8640863	0	756.8821976	2048.1327	1503.63165	832.2160213	1110.014889	1005.307694	2901.726691	508.061537	1107.339856	1107.192121	416.6249896	555.4257305	1944.631738	1663.753029	833.2203925	2909.877557	277.0397747	0	0	521.9350841	674.9368493	275.6949478	1999.286834
PG(18:0/20:2)	8258.942376	3331.725966	8498.830787	8730.980005	11449.9414	4272.579605	3745.601267	6096.338052	9263.890315	21520.35046	5254.234357	8460.394907	8984.002624	9349.592307	18570.2466	9795.985243	9745.215433	7736.138462	7115.644808	0	11302.09654	11983.61139	5686.860205	11632.25662	1246.621017	5010.915253	7766.631404	6171.21499	1516.597917	3755.9317	8583.725214
PG(18:0/20:3)	3393.410499	693.3838853	5556.553532	1802.144344	5193.476798	3428.150617	2008.115869	2373.299672	2924.122586	5065.579756	6519.024379	2738.951439	2601.105512	1069.540038	8570.425066	3417.227126	1799.205862	3402.798602	3709.231639	552.7213068	5799.442436	2318.921871	833.844894	4021.657093	853.1691041	5347.933528	1022.290815	1463.111372	972.9062182	1381.098741	5203.845666
PG(18:0/20:4)	6583.503208	1708.449974	24652.33028	6942.713582	17148.03535	6543.654346	2491.868551	6357.433578	14348.2323	12848.20046	12444.06209	13962.67722	16766.02695	7632.890368	22812.26633	11235.13276	11100.24423	20827.60474	21750.96552	2362.279428	12174.28376	15780.11173	5549.445941	8014.792967	7090.35852	8842.704783	6260.234763	7770.540884	4374.81492	5596.534333	7420.740786
PG(18:0/20:5)	0	0	514.6983115	0	0	0	0	383.77126	375.5898885	517.8524802	277.4004805	0	0	403.611144	492.841513	534.0028326	0	0	0	394.9541085	390.1900271	0	0	0	511.925578	0	0	0	0	0	0
PG(18:0/22:4)	0	0	376.2267333	0	0	0	0	0	0	649.336088	694.0770371	528.7848835	0	0	913.3125671	642.7423	0	1177.8054	1107.26116	0	649.4893673	0	0	0	0	0	0	525.7442171	392.4936091	0	0
PG(18:0/22:5)	0	0	801.0605932	799.9214357	0	0	653.9357122	0	1043.324732	670.7388212	529.9961939	411.2787287	1197.564423	0	0	557.7976818	0	401.7156337	0	0	398.3721689	0	0	0	0	0	0	0	417.3683327	398.6432693	0
PG(18:0/22:6)	0	0	0	0	0	0	0	0	0	476.1556124	0	0	612.3322035	0	937.5092324	0	0	0	684.803918	0	0	524.0125173	0	0	0	0	0	0	0	0	361.3713084
PG(18:1/16:1)	2646.013728	1248.398281	4428.62453	5533.831627	6100.684304	3418.639773	4062.759004	3341.052932	5332.881374	10283.2296	2788.662064	4247.190445	9259.2177	3654.636603	3293.343823	5334.368817	3822.706169	5134.074786	5086.093791	838.0238405	3362.481518	6194.709149	1941.881822	6086.821195	2201.214395	4567.113106	1870.539162	2027.663875	1412.153686	4444.67208	2665.046176
PG(18:1/18:1)	6248.16714	2222.07577	19476.48252	21514.84406	27049.8585	12562.68988	11971.18623	195426.7746	23947.14938	23534.51742	19626.89703	28922.4789	25155.55823	11227.19873	13137.8324	22940.02175	23377.10919	17186.35234	18045.43942	4574.471001	14970.58791	38535.97372	19757.29575	24427.98885	5918.640511	251863.351	6372.966292	12412.20577	11541.19663	15227.19405	78522.4455
PG(18:1/18:2)	26359.88733	13831.43512	80434.16652	239837.2883	69148.12039	95949.77207	130111.6713	45766.51606	66861.47126	72888.56043	31171.36179	131023.6002	141585.1146	40182.31094	119978.5282	25524.66463	106918.2852	17474.79338	29271.7505	7525.6731	80089.81274	80727.89205	106705.2263	123292.5846	18679.29101	112548.4812	97551.41128	96579.39226	71427.97796	246064.115	29341.8398
PG(18:1/18:3)	801.0471378	0	650.1964545	654.3682738	557.7867977	1455.326997	0	0	1020.070922	4108.925365	1166.923046	420.4729082	560.1098062	482.4857148	0	1697.060386	1659.799138	420.837059	417.2505454	279.6677897	962.3525408	279.1379543	0	0	0	802.9830133	0	0	741.4131651	4899.557073	1203.5478
PG(18:1/20:1)	0	534.3387061	597.4162838	0	0	0	0	389.6164391	378.8035966	413.2694291	261.3843293	0	0	0	0	0	0	0	0	0	408.1249129	400.0090132	800.9727599	1197.545621	0	0	532.8800969	0	798.1259673	0	0
PG(18:1/20:2)	0	276.1141362	1112.149525	839.5701063	554.7270648	0	540.8371379	530.2352057	1442.357448	1650.583693	1505.20145	1663.029704	548.5978227	392.6477908	526.410822	916.1325091	973.4278275	1261.916812	406.8665908	279.5358707	1672.017648	1439.849791	558.597376	1664.23576	277.8579921	1073.124922	0	0	794.8071277	1255.941768	1200.109821
PG(18:1/20:3)	0	0	1504.031729	1219.462262	803.1810641	555.857793	665.1558453	532.1747994	3182.515677	602.3610821	1292.161897	1423.283313	2372.149194	526.602827	1216.209831	1331.65404	1776.896706	640.3389257	880.559518	273.3264572	547.772085	540.3302313	411.7308559	544.9923345	410.2539564	1058.103543	266.2519977	717.0527384	0	1368.71781	0
PG(18:1/20:4)	4405.711467	1057.289541	9152.487946	4868.104058	9603.70899	5106.913323	1781.713136	2919.958044	1776.711764	5280.330541	1619.528833	6029.464138	8333.462694	2588.895327	3859.696043	3570.552784	7163.245898	5017.879026	4381.252318	1192.009612	6032.130398	3143.839836	1350.75407	4522.007373	1269.207666	4011.482238	1549.942541	1670.41207	1941.237342	3716.628573	2591.244446
PG(18:1/20:5)	793.2839074	0	964.8421664	0	413.218678	0	0	0	0	616.3309569	503.7199058	257.3537098	411.8607782	0	402.0677563	661.8347339	663.9207397	413.2908546	421.8411857	0	690.9860031	688.3379518	0	0	0	394.2806658	0	368.6047471	249.4163737	0	0
PG(18:1/22:4)	0	0	413.7679799	1108.026893	0	0	0	373.5064435	668.7047176	0	404.0623043	1657.920688	698.0657945	670.7311362	0	0	0	895.6978215	975.086657	0	834.838001	262.6185342	414.6163665	0	418.3017204	0	250.9546883	381.3654737	244.6269195	0	667.3197426
PG(18:1/22:5)	0	0	0	0	441.5804581	461.1557478	0	2070.430772	946.7650926	703.3650658	384.1625395	1012.232152	1209.207622	0	0	533.4410724	308.5163403	605.0509705	881.3945824	0	0	0	0	325.4418665	0	5449.973455	257.8269283	0	376.4447642	0	1744.916054
PG(18:1/22:6)	707.7148218	0	620.619321	0	1186.876065	358.0066333	0	1056.455198	537.4127182	1110.143527	0	823.2796535	366.1904026	808.3792302	802.7836955	0	712.2975437	479.6490794	1197.154343	489.8900715	1107.55372	356.2729859	0	2385.874414	0	2957.998279	253.5925361	493.6735851	505.9880823	0	1109.002016
PG(18:2/16:1)	6017.640444	2286.76903	6547.814647	6843.750737	8311.080184	7741.801573	3078.293341	3559.829022	11841.50298	6601.636459	5207.857584	5541.261849	6588.146698	18757.91121	12641.43584	6173.613974	15068.22012	7138.507554	14565.6631	1189.834788	10006.45728	11135.80748	7037.068649	7820.571544	3831.703647	8606.401797	2858.275056	2672.892517	4056.701633	8454.746599	6200.252656
PG(18:2/18:2)	3809.035843	1888.311096	23630.70623	7073.179605	4404.969799	8024.003662	7285.453707	34084.88009	21153.59982	7826.204867	13139.18037	13095.25256	26375.28643	9604.254325	11348.59455	9183.074368	11144.75466	20377.06509	9681.936561	960.5736752	17966.67836	12369.21754	4791.86104	8595.967927	6996.991903	34890.5854	3467.282679	6278.812344	7425.145243	8361.975032	19789.13119
PG(18:2/18:3)	1327.354815	0	1400.72488	1306.084066	2547.550778	4039.732569	1506.125165	426.6194546	1977.843311	3366.418353	947.236141	2858.736733	2824.150413	0	2089.454174	1356.374196	0	2350.7064	0	0	3091.598855	1659.157263	426.1442332	0	656.8816032	1629.686101	1853.950271	1341.187586	1325.557353	2719.14953	2013.167144
PG(18:2/20:1)	0	0	0	0	405.4323216	812.8067093	451.3317693	0	0	0	537.9839887	258.3007164	272.502197	0	0	0	0	0	0	0	541.8	0	541.6668988	0	0	327.6931426	0	0	0	0	564.9715389
PG(18:2/20:2)	1303.744453	876.1070307	977.6838226	2796.771026	2558.517538	1859.150655	5782.19617	1770.850807	5878.740832	0	1032.744151	1724.12625	11462.70529	2115.400271	1996.210653	1565.416407	962.3570861	2147.830018	553.3246243	0	2449.495891	2599.025999	2064.049599	2329.233327	975.9976337	2240.081559	0	1594.448774	1338.060621	5067.268741	1309.929234
PG(18:2/20:3)	0	0	0	357.2250398	352.5585183	0	0	473.9302604	0	2055.957914	687.7479496	769.7291625	0	767.6137033	619.5256326	0	0	0	0	0	388.8732884	0	0	517.2701992	0	0	450.5885003	0	0	495.0218189	0
PG(18:2/20:4)	1983.00715	369.5247997	3144.678697	2422.731545	6797.742579	1847.896453	2513.492501	8509.030504	4206.831638	4768.778977	2608.661383	4277.225447	7255.083331	2946.600625	3209.372744	5615.091681	751.735201	1913.36492	2387.246211	0	1790.965771	3609.496795	2045.549628	1831.823181	1183.820373	12141.97104	2021.126637	2288.285426	738.5739048	753.0594123	5509.1523
PG(18:2/20:5)	0	0	0	338.894897	573.3259067	0	0	0	389.304698	262.7847933	385.8159864	0	0	0	871.4646036	0	0	398.8137756	0	0	576.4530412	0	0	0	0	0	0	0	0	0	0
PG(18:2/22:4)	0	0	370.130205	0	0	0	0	367.1600422	526.3623546	380.5018537	391.0366192	0	868.412268	524.4288031	979.606028	0	0	1234.640358	0	0	0	0	0	0	0	0	252.2575065	0	537.3917788	0	0
PG(18:2/22:5)	0	0	0	395.0227895	0	0	0	352.6039363	396.1884423	573.3370757	413.6418187	0	0	0	0	0	0	0	727.0428906	0	366.2497735	0	0	0	0	0	269.070226	0	0	0	0
PG(18:2/22:6)	512.3647044	0	0	400.1954985	541.4924496	0	513.5090548	1066.057755	1299.778487	1547.141463	919.419245	552.1802571	0	376.3855581	385.8720309	0	662.2943789	402.7807634	0	0	534.3721391	405.9380226	662.2098929	0	0	1788.22607	0	394.9128935	0	0	1491.880838
PG(20:0/16:1)	0	0	1205.418417	0	744.2177631	0	0	0	0	660.724317	0	0	0	0	711.4024414	600.7515011	0	0	0	0	0	0	0	0	0	0	397.7783096	0	0	386.847593	0
PG(20:0/18:1)	0	0	0	1178.95939	661.0158661	900.2319304	1212.082097	0	875.463023	1262.862081	503.7651145	1121.101207	937.8348984	0	1163.539585	1571.025335	538.6795387	0	0	720.2795564	824.809191	1010.446761	1438.471382	1176.495568	0	1748.143061	0	632.5951417	633.611987	0	0
PG(20:0/18:2)	0	0	0	0	627.0616704	0	0	0	547.7829835	855.9570217	894.208521	0	0	0	1229.451174	0	391.4627266	1847.3887	0	0	0	0	0	821.3427432	0	0	852.1871567	458.0101965	492.8742399	0	0
PG(20:0/18:3)	0	0	0	0	0	0	341.0708068	0	656.0682748	407.5928428	271.3559126	0	0	525.0007856	0	0	0	0	0	0	0	0	0	0	0	0	287.869288	0	0	0	0
PG(20:0/20:1)	0	0	0	0	0	0	0	0	0	0	0	0	0	0	0	0	0	0	0	0	0	0	0	0	0	0	0	0	0	0	0
PG(20:0/20:2)	0	384.2852707	0	0	0	0	0	0	375.7809437	0	0	0	0	0	0	0	0	0	0	0	0	0	0	0	0	0	0	0	0	0	0
PG(20:0/20:3)	354.5355435	0	0	0	0	0	0	0	482.9749382	252.34261	252.7413105	0	0	0	0	716.2700338	0	393.3745206	484.6169887	0	0	361.2995491	0	359.1508031	0	476.490289	0	0	0	0	0
PG(20:0/20:4)	1401.419719	0	0	0	1074.048814	704.9620572	800.1526789	619.1713539	0	963.3767503	2208.874628	1157.872017	2147.916014	779.0820708	1166.850057	1604.505685	842.6121592	1086.853753	1289.643357	0	962.0006006	1351.733358	0	799.0677516	0	939.2490576	0	856.4485994	0	815.2607158	0
PG(20:0/20:5)	0	0	0	0	323.1959614	0	0	0	508.0487698	0	0	0	0	545.7704173	403.3749372	524.8961781	0	0	0	0	0	0	0	0	0	0	0	0	0	0	0
PG(20:0/22:4)	0	376.5161751	680.834629	0	409.702906	0	0	0	0	362.6959612	0	0	0	0	560.5783823	0	0	512.2250433	0	0	0	0	400.0462598	0	0	0	0	0	0	0	0
PG(20:0/22:5)	0	0	0	0	0	0	0	388.2173839	0	0	267.5677068	0	0	0	0	0	370.1737676	370.7810943	0	271.04434	0	393.911297	411.4510338	509.6829984	0	486.6348595	0	0	0	415.0201239	0
PG(20:0/22:6)	345.594862	0	0	0	0	0	0	0	0	392.2391585	0	0	0	0	437.6400268	0	0	0	0	0	0	0	0	0	0	345.4762354	0	0	0	0	338.3689071
PI(14:0/14:0)	538.8191612	0	0	0	0	0	0	822.5831017	880.03303	799.1928383	0	0	0	0	923.1468388	0	0	755.4139776	0	0	0	0	0	0	0	0	0	0	0	0	0
PI(14:0/18:1)	4325.495614	0	4730.208124	6360.030144	7989.075433	2505.671063	4072.228982	2395.375682	6008.636902	6430.055939	3709.276772	3699.491694	5228.063026	2187.525812	4836.584249	3390.023663	4860.260497	5425.414441	8478.568791	1153.615128	11484.17425	2813.546732	4294.516384	7369.93208	593.9233814	1712.448064	2927.57984	2091.231306	1932.915831	2703.246071	2890.424896
PI(14:0/18:2)	6782.313218	0	18292.33656	6623.311884	7131.509998	22238.53899	11546.07313	7881.52611	13194.99958	9935.884645	6641.252222	7710.671807	12025.72154	12543.21332	12985.57873	9196.381329	11182.26352	20889.0304	32493.94403	2622.260514	22099.40425	5917.746535	11288.8368	7965.340496	4174.854783	8577.225248	3412.484528	1451.944215	5582.357413	12784.97008	16538.45914
PI(14:0/18:3)	0	545.1370733	0	0	0	0	383.7621597	0	680.183117	460.0704863	0	0	0	0	1959.522756	537.3964757	0	0	0	0	257.7265118	0	0	0	0	840.4820614	0	251.3803511	146.1374723	0	0
PI(14:0/20:1)	346.4563162	0	0	0	0	0	0	434.2011718	0	0	0	0	601.0790799	0	0	0	0	0	0	0	0	0	0	0	0	531.5356794	0	0	0	0	0
PI(14:0/20:2)	0	0	0	0	0	573.6971576	563.3197526	582.230656	900.0642036	0	312.6901582	559.8616638	569.5209364	592.8649503	0	807.2661854	0	0	0	542.4347258	0	0	0	585.7429761	0	0	0	0	0	0	576.8740338
PI(14:0/20:3)	2470.866107	879.2425265	2110.238174	3512.12149	2521.491786	2789.563825	3529.955092	0	3461.938257	4127.357875	1465.544884	1555.266627	1308.079361	1997.410615	6173.83181	2611.478909	1897.624111	2131.465035	2296.956658	1371.13575	2910.758589	2058.416833	1984.132037	1908.257746	2422.770258	1414.304141	1880.781576	2545.676051	1450.457424	1829.326444	2161.983094
PI(14:0/20:4)	10001.45892	0	8291.087161	4990.365911	7339.615475	8620.499862	3209.703965	11489.07271	9874.360691	8669.098262	3483.007654	10235.88531	5156.853464	6625.921504	14929.16531	9368.819647	7312.136607	18166.57011	9009.541237	1886.194517	7949.629945	7783.001256	5069.926917	6237.122651	2269.940264	3639.552451	3182.742257	4601.750752	5169.898525	10747.87408	5880.592704
PI(14:0/20:5)	0	0	1374.70251	847.132668	0	0	0	1421.256608	1029.607228	1445.309287	584.8665348	569.4206196	1424.209585	1007.695275	414.340735	566.0348475	1713.895231	1955.686317	1093.20196	0	2198.197523	0	538.5003476	2274.366785	0	853.0136617	0	0	0	831.5110195	855.1763393
PI(14:0/22:4)	0	0	0	1123.870208	562.9451994	822.6468569	2086.786416	1800.530786	598.3333673	0	0	0	1293.570477	0	4355.842835	0	842.0397339	1650.375644	1641.884605	0	1092.376396	1633.411558	2186.969103	1165.730781	0	0	0	2036.028564	0	535.6345744	2269.324548
PI(14:0/22:5)	0	0	0	0	563.2742676	784.4708107	2231.497391	0	1661.70916	1617.623424	0	0	1138.406282	535.6669577	1496.575434	2115.412166	652.335793	1560.519952	1363.93338	0	817.8319716	664.8245454	590.4762751	1711.555754	0	0	576.0968594	0	553.7055532	0	0
PI(14:0/22:6)	822.7102312	0	0	0	0	810.3023249	0	555.2440852	269.6605539	704.1872158	0	0	138.074759	0	263.9740305	604.9413443	0	0	0	0	0	0	0	0	0	0	0	0	0	1312.844199	0
PI(16:0/14:0)	0	0	0	0	0	0	0	857.9540378	0	0	0	834.6243409	0	0	903.6304367	605.9394419	0	0	0	0	0	0	0	0	0	0	0	0	0	0	0
PI(16:0/16:0)	565.653646	0	0	969.9350904	0	1037.336157	1045.397642	904.2996617	0	2171.572837	1990.364907	1534.970179	852.6991763	0	0	848.399197	991.2931447	2594.549432	499.4710978	1054.029864	0	0	0	0	0	1565.177748	0	0	0	0	1512.655442
PI(16:0/16:1)	1030.132308	0	1372.277867	1032.906382	2102.457108	1467.94534	0	0	0	2132.853478	2616.616553	2538.445948	0	0	1046.267877	1582.347082	2384.444416	2224.992936	1426.347747	0	2539.535548	1242.113322	0	0	0	0	0	0	0	1185.402024	0
PI(16:0/18:0)	0	0	2081.174843	951.161893	2241.816305	3403.017859	3258.380123	1917.98893	2465.079734	1406.021216	4911.595894	1787.635088	7092.285188	3062.119847	4279.264581	1476.186743	3111.751049	4564.54548	0	0	3633.720276	941.8970601	1602.744311	2229.474394	0	1537.522131	0	3165.167636	1258.959025	4045.482392	3296.079296
PI(16:0/18:1)	2758.183976	2632.763671	8787.227809	3822.662026	5313.660154	12718.65093	799.4058472	1505.010343	0	1546.611737	5280.084548	5037.238295	2066.675143	1050.622774	1085.337026	1407.78861	8041.792591	1547.463992	4896.955051	3492.764711	10749.6795	9996.582873	3364.066221	1466.621176	6539.742929	1000.860646	1052.086301	994.9068109	4296.906653	1227.898759	2007.095863
PI(16:0/18:2)	6782.673329	1420.750886	4549.708619	4040.834736	15687.49495	10337.85444	2857.449433	1553.905621	2084.590767	2454.310696	4939.089727	2560.709158	2541.67148	0	0	2238.224672	4046.694685	7773.134014	10548.79037	1957.839688	29905.39059	8076.453477	8051.349292	5746.445098	7013.464705	2075.217868	0	3516.009296	6483.142196	5542.52083	3098.414131
PI(16:0/18:3)	303962.8972	32563.90333	631259.0005	316472.7406	476394.1634	1033937.444	211423.8904	263851.4423	233549.4348	563825.3051	177714.2462	163643.5098	313215.0637	119000.8591	735093.4702	367091.3544	416364.3072	632872.2169	716250.5293	46509.86778	817934.4994	179987.5605	154696.7241	377272.1509	60488.90394	336063.9032	252657.7389	102411.5648	166893.0499	252030.9977	480602.5231
PI(16:0/20:1)	0	0	0	0	0	2092.826167	0	0	0	0	0	0	0	1051.302579	0	1082.976562	0	1052.829189	0	0	0	0	0	0	0	0	0	0	0	0	0
PI(16:0/20:2)	0	0	0	1027.355648	0	2950.993901	0	0	0	0	0	1037.455323	1047.554426	1073.245588	0	0	1043.339016	0	0	0	0	0	0	1052.749926	0	0	0	0	0	0	0
PI(16:0/20:3)	0	0	0	0	319.9216379	0	389.6235923	250.4357488	0	3586.183093	1535.351653	0	0	0	1487.815732	0	0	1141.560288	0	383.0552308	3015.697515	404.3463963	278.5418349	415.5168205	0	0	0	0	0	1039.178611	0
PI(16:0/20:4)	12798.2405	3992.34683	3557.848595	10581.82891	25969.01363	17625.12296	6086.171003	2215.314042	1047.697835	4195.179095	4642.107082	7802.495195	5762.993455	0	0	1713.879766	4814.783792	8149.630437	7038.537973	4104.782218	20637.55286	8049.343789	6957.891492	3826.840486	2875.15617	2293.512186	996.457232	1868.840982	1580.264018	2549.227511	1032.024101
PI(16:0/20:5)	0	0	0	0	1575.292237	0	0	0	0	0	0	0	0	868.9132256	1081.487982	0	0	0	0	938.0981992	0	0	0	0	1573.302123	0	0	0	0	1542.063887	0
PI(16:0/22:4)	798.624859	0	2605.556152	0	1011.039235	0	998.0507533	0	0	0	0	0	0	0	0	953.0101465	0	0	783.5395555	0	0	0	0	0	0	0	0	0	0	0	0
PI(16:0/22:5)	1740.177466	1038.438674	0	2034.149858	2050.555181	2994.161115	1037.487228	1450.320189	928.9182998	1441.058651	2625.331857	0	0	1075.600164	0	0	1044.585715	0	0	2102.763373	1952.018022	2069.65604	2072.414335	0	0	0	0	0	0	0	0
PI(16:0/22:6)	1344.589565	0	0	0	2597.706751	0	0	0	0	0	1676.820738	0	0	0	0	0	0	2630.86932	0	0	2535.866933	0	0	2085.076882	0	0	0	0	0	1052.43451	0
PI(18:0/14:0)	0	0	231.4660494	0	236.554424	370.8522536	0	0	0	321.4791589	170.2954414	0	0	441.6283541	0	262.1203074	0	0	319.8743042	0	529.1560097	0	348.6459849	0	0	0	0	0	0	382.5508872	0
PI(18:0/16:1)	0	0	1444.688289	999.3899889	4702.004923	1577.773964	1049.604717	0	0	1996.982485	2061.857032	3645.445261	0	0	0	2165.320875	2083.64953	0	1696.318919	1054.53764	1795.89943	2704.599511	0	0	0	0	0	0	0	0	0
PI(18:0/18:0)	1680.631527	1041.564019	6950.224143	2809.40679	6936.488672	1318.423885	7734.898296	3437.28713	4037.676419	0	1482.460525	4710.341924	1666.751244	2931.184333	3768.361514	1440.832925	2987.211995	13193.11461	12620.17756	0	3610.173841	7611.116434	5711.477639	2479.881207	0	2316.989085	0	1013.548474	2091.060403	0	2557.92434
PI(18:0/18:1)	4743.200437	4719.938482	3631.196858	3641.972535	6003.370562	4071.65421	5136.449554	1549.537796	1565.883476	3316.232145	7653.873149	4991.588622	5116.514322	2542.053334	0	0	4123.996931	7908.987793	7158.594483	1516.77115	13675.37637	4237.801825	9743.011859	3514.501638	1925.104223	0	0	0	883.4135651	4581.979943	0
PI(18:0/18:2)	8966.030398	1075.861485	9846.03185	23967.69557	19138.1546	35826.80193	27033.1731	945.9587445	1060.716244	2267.205247	3219.212588	12950.30114	6235.800723	5841.536004	2687.691237	6486.740667	11411.47591	8284.801058	29072.40045	5661.209743	11037.22363	30375.75658	1973.592566	10110.84868	8274.517975	4196.838	1882.665097	1403.440129	646.4748674	9297.869601	1684.601849
PI(18:0/18:3)	0	0	0	0	1438.720088	0	0	0	1078.85635	1290.798704	0	1017.351974	0	0	0	0	942.850751	0	0	0	2103.880627	1053.52292	0	0	1053.772494	0	0	0	0	0	0
PI(18:0/20:0)	496240.3948	36664.78675	553909.2789	477121.3861	774259.1871	419594.4346	419307.8821	352164.2289	378677.9277	581146.6715	295141.6249	435435.5863	313326.4177	193926.1459	442699.0047	464758.2291	413023.4815	288865.8746	521463.4502	28537.5489	600441.3665	443753.6113	301489.1045	570560.9383	10839.59582	462738.6006	234772.1115	113673.8179	166728.3201	443227.1759	119950.5632
PI(18:0/20:1)	0	0	0	0	0	0	0	0	0	0	0	0	0	0	0	0	0	0	0	0	0	0	0	0	0	0	0	0	0	0	0
PI(18:0/20:2)	0	0	0	2010.25877	0	0	0	0	0	0	818.8901618	1572.700782	670.8342026	0	0	0	1854.94332	0	0	0	1798.921257	2078.266917	0	2605.327962	0	0	0	0	0	0	0
PI(18:0/20:3)	6407.634905	4276.187832	7148.206716	17335.38895	13631.07103	11802.47496	2942.230226	4172.925925	1568.725011	1062.499787	5707.286449	2138.784311	0	1739.751529	1536.428082	2157.544798	6971.488027	7490.123472	7514.856255	2469.472919	34412.16269	6063.593039	3139.350888	7443.666604	2293.678186	0	0	0	1251.326953	2224.118549	0
PI(18:0/20:4)	19776.96569	32797.81028	59413.07774	134022.7529	61050.54677	76046.2446	27154.1039	14009.00397	0	7419.970648	17146.80408	81530.18467	34867.93761	10903.0844	6170.337424	8227.230104	29258.63917	54397.79469	24949.00644	17334.58132	89326.82156	124777.2158	118231.1822	33167.8007	11163.97803	2561.037542	2996.480656	5291.528342	3762.407189	7694.772894	5090.402803
PI(18:0/20:5)	0	0	1395.152127	0	0	354.6149111	975.9646106	575.0523319	270.8016736	0	0	0	0	467.6324717	419.263551	433.1285281	0	0	600.6962515	0	312.5353949	245.890219	0	0	0	0	0	0	0	0	0
PI(18:0/22:4)	0	1043.488445	1851.292094	1316.121844	2377.981755	3110.658611	1042.335289	0	0	1056.850557	0	0	2104.752429	772.1832046	0	0	2057.462691	2588.837077	1563.600219	0	2094.071291	0	1904.040327	1042.143335	1010.172916	0	0	0	0	0	948.3621143
PI(18:0/22:5)	0	0	0	1009.856949	3195.028649	1280.944492	1573.894258	0	0	1527.601462	2498.036851	0	1505.356824	0	0	2281.546725	0	2657.451151	1512.117716	0	778.5338104	0	2830.064305	0	0	0	0	0	0	0	0
PI(18:0/22:6)	0	0	1026.897891	0	4360.335766	7903.706178	0	0	0	1581.450294	1039.189871	2082.754087	0	727.6132261	0	1618.785868	1322.906014	0	1313.128024	0	3197.920511	3328.351031	3981.214075	2043.68618	1027.791965	0	0	0	0	947.6364572	0
PI(18:1/16:1)	0	996.748681	1842.566521	0	3895.114958	3149.618458	906.6729685	1961.208796	0	4121.187386	1251.75797	1041.492396	1407.700652	0	1446.168956	1453.517985	2434.699285	1021.182061	2663.005381	1449.197869	1040.620098	1272.046659	742.2959989	942.8495241	0	0	0	0	1566.846045	1011.760491	2916.401121
PI(18:1/18:1)	3072.857327	1394.349881	7188.084747	5576.579408	5753.66996	4087.681769	1635.826685	0	0	1844.157865	1632.372932	3650.811004	2628.59667	1926.147107	1451.017609	2302.697185	5161.879633	6120.285542	2712.256556	0	3860.731301	3204.194769	4932.964691	2614.274989	2101.590902	0	0	1593.528045	988.1836509	0	2247.179795
PI(18:1/18:2)	2041.594265	3762.255626	7072.848651	6732.907128	4433.617332	5813.338486	2821.952422	3233.195102	1554.021484	1977.378576	946.85317	0	7197.951351	3376.892798	0	1941.259485	3585.247768	4560.222456	8753.377205	0	3690.985162	2705.3868	2754.964418	2354.681537	5178.528732	0	2386.097786	0	3204.165928	2754.205022	0
PI(18:1/18:3)	372.1417552	0	0	0	0	0	0	0	0	0	201.573015	0	0	1615.919151	0	0	269.7736809	0	0	0	0	0	0	246.7632635	0	0	0	0	0	0	764.8368837
PI(18:1/20:1)	0	0	0	427.3012884	222.3458858	387.9362999	0	0	0	211.2168389	0	0	0	0	0	0	0	352.4949859	0	0	0	0	0	0	0	0	189.7161039	0	0	0	0
PI(18:1/20:2)	0	0	0	793.6368974	605.5598344	0	0	0	0	421.0357696	172.8705771	0	0	0	0	0	0	486.6712752	237.9013871	0	231.7971843	0	0	356.4756977	0	0	0	0	0	753.2276295	328.7262482
PI(18:1/20:3)	7443.902149	1710.380952	2452.066232	7828.308997	3859.521828	4421.999426	8451.345525	6297.720901	1479.469234	3359.770465	5546.066736	566.1852229	1256.972126	1414.990796	2071.114499	4227.221992	3480.645674	7261.052354	6146.040251	734.0946505	6781.586156	3296.073439	2802.248475	5216.113372	1705.223477	5173.872899	2492.899414	2298.106245	1355.590399	1834.588294	3807.1317
PI(18:1/20:4)	7765.246338	2041.980721	5805.581818	4592.293503	6416.275008	14572.59677	3400.417734	1321.988002	3303.248811	1211.722497	4426.757168	6271.726458	6634.201453	5514.270299	0	5339.253949	4968.088913	7244.646239	8435.650556	1645.786999	7516.573688	11277.30112	4828.971832	7996.181079	1226.272782	3857.598484	2853.797537	2205.459787	2866.156499	6066.471304	6421.407807
PI(18:1/20:5)	0	0	321.1684754	0	287.1030406	278.5358051	0	245.0861768	303.0768648	157.7814217	231.2297292	0	290.2035933	0	630.9705172	383.5375029	642.8763101	321.3170563	293.8353038	0	399.9555615	0	190.9340888	318.9947569	252.8738551	0	177.8388581	0	497.8319757	0	250.9009468
PI(18:1/22:4)	0	0	0	1479.051126	0	0	0	1023.893771	1628.710894	995.9102014	0	0	2051.204823	0	842.3123312	453.1537235	0	2584.986547	994.3163382	0	1491.261757	0	0	0	0	1023.375596	0	2055.040328	0	3097.177886	929.7547697
PI(18:1/22:5)	2661.029124	0	909.1937494	1850.286057	2138.049958	856.6220638	2559.275104	2382.821798	0	3907.193798	1614.422834	1389.607669	1400.180433	0	0	1073.682879	2342.703734	2438.305625	1604.546266	0	1192.457796	1003.482194	2444.373765	1587.777993	0	833.942895	388.1591064	484.3493298	605.6831799	817.5456165	321.5814128
PI(18:1/22:6)	0	0	1247.791258	1946.757449	2086.026549	2158.696584	2124.935703	894.032614	576.2744865	1950.091136	0	3521.400402	873.1478624	2944.582414	1731.695919	1482.045685	2240.316956	4656.421581	3060.982667	0	3996.393273	0	1587.45266	3375.639272	0	0	556.2540699	0	1709.003697	4072.390097	1207.194847
PI(18:2/16:1)	155787.8925	19463.40221	277919.872	302578.7635	235890.2553	325148.5408	219153.6865	154024.3481	294263.0476	201385.0206	166972.4839	171228.4542	213957.9847	170621.429	217946.0885	156483.1047	182991.2394	303943.8089	351211.1823	27176.2229	293900.244	178653.0925	197138.9139	236934.2252	29824.29581	170248.6596	132288.7553	89619.70331	139013.5638	264490.044	206423.0562
PI(18:2/18:2)	2335.655029	2503.623413	3720.77327	8405.825191	4431.159965	11054.76005	6211.428233	6414.052724	4280.687646	8408.662899	4966.465284	5081.274946	18379.00795	6417.861632	7020.50115	0	6078.596651	7525.17596	20972.20474	0	13085.40097	2385.560514	7087.130227	5579.781871	2510.913082	505.4437378	2106.737858	0	4188.871996	0	3261.197931
PI(18:2/18:3)	0	0	0	0	336.2342227	195.8188281	243.8442398	207.6351057	0	319.7584394	0	0	0	181.9074672	275.9066208	208.3819282	0	285.0217055	195.829495	0	496.2884976	0	0	0	0	0	0	0	0	0	176.1445984
PI(18:2/20:1)	0	0	196.6756907	0	0	304.4341681	0	0	205.6573531	325.6359867	0	0	332.0891714	212.072757	491.6160305	297.7008272	0	0	188.2621833	0	0	460.4173167	0	0	0	0	165.9510665	0	218.9063567	206.3101711	486.9592474
PI(18:2/20:2)	187.4953102	0	0	0	0	245.8480196	173.3160139	337.2101684	418.3075387	157.016994	0	0	0	0	0	0	453.9157367	0	442.8218842	0	0	248.6600952	0	326.0168692	332.834576	0	0	0	0	0	0
PI(18:2/20:3)	0	1127.086511	590.5925208	999.1995615	1347.698661	2776.542366	1918.565233	1869.209351	3548.880855	1074.005255	722.7874446	1196.823814	1311.201508	0	6186.24314	982.8582198	972.3746586	829.2838355	1226.314208	697.413069	1594.716806	1339.535849	804.2197535	1890.717464	544.1649555	2260.977501	488.8014462	622.6870027	1527.854469	1193.598194	1985.584767
PI(18:2/20:4)	9709.123252	1493.852751	19741.23871	17223.35975	10311.15668	17310.16961	10072.19323	7769.497703	19623.47194	13796.39552	5956.489241	19433.51702	24244.28972	12906.98262	23296.00829	14959.02474	31343.95613	67573.4405	17794.24609	3730.002833	27855.63541	16499.03188	12890.25729	15434.6963	0	5637.103004	6023.736576	7108.135434	7767.554448	19011.37129	10405.16804
PI(18:2/20:5)	0	0	0	0	444.3321962	267.4493591	0	0	590.344086	0	0	0	0	0	0	1185.941703	0	0	0	0	0	387.7033521	730.3055484	0	347.7644199	0	0	0	494.6109699	0	0
PI(18:2/22:4)	0	0	0	580.9017911	0	0	0	0	815.31103	2243.296985	553.0986448	0	0	599.6934153	2349.838807	1499.280218	0	0	0	0	0	0	0	0	0	1448.266092	0	0	0	881.1410118	866.3545095
PI(18:2/22:5)	1254.55507	184.8252666	374.2271318	538.6664937	894.5116495	1210.053099	1018.89805	718.4222113	2369.631035	0	0	393.7289667	879.1521383	1343.236117	4326.833313	3246.763671	1359.250706	0	1172.517141	904.2517069	188.3322492	0	425.2226303	1788.410623	959.1218057	557.1894197	490.2832181	741.4809527	293.1717032	1120.417596	0
PI(18:2/22:6)	1530.047796	0	1820.75759	1370.898282	3023.3982	2716.91956	0	1128.68031	1399.47367	1314.126516	1347.857924	1954.551149	0	0	1437.867269	0	3363.122733	3537.76987	1866.12268	0	2193.459763	551.6517776	603.8153665	1931.95851	0	0	1670.92698	0	0	1131.347906	2352.297922
PI(20:0/16:1)	1268.983971	544.9649073	4729.259786	5439.720405	9046.60346	1630.474904	3389.450529	4235.953561	3849.252541	7380.41079	3729.556267	8336.880089	2502.221252	2712.954679	4139.125151	3787.60804	5493.074857	3472.0063	7385.068687	1099.523433	10124.46275	4179.630099	1072.803828	3718.830849	822.6291131	4885.120494	2193.392822	3664.564757	2056.450548	3214.060863	875.9315681
PI(20:0/18:1)	23392.96843	4864.125836	61297.2431	63522.75335	88742.24409	41439.27666	78265.10496	33332.96153	43542.17851	42499.03032	21285.37612	73222.96358	50163.14508	26192.58913	42949.95146	57438.76491	65542.13337	29007.48439	67139.71883	3699.806436	88610.58809	48487.64728	30924.6955	38849.89839	1355.668447	36758.03863	21781.737	17812.21434	20272.61388	60570.34642	21282.66596
PI(20:0/18:2)	9760.032983	1453.93829	14098.49169	15005.37755	15037.18296	14981.35778	8869.297735	7837.273872	15451.51742	16979.51978	6983.444222	6876.880378	13581.07835	8960.293236	13661.1637	13870.34852	15201.62064	9971.659275	35663.51474	0	23735.3879	8065.302719	4857.025438	9061.912916	1342.194641	6065.070399	6422.142667	1387.369403	6661.073286	19905.09205	8815.731243
PI(20:0/18:3)	0	0	0	0	0	0	0	0	0	0	863.0293975	0	0	0	0	909.2093034	543.8029091	0	0	0	0	0	590.6429941	549.2300439	0	0	0	0	0	802.6606899	0
PI(20:0/20:1)	0	0	3476.767094	4309.44096	3032.475447	2279.175007	5938.926333	1227.826324	2320.630769	2537.855066	2843.935781	7525.602071	2066.032764	1478.382761	2024.963362	2348.597847	5106.816049	1254.474341	2958.280306	0	7423.399882	1154.678863	6202.645334	3294.606299	0	3061.911205	0	0	2699.182751	2086.357599	0
PI(20:0/20:2)	1058.204148	0	1802.745373	1824.517003	1371.908871	733.0854624	1058.599445	598.0097473	1158.291656	4778.832922	0	1727.031052	1156.744537	1185.777951	410.1660579	0	550.2192316	1125.534748	4201.190189	0	2759.92524	553.4048426	1851.557697	1110.003585	0	0	0	0	859.9044865	2094.6483	1471.343874
PI(20:0/20:3)	2160.197654	0	929.4690523	2257.325298	2557.235317	1337.228147	746.9518651	2301.929637	1147.670944	4105.415437	0	2049.2688	879.4448791	2553.08171	2247.769489	6220.568161	1416.190061	3542.554534	1317.254354	635.4965355	1925.616406	847.2816382	0	2031.740156	1310.923546	746.8019384	858.7589694	0	449.6972805	1762.465334	0
PI(20:0/20:4)	6006.532535	0	9937.803937	6356.386979	15357.30697	3379.864413	4334.819626	3742.188691	4161.563881	9375.144639	4270.376945	5194.286263	3735.385494	6383.376418	5753.544246	4660.73415	6202.604716	6424.898183	9880.040994	0	3551.922718	4004.379681	0	2206.813253	0	3633.408875	1299.411141	658.9471203	2088.007485	6073.307833	5799.325314
PI(20:0/20:5)	0	555.3018658	0	0	0	0	629.7180219	0	887.2815922	1441.023725	0	0	0	0	0	0	547.9781046	559.8457369	0	0	1328.24525	577.3555755	0	0	0	0	0	0	0	0	0
PI(20:0/22:5)	0	0	784.0237634	0	0	1133.844574	1631.853067	0	0	0	0	677.9472661	911.475474	0	1355.847343	0	0	0	534.3526395	0	0	1079.124729	0	739.0234165	0	0	0	950.4995396	0	989.7173722	0
PI(20:0/22:6)	0	0	545.5584943	535.5075527	0	1110.681902	0	0	0	0	0	0	0	0	980.9418248	0	0	0	911.1951912	0	0	0	0	0	0	585.3919757	0	0	0	0	0
PS(14:0/14:0)	0	0	0	0	0	0	0	0	0	0	0	0	0	1178.730813	0	601.6745849	589.1150225	0	0	0	0	0	0	0	0	854.3858381	0	0	0	0	0
PS(14:0/18:1)	809.5501495	0	461.1242351	0	247.3470663	0	556.9716968	756.9758001	2725.569712	788.6090351	143.4815141	447.1370246	244.8714889	906.7422883	5448.787464	0	1061.449318	654.46789	524.2509777	160.706778	793.8408249	635.0800477	538.9414138	0	0	814.4923762	0	0	301.504733	667.7848864	0
PS(14:0/18:2)	2890.666226	0	6388.012422	3536.533414	2048.422619	6077.140554	3803.289015	6569.112208	6056.035525	1323.241079	589.8927235	0	4098.922865	1784.927582	4829.724904	1509.073629	1727.284909	5033.634526	12213.66536	0	7964.647738	886.9406413	1631.680814	2949.386035	0	2912.531716	1178.218477	585.0321372	2651.078653	2623.124061	5546.385181
PS(14:0/18:3)	0	549.9885007	0	0	0	533.7382699	0	0	1014.637938	0	364.7773706	0	0	0	519.3994662	0	0	0	0	0	0	0	0	0	0	0	0	789.8715727	0	0	564.7415291
PS(14:0/20:1)	0	0	0	0	0	1452.998865	0	0	0	0	0	0	0	0	0	0	0	0	0	0	0	0	0	0	0	0	0	0	0	0	0
PS(14:0/20:2)	0	0	0	0	0	0	586.4917542	0	0	0	0	0	0	0	0	1041.364411	0	593.119857	0	0	0	0	0	0	0	0	0	0	0	0	0
PS(14:0/20:3)	2060.139181	1012.187697	2874.166494	1008.323909	1015.518241	0	0	1020.201254	1044.44434	0	0	0	1212.59895	0	1046.776105	1596.74207	912.3097847	0	2043.799199	0	0	0	2023.091024	0	0	0	0	0	0	0	2047.710264
PS(14:0/20:4)	2420.786346	3632.29689	9592.424027	5981.284875	8851.654454	3478.513977	7737.034577	9756.809057	10291.56826	9024.854705	8139.437602	2786.253503	6040.828731	7601.897579	6489.148583	7322.973078	5603.72966	11083.03993	5057.730212	3034.681425	5570.119144	9903.533607	4132.770869	2389.670364	3861.786217	4599.766013	2835.246808	4412.331101	6041.700032	3574.913035	2392.766157
PS(14:0/20:5)	0	0	0	0	0	0	1039.700658	1561.311105	0	1555.284299	1004.688523	2023.595969	1529.043982	0	0	0	1042.869912	0	2060.792396	0	2037.819041	1012.949096	0	0	0	1026.976318	0	0	0	0	835.8136408
PS(14:0/22:4)	0	0	2565.327623	3547.632679	1022.626826	0	2594.713906	1511.327088	1373.126949	0	909.0146497	3051.240929	1001.485339	1046.209722	3093.057313	1569.674369	1519.278725	3465.317826	2055.023644	0	2061.628464	4063.765124	0	0	1002.427083	0	0	0	2029.336044	0	0
PS(14:0/22:5)	0	0	0	0	0	0	479.7582273	339.0506228	1087.455868	0	0	0	214.965366	1303.665736	2165.861363	3269.600995	0	0	325.0238083	0	0	0	0	0	0	690.60501	0	216.5184703	0	0	0
PS(14:0/22:6)	0	1929.584697	0	0	0	0	0	0	0	0	0	0	0	0	0	0	0	0	1298.314861	0	1474.687306	2581.088908	2327.808993	2209.167339	0	1467.102178	0	0	0	0	0
PS(16:0/14:0)	0	0	0	0	0	0	0	0	0	0	0	0	0	0	1088.303953	0	0	0	0	0	0	0	0	1053.034085	0	0	0	0	0	0	0
PS(16:0/16:0)	561.311282	0	0	1726.713898	519.5306426	0	1152.911648	0	1177.196915	3176.849669	855.8425548	1160.231751	0	900.6891106	3309.829431	0	1559.371941	522.6829327	1287.399302	0	1530.2758	419.7561032	0	0	527.1403925	567.8128837	0	688.589884	0	512.338008	0
PS(16:0/16:1)	0	0	0	0	0	0	0	0	0	874.2748555	0	0	568.8685696	0	0	1770.588378	0	0	0	0	868.155046	0	0	0	0	0	0	587.5587776	590.2840671	0	0
PS(16:0/18:0)	21204.50126	4059.87573	12030.67963	19797.94658	34786.79816	13424.72459	14262.49413	4066.235556	10468.11301	13909.90066	14338.4284	4249.958554	14019.04674	11045.43444	40577.34439	10415.50821	8524.687626	10691.15698	17205.98082	5748.664206	38655.85302	12892.00812	6090.812722	29986.85387	1042.823366	4112.873324	4767.71282	4199.485697	2862.521841	11040.67325	29907.06624
PS(16:0/18:1)	1612.879958	1050.04596	5389.853499	2392.309749	4057.896079	2617.551338	2451.792971	3538.665588	7361.903351	1466.030067	2828.237153	6344.18584	1793.067179	4190.949177	4553.318764	1864.892311	1051.15262	3998.894587	12887.85818	0	4035.82481	1545.436864	2634.676334	0	0	1542.051154	0	1847.724901	2458.884517	4061.998861	5587.40111
PS(16:0/18:2)	1569.865458	0	2242.843686	3095.844661	0	2034.859737	1873.392315	0	0	2396.069201	5410.906811	0	3301.45855	3203.488026	6402.527712	0	2195.914642	4025.344305	2009.105101	0	5438.641931	1493.337746	2013.937773	1532.733812	1514.502123	2026.873606	1771.902966	996.806527	2490.152061	2328.951199	4028.450776
PS(16:0/18:3)	0	0	987.3626172	0	0	860.9865352	0	0	1227.621567	0	0	576.3961735	0	0	1025.895976	1222.957821	0	0	0	0	0	0	0	1843.563669	0	0	0	0	0	0	0
PS(16:0/20:1)	1926.001263	0	0	1113.559898	0	0	0	1409.795767	4182.336746	1517.937371	1502.968006	0	1334.305837	1560.437661	0	0	0	817.5503576	0	0	0	0	0	0	0	0	0	0	1004.88017	0	1021.729894
PS(16:0/20:2)	981.5273226	0	0	0	0	0	0	0	1585.583838	0	0	0	1052.705716	0	0	0	0	0	0	0	0	0	0	0	0	0	0	0	1264.145692	0	0
PS(16:0/20:3)	0	0	1974.292052	993.6325239	2853.12136	0	1047.136554	0	0	0	1033.826473	0	2525.271273	0	0	0	0	0	2321.069396	0	0	1043.816503	1041.966036	0	0	929.2690708	0	0	0	0	1552.099288
PS(16:0/20:4)	2595.1896	1126.409611	19332.29602	9567.638206	12585.94636	6223.34942	3086.138469	5740.038046	7620.124244	9078.830975	11605.9521	8227.996576	14136.72465	9197.916339	16889.4392	6703.502669	6963.561204	19329.17818	14824.81084	0	10836.89315	8006.366103	2083.337046	7819.664851	5203.666915	2766.03641	3601.894223	0	3096.604753	1750.984125	11335.66901
PS(16:0/20:5)	0	0	1498.399211	1019.950409	1550.490541	0	0	2575.817921	0	0	0	0	1528.856241	1590.576745	1848.525507	0	1550.413635	4155.63613	1380.870721	1455.737069	942.2487793	0	0	0	1044.829943	0	1026.73471	0	1527.027335	0	0
PS(16:0/22:4)	1030.132308	0	0	2347.118649	976.9796255	0	1029.2501	1035.088583	3617.004988	2154.774146	0	0	1079.566802	0	768.0615025	0	0	1067.199442	0	0	1020.232032	0	0	0	0	1547.267479	0	0	0	1224.946171	1555.87627
PS(16:0/22:5)	0	0	1710.884718	1533.259155	3168.745669	2089.106787	0	1562.121662	1580.853389	0	4071.494874	0	1785.338345	0	2615.259075	0	1522.872877	2145.581194	1910.088772	0	1516.890129	734.7881234	1541.998793	1785.690866	1502.825457	979.3769182	1815.777443	0	0	1619.952479	395.3106214
PS(16:0/22:6)	0	0	0	0	0	1276.179629	0	1015.390005	0	2089.824165	1578.413153	0	0	1531.442945	2775.770622	1226.771898	0	0	0	0	0	0	1106.361869	1233.855223	0	1028.876404	1030.407199	1799.123466	0	0	2560.591377
PS(18:0/14:0)	1547.566851	0	0	0	9074.338146	0	2062.419474	0	0	3495.819288	0	1511.273766	1505.18484	0	1569.950717	3737.471518	1016.104739	0	1501.973946	0	1521.893024	1008.684422	2529.931116	2031.385717	0	1536.440136	996.9206271	0	1494.707102	0	1535.194104
PS(18:0/16:1)	1950.543628	1027.092541	2557.123151	5140.941328	15056.33991	2610.549383	5573.410115	1025.666121	1962.129663	9024.198415	1709.240936	2224.49589	3181.162723	2062.39737	2613.593288	2469.821121	7322.603542	3050.6976	3863.497067	1039.964062	6891.123163	4887.362908	1036.069819	9944.610637	0	6159.430347	1997.244512	4472.483259	3262.443725	1558.286865	481.0584217
PS(18:0/18:0)	353211.4891	128291.7646	485497.8507	697091.2793	1408939.276	162587.2561	467508.5733	358362.2561	599141.8031	900565.5113	590810.6548	607332.8289	607860.8539	257595.987	564646.9071	381500.4932	861340.3139	226086.7199	412721.4731	56999.78601	460458.1782	833736.1273	1093285.899	1125843	28291.67976	865117.0652	337987.7991	297934.1267	254545.7111	258953.9129	176753.7211
PS(18:0/18:1)	32008.78098	7299.786041	57405.94521	133676.0148	214837.0427	17157.41982	68300.07949	29251.56297	71474.85686	92182.15226	46623.10711	115355.8945	86097.83639	31154.49655	64439.14436	60312.3918	161118.5728	26587.70114	61836.28028	10411.29222	83014.48462	72131.25565	81288.87296	69537.39766	10425.22571	84380.14547	30863.83899	56694.07533	38860.09055	39130.57279	19305.54818
PS(18:0/18:2)	14124.41751	4147.573801	11899.29375	15298.37926	22269.15673	12595.60486	14382.74888	6800.638785	18254.78375	15848.80877	6225.699173	12239.83783	12686.24706	15031.76369	11965.8405	12472.74247	10960.69875	10480.34304	24322.76804	4161.514469	30612.46726	7764.998396	8164.096525	14991.0087	3065.746222	10543.2254	9110.813277	2687.33143	9720.400339	14242.29936	7341.814147
PS(18:0/18:3)	2726.050294	1762.20236	1004.423273	725.5901631	1432.725583	1420.697967	3883.766953	1507.881108	2079.609137	1349.040659	2969.511084	1012.739937	2449.16252	4037.490916	3151.97028	1673.335882	761.0245098	1533.006098	1243.684555	1772.370688	2823.103631	1315.047575	1329.024709	1466.262115	1729.175557	1625.917714	1970.177002	751.1139774	1624.797769	2094.623648	1860.168916
PS(18:0/20:0)	65968.23693	3437.455255	44653.38018	60054.13477	88594.24286	43149.00082	23070.57114	23384.08006	28003.52822	111478.8493	28636.0815	40578.33842	35686.28293	12208.92969	31996.51372	24064.73656	28580.28925	53304.31019	51372.79363	7191.235975	59405.35539	41943.64989	17404.3917	59815.56252	3496.384061	24827.24269	13602.8282	25086.95546	36884.02297	21171.86586	17591.36953
PS(18:0/20:1)	1558.950253	0	5213.96305	4689.353246	3129.16788	1564.571494	6251.827403	0	5099.774977	5181.257166	2598.78579	4094.794512	5175.155296	2602.427827	1049.609457	0	3648.466552	4171.627971	1817.499473	0	5211.891883	3641.34644	4539.702628	5213.523567	1013.992003	4145.369636	2067.739833	1550.708347	2076.317864	1858.403711	0
PS(18:0/20:2)	1047.190337	0	3126.859754	2441.674301	0	1044.159048	0	0	3647.999991	0	0	4134.24717	3259.122776	0	1044.506748	0	4164.765954	783.6656671	4692.55001	0	1563.391666	1043.488603	3646.681421	4162.358514	0	0	0	2047.104716	2071.188772	1042.783764	1034.918972
PS(18:0/20:3)	464712.9801	259326.0429	594945.1426	522415.4369	509772.1083	598697.3733	594999.9442	107462.2106	280582.1918	223399.5987	230227.6267	233209.7308	663615.6201	165379.8936	334185.5259	133398.8133	356684.8799	509251.9548	571029.4305	326932.8657	419791.8384	366709.6844	364099.6247	554779.8656	253977.565	153516.894	150427.1962	226645.589	268449.411	636240.8633	159047.6715
PS(18:0/20:4)	10231.51086	5221.479318	16529.50384	12090.09574	28300.91167	21253.08407	5079.14064	11908.46952	11685.82372	4555.709897	14061.72371	13581.52088	31733.2751	13579.41097	15141.17935	12234.31641	7792.72816	19725.30078	21690.50235	0	21957.26259	16098.33014	5619.668898	9019.316279	1795.816647	4604.909266	3975.13644	12511.45955	6748.986719	15150.35738	8017.137686
PS(18:0/20:5)	0	3020.788646	1747.734628	1811.171307	1098.901129	1248.09154	1013.624903	1005.820964	2578.050516	1103.094871	1155.929432	1168.504356	0	261.182987	2502.009897	1480.817024	1499.802329	1426.09492	956.9714753	0	2238.810168	2386.644458	3037.353633	3312.101147	0	847.5300589	833.2851967	1648.291694	918.811547	629.9267782	0
PS(18:0/22:4)	1952.955358	787.7034866	3574.509151	2294.703815	2536.451835	1527.768476	1684.26877	840.0363034	835.2913761	2078.626821	3135.12394	2839.886173	1760.983242	1440.626307	0	2352.157433	1621.843557	3114.343673	3088.022235	1258.38751	1197.120176	1444.966415	3078.7284	2555.77185	1661.511457	1275.403109	1182.878356	2465.721421	1497.406738	1455.272728	822.8545963
PS(18:0/22:5)	41925.80453	27884.04401	56414.30547	47950.80759	75837.18446	36096.25992	35097.05495	23417.31898	42452.97469	30151.24541	22349.35225	47459.09555	43586.4607	24211.32532	30152.13302	18977.53088	52536.15836	67097.77915	60317.40963	21561.75176	31061.6148	57282.1855	39453.68354	63172.36074	61735.2114	32056.53618	18395.27879	35987.57159	51517.78659	42455.6167	26841.51543
PS(18:0/22:6)	939.5575962	0	2577.745454	1868.99287	3129.952731	0	1503.266349	0	1263.168664	2076.612951	0	1566.481012	5546.61754	3149.127297	1058.846203	0	2086.507909	3638.529759	4382.422137	1020.152857	2630.171258	0	0	2606.490777	0	1031.922478	1521.370485	0	0	1038.443182	0
PS(18:1/16:1)	5044.523458	2940.203454	10172.15523	7810.716626	10034.10413	7876.315344	8201.98391	4322.268671	10240.06493	12224.3163	9424.569325	9158.798343	9332.733074	4928.062607	5749.438954	11001.88181	7671.618617	15056.72594	6853.305213	1459.211993	6755.652582	3513.539497	1470.179928	4103.443925	3230.421743	2453.466863	3927.226796	2932.226967	5151.694661	1965.8725	13252.31617
PS(18:1/18:1)	3821.200584	0	2588.020853	5692.61704	7286.597738	6462.643937	2584.254956	3603.003355	7778.305817	8600.209543	1418.973751	2906.205409	12741.43304	1507.378816	6042.751863	3025.577062	2591.373104	6746.477019	8880.804234	0	5142.197616	9850.644499	3136.440011	2620.418295	4059.471259	2063.2048	5309.761889	0	983.9374599	5138.911789	7437.323658
PS(18:1/18:2)	7504.108152	0	4525.037461	11170.71399	21901.57288	23062.24336	4962.521234	11524.10829	7556.83299	12110.9451	10562.99863	6566.900498	17742.0984	14524.72414	14836.20925	19920.83394	13299.14031	20839.56106	24466.74501	1409.029186	21971.8562	11676.2264	5158.291266	4556.769753	6022.910576	1154.081326	3158.851847	1049.952339	4210.680258	5796.423431	14903.59602
PS(18:1/18:3)	0	0	0	0	0	0	0	0	0	0	401.6646145	0	0	831.9536011	0	0	0	0	0	0	0	0	0	0	0	0	0	0	0	0	0
PS(18:1/20:1)	0	0	0	0	0	1563.042791	0	1030.351952	0	0	0	0	0	0	0	0	1452.734803	0	0	0	0	0	0	0	0	0	0	0	0	0	1029.993619
PS(18:1/20:2)	0	0	0	0	0	0	0	1034.723234	0	0	0	0	0	0	0	0	1010.459868	0	0	0	1040.436808	0	0	0	0	0	0	0	0	0	0
PS(18:1/20:3)	1655.139501	1564.450442	1488.731823	2550.339078	4512.649951	0	3649.812007	2589.342171	6073.263997	3945.631912	1486.806859	2247.171165	8809.938213	4491.177516	4400.080711	2575.698935	1797.59243	2039.008923	8341.321168	0	4301.778106	4320.982023	0	1310.507642	1017.28901	1014.496276	1819.044657	0	0	1044.758118	1810.915785
PS(18:1/20:4)	25867.70853	5197.37103	52088.62967	41245.73637	51435.50136	31567.08636	15260.60991	42754.1711	38250.54581	49545.73171	40660.04541	44765.7467	63911.82875	35762.54666	67137.6754	47349.26556	36168.19166	54003.96125	74281.15685	5735.827959	64926.85839	44668.03108	10265.48861	24973.77867	10336.16168	15387.3646	6119.055459	16446.95492	25612.68548	29667.64388	38728.73067
PS(18:1/20:5)	1530.452915	1015.671677	2605.28248	949.3465893	3128.234285	1565.97567	1044.170595	1405.533485	2081.027211	5211.080095	0	1533.330078	1545.977301	2083.983881	7315.397231	0	1561.577154	1030.454609	5431.537925	0	4171.28548	2587.441691	0	3124.545514	1548.308265	2591.737087	0	997.2454592	0	1406.681387	2598.175411
PS(18:1/22:4)	0	0	0	0	1025.982428	0	0	4668.30205	5179.002153	6238.495241	2653.904144	0	0	0	4404.043117	1048.150915	1492.239736	0	0	0	1132.72431	988.3455773	0	0	0	499.1890691	0	0	972.239543	0	4142.811048
PS(18:1/22:5)	2610.579423	1031.093287	1513.355928	4480.529636	2960.92301	1562.54461	2607.495564	1030.29591	3364.968587	0	5342.437084	1004.272429	13989.61822	1708.628907	7406.501342	1974.691832	3849.31051	6778.826302	3181.853589	1555.698109	7288.388633	1529.433648	0	5094.556803	5743.840773	1813.223815	0	0	1069.494364	1739.971222	3180.802049
PS(18:1/22:6)	5067.408737	0	3115.116686	8628.363875	11847.54412	6243.502733	1203.314837	2519.004846	5252.1394	8366.780058	3481.340602	1779.404383	8285.324421	2449.003479	12788.90709	8522.938233	9831.177237	3130.745821	13705.15499	0	11541.37645	4677.332137	4110.487438	5543.021176	0	4677.649702	0	0	2328.43033	6290.034373	5200.675118
PS(18:2/16:1)	10632.89909	2775.105638	11624.01844	13538.4852	18817.05874	17187.47202	7510.478023	14223.5366	11710.04665	14710.87116	21933.70174	29163.09464	20293.85883	16070.92845	30494.64823	15711.82086	27324.92975	23989.19673	26305.55081	3639.023081	35173.35661	16886.08185	14402.18801	13413.66444	11208.12373	19130.10273	7153.559531	6323.116889	10787.75243	6953.79872	22074.68265
PS(18:2/18:2)	35371.54398	2071.70982	58010.54367	47966.17648	61484.36583	55785.69448	31034.07525	18520.84158	19949.22639	17032.08995	17934.10862	24397.13425	33709.50868	40572.11655	35109.84422	23373.02092	32222.04257	24730.51519	42249.94022	2596.774941	41693.56257	24881.26516	17713.51645	17735.87073	16956.28279	16163.46854	10790.59047	8770.699546	17259.67134	23213.50317	42248.10072
PS(18:2/18:3)	0	0	0	0	0	0	0	0	0	0	0	0	0	0	1755.655452	523.9700439	0	0	0	0	0	0	0	0	0	0	0	0	0	0	0
PS(18:2/20:1)	595.543245	0	0	566.4776558	0	0	0	0	0	0	0	0	0	0	2114.811235	0	0	0	0	0	0	556.829931	556.0588849	0	0	0	0	0	0	0	0
PS(18:2/20:2)	0	0	0	584.5057961	0	0	0	0	592.5449594	0	589.8869035	587.0798001	0	0	0	907.9216772	0	0	0	0	0	0	0	0	0	0	0	0	0	589.0772759	0
PS(18:2/20:3)	15942.35962	0	8715.422961	7407.099804	14725.45909	6856.959009	7840.127775	2718.925197	4430.804675	5597.436684	3358.963878	8161.657333	8901.386878	6979.029111	15305.136	1838.621062	5010.773583	8033.573601	15415.39902	1040.700205	8147.584955	4823.651734	2603.916867	2720.015663	3145.574149	3508.904601	2475.418748	0	4705.457624	7424.985432	3970.726754
PS(18:2/20:4)	54245.74901	5120.319302	136043.9709	55087.39785	134865.2616	40760.48355	29075.29341	26378.52335	34051.74097	27392.73997	65001.58975	92376.15521	79895.34704	36185.80399	90549.01137	40274.18269	34322.26283	105364.9238	92944.18268	17386.69519	50188.10776	68189.72795	21868.79076	20187.39074	38016.15125	34851.74082	19886.79629	49162.61775	23325.34783	51924.06398	25842.48013
PS(18:2/20:5)	4565.791111	0	4204.126786	2623.573103	9365.445808	1053.915385	3146.945004	1004.857288	3147.883023	8487.793683	0	2095.547981	1526.043172	1041.364472	8339.85086	2633.80315	1928.167258	1051.836553	4037.762748	0	3168.47833	1046.421521	0	1016.917997	1562.892172	0	1016.135849	0	0	1012.024075	1560.095796
PS(18:2/22:4)	2304.493908	0	5007.525367	5499.836035	5215.422756	5539.494423	1943.768348	3895.742503	5627.120481	3636.17743	1162.340022	1360.422432	8397.708497	1561.754095	2078.86259	2018.673621	5669.036378	11529.85798	4520.746932	0	4940.035636	7505.077395	2498.51011	3255.073873	1909.853717	3421.561314	990.3577358	1978.581623	2041.253286	2056.677786	2168.687424
PS(18:2/22:5)	1855.99067	1517.015253	4988.427267	7086.660685	4285.069707	9204.769619	4513.105628	2741.032702	1227.92932	3661.593054	2227.885774	0	940.6103603	1781.078995	9488.80982	2245.005083	5059.765224	7128.661931	7078.712426	1510.28572	9094.269136	2895.903776	1505.818951	10620.94868	1656.889105	1685.920228	1966.995391	1489.959702	0	2027.309888	3062.53754
PS(18:2/22:6)	4313.787948	2101.826063	5093.082947	8411.026614	12742.27289	6934.126163	4036.310612	1600.864361	2904.938035	1339.43242	4682.614379	2026.809527	2663.444339	8008.896364	8187.15743	10586.51074	8796.942862	3752.23115	12847.94576	1552.58893	12672.05049	5519.60817	2237.733207	5419.97122	1042.147557	1560.434589	2510.402675	2517.030393	1284.02753	1795.644116	2384.254476
PS(20:0/16:1)	29807.86717	4380.764279	26221.31697	45039.30825	106281.4605	15238.53313	19359.10684	27895.8564	27116.96157	114792.7255	20538.97141	48457.93959	15225.39074	2704.001504	55920.34199	24974.26673	36223.39843	25505.27007	34714.77286	11098.00103	92591.97735	17579.10097	9097.817295	24117.76135	3852.25572	36342.41545	6783.077778	18134.78743	26714.1981	15851.26421	14303.82197
PS(20:0/18:1)	3924.093256	0	4482.200959	8557.140785	9871.240141	2100.350924	3440.611182	5896.939184	7946.742763	2881.525659	6011.424698	1004.301454	3105.167511	3439.935624	4556.746314	3707.140465	7614.545024	7419.532688	10864.12291	1559.660451	6583.932441	8043.022027	7935.82467	7564.454871	3015.67572	7996.05945	1565.849273	4501.809123	2878.693683	3781.586596	6744.208452
PS(20:0/18:2)	256137.4404	39065.91181	543096.3804	720034.283	682061.9912	385077.8808	469073.9646	400923.7441	494302.4244	300577.4069	248281.7255	609902.8522	393892.6489	213963.2239	400406.596	267900.6714	449055.6069	316460.6804	688496.0096	53098.69841	774829.7928	348219.8064	189554.3581	264143.3669	64897.71065	399610.7556	159543.6401	195651.6612	344032.8018	357742.2122	280189.5644
PS(20:0/18:3)	3892.862747	591.4200149	13100.91796	7255.658769	18483.86283	9228.043435	4090.020853	3329.410254	6057.611444	14173.73153	3860.504124	7990.946604	8673.063571	3797.776186	4517.780768	3316.943539	3828.978083	11273.93118	14580.33385	4015.212911	22721.94772	1848.408809	1745.639106	5170.44295	866.7240042	6646.744361	5595.990776	6147.195773	3920.642713	6560.726008	10354.67338
PS(20:0/20:1)	1212.231011	0	4200.285032	4551.956649	4027.450241	0	2328.35057	2283.166403	220.2363805	1454.847373	579.1319235	4537.59629	2335.606791	0	2705.056925	1818.204387	2583.150029	1313.625818	2816.210659	1902.825898	1362.606923	3154.936636	1396.813613	1718.89956	1131.248365	0	866.2325663	866.9092233	1443.214897	2819.631466	2294.284297
PS(20:0/20:2)	5765.054225	845.8403913	11064.25651	13702.1827	13132.52079	9979.003805	7532.631569	10192.59818	10844.25403	5542.343774	8296.592466	14817.08501	8712.337004	2050.239958	10210.80638	6054.953621	8976.915118	9011.873064	14339.92663	808.8606912	20846.7566	7804.979077	5711.346195	6432.06447	1927.129792	5751.686244	2036.788411	2602.345009	10645.3936	8872.63945	7969.585772
PS(20:0/20:3)	32008.24588	3717.345525	42182.09428	49904.35102	97030.82818	26987.98193	28802.81618	49802.29513	26557.38168	77657.93759	30086.97447	67655.98937	26517.24912	3634.665707	61191.56747	36536.10085	37454.70892	41073.13255	23155.72132	7076.357969	55558.23917	31119.48236	11209.67651	28158.10159	7427.119603	40656.07812	16633.89761	27261.90798	41887.57609	13350.21303	17040.3876
PS(20:0/20:4)	66460.64204	5331.525055	136218.831	171502.2211	263955.4266	87633.551	59502.04526	110550.7933	94164.55107	151333.4021	93160.69138	158758.6851	93996.69498	63915.0698	191429.2448	78349.25996	104636.8898	95782.99864	128936.3279	20092.46522	125518.1029	121017.0628	43548.52494	77292.11437	15479.86073	81088.96759	43157.16459	62582.25369	71839.91248	52530.51849	60974.09941
PS(20:0/20:5)	4443.852632	0	3835.70088	4431.273577	13339.32658	3041.708374	3619.591806	2878.162359	6816.375493	15772.40754	1591.732253	1659.706381	1560.509867	1513.35909	7694.409017	1813.35908	2442.79803	6614.850563	4904.955498	890.9994222	8607.960589	3116.281721	2176.407071	2878.394108	0	1708.409076	3175.32153	874.858579	2702.685286	3473.307659	1321.679542
PS(20:0/22:4)	5579.836299	660.4859703	9193.65102	7206.898598	7500.926925	6500.662955	4654.317258	7638.813591	7116.571181	4297.455609	3538.603834	7344.556856	5890.144579	3876.248128	11617.41834	4529.618517	6570.132756	6207.997791	6993.660475	2047.709489	9747.575419	3605.285695	2210.206299	5464.177472	0	6518.375702	1452.428549	3273.214435	3696.465746	3765.197252	3413.140442
PS(20:0/22:5)	4321.25459	641.1869889	13880.7104	16398.33741	22162.78891	14050.59079	8929.053244	9955.875917	10702.96668	10006.11218	5892.422695	11383.35101	11793.69154	4409.671153	10735.63171	3456.539611	9164.98972	6998.552195	10194.08546	3533.522829	26032.36265	7087.325756	3930.404439	8831.691828	0	10879.49868	6177.500775	2934.347522	7694.05361	8935.527623	7128.095951
PS(20:0/22:6)	11942.30441	733.8082816	17756.07264	30531.83663	47803.10962	16007.40532	25168.78836	13394.18597	11315.43521	24908.89323	6700.484556	31869.78981	10643.32409	3406.757676	19293.84328	6143.526626	23392.47097	6561.44035	38977.06757	1290.766214	51190.81215	18862.51652	7137.283553	18285.39966	1901.521146	17803.69443	13373.12704	6393.613159	13491.98496	18450.83168	7780.771054
27 OH cholesterol	0	0	2.362506594	0	0	0	0	0	0	2.746931026	3.212760891	0	4.02491	2.137617327	1.606187922	0	0	0	0	0	0	0	0	0	0	0	0	0	0	0	0
Cholesterol	9952.552796	9943.199083	9929.472306	9959.288893	9967.458332	9946.212477	9921.517935	9967.761124	9929.565717	9954.867518	9955.206549	9932.597845	9963.213487	9964.696693	9970.967553	9976.575607	9958.912676	9938.020562	9948.836136	9934.866618	9890.742326	9947.666335	9840.653264	9954.640734	9970.946478	9951.555621	9955.615646	9934.244771	9940.587819	9902.138941	9939.731735
MAG 16:0	0	0	0	0	0	0	0	0	2.59055401	0	0	0	0	0	0	0	0	0	1.836741191	0	0	0	0	0	0	0	0	0	0	0	0
MAG 16:1	5.575625959	5.168181223	4.688742649	10.94862172	2.35044692	1.989927675	2.842938201	4.791691494	4.829323592	0	3.776441739	7.644246921	0	3.886866581	1.177688156	0	8.180087325	8.573570148	3.835589902	6.55085922	7.722332288	3.009390267	8.383243523	1.61255883	3.281283009	2.667054247	12.97021906	3.634729935	0	7.425873024	5.941094753
MAG 18:0	3.299950116	9.868031061	0	1.545408207	2.135572542	1.881442501	4.457460005	2.568184565	2.838475479	2.794333708	7.182441223	8.057407918	0	0	4.358309298	0	1.509465751	0	1.340790113	4.995027414	14.21079734	0	7.87366174	0	3.454935198	2.435319464	2.556920722	0	14.44731538	0	14.11556595
MAG 18:1	6.213085135	6.00381836	14.98966963	3.170670304	6.99187435	24.49010048	6.487756127	1.945664679	13.17668665	5.248497811	4.084287252	6.929110921	4.869025258	1.986388618	1.995453998	3.152628498	15.38190077	24.43170518	13.40984514	2.800482157	16.26378737	10.15465673	20.17442493	16.52917773	8.032847438	8.290247301	7.170287503	9.167459437	0	28.8870664	6.257614139
MAG 18:2	4.725984573	10.34626529	5.372286141	4.349032771	4.567287181	0.825384083	7.410947011	2.21249631	3.883430976	1.892397697	0	3.885591202	4.02776843	6.349511369	1.302664378	1.540495897	0	1.909629618	2.821866217	2.223233407	6.392790636	0	1.256176873	0	0	0	0	0	0	12.40627598	11.27093682
MAG 20:0	1.732275949	0	10.18166342	1.257563097	0	2.879271268	14.81304585	3.830762418	0.50716837	0	0	5.763837046	2.427384584	2.137914296	2.002482556	1.451389083	1.621933193	3.97048002	4.700595972	9.149937039	9.038135583	5.901922342	6.660036978	2.99482134	2.406142888	0	0	4.881453742	7.175293023	5.772870963	0
MAG 20:1	2.026771895	9.753957131	4.842046577	0	0	5.68820192	5.450869129	0	0	0	0	4.63540233	2.686544555	2.796894757	0	0.766169557	0	5.454721359	0	6.673866538	4.253960961	4.31525595	6.660810415	5.445746231	0	0	2.328971272	0	0	0	0
MAG 20:2	0	7.823521873	0	0	1.834808757	1.948930314	0	2.182725835	10.31989635	2.528272906	6.423024077	4.394641993	0	3.561122971	2.408069535	0	0	2.464554919	0	0	6.99743755	0	3.572500283	4.977040403	0	5.074275645	0	13.29788652	0	0	1.829873571
MAG 20:3	1.706435634	0	1.965809169	1.177599512	0	0	2.96063149	3.27569019	0	6.964704312	3.20962448	0	0	1.413064365	1.451339887	2.05817902	0	0	2.781900035	0	4.370674077	2.673332726	1.767249092	3.770599493	1.21095187	7.331908533	0	0	2.900119012	0	0
MAG 20:4	1.684257527	0	0	0	0	1.894956839	0	0	7.68176757	0	0	6.875238914	0	1.424002994	0.395802973	3.625279962	0	5.127821202	3.64851141	2.961490318	0	0	0	0	0	2.298887469	4.963142401	0	4.894664361	0	0
MAG 22:0	1.805897426	0	0	1.563439839	2.775470891	0	2.964068152	2.183295047	5.671723867	2.798510797	3.267233432	0	6.713422862	2.871113159	3.918289322	0.750691918	1.806453889	2.729552365	2.819082419	2.224322969	0	2.932310599	0	0	0	6.026695473	8.268593824	7.9517622	0	8.046425884	0
MAG 22:1	0	0	2.420479857	0	2.180240212	1.552637964	8.794047542	0	0	2.903582255	4.078586959	4.656036618	4.027463183	0	3.838139314	2.062403528	1.970732707	0	2.763913741	2.651538541	4.52045867	0	0	2.492610487	0	2.926070307	0	10.8064765	6.759280414	0	2.235580197
MAG 22:2	0	3.864839621	3.632680537	2.162150172	2.266950941	3.550167379	2.869746407	2.154459688	0	4.563596289	0	3.492818421	2.636955768	2.124002127	0	1.348313285	1.535899886	0	1.881948938	4.191248258	13.98788834	3.654895899	3.885233161	3.769161023	1.221818483	2.382363536	0	0	4.29793477	3.032683317	3.380688865
MAG 22:3	0	0	0	0	1.474776949	1.948869807	0	0	0	3.295338477	0	0	0	0	1.45133985	2.039173329	3.969533391	0	0	0	4.578583187	0	0	0	1.191298184	0	0	4.530367857	4.43019228	3.794305126	3.856099667
MAG 22:4	2.637019222	0	5.415456481	0	1.851330186	0.855990786	3.304467564	0	0	2.798358816	3.617977886	3.245325248	0	2.137534223	0	2.048133943	0	0	2.803936789	3.526448658	0	3.910468444	0	3.767550464	2.124194116	2.925924571	0	0	0	5.813122797	0
MAG 22:5	3.366535498	0	6.008467728	5.465508224	2.698904142	0	7.392425954	3.104520975	7.767414655	0	5.941073382	2.329799425	2.686544433	1.330922154	2.613134003	0	1.959584149	0	1.872527529	6.065565894	0	5.229230287	10.57752435	0	1.104076846	2.875447655	2.372153445	5.403169924	0	2.590306236	4.504680727
MAG 22:6	0	0	0	2.345976726	0	0	0	1.974284296	0.974746427	2.795675168	0	0	0	0	0	1.570479196	0	2.729552364	0	0	0	0	4.014393961	0	0	0	3.310188477	0	0	4.769674087	0
S-1-P	0	0	0	5.089078882	0	0	0	0	3.053272594	0	0	0.07461999	0	0	0	0	0	0	0	0	0	0	67.58583253	0	3.363351604	0	0.443877002	1.028622852	9.276220931	12.76042778	0
Sphingosine	12.67336474	3.97230219	8.647884786	1.636057973	1.414004799	4.281641638	8.73366173	2.01510043	7.139822464	3.802282279	0	5.418077685	2.686493538	1.146352533	0.513545685	1.011055387	3.151732705	4.587850348	4.646614289	11.11936118	16.92082849	10.55220197	16.93564865	0	1.662622836	3.210185264	0	5.053299799	5.231161318	2.562027641	6.876130499
