# Supplementary material for: Plasma Lipidomics Profiling to Identify the Biomarkers of Diagnosis and Radiotherapy Response for Advanced Non-Small-Cell Lung Cancer Patients
Source: J Lipids. 2024 Jan 27;2024:6730504. doi: 10.1155/2024/6730504 (PMC10838201; doi:10.1155/2024/6730504)
Supplement: Supplementary Materials — The original data for all analyses in this manuscript are provided in the supplementary document, according to the corresponding subgroups. The corresponding subgroups can be obtained according to the supplementary file name. [file 6730504.f1.zip › good vs bad response pre-RT group.txt]

Sample	26	27	30	31	34	37	41	43	44	45	46	50	51	54	55	56	28	29	32	33	35	36	38	39	40	42	47	48	49	52	53
Group	good response	good response	good response	good response	good response	good response	good response	good response	good response	good response	good response	good response	good response	good response	good response	good response	bad response	bad response	bad response	bad response	bad response	bad response	bad response	bad response	bad response	bad response	bad response	bad response	bad response	bad response	bad response
FFA(14:0)	0	987229.266	941655.2389	1012161.134	1144077.289	490167.8469	2363404.083	0	430777.3224	639678.9337	468712.8666	853534.1738	770517.432	0	663682.9733	1266318.902	1159860.658	980076.8027	1081619.04	1090417.981	683927.9573	2258998.576	1084827.854	1034921.149	1058562.24	0	787018.8932	97274.16233	306629.2642	488948.1716	0
FFA(14:1)	0	1036729.616	740293.7687	803661.2903	676663.9212	508486.9673	480718.3635	0	696123.7947	663175.8564	662152.1795	532365.7751	732481.3651	0	977844.246	895062.7228	702191.3662	735387.5287	646399.6903	663825.4697	319969.3438	776155.2837	924767.2538	684835.9729	787978.1157	0	443153.3474	540333.4202	697241.4864	477316.8812	0
FFA(16:0)	0	8157551.074	52589399.35	15967506.92	5147960.696	11391971.32	19779668.51	0	5331445.017	11567680.41	6902217.838	8089638.295	12519014.9	0	7748261.827	17164179.13	14996505.43	8132615.8	6196825.179	9411235.668	6387393.072	19725938.41	16112127.57	17972192.75	12681752.24	0	9658726.585	4936766.705	7098303.761	7794123.52	0
FFA(16:1)	0	270120.6257	1331064.741	1172652.464	1332751.549	1059037.701	2685817.94	0	518190.1091	1770795.346	441141.2727	1479573.592	1634767.021	0	1083717.942	1489311.347	1070427.011	471595.0224	1362795.798	1783963.315	409065.4891	3749633.905	1234129.797	1417614.603	1065961.245	0	1541823.303	704297.4966	1408008.655	603161.3088	0
FFA(16:2)	0	374236.4603	630368.9936	669449.124	740295.7581	312707.656	262839.475	0	253040.763	381804.5754	389856.2943	319704.2689	362525.3642	0	247666.9559	253682.367	749556.737	244078.6495	733350.4429	212505.3237	265501.4376	530007.7901	725534.6458	739514.091	688378.049	0	344379.6827	265850.7226	257179.4494	339807.1186	0
FFA(18:0)	0	5537799.323	25074943.88	9804256.656	3673095.831	12640886.74	6780380.409	0	4905477.679	8545885.674	7657094.317	8570835.954	17751898.06	0	8473013.692	11443545.44	5781736.172	6353916.013	5320907.262	4175697.539	10171748.02	10297397.46	9651736.465	7977366.961	6878462.812	0	7667020.336	5270841.336	6125749.435	10748375.73	0
FFA(18:1)	0	15495893.8	74183584.95	34315105.3	6341031.739	36217246.42	25527368.02	0	10973436.12	31158249.19	11588577.71	30001155.04	38259339.52	0	18952343.76	30651039.35	30482530.61	15391167.74	11851420.15	20185019.52	16835210.88	33666249.12	30088485.31	39427661.31	23845537.73	0	22932279.92	20220873.53	24649292.71	27812828.28	0
FFA(18:2)	0	9735261.771	61491967.18	17438432.77	3380162.112	21729097.88	17487779.33	0	8063669.182	16250115.07	6563879.417	14874153.68	21126636.32	0	8900745.32	18819501.85	13895338	10019101.5	8196969.873	10115461.8	9353420.065	15532286	20408998.58	22001193.53	20122901.38	0	15493438.42	11485328.01	15158384.77	18290959.88	0
FFA(18:3)	0	534062.7728	8407620.974	866580.3872	214662.48	1093459.446	996450.5494	0	443310.6965	784536.5823	326174.1303	754375.7029	1047874.837	0	771638.5446	760785.0032	526928.0543	513171.2468	823188.9262	676976.8187	569385.9638	750006.3633	1106613.045	1324728.125	1760963.189	0	903729.3291	537914.8139	803541.5412	1041070.04	0
FFA(20:0)	0	2546677.524	1909654.306	1777739.881	3028682.108	5393311.028	1501382.322	0	439949.8541	900497.0055	1839986.556	1466775.908	3056615.258	0	435789.4309	1137817.642	1416873.578	2736114.575	2562636.956	2202389.838	1727484.304	1867396.497	2644531.179	1893201.813	2250236.735	0	1883807.991	1454532.85	1972671.995	1708111.625	0
FFA(20:1)	0	268590.8971	1789470.653	1065959.571	301837.4781	1083635.253	609213.8054	0	243758.5475	473805.669	168446.2355	665001.2012	1027865.71	0	441900.6308	770729.7706	947698.1826	334840.1716	362888.4224	320790.4997	429228.9387	874088.447	1108834.449	833566.8906	363614.322	0	379435.8077	452019.9174	376017.6289	1396834.691	0
FFA(20:2)	0	201755.1238	1448705.001	514924.581	91320.55551	627650.6353	244946.5065	0	248449.3363	379142.5015	253920.5886	535756.4799	716726.3867	0	273415.9539	526249.2684	417747.4546	271133.6331	196688.9998	250402.2683	369788.0546	416711.3655	410121.4451	496387.5456	315047.7628	0	379159.7356	324737.0084	382778.9244	525958.6693	0
FFA(20:3)	0	400636.6311	1000883.121	375061.7247	435062.8532	957456.095	407468.7885	0	280785.5192	692394.9433	363944.7012	490080.5898	889267.124	0	313531.5887	442747.3933	433502.3652	511811.867	431389.8635	354071.5612	352288.3224	404957.9719	413108.5531	466667.7884	398060.4496	0	491550.2262	734139.9818	774998.1186	394316.3019	0
FFA(20:4)	0	286216.1638	2298194.949	622048.8963	352659.9558	1164199.584	371860.0645	0	603192.4842	652349.056	719190.3055	964553.5093	1112341.535	0	850695.9677	1054584.456	571516.7991	408230.7841	454973.5321	771360.9924	520668.5699	1115312.663	843933.5128	957971.8998	449920.1066	0	1718856.202	732308.4767	992124.8494	823846.079	0
FFA(20:5)	0	245807.3502	217207.782	191159.2023	218951.1539	280547.3049	215183.6174	0	264106.1737	372737.1032	1877641.388	768995.683	935375.5931	0	554267.1494	340249.7798	223727.4018	1414676.724	201348.0039	322825.3238	581929.5212	325163.2884	166264.7705	215485.303	228533.5645	0	328944.437	419529.9722	447788.8627	757552.8703	0
FFA(22:4)	0	120813.6923	955271.8917	282112.762	87168.81298	619320.7801	129445.1018	0	115887.0355	248768.3773	174054.6527	425010.9276	313092.2166	0	179103.1111	307691.4798	274484.0848	214080.203	100167.7807	284404.222	295485.5523	379626.3088	260973.381	480986.6761	173243.8959	0	256162.5305	218031.2911	242928.0671	417035.3974	0
FFA(22:5)	0	119474.7132	1219599.58	205599.6189	190579.4896	401249.9859	176812.0559	0	213352.5124	250497.2158	142793.9851	210962.7038	224516.6156	0	348884.3128	332900.1047	488654.6466	105460.616	372425.3139	286058.1739	243706.6914	320388.4578	260217.2395	541181.7409	125375.7613	0	161206.6389	199719.284	234069.4232	322367.5694	0
FFA(22:6)	0	181143.8299	1360702.704	236863.6952	132817.7968	468463.1696	254989.5786	0	156355.7325	344994.7127	206250.8314	295531.9555	330545.9298	0	168072.3281	448042.4614	209241.9959	114431.6522	1163936.713	352931.5082	342790.8578	367985.9025	248859.0563	416879.1149	98863.17628	0	279619.4413	300832.1234	166682.718	358420.1191	0
FFA(24:0)	0	15865853.4	29232515.7	3389630.66	7371918.169	17542793.76	656750.6776	0	3999343.576	16461535.1	24003312.62	17961144.3	4188302.193	0	5944274.816	11659869.39	19605826.59	7995082.123	6146509.557	20387547.24	1483344	32651160.66	11366564.95	7149391.673	11123915.57	0	4688410.407	33691148.52	10990625.91	11897645.78	0
FFA(24:1)	0	192791.7918	257841.7714	351933.5627	42377.9752	839718.8614	191027.675	0	69351.5769	132327.9651	76122.35788	443776.6285	677903.787	0	197894.9882	205724.6566	471048.2311	257143.1653	102518.6429	229562.2719	323990.9001	273007.8607	365258.9012	117325.2726	41599.75158	0	279036.7266	235349.12	332383.4742	1007092.577	0
LPA(14:0)	0	0	0	0	0	0	0	0	0	0	0	0	0	0	0	0	0	0	0	0	0	0	0	0	0	0	0	0	0	0	0
LPA(16:0)	1218.583677	5243.329808	2074.730118	0	2537.717687	1280.266653	2370.252152	1011.954837	2845.444293	0	0	1332.078512	1336.981153	1011.954837	0	1618.243746	1490.979943	1719.134426	1756.57505	1674.847509	987.221398	2326.66773	1556.142469	1229.896604	651.2544809	0	2112.233932	445.4341182	1134.626785	907.3801265	2006.979029
LPA(16:1)	0	0	0	0	0	0	0	0	0	0	0	0	0	0	0	0	0	0	0	0	0	0	0	0	0	0	0	0	0	0	495.1487392
LPA(18:0)	801.0189123	617.6490823	0	0	0	827.3816524	680.2821618	600.6263086	356.6076879	0	0	935.3607694	0	600.6263086	992.3076833	0	0	0	0	0	0	0	0	0	1484.589256	1100.672347	0	0	0	0	897.3975055
LPA(18:1)	631.2021495	0	547.4689404	0	0	822.0084722	0	0	0	0	0	0	513.5652321	0	0	0	0	821.3859477	0	0	0	411.4219262	0	0	0	0	0	0	0	0	0
LPA(18:2)	0	0	0	578.7130042	0	0	0	0	0	0	0	0	0	0	0	0	434.5072972	794.0424462	652.5732682	0	0	0	0	0	0	0	0	0	0	0	396.2770067
LPA(18:3)	0	0	0	0	0	0	0	0	0	0	415.2127133	0	0	0	0	0	0	0	0	0	0	0	0	0	0	492.2370303	0	0	0	0	0
LPA(20:0)	0	0	0	0	0	0	0	0	0	0	0	0	0	0	0	0	0	0	0	0	0	418.1059543	0	0	0	0	0	0	0	0	0
LPA(20:1)	0	0	0	0	0	0	0	0	0	0	0	0	0	0	0	0	0	0	0	0	0	0	0	0	0	0	0	0	0	0	0
LPA(20:2)	0	0	0	0	0	0	0	0	0	0	0	0	0	0	0	0	0	0	0	0	0	0	0	0	0	0	0	0	0	0	0
LPA(20:3)	0	0	0	0	0	0	0	0	0	0	0	0	0	0	355.95	0	0	0	0	0	0	0	0	0	0	0	0	0	0	0	0
LPA(20:4)	0	0	776.5522407	0	0	0	484.82758	396.2615373	0	0	0	0	0	396.2615373	0	0	0	0	0	0	0	709.1353947	0	0	0	0	0	0	0	0	0
LPA(20:5)	0	0	0	0	0	0	0	0	0	0	0	0	0	0	0	0	0	0	0	0	0	0	0	0	0	0	0	0	0	0	0
LPG(14:0)	333.4314307	0	345.802712	356.9214909	0	855.8922787	816.3331123	565.8279154	602.2022951	0	0	346.9254469	482.9246373	565.8279154	0	0	0	479.0111555	0	487.9766456	578.8690129	585.6643188	674.3347109	0	0	452.9822388	0	612.1853903	0	0	779.1338167
LPG(16:0)	6715.792036	2168.208936	2208.429127	1865.155107	4191.634344	1248.326499	6546.194167	7267.303552	1196.310005	1408.957135	790.8074216	3373.642517	620.8995317	7267.303552	831.2768411	1682.346947	4746.326421	970.1133349	1858.854363	665.5030378	1778.348166	2216.950985	3178.649339	4898.829864	3665.411425	3590.728875	3390.931495	1140.950255	2605.639569	1448.934449	2608.507578
LPG(16:1)	957.9292414	231.779038	489.7484279	363.5775227	209.0456198	647.1652918	722.521564	1335.318829	401.2075806	639.7703874	454.6316371	618.9928906	351.9617541	1335.318829	257.7504665	550.9644026	549.4625004	423.6738046	322.8677356	506.7126911	244.1106464	883.7497596	215.3181962	851.5746511	0	1192.038619	381.9469557	539.1766379	0	222.342748	0
LPG(18:0)	3183.293057	3392.957753	5279.248979	2839.029609	3156.277982	3391.784213	5367.286926	3207.305235	2072.1818	1163.985516	2558.306757	6735.428197	6092.463054	3207.305235	1976.43715	4859.297194	1627.503088	3139.639609	3698.021904	4211.960927	2374.007551	5503.206869	5866.880648	2743.09224	5273.834779	4552.119347	17331.85854	2952.836453	5338.91037	2123.670084	2276.112883
LPG(18:1)	12396.56723	15643.59205	23815.4573	16830.19692	9206.947528	11588.61323	14776.4308	25177.10586	6331.620266	11746.44503	8232.617482	23981.94147	17049.78771	25177.10586	11879.72246	16084.26181	13013.63222	19286.87124	7881.220275	11789.65231	9013.783196	14015.90524	16929.61929	18882.34414	12346.46486	12984.68404	21670.69153	11969.47429	13284.01437	8652.883625	6458.475633
LPG(18:2)	10327.70738	3736.523794	9457.372692	6290.087287	8476.223592	5549.664325	12706.05708	11087.72182	4275.31571	6668.543035	7459.747211	13755.92922	6166.169466	11087.72182	3077.000766	7217.589642	4703.665474	9292.953783	2655.095057	5081.719366	6322.668817	4862.718633	8565.384539	3832.533522	11132.32727	7857.871485	10219.55411	4007.61802	4295.881774	7096.272605	4880.182351
LPG(18:3)	1882.060485	531.2922051	747.5729899	536.9203749	338.3868649	0	449.4742464	746.5730708	996.6164802	1202.207289	882.1233826	669.3609873	0	746.5730708	866.1000322	691.4882496	209.3022926	744.695773	429.1687088	2253.484298	320.2660025	576.220075	461.803837	641.2158504	390.9495463	1117.503769	385.3243584	599.7314967	2237.728427	731.9773803	906.3768091
LPG(20:0)	539.1930841	287.2649961	493.5134539	0	221.5294298	0	0	445.042298	0	0	404.6897073	0	700.0692336	445.042298	448.156912	507.0763491	200.1648861	406.4652024	288.3873574	427.6963765	0	575.115155	0	0	298.721038	957.3608504	498.2861678	597.0850657	461.6283885	397.6900994	0
LPG(20:1)	607.9805692	0	0	0	0	1053.518547	521.6649449	301.2377304	0	0	0	0	0	301.2377304	0	0	0	0	0	1579.567941	0	0	0	1049.405121	2159.009335	1516.539694	0	0	0	0	606.3291508
LPG(20:2)	961.3391801	805.5055237	2593.741443	1078.238705	909.3356761	1172.029147	790.6952864	443.3996285	935.9027603	316.1363473	552.6483166	1398.675185	471.6061609	443.3996285	318.9647314	900.5915226	660.7140746	1474.411205	816.614338	0	378.9499693	1678.296317	1503.70298	1791.485352	1105.552664	409.2717933	649.97016	735.0165794	762.6043864	987.1022784	1200.041486
LPG(20:3)	838.9390211	333.8327004	686.1459714	426.26482	1397.161488	580.743454	760.458729	907.7147822	635.7050927	173.9515052	0	1205.151127	366.2914035	907.7147822	341.1141724	218.6004842	0	434.2890819	628.3413066	825.9442378	1520.981924	934.3750344	1467.844902	793.0695671	714.9904124	402.3290112	1310.005305	0	0	0	390.4346726
LPG(20:4)	645.0895122	1038.099245	652.7003753	0	343.8755217	242.721116	322.6205119	1035.957535	0	496.8495654	0	0	319.5149998	1035.957535	0	184.9097142	430.3196355	645.7521265	247.3348856	241.2722594	0	0	327.7923607	434.8821425	514.2681623	0	929.9819187	0	405.3148969	0	848.8038309
LPG(20:5)	1005.193156	790.4445021	526.4222867	253.0528833	362.3035205	471.6336645	1162.854822	529.9773698	190.8130344	0	292.049673	387.7961985	253.0733316	529.9773698	422.2840175	936.9813271	188.8871792	500.7881459	454.8662302	626.2755636	0	742.2808838	331.0147881	440.3755674	340.6860418	793.6151601	0	715.4588832	839.1768959	797.0771031	445.1880434
LPG(22:4)	504.7649379	369.1134957	353.2480327	524.9308746	522.4680221	295.5006208	257.4325577	779.8106074	464.9485965	266.4002285	475.0252559	531.718581	379.1599585	779.8106074	343.8506369	431.5621512	259.0973249	305.895357	417.8649176	680.1217917	0	0	528.4543859	394.7081541	321.378915	908.7734571	499.8085893	0	539.1676985	560.0775682	527.9312876
LPG(22:5)	621.5459223	996.1441059	1312.678935	828.6352518	1015.291077	1527.002402	657.4404359	0	361.4974382	288.8479975	287.6766071	479.0834901	477.1540082	0	401.1396309	740.9943212	921.0195624	741.8336965	636.6206998	1534.328434	0	631.8826771	827.0250611	574.785353	1399.659648	0	446.4132872	620.1703925	657.9820641	0	0
LPG(22:6)	621.9055824	602.1930444	829.4104015	496.0484388	502.9463936	781.3804931	794.7478727	0	0	0	709.2606879	517.043123	0	0	134.3115579	443.6492326	500.2657914	363.538378	469.856287	585.3980179	0	480.4639668	824.2081545	0	727.8310022	0	511.0803394	0	364.0935092	481.1441913	1158.881481
LPI(14:0)	0	0	0	0	0	0	0	0	0	0	0	0	0	0	0	0	0	0	0	0	0	0	0	0	0	0	0	0	0	0	0
LPI(16:0)	1636.504279	0	0	0	0	0	888.4125317	2021.054318	0	0	0	0	0	2021.054318	0	0	0	0	0	0	0	1190.402964	0	0	0	0	0	0	0	0	1181.269411
LPI(16:1)	0	0	0	0	0	0	0	0	0	0	0	0	0	0	0	0	0	322.8966904	0	0	0	0	0	0	0	0	0	0	0	0	541.3435555
LPI(18:0)	0	0	0	0	0	0	0	0	0	0	0	0	0	0	0	0	0	0	0	0	0	0	0	0	0	0	0	0	0	0	0
LPI(18:1)	0	0	0	0	0	0	0	594.5744833	0	0	0	0	328.9608081	594.5744833	0	0	0	0	0	0	0	0	0	0	0	0	0	0	0	0	0
LPI(18:2)	837.8383111	0	0	0	0	0	0	501.7012826	0	0	0	0	0	501.7012826	0	0	0	0	0	0	0	0	0	956.9366625	0	502.7118999	0	0	0	0	0
LPI(18:3)	0	0	0	0	0	0	0	396.0669053	0	0	0	0	0	396.0669053	0	0	0	0	0	0	0	0	0	0	0	0	0	0	0	0	0
LPI(20:0)	0	0	0	0	0	0	0	0	0	0	0	0	0	0	0	0	0	0	0	0	0	0	0	0	0	0	0	0	0	0	0
LPI(20:1)	618.469155	0	0	0	0	0	0	0	0	0	0	0	0	0	0	0	0	0	0	0	0	0	0	0	0	0	0	0	0	0	0
LPI(20:2)	0	0	0	0	0	0	0	0	0	0	0	0	0	0	0	0	0	0	0	0	0	0	0	0	0	306.6824899	0	0	0	0	0
LPI(20:3)	0	0	0	0	0	0	0	0	0	0	0	0	0	0	0	0	0	0	0	0	0	0	0	0	0	0	0	0	0	0	0
LPI(20:4)	505.308203	0	0	0	0	0	358.1394552	277.9896609	0	0	0	0	0	277.9896609	0	0	0	0	0	0	0	0	0	0	0	0	0	0	0	0	0
LPI(20:5)	613.5703688	0	0	0	0	0	0	613.546762	0	0	0	0	0	613.546762	0	0	0	0	0	0	0	0	0	0	0	0	0	0	0	0	0
LPI(22:4)	387.209428	0	0	0	0	0	0	0	0	0	0	0	0	0	0	0	0	0	0	0	0	0	0	0	0	0	0	0	0	0	0
LPI(22:5)	0	0	0	0	0	0	0	0	0	0	0	0	0	0	408.8642981	0	0	0	0	0	0	0	0	574.0103902	0	0	0	0	0	0	704.6600959
LPI(22:6)	0	0	0	0	0	0	0	0	0	0	0	0	0	0	0	0	0	0	0	0	0	0	0	0	0	0	0	0	0	0	0
LPS(14:0)	0	0	0	0	0	0	0	500.5213018	0	0	0	0	0	500.5213018	0	0	584.8156109	0	0	0	0	0	0	0	0	602.4873378	0	0	0	0	600.2641974
LPS(16:0)	1042.117002	2458.807711	2904.809519	1918.637084	1743.205907	2505.618212	2274.725278	512.2162433	1760.396347	0	1237.114326	1229.532481	2128.991152	512.2162433	1386.530313	1751.328868	826.8604516	1615.152741	2572.128511	963.8801149	1142.087562	2270.461309	1844.877708	3490.396478	1483.299027	0	2574.721737	567.2826705	1850.799687	1572.695376	995.1893063
LPS(16:1)	0	0	0	0	0	0	0	0	0	0	0	0	0	0	0	0	0	0	0	0	0	0	0	0	0	0	0	0	0	0	0
LPS(18:0)	1317.346642	723.0689803	1327.367605	0	0	1359.302071	687.1468255	0	991.9926313	0	0	525.5998829	0	0	512.2261039	0	0	727.4697683	1067.669855	0	0	837.2341863	878.0773705	0	883.7069783	1005.510294	0	0	0	627.3110836	1358.228836
LPS(18:1)	488.728252	0	0	0	0	812.0746304	0	858.0743311	0	0	406.7729409	0	0	858.0743311	0	0	0	0	0	0	0	0	0	0	0	669.0566141	0	0	0	0	384.7960303
LPS(18:2)	0	0	0	0	480.4538259	0	0	345.0422678	0	0	0	0	0	345.0422678	0	547.9054235	0	0	0	0	0	915.3527616	0	0	1193.507923	0	0	0	362.7626509	0	0
LPS(18:3)	0	0	0	0	0	0	0	0	0	0	0	0	0	0	0	0	0	0	0	0	0	0	0	0	0	0	0	0	0	0	0
LPS(20:0)	0	0	0	0	0	0	0	0	0	0	0	0	0	0	0	0	0	0	0	0	0	0	0	0	0	0	0	0	0	387.4773308	0
LPS(20:1)	0	0	0	0	0	0	0	0	0	0	0	0	0	0	0	0	0	0	0	0	0	0	0	0	0	0	0	0	0	0	0
LPS(20:2)	0	0	0	0	0	0	0	0	0	0	0	0	0	0	0	0	0	0	0	0	0	0	0	0	0	0	0	0	0	0	0
LPS(20:3)	0	0	0	0	0	0	0	406.6201362	0	0	0	0	0	406.6201362	0	0	0	0	0	0	0	0	0	0	0	0	0	0	0	0	0
LPS(20:4)	0	0	0	0	0	0	0	0	0	0	0	0	0	0	0	0	0	0	0	0	0	0	0	0	0	0	0	0	0	0	0
LPS(20:5)	305.6606421	0	0	0	0	0	0	0	0	0	0	0	0	0	0	0	0	0	0	0	0	0	0	0	0	307.6391323	0	0	0	0	0
LPS(22:4)	0	423.8004545	0	0	0	317.293209	0	0	0	0	0	0	0	0	0	0	0	0	0	0	0	0	0	0	0	0	0	0	0	0	0
LPS(22:5)	0	0	0	0	0	0	0	0	0	0	0	0	0	0	0	0	0	0	0	0	0	0	0	0	0	0	0	0	0	0	406.6399996
LPS(22:6)	0	0	0	0	0	0	0	0	0	0	0	0	0	0	0	0	0	0	0	0	0	0	0	0	0	0	0	0	0	0	0
PA(14:0/14:0)	0	0	0	0	0	0	0	0	0	1012.955995	0	0	0	0	0	0	0	0	0	1049.371016	0	0	0	0	0	0	0	0	0	0	0
PA(14:0/18:1)	0	0	1048.805054	0	0	0	1518.573589	0	1000.676802	996.0398637	0	1513.160038	0	0	0	0	0	1049.529878	1049.428993	0	0	0	0	0	0	0	0	0	0	0	0
PA(14:0/18:2)	0	356.6174146	0	0	954.9149642	0	0	0	0	174.5041187	0	0	0	0	341.1264619	0	0	947.0069292	0	0	0	0	0	707.3034014	0	0	0	0	0	0	0
PA(14:0/18:3)	0	477.7270385	0	0	0	0	0	0	0	0	0	333.7811598	0	0	0	0	0	997.0305896	222.2301729	443.3849034	0	0	539.3231056	0	0	0	0	0	412.5189989	0	0
PA(14:0/20:1)	0	0	0	0	0	0	1047.401736	0	0	1128.724831	0	0	0	0	878.5187626	0	256.6847035	0	0	383.2706657	0	0	367.9514529	0	0	0	0	0	0	0	0
PA(14:0/20:2)	0	1052.751404	0	0	0	0	0	0	0	0	0	0	0	0	0	1034.26308	0	0	0	0	0	0	0	0	0	1083.394961	0	0	0	0	0
PA(14:0/20:3)	0	0	0	0	0	0	0	0	0	0	0	0	0	0	0	0	0	0	0	0	0	1580.825186	0	0	1049.522527	0	0	0	0	0	1566.454147
PA(14:0/20:4)	0	0	0	0	0	0	0	0	0	0	0	0	0	0	0	0	0	0	0	1447.633388	0	0	0	0	0	2444.020338	0	0	0	0	1048.268036
PA(14:0/20:5)	0	562.5928475	0	374.9746531	0	0	0	0	0	0	0	881.8220353	0	0	0	0	0	0	0	0	0	0	0	1462.088885	0	0	726.9446334	0	0	0	1118.823442
PA(14:0/22:4)	0	0	807.4888203	0	0	0	0	0	0	1401.911642	1430.650619	1051.592725	0	0	1051.958371	0	0	0	0	1053.241431	0	0	0	0	0	0	0	0	0	0	0
PA(14:0/22:5)	0	383.2852137	0	0	361.0500859	0	0	0	0	0	0	0	0	0	216.443496	0	0	0	556.2021968	0	0	0	0	260.2442958	357.3976084	0	208.1206879	0	0	0	0
PA(14:0/22:6)	0	0	0	0	0	0	0	1027.483842	0	0	0	0	0	1027.483842	0	0	0	0	0	0	0	0	0	0	0	0	973.2847311	0	0	0	1567.64402
PA(16:0/14:0)	0	0	0	0	0	0	0	0	0	0	0	0	0	0	0	0	0	0	0	0	0	0	0	0	0	1568.866945	0	0	0	0	0
PA(16:0/16:0)	0	0	1530.091687	0	0	0	0	2095.884823	0	1052.380485	0	0	1730.484271	2095.884823	0	1746.138451	0	0	0	0	0	1559.504873	967.9882684	0	1009.27045	1750.76792	0	0	0	0	2801.493679
PA(16:0/16:1)	1830.576422	0	0	0	0	0	981.5800678	0	0	0	0	0	0	0	0	0	1001.282546	0	0	0	0	0	971.3219237	0	0	0	0	0	0	0	1044.760088
PA(16:0/18:0)	0	0	0	0	0	0	1029.427585	0	1056.691567	1041.033464	0	0	0	0	0	0	0	0	0	0	0	0	0	1447.981276	0	1480.555784	0	0	0	0	0
PA(16:0/18:1)	1979.354668	0	0	0	0	3998.51595	0	0	1771.829926	1473.880805	0	854.5207965	0	0	1476.719282	0	0	0	0	0	0	2327.065085	1433.88613	0	0	0	1459.911088	872.891401	2020.797209	863.6466158	0
PA(16:0/18:2)	1047.380748	1008.325432	1049.410987	1043.149333	1566.933423	1518.218878	1471.344919	2673.057706	0	0	0	1516.844903	0	2673.057706	0	0	0	0	1009.364025	0	0	0	0	1529.573887	1548.726845	980.3454447	0	0	0	1009.856178	1268.731092
PA(16:0/18:3)	0	0	0	0	0	0	0	0	0	0	0	1286.857371	0	0	0	0	0	0	0	0	0	0	0	0	0	0	0	0	1576.057132	0	1086.200955
PA(16:0/20:1)	0	1472.808089	0	421.5070175	0	0	0	0	0	0	0	0	0	0	0	0	374.9730475	0	0	0	0	0	0	0	0	0	0	0	0	0	1085.178133
PA(16:0/20:2)	1592.976202	0	0	0	0	0	1030.875036	0	0	0	0	0	0	0	1050.045613	0	0	0	0	1578.333505	0	0	0	0	0	0	975.602682	0	0	0	0
PA(16:0/20:3)	0	0	0	0	0	0	1047.260035	0	0	0	0	0	0	0	0	0	0	0	0	0	0	0	0	0	0	0	0	0	0	0	0
PA(16:0/20:4)	0	0	0	0	0	0	1030.132308	0	0	1031.155524	0	1045.684344	1577.730238	0	1050.787894	0	829.3508473	1507.212323	707.1434413	0	0	755.3089028	1675.622151	936.3722568	868.8550547	0	0	0	0	0	0
PA(16:0/20:5)	0	0	0	0	0	0	0	0	0	0	0	0	0	0	0	0	0	0	0	0	1040.950374	0	0	0	0	1624.722234	0	0	0	0	0
PA(16:0/22:4)	0	0	0	0	0	0	1519.482699	0	0	0	0	949.4793683	0	0	0	0	0	0	0	0	0	0	0	0	0	1042.251913	0	0	0	0	1046.217561
PA(16:0/22:5)	0	0	0	0	0	0	0	0	0	1518.674655	0	0	0	0	1055.812852	0	0	0	0	0	0	0	0	0	1003.948918	0	0	0	0	0	0
PA(16:0/22:6)	0	2035.94492	0	0	1037.45828	0	0	0	0	0	0	0	0	0	0	1048.137447	0	0	2596.48272	0	0	0	0	1037.488165	0	0	0	0	0	1041.759713	1065.431957
PA(18:0/14:0)	444.3706304	0	0	0	1175.072346	0	0	0	0	0	0	1051.559706	0	0	0	0	748.1126784	0	0	0	0	0	0	0	0	695.4787726	0	0	0	0	0
PA(18:0/16:1)	1647.833063	6097.758224	2271.115328	1538.749378	2040.599962	1788.54717	2668.277558	1024.597458	0	2490.571356	0	2017.520549	8596.615602	1024.597458	2480.293437	3483.780943	2252.882008	2579.414544	2565.945257	5124.971508	0	3569.510277	3591.848456	2529.384512	1001.183844	5231.6444	0	7019.554242	2004.789309	1517.574274	1579.862057
PA(18:0/18:0)	2651.703913	7065.855457	4110.002427	0	1659.175821	4152.298598	0	1046.290508	3990.844441	3487.800719	0	3043.676291	2022.702123	1046.290508	1484.110015	3824.108138	3980.517132	1436.57869	3856.572973	2317.135604	0	2502.818233	4631.850379	1542.571274	2522.658271	1545.723139	1994.369684	5035.314914	1400.361252	1020.049281	2090.8404
PA(18:0/18:1)	119427.9594	226153.8166	126708.0488	67053.87824	76036.55412	88484.60285	55295.01809	51840.77599	82861.88725	49404.47909	35819.23903	127272.6495	194332.2349	51840.77599	52109.39012	88938.47658	76395.04532	95714.63179	126281.1113	101780.1146	16904.90074	78713.17716	188027.125	75360.06688	64582.29607	113609.6296	38642.04421	154173.1368	75723.63748	32134.02305	75748.97169
PA(18:0/18:2)	142168.9126	338615.58	177835.2738	90520.28778	126324.1726	171602.0025	97800.23104	233473.317	255448.8974	57715.12114	101901.1068	306471.2868	248615.5618	233473.317	101473.5291	162645.3982	86575.13798	161816.9181	204336.2507	60764.91405	60426.70363	39685.49285	138075.8417	102352.2499	215057.443	73220.83883	105287.5433	106545.9585	113619.3952	77522.72736	79126.40969
PA(18:0/18:3)	1467.894293	3063.759732	0	0	0	2525.446627	1030.132308	3140.279713	5490.476721	1495.096067	1565.848753	0	5063.625248	3140.279713	994.9642926	0	1543.77019	1013.917374	4120.337736	1520.38965	0	0	1491.503858	1543.116926	4114.745051	3137.759762	996.9230904	1513.899498	3851.702174	1027.983877	4195.580522
PA(18:0/20:0)	2611.925672	10746.25762	2416.975515	5176.006675	1928.88412	1604.024451	2951.890255	5006.070986	2067.373696	2551.923729	0	2400.923557	4435.13314	5006.070986	1362.880883	2011.302976	1540.181905	2568.271881	2669.568713	2529.255131	0	3049.560561	1522.717324	2585.255396	932.0338235	3656.933722	2034.819235	1011.090855	1000.08821	2064.0203	4314.937195
PA(18:0/20:1)	4735.288494	9421.323741	7078.685646	5167.957683	0	2053.546805	1791.074214	1567.769865	4529.052607	1006.028382	1006.223032	5654.065206	4627.665315	1567.769865	1001.797066	2410.758124	2576.913725	3535.055501	1033.000806	6671.806621	0	1526.987639	7226.106208	3055.240231	0	2614.280266	1013.449962	7663.338523	5580.783599	2589.41651	2520.861733
PA(18:0/20:2)	2661.913698	9760.263187	6724.074199	1029.993618	0	3071.905123	2543.560683	4698.248944	11050.83291	0	3552.82743	5122.212532	3558.896798	4698.248944	1997.981242	2424.271991	2585.014462	2017.955206	6048.813393	1563.227327	2570.315302	0	0	4130.255953	1439.092315	3136.046026	1684.668723	2537.150035	0	0	1593.471214
PA(18:0/20:3)	53866.23042	142254.2838	56918.72422	34710.7101	34963.02674	46822.22029	25253.1798	39707.31977	54354.12107	21161.58744	33722.97488	98561.57739	70835.19611	39707.31977	31377.38699	64264.94894	34202.92626	53641.56739	67834.84304	40364.97589	12442.79037	26144.93722	98921.27345	51757.37303	52325.07117	55041.06474	21987.46988	57569.1587	29942.8521	12847.58852	27662.82307
PA(18:0/20:4)	839429.7973	1621038.135	778014.5708	343924.4246	469777.2702	642130.8063	249292.0391	366840.4729	673186.2615	321127.6731	331517.4688	761246.7618	1063105.655	366840.4729	376056.2458	620062.9997	381206.2336	531038.8116	784621.2018	678875.882	126750.8472	460143.1008	1453060.361	600744.9273	498063.4113	788038.0967	297317.1287	883664.761	474194.726	144185.4044	466321.226
PA(18:0/20:5)	11454.81138	28643.9934	4098.80204	4672.641964	13483.59084	9321.232946	5163.434819	22921.77857	17964.63035	2047.863034	4871.037064	9760.794258	9362.260727	22921.77857	4106.578701	9712.822	1554.119929	8810.291455	34253.4624	6232.882957	1562.058723	10869.03449	6750.452062	19427.2041	5184.832277	4162.743425	0	6200.079538	2582.295975	2083.172794	5213.85252
PA(18:0/22:4)	196274.7157	406356.4478	297131.9291	75811.90458	90786.69792	153231.7574	62515.29976	37039.87247	107457.1391	84333.18655	63841.64496	111024.5977	327768.5993	37039.87247	103534.3531	122920.0793	142324.6717	227061.5751	85846.1655	297480.7959	19080.02711	215436.2319	488231.9836	104338.6358	137121.7759	320954.1286	52137.07679	345391.3218	132287.3412	15434.04748	65627.72922
PA(18:0/22:5)	125785.2855	221752.236	123218.3995	51726.48415	68807.60342	74507.59111	44741.64849	79814.47175	87822.69094	29861.4126	48421.94104	82370.85188	188456.9581	79814.47175	68102.70676	72797.26716	39981.96884	93249.19658	110492.8784	90333.73705	19255.60637	65603.85211	209934.7232	93048.77585	119409.312	120086.8599	35436.61971	144294.396	74850.52047	32288.60696	62636.47336
PA(18:0/22:6)	75513.10785	117990.194	64993.72045	49935.58042	52879.76529	67731.71245	40540.64674	62701.59809	81335.94702	39454.24152	25947.58924	61064.56387	78663.06919	62701.59809	28367.99406	56961.44803	50911.48993	40494.29215	111569.2206	46692.54334	10949.98325	47244.63137	76759.57109	72859.46693	44720.91821	48752.11326	19755.17128	45705.9918	54862.43632	23462.40668	65480.94941
PA(18:1/16:1)	1676.027553	0	2080.522359	0	0	0	0	0	0	0	0	0	0	0	0	0	0	0	1026.685963	0	1922.44097	1032.159009	1543.142283	0	0	0	0	0	0	0	0
PA(18:1/18:1)	2539.357673	1568.081245	1468.113585	0	2054.502121	2021.828562	0	0	1850.667207	0	1026.544164	1121.161441	1513.910618	0	0	657.1755087	1030.248872	988.4767389	1565.300589	0	0	1038.616597	0	3594.85079	999.3678351	3114.212247	0	1556.474923	2732.331093	0	0
PA(18:1/18:2)	1585.222819	3145.854006	0	1542.643507	2571.09752	0	958.7072516	1635.394331	2457.320792	1997.753134	0	0	2527.594167	1635.394331	0	2498.27852	1026.687441	1512.503617	1308.047867	1006.97763	0	0	3048.1779	5142.600382	2520.384979	0	1015.177375	0	0	0	2623.059003
PA(18:1/18:3)	0	0	0	0	0	0	0	0	0	0	0	0	0	0	0	0	0	0	0	0	0	0	382.2106276	0	0	0	0	0	0	0	1045.228302
PA(18:1/20:1)	0	0	0	0	0	0	1039.875425	0	0	0	0	0	0	0	0	0	0	0	0	0	0	1498.763306	0	0	0	0	0	0	0	0	0
PA(18:1/20:2)	0	0	0	0	0	0	0	0	0	0	0	0	0	0	0	0	0	0	0	0	0	0	0	0	0	0	0	0	0	0	0
PA(18:1/20:3)	0	0	0	0	1573.459548	1036.352653	0	1047.567451	0	1537.198422	0	1022.694453	0	1047.567451	1056.318723	1038.992988	0	0	1037.259431	0	0	0	0	0	0	1081.165825	0	0	0	0	0
PA(18:1/20:4)	9671.38631	8816.665334	2074.467465	2076.588789	5696.604496	6760.507314	2586.087539	2087.26909	7193.743343	0	2072.606582	5213.183523	2083.940973	2087.26909	1534.576717	7702.525212	1552.374625	4154.092319	3108.737208	3117.297671	1561.000068	3627.867232	3819.103615	4276.948538	0	2611.051155	0	1542.005269	0	3124.953506	0
PA(18:1/20:5)	0	0	0	0	0	0	0	0	1057.946092	0	1033.617545	0	0	0	0	0	0	0	1559.031474	0	0	0	0	0	0	0	0	992.0100818	0	1512.105455	1083.955477
PA(18:1/22:4)	3131.752425	2067.05128	0	0	0	1564.179911	0	0	1548.806009	0	0	1019.67331	1030.215247	0	2063.615831	0	0	2038.404226	0	0	0	0	1556.43662	0	0	1070.672737	0	1039.437164	0	0	1030.919486
PA(18:1/22:5)	1051.454702	0	0	0	4153.859122	0	0	0	0	0	0	0	0	0	1502.457211	0	0	0	0	1036.564919	0	0	0	1038.368449	0	0	0	0	0	0	1294.32141
PA(18:1/22:6)	1525.16685	0	0	0	3634.740642	0	987.5766199	0	0	0	0	1042.875315	3127.505478	0	0	0	1041.018031	0	1038.886861	943.4320889	0	0	0	0	0	0	0	0	0	0	0
PA(18:2/16:1)	0	0	0	259.125123	390.2900317	662.1507538	0	0	0	417.9791064	0	0	0	0	0	0	0	0	0	0	0	0	0	0	868.8660218	1601.447026	0	668.1517684	1051.471473	0	0
PA(18:2/18:2)	1093.236893	1536.58788	0	0	0	0	0	0	0	0	1041.630501	0	0	0	0	0	0	0	1036.604295	0	0	0	0	0	0	0	0	0	0	0	0
PA(18:2/18:3)	0	0	0	0	0	0	0	0	0	0	0	1037.336223	0	0	0	0	0	0	0	0	0	0	1464.34168	0	0	1085.236548	0	0	0	0	0
PA(18:2/20:1)	0	0	0	965.2975426	0	0	0	0	0	0	0	0	0	0	0	0	0	0	0	0	0	0	0	0	0	0	0	0	0	0	0
PA(18:2/20:2)	0	0	0	0	0	1198.20054	0	0	1531.134422	0	0	0	0	0	0	0	0	0	0	0	0	0	0	0	0	0	0	1013.191328	0	0	0
PA(18:2/20:3)	0	1064.701174	0	0	0	0	0	1018.645793	1027.756551	0	0	0	0	1018.645793	0	0	0	0	0	1020.083415	0	0	0	0	0	0	0	0	0	0	0
PA(18:2/20:4)	4704.068056	0	0	1374.320958	0	0	0	519.8085156	1023.551043	0	0	0	1561.417266	519.8085156	0	766.2761224	0	0	0	0	0	1039.883409	1550.353561	1030.124695	0	0	1030.090801	1511.293999	0	0	0
PA(18:2/20:5)	287.359233	0	0	1047.13043	0	0	549.3467724	397.9510064	0	1004.257932	0	0	0	397.9510064	0	0	0	0	0	0	0	0	0	1042.334458	0	0	0	0	0	0	0
PA(18:2/22:4)	0	0	0	0	0	0	0	0	0	0	0	0	0	0	0	0	0	0	0	0	0	0	0	0	0	2087.864444	0	1589.19429	0	0	1042.140173
PA(18:2/22:5)	0	0	0	0	0	0	1030.011535	0	1014.748398	1025.311407	0	0	0	0	0	0	0	0	0	0	0	0	0	0	0	0	0	0	0	0	0
PA(18:2/22:6)	0	0	1438.836272	0	0	0	0	1057.399501	0	1041.033464	0	0	0	1057.399501	1010.396983	0	0	0	0	0	0	0	0	2015.03998	1039.255616	0	0	0	0	0	0
PA(20:0/16:1)	3140.255259	14705.24623	8069.055395	1546.944031	2495.392902	5554.11849	1918.306329	2091.398921	2936.577182	2806.491014	3519.550617	16858.55497	13086.70204	2091.398921	3493.518919	2510.18038	4082.753746	8572.209238	4694.832022	16942.83633	1531.884599	11659.17474	12517.52024	4642.420884	3090.233141	15165.27846	2519.366339	7371.146526	6743.747424	0	1046.165264
PA(20:0/18:1)	88520.86969	180452.6737	87970.29499	59676.57333	75063.31253	82401.83624	31991.33734	58458.50522	136689.4854	35780.74902	30946.73517	117593.2415	171390.6325	58458.50522	49565.42432	75592.41276	74818.50632	144347.8989	121116.6882	67564.19655	10825.89799	61059.95793	128846.6817	60234.47752	94303.10231	79854.44782	42973.09176	106106.428	59624.70885	20921.90981	37979.74946
PA(20:0/18:2)	254175.2386	515576.4815	263234.0453	162597.0817	224585.0954	343313.789	206186.9683	317940.7189	338545.5113	96137.74025	149128.3938	452152.7394	430880.6519	317940.7189	191120.7465	209900.1034	156843.7035	392498.7782	410970.2323	118257.6284	69918.04396	72234.42164	248039.3242	184449.2987	277295.3184	122070.7311	170498.1977	196554.6182	157906.1887	124195.5658	139602.0706
PA(20:0/18:3)	2193.824468	7229.140975	2663.776135	1032.351479	1547.679007	5445.563902	0	4115.835625	7876.57223	3836.768466	1030.128146	2066.605065	9997.778961	4115.835625	2453.648703	2045.885648	0	6290.091712	4501.569365	3601.98251	1039.251404	0	3424.061311	2064.705684	4486.300354	1564.860234	0	2792.008365	3916.793631	2033.515261	7745.466853
PA(20:0/20:1)	942.9484244	10271.10208	3629.656025	4649.547999	1036.915789	2603.103801	0	2082.505094	2030.885499	0	0	3771.966786	4633.829955	2082.505094	1016.414959	1035.480949	1554.878665	3565.81158	2208.091949	0	0	0	3754.695905	0	1510.691002	2082.84725	1539.235313	1517.860309	0	938.4352827	1604.464006
PA(20:0/20:2)	3116.140937	2833.513685	3695.20532	2596.596677	2070.19298	4290.277934	0	4004.945321	2346.794517	1534.179849	3061.807889	1968.987321	6783.322966	4004.945321	2561.456949	2218.76808	0	3713.210156	1906.130596	1563.02088	0	2192.055882	1211.082237	0	5168.999858	4438.884196	0	4497.763781	1008.821583	2082.88927	1694.814058
PA(20:0/20:3)	98610.1686	193777.6727	75760.36774	56657.02043	64243.23256	83361.33191	33975.52086	66684.02437	84974.64252	31514.62561	40433.39966	129403.1256	104164.4962	66684.02437	50419.19991	78094.07885	34157.50126	77496.57493	93398.1131	70328.52303	11588.58998	57735.48741	112186.4682	84919.64256	60553.86789	80345.06188	39849.65152	92662.07829	45667.82808	15077.44876	58767.78012
PA(20:0/20:4)	1304835.996	2795821.544	1048526.055	520096.429	920077.7372	1068064.796	360825.7288	499311.9982	1048379.114	487397.7169	449531.3082	1228103.295	1968093.105	499311.9982	706915.6657	1233499.986	817687.4954	1126315.078	1235071.231	1129287.815	161911.406	824103.5663	2170243.475	1037930.929	810334.2582	1129489.976	499784.8031	1485590.695	962349.4863	234662.8495	802776.5005
PA(20:0/20:5)	37057.99754	69776.73062	11961.5617	8803.507897	28549.03558	27109.03397	20309.72522	35507.3687	39907.88889	8057.540617	13011.30791	11654.6455	37444.95327	35507.3687	14016.39244	15011.36206	5958.174983	37499.85417	78532.21083	19050.28131	3628.777416	16669.18404	21607.25217	48922.34646	10896.98641	9967.086892	3763.707627	17062.32914	8813.738648	10151.76509	15809.58159
PA(20:0/22:4)	223508.2474	447420.5253	224662.3671	81292.55061	70299.12952	146499.0844	30504.60674	25302.64102	100216.3951	88473.10902	58861.12565	128305.7628	345233.4286	25302.64102	109128.8087	148012.9676	158095.5125	193355.0946	61392.48185	303073.1851	14826.88499	173076.2415	517897.063	55206.31449	127157.9638	248782.9161	36926.02279	365719.0585	165071.4738	26626.82765	78963.9047
PA(20:0/22:5)	146372.5551	213654.8455	106717.0382	35004.39797	62188.12022	90859.91511	19630.77775	57845.46263	85380.9675	40812.03339	32248.52807	70644.31277	209039.4355	57845.46263	63637.31832	94407.14049	38042.6145	106287.1156	102988.6644	50488.59454	16178.19449	60413.42658	233716.9732	60009.91499	81837.53924	114220.7959	31523.48224	141414.4137	72366.30328	18252.83084	48408.4612
PA(20:0/22:6)	83979.82748	185789.1343	60037.72466	50716.24918	67250.36839	72994.82556	44252.60425	70131.07451	98121.63042	29303.53934	42168.88868	67282.98242	134503.8578	70131.07451	41462.55499	84087.66049	49740.85158	54362.78464	171601.019	64330.47952	8565.230188	50936.95633	109148.1278	86109.5844	36365.56664	62396.35526	14557.16158	61686.84262	63912.82676	28128.83509	79757.96695
PG(14:0/14:0)	0	0	0	0	0	0	0	552.8947269	394.4195961	269.3610023	0	0	0	552.8947269	0	0	851.5443888	0	0	0	0	0	423.353375	329.4879414	0	0	0	0	0	0	328.5036372
PG(14:0/18:1)	2279.8728	550.7651047	879.4386283	749.9289724	1258.358038	881.813023	0	2813.299786	675.6002525	0	834.0242868	1387.492801	274.7480498	2813.299786	548.9358981	1899.051129	797.6064751	898.6936134	1064.37815	1100.056681	0	836.6914918	1062.35313	1820.67703	0	837.2307349	404.4220437	282.2100205	1376.506229	0	1420.955536
PG(14:0/18:2)	1604.734198	847.388164	514.3230879	0	902.6355866	675.0344466	786.5369009	1514.022076	1527.835067	390.1085534	660.2420141	1577.944363	2090.482788	1514.022076	0	899.3274641	0	1102.961544	368.9072175	697.2798186	391.5143136	553.625	1044.752084	633.1578564	479.6221726	1199.020055	771.8539959	984.3996417	544.8721773	691.801323	1274.574594
PG(14:0/18:3)	0	0	0	0	510.82549	0	0	494.6218608	269.3835064	422.5658554	406.1098591	0	0	494.6218608	344.6918084	0	0	0	0	529.0196435	544.1701383	0	0	0	0	0	0	274.3095111	517.7412016	403.1135191	0
PG(14:0/20:1)	0	0	0	368.0362357	0	0	0	806.1200693	0	583.3098547	0	0	0	806.1200693	0	0	0	0	0	0	0	0	370.2862976	0	0	0	278.0920213	320.3562415	0	0	0
PG(14:0/20:2)	0	831.2806164	910.812292	0	0	0	0	0	0	415.5164037	0	0	0	0	0	0	0	260.6099826	0	273.194148	0	0	0	0	0	397.7366233	0	0	267.6654324	0	0
PG(14:0/20:3)	0	418.3227282	534.5965873	0	0	278.9019758	381.0405078	1301.457677	382.5221615	0	0	419.2209745	421.6656787	1301.457677	0	0	0	260.0878302	535.4727559	421.3785756	0	0	383.7062588	0	0	0	0	408.2031544	544.3049863	0	0
PG(14:0/20:4)	1630.422225	4013.661457	622.0505386	758.5407871	1220.182132	1973.967883	0	684.5820611	1738.579025	0	263.700375	1372.810912	1264.735384	684.5820611	1642.318083	2797.76549	1012.936769	1390.506862	2250.092507	1107.0559	280.0689819	833.6400556	2763.999239	1746.117216	1525.873065	1960.266696	1087.256487	767.3218735	1673.333492	421.8836473	465.2646486
PG(14:0/20:5)	0	0	0	0	0	536.1331569	534.0210768	0	420.5077514	262.1819431	0	0	0	0	270.7223324	421.8462675	502.017592	0	401.1229382	403.1793074	0	0	639.7557387	669.9999146	0	0	283.3235405	0	0	0	0
PG(14:0/22:4)	789.6051338	750.710143	0	0	0	0	0	500.4756723	407.7951778	280.6154343	0	0	637.9729709	500.4756723	822.6085931	518.2012049	495.0787461	0	495.671429	499.181806	0	676.5017266	1476.215812	499.0159695	0	648.2566722	0	699.5351905	839.8592016	0	0
PG(14:0/22:5)	0	627.4817043	0	0	0	642.5802728	0	0	948.7430921	0	559.9156775	864.3467753	879.1600752	0	684.0770164	977.8181529	1013.132713	0	687.1690454	0	0	0	882.1128973	592.7001397	1064.146637	0	0	555.6643034	0	0	0
PG(14:0/22:6)	746.5166223	418.334344	403.0791844	0	795.0747581	0	666.8222959	552.7298837	268.2117056	310.5913145	558.1274086	0	699.7155018	552.7298837	562.6883219	1756.515439	0	972.2856073	938.6667008	279.2075063	0	419.4103938	402.9107408	674.4684624	402.5175754	822.7341091	530.2996194	0	415.6080434	415.758599	0
PG(16:0/14:0)	1335.225114	1353.05661	384.899793	515.4438577	10070.33674	0	487.0394952	5790.071539	655.700175	0	1574.703827	962.3338664	1103.989766	5790.071539	388.1345515	1958.251741	643.3206115	820.2161923	1021.21347	3142.081303	0	1226.631284	1930.561664	776.3740678	0	746.5191599	509.8665599	685.6418618	0	0	1533.675251
PG(16:0/16:0)	14886.57935	15912.99106	14084.74774	12589.96418	47647.18412	6035.032025	3229.282079	19143.65916	4649.533621	10763.02121	10182.47216	9335.960301	12179.42641	19143.65916	6973.023626	9253.201057	16566.95158	6255.331224	8184.253689	22749.94655	1121.635552	4231.81678	16501.41987	10214.17638	6382.452265	10233.04303	2101.386133	19478.48665	6513.648956	1461.244734	6340.298386
PG(16:0/16:1)	3815.672606	6243.491851	2393.331281	2394.492154	31579.77672	1397.901286	1455.40964	11427.81961	815.8760209	4933.045477	12003.82941	4619.255524	2773.458521	11427.81961	2180.607905	4750.992453	5443.773881	1534.479246	2392.322041	14221.23439	276.8420589	4898.43933	2129.612399	3581.922505	0	6439.201017	2038.201664	3863.603903	1806.395538	0	2003.08654
PG(16:0/18:0)	6931.458798	12452.63644	11412.39869	6194.698835	11144.12208	4350.478071	3413.991345	11905.33313	3515.66957	2766.671878	3344.523056	8014.131653	8093.976126	11905.33313	8543.020039	6146.457063	5808.99102	7522.347687	6486.891571	8506.231118	285.1393446	4605.462186	9627.971865	8415.225409	6365.094055	6357.835492	2060.846683	7635.143673	3685.408273	560.7959919	3206.52588
PG(16:0/18:1)	110533.5869	216817.9279	124503.6503	148692.6135	268784.848	84957.21841	88833.18303	263207.4132	84304.44188	101762.7497	70120.0589	187737.5646	182257.736	263207.4132	81460.55432	121005.2304	147441.3178	84465.16535	108999.919	148605.5629	10747.86297	152714.8999	143444.768	220461.6638	86245.88398	194148.6289	49828.98823	136377.2718	82146.19889	22693.48077	133453.441
PG(16:0/18:2)	40686.68323	52297.56797	44670.30192	26298.56151	72868.95339	33994.29037	25077.42772	80523.84259	25464.37632	49686.41301	36715.73641	39063.48711	44046.45804	80523.84259	22446.38043	33472.70802	47037.15018	19566.76611	31662.64417	56504.44954	3766.088251	31942.83337	42937.78515	51693.35746	38306.65651	41406.65797	23502.76442	42668.42273	28031.92276	5992.023594	30098.83606
PG(16:0/18:3)	935.6368357	1391.658655	1464.240157	399.3068006	3330.143676	984.0871677	374.950882	1297.4508	531.2949906	842.3824686	555.8188963	556.9354444	821.4804367	1297.4508	558.8328458	558.1307049	1202.615214	562.0421871	2137.405644	1421.559039	0	696.0625	928.5102138	2269.693344	1056.422273	708.7094324	0	540.7123358	0	393.8178841	2945.846555
PG(16:0/20:1)	2596.413064	4032.323155	1872.756184	2671.147463	5880.659802	0	0	2609.7087	1529.918476	475.1313499	586.9886542	1398.310182	1664.645674	2609.7087	1609.512991	695.7117422	1599.792012	1531.620873	535.7325113	697.7685123	419.2774198	699.0054688	2271.38335	2140.186049	667.7239236	1172.686972	939.8480875	943.4645967	819.0493696	278.6889222	1564.139591
PG(16:0/20:2)	22826.10041	24196.70115	13094.98031	16878.63561	42546.80658	9998.447491	5616.818526	36016.0821	9462.282228	6945.028815	7538.663463	17798.23276	18066.55369	36016.0821	10165.91619	11796.06292	10668.44869	10435.92044	12401.90282	10071.57736	1536.461372	8523.554248	23967.40578	18331.71199	17347.51517	19109.26811	7440.583698	20144.29196	7644.392575	3076.145789	16304.02957
PG(16:0/20:3)	4513.819576	6233.372428	6789.005448	3337.356255	5181.314349	1682.034558	1432.860702	11620.11597	2935.492365	1945.407957	558.9863916	4001.049719	4177.06015	11620.11597	3232.192805	1465.750201	1731.276371	1743.717407	4877.625182	3450.627431	277.0050092	1259.597789	4093.251407	5778.489284	5103.013564	5661.584186	1522.229998	5598.944306	1817.990281	270.7242573	11612.30567
PG(16:0/20:4)	17937.83281	19113.83129	13329.69126	6404.561325	15781.03973	4818.698903	8170.939302	24539.15768	10424.38118	8802.121562	4688.167396	15183.17523	13859.5603	24539.15768	15691.28402	12339.93468	5640.48334	12526.02822	9102.425169	13627.16401	1359.514607	5250.313572	6861.069305	9659.287162	24949.8344	9528.490376	6355.114864	18315.56318	6713.912401	679.9887381	11350.7485
PG(16:0/20:5)	667.9758937	0	0	0	1067.325355	411.6432424	0	1333.124554	0	418.3533604	396.173474	513.2475787	282.0672557	1333.124554	0	1204.957461	933.7095728	404.9232861	1328.525308	543.28397	0	0	0	0	0	0	265.7865879	416.4032483	0	0	661.9402163
PG(16:0/22:4)	1321.10658	549.4801441	1068.188288	0	0	0	0	0	799.4080731	536.9305842	265.6360017	682.8867061	263.4981364	0	393.0538358	784.9057699	401.0299138	274.1653296	0	689.4195025	0	1242.954218	1056.864815	801.8527839	0	406.764773	0	1391.122943	550.5117329	265.3059891	661.0503243
PG(16:0/22:5)	1190.565706	1648.444029	807.2495501	536.1428544	1046.369213	693.4322408	0	1047.09119	903.6103756	0	491.433369	274.8811017	834.2564492	1047.09119	527.6332148	1139.600997	0	680.652472	1205.879898	405.0641839	0	0	648.1968982	804.1139716	402	817.7345378	0	692.666874	409.1382543	391.8146611	1451.639031
PG(16:0/22:6)	1383.638604	828.045831	0	1330.887484	718.6175521	550.2316029	658.3377151	492.5607615	504.8674014	404.3004064	758.2132548	687.3272204	886.8699819	492.5607615	1004.850255	1663.753084	725.7402099	645.8691013	1813.453402	273.9590491	0	687.0306447	0	1209.361592	1306.527102	811.2974056	397.8169524	891.0541106	1146.531326	275.8455219	978.1636106
PG(18:0/14:0)	918.1423604	838.782741	611.3834032	845.9682578	1333.237024	980.5622413	366.8976404	2867.846102	265.9465295	0	929.4799	977.4670235	552.982216	2867.846102	0	0	0	0	604.608	700.7836196	0	282.2727429	0	0	482.5035049	0	0	823.8454018	0	0	0
PG(18:0/16:1)	2738.323765	2117.678766	4140.698557	1872.320653	11988.27915	418.9940712	1201.206435	3839.391424	0	1518.297854	3291.591728	1792.066007	978.746564	3839.391424	1926.690398	681.9139355	1739.476614	1809.918856	1069.78197	6593.534231	418.4106429	3558.024132	2140.161959	396.6171271	1194.468066	3000.063517	0	2510.084034	1092.162214	566.1182457	1958.446723
PG(18:0/18:0)	4867.92688	9032.384525	4334.344683	2986.691605	6540.980759	5286.461326	2654.560397	8804.752527	3674.707216	2919.392407	1110.638447	5042.488475	7019.126288	8804.752527	3871.288795	1932.905335	1475.597837	5442.716012	4651.979312	6582.145176	276.4733492	8216.271153	4049.821926	5270.07605	992.9018578	7700.908423	1252.215434	3608.93942	4995.645048	655.6404887	4512.634861
PG(18:0/18:1)	102003.9523	187766.1397	92458.85943	90166.96932	78185.20288	59149.44276	66106.46328	220110.05	38056.06771	74153.2526	37021.19823	87755.65251	119521.8604	220110.05	77291.49732	88773.31894	68806.97948	70663.8779	67537.77917	72627.3565	6710.295037	151208.0682	89253.69934	108070.883	40653.89063	164360.356	33193.73263	84611.21478	60064.42434	11169.43341	78197.36525
PG(18:0/18:2)	95945.65217	132059.8349	94448.46039	61968.35568	128313.3718	63705.81824	56631.55191	152739.8927	44907.47123	81124.69573	49801.93445	96046.3939	112253.0849	152739.8927	82202.17399	56843.51723	46274.74375	53759.84815	55326.94401	54886.78958	6664.102659	81545.69363	80193.81831	96189.15568	53109.21097	110647.4276	36629.46608	57691.07607	51748.41251	9825.546465	79193.85901
PG(18:0/18:3)	959.3005109	974.3493282	1094.627973	602.8921713	3434.568157	418.9565773	365.1539027	1090.93084	395.9764803	271.8300581	266.9422175	978.2225839	699.8460835	1090.93084	1492.128698	790.3649653	0	837.6530025	970.730855	836.1996382	0	699.0739024	0	845.2874179	2674.228375	971.0153694	0	1119.875582	414.4513527	280.1157818	2554.944428
PG(18:0/20:0)	1622.235011	1326.176508	768.4411479	1341.997633	1125.643192	599.5568315	591.5682656	1610.657783	1948.353734	1244.581936	0	1244.415033	1250.525337	1610.657783	694.6442212	2022.245848	454.9331505	1259.808735	1106.414679	502.4178448	626.7703222	1881.580051	740.4974933	1119.763493	762.4631572	867.296689	558.1471894	1139.950202	1578.653023	0	1818.094356
PG(18:0/20:1)	1287.604943	2356.618728	1473.472389	1091.160905	1606.927862	1823.340958	0	3599.936847	940.4744371	832.6537552	684.6204582	972.3888768	2502.234433	3599.936847	1087.654503	1068.963476	535.5542898	692.7788604	1071.305115	832.0011475	0	834.2137622	0	0	0	1902.588559	277.5695073	971.345681	275.0476586	278.6649334	1003.749121
PG(18:0/20:2)	19112.27807	20478.68094	15750.93111	14623.43778	11484.50931	7759.029108	3622.330304	31618.13989	6322.214502	8892.278739	5880.508761	11792.27145	8861.693995	31618.13989	9145.596827	9077.452938	5300.46542	7067.266034	3627.422124	5126.204513	970.848116	9554.667158	11871.64063	7636.365381	6592.901258	16832.12257	6275.258437	10052.08275	7084.195585	2088.062371	11841.55848
PG(18:0/20:3)	9662.341641	9866.799699	7351.562177	2142.345323	9623.194992	2346.054733	1173.561978	7465.910797	1016.466354	1783.034386	1997.959894	3984.24572	4201.174117	7465.910797	1880.686586	1206.624725	1739.996137	2321.553802	3906.183319	3293.878456	692.850373	6593.189607	3735.664261	3896.092323	2007.322198	2909.748591	968.9007803	1799.716907	2432.357126	278.1491249	6684.505482
PG(18:0/20:4)	16642.62598	32516.67695	42995.11581	4006.567044	9420.317655	9080.818439	3800.109531	13373.64354	11825.16233	7235.329963	2634.631386	12389.96148	21623.13128	13373.64354	12582.76983	10482.16666	7846.896535	13142.58093	10081.25211	14124.00321	1052.413335	9396.75129	24049.04252	6254.720022	9234.522696	15611.14657	5472.217436	19684.07468	8627.797887	524.8350629	10308.13334
PG(18:0/20:5)	817.5411022	646.7258864	0	0	0	0	476.8798902	0	0	661.8068611	0	0	0	0	277.0744779	0	383.6158039	501.4545474	0	386.8862622	0	0	0	0	0	503.8218063	0	0	423.4206393	0	0
PG(18:0/22:4)	509.8294262	652.3147961	1157.787405	444.4621452	643.2	0	0	0	270.6557018	259.0754417	0	0	1688.542423	0	266.4255143	581.9099422	0	1044.994103	0	519.7908144	0	392.3082871	2058.092813	0	389.3752918	0	521.4379079	1317.280226	0	785.5685808	514.8856713
PG(18:0/22:5)	1106.562174	1057.968559	1178.043806	0	653.9199016	666.7866675	0	0	0	794.7323052	262.7666528	400.0484228	796.0743014	0	378.7349565	392.8841639	0	397.4124652	639.7994908	0	0	930.3613301	368.3319392	0	0	1042.527934	0	1078.419083	270.52487	0	1416.689688
PG(18:0/22:6)	413.0443318	0	664.3857946	0	0	469.6269268	0	537.5522984	832.167129	0	0	0	876.3523035	537.5522984	0	0	0	0	1295.639552	0	0	443.1382215	0	496.2683724	0	1752.081596	0	0	0	0	1208.311729
PG(18:1/16:1)	2276.42173	5020.327818	4704.311475	1807.064808	3086.28138	1947.174939	1685.861991	4407.639621	6307.330908	2090.711337	1595.571743	3789.155001	6394.550065	4407.639621	5820.266122	4384.242245	3796.915101	4107.999553	4723.647939	2634.301571	562.9442069	2973.706878	4367.470018	3407.087635	2802.407964	7162.953811	2428.982553	6132.88348	3614.419759	1844.520142	2973.498465
PG(18:1/18:1)	18510.56792	18892.89901	34280.68662	17128.2934	16775.58361	13886.85598	12825.65782	25434.54517	7136.334062	12399.12271	6603.011347	30538.77036	18825.51731	25434.54517	14734.63323	20332.04398	16054.15795	15418.83973	13719.43933	25241.9506	964.4112763	26760.22472	29566.45578	14214.80313	13382.15378	26099.07343	8440.813706	24383.7159	7680.936298	4145.064098	12985.64361
PG(18:1/18:2)	170521.8917	27124.4315	77562.89992	26735.57974	59147.62521	17494.36485	170384.7755	37127.11041	73934.46194	44144.10772	11093.26666	65061.08311	102791.0842	37127.11041	53865.21092	92122.93981	36678.00981	24397.16376	13057.434	39612.51367	2232.226341	23558.42061	72469.62047	24904.28117	19043.73143	90255.71058	30230.88661	106963.0508	32776.26878	17326.89032	44028.89044
PG(18:1/18:3)	0	1250.672067	1606.852329	405.7465329	0	972.2735158	0	1331.561028	2174.058998	1734.948498	0	977.5202949	1663.036087	1331.561028	1153.935782	3088.901589	0	424.6909353	669.7260677	610.7907079	0	1110.295103	0	401.6067202	0	0	0	697.3177744	0	0	850.6185135
PG(18:1/20:1)	394.3359704	1198.408033	0	391.1879194	0	0	0	0	268.0485927	0	0	0	0	0	378.0361835	0	389.8502549	406.1029675	652.3092593	798.8169884	0	0	391.28	0	0	398.0577946	0	404.5678286	0	0	0
PG(18:1/20:2)	795.739519	1809.229889	804.784196	536.5070467	1340.767582	973.6585916	0	392.6778459	396.6868998	812.7113988	0	419.1401449	836.6012233	392.6778459	0	799.4525726	1473.937736	423.9336505	536.3310157	700.021578	0	977.5004327	666.4850456	670.536	0	1450.56821	394.9948988	415.2106018	0	0	1847.637265
PG(18:1/20:3)	1090.932718	1524.228453	2815.754135	528.5944996	1836.02716	1096.811393	0	966.1183059	1805.317313	564.468911	0	1364.226949	1361.751239	966.1183059	1017.851016	385.9794821	399.2334093	542.6097837	385.6136518	945.3584415	0	666.9430669	2126.651043	789.6765694	797.1922148	1372.872623	258.055781	690.7427849	690.9563835	0	803.5230816
PG(18:1/20:4)	4905.596819	7641.669444	11456.68553	1495.372194	2886.252774	3096.502494	3240.863068	6627.423702	3495.495364	2266.743128	497.6669423	5082.791665	8732.784924	6627.423702	4662.358914	4073.277831	3704.423033	5367.666998	3424.526232	5581.161385	0	5621.547588	8902.271816	4356.645974	5909.618303	6293.8345	2418.804226	7405.517111	3280.960949	518.9406507	4806.116557
PG(18:1/20:5)	675.4865437	407.6558585	395.031387	0	0	646.0929805	0	0	501.9397367	0	0	273.9855241	681.6604243	0	0	0	0	0	0	413.9520339	0	383.5879497	0	0	0	0	254.6640869	268.2367578	411.7989523	279.488395	0
PG(18:1/22:4)	496.8159245	1378.911454	400.0769532	0	0	415.6124385	400.5781027	0	765.6701122	381.1742271	0	968.7689462	1357.938397	0	995.5167049	391.7803837	505.6154721	276.6298041	0	557.2662881	0	553.4267947	869.7345108	0	0	815.3884999	0	1089.195877	831.4052861	0	0
PG(18:1/22:5)	994.5951712	992.760428	0	0	430.6012247	0	0	815.1501277	0	0	0	1208.750851	0	815.1501277	252.2053997	520.1791619	0	535.7009425	0	754.6949766	0	0	673.658347	987.5450068	0	407.4992984	0	565.3190354	673.7408352	0	0
PG(18:1/22:6)	1000.264851	1659.045039	828.9166538	471.2217954	0	588.2504969	0	943.5536877	861.1752798	614.3855496	0	1201.364474	0	943.5536877	382.7947246	256.2024327	587.0841987	579.653072	1051.590713	594.2960206	0	0	1310.320955	990.3965919	710.0634783	0	0	0	0	0	1059.590907
PG(18:2/16:1)	7607.170302	8914.838465	7447.817709	6273.06405	8113.903162	5744.67638	3220.841673	11765.39067	5598.864669	6381.284992	3124.818411	5772.763837	6941.454109	11765.39067	7279.404188	3254.850217	6528.774275	7893.41979	10107.30015	2424.218006	820.6760207	7991.719121	4922.954078	5986.334059	7281.68292	9441.491455	4750.720963	7228.317216	4969.276523	4153.85941	8851.861348
PG(18:2/18:2)	20405.75243	27670.84738	20846.76808	3000.686423	6257.39347	12565.94368	5109.424637	8941.331257	13583.97324	5741.283575	4664.593229	8912.073518	29045.98918	8941.331257	6044.032241	7048.372704	7519.460163	15180.24633	10352.05322	6723.966468	0	12710.46763	28287.1529	8453.542383	13746.86153	20103.6699	6588.441568	23551.48173	9990.419978	2090.331503	9457.973172
PG(18:2/18:3)	3624.220499	1904.076397	2241.524306	0	1401.469711	0	897.2766831	1195.224268	2575.186522	0	0	1176.438033	2222.934896	1195.224268	1394.910411	1909.965679	704.2133309	1032.623903	2483.40119	1100.685812	0	0	2634.549551	1035.636788	1149.292715	1746.182964	875.8948846	647.2275977	2363.585308	0	2982.094997
PG(18:2/20:1)	380.262867	0	0	0	0	0	0	528.3129686	403.753135	0	535.3474618	0	267.9510679	528.3129686	0	422.8677234	0	0	0	0	0	0	0	0	0	401.3627907	270.5887642	256.6368245	0	0	374.085646
PG(18:2/20:2)	4076.762909	2438.607354	1336.659061	1808.890373	800.1723067	1384.693609	3434.840998	2206.540842	2671.315904	1731.342207	0	1927.682761	3294.658409	2206.540842	1154.623244	1809.667215	750.6830738	1447.875752	1238.471541	1612.84124	0	1099.660963	5490.738488	1719.309891	1372.719887	2804.168856	0	5816.990949	0	0	3003.118638
PG(18:2/20:3)	1833.611494	1634.526144	865.4096866	1435.80568	494.3035635	0	0	776.7135524	713.9541375	375.3495751	0	840.8189627	361.285241	776.7135524	876.9626792	458.9011154	0	357.6610615	767.6224277	0	480.8963873	631.3017239	0	448.9173232	927.0264736	1888.453578	0	762.8185997	374.5082699	0	0
PG(18:2/20:4)	4728.011938	2894.885042	5808.475437	2045.147216	2551.895637	2530.234405	2534.847799	2983.774869	3314.972302	2830.624734	2202.468528	2130.496362	3045.273066	2983.774869	4164.345341	2728.677324	1944.227088	1404.392003	5414.685517	2506.483397	0	2050.12429	2580.747809	2189.144263	3400.258991	4947.646456	988.0099198	7100.173765	2995.24223	804.0132488	1953.666873
PG(18:2/20:5)	503.9154662	0	534.392	557.7319804	0	0	0	516.3535194	668.2967935	396.590595	0	0	0	516.3535194	384.8274056	0	532.0372586	0	396.3718782	0	0	0	528.7109049	717.630999	539.1399048	502.1105111	0	812.2585523	0	0	510.6214833
PG(18:2/22:4)	640.5445812	0	0	0	367.16	616.6608641	0	485.8529456	0	252.987928	0	0	489.1060608	485.8529456	378.8493889	396.1560696	0	362.3283714	365.6766299	370.2930434	0	614.3015606	0	0	0	919.3807513	0	503.5866716	0	0	0
PG(18:2/22:5)	371.5298525	0	0	353.4780406	0	0	0	371.0209533	0	0	0	0	392.8997811	371.0209533	384.3712012	396.632535	0	0	0	0	0	0	0	0	476.290484	0	390.7855527	387.1889017	0	0	528.639865
PG(18:2/22:6)	770.3167402	659.2703815	651.7689181	510.3073985	0	0	0	512.3277659	0	277.2922471	0	0	914.0303901	512.3277659	518.0902765	402.610187	0	658.7020358	527.3107888	465.252004	0	623.0733294	1171.417277	0	0	375.0910022	0	0	0	0	515.0086506
PG(20:0/16:1)	0	0	0	0	0	0	0	282.3677713	0	260.2471184	0	0	0	282.3677713	0	0	0	0	0	0	0	0	0	0	0	0	0	0	0	0	0
PG(20:0/18:1)	2255.544677	0	516.9604288	1161.780928	0	0	0	1369.460566	672.2407695	393.9646607	415.0765499	636.8822783	454.4769786	1369.460566	962.6380952	667.2011371	1020.216501	0	0	0	0	0	1612.975722	519.9933933	0	1333.821354	417.0950161	1573.208987	0	573.1148827	1181.654346
PG(20:0/18:2)	1707.636192	0	624.0697055	0	0	0	1053.71533	1504.112456	1039.244452	874.1132634	401.7561647	0	0	1504.112456	1551.384555	768.4073732	671.3468125	1177.888148	0	0	0	0	1785.609866	1145.705206	964.4664573	645.5914152	583.9977954	0	0	0	1236.238333
PG(20:0/18:3)	0	0	0	0	0	0	0	477.40364	269.6354091	0	0	0	0	477.40364	0	0	0	0	0	0	0	0	0	0	0	0	0	0	0	0	0
PG(20:0/20:1)	0	0	0	0	0	0	0	0	0	0	0	0	0	0	0	0	0	0	0	0	0	0	0	0	0	0	0	0	0	0	0
PG(20:0/20:2)	0	0	0	0	0	0	0	0	0	393.2342601	0	0	0	0	0	0	0	0	0	0	0	0	492.2424935	0	0	0	0	0	0	0	0
PG(20:0/20:3)	0	358.3292163	0	0	729.8261287	0	366.624	369.2706426	0	0	0	0	0	369.2706426	259.0398284	0	0	0	0	876.1571913	0	0	0	0	0	0	0	0	0	0	0
PG(20:0/20:4)	1045.766817	808.4395708	600.4153977	898.6709324	0	773.5545884	0	763.1073604	1120.924707	873.3460151	0	0	787.3911039	763.1073604	514.0087422	814.6855456	802.1548699	805.8247103	563.6749284	598.5986705	0	502.9770512	1645.322752	690.4781657	1293.50212	1316.74494	252.1777781	1204.168258	1455.414846	0	1151.598936
PG(20:0/20:5)	403.2006064	0	0	0	0	0	0	792.0779171	0	0	0	0	0	792.0779171	0	0	0	0	0	0	0	0	396.9004918	0	0	528.7979684	0	0	0	0	0
PG(20:0/22:4)	0	0	0	374.8259479	0	0	0	0	0	0	0	0	0	0	0	0	0	0	0	0	0	0	0	0	383.9377764	0	0	0	0	0	0
PG(20:0/22:5)	0	272.084312	0	0	0	271.1179762	0	0	0	0	0	0	0	0	0	0	0	0	0	271.0389784	0	0	0	0	0	328.9424307	406.8375965	0	0	0	0
PG(20:0/22:6)	330.6744333	0	0	0	0	0	0	661.4763303	0	301.5473159	0	0	0	661.4763303	256.6444105	0	0	0	0	0	0	0	0	0	0	560.9605954	0	0	0	0	0
PI(14:0/14:0)	578.2686356	0	1116.01165	529.3761403	0	0	0	0	0	0	0	509.7187181	0	0	0	0	0	0	549.378189	0	0	0	0	0	0	0	0	0	0	0	749.5370201
PI(14:0/18:1)	2674.80251	5753.592087	5675.44543	3102.439059	4545.080961	3324.896557	3471.988686	6017.093327	4067.264625	747.0327568	1173.039182	5168.486157	2910.849032	6017.093327	2650.477414	7328.701406	3091.167359	4678.566807	4553.329251	7652.828974	0	3090.811964	4128.768576	4369.828937	2619.780536	3988.872881	1467.293451	2776.255387	4376.601714	2015.404435	1951.151228
PI(14:0/18:2)	6929.099146	11650.58282	13460.72796	6773.596508	1943.45078	12425.07019	6860.613015	17190.08742	7745.722329	10474.41494	4738.44406	15190.32902	11603.2006	17190.08742	9041.637012	13668.27272	4380.499391	12984.21703	10888.90751	6517.642712	1132.243132	2933.117758	6908.93949	11381.07308	12080.97285	11504.52885	2348.102289	10404.51423	9961.076955	3761.969582	11173.201
PI(14:0/18:3)	0	0	0	0	0	0	0	300.0031554	0	368.9271015	0	0	199.6589307	300.0031554	0	395.4708973	0	0	554.6182512	0	0	0	0	0	790.8561308	0	0	0	757.7673879	0	595.3696403
PI(14:0/20:1)	1056.240119	0	0	0	0	0	0	2015.537159	318.1045027	0	0	0	0	2015.537159	0	0	0	0	0	0	0	0	0	549.9415235	0	0	0	0	0	0	0
PI(14:0/20:2)	1009.925411	0	0	0	0	0	0	522.0779373	822.7942657	255.7299075	0	850.9809649	511.6674647	522.0779373	549.329538	784.2071791	0	0	0	1161.298541	0	444.5432325	570.9892127	0	0	494.2053059	0	0	0	0	0
PI(14:0/20:3)	3793.242722	1645.154192	2083.222308	3508.889558	1135.96332	1460.210698	2446.252587	4721.390422	2367.702332	2868.044016	3002.710004	1642.115665	2101.532562	4721.390422	1423.249601	1970.466809	4240.826459	3041.641201	2696.357637	2837.800142	1142.903114	599.1210907	4044.59154	3355.394935	1280.741328	4057.621109	4119.194984	2476.737681	3464.381439	973.9478958	5220.827956
PI(14:0/20:4)	9732.110496	6722.369562	6397.855059	1510.87406	5246.320027	7537.098116	4256.431333	6878.830878	7082.956188	7508.749874	580.9372803	8816.45954	10520.0483	6878.830878	4313.791212	8658.215987	7248.594916	8942.19104	6639.89225	6969.576178	0	8397.361932	5575.476514	7627.563868	7331.589796	12492.82727	1436.914563	8239.738093	6537.55658	1899.486888	4667.656792
PI(14:0/20:5)	1513.121924	555.1308107	0	586.7054987	0	540.4323129	0	906.542453	2015.650987	0	849.392136	547.4548878	1104.019092	906.542453	1157.579986	0	0	1431.139965	1737.026307	2838.166221	0	1956.807325	878.7311298	2183.412332	0	448.5464911	0	1422.484285	550.8901548	0	270.3618154
PI(14:0/22:4)	2120.002329	0	860.7287097	0	0	1076.90567	0	0	1158.791098	575.6095961	576.261824	0	1093.863829	0	577.5704998	2019.790645	0	1127.990005	585.0448666	1694.858477	0	0	1203.406259	1173.82957	3553.609025	2389.684779	1146.095947	1707.180553	2271.400165	1642.415239	1196.193578
PI(14:0/22:5)	1207.199425	1664.003612	2034.746918	0	722.2874612	689.9909086	0	902.0505602	869.4433502	868.9040189	0	0	1920.875032	902.0505602	1149.023364	3181.060854	0	856.4542934	1103.146854	1300.56982	0	574.1851071	1316.567423	1742.840267	1164.51184	1492.873501	0	836.5408675	1422.092734	807.9500924	1803.847612
PI(14:0/22:6)	2728.139187	0	1365.954156	0	0	0	0	2671.588462	0	708.0654268	0	567.0797208	0	2671.588462	0	0	0	1268.320953	1100.256244	0	0	0	0	548.8919831	0	1185.578233	0	0	0	555.274513	1185.785941
PI(16:0/14:0)	604.9782237	0	0	0	0	0	0	711.4221241	0	0	0	594.0928047	0	711.4221241	0	0	0	0	0	0	0	0	0	0	0	616.4287634	0	0	0	0	1096.098162
PI(16:0/16:0)	3734.38753	0	333.1461702	0	1880.313357	0	0	0	0	1004.257846	0	0	1512.874048	0	0	909.4526642	0	934.3363489	0	512.7002744	0	0	0	0	0	0	0	0	884.0639704	0	0
PI(16:0/16:1)	0	1784.367994	733.5648627	0	3590.770281	2207.243294	0	1566.991393	0	0	0	1132.490176	0	1566.991393	0	0	936.0976337	0	0	1391.394405	0	0	0	0	0	0	0	0	0	0	0
PI(16:0/18:0)	5770.605131	2861.052389	3898.897839	1497.444475	1820.304627	4523.458276	2083.252833	2188.222459	708.9618312	3518.252289	0	1596.725448	1665.593326	2188.222459	1688.905077	2150.610122	1846.614334	1619.559828	6849.408595	2195.921336	1028.063051	3088.520585	2985.490491	4893.623504	2146.252822	3748.441814	1490.376962	3532.908869	2816.428709	0	3579.85533
PI(16:0/18:1)	6747.275345	4639.260289	13693.40752	5047.476933	4053.891101	2351.282401	2379.287185	1620.535891	2491.311874	0	1984.485551	8929.664996	0	1620.535891	1518.924555	1244.366052	4168.933068	1626.378067	5517.840615	6049.818154	0	1282.965193	1673.858838	5823.465436	4267.521134	0	2509.681178	3613.77347	1526.43472	0	2459.206087
PI(16:0/18:2)	5406.067635	3400.627338	10902.13158	7696.594454	14343.37633	5414.532378	1400.126721	3086.006684	2329.251401	4894.494871	2251.931915	6477.454296	629.1684431	3086.006684	1946.152485	2056.059381	10622.8337	5542.560794	2517.204062	6950.127783	4535.828714	1564.898024	3764.36069	7985.541341	4319.793978	0	2769.188081	1384.26925	823.7149467	5439.185461	932.1766287
PI(16:0/18:3)	562106.7289	962700.6186	519118.678	254339.3125	639046.9688	238862.3136	196928.1333	662833.0513	398567.1946	196471.6221	112274.7015	194163.7129	426204.2113	662833.0513	302215.191	269649.5239	145054.5574	413676.5185	494822.9914	259340.928	33596.17208	254174.3958	214288.7128	287984.0681	284762.9109	391054.6891	88189.00701	398587.5298	325754.0385	64945.12977	1292476.836
PI(16:0/20:1)	0	0	0	0	0	0	0	1041.035831	982.9131283	0	0	0	0	1041.035831	0	0	0	0	0	0	0	0	1518.17718	0	955.6227467	0	0	0	0	0	0
PI(16:0/20:2)	765.5874504	1053.259437	1572.402301	0	0	1041.905742	1835.038885	0	0	0	0	0	0	0	0	1005.938575	0	2086.032078	0	0	1044.819398	0	0	1539.502168	1047.891703	0	0	0	0	0	0
PI(16:0/20:3)	2643.893737	0	0	291.2971504	0	0	0	0	1566.527954	1045.368216	0	261.4435613	0	0	0	949.0978802	390.3562438	0	260.5332226	0	0	0	0	0	0	0	0	0	330.6049495	0	0
PI(16:0/20:4)	4918.244224	18382.3035	10399.56326	8380.529935	11898.96957	2566.420523	2539.772964	3563.347934	4351.337646	2413.453813	1059.848755	17697.27718	5428.808219	3563.347934	1914.775151	4429.457983	7366.248484	4320.420072	7928.592591	16613.57237	1610.418695	1897.606156	5024.546722	7499.920885	2682.785904	1042.61047	1404.716592	5879.156024	2125.266733	2615.378287	1582.711373
PI(16:0/20:5)	0	0	0	0	0	0	0	0	0	0	0	0	0	0	0	0	0	1006.03591	0	0	0	0	0	0	0	1028.310946	0	0	0	0	0
PI(16:0/22:4)	1466.08974	0	0	0	938.4092265	0	0	0	0	0	0	0	950.1826698	0	0	0	0	0	0	0	0	2079.948519	0	0	0	1591.017041	0	0	0	0	0
PI(16:0/22:5)	1866.561002	2102.78031	2139.282182	0	0	0	0	0	0	847.4201623	0	2613.618072	0	0	1571.499428	1030.712421	0	1564.072779	1568.774769	1433.049655	0	0	1021.106967	0	0	0	0	1046.656501	0	0	719.7204815
PI(16:0/22:6)	2615.975724	0	0	0	1049.412509	0	955.5435265	0	0	1541.808306	1425.998312	0	0	0	0	0	0	0	0	1414.765871	0	0	0	1560.517487	0	1447.692273	0	0	1057.149525	1054.404592	1625.501712
PI(18:0/14:0)	0	320.6180393	0	318.1759531	622.0154141	419.0003177	0	0	0	0	0	0	0	0	0	293.4183967	0	443.499666	0	0	0	0	0	659.1719384	0	394.7770505	0	0	0	0	0
PI(18:0/16:1)	1393.325295	1534.335681	1558.051109	1039.831439	1695.155413	1041.896521	0	1550.699821	0	1494.902215	2006.642644	3588.167153	0	1550.699821	0	0	0	1051.985193	0	3105.5189	0	1055.560556	2099.182286	0	0	0	1574.526236	0	0	0	0
PI(18:0/18:0)	2884.859995	10959.52329	4506.509797	3412.315588	2411.242435	4158.302068	2019.254543	2592.189884	0	1181.936552	1500.764285	4339.449273	3123.905256	2592.189884	1988.063861	2497.817104	10565.54482	1555.364901	5036.247923	1994.416692	0	3439.485466	11162.2154	2263.264453	2696.902888	3527.941674	1015.035871	6556.463615	2549.925705	3093.806742	2995.026041
PI(18:0/18:1)	1890.699306	4407.251652	5580.901649	2564.258888	4342.644734	2938.511517	2491.946014	1273.927497	2373.737047	0	1318.538932	5926.783131	3269.293299	1273.927497	1512.824681	0	3972.925037	7015.617816	4205.045625	5862.522029	1016.905209	3451.253213	4651.190118	901.0132932	3101.448407	841.0380435	1967.960279	1503.522373	1517.772261	2619.687601	1816.110051
PI(18:0/18:2)	7253.462756	10365.26831	21764.97829	1811.534698	19891.92269	9562.594001	4761.190754	2931.760189	1586.553935	6068.951327	3379.287706	4554.997539	22713.01439	2931.760189	2913.761946	808.5470434	10196.51274	6133.801595	13787.1049	17568.918	2874.285867	6805.177713	12233.20499	10797.11636	15905.43467	0	3950.029391	10170.77258	3711.613347	6840.3998	0
PI(18:0/18:3)	0	0	0	0	0	0	0	0	1041.310249	1038.162278	0	1419.959895	0	0	1514.583842	0	0	0	0	1042.96217	0	0	0	0	0	1490.530302	0	0	0	1053.501693	0
PI(18:0/20:0)	709743.3682	698305.7677	744868.8511	562801.9646	479258.6	605369.2793	337863.9197	725973.6314	312743.0431	322515.3677	138901.5945	506299.0188	516728.3162	725973.6314	342261.5342	448258.7048	324231.2561	269792.1365	639269.2359	701744.8876	9500.447503	519706.9975	479699.4108	531747.7519	171301.2049	764014.9965	80538.90684	336026.1345	437838.7313	124533.3257	784054.9685
PI(18:0/20:1)	0	0	1049.517764	0	602.7781375	0	0	1079.350174	0	1039.910114	0	0	0	1079.350174	0	0	0	0	0	0	0	0	0	0	0	0	0	0	0	0	0
PI(18:0/20:2)	1586.776058	0	2399.192757	0	0	0	2581.210103	0	0	0	0	1928.532045	1411.145315	0	0	0	1573.611384	0	0	0	0	0	0	0	1571.199519	1000.34414	1552.26217	0	0	0	0
PI(18:0/20:3)	26227.68983	21943.36041	15667.82493	9832.191425	2218.219124	1911.422657	4507.734628	0	925.6023339	5566.473019	0	9588.60106	7083.509171	0	1236.527183	2620.251814	5353.659254	14005.48018	5493.253358	4685.164212	2037.328009	3147.487379	4434.325071	5113.988672	4297.116329	1438.985347	4014.287955	2602.758594	1426.510238	4187.782608	1816.024978
PI(18:0/20:4)	30978.34769	55250.30868	193979.9137	91991.63532	35206.06158	46461.87314	12931.43468	9953.128485	6086.586948	16446.04357	5838.830845	352637.2133	40006.75078	9953.128485	4280.256633	4934.827094	26235.78542	87910.21056	95994.23436	85925.13115	18259.91715	12646.58796	67358.68034	44627.1513	77500.58718	4468.171992	4052.621253	16184.66482	11013.96248	32808.69366	4526.871127
PI(18:0/20:5)	201.0778514	368.1639283	0	0	252.2133592	0	295.3814905	319.4236165	0	0	0	0	233.8266708	319.4236165	0	0	204.1812163	0	0	0	0	0	0	272.2070282	226.1234374	255.8243608	0	268.8841848	0	0	0
PI(18:0/22:4)	1474.772316	2517.559757	0	2924.817222	0	0	2792.529829	0	1293.159956	0	0	0	2051.334616	0	0	1552.099353	1573.680785	1559.665187	1038.537292	1212.140908	0	1548.061075	1366.847232	0	1250.032474	0	1470.629134	1027.806851	0	0	0
PI(18:0/22:5)	1458.494244	2130.937091	1460.524107	0	0	0	0	3788.379527	0	1051.92004	1020.179943	3941.880448	1316.348895	3788.379527	1563.503947	973.1309291	1386.90887	0	0	1027.711602	0	937.9243748	3115.162649	2594.554413	1011.225611	1057.467235	0	2236.019748	1053.948587	0	0
PI(18:0/22:6)	2432.891004	3129.25656	2873.485698	1181.31119	1445.237191	1565.368392	0	0	0	994.5888214	0	1514.481177	0	0	0	0	2096.013405	1052.797872	3655.283112	1753.387203	0	0	2812.334763	2224.489565	0	0	0	1879.325039	1019.343412	1541.161024	0
PI(18:1/16:1)	1073.218065	2511.896628	1927.441056	1010.034789	2467.167314	1181.779709	1037.889698	0	1859.788195	0	0	1564.084904	747.6667572	0	1021.264585	751.1873152	1289.607754	2121.598224	2688.903458	1432.890992	0	1144.099263	0	2326.122662	1049.517764	843.6440318	0	917.0190653	1049.656444	0	1624.890398
PI(18:1/18:1)	2042.901809	3742.256834	8383.027398	2151.191961	3159.465626	4301.527175	1447.256508	715.7574884	0	0	2947.055541	14488.78459	1545.438851	715.7574884	0	0	2975.936308	5392.470553	3570.079858	3080.060534	0	2603.093055	2270.729261	6259.653754	3867.702883	1026.656036	2451.899091	3681.824165	2082.205596	2608.886002	0
PI(18:1/18:2)	3731.980662	7022.51468	2970.300884	0	2891.87358	2840.102011	3649.867355	2919.16871	2600.613573	2166.81087	1731.075264	5481.176757	2647.322295	2919.16871	3118.113623	2592.329359	1071.76606	2420.310816	10614.74656	1267.099847	0	0	1305.10318	3190.356905	3114.265306	2176.426557	2435.00946	3918.298826	2362.771679	1917.795497	1904.62385
PI(18:1/18:3)	0	1518.882451	0	685.3912207	845.0362785	0	0	0	0	0	0	0	0	0	191.096326	0	354.7345892	1314.094915	0	0	0	0	0	333.1654468	0	0	0	0	0	0	0
PI(18:1/20:1)	0	354.4361038	0	208.8358595	208.6664005	248.4032297	0	0	197.6225663	0	345.9541544	0	0	0	0	292.4886415	417.7387617	0	659.5686632	222.342749	337.0119494	0	0	0	0	0	0	0	0	244.5140911	0
PI(18:1/20:2)	0	0	0	0	0	646.0379637	1049.609262	0	0	161.3841003	0	0	235.0370007	0	230.6695634	205.6094663	0	221.7972507	0	0	0	0	226.7000437	0	215.2450725	0	201.8969805	0	0	0	941.5643266
PI(18:1/20:3)	4122.316181	5572.324067	3630.090922	6512.544699	4321.306062	7672.899179	1643.508733	1325.1096	2492.459427	4746.432117	2971.0817	4254.703316	2479.730504	1325.1096	3116.37552	1870.258443	2892.460022	3835.816732	3975.294289	3869.130552	1183.092233	4303.122112	5418.79395	3276.868069	3408.489766	2453.29923	2187.277102	1659.497371	1461.225074	1306.271927	2048.614281
PI(18:1/20:4)	7072.429055	4038.973254	3307.902168	4318.785394	4231.199636	5893.609208	2240.446649	1993.047621	2481.762668	3840.645366	2468.93133	11875.963	5707.103616	1993.047621	3465.426253	8872.253354	1892.0219	7125.948121	7023.512735	2843.728701	0	4763.01663	10234.0278	3009.962263	4252.91779	2964.092939	2572.62532	3113.375946	3135.957916	2523.968317	2896.449269
PI(18:1/20:5)	183.6400668	198.9591724	0	0	169.5487765	288.1451788	0	602.5216343	0	0	0	0	0	602.5216343	377.0244258	0	0	379.2677143	0	189.3745437	0	0	163.6789139	0	375.0507685	332.4597245	0	317.5842656	193.2662487	0	680.673801
PI(18:1/22:4)	0	2371.242021	0	0	2604.651741	1512.552941	0	0	1580.766881	0	0	4084.343353	2099.071376	0	2492.476074	930.5377894	2358.842535	0	0	1545.203413	0	1532.442079	1924.382799	1902.105569	1535.386547	975.496283	0	1076.790355	1039.38756	0	1625.284127
PI(18:1/22:5)	1049.267437	1705.165432	2084.885511	1283.790381	2019.696594	951.1881684	0	1668.513809	948.2323068	987.0664729	0	996.5210103	954.7376681	1668.513809	1316.882437	733.4602978	1572.929792	2055.68457	2147.590163	1410.480058	0	1393.453491	836.5708892	2576.582219	1591.373907	177.918733	0	1105.644242	1396.248274	0	0
PI(18:1/22:6)	0	2909.338147	1261.996944	2835.607251	1117.47326	1977.345646	0	1152.857665	2496.672979	1391.530072	2387.661863	2510.98055	880.6380177	1152.857665	912.5730293	1110.236997	1955.466244	1381.772967	1977.01691	5300.582326	0	1404.519291	1923.59967	0	0	2010.963254	0	1034.530621	2175.170877	0	3446.801797
PI(18:2/16:1)	129060.4909	229384.7747	197364.0701	163603.072	94694.85396	297437.9414	108208.7682	195451.2235	235604.231	152474.7258	64519.96808	209263.1296	272131.0088	195451.2235	148589.3853	183804.9545	116674.6598	253622.6802	274808.7166	161569.0075	9886.852465	95889.11412	213814.4788	257516.3656	163984.4491	178002.656	40174.77272	154384.9394	178602.3563	111793.6082	271086.1249
PI(18:2/18:2)	694.833121	15021.77752	2904.3247	2340.288371	2278.331702	4042.355426	0	7750.721992	1325.828372	997.4435536	1273.421626	9839.822743	6511.587456	7750.721992	5504.188598	4755.879541	2951.572073	8624.380661	9555.542458	3521.538172	1514.55064	2495.91958	13297.19412	3402.069772	8448.297677	3326.059991	2243.407087	3238.157605	5786.334516	0	5229.939276
PI(18:2/18:3)	0	294.9399882	0	0	0	0	0	318.2557152	0	316.2029015	0	493.8397364	308.6201866	318.2557152	0	0	0	0	252.3776622	0	0	0	163.7011612	0	0	0	0	303.3862709	0	0	0
PI(18:2/20:1)	0	0	0	0	0	0	0	0	232.0381436	144.7716596	0	0	0	0	0	0	0	0	0	0	0	0	0	0	0	0	0	0	493.8369144	0	416.6971463
PI(18:2/20:2)	212.1338873	0	160.4981436	0	338.6846197	0	0	0	0	0	0	0	0	0	268.1000949	320.8920151	0	0	0	316.784049	0	0	0	0	0	361.8381659	223.1188447	0	0	0	0
PI(18:2/20:3)	1543.434316	2031.015562	1339.221923	2470.982917	1122.194885	753.6607741	2353.930177	858.007012	1409.033765	1794.191749	952.3057832	473.3667135	3662.060788	858.007012	2627.832338	1778.564155	556.6464263	756.8618257	803.616043	1227.067715	1356.556292	2028.305738	2032.251818	2657.218367	809.3920704	2016.96346	1255.311432	2682.973844	2347.82296	1120.548952	2862.472336
PI(18:2/20:4)	10711.70999	14609.52571	22221.53846	10620.42744	15340.82331	16980.75211	9731.091804	8569.188183	22453.19999	15481.70784	2160.830462	12316.81755	28970.17542	8569.188183	26878.93766	13261.44387	12471.8872	67732.62606	13768.61962	20046.1818	0	12046.78635	17461.34987	17146.78269	13196.4182	13493.35095	1400.904361	15306.57949	19183.14616	7479.295126	31647.02879
PI(18:2/20:5)	577.1321567	0	0	0	0	0	0	1221.847428	755.7220303	0	0	0	0	1221.847428	0	0	0	0	0	0	0	0	0	0	0	0	0	0	318.9001883	0	876.6259623
PI(18:2/22:4)	0	0	0	0	0	0	901.0498219	0	1997.069804	0	0	0	0	0	1401.122642	651.4596571	0	0	0	572.5187932	0	1081.115412	0	0	0	880.0582758	0	0	0	888.3302432	0
PI(18:2/22:5)	2445.382202	1352.295385	1057.30694	2194.214723	1790.782095	0	1070.739486	1379.228584	1223.523576	669.6404327	0	980.868694	626.619075	1379.228584	623.3180722	1133.954175	1074.698177	574.3948881	822.5801448	2408.790152	250.5084738	1578.637849	549.3505158	840.8920189	841.4589185	1819.791214	1598.009426	600.7227114	1074.963023	188.5106453	1462.252396
PI(18:2/22:6)	890.5178234	1162.654328	1161.813528	1537.499824	0	4378.841079	894.6493031	1723.444359	833.1717083	1390.132432	0	0	1138.172942	1723.444359	0	831.6923232	0	2418.552909	1859.542013	1922.75571	0	2248.942247	1612.798318	3110.685727	1098.411129	865.7352946	0	1417.768771	836.2483782	1864.767841	4027.68416
PI(20:0/16:1)	7259.829746	8640.507116	12793.30511	4102.2857	5791.274869	8713.28997	1693.241738	5774.178615	1327.140402	2078.879003	1434.273333	5757.393804	4857.232816	5774.178615	6891.35129	4619.849729	2648.73871	2741.064547	11522.50621	4828.039188	0	4350.875626	6045.297048	6891.980512	3548.039511	6730.021274	2256.286915	4167.945433	4704.220579	1619.803597	9032.349854
PI(20:0/18:1)	46623.99687	95037.29859	72957.55653	52285.93683	43907.88788	86820.79319	41304.45806	44238.66233	41650.6767	40033.10222	16990.73485	63246.43599	50076.49927	44238.66233	41294.81741	48591.80048	32057.24519	23215.8593	77862.06596	44543.3324	1474.321975	36726.46303	47653.70834	55151.45088	26960.67699	62423.76596	8211.338879	41268.76822	45693.83428	15167.9375	73550.20519
PI(20:0/18:2)	15400.78	20218.25641	20472.99556	9157.072464	3983.665309	19902.13183	4638.82739	14008.86744	9131.895256	6122.158382	3630.222484	10872.52488	12991.27229	14008.86744	6452.380692	11536.94911	2459.325704	12298.52773	35797.74348	8066.728871	0	4093.136596	13056.24046	10669.15908	8081.431115	11638.44553	3333.750301	9913.949776	13503.39811	6121.045713	23602.77637
PI(20:0/18:3)	868.7411894	592.0099157	0	0	0	0	558.2316699	0	0	0	0	0	0	0	0	0	582.1033115	0	1242.835958	0	0	0	0	0	0	0	0	0	0	0	1177.078291
PI(20:0/20:1)	3557.948217	5656.916951	2895.910331	7185.922904	0	5823.960544	0	1732.779537	2283.496407	1391.896626	865.733051	4445.472945	3892.153005	1732.779537	4205.654146	3418.83973	2618.68122	1152.739358	3638.810307	3433.346153	0	2665.560239	5162.814617	2901.710579	1917.695326	3519.141503	0	4450.396031	3458.466278	1310.135548	5882.471392
PI(20:0/20:2)	898.4154855	2827.278556	1611.700025	1244.769955	1147.169992	5596.451599	901.0498219	1154.507693	2791.176763	0	834.9436348	3470.207372	2708.985056	1154.507693	1171.666763	1110.786018	590.5603157	1105.499952	5342.535054	3032.194104	0	0	2336.533258	0	2491.305033	1736.280875	0	2259.967345	1949.670904	0	2317.84749
PI(20:0/20:3)	2124.443496	3213.697147	2277.974944	0	1792.825128	1372.955474	1230.941354	4393.267992	954.7208109	1679.758432	845.7462278	1274.598958	4262.324006	4393.267992	3899.818721	3913.964672	0	1387.912905	2530.989499	1971.39694	0	1789.851304	1806.922839	1419.144434	0	6097.35772	0	971.6501574	1858.094178	2255.316765	0
PI(20:0/20:4)	12727.53828	17037.49451	12657.46811	4930.783003	2803.398302	2951.327974	2734.915523	5271.039477	3692.259452	7808.535458	1328.994201	6780.371147	5727.879973	5271.039477	3626.958604	5882.587035	4457.154699	7894.377398	12912.84326	3350.703158	0	4847.235971	7827.990028	6849.69066	7074.614775	4859.640702	0	4129.087013	4855.82931	1802.812966	8258.271605
PI(20:0/20:5)	0	0	0	0	0	0	0	0	0	0	0	0	0	0	0	554.6514433	0	0	983.7172973	0	0	0	0	0	0	0	0	0	0	0	0
PI(20:0/22:5)	804.0444688	558.4842392	0	0	1086.051852	0	0	0	0	0	0	733.808254	0	0	0	1160.233046	0	610.7153772	1863.234021	1209.569156	0	637.637382	0	911.1772143	0	1186.006769	0	545.2183481	2446.473524	0	0
PI(20:0/22:6)	0	0	0	0	0	0	0	577.8499305	0	665.1068306	0	0	802.3684701	577.8499305	0	0	0	1417.838375	0	0	0	0	0	0	0	904.494753	0	0	0	0	0
PS(14:0/14:0)	0	0	0	0	0	0	0	0	0	0	0	0	0	0	0	1132.839916	0	0	0	0	0	0	0	0	0	0	0	853.9174415	0	0	605.6809749
PS(14:0/18:1)	1041.271109	871.2023222	0	846.6732765	794.4530916	175.9525329	1458.660615	3633.833287	481.8803951	0	498.3769051	689.6682279	0	3633.833287	0	985.6279689	841.5599311	0	561.3728844	512.1740979	835.9723326	441.3037861	0	0	0	1528.770044	0	0	194.5739312	132.8579651	834.6807674
PS(14:0/18:2)	1845.391831	6084.030395	3994.185089	2277.274326	1707.864258	3172.322626	2912.473884	1803.630937	3831.906674	1196.587955	582.4239551	2873.254104	3208.569015	1803.630937	0	3248.347294	849.5571663	2068.556123	2636.980361	1178.572458	0	2060.966316	851.7202474	852.6793165	2555.329908	2121.442175	0	2924.097264	1825.014098	0	2315.235411
PS(14:0/18:3)	711.802317	0	0	0	0	0	0	1181.015088	0	0	0	0	0	1181.015088	0	227.7636854	0	0	0	0	0	0	0	0	0	0	0	523.0224044	0	0	1195.15801
PS(14:0/20:1)	0	0	0	0	0	1830.956819	0	0	0	0	0	0	0	0	0	0	0	0	0	0	0	0	0	0	1077.975018	626.1648566	0	0	0	0	589.6494566
PS(14:0/20:2)	785.4783871	586.4273718	959.9765821	0	0	0	0	0	0	0	0	0	0	0	587.6930781	0	0	0	0	0	887.701856	0	0	0	0	1180.804749	0	0	0	0	307.1823984
PS(14:0/20:3)	0	0	0	0	0	0	1393.342373	0	1511.518971	0	0	0	1012.316425	0	0	1038.992988	0	0	0	0	0	0	0	1375.511907	0	1577.29243	0	0	0	0	468.9788873
PS(14:0/20:4)	4372.561821	6984.523604	7203.765083	3799.326139	10186.45502	4478.361005	5535.838996	7299.096936	7338.774983	0	4047.979938	10223.08835	3031.768313	7299.096936	16928.84761	11043.50018	7273.655798	5775.838898	13100.97132	5371.769657	0	7158.590495	11572.18384	5974.167593	4114.368206	4182.076148	7052.422226	7971.868766	6297.099151	0	8245.684411
PS(14:0/20:5)	2589.187356	5732.863079	0	0	2620.645623	2073.799818	0	0	2514.03523	0	0	1554.048674	1720.261745	0	0	1510.575228	0	1013.902592	2067.959574	0	0	1041.64283	1570.66114	1049.122943	2091.750897	1568.332284	0	0	1549.527031	0	2097.925527
PS(14:0/22:4)	3145.002015	2483.41317	0	0	1953.166187	0	0	1044.518903	0	0	0	1555.655984	1072.725384	1044.518903	0	0	2584.578986	0	1550.646535	1405.211873	0	1557.779199	1540.400729	0	3617.448592	3136.811455	0	1762.704611	1521.616603	0	4181.227367
PS(14:0/22:5)	6385.739414	0	1274.206348	374.8773178	209.151467	0	1330.901598	3185.736838	662.7570992	0	261.3397841	0	223.0656876	3185.736838	0	221.3148362	370.4237931	450.6690324	1062.496724	413.0447512	0	442.5186455	396.5514707	277.3801964	411.2407301	1407.438214	258.2953261	133.1827688	257.9978286	0	1937.970038
PS(14:0/22:6)	0	993.8376807	0	0	956.1817975	1198.20054	0	0	0	0	0	0	1029.731444	0	0	0	1225.340496	2218.043633	2488.871336	0	0	0	0	0	975.7251957	0	0	0	0	0	0
PS(16:0/14:0)	0	0	0	0	0	0	0	0	1468.483121	0	0	528.696564	0	0	583.7720001	586.7984738	0	0	0	0	0	0	0	0	0	846.3167024	0	881.3519522	564.336507	0	0
PS(16:0/16:0)	2385.853267	0	0	846.0730948	819.9295197	0	830.8161496	0	1181.541072	0	0	791.4441017	1042.459365	0	578.1671264	591.2889864	873.1499147	0	2247.434051	1296.428504	0	1308.405225	849.8843996	1121.748467	0	1190.622132	0	0	0	0	0
PS(16:0/16:1)	0	551.9501923	0	0	0	0	0	0	0	0	866.2056384	0	0	0	0	0	0	589.086841	0	590.0005458	0	569.046395	0	0	0	879.1963398	0	586.8448596	1465.616234	0	0
PS(16:0/18:0)	21061.17609	19385.15084	9762.276646	11291.46053	29679.98891	18296.26544	7026.984389	11416.33189	22369.1933	5601.050806	7303.177689	15543.14263	12748.19355	11416.33189	2596.151818	10002.33739	8719.440589	8632.684991	24919.03184	12166.93448	4189.078309	11024.91892	10842.85674	60831.25224	5708.914168	9431.015029	4696.440728	7794.409394	8291.990254	10455.72807	18314.39875
PS(16:0/18:1)	2061.78292	6814.853339	5733.918064	2058.416969	3123.992683	2082.668545	4105.126345	2277.750043	2493.400896	4066.674065	1495.461825	3493.543093	6318.124734	2277.750043	2257.451382	0	0	1986.630464	5721.488456	3287.704252	1576.302092	5049.5792	2164.541013	2357.490457	2573.498576	2915.80846	1248.745657	3359.446427	2196.274698	3066.454103	1107.174182
PS(16:0/18:2)	4517.357512	2020.913073	1544.405821	992.1384966	2909.610601	2528.176791	2022.500703	1408.443091	4182.292484	0	0	3899.715175	1412.698621	1408.443091	0	3156.065901	4116.406169	3863.34692	2440.721061	2015.172679	2569.386967	0	4815.336697	1992.256746	2545.815226	4681.843493	1864.425883	2883.366332	1965.590658	1030.763525	3119.540907
PS(16:0/18:3)	1568.454127	0	0	0	846.1342107	0	0	1103.413159	0	0	555.8799785	0	0	1103.413159	588.1839487	0	0	0	0	0	0	536.1860878	0	0	0	0	0	0	0	0	1044.523467
PS(16:0/20:1)	1234.099936	0	1458.222147	987.4615789	0	2225.608521	0	1560.712397	1263.359718	0	0	0	1734.159803	1560.712397	0	1207.421832	0	0	0	2361.141169	0	0	3890.543868	0	0	0	0	0	907.338601	1114.644058	1030.923401
PS(16:0/20:2)	0	0	0	0	0	0	0	0	0	0	0	0	0	0	0	0	0	0	0	0	0	0	0	0	0	0	0	3059.338973	0	1215.736045	1051.937156
PS(16:0/20:3)	0	1879.308988	2023.19662	0	0	1558.274569	0	0	1044.825098	997.2290765	0	1044.856704	0	0	0	1534.78437	0	1381.286201	3588.127559	1037.077885	0	0	0	0	1552.308402	1531.272772	0	1848.74911	1002.618828	0	0
PS(16:0/20:4)	19905.31026	22393.41444	9645.063019	6980.764456	4312.170561	9241.511273	2059.125096	3978.874964	12134.29701	7095.017845	4532.826165	9171.730591	13071.92962	3978.874964	9118.014173	6859.875484	6277.644126	8828.440325	12246.89688	7653.367889	1042.668722	3993.808975	18215.28866	9354.278388	8138.312793	13660.73699	3036.70398	8253.978456	2666.293132	2059.618179	8367.9963
PS(16:0/20:5)	2299.424888	1533.951996	1561.607368	1912.056704	0	0	0	0	1564.666906	0	0	0	1574.503236	0	849.5205869	0	1547.004161	1408.083474	1540.342237	2547.059618	0	1515.128958	1550.850832	1016.317649	2080.880675	0	0	1403.476334	0	917.0462738	3133.800093
PS(16:0/22:4)	1447.662621	2375.387021	1506.969869	0	2058.917449	0	935.0931006	0	0	0	1086.09293	0	0	0	2055.462899	1089.853443	0	2373.013887	0	0	1540.214017	1560.160262	1898.995434	0	0	2314.228607	0	2085.717224	0	0	2570.974673
PS(16:0/22:5)	1572.410621	2766.378165	1637.056443	1017.960792	1543.643951	3738.928037	2067.862217	4366.811288	943.979006	0	0	3050.144721	0	4366.811288	1101.403772	1947.462202	1061.618256	0	1236.497498	0	1561.710793	1608.026741	1580.662904	1020.00164	1028.668846	1338.889322	1469.182158	0	998.3759805	0	3104.273347
PS(16:0/22:6)	2088.763385	0	0	1200.309777	978.8107505	0	0	1895.775151	1856.290476	0	0	1215.638864	0	1895.775151	0	1469.759233	0	0	1730.512018	0	0	1559.360387	0	0	955.6830214	1454.322299	0	0	0	0	4351.142095
PS(18:0/14:0)	0	0	1545.724992	2058.936443	2057.98717	0	1026.243752	4716.149042	997.4730552	1495.031514	0	1016.099255	0	4716.149042	996.8677669	1137.202859	3087.186953	909.014524	2571.235552	0	0	1512.753583	1542.148731	3567.568353	0	440.7912632	996.0142911	0	1000.405459	0	2092.012451
PS(18:0/16:1)	1565.036637	6397.340381	4647.958853	4984.256639	18326.17158	1593.930143	0	4514.879123	1991.388691	2008.757703	2037.027026	7645.330923	5458.795266	4514.879123	2506.490819	1505.771843	6711.981148	4512.36443	7109.785372	3773.467608	0	7099.780362	2055.299366	4640.648083	1547.400721	3884.552184	2018.510206	5617.630999	2506.978586	2452.346165	4180.879141
PS(18:0/18:0)	505748.2502	1085389.14	490939.6558	742534.3188	910618.9034	449853.1611	366656.604	1240780.955	272338.4956	493164.5034	394938.6387	746354.2021	839468.217	1240780.955	377869.8493	398322.0557	564237.1195	238521.6633	685603.1035	471349.8473	24455.29102	855753.6946	647164.6679	1258779.626	155833.6957	899673.1886	123336.76	608965.2015	347426.7462	155850.6869	714356.5191
PS(18:0/18:1)	53652.71646	128782.1872	78959.67015	84653.10156	102308.1096	51769.54719	51085.19522	155413.3936	39750.7343	53735.88727	30366.77713	89332.36607	110316.2809	155413.3936	50280.42317	77430.87541	62236.71784	33753.1675	120139.7814	57421.76435	11973.07357	84039.28669	116133.6553	86585.62028	37240.17898	98462.95861	31346.33395	82435.93676	35843.78607	23419.57801	84215.49308
PS(18:0/18:2)	10985.02766	21065.28204	33147.21577	11920.00617	10993.39973	21755.04373	9118.656359	21691.6989	9690.107256	8296.536902	3833.589596	10424.51638	26143.97774	21691.6989	10197.93385	14783.88805	4581.980965	10045.74894	27638.13853	11212.5333	1040.447318	8855.166356	24063.08389	19313.88518	13475.53082	8227.928565	11207.66316	6836.278501	6166.725782	4160.088586	12655.25596
PS(18:0/18:3)	2224.829006	1319.843172	1116.06137	1507.236161	1983.613217	1706.719432	1164.039354	3221.246656	1608.102801	2039.13534	1103.362051	1409.309075	950.8171564	3221.246656	2560.766238	1290.07251	840.9231054	1948.67372	1524.463236	1890.592856	1115.573919	1625.121446	1621.252035	1053.487595	2155.109244	3007.67626	1345.881814	1633.921027	2534.052875	2218.654283	2960.69505
PS(18:0/20:0)	40940.52878	56631.44793	67798.62126	44863.13018	116595.68	63452.2756	12054.47765	61949.87378	34588.20799	12497.2269	26393.92089	40315.43577	44691.81782	61949.87378	32154.92743	23848.9947	25490.44976	42428.47828	58182.54692	94223.31064	821.1299507	60957.53749	51789.83869	37106.64594	17851.54879	58442.54919	11652.91727	35634.98116	25097.67181	6518.539402	66586.8211
PS(18:0/20:1)	2082.853443	14061.98484	2423.212462	5194.674459	2286.702961	4690.63582	1555.395379	2092.939009	5089.054677	7248.627236	0	5214.481529	7297.334075	2092.939009	2589.687768	3099.296892	4273.164946	1445.272427	9871.275601	5212.533523	0	3644.565223	6755.630539	2079.992513	0	6266.166542	0	4675.10607	1026.20683	0	7122.842058
PS(18:0/20:2)	1567.646574	5729.886481	5197.636512	0	1557.187725	0	3111.751275	0	0	3605.42286	1552.147201	2084.555528	0	0	0	0	0	1043.469599	2045.834164	1023.022157	0	1893.62768	3972.212887	2073.163731	2596.796524	6796.160244	0	2362.148924	2073.08639	0	3132.713975
PS(18:0/20:3)	343912.8114	416186.5249	357086.7681	368327.8199	283544.9054	369266.2542	179873.8837	363487.9279	366299.972	263006.0108	299467.6452	353948.7474	369074.0239	363487.9279	343017.4347	371575.1422	305334.5926	473426.8994	682921.3062	815075.0009	198682.0667	213918.1728	495061.5391	407657.4886	434810.8996	363432.0447	346098.447	399540.3482	361629.5433	280825.9951	451365.6892
PS(18:0/20:4)	19882.05093	38180.05971	13619.01117	11976.50327	8832.718926	20055.11086	3524.187226	8763.55051	13763.13501	13018.43919	4549.192428	17228.83464	31755.80462	8763.55051	11409.57804	11613.70398	7801.652033	21605.5181	33601.31013	15827.88175	0	18874.67828	24067.05056	22882.03065	7883.982605	21524.23469	12518.75463	26903.85951	11004.96389	2574.976945	23875.25945
PS(18:0/20:5)	2758.180625	1889.121104	0	0	5935.79959	1502.616753	1313.907976	1766.158662	1492.539925	1568.305373	1223.844321	0	0	1766.158662	1238.634239	832.2754273	4625.143115	770.8717054	2662.649685	2684.87768	0	2397.358791	0	0	2174.33173	1304.657888	1719.526295	1140.37069	1934.539092	1894.287896	8266.084961
PS(18:0/22:4)	3766.806103	2081.178501	1886.296043	2781.457628	2170.181225	4734.776217	0	442.6667262	1617.131874	2058.819554	835.0213569	1809.363937	2723.024851	442.6667262	2146.403599	1360.967505	1734.077993	3872.653002	1773.836249	1544.117766	0	1919.364506	2937.989779	2302.812714	2636.403472	1080.506703	2108.897166	2820.582642	3712.234699	1565.456166	1122.642464
PS(18:0/22:5)	64608.04001	61729.1168	36373.06344	37201.82585	30913.30803	54459.77001	33610.00024	39786.42147	33758.23041	29691.4944	30399.59603	23379.75597	52837.11249	39786.42147	36689.19037	43171.4481	78849.02321	37111.8582	37032.28082	63307.00656	20023.31153	14348.08044	42965.11822	40718.88716	27758.21369	31371.35837	31760.29668	45096.7367	59395.79319	25679.50356	40855.07379
PS(18:0/22:6)	1021.689154	1564.241213	0	2056.80164	1573.31023	949.3017457	0	2188.361722	2020.210193	0	0	0	4205.517562	2188.361722	0	2986.381578	0	0	4655.933408	1030.865688	0	1570.274445	2109.842957	0	1505.166618	1060.020541	0	1887.587366	1009.048947	0	953.7331892
PS(18:1/16:1)	17285.18208	8691.825992	5110.673614	980.8906599	8985.641242	1961.566139	4912.90017	5401.653486	8398.143265	3670.853	1186.018409	4713.749198	7239.929533	5401.653486	2162.5245	2557.948597	5117.140619	6595.047658	7357.474545	11165.58091	5312.427023	9689.275673	8209.788575	4380.353057	6166.801812	14905.12297	4613.473968	7438.763029	4958.613503	5047.535366	6103.958082
PS(18:1/18:1)	2821.811833	9827.71178	3519.877878	3931.484163	4461.113245	2524.044599	1016.528258	922.6316704	6205.198947	3358.748335	2692.002636	3209.611453	8811.923671	922.6316704	4048.66703	4732.194238	0	3074.683012	9803.03807	4668.829249	1415.609402	6624.726579	2982.234504	3242.042893	3645.476016	4702.694026	4026.139997	4537.497456	6065.322731	1023.256431	2977.131156
PS(18:1/18:2)	16319.25784	9137.50132	6165.947097	2373.843751	6261.27869	10664.26054	6678.466529	12296.36562	18346.35394	1256.781172	3520.562636	4882.077902	11067.90266	12296.36562	7547.619788	9707.552738	4534.41715	12659.25951	18001.14781	1750.359626	0	4401.724705	14045.48061	7200.996907	5749.664072	4037.937782	6363.772072	4531.825734	5252.306017	2421.745056	5862.243518
PS(18:1/18:3)	0	0	0	0	0	0	0	1621.677181	0	548.9353194	0	0	0	1621.677181	0	0	0	0	0	0	0	0	0	0	582.2126946	736.0270661	0	0	0	0	0
PS(18:1/20:1)	0	0	0	0	0	0	0	0	0	0	0	0	0	0	0	0	0	0	0	0	0	2574.052579	0	0	0	0	0	0	0	1022.375127	0
PS(18:1/20:2)	0	0	0	0	998.6267526	0	0	749.6591654	0	0	0	0	0	749.6591654	0	0	0	0	0	0	0	0	1449.415283	0	0	0	0	0	0	0	0
PS(18:1/20:3)	3837.596712	15655.26465	1529.405384	1048.885796	0	1564.341728	1554.066168	2064.779707	3103.97766	1016.204183	1919.940918	4548.191927	3075.076744	2064.779707	1547.460157	2062.274831	4142.65779	1551.816784	3423.218966	2439.875708	0	4792.765925	1558.224686	1805.30425	2720.798974	1722.889006	0	2055.449371	0	0	1290.426747
PS(18:1/20:4)	68408.33373	97048.34629	33245.50704	22140.09487	28037.02369	30496.00832	13189.66194	24068.41149	52974.40197	21290.56612	10112.79832	44215.53938	60956.51224	24068.41149	25404.6211	45342.01796	29187.25349	47528.36682	64633.04288	40658.53086	3347.104755	33709.39095	80820.29876	48521.29443	31698.78285	59850.89529	17491.83298	53299.48402	44205.01008	5384.940893	40212.10848
PS(18:1/20:5)	2896.217583	5210.834452	0	0	3673.68112	0	0	2058.627548	1578.488858	0	0	0	1548.413645	2058.627548	0	2581.559103	0	2467.547197	8363.918103	2077.959773	0	0	2096.640845	1536.07563	2594.579815	1042.460308	0	0	1555.939696	0	1047.385425
PS(18:1/22:4)	8819.453358	0	0	0	2545.696828	0	0	0	2998.663127	1044.420543	0	0	0	0	8849.64965	2573.862922	0	0	1544.29282	0	0	4633.707167	0	0	1004.205214	10487.74299	0	0	0	0	2063.865073
PS(18:1/22:5)	12844.77495	7820.552319	3624.684696	1011.382179	1515.518964	5195.112469	0	3647.533135	5009.312108	1044.208723	1033.604465	4965.949087	2494.333395	3647.533135	1007.242164	4355.50842	1564.674658	1310.120706	2591.462626	3646.777339	0	1607.952359	7016.147544	2634.104145	1927.617811	4326.724646	900.1156179	3641.543131	3777.365726	0	1352.15386
PS(18:1/22:6)	12004.01068	12657.81162	7327.466921	3331.770344	2237.848681	2611.811209	0	2147.641998	8202.240751	2046.330938	0	4358.234432	6332.895787	2147.641998	2975.357662	5518.680704	3622.269103	4173.227285	14423.04879	6780.652148	1555.936801	4171.040879	10037.8884	9248.369338	3240.714812	2289.56948	1564.091023	1205.967027	4682.923303	2103.921516	3758.955232
PS(18:2/16:1)	15775.46696	21227.83725	20873.78576	10817.81325	7509.078422	19597.39646	16332.15535	16087.34491	16973.74695	6661.213563	7483.627642	17404.10196	20206.50989	16087.34491	8133.100758	7466.736738	12929.46759	18122.1084	31092.53371	10482.74473	2021.192435	10329.14685	39951.7358	10108.17913	16932.81429	19145.18599	4297.95491	20442.53254	13169.31028	3796.508154	17579.62422
PS(18:2/18:2)	23602.35918	34477.5938	65195.2567	20834.2888	20954.84814	46962.38454	19924.85379	30139.65411	33346.47714	15542.52235	6330.597763	29171.59445	32437.0727	30139.65411	26999.78319	21692.15797	16674.66227	47744.78124	42563.72755	22192.15893	3127.531583	12758.74886	13973.09243	16105.25027	31328.60491	16173.29916	9886.859728	22466.58598	29484.26866	13329.77822	13880.41251
PS(18:2/18:3)	625.9294737	0	0	0	0	0	0	0	0	0	0	0	0	0	0	0	0	0	1084.502831	0	0	0	0	0	0	0	0	1421.118329	0	0	804.7526417
PS(18:2/20:1)	0	0	0	0	0	0	0	0	0	0	0	0	605.8878033	0	0	0	0	0	0	0	0	0	0	0	586.4917988	0	0	0	743.4894209	0	0
PS(18:2/20:2)	0	0	0	0	0	0	0	0	0	590.0693461	0	0	0	0	578.410221	0	0	0	0	0	0	0	0	0	0	591.6424778	0	0	0	0	0
PS(18:2/20:3)	9900.181898	12511.50969	14230.50157	1578.774079	4162.409253	4493.695032	4663.388977	4149.181548	8508.870038	1263.692896	0	10474.97991	7319.350121	4149.181548	3362.801055	3216.274522	2060.641744	13534.66604	5914.705661	2591.53543	1049.214756	2797.671707	17512.13752	3234.610135	4162.041797	4965.91786	1442.967441	3872.398401	3248.162145	1042.501358	6153.327957
PS(18:2/20:4)	86657.89324	106485.8589	130818.8525	24446.18947	55242.59802	41048.96725	14354.86981	15077.63984	68974.82517	30807.39917	23502.39846	49301.9254	83558.73261	15077.63984	64725.97791	59904.21603	30842.36031	86719.8702	75033.64289	74244.39093	3617.275712	48335.98025	156961.5773	38022.29854	38461.95716	87728.58794	20031.70793	110936.0166	57864.89564	13270.9157	47933.39977
PS(18:2/20:5)	1545.828634	3585.994834	3934.763379	0	3806.248273	796.8528855	2090.527777	2504.571692	2101.29211	0	0	0	2399.119889	2504.571692	0	1971.581786	0	2558.729424	6104.069544	1578.333483	0	1568.205668	0	0	0	2099.953574	0	0	918.8051734	1562.338378	0
PS(18:2/22:4)	4950.140093	7820.349017	8012.401593	2088.201566	1924.216235	2472.232669	2530.504617	1550.624787	1958.152851	2092.386986	1518.305022	4597.336863	4281.791629	1550.624787	0	2255.960767	3700.090654	3845.683543	2057.906442	5380.025302	0	6754.851786	4850.574869	4897.509558	1534.719578	2304.65974	1541.926955	3604.872815	2005.055579	0	1787.950322
PS(18:2/22:5)	7572.414261	3246.231716	9029.306332	2630.180729	5637.79369	1905.40248	1070.587987	2401.389708	5090.576038	0	0	3127.730252	6918.672638	2401.389708	3515.778744	4349.716877	2572.162739	3719.523611	7551.256926	3637.654177	0	4738.494634	5465.880747	10050.33597	2440.034066	3108.658135	0	0	0	2025.718907	1824.70222
PS(18:2/22:6)	3245.391639	5879.879121	4312.550153	4598.534197	11172.11607	6311.030345	1979.276205	3909.755887	11583.48775	3334.099035	2335.696338	4605.900757	5605.043364	3909.755887	5307.947901	9004.210062	8206.70923	7908.25846	17292.4442	10663.45418	1028.063051	3765.846315	2180.16678	11990.05364	3900.621108	5003.745429	0	3357.173156	1499.760628	1543.74855	10893.25447
PS(20:0/16:1)	32410.5956	44858.50433	56024.87905	26008.80705	93068.06622	24659.13101	13609.04437	63494.22936	13423.02125	18394.20934	20337.09955	53706.38607	19755.97485	63494.22936	24197.74299	24779.9047	19507.26885	19368.62321	22985.73042	66392.70797	4081.078723	26770.37805	31117.3402	20613.30398	10751.17323	47959.88567	8530.895696	29498.70736	19898.64783	3167.444218	20739.38489
PS(20:0/18:1)	7220.291202	7662.160141	7001.029514	3321.656608	11125.82347	5948.636204	3966.095982	9193.684478	1370.923836	3009.775107	2371.748116	2039.61703	6940.887643	9193.684478	0	3302.382656	11631.17964	7262.997317	2742.803943	5004.186706	0	1525.847045	13196.84102	10643.54419	2322.923566	10831.636	0	2734.667589	4002.524919	2014.840151	5445.391081
PS(20:0/18:2)	345638.7955	673591.4222	855452.6297	413630.4472	212841.8996	736256.0137	277878.4656	431618.0908	320856.6028	296725.9866	159067.7086	705223.912	401486.3149	431618.0908	364177.8696	323184.5359	270317.1213	352875.8313	594823.9314	335681.6011	30831.03343	247292.6966	543481.9198	362133.9211	394709.4256	435441.9022	93650.49116	354850.1091	497532.2531	111129.1811	497468.2939
PS(20:0/18:3)	6095.999384	27929.67054	27587.22487	8230.016459	11617.40719	8590.852212	3586.374108	8685.071132	7355.456046	4411.44198	4775.800742	9886.908059	7902.172138	8685.071132	4347.230102	4833.11675	4649.450683	4119.996416	12496.35408	9838.487419	585.5702093	4925.372475	7091.17228	3820.520369	12310.92891	10459.62917	2847.090961	6850.324141	10225.20998	1104.60493	43128.45121
PS(20:0/20:1)	0	2793.215294	1977.903493	3455.097273	1700.058257	3036.564686	1026.972642	0	2304.355255	583.4507513	0	2740.128119	1961.19449	0	2042.260537	881.3699091	3409.475323	1295.817483	2292.221505	3158.151291	911.6033622	3278.042901	3117.074751	2576.238448	588.2958036	1242.821112	0	4413.070927	1434.342303	1914.764181	3923.289895
PS(20:0/20:2)	8556.94973	11879.11554	20894.08475	5380.503994	7203.773511	8322.393332	6207.390105	13668.342	8788.757655	3181.448149	6490.654124	11325.405	6819.250866	13668.342	9624.629069	5973.051465	5595.460482	4417.218788	11029.45232	8645.690505	1128.559612	13415.88845	12585.16358	6502.061043	10340.2473	9954.672052	4308.680793	2577.06314	6937.274256	1684.029016	7633.389967
PS(20:0/20:3)	46539.05365	81873.9173	126140.8433	31458.35296	39927.45369	46101.88574	21881.94798	47066.3182	30292.99785	16846.3097	27361.77363	70471.37	24077.31101	47066.3182	36418.21138	19905.03179	18263.69365	34657.40188	23123.09974	47612.78265	2260.575937	37452.65598	28160.41199	22033.15052	26282.00188	44032.16043	5321.398495	34784.0704	24836.19707	10663.02501	26718.89105
PS(20:0/20:4)	96099.50627	135585.7657	214958.5216	85305.39195	156645.0475	95566.77093	47532.56874	94370.17438	64849.63333	62997.18388	44854.47297	142290.5853	107293.1272	94370.17438	98648.31161	74644.85108	90109.69416	89867.01629	129943.0299	130069.2949	4247.005844	107519.7551	115173.5035	193449.7237	109632.1583	116758.9195	34006.21779	106505.0751	80569.94663	24519.63954	143762.2647
PS(20:0/20:5)	4645.954864	11219.84314	11692.4665	0	11194.60022	3770.407437	850.1032673	10485.50245	3512.216931	2314.801324	584.9549343	4868.616587	3293.075524	10485.50245	1831.157728	1737.026111	1468.354852	5375.937504	17937.17902	5708.211658	0	5873.948685	1784.932732	10588.60366	0	2783.131667	875.0318321	0	1516.720244	0	1980.195682
PS(20:0/22:4)	8183.549246	6000.241646	14188.4524	3345.578384	8157.764768	4285.65045	1970.330249	3845.317866	3762.679518	2618.453944	2023.327212	7963.025397	5775.178646	3845.317866	8419.333493	3151.123715	4418.016527	4656.570903	7122.083455	8959.345948	0	9442.9106	5951.865266	8008.759893	7303.731221	8922.547185	2578.189818	6795.873023	4468.19353	550.2998968	3625.248256
PS(20:0/22:5)	3104.789364	10580.67719	16596.6381	3942.877959	10396.14661	5656.586233	3579.152726	10242.4336	3348.947693	4778.770717	6652.650483	14375.4677	9225.280894	10242.4336	13732.7325	2388.526833	3503.221295	5348.002247	14282.80901	10389.56345	549.9774186	7709.913525	8059.885274	7220.980687	10263.82141	16871.64278	1624.760115	5353.210542	6201.221042	3986.954222	6741.514364
PS(20:0/22:6)	19041.06967	38606.11505	50844.0919	24305.18524	28439.93628	33386.46595	17003.39562	22107.87601	10110.0104	8952.265786	4787.142212	28027.76032	15587.64566	22107.87601	13911.80507	20680.8072	19594.13723	7771.758352	38479.48848	20908.70871	1108.230673	18941.75709	17438.52659	18521.18354	7314.476898	20696.00558	3371.919418	7818.215122	16075.98138	4060.885165	38963.57794
27 OH cholesterol	1.49562152	0	3.400550638	0	0	0	0	0	0	0	0	0	0	0	0	2.522659823	0	0	2.579839966	0	0	0	2.361091504	7.793919862	2.037768604	2.161250515	0	0	0	0	2.604921181
Cholesterol	9971.991698	9934.233569	9963.620181	9933.446768	9904.421552	9923.795182	9942.328956	9929.256187	9969.964223	9942.920261	9946.762059	9901.906544	0	9953.633789	9965.667748	9966.837975	9952.657534	9950.712415	9965.453059	9943.557444	9948.011908	9941.80352	9940.239171	9892.161373	9957.902554	9945.055414	9967.059077	9972.334303	9969.774311	9919.478231	9966.079566
MAG 16:0	0	0	0	0	0	0	0	0	0	0	0	0	0	0	0	0	1.920113343	0	0	0	0	0	0	0	4.072482083	0	3.019609574	0	0	0	0
MAG 16:1	0	21.06862129	2.484830884	9.864523576	2.1139247	4.468808931	3.12758942	16.30032889	0	4.484062606	0	10.77399284	2023.06119	3.34681943	0	0	6.11885937	3.535984464	0.450466065	10.11357163	8.049821434	0	7.375673761	17.2952221	1.998645635	3.594371966	0	0	0	9.543809008	2.901016536
MAG 18:0	1.279756157	3.948990793	1.827693979	5.717974978	6.593560682	9.205855395	7.656533342	14.08670704	5.087301009	8.100096201	5.213446414	9.354805876	0	4.682377141	3.299479246	2.041919432	10.53619303	4.266040112	8.767283184	2.479735505	7.788754841	3.620537296	3.506251586	6.163282052	0.696024873	0	0	0	0	14.11027766	0
MAG 18:1	2.987615849	7.425862052	10.70880679	20.86738549	29.92704168	9.083308362	5.592521101	2.542372525	0	14.28593833	8.801451738	19.63101433	0	17.2413449	12.99878063	7.33073935	3.142395158	5.627385004	1.989285417	14.41612877	5.224901542	6.454390776	6.017374204	15.34227114	6.937750199	7.646930113	8.70275629	5.093852299	6.288103003	21.72457321	1.751339051
MAG 18:2	4.366435346	4.381903868	1.474980549	5.013518336	7.599501363	13.63432217	6.835299842	5.086711789	0	0	0	2.483610498	2433.706983	0	0	2.522556597	4.249898593	3.267820883	2.223197482	0	9.149046334	2.504071339	5.283696167	17.11465569	3.12854752	3.419025161	5.341871431	0	7.189979809	1.200280192	1.75930972
MAG 20:0	3.797592347	15.1006856	0	1.263052179	0	0	9.400271713	3.052629191	3.71072675	0	6.605632353	4.422393619	0	2.513379214	3.390030397	1.667666703	2.051464112	2.796887974	1.717535482	0	3.233985337	3.579249253	1.996482833	3.11848233	4.072224647	4.06994375	2.320265555	0	0	3.39542119	1.409112853
MAG 20:1	0	3.919713833	2.290472854	2.931699928	11.02914669	3.563216604	3.402332824	3.053205858	2.752428577	5.9772015	2.90602237	5.807099518	0	5.244763456	3.391809456	1.629512462	0.755521489	4.367336116	5.075400957	2.929836628	1.15547279	4.387293055	2.273120152	0	0	5.401556723	0	2.10063052	0	3.602269417	0
MAG 20:2	1.495161929	0	1.527397945	2.327620668	2.565541707	0	3.455437538	3.281127706	2.426329487	2.990857631	0	1.196423042	0	0	3.39181029	3.315370236	0	2.380227638	4.12391	2.080555681	3.057131189	2.585674376	2.314327175	5.191878714	3.05168305	2.092625177	0	0	3.915007722	6.92282126	1.682577584
MAG 20:3	2.989010929	5.730464082	0	2.09049392	8.869066252	3.654305365	1.728941456	0	1.364174144	5.528071038	3.710819228	6.580685337	0	1.793415651	2.664573513	0	1.723975555	4.010564415	1.213822968	2.102868826	0	5.322387512	0.699052481	9.746715668	0	7.46769742	3.019543228	4.75197851	3.452152965	0	1.737482428
MAG 20:4	2.225876006	0	0	0	0	3.480100142	0	3.426285043	0	0	7.125949793	4.838160386	942.5388092	0	0	2.522659787	3.280481367	5.8514057	0	0	0	0	0	3.505077851	0	0	0	0	0	0	1.536695728
MAG 22:0	1.351457873	0	1.799666126	0	2.244631793	9.048189262	0	5.183619149	4.94983988	0	7.425153257	5.349736088	0	6.252439488	0	0	2.124954316	0	0.638138618	2.103741063	0	2.557222326	3.535121879	6.201484078	2.034713479	1.548817808	3.019735441	0	0	3.470549802	1.364124653
MAG 22:1	0	0	0	2.447741883	5.00189732	0	0	0	3.710661785	2.988701853	8.82723953	7.389074316	0	0	0	1.680192688	0.752387304	0	0	3.153737591	4.234082312	7.749125301	2.361091349	0	0	6.378066812	0	0	0	2.430381191	3.642624014
MAG 22:2	0	0	1.526590137	3.893870171	3.35145119	3.654338789	0	0	1.901831545	4.484024788	0	0	823.2729371	0	2.044159707	2.465167357	0	6.784886633	2.579990281	0	1.902487333	3.852043509	5.583852385	7.795462552	0.487465247	0	0	1.948891052	0	2.353784959	3.381421014
MAG 22:3	1.804845787	0	3.051683944	1.043198162	3.355925652	0	0	2.56926642	0	0	0	4.726844397	0	0	0	0	0.953505851	2.349839647	0	1.706581886	0	0	0	0	2.114329444	0	0	0	0	3.642802915	0.754089623
MAG 22:4	1.481928851	0	0.783565792	2.120639526	0.624558858	0	1.694782746	0	0	5.03209265	0	2.950944855	1029.249533	2.474508653	0	1.593127101	0.901876229	0	0	3.153695719	0	3.873254419	2.401656724	0	1.986479038	2.161269113	0	0	0	0	1.735830879
MAG 22:5	0	0	3.968274718	3.893053135	2.580174048	3.302038418	1.685871616	4.469061776	1.901071543	3.208692573	0	0	1628.013575	2.817163188	0	3.870453625	0	0	3.188070284	6.260437364	0	2.584856567	2.359636605	4.76743835	2.632994961	0	0	3.202313706	4.187527462	3.370179881	0
MAG 22:6	0	0	0	0	3.357830574	5.363578421	1.728928758	2.590345132	0	0	0	0	0	0	0	0	1.632887583	0	0	0	2.870214279	0	0.926540133	0	2.037770133	0	3.019609504	0	0	0	0
S-1-P	0	0	0	0	0	0	0	0	0	0	0.184862223	0	0	0	0	0	0	0	0	0	0	0	0	0	2.344738619	4.322301028	0	0.433083166	0	0	1.737409312
Sphingosine	2.732998911	4.190189172	1.535304343	3.078459589	6.364195873	7.746756285	11.36253398	5.102152579	2.231411816	0	2.437364585	12.5886711	1120.156973	0	3.151608637	0	7.197952597	4.049206838	0	5.941665117	5.322194714	9.126374707	10.76585989	3.802736437	2.463828906	4.680730407	4.497532212	10.1349478	5.192917588	4.754618045	5.922479039
