# Supplementary material for: Plasma Lipidomics Profiling to Identify the Biomarkers of Diagnosis and Radiotherapy Response for Advanced Non-Small-Cell Lung Cancer Patients
Source: J Lipids. 2024 Jan 27;2024:6730504. doi: 10.1155/2024/6730504 (PMC10838201; doi:10.1155/2024/6730504)
Supplement: Supplementary Materials — The original data for all analyses in this manuscript are provided in the supplementary document, according to the corresponding subgroups. The corresponding subgroups can be obtained according to the supplementary file name. [file 6730504.f1.zip › good vs bad response RT group.txt]

Sample	57	58	61	62	65	68	72	74	75	76	77	81	82	85	86	87	59	60	63	64	66	67	69	70	71	73	78	79	80	83	84
Group	good response	good response	good response	good response	good response	good response	good response	good response	good response	good response	good response	good response	good response	good response	good response	good response	bad response	bad response	bad response	bad response	bad response	bad response	bad response	bad response	bad response	bad response	bad response	bad response	bad response	bad response	bad response
FFA(14:0)	1082747.504	720446.8869	1002084.272	1044978.365	690822.711	916594.2262	1442970.035	0	0	401530.1811	607953.9646	837341.5884	287819.1925	492709.1522	0	2248152.494	712231.457	368259.6151	768414.0541	287247.3255	779289.6216	2237319.573	1024380.243	972907.5132	1199096.519	0	140941.7394	237225.7148	417209.754	1025647.961	1243163.096
FFA(14:1)	490626.3793	510812.4985	693021.8818	743863.7966	1083257.743	518811.0626	836103.3776	0	0	722436.7095	779079.4103	634563.8599	435994.064	798275.5179	0	674910.042	1059209.772	1641163.344	593506.4224	602965.2047	391979.131	817034.1519	807609.9302	732032.1964	689805.0929	0	517775.8391	565921.4014	659062.5337	515821.4801	528555.0598
FFA(16:0)	11576427.14	14546107.79	5695313.541	13951499.08	15360406.26	4716593.841	21439232.55	0	0	10320786.57	11693797.39	16836708.93	5138577.712	6846582.953	0	23043903.17	14088662.41	4223536.485	5768575.349	6025320.563	7344914.832	15286300.91	9970040.649	6857759.267	5133584.953	0	4396242.42	7095100.274	8730636.524	5094113.825	9743464.233
FFA(16:1)	631634.4604	1258667.552	156438.375	896817.8893	1428027.142	104185.3684	3586309.276	0	0	1286822.049	1431793.679	5250637.924	956535.0263	527646.7431	0	2795892.02	809118.777	78665.07151	194378.9288	1112883.333	1118862.728	3374316.781	588058.777	457261.564	1341066.801	0	356625.2909	1002754.6	1495249.553	249292.8876	411828.4291
FFA(16:2)	298664.3286	314478.5398	368891.3567	728545.7234	453676.2325	91799.10914	282506.9515	0	0	420709.4681	198492.6899	298442.536	231461.7994	300724.5618	0	346835.3857	722157.896	335491.303	215513.6218	368699.9288	363571.651	372204.7549	383170.8769	346356.4121	738219.101	0	272312.5508	324764.4335	209926.1974	359338.554	358876.9747
FFA(18:0)	8254586.994	11847260.36	3928612.617	9277808.613	8169567.91	6142256.223	9553089.155	0	0	9574360.51	8864213.643	9674566.008	5737966.721	5547829.026	0	11462528.17	8442192.018	3804376.94	3507866.427	7862581.407	8043037.468	7267144.703	6347845.514	4098171.805	4936854.897	0	4511762.152	5451246.562	8000841.531	8834580.126	5962124.518
FFA(18:1)	20178494.02	44924411.67	9254260.946	21788848.71	22617078.91	6035769.168	50616234.38	0	0	27624294.25	28976306.83	51332748.64	22355577.57	15348182.77	0	41985693.32	31066696.84	6222336.794	8183063.045	18023214.18	26833176.84	34773361.07	21056966.31	18299100.17	4932361.003	0	13290732.97	21013787.73	23953509.28	12494801.95	4895976.386
FFA(18:2)	14796058.47	22456271.43	5974559.501	14027347.19	13007106.35	3807143.21	37566465.36	0	0	14970071.69	15260341.52	29157616.7	11613540.83	11470468.65	0	25874850.37	14862271.14	5936119.222	4424555.315	10380206.81	14875317.99	14044434.27	15870603.37	9166314.472	4187533.707	0	9172864.924	11016630.17	13837789.6	6431376.503	4201719.577
FFA(18:3)	1442723.325	778933.2948	591459.4863	749029.4955	743237.0914	195503.0942	1740667.321	0	0	690465.0856	889832.994	1514294.287	616172.4676	631531.6344	0	1257311.063	614651.4144	270371.0557	360574.4588	649724.7274	1195175.083	640887.6842	1110006.27	371413.2135	231482.8049	0	605512.2655	417750.8291	712869.8059	434731.1272	587112.1249
FFA(20:0)	1537331.079	1838814.476	2701339.34	1986775.745	2179033.835	2063791.205	1674059.378	0	0	1156282.514	2412748.985	3312879.444	1317341.31	456712.7473	0	482204.5365	1859435.807	1903807.441	1525318.455	1952611.083	1576768.696	757355.4221	2012312.855	2086835.199	2049749.673	0	1090484.558	1457251.808	1575853.096	3203687.589	1166141.342
FFA(20:1)	393034.1904	1530406.781	284169.7296	543262.1942	325115.5915	342654.1663	1011684.657	0	0	442168.6945	512933.4396	1031830.241	457480.356	218291.257	0	895438.5635	989443.7763	155812.5956	174613.6988	518086.9526	761321.5455	616247.5548	746440.302	301203.6884	338539.1826	0	225893.2275	378195.6737	447867.4552	433926.9165	560924.0867
FFA(20:2)	378320.9985	897852.4939	137949.8102	340496.8288	325059.1496	192334.2344	839875.6458	0	0	375211.4368	554065.7622	795471.3499	346374.8849	257943.9948	0	569959.8283	388867.2695	201440.1536	141108.8635	412940.7848	495584.9191	480899.7976	308250.4729	214032.3588	142491.2002	0	257671.682	328610.9607	429950.3425	223709.5079	79047.4235
FFA(20:3)	376313.6416	948297.9512	269179.7542	354014.1499	449942.9782	544200.9305	812918.8196	0	0	368997.7064	643077.2266	916876.241	342756.788	361156.3852	0	637619.4926	443128.3391	359412.7608	302834.2424	919758.6633	484789.2919	398951.1159	377092.4752	309743.402	382294.7449	0	335875.8676	346467.6704	456055.7081	582990.9918	379324.3887
FFA(20:4)	553282.052	1944766.679	383275.6219	428266.757	920199.3965	447515.6427	1072102.497	0	0	772898.1565	1304365.357	1274702.264	476289.4457	468885.2537	0	1020244.131	482675.4311	353820.0488	472701.4166	1309055.152	640975.3842	1415841.638	457546.3036	554665.5417	371989.3977	0	653087.445	904288.5859	1028332.51	447411.8229	237076.7961
FFA(20:5)	168635.9814	202874.8671	292598.5241	204024.4317	222343.2251	618560.3608	200961.8896	0	0	356284.3707	1490541.374	664196.7083	343038.3685	3199987.868	0	260891.683	224787.6154	255159.2333	205828.5958	123487.0572	707180.8194	243695.4601	176922.6244	230645.5793	228231.6937	0	442228.8985	307421.7802	309298.068	634827.8662	343866.2769
FFA(22:4)	195622.3655	982956.1799	115621.9129	217622.9479	324703.3737	144294.2828	640039.1248	0	0	194503.4541	379361.0194	559313.4452	210577.5615	99289.585	0	341384.558	277645.2871	128903.7932	71656.27965	697625.3639	441644.3162	507210.0363	203546.0596	203746.4256	84174.28282	0	181368.6135	331204.2954	330884.1502	187127.3399	54857.79727
FFA(22:5)	197902.6125	618582.8701	347987.2064	114723.3008	320368.7027	95470.53048	702951.047	0	0	224123.273	365008.8961	339095.2171	177795.4775	105180.8549	0	437418.1136	329765.2375	67141.86854	99524.71171	442792.3563	337138.3062	242754.8758	150639.286	200445.3344	112227.0469	0	198406.2502	191891.6532	222070.9167	132851.046	59085.87263
FFA(22:6)	205449.3208	364422.8473	113777.8644	151898.6612	240126.2657	160804.0728	572666.9042	0	0	276448.8058	390751.5843	342224.5123	138558.6079	143229.8629	0	736144.4023	225031.0453	66776.56457	210232.6253	297622.1168	451455.0615	219965.2338	172117.3204	280037.2047	38053.13955	0	211479.6361	185166.7216	240975.4715	174530.0492	103432.3335
FFA(24:0)	1720215.122	27433622.02	15161598.6	3171204.462	24681968.24	2054134.107	961236.1954	0	0	4492667.521	17610646.81	30156300.76	679918.43	3823393.831	0	12135071.4	14297119.76	5760320.956	1221581.498	6672369.37	1495451.356	15041708.52	4976757.57	2542596.066	1853644.033	0	21336831.99	18890364.19	4057251.891	3042801.11	10546983.1
FFA(24:1)	149397.1752	918706.3901	142441.3622	288714.0543	89927.5061	481913.1923	456247.571	0	0	146302.0006	169037.8408	366609.2593	173003.8522	73142.96225	0	221836.8109	517415.2802	180022.3186	68422.64646	499345.3498	430858.3641	227888.7485	277297.4067	157376.8754	43415.72032	0	143325.0394	177217.1865	259337.3935	823609.6314	139121.7519
LPA(14:0)	0	0	0	0	0	0	0	0	0	0	0	0	0	0	0	0	0	0	0	0	0	0	0	346.9782041	0	0	0	0	0	0	0
LPA(16:0)	1579.010458	1988.311496	1346.338677	968.0114525	1447.937836	0	2348.277289	648.1414484	0	0	1082.654529	1254.045812	0	2470.079465	1200.866228	893.1810624	1031.739063	2985.827047	923.7168015	3528.920224	1283.636357	1522.37118	2172.350568	1360.832798	3314.521194	952.5938309	0	0	0	1242.7521	2857.354057
LPA(16:1)	0	0	0	0	0	0	0	0	0	0	0	0	0	0	0	0	394.3789646	0	0	0	0	0	0	0	0	0	559.072755	0	0	0	0
LPA(18:0)	850.5085724	0	0	0	0	0	1020.476524	0	910.3963031	451.0632522	723.4396691	0	0	0	500.5259903	0	0	0	608.7659333	0	0	0	513.9337174	1131.231715	416.7976039	696.7237589	0	0	447.4764213	622.8373063	1730.079359
LPA(18:1)	0	617.0934494	616.0930074	0	0	0	0	447.2266462	0	0	0	617.6258809	0	0	0	0	0	0	0	0	0	0	0	0	0	0	618.9754852	0	0	617.0429158	0
LPA(18:2)	0	0	0	0	0	0	0	0	0	0	0	0	0	0	495.7354301	0	0	0	495.4890048	0	0	0	0	0	652.3550491	0	0	0	0	594.3785767	0
LPA(18:3)	0	0	0	0	0	0	0	0	0	0	0	0	0	0	0	0	0	0	0	313.5795	0	0	0	0	0	0	0	0	0	0	0
LPA(20:0)	0	0	0	0	0	0	0	0	0	0	0	0	0	0	0	0	0	0	0	423.0759644	0	0	0	0	0	0	0	0	0	0	0
LPA(20:1)	0	0	0	0	0	423.4278173	0	0	0	0	0	0	0	0	0	0	0	0	0	0	0	0	0	0	0	0	0	0	0	0	0
LPA(20:2)	0	0	0	0	0	0	0	0	0	0	0	0	0	0	0	0	0	0	0	0	317.3069394	0	0	0	0	0	0	0	0	0	0
LPA(20:3)	0	0	0	0	0	0	0	0	396.2952568	0	0	0	0	0	396.0097368	0	0	0	0	0	0	0	0	0	0	0	0	0	0	0	0
LPA(20:4)	0	0	0	0	0	0	0	0	0	706.2389714	0	0	0	0	0	403.1343843	0	0	0	0	519.4049803	0	618.9597266	0	0	0	0	0	0	0	0
LPA(20:5)	0	0	0	0	0	0	0	0	0	0	0	0	0	0	0	0	0	0	0	0	0	0	317.3060502	0	0	0	0	0	0	0	0
LPG(14:0)	0	0	580.9003817	0	344.6354927	0	0	247.6954051	799.3861266	627.8351913	0	0	352.1030147	0	338.4977475	0	350.1163948	0	0	498.7507418	355.6206353	0	0	0	0	457.0399099	0	455.9087752	0	479.7255326	0
LPG(16:0)	2227.408025	1465.267699	2736.574655	2554.088364	4390.541146	529.7353781	2733.491633	8689.164928	2674.755381	948.9613199	2038.946363	2720.119291	1296.958917	926.818362	5672.820976	2532.607549	3753.008359	2760.215937	779.4692958	1620.121657	1313.004282	2053.744344	930.6513176	2637.831787	4394.446945	9252.879402	2486.582758	0	1166.678033	825.2712959	6705.702291
LPG(16:1)	510.1660868	278.9827209	655.9427023	223.3088863	337.4254128	327.7159298	0	626.4393529	0	245.2848364	330.8584307	478.9953146	565.3797178	556.3522152	425.3179774	588.5233719	522.9001798	777.6077127	333.7176591	437.3089941	0	354.9936146	779.8750698	445.0707016	403.2898083	1736.366038	476.0454887	336.8464628	332.8399235	487.6488038	306.2458
LPG(18:0)	2604.537	4007.465731	6647.028357	4836.124271	4031.498449	3350.700924	4430.130568	3884.320325	2152.50056	3305.310515	3927.205774	3895.716765	2544.821795	1817.867668	3283.081449	6686.623351	3444.198505	3344.575833	4772.950582	2277.256793	5024.088111	3268.931795	4939.220906	5148.961212	3280.427263	8996.841928	4369.020767	1644.526524	2901.87839	3865.127373	3305.390181
LPG(18:1)	6952.691158	8681.142947	23936.25673	17400.05382	7212.725614	9175.968875	15611.71226	11307.13512	8279.789737	15838.19859	14985.40066	22301.6767	9925.660942	9894.520961	13845.59405	21747.3134	9919.883816	20542.87822	8794.628063	20237.97106	11103.50452	22578.09188	15377.6599	16557.27257	11177.5757	16629.68373	9078.233323	10782.14058	14553.99229	25739.25344	23568.46931
LPG(18:2)	4824.299377	9907.494788	11722.20872	7116.935652	9030.956711	4568.706938	5284.137188	11164.664	8162.61076	7380.292829	7632.166911	10338.30583	2247.678341	5295.823969	5933.233089	6093.245868	2971.88358	11002.2408	5520.538307	9324.884881	9658.184611	5548.071332	8994.467376	9833.148197	7296.568584	5975.067147	5925.386513	6414.532081	5935.563902	9683.982312	9829.735855
LPG(18:3)	882.3798948	625.9228322	491.5892917	369.7905604	802.6039916	229.0759875	514.0983587	488.5980143	412.6490287	1035.881486	440.4479425	0	0	1004.747625	0	0	0	1113.517999	0	241.3077208	1333.141077	214.4650216	611.2207208	0	685.0217208	1116.057156	301.5665874	398.4009844	0	1003.231993	867.8405139
LPG(20:0)	462.5522072	285.1968197	171.9490707	0	463.1468341	0	0	827.1647155	461.4058872	0	425.8920204	396.8328759	288.1063245	188.6240601	526.8690265	292.306495	0	257.0053427	412.7870541	374.6891909	287.2408992	310.9359195	0	571.8893316	604.448051	545.7795504	431.9393359	261.8585686	0	393.4765787	465.4361803
LPG(20:1)	912.3390586	0	0	0	0	0	0	311.4220692	817.1109695	0	0	0	0	0	394.3015853	0	0	0	0	0	1015.601185	0	0	0	799.267336	288.0116916	0	0	0	1046.490887	0
LPG(20:2)	949.0672959	777.8100789	449.3693148	261.422232	1397.723155	1003.758142	1028.23149	897.393397	769.886229	843.5616647	424.5511422	1155.301073	122.0843356	856.4123837	0	737.3986955	1126.887421	2204.009302	273.155761	545.8543214	723.564997	567.6663821	884.057891	843.1827692	530.3375134	952.2267279	0	0	0	504.9098202	741.4940257
LPG(20:3)	824.6746466	1119.774779	1050.453461	0	1004.511474	382.7799287	0	957.4267889	664.3475913	625.8530512	211.7022021	0	0	494.367699	1195.192988	213.1055703	698.1411279	1234.503734	0	0	405.5549852	290.7132644	239.5181583	538.0850064	686.3834721	679.3907825	689.8532012	871.5954258	633.0142485	730.1921926	573.1870866
LPG(20:4)	337.6625663	869.4059047	0	503.4875886	0	247.8960445	551.5851696	978.1606728	441.7376611	565.9975949	0	679.8517081	322.2722343	0	0	963.4539252	610.364353	1436.419767	563.5091296	2115.422537	0	391.6583418	597.2510724	774.7743183	838.5002901	0	0	0	414.9047024	549.2584118	336.4220252
LPG(20:5)	400.1014318	309.3015701	1131.644594	266.2923257	686.4655908	1161.291219	271.1211234	570.5786956	779.8868971	298.2835662	444.5330977	313.6839277	791.2533718	405.2773067	383.050464	277.0645759	266.03348	320.6086797	482.803532	0	393.0232524	257.4489761	396.6417856	619.2007705	417.4012511	989.4021201	230.3855135	381.3255772	363.5383564	299.1189802	253.1354759
LPG(22:4)	259.944904	721.9117072	674.5234627	416.6975846	625.840755	556.0684894	506.416205	329.8531247	773.2186891	0	163.402894	0	423.3795147	574.999238	386.7837462	223.0367532	315.1756426	973.5211512	428.8220793	997.8253309	512.5347246	371.8386611	0	636.3047436	649.4939287	346.1313164	270.5265085	449.4182876	791.0974762	518.9446699	0
LPG(22:5)	660.2809071	867.957163	0	716.2354326	674.6120003	799.74392	432.9089152	362.6593397	484.0145325	392.8228251	592.3142306	411.944957	0	402.4802941	0	822.9247021	1664.969647	536.0046293	658.1219008	739.0659786	612.1054859	335.3665681	765.0599951	798.8432771	553.3158373	724.0477354	424.1963943	267.4195384	0	1168.017839	717.5967896
LPG(22:6)	346.0955816	352.3121943	518.2815887	1046.309113	0	0	496.4183239	0	595.3108233	450.7247414	0	383.0903147	735.1879441	416.5877857	0	0	704.1225465	349.3091769	351.8032521	477.6103566	901.4574183	714.9242419	471.9652632	474.0265055	488.4715735	842.878387	390.1935988	275.2612939	378.4466965	390.0377523	487.776324
LPI(14:0)	0	0	0	0	0	0	0	0	0	0	0	0	0	0	0	0	0	0	0	0	0	0	0	0	0	0	0	0	0	0	0
LPI(16:0)	665.3360729	0	0	0	0	0	497.2475869	562.756597	1775.645241	0	0	0	0	0	1348.366349	0	0	0	0	0	0	0	0	0	0	1980.688254	0	0	0	0	962.4176426
LPI(16:1)	0	0	0	0	0	0	0	0	0	0	0	0	0	0	0	476.7713719	0	315.5782473	0	0	0	0	0	0	0	0	0	0	0	0	0
LPI(18:0)	0	0	0	0	0	0	0	0	0	0	0	0	0	0	0	0	0	0	0	0	0	0	0	0	0	0	0	0	0	0	0
LPI(18:1)	0	0	0	0	0	0	0	0	0	0	0	0	0	0	0	0	0	415.0284636	0	0	0	0	0	0	0	0	0	0	0	0	0
LPI(18:2)	0	0	0	0	0	0	0	580.8714023	417.4027363	0	0	0	0	0	0	0	0	0	0	0	0	0	0	0	441.9290532	0	0	0	0	0	0
LPI(18:3)	0	0	0	0	0	0	0	0	0	408.8573965	0	0	0	0	395.2666538	512.1898416	0	0	0	0	0	0	0	0	0	0	0	0	0	0	0
LPI(20:0)	0	0	0	0	0	0	0	306.7712411	409.1047006	0	0	0	0	0	409.032	0	0	0	0	0	0	0	0	0	0	0	0	0	0	0	0
LPI(20:1)	0	0	0	0	0	0	0	0	0	0	0	0	0	0	306.6096058	0	0	0	0	0	0	0	0	0	0	0	0	0	0	0	0
LPI(20:2)	0	0	0	0	0	0	0	0	0	0	0	0	0	0	0	0	0	0	0	0	0	0	0	0	0	817.8084462	0	0	0	0	0
LPI(20:3)	0	0	0	0	0	0	0	0	614.7329352	0	0	0	0	0	0	0	0	0	0	0	0	0	0	0	0	309.8387688	0	0	0	0	0
LPI(20:4)	0	0	0	0	0	0	0	0	0	0	0	0	0	0	0	0	0	0	0	0	0	0	0	0	0	0	0	0	0	0	0
LPI(20:5)	0	0	0	482.3960283	0	0	682.4188126	0	0	0	0	0	0	0	0	0	0	0	0	0	0	0	0	0	0	0	0	0	0	0	0
LPI(22:4)	0	0	0	0	0	0	0	0	0	0	0	0	0	0	0	0	0	0	0	0	0	0	0	0	0	0	0	0	0	0	0
LPI(22:5)	0	0	0	0	0	0	0	0	307.6313923	0	0	0	0	0	0	0	0	0	0	0	0	0	0	0	0	0	0	0	0	0	0
LPI(22:6)	0	0	0	0	0	317.2188118	0	0	0	0	0	0	0	0	0	0	0	0	0	0	0	0	0	0	0	0	0	0	0	0	0
LPS(14:0)	0	0	0	0	0	0	0	500.0508348	0	0	0	0	0	0	400.66	0	0	0	0	0	0	0	470.3730907	0	0	907.7767036	0	0	0	0	0
LPS(16:0)	1386.020513	1733.815121	2552.195616	1795.483425	2188.300868	0	1297.969536	420.0121005	0	0	0	1405.214812	1413.90427	1268.285109	437.787534	2043.140525	918.4469855	1752.46992	2265.295557	2079.930826	1881.332604	1653.531545	1278.680881	1668.496779	2475.849286	0	1060.461971	0	1065.581988	1389.634844	3632.036386
LPS(16:1)	0	0	0	0	0	0	0	0	0	0	0	0	0	0	0	0	0	0	0	0	0	0	0	0	0	0	0	0	0	688.364113	0
LPS(18:0)	688.4925342	0	1032.024483	687.8529531	491.0063	0	0	680.7746975	0	0	0	1155.041268	0	833.49	1130.64324	777.4332641	0	831.2231973	1352.022223	525.7138251	630.7180301	0	935.1674644	0	1278.209277	0	929.8285212	0	0	841.0585816	0
LPS(18:1)	0	908.9340632	697.0806264	985.2509829	0	0	0	0	382.7062018	0	0	0	0	0	0	917.6838415	0	0	0	505.8167742	0	0	1044.927358	0	982.093394	568.8839508	814.2254784	0	0	811.4470863	0
LPS(18:2)	0	0	641.3788252	0	0	0	768.9460931	0	0	0	371.3582044	457.6883488	0	0	0	0	0	0	0	0	0	0	1282.088057	0	0	341.5402268	555.0777839	0	0	1831.978756	1060.406975
LPS(18:3)	0	0	0	0	0	0	0	0	0	0	0	0	0	0	0	0	0	0	0	0	0	0	0	0	0	0	0	0	0	0	0
LPS(20:0)	0	0	0	0	0	0	0	0	0	0	0	0	0	0	0	0	0	0	0	0	0	0	0	0	0	406.4765557	0	0	0	0	0
LPS(20:1)	0	0	0	0	0	0	0	0	0	0	0	0	0	0	0	0	0	0	0	0	0	0	0	0	0	0	410.5480855	0	0	0	0
LPS(20:2)	0	0	0	0	0	0	0	0	0	0	0	0	0	0	0	0	0	0	0	0	0	0	0	0	0	0	0	0	0	0	0
LPS(20:3)	0	0	0	0	0	0	0	0	0	0	0	0	0	0	508.284326	0	0	0	0	0	0	0	0	0	0	0	0	0	0	0	0
LPS(20:4)	0	0	0	0	0	0	0	0	0	0	0	0	0	0	0	0	0	0	0	0	0	0	0	0	0	0	0	0	0	0	0
LPS(20:5)	0	0	0	0	0	0	0	0	0	0	0	0	0	0	406.8512104	0	0	0	0	0	0	0	0	0	0	0	0	0	0	0	0
LPS(22:4)	0	0	0	0	0	0	0	315.8449346	0	0	0	423.8634493	0	0	0	0	0	0	0	0	0	0	0	0	0	0	0	0	0	0	0
LPS(22:5)	0	0	0	0	0	0	0	0	0	0	0	0	0	0	0	0	0	0	0	0	0	0	0	0	0	0	0	0	0	0	0
LPS(22:6)	0	0	0	0	0	0	0	0	0	0	0	0	0	0	0	0	0	0	0	0	0	0	0	0	0	305.0405724	0	0	0	0	0
PA(14:0/14:0)	0	0	0	0	1034.726234	0	0	0	0	0	0	1011.855596	0	0	1630.091797	0	0	0	0	0	0	0	1044.906285	0	0	0	0	0	0	0	0
PA(14:0/18:1)	0	0	1388.645208	0	0	0	0	0	1575.503478	0	0	0	1025.177882	0	545.761667	0	0	0	1174.596308	0	0	2031.779583	0	1000.749828	0	0	0	0	0	1517.916611	1013.790768
PA(14:0/18:2)	0	0	0	0	0	0	0	0	1058.364158	0	0	0	0	212.7738383	1072.95962	0	0	1371.638556	0	0	0	0	477.8272193	1083.897504	0	0	0	0	0	379.304033	0
PA(14:0/18:3)	0	0	245.9259527	225.1929041	391.0951663	577.3906759	340.4359675	0	1057.087675	0	489.4135597	497.5365556	280.5816978	0	0	0	0	811.1268555	333.6101781	0	0	519.6451838	0	769.9908593	291.5449389	0	0	0	0	907.8903678	0
PA(14:0/20:1)	0	0	230.3467078	333.1473505	0	0	630.26193	0	0	0	0	0	0	0	1085.37264	1472.406328	0	490.6931123	0	0	0	0	0	512.2384126	0	0	0	0	0	0	0
PA(14:0/20:2)	0	0	1051.554158	0	0	0	0	1046.328209	1085.453753	0	0	0	1533.791661	0	943.7154861	561.4632631	0	915.6609473	0	0	0	0	0	0	0	0	0	0	0	0	1044.170663
PA(14:0/20:3)	0	0	0	0	0	0	0	0	0	0	0	0	0	0	0	0	935.1082435	0	2070.348521	0	0	0	0	0	0	0	0	0	0	0	881.2356513
PA(14:0/20:4)	0	0	0	0	0	0	0	0	0	0	0	0	0	0	1045.215487	0	0	0	0	1036.189342	0	0	0	0	972.2731709	0	0	0	0	0	0
PA(14:0/20:5)	0	0	843.9442707	0	0	0	0	0	0	0	0	0	704.6099914	0	0	0	0	0	0	0	0	1568.200398	0	0	0	0	0	0	0	0	816.2007228
PA(14:0/22:4)	0	0	0	0	0	0	0	0	0	0	0	0	0	0	0	0	0	0	0	0	0	0	0	0	0	0	0	0	0	0	0
PA(14:0/22:5)	0	0	0	0	1128.894657	0	0	0	0	0	0	0	504.4987568	960.0595156	0	216.4303212	0	0	869.386473	0	370.5353004	0	0	243.1804413	0	1083.188831	949.4975042	0	0	387.9350226	0
PA(14:0/22:6)	0	727.2440269	0	0	0	0	1189.629734	1094.251692	0	0	0	0	0	0	0	0	707.2226464	1037.251558	0	0	0	0	0	0	0	0	0	0	0	0	0
PA(16:0/14:0)	0	0	0	0	0	0	987.6543145	1600.988464	0	0	0	0	0	0	0	1242.046883	0	0	0	0	0	0	0	0	1447.927169	1611.665105	0	0	0	0	0
PA(16:0/16:0)	0	0	0	0	967.3255314	0	2056.910337	2102.131502	2708.17818	0	0	0	0	1000.556232	1079.438652	0	2510.257127	0	0	1542.896675	0	0	0	1598.111055	0	0	0	0	0	1553.480901	0
PA(16:0/16:1)	0	0	0	0	0	0	0	0	0	0	0	0	0	0	0	0	1491.083072	0	0	0	0	0	0	0	0	0	0	1149.572258	1264.223478	1102.894179	0
PA(16:0/18:0)	2505.2552	0	0	0	0	0	0	1365.7484	1565.437125	0	0	0	1004.644801	0	1071.34336	0	0	0	0	0	0	0	0	0	0	2629.045422	0	0	0	0	0
PA(16:0/18:1)	0	5015.481713	854.8957736	655.5502061	0	1147.719962	5660.615481	3647.587097	2096.242035	2061.292853	1169.01842	3075.627892	872.6271785	1181.788216	0	1661.701541	0	0	1068.432302	6260.34664	0	0	0	0	0	1024.50223	0	0	1166.07756	1148.313818	0
PA(16:0/18:2)	1573.492116	0	0	1324.112263	0	1087.919329	0	0	1629.863959	1551.041993	0	1009.935442	0	1488.370166	0	999.3418112	1534.859451	0	0	1041.039275	1572.744417	0	1412.724357	1018.629848	0	1500.467947	0	0	0	0	1004.697394
PA(16:0/18:3)	0	0	0	0	0	1172.027547	988.5665436	0	0	0	0	0	0	0	0	1278.03529	0	0	0	0	0	0	0	0	0	0	0	0	0	0	0
PA(16:0/20:1)	0	0	0	0	0	0	0	0	0	0	0	0	0	0	0	937.1307246	0	0	1303.427995	0	0	0	0	0	0	0	0	0	0	0	0
PA(16:0/20:2)	1030.313871	0	0	0	0	0	0	0	0	0	0	0	0	0	0	0	0	969.5387359	0	0	0	0	0	0	0	0	0	0	0	0	0
PA(16:0/20:3)	0	1004.438843	0	0	0	0	0	0	1075.214731	0	0	0	0	0	0	0	0	0	0	1042.952979	0	0	0	0	868.927421	0	0	0	0	0	0
PA(16:0/20:4)	0	0	0	868.1827439	0	0	0	3132.190413	1065.647653	0	0	1560.097559	1576.418413	1358.262448	1041.897981	0	0	0	1568.936376	0	0	0	1051.730457	0	0	0	0	0	0	0	562.1808215
PA(16:0/20:5)	0	1567.453187	0	0	0	0	1047.143561	0	0	0	0	0	0	0	0	1003.443394	0	0	0	1044.847949	0	0	0	0	0	1068.961012	0	0	0	0	0
PA(16:0/22:4)	0	1054.408396	0	0	0	0	0	0	0	0	1058.52125	0	0	0	0	0	0	0	0	0	0	0	0	0	0	1094.331172	1039.581935	0	0	0	0
PA(16:0/22:5)	0	0	0	1566.364135	0	0	0	0	0	0	0	1035.47959	0	0	1562.996121	0	0	0	0	0	0	0	0	1053.52509	0	0	0	0	0	0	0
PA(16:0/22:6)	0	0	0	0	0	0	0	0	0	0	0	0	0	0	1042.72861	0	0	0	0	1563.080206	1040.438401	0	0	0	1037.58566	0	0	0	0	0	0
PA(18:0/14:0)	0	0	0	0	0	0	0	0	0	0	0	0	0	0	0	0	0	0	1020.21817	0	0	0	1053.443701	0	0	0	0	0	0	0	0
PA(18:0/16:1)	1540.923358	2578.627714	5269.869813	2561.526312	8193.669733	6547.637043	1840.557215	1047.334268	2097.203292	0	0	2019.1708	1018.572607	1494.700528	1558.834448	1495.660573	3059.807143	1893.335526	4847.946885	4784.758903	3016.022682	4112.189176	1520.261746	4552.396101	3949.393576	4695.295566	0	3435.153125	2492.78982	2019.508663	1511.989921
PA(18:0/18:0)	2055.7673	3295.835432	1511.08743	2123.867038	1513.637304	2025.178034	0	1007.987274	490.7524673	2465.006117	0	2028.30527	0	1471.58986	0	0	3605.005843	4508.043109	4627.979182	3811.246828	4072.619237	1543.940778	3806.658067	2020.903138	4640.456416	3125.092865	0	3491.506868	2000.24584	8638.449041	2562.984627
PA(18:0/18:1)	48843.63835	101499.3156	100705.6923	132333.168	87675.91015	85787.53294	85025.5219	162252.9846	80950.25439	62551.64444	37408.887	105336.2086	52062.63917	104020.8956	66361.2906	70085.91112	104376.2575	163997.6473	247245.3365	177230.4623	118678.1172	70509.49798	109022.6944	66872.65157	159875.543	122057.6159	38307.22805	61052.81775	69485.1712	158146.7295	84276.40173
PA(18:0/18:2)	162764.2432	167042.6052	147452.8616	191715.2316	168603.2187	198995.824	146153.6806	474200.0008	173384.5336	159339.3159	66017.23738	179997.0368	147931.1179	342892.732	131837.939	146682.9614	140689.0223	375177.471	488962.2585	454834.9815	354000.7106	34543.53282	309374.3513	102400.9343	446328.9174	252702.7276	95420.65261	47652.79069	80888.8748	422784.1672	337718.2146
PA(18:0/18:3)	1838.561609	4299.078547	2526.526477	3603.34706	2538.855375	1008.948964	0	2796.947084	4198.376396	2998.547103	0	2037.234222	1491.129826	4483.550717	948.9914573	1494.994269	2212.927346	6577.863716	5873.997785	5046.916541	1012.20718	0	2632.793372	1008.763642	7353.080184	5793.363179	4291.014423	1992.998751	1994.01986	3033.586017	9667.869728
PA(18:0/20:0)	1408.353174	0	7425.180941	3102.913513	3027.464675	0	2068.65942	8055.016443	1950.984275	0	1015.304531	3530.889846	1533.284085	2381.549362	1457.526895	3093.494186	2581.312698	3046.879703	3881.502909	0	0	0	2360.235592	1529.21461	2878.51377	3946.927688	0	0	1042.113971	5753.783872	3973.775781
PA(18:0/20:1)	0	6115.563421	0	4124.230158	924.1575404	6736.318943	4141.926308	5750.941552	5750.570022	4517.071322	2008.525425	2063.541165	1521.876561	2044.4426	1041.531294	2512.586571	1768.201354	5082.701387	4386.367337	5105.658177	2548.100549	2575.590228	2309.767051	1523.132579	8248.342771	3136.392727	2504.746657	0	1008.370921	2062.349014	0
PA(18:0/20:2)	1549.453721	6111.115249	1976.333285	2552.621742	3983.517005	1436.655661	4652.495575	4312.218783	2611.063536	1495.095728	995.1683725	3600.029749	2018.985411	10145.95144	1536.730494	2506.054916	1934.112895	1476.75217	6580.445713	14789.40599	7208.464143	0	1321.031184	2033.486382	5492.931798	1444.010697	1006.028431	2557.94175	2505.764265	5640.223116	2556.714257
PA(18:0/20:3)	31568.25788	89810.16787	35128.07708	73465.22424	68653.27642	50310.99482	40780.93036	81950.0335	38617.46826	42954.05453	27204.73289	53760.06255	22503.30709	107098.5873	44165.47482	41916.58491	57503.40315	92583.41953	129656.5746	137138.5927	83808.93797	11951.65044	48940.39527	38136.8043	95788.60786	118619.6255	20400.93189	25527.16573	24147.38543	76554.19505	43284.70169
PA(18:0/20:4)	258681.9966	728155.4345	412743.3613	740071.6524	861050.5763	525774.7513	281409.5273	757005.1542	409704.5722	522879.432	267814.7936	694951.4012	253126.6524	666847.9484	673128.0812	397093.0118	607696.3952	915418.7654	1458900.082	1194936.803	593667.3306	440073.9407	636092.4809	479528.6838	1007453.411	810759.5842	275281.7425	373353.3595	433539.6432	657045.1882	576233.2562
PA(18:0/20:5)	8810.905135	21875.21288	6708.499908	10379.67631	26451.42339	18227.07266	9345.254958	6251.146579	6489.582122	8213.472118	5146.18366	6749.486705	3829.670953	8702.507012	4539.766337	18386.62278	11941.82896	11889.21341	21689.87603	36439.93576	23431.5943	0	5732.172873	12409.47503	5046.493874	22721.22959	2053.613423	1013.548519	2570.067858	15952.89241	14463.22573
PA(18:0/22:4)	55572.83364	171359.749	117102.9843	220913.8991	98852.13398	58628.19073	72803.21685	221693.2129	128395.9692	117412.1263	66486.42917	176753.6131	37231.29916	91150.21	169151.4541	71555.89952	238234.0372	290348.5859	304803.9589	271333.957	117742.5869	238934.5818	148432.6331	91577.78382	292666.0231	124036.2412	56245.7516	136111.7432	174579.3912	92554.56486	52408.14984
PA(18:0/22:5)	51815.10998	122144.7532	73739.42623	100810.6008	142277.579	74492.01202	66560.64509	159155.0633	67774.79986	73970.80078	46022.05858	77896.79758	41934.39599	73416.21672	99100.92558	64320.24362	75462.48091	181389.2585	179403.8105	186766.5766	108707.3407	53226.55595	102073.8395	61768.39571	185923.2596	150391.9135	32932.68267	50607.27126	68367.21634	82894.29071	71900.1168
PA(18:0/22:6)	20791.81806	68907.0487	41701.84865	60850.14697	81758.55212	38199.35087	51428.85842	47572.95179	27182.35328	50855.60991	45880.0457	66729.09237	19823.43624	51427.06015	25595.11853	59396.47317	57545.57462	68294.81118	100396.3853	69133.45387	77174.33153	28602.06878	68971.93987	54371.78325	36321.84745	80468.2124	33200.30987	16641.95668	24503.98262	74589.41955	46658.43426
PA(18:1/16:1)	0	0	0	1030.132308	0	0	0	0	0	0	0	1010.237097	0	0	0	0	0	0	1099.086776	1115.269809	0	1048.218856	0	0	0	1128.755076	0	0	0	0	0
PA(18:1/18:1)	1544.544996	2028.142243	0	3585.988215	0	1020.152768	1523.936769	1462.867596	1873.625512	0	0	2336.665144	0	1496.961333	0	1528.055685	1006.295803	1745.100746	4887.495111	0	1690.851946	0	3905.611421	1515.268062	0	0	0	0	0	1544.970559	2557.439213
PA(18:1/18:2)	1068.689215	3533.255087	0	3081.746661	3083.372049	2534.462595	0	3157.293468	2591.918606	1495.481379	0	1009.705326	3024.42932	0	1045.620441	1493.454783	0	3518.107303	7077.999276	7089.327762	2540.363605	0	912.6355088	3530.317116	2921.601687	1567.410385	994.9747562	1042.038617	0	5581.839198	2532.519058
PA(18:1/18:3)	0	0	0	0	0	0	439.9590259	0	0	403.4327465	0	0	0	0	0	0	0	1005.919391	0	1519.620957	0	0	0	0	0	0	0	0	0	0	0
PA(18:1/20:1)	0	1520.069195	0	0	0	0	0	0	0	0	0	0	0	0	0	0	0	0	0	0	0	0	0	0	0	0	1045.26102	0	0	0	0
PA(18:1/20:2)	1049.248174	0	0	0	0	1049.993722	0	0	0	0	0	0	0	0	0	0	0	1042.790782	0	0	0	1036.294848	0	0	1049.428993	0	0	0	0	0	0
PA(18:1/20:3)	1552.402507	0	0	0	1028.673871	0	0	1084.269158	2080.652636	1008.076679	0	0	0	0	0	0	0	0	3419.760472	1540.31267	2069.5681	0	0	0	0	0	0	0	0	3126.785888	0
PA(18:1/20:4)	0	3119.204029	0	2074.436954	17645.44428	2077.915336	3110.524413	6253.395409	2080.294745	3612.861034	0	4679.071505	2596.198949	1699.874806	4083.406282	6136.359653	2581.624379	6346.427048	11917.89637	8376.808669	6256.921768	0	0	4647.92998	3106.375916	5744.306443	3148.743188	1544.393231	0	2503.777698	6725.423644
PA(18:1/20:5)	0	0	0	0	1047.535949	0	0	1064.61877	0	0	0	0	0	0	1083.592367	0	0	0	1559.272312	0	0	0	1010.337513	0	0	0	0	1045.259273	0	1608.473339	0
PA(18:1/22:4)	0	0	951.8995695	1559.340174	1450.377707	948.7189997	0	1043.260842	1083.417161	1549.196616	0	0	0	0	1561.09247	1544.39172	0	0	0	0	1559.047807	0	0	1557.604747	1023.980603	0	0	0	0	0	0
PA(18:1/22:5)	1038.314246	1037.76959	0	1516.358967	934.4216314	0	1037.46904	0	1042.017343	0	0	0	0	0	506.0166832	0	0	0	1013.982162	1556.702857	2598.647901	0	0	0	2587.904485	0	1037.946427	0	0	0	0
PA(18:1/22:6)	0	1042.970986	0	0	0	1564.020956	2592.894865	1048.062664	1565.508981	0	0	1042.952645	0	0	0	0	0	0	1547.615204	0	0	0	1043.404545	0	0	1023.965746	0	0	0	1044.662198	2587.695375
PA(18:2/16:1)	612.2765394	0	454.4788383	361.1697605	0	0	0	0	1065.630132	0	0	0	0	0	0	0	784.0716369	0	0	0	0	0	0	0	0	0	726.9087781	0	0	0	0
PA(18:2/18:2)	1048.806577	1513.516058	1014.048396	2049.456138	0	0	0	1001.823756	0	0	0	942.4041721	0	0	0	0	0	0	0	0	1513.305803	0	0	0	3088.793118	1136.889008	0	0	0	0	0
PA(18:2/18:3)	0	0	0	0	0	1053.913409	0	0	0	0	0	0	0	0	0	0	1558.858931	0	0	0	1046.966442	0	0	0	0	0	0	0	0	0	0
PA(18:2/20:1)	0	1252.788414	0	956.3939749	0	0	0	0	0	0	0	0	0	0	0	0	1003.397111	0	0	0	0	0	0	1236.221686	0	2615.838796	0	0	0	0	0
PA(18:2/20:2)	0	0	0	0	1500.832476	0	0	1584.715272	0	0	0	0	0	0	0	1002.465075	0	0	0	0	0	0	0	0	0	1624.722234	0	0	0	1195.32843	0
PA(18:2/20:3)	0	1019.019139	0	0	0	0	0	0	0	0	0	0	0	0	0	0	0	0	0	0	0	0	0	0	0	1549.822921	0	0	0	0	0
PA(18:2/20:4)	0	2078.619014	0	0	0	0	0	1044.625298	515.7863855	0	0	0	0	1519.614819	1041.76768	1044.731341	2591.172679	940.4159094	1558.628084	1021.091598	0	1036.294848	0	0	1034.839798	1041.445066	0	1006.02725	0	3096.450517	1030.092322
PA(18:2/20:5)	0	0	1053.340134	935.7051355	1048.470766	0	0	1392.705738	0	1033.538042	0	0	0	0	0	1009.692312	0	0	0	0	0	0	0	0	0	0	0	0	0	0	1049.531475
PA(18:2/22:4)	0	0	0	1030.284053	0	0	0	0	0	0	0	0	0	0	0	0	0	0	0	0	0	0	0	0	0	1565.375655	0	1512.041728	0	0	0
PA(18:2/22:5)	0	0	0	0	0	1002.229845	1525.395008	1004.357859	0	0	0	0	0	0	0	0	0	0	0	0	1015.558068	0	0	1083.440082	0	1565.262366	0	1027.488604	0	0	0
PA(18:2/22:6)	0	0	0	0	979.2803987	0	0	0	0	0	0	0	0	1542.173586	1108.515255	0	0	1027.529035	0	1043.683456	0	0	0	0	0	0	0	0	0	0	0
PA(20:0/16:1)	2026.710592	11162.89343	4371.33802	7146.083757	7356.340748	3595.671987	2579.087184	3605.974333	2613.337737	2947.230922	0	8706.302037	3416.054103	4699.50194	2614.37265	6447.904888	8768.430287	8793.799603	16007.98196	9794.448962	7332.471956	12708.29393	8105.571402	0	12361.57497	11069.90958	2006.039308	6987.38713	5330.262184	4420.102683	6066.497247
PA(20:0/18:1)	44950.79824	86827.85115	60428.52156	123510.4102	124951.3334	74171.71396	47241.56693	154083.657	68652.58125	57419.17588	29049.05946	98062.44971	56662.76919	115805.4307	31557.6808	58181.27806	113790.1729	152704.9165	163135.4226	173580.2444	109488.0521	56731.68018	134150.0226	42077.26178	146138.2647	123293.1095	21538.14558	39397.91625	47581.26776	158891.454	78957.425
PA(20:0/18:2)	199772.3921	211507.3751	237289.9861	310862.0279	411182.5725	226732.6975	200905.9384	721650.4259	191878.5523	195483.6496	103594.7233	339879.4958	268169.7669	563752.2464	163002.1833	261502.1409	426070.0824	514191.6063	848956.5026	603978.9805	467645.8468	63368.38252	546607.375	107043.5431	627892.0258	429616.1597	107683.4664	57270.29325	145393.6799	674780.9583	460501.22
PA(20:0/18:3)	4638.600514	3963.556767	4047.982197	4443.145807	6848.099821	2515.720277	1556.656088	10432.65592	6262.756634	4025.931324	1000.426876	2437.725315	1891.816572	10578.30879	2167.935768	2505.631443	7161.314253	8152.573192	6752.802892	4100.560067	6486.74437	1223.014899	8640.302802	2430.622577	7989.010384	7834.734931	3069.026571	4251.536887	3055.675344	6711.721429	4582.653704
PA(20:0/20:1)	0	4684.596291	2451.243127	5161.79655	2073.20324	0	1018.254156	2238.778766	1562.345878	1535.847671	1816.717091	2019.00637	0	3038.561788	2576.772218	3051.616297	1926.453324	3089.624927	2899.308235	0	2081.566452	0	0	1030.845495	1524.528038	1443.335803	972.239543	2007.61939	1291.446778	4686.899986	3234.119157
PA(20:0/20:2)	1556.674116	4512.266983	2960.822094	1906.262858	4678.267684	0	5195.568525	7835.892781	3071.483693	2041.020738	2450.906042	3166.577963	1546.526853	4383.591732	0	7698.010471	2471.269819	2327.514001	9402.041724	3873.667886	6222.860494	1552.336826	1539.927218	0	1770.597408	5921.171165	0	3540.854712	1781.309222	3636.571491	1287.754311
PA(20:0/20:3)	32204.44148	97474.38479	52632.19843	109671.9134	164778.3919	52523.29714	49096.26879	116599.2103	62712.11904	68369.12735	53178.07943	107003.5815	38506.55177	226911.2641	62285.316	58300.80018	101387.687	109086.6078	192272.6931	167928.6612	107994.1833	31298.43788	100885.6279	44224.70052	148646.4338	130746.9255	19871.31631	30168.85147	33919.20072	111515.4008	85971.75205
PA(20:0/20:4)	335454.2944	968629.0291	611969.9398	1294975.187	1952276.537	516575.9674	368522.9506	1210212.331	671864.6536	860916.2449	503348.1402	1279822.254	425233.2038	1207805.873	731829.0916	672129.7707	1411485.867	1382224.252	2145784.915	1719554.155	1002312.877	709928.3693	1228081.277	508908.0205	1646555.406	1219906.481	429693.459	543561.4335	712318.1619	1041806.037	784416.4027
PA(20:0/20:5)	12727.88271	33683.92617	6664.628524	18527.69759	88325.4943	25240.03189	25529.67527	34394.49985	20230.41183	11443.21038	6464.837738	14254.7524	9361.760702	28351.4759	9605.160544	49294.93455	52763.71929	31145.21945	57327.49541	43951.61094	55227.94538	6963.985802	23953.59128	16674.05326	24409.3306	38535.5445	6759.273989	5715.542171	2607.824236	45895.44419	30561.70713
PA(20:0/22:4)	28991.91325	120620.1793	92466.42152	259324.0185	61574.05407	48835.19343	44737.10206	144425.6419	135082.0505	90494.17698	66039.90929	154494.8962	37431.20991	88245.36198	151059.5384	44897.82446	278413.6605	274579.3345	262784.4105	158932.9684	80380.04478	183378.8996	212554.6804	63252.5441	310878.9473	84400.11753	56645.6783	158221.1062	170743.7129	60893.90887	32256.91637
PA(20:0/22:5)	23946.3423	107296.6798	51508.4462	124485.3671	122072.0831	36651.91778	29816.2695	106762.4815	70840.08374	50472.05867	41616.24542	88242.51017	33231.70012	108719.6556	61523.9716	64723.22914	85419.81254	148352.4711	177342.2859	96686.41218	77594.19431	41364.68446	133683.0684	45671.40319	129794.377	84815.85503	44598.82603	67392.81288	91900.27767	83154.1547	36720.01178
PA(20:0/22:6)	15645.37055	63251.92934	33383.72815	90514.01721	122701.6243	33566.66375	33320.6344	60393.48686	47675.94686	46253.16043	42281.74266	60572.96936	33610.26215	84426.80421	31630.17315	82484.52874	89964.49	63752.71849	151714.0839	85079.30866	98423.72338	28198.71299	116132.9459	59283.70989	66425.34933	62838.81185	31709.75676	23851.29205	39712.99343	103013.9244	64164.11005
PG(14:0/14:0)	0	0	0	0	0	0	0	545.43157	661.8586195	0	0	0	0	274.5207554	0	404.0833309	338.1289222	0	0	669.3114882	0	0	349.8747975	0	0	305.3592742	0	0	0	0	0
PG(14:0/18:1)	754.3945435	415.6575989	1224.616762	1610.098224	1777.192163	0	800.9093304	648.1669763	1041.777552	678.2993318	0	976.4183605	0	1228.469885	2181.423403	1315.476663	798.458208	971.5406859	1245.227637	604.8763719	517.137195	526.3963664	1114.873367	561.8276932	2116.163691	1272.279126	1374.413062	527.447366	415.568293	1092.203546	2268.736
PG(14:0/18:2)	0	405.5635847	956.5151297	2314.9266	1697.01712	544.8307893	0	1545.015597	0	1677.295775	0	1058.78884	960.4369386	2085.534317	1682.07948	846.0924936	776.4053329	1643.505332	2219.681242	668.3921398	696.8845715	0	537.4307287	273.9240249	2583.261939	1241.383361	375.3133361	744.7988152	1037.26524	2098.615715	1664.155782
PG(14:0/18:3)	0	0	0	360.4686604	599.9975984	404.5689755	0	674.5391111	584.3339915	305.8800951	0	0	0	949.9309936	0	420.9972546	0	0	0	0	0	0	0	0	765.3915827	0	0	411.723462	0	401.9523525	0
PG(14:0/20:1)	0	0	0	0	0	0	0	0	677.8440411	0	0	0	0	286.9081994	0	273.9593598	0	0	0	0	0	0	616.5807833	0	0	0	0	0	0	0	0
PG(14:0/20:2)	519.2479632	0	0	369.1358286	0	0	0	0	0	525.9473572	385.3386726	0	0	679.8114765	397.4084865	310.9594725	0	255.3238466	0	415.8089412	0	0	0	409.4149999	0	625.9542782	0	0	272.6048509	276.5212749	0
PG(14:0/20:3)	0	396.8002734	283.8362339	501.5120258	0	0	639.6716515	535.3783941	0	368.3381591	0	276.8227011	0	363.5212285	769.4896223	381.1643311	0	829.0153602	424.2239873	560.9155435	415.9408667	0	424.2045046	568.0115987	0	0	0	0	0	0	382.0121729
PG(14:0/20:4)	629.2398955	1262.252608	418.7307183	1514.989581	2643.983326	1259.128269	1011.90302	0	0	0	415.2812188	789.43316	826.8843807	2372.440237	1184.892548	2500.542342	1546.894496	3114.973619	2124.091329	1878.838933	0	1013.766725	1671.429282	1246.224258	2486.739505	1896.843029	1694.85729	1001.900271	621.1180227	692.2747123	2117.908857
PG(14:0/20:5)	0	0	0	0	401.3473815	0	0	0	0	0	0	0	0	0	514.4861217	0	0	0	0	0	380.614335	0	669.3674922	0	0	0	0	278.0187762	282.6658393	269.825	0
PG(14:0/22:4)	748.0182055	0	0	377.8885592	498.378581	0	0	1353.877232	913.7488097	0	1216.835966	1261.654493	0	404.0360125	0	281.8134256	623.4500055	504.0264956	869.5038289	1146.87761	0	1248.013625	748.6705856	0	872.8711934	1699.312682	558.510924	412.3127523	979.0345978	0	0
PG(14:0/22:5)	0	733.5263278	499.0172839	586.855589	832.3566919	0	0	0	0	421.8520463	547.0820889	1124.679594	1251.023085	535.1985519	0	675.5791185	418.5606785	1304.96893	893.2530897	655.8436566	0	0	0	0	831.3286174	0	422.1000527	0	0	0	955.6544604
PG(14:0/22:6)	0	552.5140082	692.1872368	401.1508785	1073.939276	0	0	902.3646518	697.7967288	562.5878142	426.1270973	557.7793093	282.6538831	918.913013	930.5681887	1659.648663	669.2205009	552.6100344	977.1909169	391.0046279	415.2982932	0	0	424.1340661	672.0063793	1045.034324	262.6123128	287.1815312	0	557.398804	530.6687522
PG(16:0/14:0)	0	946.9380368	5762.089193	593.2900319	2955.59248	0	0	0	0	0	0	415.8471387	273.213952	0	894.0508137	768.1396107	0	963.6005207	2191.528844	2394.736207	1093.05996	1154.210954	689.6681073	271.6707229	2817.164987	3840.403332	503.7010391	0	390.6510008	684.9139281	2506.123667
PG(16:0/16:0)	4098.945583	17131.98217	25388.99031	8906.335642	11356.87531	3645.549755	3876.262727	7341.67901	3111.375966	10430.61924	8042.225437	11350.17867	1246.389464	4660.044284	6969.387168	9984.558411	9893.104419	5630.259544	11862.91902	4723.492149	3284.053686	4998.717309	5993.541485	10878.42233	19220.54107	14579.41438	3902.346681	5099.423302	4736.735328	5298.125135	13130.27079
PG(16:0/16:1)	798.177599	3784.211293	32584.53291	1284.125345	4510.977947	555.0295078	2896.537104	2236.386353	1561.709506	2311.670354	5169.46678	2261.20629	2346.0142	1087.649504	4593.717075	4604.285645	5035.668242	1942.217253	4733.737023	5396.60991	3928.093041	5955.338195	1923.862488	4044.100058	9074.099545	13151.26136	811.7917143	1087.900425	679.56302	2372.915255	12461.51484
PG(16:0/18:0)	1873.461329	4349.525438	6070.422774	4404.295911	5071.514471	1611.851076	2963.471076	5412.812581	4338.057851	4624.812643	3768.555934	10911.72285	998.4830762	4581.431562	7744.609475	7112.005331	8385.020325	6300.948155	9810.970629	4237.882609	3649.056208	5931.645245	7206.332352	3088.783209	10335.59788	8537.484567	3611.272969	2508.498252	2779.058543	5002.981896	10805.53498
PG(16:0/18:1)	24459.97864	117304.1178	250638.7441	105211.0319	151887.1921	23614.60777	97970.59262	76349.95425	82415.23834	167446.7447	96152.40327	247292.4774	53422.59895	99031.28753	130746.7845	133769.74	195931.575	89049.26403	115149.4057	68225.98353	85183.39845	124734.6433	211005.2092	124620.6074	155480.5903	230774.331	117567.3536	45573.29121	72269.49126	85646.21903	216164.2854
PG(16:0/18:2)	10351.63213	32065.54231	102528.7359	25020.35714	38097.91118	11888.96332	25248.87697	35433.05139	26665.82752	59867.97385	25276.44758	47262.3183	17162.7946	37442.27437	34123.35257	37722.39641	40926.94827	24853.04557	32776.00843	27323.92755	28962.11092	23494.48759	51463.5517	45382.36021	68916.61794	65418.30997	31777.83679	14895.20238	14503.6304	26020.65937	87126.50968
PG(16:0/18:3)	0	1666.427107	4351.007425	0	658.4521435	0	0	1059.826453	358.8114071	978.5938603	263.6283335	680.2913143	694.2095008	282.9293162	938.5181742	0	664.8540861	696.3366193	1588.250634	1828.884054	692.2715931	0	1665.347194	828.7049222	1395.650169	1887.574364	697.322702	421.5186378	424.5775948	402.7881505	3332.174197
PG(16:0/20:1)	0	1808.616672	2369.389982	1367.658015	798.1080862	419.9432869	803.8910526	1175.681557	0	2013.732276	0	1679.146468	1059.085008	1175.787148	1435.617608	1287.501195	1071.687883	1808.992199	2147.147217	264.893926	975.4099359	932.8167948	2371.218602	697.6648057	2137.54407	2219.762246	1406.707947	0	464.1541174	699.2872329	1870.395247
PG(16:0/20:2)	2539.008285	13426.33435	21589.03584	16255.85441	20539.33481	282.335829	4973.91731	17026.75669	8510.779923	14977.74886	11140.43318	17227.54047	4932.080661	22278.7612	27733.46883	12446.8883	14633.24547	10384.93959	21009.48671	9121.29017	10594.19678	7356.05325	23238.94836	8792.604646	27544.44529	22211.66942	18504.50574	4678.278374	5831.133265	5756.739516	30013.43227
PG(16:0/20:3)	1066.495309	5735.23579	6916.71183	1444.07794	4960.569241	558.52207	2396.875328	3867.984205	1860.694874	2530.396671	3475.647745	2027.5858	1937.304006	4293.505247	3581.935617	4549.972096	2107.480985	2713.837734	5932.91737	1126.003592	1951.032416	2374.260871	4922.417297	2088.219658	4243.459635	7729.387015	4158.270783	1660.667402	1243.576729	2438.911925	11293.47201
PG(16:0/20:4)	4652.769218	4771.764612	17900.70895	6243.943131	9944.978439	9078.927302	3723.262572	14204.59788	11970.69336	7944.636127	1601.459576	14712.26676	1771.520796	12124.3308	20587.36249	11917.09763	8705.53687	15339.12929	9100.779998	6673.202732	6443.767522	5421.744478	9441.616011	7319.997618	27777.28376	14894.51501	12799.11687	2992.34952	7139.212054	10399.71042	18460.79068
PG(16:0/20:5)	0	0	677.1930752	0	529.4874169	0	0	0	0	278.965541	281.6857769	686.5870185	0	0	0	1367.844042	400.1288342	548.1666768	646.2893362	1095.366522	0	0	411.1213596	1221.621403	0	791.0293295	0	0	0	681.08203	658.9640179
PG(16:0/22:4)	0	278.0788999	0	1201.583433	534.9071186	0	400.4633663	507.2743613	1201.188733	413.6272442	0	411.0340252	0	281.3769461	796.4967551	561.9875175	687.2808388	1516.30552	1093.232983	692.6739926	0	400.6284159	666.4679664	275.5880372	1045.08273	1046.965638	414.539201	398.4568904	393.2704525	414.4078112	935.8558293
PG(16:0/22:5)	0	831.1248438	831.6286699	667.750774	401.9618801	277.9500494	402.101362	730.4412527	1076.295488	363.1767731	0	556.2833672	0	889.2349374	0	0	931.1642704	550.2548931	644.7618227	412.6807062	274.7157764	0	692.7848026	1103.756481	1008.111674	1049.096506	0	0	619.9544158	0	937.9999996
PG(16:0/22:6)	0	275.0038722	412.2128105	691.9430011	566.6865362	259.4608172	605.21745	3171.656869	624.2548831	642.3542247	506.7011326	1241.86395	0	646.9925555	801.762075	1021.742132	605.4775676	412.7552084	963.6427012	281.2478073	277.8672444	0	277.2107146	0	1088.614003	2090.633252	760.9045961	0	266.8776195	0	1025.290351
PG(18:0/14:0)	0	563.2739052	1817.56328	488.5987339	484.006972	423.1474574	600.8702994	669.8244754	0	382.2026526	397.1111213	0	272.7561549	403.6285263	0	926.6987175	363.0639515	419.6335146	697.080928	275.0050464	280.354173	0	529.4677106	505.9468857	970.2909534	654.9542334	0	0	369.9113789	1395.330447	968.6886949
PG(18:0/16:1)	933.7444753	3497.017876	13809.34618	811.2535188	3674.670237	836.9270705	537.2761057	1047.814713	2220.811013	1376.998914	1371.833073	1674.535529	1261.776225	785.8421697	2215.608407	1104.516142	794.087287	1674.853151	3486.279754	2233.349421	980.5849696	3756.727035	2626.386204	1723.599118	3616.262263	6716.111986	684.2606984	0	410.1577944	564.6531115	4669.990256
PG(18:0/18:0)	662.5518919	4458.958874	7381.639434	3887.677087	3466.552619	819.124353	2408.936839	3401.736409	2976.915708	6570.42113	2134.28351	5150.652832	1807.59487	5042.061118	6585.822237	4802.561357	3110.711809	3529.648078	4000.49645	1082.455485	2843.525807	3089.434518	6389.180587	2225.69126	4213.160746	7696.61991	2347.865897	436.7020855	2070.654672	2577.540477	4053.049014
PG(18:0/18:1)	16216.05202	92172.90805	140522.3628	56310.56425	63987.46384	18572.04285	42067.14536	37864.97122	47667.57458	162391.671	67280.27363	102216.5908	26334.97394	93201.76665	117559.1574	114469.6757	101504.557	57902.67732	64223.15956	23663.6165	40803.82403	105032.8764	116915.1232	43903.4041	74206.03317	149302.4433	67798.95447	21840.08384	42208.41589	37343.8279	86222.62578
PG(18:0/18:2)	15057.94939	76198.22674	178583.4374	50022.39735	79973.70904	14650.76102	36517.58219	63328.73838	61435.34552	130665.1663	87614.84688	85051.86938	28976.14034	110084.9684	109732.51	64980.99204	73521.22965	52578.9173	58307.37887	24532.6307	37840.96902	59638.23463	101983.1062	52891.86986	105701.2879	157215.3117	59806.60823	22687.55686	38636.62257	32717.80039	128523.4371
PG(18:0/18:3)	604.0881028	1534.739756	5016.754768	851.5091503	1456.368069	699.847267	0	1332.085184	975.5503931	409.1607243	798.9561149	1119.476794	419.988027	0	1088.582352	1213.328306	729.393001	698.0266658	1113.330234	559.1489496	270.7276733	605.9127184	1675.019954	415.8263782	0	2667.040416	530.7248961	0	273.5253498	415.3157526	1919.60539
PG(18:0/20:0)	454.0528486	616.0124652	695.1688761	925.0411192	920.3084104	464.9197065	0	2535.257639	1153.999468	906.5745964	708.7081862	1036.519723	483.3604172	1278.255765	1124.036504	1960.932312	451.4828847	1245.090423	1671.325164	463.4792854	713.9384403	698.7097934	777.7865509	932.9067645	1062.193019	1357.27722	625.59377	294.3250712	947.916013	1316.737229	1118.702538
PG(18:0/20:1)	937.2147509	1518.243397	2633.946281	937.8721774	937.1056242	971.3393857	925.9756467	1146.467628	0	2010.468552	932.4089108	563.7093327	693.6411474	1628.259173	2007.185727	553.0706761	1873.875181	0	946.7385399	553.811059	0	0	965.0045995	0	1606.16698	1648.983432	673.3898013	539.8398358	0	438.5347874	3530.557559
PG(18:0/20:2)	4022.670112	13560.26714	13087.31437	6440.122177	9553.604385	1805.007909	5021.670771	6129.083288	6055.102009	26082.88217	9223.114278	7087.873784	2450.630581	13400.78818	21951.70771	9194.181733	8900.367105	6560.253009	7760.25259	2496.027229	4719.223781	6266.693467	14937.55127	4295.97992	12474.33889	20087.62642	9150.808369	2564.766184	2440.338597	3287.50891	10496.38337
PG(18:0/20:3)	1339.097468	4592.938053	3358.173461	1942.231221	5405.763615	422.4463499	2142.10705	2743.535934	2236.446203	4830.408037	2966.214942	1558.340287	810.9269994	2747.830932	5948.44172	3167.180261	1708.815963	1901.377421	3506.419628	1382.28615	2621.327118	2279.634361	4152.16207	1724.221297	2848.962354	13205.43603	2172.530064	688.176947	736.3115231	1360.14436	6614.960143
PG(18:0/20:4)	2842.272544	11429.85743	17487.56518	8644.004336	7753.117497	5822.506765	3729.861281	9986.414644	9030.894611	10523.8399	5022.070861	17516.55899	1864.849444	10592.66044	17597.09925	7624.42778	10770.55193	10170.75273	20811.67798	7378.832074	6701.281332	11309.71728	12198.4525	6242.089252	23844.88483	9837.690652	10372.91971	5172.369431	9733.40452	5591.170586	8661.350174
PG(18:0/20:5)	0	0	0	381.5899884	0	664.6675573	0	0	0	399.2384461	258.246175	0	0	271.2509684	0	693.922098	0	0	0	0	0	0	0	0	768.624	0	411.2094597	0	264.8207686	0	384.3119999
PG(18:0/22:4)	0	0	0	0	0	0	0	0	389.590271	528.2806341	651.9763503	0	0	0	776.0467422	0	0	647.5142028	909.6133959	707.3145957	0	0	645.1524196	0	385.3472127	1159.178569	0	389.274986	0	0	0
PG(18:0/22:5)	0	0	659.1145258	0	523.0412837	0	0	737.0189811	1308.70488	0	262.8056407	776.6159344	290.2239874	0	683.1360581	791.381692	393.9293079	678.0522814	0	0	0	0	401.3022822	0	0	1148.09274	287.3257653	265.5416376	0	0	0
PG(18:0/22:6)	0	0	0	0	0	0	0	673.3045275	0	0	0	0	0	594.1448533	1479.883452	535.1662717	0	0	514.0852431	0	0	0	0	0	0	1484.265187	0	0	0	0	769.1778383
PG(18:1/16:1)	1198.417546	3806.790203	7427.478227	4283.530316	3409.02188	1549.987889	1682.16052	1601.253117	5945.811445	2680.868968	2941.95166	5847.45279	1114.559616	3086.269368	2165.600838	4055.17191	5028.992172	6480.961451	5522.750597	4041.16099	2818.463512	2957.200147	6969.084346	2622.564159	4667.750821	6221.660145	2943.161592	1808.979885	5083.935577	4869.6584	3942.376756
PG(18:1/18:1)	2926.984992	7473.637338	19399.14875	14003.23391	8777.217303	3811.946058	10506.15994	13534.61851	19418.49447	21746.00886	9713.418693	36596.07678	5582.605873	13989.20442	11945.96863	20092.34471	23087.52329	12925.27788	19038.47797	6323.786642	8730.274694	15928.52091	17168.79412	10323.229	15226.94652	26152.34081	10576.30275	9177.56323	7721.97303	17036.81029	74043.58489
PG(18:1/18:2)	6860.457709	28193.1059	95350.7475	38309.04083	26977.31099	10377.72856	185334.9339	66870.28685	40834.64344	92096.30997	51233.20047	141003.2977	19432.37018	82097.01427	45941.1785	97096.18625	32710.05277	39345.69568	38061.05257	27618.13492	51706.51024	20519.50929	182580.3377	30215.53335	25299.56357	155335.9318	206149.8895	37836.4822	71221.99426	63492.4032	31887.45951
PG(18:1/18:3)	0	0	418.1606553	0	1336.379457	396.0367346	0	500.0845495	484.4520381	1743.537723	0	4004.242678	0	1881.689047	0	4352.546208	0	555.0395611	1254.414075	700.7721907	0	0	1254.312322	0	803.4663458	1465.036889	0	0	486.3966131	978.2499638	924.4196474
PG(18:1/20:1)	0	0	0	0	631.0190931	0	0	0	656.3265767	0	0	1068.006623	0	356.1273945	1061.182568	536.1764351	0	395.1801169	0	0	0	0	665.184463	0	0	0	0	0	0	0	651.776
PG(18:1/20:2)	0	974.465759	423.3956238	496.9003593	535.9139026	283.634742	402.1582023	379.6881593	0	277.8569189	268.7295608	1535.5513	0	1220.205253	0	402.6259167	808.9831864	694.7747332	975.4047258	281.3437714	272.3321141	0	1531.657962	0	670.6223637	647.0367772	544.2730163	0	669.6916778	419.1918602	0
PG(18:1/20:3)	0	820.4558544	1081.181379	1330.144189	398.7889631	0	0	934.9580174	519.0094794	1160.686169	508.0322321	1221.133642	0	2546.000494	405.0705214	1304.851353	797.7914522	810.6603732	2100.283663	684.5070387	0	0	274.0844229	1356.297575	926.1197462	1512.41371	0	638.1389398	386.2933427	1642.055383	0
PG(18:1/20:4)	1887.226969	2620.928788	4453.846617	4460.546081	2597.50869	2264.9926	2346.768841	3645.028069	4889.927699	4412.489475	625.5789456	10267.22854	979.0350798	3220.689711	5051.687183	5290.785583	6134.210672	6898.096655	10238.0534	3396.525156	1649.856122	5492.10772	3674.456733	3303.746263	7579.288836	4819.04319	2879.058368	1788.397603	5167.599707	4099.744291	4365.948709
PG(18:1/20:5)	0	413.3697704	0	0	0	414.1409695	395.0224963	0	541.984107	0	0	0	0	380.8748336	531.7991165	253.0533311	525.3107123	410.5956661	413.4145157	675.676656	0	0	413.3924823	275.5925439	0	0	0	0	0	0	769.814935
PG(18:1/22:4)	0	415.9958042	556.0888069	0	0	0	0	532.3983314	677.2609292	0	0	553.0134463	0	257.4803105	540.1711952	538.5115387	390.6087173	782.7309871	828.4310949	413.7663003	0	400.2386821	547.9186031	0	996.7048275	811.2171736	0	519.9902529	1191.79448	0	0
PG(18:1/22:5)	0	0	0	0	0	0	0	0	541.4183647	251.9229716	381.7577986	661.8463448	0	752.9042251	0	445.1609712	740.820097	328.156787	559.4537948	442.645994	0	0	0	0	857.8720545	0	318.0417178	0	379.1848905	0	1930.883229
PG(18:1/22:6)	0	0	451.9612058	0	834.2383077	0	0	544.4120711	0	245.9213347	514.4196368	601.2766182	0	527.3250964	0	732.0515383	332.4876807	711.2031197	1508.062798	0	394.6533271	0	0	831.8239196	0	0	0	0	0	595.0019272	701.7130522
PG(18:2/16:1)	4379.344534	5520.159863	3181.345268	5134.173699	4081.22786	2108.639893	3495.050024	31279.24672	6533.591665	5554.344129	4339.522696	5973.101747	3193.304995	2218.122764	4937.52287	8044.140435	9144.572665	12338.0972	13485.25739	7493.213593	5295.685873	1779.791893	10184.12139	7708.952135	14760.25852	10569.0759	3739.501263	3350.46995	5415.540713	11819.21711	8378.28268
PG(18:2/18:2)	2916.517424	7740.140432	9681.397033	11731.60461	3746.623665	2425.627149	3920.178303	10641.91396	18384.04364	7975.153683	5205.284678	11996.47421	2507.590244	8412.196562	10884.87155	6451.364656	10418.17288	21629.50593	18275.65542	7948.864553	6151.069726	8541.731823	13242.46603	8103.317728	16276.21926	5722.557752	7187.372883	5008.436709	10401.05383	6842.901464	32045.13048
PG(18:2/18:3)	0	1367.483019	1656.28737	0	1348.509191	1036.949497	1703.824504	1619.689784	875.0939282	1279.284173	856.3804072	1896.305353	965.3775721	0	828.2321043	0	1017.753603	1651.85897	1330.653171	1319.983532	1577.217309	0	1984.361653	0	1385.760554	2208.678896	4309.592662	0	589.2341379	573.9445232	3560.191931
PG(18:2/20:1)	0	0	0	338.0941671	0	270.9011506	0	0	0	418.6295692	0	0	272.6761631	0	0	0	0	409.2545531	0	0	0	0	0	0	0	0	525.3322544	0	0	0	904.7616249
PG(18:2/20:2)	0	320.511191	1173.537437	2179.253531	1487.831404	0	2990.724521	2548.727365	3381.649086	1553.518525	0	2617.242636	1479.227826	2386.777578	1035.99621	0	2325.320859	3970.104155	0	1996.066794	1538.50434	479.7105443	2746.934049	0	0	1813.226955	2906.939493	908.6279742	2896.637758	1383.926823	1348.449747
PG(18:2/20:3)	370.6140688	0	351.4111353	1175.64046	370.1913485	0	0	1283.043611	2290.527006	2624.021107	0	509.4242225	0	797.6170064	636.5154203	1128.511985	0	960.8601905	362.4466386	0	646.3929352	0	0	358.881746	0	491.871144	344.0752388	0	348.2868749	0	0
PG(18:2/20:4)	1225.540432	1347.445653	2006.945761	1940.487436	3136.167543	1014.548725	1077.134014	2444.334751	4504.414931	3893.878813	954.3448013	4232.640738	1838.022299	4492.87621	3823.927357	2412.748137	4390.064969	1206.975695	2506.147482	1877.503063	1904.791631	2027.830523	1676.132111	1671.586587	3660.732369	2441.800419	941.148643	1372.692732	2578.02973	1841.71159	4664.344567
PG(18:2/20:5)	586.8413043	0	0	0	468.2815215	0	0	0	482.6135084	0	379.424669	0	0	0	0	513.8633334	0	0	902.9774631	0	568.7759709	401.6889945	0	0	400.928	388.9183988	0	0	0	0	0
PG(18:2/22:4)	0	0	0	0	0	0	0	0	524.8440751	258.6938473	0	367.1460413	0	0	0	518.8195278	856.8546382	0	0	638.4261355	366.8011618	0	0	0	0	0	389.3639453	0	653.0224618	1106.088003	0
PG(18:2/22:5)	0	0	0	0	0	0	0	0	0	531.2773655	0	0	0	1152.309943	0	643.1189043	0	0	0	0	0	0	0	399.5378414	816.6792365	366.5290609	0	0	0	0	0
PG(18:2/22:6)	779.9942708	399.4006916	0	0	0	933.2741961	781.3513826	772.7920931	0	565.8716753	414.5713501	0	0	0	627.758509	405.2104582	781.2169775	0	0	0	0	0	406.3011859	0	0	0	448.6120714	277.5447897	0	0	807.0400937
PG(20:0/16:1)	0	0	0	0	0	0	727.2111936	839.5530161	0	0	0	0	0	0	0	266.0651289	0	0	0	0	0	0	0	0	0	388.196458	345.3602961	0	0	0	0
PG(20:0/18:1)	0	0	0	0	446.3842236	0	945.2537682	0	2244.422226	1391.295088	0	0	567.0737336	1103.085941	737.7901717	911.9986711	720.3535457	858.3429984	924.541286	0	0	0	1316.550182	0	505.85339	1354.980632	2286.997316	633.1837069	0	0	598.7867876
PG(20:0/18:2)	0	0	0	0	939.6836918	0	0	610.7815144	1184.569618	532.8355332	0	0	0	1438.397175	0	753.991825	0	1105.975371	789.9348594	0	0	0	0	0	0	877.9469961	406.2677892	0	403.3889892	0	0
PG(20:0/18:3)	0	0	0	0	0	0	0	848.1431101	0	405.1749341	0	0	0	0	1094.089906	0	0	0	0	0	0	0	0	0	0	0	564.8971775	547.2682102	428.9807777	0	0
PG(20:0/20:1)	0	0	0	0	0	0	0	0	0	0	0	0	0	0	0	0	0	0	0	0	0	0	0	0	0	0	0	0	0	253.8148595	0
PG(20:0/20:2)	0	0	0	0	0	0	0	0	0	0	0	0	0	0	0	257.1477599	0	0	0	0	0	0	0	0	0	0	0	0	0	0	0
PG(20:0/20:3)	0	0	0	0	458.3731864	0	0	0	0	0	0	0	0	0	0	406.3769976	0	0	0	0	0	0	0	0	0	597.4960757	0	0	414.7107683	0	0
PG(20:0/20:4)	538.2910759	840.9249527	0	0	0	0	0	1190.415054	0	873.1664273	492.6152275	909.1153457	0	1010.202384	1018.220573	1138.495742	645.5760832	0	1276.520387	0	0	0	944.3803199	0	1755.363194	1191.688876	381.6647506	472.4936419	735.2951194	406.3475748	786.6304956
PG(20:0/20:5)	0	0	0	0	0	0	324.6905185	0	0	0	0	0	0	0	0	0	0	0	0	0	0	0	0	0	0	689.9293222	0	0	0	0	0
PG(20:0/22:4)	0	0	0	383.0933055	388.340328	0	0	0	0	0	0	0	0	0	0	0	0	0	0	0	0	0	0	0	0	0	0	0	0	0	0
PG(20:0/22:5)	0	0	506.5926755	0	0	0	0	0	0	0	0	0	0	0	0	0	0	270.7374584	0	0	0	0	0	0	0	0	0	0	278.5307527	546.7834736	0
PG(20:0/22:6)	332.8264117	0	0	0	0	0	334.1055713	0	0	513.609604	0	0	0	0	340.6005292	0	0	0	0	0	0	0	0	0	0	0	0	0	0	0	0
PI(14:0/14:0)	825.6188643	0	0	0	0	0	0	0	465.2064228	0	0	0	0	0	0	0	0	0	0	273.5506024	0	0	0	0	548.3137787	589.6769041	0	0	0	0	0
PI(14:0/18:1)	1119.819676	8848.040364	3996.14079	6343.776442	715.1628086	2451.925341	4513.480151	2806.580311	6355.88771	5580.137312	4127.011264	5796.285348	839.2542862	4354.951205	2421.318077	3729.076969	2950.312751	7536.548163	3530.56821	13209.56645	2288.19535	2268.097472	3420.930639	884.1876984	8243.487727	2838.766145	3664.331964	1762.633321	1161.391105	6795.692793	2728.518485
PI(14:0/18:2)	3700.892901	24783.90377	4880.235064	13065.79161	7673.394767	2884.272715	7365.257774	18726.16905	11553.30375	8038.480224	3624.178464	12540.73717	2902.383623	10991.02497	9582.753139	10312.01137	7674.674495	12143.66943	13617.31374	21775.43649	11477.56072	1934.492611	9650.23204	3872.899054	16620.04661	12284.69703	6699.130893	2647.539915	5830.946942	10965.37975	14358.86885
PI(14:0/18:3)	0	0	379.6031562	0	0	0	0	0	895.0638113	0	0	0	0	197.0850427	1182.682416	0	0	0	340.2242939	0	0	0	0	0	511.9663898	0	0	0	0	0	1047.66527
PI(14:0/20:1)	0	0	0	0	0	0	0	892.3642576	671.2300245	586.0760392	318.6496538	0	0	0	592.5230989	822.7378625	0	0	0	0	0	524.4730281	0	0	0	592.6242383	0	0	0	0	810.2677217
PI(14:0/20:2)	0	0	874.55551	0	563.6917073	0	0	1629.64359	904.4004656	0	0	466.4588493	0	206.7233111	897.7044995	0	0	0	592.1972807	0	0	0	869.7931436	801.2540974	852.2334381	0	496.8271981	0	0	0	0
PI(14:0/20:3)	2501.108803	2626.230473	2981.86371	3879.22738	1969.358325	1901.93646	1400.901748	2689.817614	3037.540026	2048.500399	1058.677638	2738.367489	1054.194561	2899.528832	8619.989624	2325.785602	4475.242222	4096.398812	2587.526307	1590.753024	1085.417546	1079.371316	4733.014199	3054.059094	2107.258736	2520.206801	2156.036162	2394.205589	2566.090552	1926.140142	1138.183126
PI(14:0/20:4)	2015.564934	7299.870699	2001.511892	4679.665818	10071.01965	2963.324003	4118.741085	9439.223496	9286.228264	9690.289946	2756.652026	8429.104856	2843.380626	7820.934445	9239.026814	8768.442583	6583.959366	15138.43504	7422.49559	8701.291304	3510.336241	2589.347436	5359.807892	1421.80192	5874.539655	8482.371436	5488.275308	1160.975335	2605.896902	8465.676778	4712.140692
PI(14:0/20:5)	0	807.5624244	572.4618645	1460.830059	1555.877024	550.3926624	0	887.491573	1026.169199	4622.025958	583.4612168	1102.276487	0	0	453.0316353	571.5055684	1446.198601	1136.717689	0	2160.376348	0	0	0	849.1730683	1166.084111	1747.895861	0	0	0	0	587.3553488
PI(14:0/22:4)	0	0	556.2610129	1444.647029	885.0638133	0	0	1502.149021	2085.627646	2020.188642	0	1940.378882	0	839.161476	1202.122993	1451.336411	2636.810339	0	0	1353.15855	0	587.3322916	0	0	2043.862811	2982.655858	560.0162399	0	0	0	0
PI(14:0/22:5)	0	1076.769736	1382.842063	0	1455.887461	1729.52491	893.3851273	2398.991054	0	1445.4983	0	1365.677355	0	1138.696323	895.3517746	747.3235402	1380.153256	1402.91788	1412.291829	0	826.624274	0	1006.015763	0	2038.258987	2689.480026	1133.218475	553.3015543	869.5077664	0	1419.473528
PI(14:0/22:6)	0	518.9548338	0	823.6095773	0	0	0	0	0	0	0	1193.069266	843.1940689	0	0	749.4008412	824.7026629	0	0	0	0	0	480.919727	0	560.5376006	264.7141754	0	0	0	0	0
PI(16:0/14:0)	0	0	0	0	0	561.3485337	0	897.2951793	0	0	0	0	0	1330.28754	596.0332387	588.1757671	0	0	0	0	0	849.4541392	936.2791268	0	0	593.7345871	0	0	0	0	569.4600114
PI(16:0/16:0)	0	487.1563803	1283.503072	893.4543343	1128.947013	0	0	2140.822196	0	1072.954748	0	0	0	0	1081.169732	1477.53268	354.7151056	0	0	1036.276382	708.5234625	0	0	917.5691325	707.6141159	803.5980611	0	0	0	0	0
PI(16:0/16:1)	1523.176054	0	2094.464858	1483.627381	1314.270875	1377.380519	0	0	0	0	1019.604737	0	0	0	0	0	0	0	913.6361057	0	1559.047807	0	1132.434118	0	1823.075387	0	0	0	0	1614.769228	2073.32165
PI(16:0/18:0)	2355.132578	2305.106669	1909.090371	4224.373543	3447.222982	805.2497402	0	2552.764598	2645.306085	1162.627947	2015.933628	3930.345924	1020.743101	4106.023549	3051.945028	1377.052947	2970.974899	2565.170075	3499.9552	3064.876669	4662.464438	0	3649.433071	1032.469672	6831.044023	4865.380794	3121.806402	1565.989416	927.7088275	5680.311605	977.3651897
PI(16:0/18:1)	2247.532658	2786.964218	6163.965759	6783.869365	2772.275938	3040.066353	1900.446624	1054.107539	2793.862435	1942.146006	2455.237706	943.384032	0	0	2208.367454	3285.756689	3417.652754	3957.85207	5804.181838	2778.364936	3991.59863	2017.315695	5379.921837	3986.73319	6381.883556	1491.907126	974.0873921	1587.206208	2151.026961	13871.27972	1822.259291
PI(16:0/18:2)	2679.221261	4204.116	6136.716066	4648.040864	12398.75489	7975.322521	8355.427493	2935.310363	2074.077872	3980.137166	1980.141399	2738.729682	1682.649023	1574.343892	1011.752029	801.8850231	2460.56246	3883.538968	6344.440267	3865.615676	10695.50429	2325.981631	5617.955561	2514.772115	15595.84247	1949.312079	0	997.6989686	1176.693088	7462.980414	3375.719972
PI(16:0/18:3)	123144.4801	674193.3624	625523.7825	252443.0481	368368.9085	130375.5151	264013.5444	395023.1867	213371.076	310064.3169	246434.2067	201532.1268	114906.4178	280233.8848	271450.2972	382017.0069	313758.2247	622692.062	506594.7973	377264.4374	412518.0567	140754.2825	336702.0815	163616.93	428418.4958	631925.8104	278430.435	55568.55243	218939.0604	450520.2023	1059174.295
PI(16:0/20:1)	0	0	0	0	0	0	0	0	0	0	0	0	0	0	0	0	0	0	2082.126171	0	1033.767257	0	0	0	0	1056.173701	0	0	0	0	0
PI(16:0/20:2)	0	0	0	1573.37857	0	1557.716792	0	0	0	0	0	0	0	1576.878814	0	0	0	0	0	0	0	0	0	1042.597516	0	0	1045.26102	0	0	0	0
PI(16:0/20:3)	436.3115023	498.3719184	0	466.6694599	0	0	348.9224108	0	0	1430.154156	0	1545.560204	0	1000.552048	0	1501.784553	246.7063498	512.4130067	855.0156139	365.7037747	247.5780445	0	0	0	337.0264948	1587.181777	317.3268044	0	0	0	645.2370726
PI(16:0/20:4)	1643.055557	4383.663236	30987.68058	3522.119138	4980.12065	6420.756016	3119.657481	1675.189727	0	2992.875213	2973.030872	0	1652.224565	0	1385.823787	2586.332098	2164.485121	9762.947733	9384.442165	4558.032892	4232.236903	3169.792377	4879.73206	4490.894241	19954.93933	4848.357514	0	0	2271.169996	7512.947058	1235.420571
PI(16:0/20:5)	0	0	0	0	0	0	0	1533.069261	0	0	0	1053.501715	0	0	0	0	0	0	0	942.7893236	0	0	0	0	0	0	0	0	0	0	0
PI(16:0/22:4)	0	1025.982434	0	1757.202891	0	0	0	0	0	0	0	930.5948956	0	1567.136873	0	1034.110974	0	0	0	1198.217384	0	0	0	0	0	0	0	0	0	1016.947367	1559.580364
PI(16:0/22:5)	0	0	796.7795329	1573.427731	1461.39501	0	0	957.2014652	0	1049.056401	0	0	0	0	0	0	0	1553.78329	1235.20257	0	0	0	1042.969395	1554.208626	3473.982983	0	0	0	0	2107.824731	0
PI(16:0/22:6)	0	0	0	1573.538557	0	951.3367757	0	950.0581687	0	1006.107629	1050.241351	1981.555764	0	0	0	1568.510849	0	1564.942216	0	0	0	0	0	0	1047.900692	0	0	0	933.7645403	1407.424557	0
PI(18:0/14:0)	0	0	0	0	0	352.6395258	0	1042.852189	0	0	201.0038554	222.79839	442.2261465	286.6495981	0	0	340.0011339	0	0	0	0	0	215.7687502	0	217.4836297	483.2455507	0	0	323.176433	247.5734313	0
PI(18:0/16:1)	1046.360174	1027.371416	7229.666107	1527.682191	2907.283069	1560.567839	0	1573.231136	0	1406.152469	0	2085.108508	0	0	0	0	1571.050959	0	3834.596419	1765.607196	976.4766889	0	1576.260251	2798.319365	1023.338283	2142.146578	0	0	0	2180.290789	0
PI(18:0/18:0)	0	2324.719543	2983.730403	3553.275957	7510.547537	0	2603.389524	3624.663626	2086.671668	778.0730751	2028.558652	4483.76524	1043.650324	2728.616053	1946.703725	2486.312142	12571.72828	6270.124404	9716.382749	10081.9139	1453.072811	2066.712207	10725.55888	2541.737324	2800.583465	4068.984849	0	1505.535415	833.1645219	1731.886483	2504.712427
PI(18:0/18:1)	1929.938819	1368.975161	12049.72047	3440.507651	4378.701728	4344.648865	4607.962647	2083.725746	1526.595696	2181.49881	2039.187342	3048.293083	3323.075214	1933.106619	1528.280709	1227.953777	1744.706213	3179.398286	5720.857133	2902.599005	4625.27503	1330.257212	5850.974631	2463.249746	1981.835133	1032.828408	1172.711546	0	4541.917868	5047.774432	1234.780812
PI(18:0/18:2)	9361.901016	6168.732099	12708.50025	6251.955503	14853.57445	2514.895214	8505.108413	2223.201026	1597.672549	6723.048182	6115.352061	5000.798973	4335.003794	7423.909164	1662.847448	1792.757354	9448.356821	6767.019717	4762.66233	8292.568075	4310.638383	3350.822135	16963.77792	5727.494928	11211.9736	0	3932.039093	5536.179866	2562.514295	9334.512127	1807.840749
PI(18:0/18:3)	0	0	5465.174162	0	0	0	0	0	1492.51579	1006.094856	0	0	0	0	1501.129531	0	0	0	0	0	0	0	1569.085415	0	1498.58764	0	0	1543.565718	0	0	0
PI(18:0/20:0)	53499.00871	592995.4211	403064.6942	440545.8388	498492.7178	74936.40757	277635.6401	309742.7697	183190.7474	453015.6392	370202.3349	465062.6529	79087.79219	279665.5036	334152.5363	779340.118	440899.9589	227583.1796	323932.5383	252175.5989	221128.0966	200658.7853	397055.4747	199090.636	207241.9065	694860.414	188205.3846	53646.98035	223559.9906	403865.7419	269051.6067
PI(18:0/20:1)	0	0	0	0	0	947.8728942	0	0	0	0	0	0	0	908.2945849	0	719.6683653	0	970.0484889	0	0	1400.614104	0	0	0	0	0	0	0	0	0	0
PI(18:0/20:2)	0	3091.404868	2294.976343	1040.274198	0	0	0	958.9578802	0	0	2064.128676	0	0	1047.415966	0	0	0	0	1546.383654	0	1554.21767	0	0	2715.369592	1444.972839	0	0	0	0	2103.693042	0
PI(18:0/20:3)	3734.670183	9945.302992	10556.20011	3349.585552	6185.638946	7137.431219	3060.544346	0	978.8860869	3868.997273	4163.297295	3375.363339	2400.473547	2066.611169	0	2089.550967	5707.525311	10165.85135	7777.032222	3229.444861	18175.26411	4042.058606	7060.612352	6078.124985	3613.181068	0	2310.105615	5575.463092	2087.294839	5149.178516	2098.354462
PI(18:0/20:4)	21723.45288	23374.21928	128516.4078	40783.18395	34276.99095	58498.97206	17451.73775	4571.646855	1285.963036	12692.50312	4808.742719	51084.04021	13415.40924	4771.966728	9340.528556	2705.504169	38390.66195	30480.96671	15683.623	15470.37027	27990.988	16608.61286	149838.4402	17374.46397	66703.03992	3753.213732	3910.765196	1159.066762	10989.34721	49544.11363	3188.207899
PI(18:0/20:5)	0	0	0	0	0	237.5194369	0	0	0	0	212.4582963	0	0	0	388.4069186	433.9833919	207.0606905	0	0	0	0	0	0	0	0	212.1877311	0	0	0	0	0
PI(18:0/22:4)	0	0	1571.589703	0	1541.435701	1530.97796	2603.724683	0	0	0	0	0	0	708.2741838	1082.731825	688.0418848	1040.689837	2594.011361	1885.734607	1033.68426	1042.043678	0	951.6674194	0	2419.89698	0	0	0	0	0	0
PI(18:0/22:5)	0	2088.963929	2316.750876	0	2336.456087	1541.412098	0	0	0	1583.707733	1167.091371	927.9049683	0	0	0	926.8407231	943.6010799	942.247613	1697.90431	2057.994786	1042.885613	0	1027.519089	1452.468635	1462.098723	0	996.6069255	0	0	925.1881578	1039.758952
PI(18:0/22:6)	0	0	1660.625005	2739.773775	1719.466837	2569.818614	1800.395495	1039.288135	1085.236592	1543.763545	0	2453.455708	0	0	0	1036.412641	0	0	5158.038645	1577.747529	1046.934262	0	1172.881634	1023.766793	0	0	0	0	1573.991586	1408.58845	962.8732609
PI(18:1/16:1)	0	2071.592442	0	634.7627833	1437.057521	1043.156062	1036.200986	1048.582761	0	1315.616705	0	2092.127201	0	1438.105621	0	1386.662827	1393.037443	1205.064759	2612.261455	1419.014866	0	948.0309591	0	3159.507687	2770.429155	1519.825492	0	0	0	1328.560318	1039.26893
PI(18:1/18:1)	4141.846661	1359.102128	4202.086952	2151.152379	2061.804315	6844.975693	0	0	0	931.1473478	1423.297899	2429.183016	1583.825095	1214.086571	976.5033198	1565.335181	3965.469269	2384.237169	4219.828796	2984.669358	3497.639032	3940.480808	4862.740039	3842.511478	3727.060685	1928.260003	0	0	2088.606186	10617.60297	0
PI(18:1/18:2)	3581.652648	3964.406881	5219.871738	2102.872132	1566.99507	3553.923469	3229.769702	3087.238033	1428.155329	3654.871762	946.527336	2691.314982	2964.434942	3317.592009	1933.524207	3916.179161	7138.85008	2499.447011	5399.674936	5283.033992	3044.955385	2450.177748	2862.935854	2224.768091	3432.554453	0	5033.761483	3494.756623	3878.502212	6460.49505	1262.273906
PI(18:1/18:3)	0	0	0	0	290.999916	0	0	0	0	250.431482	0	0	0	0	0	0	0	0	0	0	0	0	249.7211413	0	0	624.6085885	0	0	541.8784169	0	246.9332994
PI(18:1/20:1)	222.5683767	238.5884562	0	0	0	0	0	0	0	0	0	0	0	405.923723	0	667.729632	0	0	0	0	0	0	0	248.775136	0	0	181.255016	0	0	0	0
PI(18:1/20:2)	0	0	370.00559	0	0	0	260.2297576	0	1048.098349	541.8682836	0	354.9723075	252.2097716	386.8277534	0	0	0	938.0080425	0	0	498.1501836	0	0	0	324.6667058	0	0	0	481.4923083	317.8515589	0
PI(18:1/20:3)	2466.741076	6920.958178	3071.986395	4061.293435	1965.969294	3116.653362	4361.685197	3932.154892	1416.739578	2392.341879	5675.841327	1762.120825	660.8408143	3338.678833	1473.613352	1713.205821	4056.328916	4508.497381	3539.472627	2964.448195	2247.632504	2999.630608	3812.452011	2370.421048	3862.565592	3015.320989	2749.342989	1339.487333	1986.449616	2404.77134	4272.127394
PI(18:1/20:4)	2136.056545	7312.127281	7853.821504	3265.374597	4721.062081	3795.935019	5404.144946	3052.061115	2226.722642	1504.757428	3250.700002	3138.564264	1973.718361	7391.374683	3595.811859	2262.215261	3501.865978	7832.808904	7691.890859	2037.972099	3216.336273	3416.966993	6876.922264	1828.165441	7350.465851	4450.312357	3048.480003	1689.022679	2814.164728	4324.735431	1357.446012
PI(18:1/20:5)	0	248.3857479	0	0	179.7975342	214.2669964	0	496.2914667	238.8636073	0	0	270.5625748	0	249.0184282	0	260.0429885	163.9156698	0	0	285.8317701	0	0	0	0	204.5564603	170.6253858	217.4528703	163.5889881	282.8298223	396.0304267	0
PI(18:1/22:4)	937.5699638	1098.721763	1512.494486	1013.505005	1028.823664	0	0	0	0	0	0	2026.11079	0	0	0	0	2598.017605	0	0	1033.844105	0	0	0	942.4131616	1925.149539	587.0492111	1560.350096	0	2453.668683	1041.644375	0
PI(18:1/22:5)	0	2338.137804	947.0275232	1816.992771	1554.485353	0	875.5708474	616.4428284	0	1616.00628	1141.70462	1317.106394	401.7096573	1401.275533	667.2544818	1332.487632	1174.249195	720.8391957	821.7038699	1356.801272	999.3191677	350.5963066	2179.040066	363.5255155	1941.975462	478.7625634	852.102675	0	757.4811962	659.8671044	904.8672523
PI(18:1/22:6)	0	1641.715704	821.0641027	2551.384519	3381.941321	1940.415569	1366.211001	2603.865038	0	2233.485597	2366.057543	1769.211532	0	1938.63458	576.6390599	2238.127235	1666.012469	2298.058199	0	672.0819839	1564.964223	0	2569.847334	1380.735487	1160.852675	1721.624915	1716.265133	553.3087081	0	1246.733759	958.5099834
PI(18:2/16:1)	44185.65819	280733.055	97023.56485	243871.9211	205505.2467	122524.6266	118854.0577	242163.8316	228639.9138	203668.7331	111565.6551	167345.5779	64585.56223	291509.4226	167599.1266	228665.5524	228126.9351	342750.9736	221823.2592	296886.4778	132671.8839	37572.33642	269751.6891	78108.15622	222980.9022	213906.2663	115863.9255	39999.1233	115309.5251	275356.0057	155990.2024
PI(18:2/18:2)	2957.287798	3382.630951	3667.685887	4458.287913	7654.996063	1308.18415	953.0265032	15520.76525	909.4176264	3682.442333	3498.642307	2534.115345	5083.521595	3776.408565	6400.761101	3623.64767	5327.32243	7989.856538	8025.404724	8947.890884	8282.840378	1534.050839	10229.12581	3302.16431	16505.56007	9162.543775	4288.321833	481.9841758	2456.561699	14895.71417	3913.621615
PI(18:2/18:3)	0	0	0	367.0516069	170.0723344	0	0	228.3718549	0	0	0	0	0	0	246.6504313	317.6511981	0	0	0	0	438.9420829	0	0	0	0	437.2689381	192.4777459	0	0	491.4312271	0
PI(18:2/20:1)	0	0	0	0	0	0	0	180.4904775	766.8594477	170.4257357	0	0	0	0	296.7571697	0	0	0	283.2253159	0	205.2424932	422.9976584	195.2418717	0	0	0	0	0	0	407.139355	0
PI(18:2/20:2)	0	311.1328128	0	190.5281823	253.2587453	0	246.7497428	205.4578023	0	229.927381	0	351.223521	0	0	217.3692891	284.82679	0	0	289.8558566	0	0	161.3880538	0	0	0	0	158.4649504	0	0	0	0
PI(18:2/20:3)	0	2463.585503	2288.014537	826.7985331	2226.365838	1123.664766	1406.930981	1862.505934	2141.350627	0	2352.075522	1045.556065	2310.087561	491.6725713	1837.605665	1166.690076	0	654.5399221	0	1282.542452	1150.891178	0	1658.293268	1039.051382	0	5384.751634	1525.676878	715.8022458	1809.527	1903.868112	0
PI(18:2/20:4)	4146.757155	15952.23307	13124.49486	21514.03033	22435.42829	8626.351012	11602.82568	17539.19528	9069.141778	17652.09083	4868.189644	23958.18753	3816.977472	13058.41583	8074.348134	19637.88734	27535.21072	80287.83751	6020.806968	26693.08938	9590.093181	4774.191441	13763.83996	3353.055884	25554.73044	11080.54811	10365.01737	4467.743686	15331.34062	23107.87819	9122.370415
PI(18:2/20:5)	1691.537104	0	0	0	0	0	0	0	0	0	0	0	0	241.1134527	605.68102	748.8480165	0	0	0	0	0	0	0	0	0	1736.047726	0	502.2659491	0	0	564.8212611
PI(18:2/22:4)	0	0	0	579.5492095	0	0	0	1062.038583	0	564.2945616	0	0	0	1400.671463	587.4664344	1126.151231	0	578.5082317	572.9951506	0	0	0	0	0	0	1745.005886	0	0	0	0	2340.188638
PI(18:2/22:5)	0	0	2772.171818	668.4527612	1048.066545	0	0	1776.375298	1243.110537	804.7438977	482.9027538	504.063631	969.6447071	471.6565087	2308.57286	387.9199633	439.73228	0	393.1371146	1609.731393	589.4625035	841.0842926	1309.171895	762.176836	841.6138658	2578.709943	716.2411033	0	610.9129581	0	0
PI(18:2/22:6)	0	537.4389294	1366.046934	1604.228999	1364.475446	0	2198.308335	1188.456226	0	860.0516818	0	1741.112635	0	1385.505628	869.587517	0	1501.89351	4392.211138	835.1680666	2072.092979	2320.805991	0	1099.763059	848.7998394	746.8822789	2616.087883	0	827.8553991	1420.044497	2697.007649	2991.75978
PI(20:0/16:1)	0	3910.924775	4109.961203	3577.031561	5007.290053	1401.932153	1953.535137	3729.641861	2064.461436	2849.252077	6167.860047	6201.525744	827.4199333	3161.842589	1764.379525	6084.819997	4020.310468	3275.569954	8065.910982	4996.101466	3237.266768	1861.663699	5470.416863	3550.997366	629.6605873	3402.472515	3077.392176	559.423404	1341.473722	4172.901462	3683.928902
PI(20:0/18:1)	2601.574589	62287.4666	35643.95009	43261.58608	35215.92036	7470.085098	37609.22312	33389.3603	32277.51204	63093.25907	23765.6167	87026.55555	5229.470143	41699.86081	30960.05476	81496.52143	57706.24756	15955.15601	53692.06571	23671.1372	28466.31202	14799.17635	47041.0017	22907.54624	24830.84841	37690.88718	34178.27638	8642.750216	17035.20382	59146.27755	25240.89531
PI(20:0/18:2)	1325.58801	3921.533609	9098.087568	10524.26317	5472.125219	5046.03844	14329.87373	9580.197596	6556.734541	5083.855175	3618.924824	11585.44349	1372.476392	17176.47727	7457.963569	19872.58037	8367.291097	6889.702528	26840.55549	9815.645267	6943.650947	4607.822064	12607.37995	6691.406243	7980.784595	7650.546363	7948.39976	1956.88171	5262.976297	17284.07472	12737.22523
PI(20:0/18:3)	0	537.4411849	0	0	0	0	0	0	0	0	0	0	0	0	0	0	0	858.8060783	859.4318961	0	0	0	0	583.6412066	0	602.4268461	0	586.9678414	0	0	1159.921484
PI(20:0/20:1)	0	2168.833998	2044.165221	2474.234926	815.5357023	0	4412.333668	2021.161574	0	2286.438843	2432.606628	6716.046789	0	2760.859686	2896.055671	5324.148232	5091.211006	0	2230.713861	0	0	2872.220439	4398.450248	0	0	3479.33461	911.0223697	0	926.5344389	3543.832767	0
PI(20:0/20:2)	0	2131.357312	0	0	0	917.9516131	983.7172516	864.6774154	2317.4348	2504.939582	0	4650.941016	568.1778652	4170.355937	4049.085405	1949.426159	2772.067763	1134.135644	1918.075434	942.5465544	961.2998944	0	829.5748794	0	2399.219887	3185.586861	860.4722509	0	0	3991.361887	1194.473189
PI(20:0/20:3)	0	1347.853851	1466.249541	2143.302897	0	899.4538008	1895.445573	4535.738284	1798.912183	1157.061932	1842.023388	1211.594435	0	1399.642787	4593.518341	2582.947033	1182.827612	1985.461043	1412.983243	1620.183423	1422.068149	0	1947.992488	1347.055753	0	1638.96399	0	1236.176647	1778.578524	1501.622332	1580.59847
PI(20:0/20:4)	1133.973434	5689.01254	6074.853972	3833.386769	6938.388377	0	2014.969832	2702.603503	2018.5491	3170.886398	1513.321583	5312.265035	0	7523.500146	1932.299402	5165.47367	2505.442677	5858.068392	10552.91268	5890.939615	1853.096401	1995.11057	3509.620092	1530.95387	2778.807383	6683.6761	1868.676136	736.1361232	1338.772146	3116.952673	3812.356202
PI(20:0/20:5)	0	0	593.6919855	0	0	0	0	0	0	961.1471876	0	0	636.2985428	0	0	874.7285452	0	0	0	551.0482005	0	0	620.0723859	0	0	605.1754861	0	0	0	0	0
PI(20:0/22:5)	0	0	815.2676385	1059.60079	0	0	0	0	0	1111.318619	0	0	849.6151282	1187.397496	606.1322853	0	0	0	835.0053244	0	0	0	0	0	0	253.0307547	0	0	553.9713486	537.6583104	0
PI(20:0/22:6)	0	0	1015.385415	0	0	0	1622.097537	606.7020704	0	0	0	0	0	619.4468006	636.7204093	0	1518.227278	0	969.8042443	0	0	0	0	0	0	625.5689602	0	0	0	0	0
PS(14:0/14:0)	0	0	0	0	578.6794814	0	0	1217.073988	0	0	0	574.5629783	0	0	0	0	0	0	0	0	0	0	0	0	0	892.8829169	0	0	586.9614775	0	583.5048672
PS(14:0/18:1)	0	976.4860094	878.9481082	0	769.6452381	815.4265725	0	5146.615034	0	542.6457611	0	0	0	0	2716.548046	994.5417584	0	199.3004829	0	164.5208407	0	548.3115109	0	0	0	5146.862628	208.7712672	409.7999765	0	0	0
PS(14:0/18:2)	0	4881.439834	2065.721847	1418.182752	1705.860971	2009.168708	5943.02404	8174.026862	3028.47318	1765.705735	0	2621.319982	0	2643.130646	2395.49627	2655.206308	1418.826811	4607.563061	1667.069347	8067.010728	1689.709494	1416.62341	2356.973821	882.7594609	6253.97426	5146.845706	3230.590461	0	1572.792867	4080.872782	3782.001371
PS(14:0/18:3)	0	0	0	0	0	0	0	0	0	0	0	0	0	0	0	0	0	0	836.0453519	0	0	0	0	0	0	0	0	0	0	0	866.9579385
PS(14:0/20:1)	0	0	0	0	0	0	0	0	0	0	0	0	0	0	0	0	0	0	0	0	0	0	0	0	1003.492116	0	0	0	0	0	0
PS(14:0/20:2)	0	0	0	0	0	0	0	293.358598	582.7655875	0	0	0	0	0	0	0	0	0	0	0	0	0	0	0	573.7359205	0	0	0	575.9514028	0	1166.410022
PS(14:0/20:3)	0	0	0	0	2061.82447	1088.265663	0	2626.471871	1564.083202	0	0	0	0	1491.785685	0	0	2067.864259	0	0	0	0	1543.492435	0	0	0	1177.438353	0	0	0	1165.791442	1535.205585
PS(14:0/20:4)	1039.031949	3014.109492	6109.941987	7177.986507	10769.03895	1553.143513	3949.837741	3655.970337	6502.305017	5926.825989	5959.61327	3210.678096	3121.794523	5886.192851	9213.427415	9851.910495	12628.94898	10194.75086	15501.66882	7964.168576	4124.544636	6707.32761	6088.909093	1402.592598	8975.572661	9384.755843	4375.999717	5042.904546	6377.09715	2065.574279	2526.671542
PS(14:0/20:5)	0	0	0	0	0	0	0	0	0	1511.884708	0	0	468.5736833	0	0	1003.762397	1566.865889	994.4016946	0	0	0	0	1041.353241	0	0	1051.398181	0	0	0	1049.058002	1018.09142
PS(14:0/22:4)	0	1516.054761	0	4116.352562	1031.088735	1526.441955	1030.930297	2611.777345	4122.479083	2570.730502	0	1537.418545	0	2523.404338	2035.02575	0	3616.168059	2949.327705	0	1732.958067	0	1514.723734	1999.828651	0	3592.178516	0	987.6250204	0	3998.017777	0	1544.574298
PS(14:0/22:5)	0	156.6676768	245.4972448	254.1242976	0	0	285.978137	1967.896422	1011.960262	0	0	267.2966977	0	310.8595979	2395.679973	0	438.5633705	0	142.6012755	0	0	0	140.2415273	0	0	2989.751035	233.568699	0	246.7754179	0	252.9517307
PS(14:0/22:6)	0	0	0	971.5639714	2442.668499	0	962.6531191	0	0	2547.954753	0	0	0	0	1096.322549	0	2956.671979	1217.747555	0	1177.065857	0	1453.547929	0	1198.432245	0	0	0	0	0	1157.916402	0
PS(16:0/14:0)	0	0	0	0	0	0	0	1141.204626	574.5798387	0	0	0	0	588.1854713	593.3589157	0	0	0	0	0	0	0	0	0	0	0	0	0	586.2767628	0	0
PS(16:0/16:0)	579.7197384	1005.11613	1125.338572	0	0	0	841.882711	3760.128547	608.4916717	745.9040522	0	1046.777201	0	0	600.9375004	2316.870578	0	771.8569881	518.791015	0	715.9422397	547.9971032	0	0	550.8013452	1783.79117	0	580.7354659	587.6090764	741.3858397	0
PS(16:0/16:1)	0	591.7169444	1182.546677	0	0	890.1489488	0	0	0	587.0622166	0	574.5629783	0	0	599.0725108	0	0	589.1506211	0	1161.58999	0	0	0	0	0	1696.077851	0	0	0	0	622.3232058
PS(16:0/18:0)	6782.376178	14719.56317	4761.884841	13605.55148	43700.37018	14073.11469	12462.31185	8263.040372	13056.32197	11451.06853	7936.713982	9685.738748	8884.56319	10399.70534	15881.23116	12483.21156	10823.04487	21012.23043	35318.974	27780.3743	17418.71882	4682.97894	10582.71716	14891.65662	6252.090832	11247.21207	5878.274861	4462.770285	3363.702119	31278.02712	11901.56892
PS(16:0/18:1)	2061.662769	3397.214045	1397.242415	7063.33208	5678.915746	1044.56526	1755.412495	2374.877215	808.8051999	1478.457993	2508.20428	5818.53065	1533.933016	0	2324.516743	0	2263.426433	2606.553581	2692.458028	1897.008373	1356.420282	5012.709897	3532.34417	1543.645625	4832.542191	1728.30802	3525.761396	5003.478956	4215.459265	2474.902529	5645.145824
PS(16:0/18:2)	1438.737587	2797.693497	1564.428288	1425.364808	1488.688286	1264.3029	1034.39581	7705.526858	2603.017952	1794.930197	2988.402889	3276.469555	2016.530274	6341.181752	3135.176395	3544.423122	1395.4065	5014.831157	2735.738434	5902.735085	1055.771311	1543.898043	4790.420875	0	2073.948887	2054.82379	1003.17301	2370.949611	1567.103178	3303.126937	2374.37802
PS(16:0/18:3)	0	879.5361796	0	0	0	0	0	1189.228653	0	0	0	0	0	0	0	0	0	0	533.2180762	0	0	0	0	0	0	0	0	0	0	0	0
PS(16:0/20:1)	0	0	0	835.6389148	969.9732468	0	1441.066299	484.1764475	1045.699484	1498.770002	0	0	0	0	0	1540.757981	1457.985789	1017.676336	916.2792384	1073.627797	0	0	0	0	0	0	0	0	0	0	0
PS(16:0/20:2)	0	0	0	0	0	1162.187613	0	0	2116.393097	0	0	0	0	0	0	0	0	0	1293.668029	0	0	962.4366231	0	0	0	0	0	0	0	0	0
PS(16:0/20:3)	0	0	1043.816503	1546.218203	1034.726234	1452.681066	0	1016.154623	0	0	0	0	0	931.7917885	0	0	1970.565296	801.7312195	942.920893	1041.584215	1565.013424	0	0	0	0	0	1568.504559	0	2001.116335	2075.76566	0
PS(16:0/20:4)	1558.140611	9367.539859	3934.963685	12969.32688	12285.40061	1531.580521	1120.600298	9586.508323	3912.230577	7860.168923	3980.391152	11886.22002	3611.175084	7525.458029	5247.351619	6727.994632	7835.263791	10001.64941	11717.03708	12188.42176	6626.055362	2670.573654	7020.667865	2991.665785	1744.881217	14311.94844	3781.030613	5010.578633	6875.038006	6830.582107	5565.059142
PS(16:0/20:5)	1047.339299	0	2089.000888	1941.194769	1534.378064	0	0	1046.050829	1046.171042	1497.249419	1003.07574	2597.89378	0	1317.560775	0	0	1437.155094	1049.547316	0	1564.037974	2028.492316	0	2061.953256	0	0	1591.136702	0	0	1532.359841	1194.149702	993.8837597
PS(16:0/22:4)	0	0	822.0873318	902.8635991	2969.155699	1009.313844	0	3639.42667	2220.99848	1126.208865	815.4605026	0	0	0	0	0	0	0	1099.086702	982.0429537	0	1020.585033	1195.036584	0	0	4169.136619	0	0	0	0	0
PS(16:0/22:5)	1007.380365	1452.945296	832.1528579	1525.905244	5205.818143	1016.896346	0	2574.939188	4167.800049	0	0	1515.668562	0	2062.770317	2454.162804	1546.375361	3117.543195	0	2598.282674	2512.13396	1602.895166	1512.190213	2082.956139	0	2078.732817	3632.013607	0	1931.666042	1529.183785	986.8857132	2583.81791
PS(16:0/22:6)	0	0	0	0	0	0	0	2610.977602	1553.701872	1017.029399	1019.929237	0	0	0	1042.518428	0	0	0	0	0	0	0	1270.570448	0	0	1543.196747	0	0	0	1007.767752	0
PS(18:0/14:0)	0	2016.298567	3027.890146	0	2556.519629	0	2575.475382	0	0	0	979.050645	0	0	0	1045.362217	3485.229465	0	0	0	2525.510723	0	0	3769.073521	1511.257537	987.5765758	0	0	0	0	2169.909643	1023.982125
PS(18:0/16:1)	2610.444363	4558.576659	5228.339718	2582.240188	7741.663924	1035.55881	0	0	1045.212132	2131.475254	4926.81163	3336.376463	1539.491393	1006.033554	2726.304499	5014.732949	8248.045968	2084.036618	5229.238929	2525.7086	2543.534615	2566.412528	2206.272607	3544.031223	1946.602234	3591.579741	1524.981875	0	0	2068.505884	3116.679952
PS(18:0/18:0)	84376.98555	668098.6556	437857.4507	842107.4247	1001730.712	63972.04408	287910.6513	205354.6827	276165.3107	530993.509	933936.7201	605598.9735	178080.1674	425314.816	430380.8963	566505.0922	804198.3252	191407.383	443101.2045	264203.1505	270668.9592	478780.3656	805046.3289	477882.2316	233884.6811	619446.2363	363073.6711	205248.8412	269360.0437	194607.9247	346427.5725
PS(18:0/18:1)	10849.60756	71454.82092	55967.12666	101480.626	115879.5187	10419.08495	45732.04498	17468.48176	42433.83616	78160.00415	83322.20293	134998.0892	35104.29859	63994.18195	34371.77495	73629.54577	104270.7971	22787.95354	67572.7356	35477.64356	45977.79848	65899.4618	92471.23216	50929.63897	37138.76941	45411.54087	54855.73729	37014.43377	40732.46144	30664.09431	44962.1713
PS(18:0/18:2)	2584.465696	9325.619046	11869.57885	10113.08812	14494.39555	2472.009217	9844.829819	8410.249451	11777.7491	7076.720852	9595.450444	15028.39651	8253.107658	8758.064659	11520.71513	12529.23051	19003.37705	15177.34635	20824.79047	6877.466663	14904.08741	2585.614305	19218.01239	7292.338453	18832.88846	10758.59297	8169.800938	1518.536219	8907.277513	11352.23098	18123.72325
PS(18:0/18:3)	1117.925145	1365.188302	1498.650744	1091.570915	1827.247831	1916.669197	1619.576754	2372.130284	892.78552	1453.944305	1094.303411	2090.675918	1135.426157	3471.984988	1369.758907	2319.451144	1326.007971	1823.830166	308.9910674	2062.041274	1184.819471	835.3379101	1223.235546	2401.02422	1796.971573	653.3801851	1603.582962	911.5607248	1600.990736	2300.29591	2177.89071
PS(18:0/20:0)	7413.352365	47439.52149	93828.97534	45646.01208	40000.18334	15957.2388	22375.11057	28475.12683	12829.08389	18050.89356	20231.59172	46064.58767	11753.69472	28914.52346	28398.99446	127723.634	33244.81466	19826.54456	22261.5238	61711.2088	17980.71748	25474.13248	35189.8662	14761.99488	77701.54705	61542.06533	18065.39738	8695.202377	17917.62429	34915.02303	50230.01904
PS(18:0/20:1)	1039.989034	2106.105402	1017.393448	7271.08743	3115.505744	0	0	2093.189397	5751.381246	1042.075758	2075.012876	7817.148923	0	2191.434555	1051.699096	0	3499.613682	2606.214435	3649.595112	2084.230788	3130.165398	2080.161115	2083.852223	2084.922824	1038.896588	2092.840407	0	2594.037293	2562.618432	1551.770053	0
PS(18:0/20:2)	0	1541.110492	2074.17077	1559.340174	1925.491945	0	0	2087.464963	2093.036281	1545.504558	0	2082.915003	0	2060.146942	0	2577.347725	1570.323962	0	3623.908676	0	0	0	3588.971473	2085.632337	2028.66809	475.2731435	1033.230225	0	5173.687429	0	0
PS(18:0/20:3)	172607.6294	811725.0292	387790.8054	242493.9183	459391.7637	311669.1291	268634.2577	549292.9163	256775.6436	330341.514	380192.7839	539713.8866	379148.9652	255774.5917	302402.1962	194450.8241	451222.3329	448560.6903	313133.5409	516274.116	264605.2569	207624.9357	325627.6872	383868.5168	233010.4117	537797.1782	242782.4124	227110.4072	531555.2108	377336.2961	249907.3647
PS(18:0/20:4)	5742.477713	11369.28868	11962.02994	12967.71848	19778.3145	5286.106969	4702.01474	23026.8014	13357.85621	10367.68177	7492.96951	17547.30065	3631.411532	17912.34572	9598.192343	12232.74566	25459.81523	14128.98897	31061.59511	9736.48367	9900.707215	5791.254607	15100.98052	10425.02368	12857.00475	10872.70283	2608.121131	9915.608695	10429.63458	11787.67203	18666.40144
PS(18:0/20:5)	0	782.1680973	1618.034704	3204.940749	0	0	914.4456919	2302.378929	2069.833376	2433.883252	819.1604725	1206.282968	0	1055.867574	1007.816814	888.7488737	2590.24586	1715.048622	1583.495328	1551.260009	1019.808331	1232.245637	949.6240873	1880.033073	1191.07966	5096.186956	2321.41537	0	1060.820038	791.9881982	1650.861887
PS(18:0/22:4)	2104.344217	2284.803232	2290.235208	1636.517329	3340.964238	1661.981045	1196.059842	1272.116993	864.4977416	1260.298258	2407.547939	3907.06004	1870.015588	2828.913265	1472.276963	1543.436707	1299.134554	2539.941984	1108.69453	2432.591605	1517.255031	1002.880991	2455.776345	2491.979117	2097.33953	2022.03633	1943.306961	2587.192812	2348.519383	1893.914466	1369.324378
PS(18:0/22:5)	18990.5972	62776.7397	98741.05929	37831.61105	41346.00473	22753.11503	35053.27826	36233.24178	41050.08187	19962.01708	26453.91269	41313.86237	53658.89757	43877.78915	31128.22168	40054.12933	124658.2239	66158.1466	40658.91951	62078.75916	26268.9739	27818.6952	49873.68559	85834.53941	34339.90257	39999.7639	24567.7953	37872.26724	51605.73166	28732.48998	48042.47997
PS(18:0/22:6)	0	2619.258835	0	4222.601862	3131.824818	0	0	957.1926231	1054.541499	2610.144956	0	1045.908765	1033.731024	1024.009221	0	2076.377105	0	2005.25795	988.710589	0	3152.709463	1040.836903	2958.003912	0	1904.020019	2111.791696	0	0	0	2101.879497	1031.500087
PS(18:1/16:1)	4280.78159	7169.248854	7940.937986	9499.728811	11591.84474	3594.327029	3639.108014	8353.824374	3167.488338	8515.404551	3846.062418	4789.232785	1030.50224	11046.1825	4266.895428	7527.1346	10455.56496	12493.46387	11085.39611	3163.680646	4801.191249	3359.043823	3827.399291	4470.167976	12324.72377	10220.65262	2198.845855	4905.843902	2882.197397	6249.617667	4290.825362
PS(18:1/18:1)	2579.408701	5102.848765	2797.8284	6754.341045	2095.301315	6198.994224	3428.496264	8648.252573	6581.921922	1397.356145	0	1676.445468	0	1330.737997	3057.455717	7035.897754	7100.262354	6350.844897	5375.220356	10193.41985	5014.405519	1541.261637	8413.361484	1046.709499	0	2346.877829	943.9275117	1374.557927	2516.990204	2556.292621	3359.712408
PS(18:1/18:2)	7210.383852	7898.745368	9456.839591	12810.9707	9496.079624	6139.760641	7416.119605	37420.45339	7067.120327	5841.547531	4179.400542	11768.84737	5351.591604	15948.61075	3872.188995	6732.158514	17565.72932	30303.93819	10636.23691	16863.02036	17799.24891	2499.894078	17808.42155	1876.227203	21427.13308	15632.32372	5230.088077	2021.70433	1476.616008	21114.6144	18690.29336
PS(18:1/18:3)	0	0	0	0	0	0	0	0	0	0	0	0	0	0	0	0	0	0	0	0	0	0	0	0	567.0857883	670.0944169	0	0	0	890.9883126	576.3199563
PS(18:1/20:1)	0	0	0	1032.848319	1513.168341	0	0	0	0	1045.455056	0	0	0	0	0	0	0	0	0	0	0	0	1026.311677	0	0	0	0	1556.296316	0	0	0
PS(18:1/20:2)	0	0	1554.15148	0	1550.775882	1555.551047	0	0	0	0	0	0	0	0	1093.459137	1014.235398	0	0	0	0	0	0	0	0	0	0	0	0	0	1563.649022	0
PS(18:1/20:3)	1539.112689	2457.705512	0	1555.970053	2989.447363	0	2064.926197	1803.592791	1226.989587	1390.359966	1546.849012	4442.389329	1041.049782	6088.621071	1956.526063	1479.0135	6004.542412	1859.874798	2425.842812	3071.879989	1995.60181	0	2075.15415	0	6253.448723	5032.022627	0	0	1272.059063	2804.382135	3246.628913
PS(18:1/20:4)	5020.654107	53369.36034	29554.94807	35520.25897	76347.94054	11924.62142	9865.696225	48350.84011	27072.24932	27241.24464	9876.515076	50934.17085	13089.0367	52916.57056	39019.96238	23375.38324	38273.31176	64822.6038	69997.59985	62268.13403	22273.89229	12789.93048	53812.80119	7925.632187	60782.13811	73384.73223	15319.42725	11625.10602	21854.38122	46739.57582	42298.38946
PS(18:1/20:5)	1041.119995	4170.56574	1050.568929	0	1433.726811	0	1021.757998	0	3668.914091	0	1005.892811	3126.797311	1560.794253	6487.240948	3117.903183	3643.61864	1679.491669	3489.791523	0	3425.466376	989.5957964	0	1563.947926	1041.347904	2085.160137	3453.003173	0	0	0	3125.645552	0
PS(18:1/22:4)	0	0	0	0	1394.707286	0	0	8823.20078	3678.264676	2754.848769	0	0	0	3946.614402	3247.579722	0	0	1174.488678	0	985.6481956	0	3031.106466	0	0	8471.516435	5023.949589	0	965.3654594	0	0	454.4681147
PS(18:1/22:5)	3121.901927	4979.653256	1828.448476	4224.513805	2727.805819	0	0	2603.52612	1900.025037	1560.374768	0	3675.439961	1564.530884	3583.46355	4139.357495	2660.7225	0	7300.601716	1384.926344	8861.21485	1496.900344	0	3634.916864	2818.594421	7390.557844	2834.848589	1429.362186	0	1553.85558	2608.992476	2541.426311
PS(18:1/22:6)	2602.03594	6397.864611	1044.831421	6631.392249	9944.370191	1569.768045	2612.843213	6296.148166	1058.848729	6239.689591	5716.491379	7747.516431	1043.663575	4499.357133	3150.988012	11992.53629	10360.77627	8074.844003	6342.23064	4480.506083	6969.628713	2617.426699	8396.830417	4383.701882	2220.302732	15264.69197	1458.845368	0	3092.053337	2773.975448	4161.622257
PS(18:2/16:1)	6207.367304	10885.38042	10509.90595	13252.32709	14023.3906	8889.104456	14370.42695	24390.41189	11865.13608	18507.19732	8722.047992	17856.28506	7204.866407	41307.60978	14360.25587	14120.81177	25813.43184	24208.15581	30740.785	19397.65387	11880.1068	4710.289095	21408.21944	10013.14828	22789.13714	21617.00901	13435.25377	6378.247529	7966.369051	17300.46119	20932.62746
PS(18:2/18:2)	15508.31145	12457.35513	35423.88037	44394.48875	29989.79183	14664.61606	20184.30632	46872.25911	15318.47356	26284.58821	10809.64318	29954.32575	11713.19377	37705.3034	22176.67341	21747.827	17410.10674	35750.10435	37403.61405	28631.56158	16197.47768	4041.348198	49955.07183	5180.42357	22176.45323	47130.68526	12429.41441	5194.036895	9571.30825	53014.02859	14316.71647
PS(18:2/18:3)	0	0	0	955.6830214	0	0	0	587.9239351	645.9594353	0	0	0	0	0	0	0	0	0	0	0	0	0	0	1715.168815	0	0	0	0	0	0	0
PS(18:2/20:1)	0	0	0	0	0	0	0	1045.602599	1611.997736	0	0	816.4126063	0	0	1575.428966	0	655.5891741	0	562.5052836	0	0	0	0	0	0	0	0	0	0	0	0
PS(18:2/20:2)	0	0	577.5550646	0	0	1173.117671	0	0	0	0	0	0	0	0	0	577.4404413	0	0	0	0	0	0	0	0	0	0	0	0	575.3345335	0	0
PS(18:2/20:3)	2774.84418	3301.882616	4453.562624	10160.27829	16739.13303	1088.822704	887.2319608	12112.35687	3276.596672	1902.350993	5204.439723	5777.68135	5734.681357	11462.16724	5996.780155	4141.266539	13066.68578	8745.835243	6632.425723	5539.823574	7258.726695	1460.244061	3127.295349	2086.192185	12640.21995	18410.86282	5751.188887	1769.879345	2100.018204	5612.100094	3449.814202
PS(18:2/20:4)	16833.44521	39535.77987	47861.69726	42120.54916	88857.29165	10875.85703	14338.82028	56984.35596	32795.26394	24183.09022	29257.29576	72044.62083	5945.397975	31040.32167	44560.34221	29750.34266	40520.01892	88081.31516	106437.5166	63066.66969	25123.04089	32049.52885	77649.92613	36503.235	88024.11033	46676.94778	34339.95603	28039.97072	39143.55423	62166.03839	19959.60217
PS(18:2/20:5)	1014.249259	3101.232464	1576.212181	0	4490.264038	1416.258353	2256.400459	2125.770875	0	0	0	0	0	1577.060088	0	1493.844702	1572.472917	2084.197091	2373.702353	2913.116687	1540.103293	1572.023938	2057.642555	2036.387527	942.8594404	0	0	1048.886066	1040.765833	1025.302412	0
PS(18:2/22:4)	1023.316632	1842.349707	5329.844367	4249.036981	3741.103482	3538.18707	1039.40577	2692.811274	1429.284268	0	996.0001087	2611.955613	1001.324263	3985.212926	3130.248733	2223.135292	4187.507964	8904.794488	8023.300818	7989.448704	1016.562923	4542.199873	3870.889441	1540.774884	6911.273403	6571.211684	995.5500669	1032.326908	1788.389856	3708.815088	1534.818347
PS(18:2/22:5)	0	6465.073007	2892.263967	4179.609246	8162.910404	7140.387198	0	2125.75785	0	1949.060863	0	996.1612939	1000.250259	2268.979675	2290.127464	3988.959799	4733.967622	8645.963302	7172.475424	10159.1099	2312.084882	1385.973092	2802.195818	2977.97822	6142.369051	2874.563341	3987.911667	997.3988133	2435.510635	7675.680779	6426.394734
PS(18:2/22:6)	3146.868318	5077.60018	4539.876388	3991.818436	12767.29049	2553.575594	2779.161507	2474.91791	2490.469799	1517.316791	1681.045388	6770.77771	2439.905485	6725.068883	1680.71616	6977.77714	5379.705079	4846.842721	8838.155285	3545.478694	5573.048538	1801.098478	5491.010712	2375.61472	6850.815244	2155.032515	0	917.5537578	0	5411.472356	946.1830741
PS(20:0/16:1)	2009.841154	31518.09152	83906.21407	36083.89548	44027.41928	7010.421336	28345.2433	16703.86482	15949.91594	12956.29784	19449.94109	44917.85559	8338.385044	11218.87544	23860.46821	39045.4784	25952.29816	27869.22482	29014.03174	62697.10332	40252.67797	37399.94238	19178.48116	10932.62263	52308.40489	39635.37347	8510.849777	11703.51366	10487.80665	29288.59287	29271.27529
PS(20:0/18:1)	0	8693.434011	7940.634458	7223.152042	6032.386118	1262.010946	2287.691575	3712.587094	4825.468025	3003.023932	3002.793987	7270.174066	2230.499698	7483.293975	10793.26772	1241.22074	10188.09676	5596.560664	7577.693596	3231.667261	3035.881693	5093.740971	6383.377399	5029.957578	6654.954523	7914.50424	0	2000.562947	2001.189497	8018.874426	10296.58751
PS(20:0/18:2)	73514.80847	556075.096	303165.4023	477906.0843	495621.1377	119974.9229	281941.1979	446182.7183	360562.6312	283475.5298	302591.8113	665864.0538	175378.8355	383582.3325	249074.7518	369241.9258	356305.1443	339797.246	350905.7644	349168.3861	303727.6132	175631.1754	477184.9663	143141.2919	352929.7488	378274.5545	293407.1789	125220.4338	208649.9268	453823.6808	202258.7954
PS(20:0/18:3)	2293.117335	9394.738459	23176.09985	3967.230199	7487.256314	3452.704987	5459.331636	6719.228116	5453.44686	4096.121591	8210.903071	8426.497565	1455.158833	2290.287556	3381.742537	1901.144055	1133.240359	8169.334146	12161.85073	7454.51577	13199.57792	1886.698128	8502.08344	3147.757714	8420.458247	5782.891095	5307.59137	884.0257002	3489.105731	9993.487906	8833.85898
PS(20:0/20:1)	990.7422538	1192.151015	1715.843872	2070.304125	2253.708042	834.4098489	903.4163168	1195.381243	1701.555754	2030.719978	1450.14175	2821.666257	0	869.028824	905.2097633	1151.998541	3390.005093	1980.186671	3468.020167	2213.750228	975.0406391	0	1725.229247	1143.599931	1409.974549	1628.497751	0	2027.233194	871.0707337	3572.951613	567.9236591
PS(20:0/20:2)	562.8901414	12975.25943	11237.3926	6562.64479	8685.610749	4352.692135	5201.380532	11670.95953	4937.742981	8172.609486	10305.5602	8335.358361	6322.755016	10766.76862	12214.12468	12214.07433	5641.619361	8199.269239	8714.025129	10134.58468	8720.268651	4231.991259	5310.956705	2089.776194	13475.27152	9937.635971	4644.67014	2384.750673	5201.862173	14106.03145	7351.163689
PS(20:0/20:3)	7659.972355	65892.58078	66647.00172	35549.20667	66429.26342	15355.48459	31546.84259	44929.0038	10610.31075	27726.75862	37700.16575	70047.78004	7332.082314	36162.68618	17116.00624	48535.63993	32460.19037	35491.65211	13660.14214	54188.08995	19133.68069	27648.62384	25395.68435	10356.66021	70736.76756	55779.73965	24696.89117	8390.33865	8184.947853	30903.83883	18230.35306
PS(20:0/20:4)	20872.32766	109183.4533	125655.7371	117895.7243	172920.4795	42801.94337	50119.25882	107518.7214	62978.50716	65176.61013	80478.31284	176432.2854	29803.80465	103905.814	98351.32829	104173.8986	103962.9982	96024.98852	109815.5479	147994.0705	56449.31871	65360.32596	87092.04084	37511.81325	137500.6271	121265.7829	68637.94153	30563.79648	46120.17991	97726.84521	51613.81726
PS(20:0/20:5)	849.5847309	5212.131933	9034.659853	2326.484454	15198.63115	1834.733206	2599.552355	3554.642816	2995.413337	1445.64912	1737.734882	3038.99337	568.1675414	1741.63588	1167.883193	4959.21558	3509.17975	5786.425861	7324.859999	6517.956782	2447.168632	1778.032653	2722.868706	1700.110217	3416.582195	5168.605772	1944.792324	0	791.1601619	4913.629887	5356.449172
PS(20:0/22:4)	746.9164733	6042.441145	10789.77192	6168.47921	8121.38891	1260.307026	3909.848077	8646.988661	1731.159233	7498.82819	4007.643196	14472.68637	1133.725688	5234.927522	8179.483423	5926.554598	4867.654135	4906.063762	4136.466637	4782.717822	2989.583818	3089.812245	7084.831612	839.0997777	8392.980998	9362.531782	3208.920758	2370.927791	3682.406199	6769.629651	5533.210562
PS(20:0/22:5)	1436.321898	13591.45141	12220.94412	5378.337799	22382.73545	6139.716927	4379.808431	10532.55391	6508.387562	9400.360848	7718.671651	18966.0291	3345.712638	6296.687038	6311.659334	7430.382825	5729.890776	9079.313554	10478.41102	14246.59766	6229.808249	3312.091791	12562.31901	3505.388528	8247.290723	14367.37238	13311.68869	1456.940735	5482.576392	6393.725088	3799.699303
PS(20:0/22:6)	2761.627055	19639.3069	13676.49791	17179.52683	23030.72232	6023.415816	12524.91939	19755.26159	9549.039812	13060.41882	15198.11329	32147.4148	4162.132847	20288.44608	9560.495488	34462.28394	16713.30026	5990.46413	16309.02346	12558.88585	19812.4996	9662.597248	21074.96004	12713.14984	8421.569609	15622.13859	10511.00131	2521.187489	5316.408286	17133.88826	13478.52707
27 OH cholesterol	0	0	2.067631597	0	4.015261692	0	0	0	0	0	0	0	0	0	0	0	2.845534217	2.007991342	0	0	0	0	0	0	0	0	0	0	0	0	0
Cholesterol	9926.424759	9935.612682	9941.492445	9964.465748	9969.170735	9925.038258	9932.814092	9962.188521	9939.284482	9939.472674	9958.619434	9942.105868	9937.881738	9921.637082	9955.838298	9939.072674	9912.830105	9950.792732	4550.736386	9958.708882	9944.822447	9953.676584	9962.225893	9929.715147	9925.802917	9976.708614	9917.180088	9920.224515	9959.751014	9941.290486	9941.500769
MAG 16:0	3.333590726	0	0	0	0	0	0	0	0	0	0	0	0	0	0	0	0	0	0	2.036087747	2.279083136	0	0	0	0	0	0	0	0	0	0
MAG 16:1	15.97697254	10.24304748	11.58189557	2.488248202	2.230985025	9.974847926	7.196905256	0	14.56919573	4.886537001	10.86211456	9.219568326	9.094084235	2.94694618	2.675750475	2.463016829	10.79294171	3.241014419	590.25717	6.318811448	5.692078979	0	6.779218368	16.36172417	2.945046048	0	0	5.265735553	0	3.426516167	0
MAG 18:0	2.761396506	3.673807648	5.951983296	6.512239111	2.426440651	8.875598445	3.248364867	1.630093725	0	13.02240278	2.211435636	3.407625476	0	4.538151516	0	2.888578994	3.608052571	1.571684559	607.339003	9.370538556	6.858257711	7.210366558	2.043718254	0	1.522074142	0	3.5336874	13.360732	0	2.797972541	9.527823908
MAG 18:1	6.359279408	4.380067942	6.14429477	4.801401936	7.094935639	27.08606371	8.015503951	7.203876247	7.00900606	7.901455604	5.510602064	7.297475672	6.933128462	14.91639673	4.39885615	7.570340639	15.38413755	9.813369095	481.8601198	3.231451856	14.39252299	12.20800439	6.217168206	16.46137736	10.9720667	1.30536808	38.67023136	16.16122319	5.457039497	21.87397655	14.7654324
MAG 18:2	10.32151563	5.346369427	0	0.885804525	4.243198671	2.218458011	7.344717093	2.488652819	4.592619396	3.640324897	2.212657608	1.767872243	4.878342652	0	1.718403316	8.536153344	5.68392647	3.819303561	0	0	2.115190804	0	0	0	3.784689576	2.262967209	0	7.704000227	3.350235294	0	7.663218182
MAG 20:0	4.75621199	0	3.364616029	3.278698318	0.604006566	2.256221707	7.082427516	5.554992795	0	0	3.663983403	0	0	0	4.686447256	3.112184047	1.233173257	0	671.3278948	3.057311226	4.089406314	3.907421619	2.60704518	5.237726802	2.560408168	0.465133748	8.184137979	3.740228028	4.86034373	0	0
MAG 20:1	2.150340155	0	3.756732244	4.366895295	2.009021396	1.711484782	6.090211109	1.364593103	1.864069569	2.458638825	0	7.462493927	8.571906283	5.590001069	1.728050946	3.371425558	3.352164541	2.984775578	259.3913621	0	4.558184915	0	5.080210996	6.374429247	7.744838914	0	3.65668246	0	0	3.05379962	3.297246468
MAG 20:2	0	0	0	0	3.012011732	0	0	4.864821781	3.554073545	1.889233686	2.138892486	0	0	6.137098033	2.352112547	5.776952171	3.339806254	4.653813752	0	2.47099526	0	0	1.701346792	3.192079359	0	0	0	0	2.430940143	0	0
MAG 20:3	3.377858662	0	5.163419121	5.169213518	3.378028364	0	5.683365276	0	2.076566663	3.640195577	1.711118926	3.550039062	10.83955834	5.590771261	6.561561065	1.926635633	1.861273749	1.838001072	0	2.398391608	0	5.39912252	1.396927652	3.594290887	3.042680097	0.799332526	3.59627924	5.482803535	0	0	0
MAG 20:4	3.957994928	5.183770873	3.153871956	0	0	0	0	1.378534819	4.549145094	3.685995814	2.422643975	0	0	0	0	1.909502145	4.912489685	3.103874266	0	0	0	0	0	2.216954775	4.491361211	3.262642468	0	5.686879551	0	3.641301895	4.910825558
MAG 22:0	0	0	0	0	0	0	0	1.389522707	13.34266508	0	0	4.494019787	4.493144277	4.203046987	5.189775159	2.886610426	2.82084105	0	0	3.050779506	0	2.733057905	0	2.287457656	0	3.378356213	3.025697061	3.840161219	3.942806069	4.600628253	0
MAG 22:1	2.253386381	5.411848739	0	0	0	2.216267177	0	1.390835333	0	8.175819778	0	5.960641561	0	3.732642195	2.868575608	3.593885453	5.509685475	3.065535836	259.4093881	0	0	3.990338684	4.234206833	3.192052695	0	2.294317967	0	3.84476036	2.386227247	3.20452671	2.818179731
MAG 22:2	2.234723435	6.132905706	2.065127642	2.67862377	0	3.801729957	0	1.797187172	1.48130954	2.456996391	4.857289776	2.371937677	2.308795704	7.459757592	2.253072611	2.366598178	3.452857396	3.288946111	516.8805665	0	2.279082879	0	2.521204192	4.162627933	1.98526121	1.146792745	0	0	4.759748479	0	3.494991174
MAG 22:3	3.377092133	6.129844105	0	1.298400295	0	0	0	2.083744766	2.384441258	3.66257179	0	0	2.923825406	2.900222708	2.790679575	0	2.846126109	2.046465477	337.5924715	0	0	0	0	4.784855385	0	0.463311107	2.835347101	0	0	2.300423318	4.557696865
MAG 22:4	0	4.092414562	0	2.312317376	0	2.206939822	0	0	2.996594684	2.456316434	0	2.384100633	3.019315902	0	3.112873545	3.847223223	2.805976701	0	0	2.84234208	3.120340233	0	2.551211511	2.419277169	1.108859727	0.533719159	5.415695413	0	2.434478566	3.202177694	0
MAG 22:5	1.732541837	7.544287726	2.014056859	1.742409591	1.815375132	5.236555965	4.943848612	5.278791229	0	2.650837014	0	3.104751109	3.623451062	11.14023704	0	8.572634415	5.683387958	0	489.9706012	3.203336359	2.059375771	3.990996842	0	0	2.534802435	0.457282856	4.856989808	0	4.557305401	3.387950086	4.512446921
MAG 22:6	0	0	0	0	0	0	4.26121438	0	0	0	0	4.76932342	3.018957216	3.732711708	1.913383916	0	0	1.991943766	0	0	0	0	0	0	0	0	2.819798289	0	0	0	0
S-1-P	0	0	0	0	0	0	0	0	0	0	0.421082251	0	0	0	0	0	0	0	0	0	0	0	0	0	7.95268471	0	0.698641507	0.154714862	6.069861696	0	0
Sphingosine	10.98233683	6.248954178	13.24392577	0	0	9.377574832	13.31934996	1.385832897	2.295831602	0	5.368745641	2.10428312	2.413752571	5.474934535	1.912159653	2.105584507	11.03752006	5.780548801	1235.235037	3.311072716	7.734028811	6.884107353	2.641848638	0	23.55230962	6.922161576	5.52672425	14.53424645	0	7.220240926	2.951369712
