# Supplementary material for: Plasma Lipidomics Profiling to Identify the Biomarkers of Diagnosis and Radiotherapy Response for Advanced Non-Small-Cell Lung Cancer Patients
Source: J Lipids. 2024 Jan 27;2024:6730504. doi: 10.1155/2024/6730504 (PMC10838201; doi:10.1155/2024/6730504)
Supplement: Supplementary Materials — The original data for all analyses in this manuscript are provided in the supplementary document, according to the corresponding subgroups. The corresponding subgroups can be obtained according to the supplementary file name. [file 6730504.f1.zip › Lipid (Control vs. lung cancer patients after radiotherapy).txt]

Sample	1	2	3	4	5	6	7	8	9	10	11	12	13	14	15	16	17	18	19	20	21	22	23	24	25	88	89	90	91	92	93	94	95	96	97	98	99	100	101	102	103	104	105	106	107	108	109	110	111
Group	Control	Control	Control	Control	Control	Control	Control	Control	Control	Control	Control	Control	Control	Control	Control	Control	Control	Control	Control	Control	Control	Control	Control	Control	Control	post-RT	post-RT	post-RT	post-RT	post-RT	post-RT	post-RT	post-RT	post-RT	post-RT	post-RT	post-RT	post-RT	post-RT	post-RT	post-RT	post-RT	post-RT	post-RT	post-RT	post-RT	post-RT	post-RT	post-RT
FFA(14:0)	26226.31883	80393.75253	0	9602.152861	28087.01512	15353.41957	180623.001	196940.5579	408325.3525	11160.65526	146976.3839	153794.8388	432185.5674	168788.1311	167446.9361	754414.846	535360.908	647650.5685	584684.5477	589587.1792	608639.3145	585732.8467	614848.3952	632612.4001	606199.8314	595946.5958	799922.0098	1832732.065	279640.073	1128901.702	960814.3752	354360.1945	773078.764	1003379.213	499152.4513	974904.6414	588002.783	883801.0207	992552.9066	860496.7804	977033.1473	1749475.611	2214568.412	0	531092.1051	195507.2554	211661.9699	596165.1465	727322.4857
FFA(14:1)	1350784.043	934898.0891	1446898.169	1028215.637	702446.9749	1411917.572	1120809.525	1143673.096	913902.0918	1654532.747	1271510.884	760046.8399	896820.369	819793.2245	1088553.384	1007090.566	634691.0304	1146818.172	563021.4893	614788.012	935532.4633	644556.0589	733623.3161	697558.553	421259.1064	1094704.097	334924.258	908028.8736	700042.979	658599.4129	535618.7917	705151.7776	511970.0412	835892.5059	575133.0902	633843.6382	745366.0168	567230.6261	764805.1373	475881.3601	1109414.245	842697.0886	852857.8649	0	924169.5561	740740.8646	345630.8977	528089.5286	403704.3004
FFA(16:0)	3416688.562	6602063.872	4007995.141	3151821.419	7028577.537	2752007.512	5938757.847	3699754.116	10754797.84	3140045.988	5309540.935	9107977.696	10875851.05	6968026.556	3135026.935	6196127.279	4181207.331	9224731.477	3984811.166	5632357.372	2975541.217	2861268.271	4149388.998	7298027.377	3527109.234	9760565.815	18350000.88	15713334.42	3263904.108	14097203.13	17650488.47	5455683.725	5909197.872	17563255.21	11507360.48	3976837.357	5188461.216	7081226.142	7194479.11	2434845.563	27606755.92	19271944.94	20843258.46	0	9458884.121	4467952.07	6459643.577	10929759.19	8800190.604
FFA(16:1)	369966.7538	701699.1795	417272.3645	321422.9805	585186.4115	319475.7873	950290.8018	349711.6715	2091540.468	413828.6398	551564.8417	1614598.729	1627677.414	843856.7259	419767.4669	274021.6945	373878.4218	360829.6314	105860.4405	176934.0265	72282.53438	42173.49778	133777.6171	650050.225	59219.97547	824612.2092	1897199.985	2618311.947	204522.7068	1024454.285	1336917.171	533968.2756	1367731.913	2148245.775	1803287.831	110844.1254	147099.9839	755509.9842	597395.2092	149373.4151	5971841.754	2949344.597	2295049.672	0	1560205.335	226035.3994	497652.604	1864376.839	1795583.142
FFA(16:2)	294974.8977	294659.2343	253632.4453	287294.8688	305714.1567	293591.4081	256653.9928	264923.5369	276358.9053	335896.8689	280467.3173	257474.4721	278288.2878	298954.2513	282172.674	258898.1168	158587.9074	305429.2183	343559.9258	257181.9982	322068.3561	322200.4198	320514.3311	328870.0714	309842.6189	353192.5079	275319.965	318746.8771	158704.2921	313228.0653	91168.04808	199711.2248	355651.2217	207102.4722	309118.2871	356711.4855	168808.5484	297787.7301	320449.7134	205799.2584	305237.1876	247436.1075	393919.7765	0	410102.1567	290696.3197	448495.3929	224282.8879	252652.8842
FFA(18:0)	4601318.08	8212052.267	5802695.115	4475891.333	8816125.637	4087444.29	7390552.901	6506423.4	11936995.49	4232152.732	8438703.904	10421838.01	11224726.61	9696887.896	6602319.412	9632039.685	8104545.287	12003034.57	5512455.109	7404834.692	5059361.467	5857773.39	5461668.777	8196240.154	7480563.688	8508309.254	14810174.47	9291999.728	4436605.626	11466408.88	9005827.021	7313838.54	7598431.7	8760158.212	12916760.66	2721604.48	7515761.532	10579859.66	5462561.815	3994620.526	14950628.71	8633694.547	9223929.708	0	7432202.195	6390949.927	7905887.123	7998003.651	4983515.43
FFA(18:1)	11452711.7	33860047.15	20655290.42	13207490.09	31281531.85	9386931.312	37418414.25	18866572.22	63551291.38	11520421.48	29225300.7	49804379.23	55061067.43	35447667.94	7848356.096	24152109.34	15898990.45	19768057.42	5768952.534	11715509.28	8283740.93	6616725.164	7034023.136	14448154.13	5893788.499	28181619.28	50742382.08	31631646.72	6929136.918	35740391.5	41836731.94	14292711.73	19954127.96	36198613.05	35873167.65	5659501.808	8943245.126	28826323.54	22138819.08	4375036.066	80592365.7	29064890.67	26293838.52	0	23113003.84	8648024.612	17548067.49	31828253.21	23181955.08
FFA(18:2)	7331924.117	17331817.86	8099924.253	4968593.072	12644382.72	5015656.419	16807129.83	7494480.715	30014904.86	7725626.064	15356407.27	27700922.53	31441075.89	21534512.49	3615306.975	13843661.27	9098157.702	10200028.11	5076521.63	8231028.37	4599952.028	3590833.925	4106303.294	12918043.91	5002052.381	17331095.38	32272802.62	16193625.43	3516451.328	22432287.59	21827249.06	7584885.717	9482319.078	22449520.14	20672426.68	4210642.106	8324277.413	14067929.3	10296794.85	3415465.952	64472745.3	17832252.07	15710833.3	0	12222849.73	4974593.222	11701148.07	18471031.49	14455597.9
FFA(18:3)	200392.8598	784130.1162	218019.4049	305774.707	502085.0457	154401.0551	950175.9063	192657.7691	2025777.359	289726.9213	709714.6413	1443237.045	1643759.462	1127827.791	162918.8144	475593.5636	365229.1554	1293051.356	249396.8124	284609.4735	773028.45	599522.3203	210086.3529	478418.5702	264778.5555	850750.6074	1226116.676	986810.4151	271961.4699	1555187.099	1051755.624	486902.022	582461.0227	1254751.021	1705288.082	268566.0856	558181.1426	528846.7534	445720.472	123901.1555	2902333.603	1412248.482	953053.4252	0	766306.6422	269778.2645	921373.3549	761063.7234	862604.0044
FFA(20:0)	2381732.042	1298149.415	2197977.646	1275730.793	3099860.405	1335567.871	812795.3855	1074665.973	1803200.9	828850.03	1519165.824	1543488.472	1071780.825	1556566.962	1152320.372	986808.5566	1178911.657	1960246.506	1363730.744	1014175.095	705962.2473	871458.9617	1631242.21	937682.309	1443681.757	976926.6607	3133730.241	3482030.473	2300633.607	2217816.196	1918227.301	3223948.69	2428434.062	2545933.119	2563881.115	930744.0527	3153918.155	2115806.03	1973966.918	2103444.449	2423934.659	1104642.234	934503.3445	0	536346.3026	937190.8824	368350.4227	5849225.96	1131674.799
FFA(20:1)	386712.8145	1712327.477	1167788.508	712965.034	1458480.115	428917.9668	1738898.01	947907.3464	6811843.59	592797.0293	1090544.854	1848327.334	2464894.974	1074224.84	597995.3821	1089580.223	614989.3223	720064.0676	103144.149	217979.3369	217249.0138	199888.0061	140460.2018	211800.469	114160.745	1136651.584	1114086.087	878264.8291	149734.0486	741111.4313	1075856.782	271983.4266	318351.1265	543160.7368	918691.0782	320364.1927	246454.5017	1634312.173	382237.8198	277413.1789	3369954.844	559946.8731	463577.8201	0	365378.9808	136578.5854	279034.6499	557332.5013	371177.0957
FFA(20:2)	304859.8471	724787.981	495569.4976	375890.8381	859126.6041	255100.2691	840216.6306	465137.4805	1564329.864	463599.5465	902289.193	1230811.759	1370146.764	755148.8459	249996.3547	404046.5268	454852.3889	413761.9488	95129.12342	149644.3495	86372.62316	55523.47871	122052.7511	323349.8025	117089.2489	675874.1089	889162.4958	466669.7918	155287.1483	537442.0947	727633.5448	270998.666	405370.5142	556822.2864	778337.6858	82762.33302	252275.1986	428397.2193	272484.5439	105726.1013	2469882.556	365896.3887	399669.3981	0	340385.2577	158487.5095	323174.3751	516563.4044	375890.377
FFA(20:3)	506903.7799	702937.1607	1054466.508	1181136.955	1582762.139	1041243.542	855990.0234	1299459.479	2212970.248	779324.9736	1609984.358	1594397.406	1741483.998	1320789.406	485213.2945	537836.5169	1129350.148	357064.8982	210121.1641	175037.2492	478920.7753	359383.5255	201757.2034	298662.2445	288044.0441	1685287.491	662188.3944	362220.5374	539124.3593	321420.6349	485543.8106	584759.0662	517917.5332	590448.1574	597669.4338	462588.5956	755298.0496	636666.4829	471873.5626	420277.7562	2687740.856	396351.8303	375844.1259	0	491167.5027	645138.0399	723887.0701	433209.8501	426190.3129
FFA(20:4)	743147.8533	1111321.567	1151247.648	1353789.655	1820492.69	968303.2411	1808616.283	1784918.225	2724515.224	1426097.028	1842660.424	1857757.119	2367151.836	1608928.31	599944.2034	952002.0221	1547775.769	764989.8408	587333.2822	457944.7449	397791.2691	326742.4146	728346.4295	420640.1007	570932.3983	2719777.05	1159634.451	954442.9079	233565.3389	817592.7493	1101707.435	243119.1266	1417885.744	1787022.196	944235.2156	350713.8782	518544.7999	968270.4391	553762.7464	266152.2887	4022545.541	971502.2386	1316612.619	0	860814.1629	396445.076	901256.8589	1040179.293	1043269.238
FFA(20:5)	314716.5673	338984.0608	1987002.536	438492.447	428469.5574	3367276.878	477546.9167	281768.1375	483703.2393	335377.0528	1514338.515	514512.5372	392080.2754	626659.2475	378634.0839	663376.009	447404.1525	213088.7144	284132.7951	167093.8511	187289.1256	181941.6941	277999.2083	267626.3969	301023.5174	169628.3325	500411.0071	322711.0974	318526.6993	254453.6712	163404.5909	265705.8442	496756.2677	221879.7226	567085.0644	313255.953	614918.0672	586261.2334	198287.2031	292927.7868	216788.8256	202333.6238	131869.9085	0	380279.7177	486143.6354	235843.4073	319237.7897	284396.1064
FFA(22:4)	413644.4063	863880.5913	804008.7042	749518.9887	1397136.411	509371.6692	932336.4518	825482.8117	1809650.243	806583.7008	1094222.888	1267127.585	1170487.075	909876.0095	269545.7021	458610.1571	723504.9772	179105.2332	57084.67092	95492.75	48101.87136	31017.4815	86067.35101	162507.6397	61650.94457	1244966.683	691361.7201	358388.2778	153779.685	478473.1796	528357.8951	197465.338	441145.767	595150.9549	536358.329	83828.99631	230187.618	390614.6282	232523.8051	90846.36735	2730071.736	260184.2227	265886.5065	0	218955.4338	94271.51695	222311.051	418883.5695	328527.2808
FFA(22:5)	206562.9547	647120.3003	459595.7061	599616.7829	1117273.782	231476.9886	725098.7371	602919.8531	1697950.855	691566.1838	922808.0131	870013.8759	1502648.554	645741.9849	198997.1003	382684.2178	590533.0323	194299.9651	74359.36593	92655.03657	62339.92132	29489.45121	80711.17528	80152.41715	59743.44719	1002171.326	600437.598	355836.8705	51466.16512	388168.2445	442207.0282	157958.3166	388150.5772	672103.0173	493624.0495	123241.6827	167586.8246	260628.2284	213634.3326	91298.25156	3050917.292	269608.2856	218126.9055	0	313476.5758	95438.75901	228614.8748	268643.9269	266332.6842
FFA(22:6)	88888.48383	391686.0187	275810.6558	290404.9794	561186.774	139101.5052	313692.8751	305603.8329	690392.7365	236314.2918	247577.1288	288012.988	886066.555	274163.233	109536.2355	235933.0706	242046.4984	177808.8355	132966.0994	220314.4035	66462.27887	51409.22508	115078.2893	105416.9847	126583.7189	687081.1375	532527.3686	504443.746	75633.64065	283312.5182	321031.7928	274625.3545	344995.7256	602860.3025	546100.3184	27259.64055	183288.6738	240949.2991	321446.2207	20675.4155	1327716.255	250419.2557	256595.8614	0	498945.2847	132783.7475	324298.7198	220495.5391	236065.4124
FFA(24:0)	16516325.13	33070915.39	35244747.2	32907011.42	37838147.48	16387406.88	33692025.29	38425556.47	30775161.71	25862392.28	25123953.16	37075735.97	34971184.5	15466427.55	22559432.53	19926882.99	44321954.8	9894201.142	24531099.61	30581455.32	15694300.11	29980655.06	6634796.05	27397259.62	24991372.06	15901240.94	5275749.753	15137050.22	3046241.502	9041591.156	331945.4159	997749.0283	4971323.098	6979997.34	1701939.814	17086436.08	3095132.662	9547286.384	3062811.333	1543686.092	1262394.636	1734759.052	13180090.71	0	1687376.553	613871.0888	17282071	26213702.89	1829269.235
FFA(24:1)	646715.2515	1279560.984	1042848.606	1016138.112	1396454.898	559428.6182	922717.6683	832845.5196	2469251.298	600724.8539	643728.0716	830355.2051	1116844.295	740921.68	609839.2926	836844.5149	499890.906	371813.0113	70874.38341	97033.56844	191654.6066	167151.9245	59262.99396	96720.59425	52431.48174	1132531.284	435448.5981	393639.8126	532581.203	562019.0158	274604.7459	300252.392	221932.2935	165105.5591	579603.5961	152692.8018	401349.9811	1239998.147	199537.4406	115951.1137	1476302.081	120007.4803	94317.66881	0	151771.7739	49940.18118	166796.5712	239677.965	201447.5829
LPA(14:0)	0	0	0	0	0	0	0	0	0	0	0	0	0	0	0	0	0	0	0	0	0	0	0	0	0	0	0	0	0	0	0	0	0	0	0	0	0	0	0	0	0	0	0	0	0	0	0	0	0
LPA(16:0)	1733.218118	858.7181005	1729.18827	953.0798267	645.9582802	1734.275139	1183.611152	1030.503111	0	0	1729.48321	1612.130681	0	1343.385258	880.0710148	1388.195881	767.322098	0	0	0	364.343592	0	621.6281967	630.6429219	0	4445.065491	0	2886.831953	2624.297796	2184.271828	1494.985955	2989.470928	0	3427.067676	2365.500782	1176.333705	3078.65329	1628.424293	1357.203424	0	2536.557804	1499.217098	2148.903502	966.9356484	0	1603.403903	0	0	1332.70405
LPA(16:1)	0	0	0	0	0	0	0	0	0	0	0	0	0	0	0	0	0	0	0	0	0	0	0	0	0	0	0	0	0	0	0	0	0	0	0	0	0	0	0	0	0	0	0	0	0	0	0	0	0
LPA(18:0)	812.3409696	0	623.8557334	719.3392558	0	1327.67727	626.4828987	356.674953	901.7624815	0	0	895.9924304	0	988.5480965	0	721.9784471	879.3756169	514.5919884	0	0	0	0	0	0	0	0	0	1234.419791	0	618.5256517	0	0	0	822.4622655	519.4497988	0	0	0	925.7632247	408.6935508	0	0	1190.586849	0	682.2617657	481.1826988	0	0	0
LPA(18:1)	0	0	0	408.1053488	0	619.29	515.97	0	0	0	0	0	0	0	0	0	0	0	0	0	0	0	0	0	0	0	0	923.922105	0	0	0	0	0	608.6228891	0	0	0	0	518.2368869	0	638.421802	364.956887	0	0	0	0	0	0	618.3680267
LPA(18:2)	567	0	0	0	0	0	0	0	0	380.8556645	0	0	0	0	0	0	0	0	0	0	0	0	0	595.6155	0	0	0	0	495.4181133	0	0	992.0513724	0	0	0	0	0	0	0	0	0	0	0	0	0	373.4883076	0	0	0
LPA(18:3)	0	0	0	0	0	0	0	0	415.7601132	0	0	0	0	0	0	0	0	0	0	0	0	0	0	0	0	0	0	0	0	0	0	519.1821678	0	0	0	0	0	0	0	0	0	0	0	0	0	0	0	0	0
LPA(20:0)	0	0	0	0	0	413.1748091	0	0	0	0	0	0	0	0	0	0	0	0	0	0	0	0	0	0	0	0	0	0	0	313.5795	0	0	0	0	0	0	0	0	0	0	0	0	0	0	0	0	0	0	0
LPA(20:1)	0	0	0	0	0	0	0	0	0	0	0	0	0	0	0	0	0	0	0	0	0	0	0	0	0	0	0	0	0	0	0	0	0	0	0	0	0	0	0	0	0	0	0	0	0	0	0	0	0
LPA(20:2)	0	0	0	0	0	0	0	0	0	0	0	0	0	488.0894793	0	0	0	0	314.2769507	0	0	0	0	0	0	0	0	0	0	0	0	313.5878789	0	0	0	0	0	0	0	0	0	0	0	0	0	0	0	0	0
LPA(20:3)	0	0	0	0	0	0	0	0	0	0	0	0	0	0	0	0	0	0	0	351.308	0	0	0	0	0	0	0	0	0	0	0	0	0	0	0	0	0	0	0	0	0	0	0	0	0	0	0	0	0
LPA(20:4)	0	0	0	0	1023.327861	0	0	0	0	0	0	0	509.8175241	0	0	0	0	0	616.4991398	0	0	0	0	0	0	0	414.5283621	0	0	0	0	0	410.4578205	0	0	405.0230564	405.3089517	519.1471845	0	0	0	0	0	0	0	515.859662	0	0	0
LPA(20:5)	0	0	0	412.637243	417.69	0	0	0	0	0	0	0	0	0	0	0	0	0	0	0	0	0	0	0	313.6806319	0	0	0	0	0	0	0	0	0	0	0	0	0	0	0	0	0	0	0	0	0	0	0	0
LPG(14:0)	0	321.1884531	0	549.8913019	0	0	325.4622865	0	0	0	0	0	0	341.9435106	351.2320376	0	323.5985135	505.215876	0	0	0	0	0	0	0	0	355.5431269	501.2349221	0	0	378.0196918	0	371.4584515	352.4176891	0	0	376.2654458	0	0	0	335.7735296	349.8805006	475.7264557	179.6625078	0	0	538.8884412	0	621.125714
LPG(16:0)	1357.430086	858.7807056	1941.123863	1663.109092	1537.666136	594.0047386	302.1326273	3563.245226	1205.251337	2642.728243	720.4364254	1063.780154	760.0294376	1975.206482	2941.883058	4337.974444	2230.935496	4636.037751	1038.519416	2783.750271	1060.089341	1351.625685	2095.543718	1556.860169	951.9114768	1031.374205	1470.128682	1517.676093	2807.622051	1063.967077	3190.493473	1662.261678	3066.471463	2022.548036	3483.834186	1836.800515	2189.67826	721.0632989	1842.160395	843.1908013	1634.874944	3144.107908	2350.868026	5518.429697	4139.434185	1668.56551	1149.875314	2370.658849	673.6134369
LPG(16:1)	441.5721843	364.7940199	233.6449049	269.5071187	304.3454077	312.7990103	423.3528774	0	709.7042427	635.6716582	624.4717438	816.1704993	737.1017269	643.9162882	1056.16694	189.3907085	330.2759043	320.7517827	209.6799452	549.25015	0	327.5318384	322.590514	602.5004106	314.6008494	0	272.7698263	391.8451236	278.8871631	424.5955937	1057.780776	628.250487	302.1589463	875.8155833	247.3571283	237.8952813	363.3525974	337.6645034	796.4460257	559.3391574	280.3249682	427.8885914	261.2279585	591.9512435	994.1080215	282.7280512	167.8238437	311.6979177	258.9781151
LPG(18:0)	3118.475517	1886.176684	6530.686989	5249.55217	4257.27446	1362.616024	323.4619471	371.3396645	958.1134889	3292.931614	1581.873684	2150.38193	2613.967999	544.6491946	2462.4859	2020.192556	2988.463356	6062.314643	4413.811561	3853.249184	3226.367732	1622.135568	4133.311983	2924.305041	2092.593972	2791.273265	3881.793114	5346.641508	4895.792599	4290.05328	9608.725024	4734.305703	3953.706228	4547.432325	4214.003669	7821.648948	7021.268708	4502.684234	3307.692353	3556.253546	2403.875294	2580.608597	3015.097591	2162.464979	6103.483051	2229.813597	2883.25508	1613.706961	3444.027452
LPG(18:1)	11460.33742	6490.128184	13644.21804	9404.787421	15653.77905	3894.947297	9763.086264	17750.26502	7788.550005	11882.52095	9027.762856	6578.263031	10799.64318	11299.85621	5487.236753	11433.81864	8267.133002	19302.72286	14995.12137	5241.52987	16721.38301	10083.04695	10130.3434	6145.459662	4676.816911	12316.24483	20366.53092	16410.46309	14693.06363	15961.28135	34354.15507	9498.329314	25204.35317	28492.11211	20439.88373	24136.0616	17302.97034	10128.4778	13688.04529	15305.29294	25958.92457	16320.10571	7806.191891	23608.64699	21921.62727	11789.11618	7715.63725	8480.630805	11227.52382
LPG(18:2)	11759.10636	5352.19416	4930.978083	5462.567286	6623.169436	2911.491461	2871.670974	8667.748414	5531.349945	8912.318905	3697.547404	8802.208762	6865.942221	7781.844805	10523.1942	2576.182408	9515.789806	8640.302626	7916.888052	7794.70758	3382.343445	8915.491282	5463.0119	6471.787003	6240.790376	5637.700969	11310.10886	10581.20896	5066.247815	9475.736783	4103.511351	4554.23377	11508.75662	9671.74927	10170.33145	10311.06888	18043.56362	3298.77871	8847.233018	6951.681525	4884.999778	5883.644395	2336.969084	7789.54042	9574.467948	8279.585863	2380.603877	4893.627976	6336.299971
LPG(18:3)	0	467.2832736	0	843.8183232	0	0	804.8500961	0	0	0	1680.383527	0	571.3495468	472.8858671	1280.481138	0	0	0	732.8016452	318.4066461	1631.69767	0	221.9063338	0	352.0756983	801.1554739	249.4164912	1075.240643	1027.691556	646.0805555	238.5864035	546.1494094	861.9399935	489.2863446	2276.410317	1683.893817	1826.843022	485.4639752	430.4501607	409.7125589	637.2243612	559.891598	828.9951832	1682.542037	505.3256162	247.7534628	339.3509724	198.6352482	440.9834062
LPG(20:0)	298.1627687	186.8857053	0	396.2612079	0	188.039967	416.2210233	652.5834027	0	252.1374823	0	571.0210716	223.5848371	336.6358883	0	318.6599815	0	261.9658938	268.0254395	527.8361713	526.2271262	0	259.2880103	186.6126071	583.9384338	0	0	283.1624127	706.7034162	0	0	0	286.1445727	276.4567122	500.1688421	414.8802468	0	0	171.1230398	285.1664876	0	0	307.3885883	382.051788	0	0	0	0	0
LPG(20:1)	0	0	0	0	1048.517017	0	1035.483467	0	0	1053.964073	1048.708759	0	0	1044.385341	1541.865541	0	0	0	0	0	0	0	0	0	0	0	0	0	0	0	0	0	0	1043.906255	0	0	0	0	983.2675592	0	0	0	0	1214.160132	1047.539612	0	0	0	0
LPG(20:2)	632.8557808	0	932.4721032	938.767112	569.238739	0	0	251.9951826	452.9749911	930.9020174	400.8562946	0	321.3764687	770.4657077	1375.119431	0	631.1026876	666.5181494	638.5448657	317.4223041	1201.899515	1167.856217	0	373.961942	737.3833419	1575.182365	860.2697924	1122.949482	590.4118902	939.947037	1057.745036	0	0	1404.270105	1801.828843	1206.29178	1434.397192	1278.668617	910.8251862	1273.542997	845.9723811	0	2184.884019	1307.134081	937.6893851	606.4193122	1237.154126	533.8525366	548.5777536
LPG(20:3)	0	0	1879.268516	532.8244529	0	0	0	0	0	0	0	629.7418584	0	1305.689866	0	0	514.6880419	338.9358723	384.5713855	440.355842	437.9957939	0	0	0	244.1315375	505.9806914	366.8410145	835.4344636	282.4826337	844.6500961	508.2525383	0	973.9891433	245.9429002	594.340261	810.9383602	763.4683892	0	791.9640738	0	625.8953736	268.5212019	291.546461	0	1107.190721	0	389.7460777	423.9676687	1253.872179
LPG(20:4)	0	370.9683887	373.7045553	0	829.6683303	740.3524454	0	662.9497953	550.8875019	382.18371	314.1943831	345.1168889	0	193.1387038	0	215.5063896	189.9813327	287.4425012	357.8285867	601.8896573	0	288.0678441	0	0	736.6099279	513.3991934	611.537038	365.8114215	453.9143147	675.6236462	774.244489	0	609.4478422	1100.108338	1113.920679	826.2025499	627.8665199	713.2215847	1365.631947	320.6003931	354.6000639	450.8271552	782.567232	1558.597054	373.3936614	270.6713742	0	261.7035696	0
LPG(20:5)	187.0356382	299.2349974	449.8615685	533.9204044	275.6445924	427.9128977	398.4123555	845.9992966	124.6306072	269.4338947	216.807131	278.5329621	592.3463939	1203.380583	599.6952888	417.197814	528.4904905	470.8086768	208.5814173	468.9788003	0	452.2998758	190.907813	313.7647236	425.0453604	0	0	320.407622	490.9134501	805.2282497	634.0106911	571.4524172	658.5345042	0	481.8755806	329.333832	591.3200117	642.721316	435.3787761	713.2799188	622.4886979	692.4439228	0	981.0337509	391.6014332	152.9001686	254.4115217	149.0422885	0
LPG(22:4)	447.3316179	343.4598281	585.246727	291.4733691	293.4146376	989.7481739	304.9472343	310.0092807	290.9436949	527.8358738	1022.23229	843.414619	865.400215	124.4913487	280.6163528	277.4124832	470.0210459	525.3654596	329.7686287	218.7902391	0	213.0981065	436.9501656	333.4839938	563.5250841	918.4372512	0	532.5020209	580.6272795	472.5643249	0	222.5000302	406.4704757	748.2461468	320.2738422	383.3872182	620.8093658	547.1264717	872.9329774	211.5448531	456.449808	1364.613929	284.6242086	928.9182998	1199.717094	225.6354232	0	0	469.6063656
LPG(22:5)	258.7574303	517.0238979	1230.609616	959.9852631	631.9571619	134.5833424	133.6761739	558.8154193	464.8964659	920.526418	597.7152394	859.0382005	567.5010311	571.0540226	942.3819324	448.4966287	304.1556649	384.4222142	532.2735407	0	533.598187	296.6034666	366.6000956	663.6543694	488.3718065	285.5792261	0	709.3656685	1331.529964	368.0999959	1294.47663	0	801.5450858	911.4132431	752.2510853	664.829931	1650.388364	522.8336846	620.7270756	669.3847401	378.1668308	553.4169061	288.4840104	0	0	376.7344784	431.8450949	0	0
LPG(22:6)	288.6725817	242.7236793	266.9442295	495.2309749	300.9315963	293.8769064	131.9943839	163.4512154	132.8214068	302.721185	223.7996385	300.7461391	0	205.4301632	449.6208201	131.2352303	554.9154145	519.7076255	357.3517905	0	0	0	0	0	600.4259256	584.6850452	0	0	582.6507276	512.8731467	775.6149044	622.6765531	637.1857019	380.3789931	2192.238391	0	595.6567452	0	647.0384836	515.5999839	606.3908515	350.9216861	0	468.2545972	371.1653455	583.6449222	273.02081	516.3992925	0
LPI(14:0)	0	0	0	0	0	0	0	0	0	0	0	0	0	0	0	0	0	0	0	0	0	0	0	0	0	0	0	0	0	0	0	0	0	0	0	0	0	0	0	0	0	0	0	0	0	0	0	0	0
LPI(16:0)	0	0	0	0	0	0	0	0	0	0	0	0	0	0	0	0	0	0	0	0	0	0	0	0	0	0	0	0	0	0	0	0	0	0	0	0	0	0	0	0	0	730.1783446	884.2537106	1565.926089	0	0	0	0	0
LPI(16:1)	0	0	0	0	0	0	0	0	0	0	0	0	0	0	0	0	0	0	0	0	0	0	0	0	0	0	0	0	0	0	0	0	0	0	0	0	0	0	0	0	0	0	0	0	0	0	0	0	0
LPI(18:0)	0	0	0	0	0	0	0	0	0	0	0	0	0	0	0	0	0	0	0	0	0	0	0	0	0	702.7269086	0	0	0	0	0	0	0	0	0	0	0	0	0	0	0	0	0	0	0	0	0	0	0
LPI(18:1)	0	0	0	0	0	0	0	0	0	0	0	0	0	0	0	0	0	0	0	0	0	0	0	337.4027039	0	0	0	0	0	0	499.7782283	0	0	0	0	0	0	0	0	0	0	683.4546378	1028.877307	363.9792434	0	0	0	0	0
LPI(18:2)	0	0	0	0	0	0	0	0	0	0	0	0	0	0	0	0	0	0	0	0	0	0	0	0	0	0	0	0	0	0	0	0	0	0	0	0	0	0	0	0	0	0	706.9645423	0	0	0	0	0	0
LPI(18:3)	0	0	0	0	0	0	0	0	0	0	0	0	0	0	0	0	0	0	0	0	0	0	0	0	0	0	0	0	0	0	0	0	0	0	0	0	0	0	0	0	0	0	0	0	0	0	0	0	0
LPI(20:0)	0	0	0	0	503.5846749	0	0	0	0	0	0	0	0	0	0	0	0	0	0	0	0	0	0	0	0	0	0	0	0	0	0	0	0	0	0	0	0	0	409.1944214	0	0	0	0	0	0	509.4713517	0	0	0
LPI(20:1)	0	0	0	0	0	0	0	0	0	0	0	0	0	0	0	0	0	0	0	0	0	0	0	0	0	0	0	0	0	0	0	0	0	0	0	0	405.1539801	0	0	0	0	0	0	0	0	0	508.8251093	0	0
LPI(20:2)	0	0	0	0	0	0	0	0	0	0	0	0	0	0	0	0	0	0	0	0	0	0	0	0	0	0	0	0	0	0	0	0	0	0	0	0	0	0	0	0	0	0	0	0	0	0	0	0	0
LPI(20:3)	0	0	0	0	0	0	497.7	0	0	0	0	0	0	0	0	0	0	0	0	0	0	0	0	0	0	0	0	0	0	0	0	0	0	0	0	0	0	0	0	0	392.3600142	0	0	0	0	0	0	0	0
LPI(20:4)	0	0	0	0	0	0	0	0	0	0	0	0	0	0	0	0	0	0	0	0	0	0	0	0	0	0	0	0	0	0	0	0	0	0	0	0	0	0	0	0	0	0	0	0	0	0	0	0	0
LPI(20:5)	0	0	0	0	0	0	0	0	0	0	0	0	0	0	0	0	0	0	0	0	0	0	0	0	0	574.5707202	0	0	0	0	0	0	0	0	0	0	0	0	0	0	0	0	0	0	0	0	0	0	0
LPI(22:4)	0	0	0	0	0	0	0	0	0	0	0	0	0	0	0	0	0	0	0	0	0	0	0	0	0	0	0	0	0	0	0	0	0	0	0	0	0	0	0	0	0	0	0	588.5513221	0	0	0	0	0
LPI(22:5)	0	0	0	0	0	0	0	0	0	0	0	0	0	0	0	0	0	0	0	0	0	0	0	0	0	0	0	0	0	0	0	0	0	0	0	0	0	0	0	0	0	0	0	0	0	0	0	0	0
LPI(22:6)	0	0	0	0	0	0	0	0	0	0	0	0	0	0	0	0	0	0	0	0	0	0	0	0	528.8457178	0	0	0	0	0	0	0	0	0	0	0	0	0	0	0	0	0	0	0	0	0	0	0	0
LPS(14:0)	0	0	0	0	0	0	0	0	0	0	0	0	0	0	0	0	0	378.4224696	0	0	0	0	0	0	0	0	0	0	0	0	0	0	0	0	0	0	0	0	0	0	394.8201352	0	0	707.3798753	472.8893372	0	0	0	0
LPS(16:0)	0	1085.149351	1385.048098	790.8477735	692.2915903	941.7808167	1227.539279	1647.739308	1286.592927	0	1186.708483	1143.103781	790.6391187	1483.176295	926.8538274	888.0580553	1368.974196	0	0	0	0	790.4069337	439.0562015	0	0	3028.291119	965.7712875	1705.361574	2640.381727	2462.690446	2104.933064	3490.051495	0	2796.540646	2920.977481	790.4292148	2227.243361	1046.614898	2205.783433	1099.915282	2572.462986	2728.911694	1756.306533	1044.019826	1421.605305	1311.779399	0	0	0
LPS(16:1)	0	0	0	0	0	0	0	0	0	0	0	0	0	0	0	0	0	0	0	0	0	0	0	0	0	0	0	0	0	0	0	0	0	0	0	0	0	0	0	0	0	0	0	0	0	0	0	0	0
LPS(18:0)	0	0	0	0	0	0	0	0	0	0	0	0	0	0	608.5318932	816.0596173	0	0	0	0	0	0	0	0	0	586.36074	0	1247.015468	0	0	1039.036175	0	0	0	433.3213284	519.4173885	1044.559808	314.2749489	0	0	972.0802274	930.404091	586.6862523	497.7160964	0	927.2975567	0	0	0
LPS(18:1)	0	0	0	0	0	0	0	0	0	0	0	610.3666211	0	0	0	0	509.1430151	0	0	0	0	0	0	0	404.6343839	0	0	0	0	0	912.7166254	404.5157552	0	0	0	0	0	0	0	0	0	0	0	370.6414516	0	0	0	0	0
LPS(18:2)	649.5257186	367.2683184	0	0	0	548.2253805	0	0	0	0	0	0	0	556.8201622	0	0	0	0	0	0	0	0	0	0	0	0	0	0	0	0	549.2341875	1645.032511	0	915.5349571	0	0	1190.486599	0	0	0	1533.081025	0	1147.214813	0	0	0	0	0	0
LPS(18:3)	0	0	0	0	0	0	0	0	0	0	0	0	0	0	0	0	0	0	0	0	0	0	0	0	0	0	0	0	0	0	0	0	0	0	0	361.8625507	0	0	458.3084994	0	0	0	479.8555735	0	0	0	0	0	0
LPS(20:0)	0	0	0	0	0	0	0	0	0	0	0	0	0	0	0	0	0	0	0	0	0	0	0	0	0	0	0	0	0	0	0	0	0	0	0	0	0	0	0	0	0	0	0	0	0	0	0	0	0
LPS(20:1)	0	0	0	0	0	0	0	0	0	0	0	0	0	0	0	0	0	0	0	0	0	0	0	0	0	0	0	0	0	0	0	0	0	0	0	0	0	0	0	0	0	0	0	0	0	0	0	0	0
LPS(20:2)	0	0	0	0	0	0	0	0	0	0	0	0	0	0	0	0	0	0	0	0	0	0	0	0	0	0	0	0	0	0	0	0	0	0	0	0	0	0	0	0	0	0	0	0	0	0	0	0	0
LPS(20:3)	0	0	0	0	0	0	0	0	0	0	0	0	0	0	0	0	0	0	0	0	0	0	0	0	0	0	0	0	0	0	0	0	0	0	0	0	0	0	0	0	0	0	0	0	0	0	0	0	0
LPS(20:4)	0	0	0	0	0	0	0	0	0	0	0	0	0	0	0	0	0	0	0	0	0	0	0	0	0	0	0	0	0	0	0	0	0	0	0	0	460.7010204	0	0	0	0	0	0	0	0	0	0	0	0
LPS(20:5)	0	0	0	0	0	0	0	0	0	0	0	0	0	0	0	0	0	0	0	0	0	0	0	0	0	0	0	0	0	0	0	0	0	0	314.8581128	0	0	0	0	0	0	0	0	305.1966127	0	403.139014	0	0	0
LPS(22:4)	0	0	0	0	0	0	0	0	0	0	0	0	0	0	0	0	0	0	0	0	0	0	0	0	0	0	0	0	0	0	0	0	314.198	0	0	0	0	0	0	0	0	0	0	0	0	0	0	0	0
LPS(22:5)	0	0	0	0	0	0	0	0	0	0	0	0	0	0	0	0	0	0	0	0	0	0	0	311.724	0	0	0	0	0	0	0	0	0	0	0	0	0	0	0	0	0	0	0	0	0	0	0	0	0
LPS(22:6)	0	0	0	0	0	0	0	0	0	0	0	0	0	0	0	0	0	0	0	0	0	0	0	0	0	0	0	0	0	0	0	0	0	0	0	0	0	0	0	0	0	0	0	420.6669551	0	0	0	522.1231069	0
PA(14:0/14:0)	0	0	0	1026.04327	0	0	0	0	0	1046.927123	0	0	0	1010.00256	0	0	1004.459686	0	0	0	0	0	0	0	0	0	0	1526.441278	0	0	0	0	0	0	0	0	0	0	0	1010.168657	0	0	0	1615.733015	0	0	0	0	0
PA(14:0/18:1)	0	1497.485902	0	0	0	0	0	0	0	0	0	0	0	0	0	0	0	0	0	0	0	0	0	0	0	0	0	0	0	1045.043642	0	0	0	988.3549266	1027.983877	0	0	0	0	0	1048.824539	0	0	0	0	0	0	0	0
PA(14:0/18:2)	169.0989489	0	0	402.9016581	0	312.1500747	0	0	0	358.3264493	0	0	1184.871103	0	0	199.1237739	174.3860321	0	1027.945806	0	0	1528.792973	0	0	0	0	0	562.5258616	0	530.9928738	1007.5678	0	0	0	0	0	0	0	0	0	0	0	481.4231881	1622.852893	0	0	0	0	0
PA(14:0/18:3)	1047.566522	0	0	461.0547987	280.5886275	648.9445273	277.2045725	0	560.3682625	214.2259644	0	212.5587988	0	969.3956439	0	284.0822041	1046.622547	0	0	0	0	0	0	0	221.9645173	321.94989	0	0	0	0	0	0	0	247.2386985	0	361.0360413	229.7021801	434.938213	370.5654014	0	0	0	0	1083.409546	0	0	0	0	0
PA(14:0/20:1)	1562.580658	0	0	0	0	0	0	0	984.8783449	0	952.7487927	0	942.2134295	0	0	0	0	0	0	0	0	0	0	0	0	0	0	0	0	0	0	377.1816468	0	0	0	234.1259402	0	0	0	0	0	333.4086045	562.7242364	0	0	0	0	0	0
PA(14:0/20:2)	959.3187956	0	0	1057.853	0	0	0	0	0	1006.607351	0	0	1580.240516	0	0	0	0	0	0	0	0	0	0	0	0	0	0	0	0	0	0	0	0	0	0	0	0	0	0	0	0	0	0	1065.43243	0	0	0	0	0
PA(14:0/20:3)	0	0	0	0	0	0	0	1002.489021	0	0	0	0	0	0	0	0	0	1570.583486	0	0	0	0	0	0	0	0	0	937.8471335	0	0	0	0	0	0	0	0	0	0	0	0	1049.346877	0	0	0	0	0	0	0	0
PA(14:0/20:4)	1571.586659	0	1544.36405	0	0	0	0	0	1047.348916	0	0	1047.991333	1054.020424	1013.743359	0	1022.329804	0	0	0	0	0	0	0	0	0	0	0	0	1579.398377	0	0	0	1045.976253	0	0	0	1044.973362	0	0	0	0	0	0	1057.344217	0	0	0	0	0
PA(14:0/20:5)	0	0	0	0	0	0	0	0	0	0	0	0	0	0	0	1024.576199	0	0	0	0	0	0	0	0	0	0	0	0	0	0	0	0	0	0	0	0	0	0	1578.580305	477.7479549	0	318.385395	580.173907	0	0	0	0	0	0
PA(14:0/22:4)	0	797.9509401	1045.473211	0	0	0	0	0	0	0	0	0	0	0	396.2522405	0	0	0	0	0	0	0	0	0	0	0	0	1036.166524	0	0	0	892.4038665	0	0	1556.106468	0	0	0	0	0	0	0	0	0	605.3882913	0	0	0	0
PA(14:0/22:5)	0	389.3168072	323.4995443	0	0	0	0	0	0	0	0	0	199.8165049	0	0	535.3463386	0	0	0	0	0	0	0	0	0	0	0	0	0	1506.080003	0	0	0	0	0	0	0	0	600.4838799	0	0	0	247.0226135	0	0	0	0	231.7339141	0
PA(14:0/22:6)	0	0	0	0	0	0	0	0	1049.717649	0	0	0	0	0	0	0	0	0	0	0	0	0	0	0	0	0	0	0	0	0	0	1053.522899	0	0	0	0	0	0	0	0	0	0	0	0	0	1048.73694	0	0	1587.107083
PA(16:0/14:0)	0	0	0	0	0	0	0	0	0	0	0	0	0	0	0	0	0	0	0	0	0	0	0	0	0	987.5945817	0	0	0	0	0	0	0	0	0	0	0	0	0	0	0	0	0	0	1040.099381	0	0	0	0
PA(16:0/16:0)	0	0	1015.72358	0	0	0	905.3524786	1391.619917	2000.540388	1041.95942	1012.733788	0	0	0	2471.614932	0	1348.73525	0	0	0	0	0	1256.301277	0	1535.78368	1002.194032	1286.630595	0	0	0	0	0	0	1269.365792	0	0	0	0	2051.548139	0	999.3602218	1003.592805	3017.84372	0	1190.75465	1017.089268	0	0	0
PA(16:0/16:1)	2003.325083	0	0	0	995.7686688	0	0	1508.917646	0	0	0	1212.186175	0	0	0	0	0	0	0	0	0	0	0	0	0	0	0	0	0	0	0	0	0	0	0	0	0	0	0	0	0	0	0	0	1050.013404	1003.550157	0	0	0
PA(16:0/18:0)	0	0	0	0	0	1052.93374	0	0	0	1562.665841	0	0	0	902.339894	1503.273354	0	0	0	0	0	0	0	0	0	0	0	0	0	0	0	0	0	0	0	0	0	0	1009.704412	0	0	0	0	930.7869612	0	1609.76527	1052.951701	0	0	0
PA(16:0/18:1)	0	0	0	0	0	0	0	1786.310328	0	0	0	0	0	1737.281931	0	0	574.7526108	0	728.7299854	0	0	0	599.078829	0	0	9646.351398	0	992.5320637	4383.594912	9806.553303	0	3454.341901	0	834.3864234	4020.799338	1056.58469	1440.251772	2020.604605	0	0	9264.686548	0	0	0	2355.846688	2600.801243	879.4955322	0	1465.220815
PA(16:0/18:2)	0	2455.498693	995.4968408	0	988.0960852	1484.745843	1992.747427	0	0	0	0	0	0	0	1726.459938	0	0	0	0	1546.03938	459.2271713	0	485.6514205	1027.885637	0	0	0	0	1551.913481	942.2403587	1047.414821	1527.210334	1041.730337	0	0	0	0	0	1564.517714	0	0	0	1515.959693	0	0	0	1000.011693	0	0
PA(16:0/18:3)	0	1265.710915	0	0	0	0	1253.227895	0	0	0	0	0	0	0	0	0	0	0	0	0	0	0	0	0	0	0	0	0	0	0	0	0	0	0	0	0	1055.90788	1072.156513	1574.422001	0	0	0	0	1075.195269	0	0	0	0	0
PA(16:0/20:1)	0	0	0	0	0	0	0	0	0	0	0	0	0	0	0	0	0	0	0	0	0	0	0	0	0	0	0	0	0	0	0	0	0	0	0	0	0	0	0	0	0	0	0	0	0	0	0	0	0
PA(16:0/20:2)	0	0	0	0	0	0	0	1001.383371	0	0	0	0	0	0	0	1053.981989	0	1578.53485	0	0	0	0	0	0	0	0	0	0	0	0	0	0	0	2042.279871	0	0	0	0	0	0	0	0	0	0	0	0	0	0	0
PA(16:0/20:3)	1006.998514	0	0	0	0	0	0	1039.455613	0	0	0	0	0	0	0	0	0	0	0	0	0	0	0	0	0	0	0	0	0	0	0	0	0	0	0	0	0	0	1047.278737	0	0	0	0	0	0	0	0	0	0
PA(16:0/20:4)	0	0	836.1957062	0	0	0	0	0	1046.622592	346.5021868	0	0	0	0	323.4637669	510.1389121	0	0	0	0	1046.479158	0	0	0	0	0	0	0	1054.10551	0	0	0	0	0	1018.95569	0	1419.451817	0	1035.23242	0	0	0	0	0	478.0431549	0	0	0	0
PA(16:0/20:5)	0	0	0	0	0	0	0	0	1585.984157	0	0	0	0	0	0	0	0	0	0	0	0	0	0	0	0	0	0	0	0	0	1019.950409	0	0	1053.259437	0	0	1001.355347	0	0	0	0	1039.655804	1544.484767	1079.31435	0	0	0	0	0
PA(16:0/22:4)	0	0	0	0	0	0	0	0	0	0	0	1041.95942	0	1047.557552	0	452.8632189	0	0	0	0	0	0	0	0	0	0	0	0	0	0	0	0	1054.213511	1196.522324	0	0	0	0	855.6357307	0	0	0	0	0	0	0	0	0	0
PA(16:0/22:5)	0	0	0	0	0	0	0	0	0	0	0	0	0	0	1048.550249	0	999.0656877	0	0	0	0	0	0	0	0	912.2598844	0	0	0	0	0	0	0	1042.980198	0	0	0	0	0	0	0	0	0	0	0	1057.280756	0	0	0
PA(16:0/22:6)	0	0	1048.157379	0	1042.074461	0	0	1034.347737	0	0	0	948.289323	0	0	1556.32546	0	0	0	0	0	0	0	0	0	0	1572.868432	0	0	0	0	0	0	0	0	0	0	0	1053.938413	0	0	0	0	0	0	0	0	0	0	0
PA(18:0/14:0)	0	0	0	0	0	0	0	0	1582.92781	1056.306411	0	0	0	0	0	0	0	0	0	0	0	0	0	0	0	0	0	0	0	0	0	0	0	0	0	0	0	0	0	0	0	0	0	0	0	0	0	0	0
PA(18:0/16:1)	2994.661436	0	5499.666444	0	1999.232475	1494.791867	2997.879914	3492.459746	996.6866343	996.9998463	2506.806633	489.9776581	1967.534384	1500.483723	2504.968661	3494.847161	1858.662242	0	0	978.2941455	2027.392979	1011.850591	0	0	2017.330398	1540.106836	1010.271441	2532.071526	5063.67498	2020.310091	5937.858499	5566.617704	3028.995903	3508.102364	5383.703907	3136.065275	1518.368699	2524.927703	2077.276642	2526.079218	1533.356787	477.1716753	1518.033297	2622.832814	3991.557679	3492.060292	2001.441375	3994.258812	0
PA(18:0/18:0)	1509.766517	1007.111362	9909.572891	1515.908966	1944.536484	1505.347353	1514.218418	0	3035.341583	4401.593608	988.0303993	0	2356.244995	1996.275093	1411.574837	4054.530227	0	0	462.6577873	1513.480146	0	0	1514.117888	976.2872355	1008.166006	1926.485253	0	2529.632795	5054.094922	5214.476293	1303.98703	3498.477369	0	1368.46304	4098.21848	2286.45248	1977.797912	2544.498349	1428.718679	1561.380792	2065.400239	1485.609803	2056.625083	0	2991.881304	1464.375994	1993.519194	1027.497233	0
PA(18:0/18:1)	64208.60098	56100.46308	197322.1739	72358.33321	53902.56707	82386.69474	74400.22801	115814.5429	80215.6815	147763.3997	98177.85149	69622.94469	120973.6399	45935.28783	64850.98563	117950.7466	89124.779	13420.54639	17826.52292	14157.51105	25233.48056	18658.1651	21407.13776	10695.64863	43899.52952	72927.79732	51762.03767	111740.8111	180692.3147	126467.2931	140900.0001	198661.1543	55167.8497	107055.4694	180089.1795	92792.56911	130726.7914	45470.82578	76642.43948	108143.3418	77379.20649	59037.69493	74208.54931	78839.08159	93574.16092	121172.6269	35571.05324	57364.10664	47950.20515
PA(18:0/18:2)	232487.6869	191778.9396	270604.5842	219038.7818	201880.0988	226241.304	180751.1519	267307.7603	131146.4993	180273.4336	142516.8145	244851.0299	264437.3993	165879.9335	226513.1267	162330.7501	188432.4438	30331.12066	59219.3593	66712.79478	53937.80655	51463.98142	86920.69084	52039.21567	146950.4146	185993.9549	71444.03167	271085.8233	295618.6188	150967.4624	237023.4952	486398.124	109568.8114	144833.062	470277.0672	99191.44111	546572.0448	46985.09706	139520.5808	278753.648	146895.0577	111424.0297	244178.588	91176.16161	151050.2952	194295.3547	64831.22701	36664.16392	64961.93321
PA(18:0/18:3)	4245.408401	1996.48741	5416.065438	5994.262542	2033.199567	4541.337353	1501.971625	2025.93539	1519.906987	5514.795188	2650.191065	2012.158746	8454.26857	4012.035836	2540.667234	2020.381923	0	0	0	2023.759206	2017.79815	3032.091455	0	0	3031.231911	1004.60036	0	4041.905208	2502.250684	3530.542288	2020.783138	3527.946016	1028.063097	0	7593.547538	0	8614.981137	0	4485.386253	3605.98837	0	0	1542.637142	2623.105337	8177.367312	2792.344325	0	2019.575723	0
PA(18:0/20:0)	2062.188864	0	2839.261225	4105.547027	0	1537.479299	0	0	2540.396822	0	3457.850854	0	0	2048.738682	2060.657837	0	1504.024492	503.5162797	477.5924511	2047.999395	495.7282783	407.3617572	1424.46055	0	0	0	1027.737329	2667.861773	921.287111	1689.651032	2981.03287	3014.422452	1529.484025	3937.1275	7180.474778	5018.518363	5924.684258	1529.920947	923.7783944	1529.035664	1037.159087	3561.677518	0	3135.818373	2349.850065	1507.017483	0	980.805676	0
PA(18:0/20:1)	0	1516.542607	1525.042439	1550.415589	4027.486375	0	2293.287753	2547.405298	6086.600911	1059.459711	2066.961664	2561.312182	7664.512252	2567.192785	4076.679941	3076.935095	1530.175708	0	0	2038.790623	0	1009.259929	0	0	1009.854723	1551.627553	1022.578285	4888.126548	2544.887524	3571.614863	3522.330579	3527.882546	3060.294763	2528.013725	2557.586604	2423.198636	3061.202082	2384.317869	2541.970428	1033.278509	2587.163749	1028.922676	2564.516632	1045.877644	4053.570042	4011.624196	2004.306213	0	0
PA(18:0/20:2)	1530.876245	2890.964043	3969.192001	2560.004586	1584.634099	3403.691965	999.2678623	2819.645241	3039.073708	3078.361142	2545.777929	0	3043.019348	2043.347396	1312.122265	933.8168906	2563.103857	0	1016.410812	440.3282865	480.8469499	1035.364594	502.898822	0	1012.205657	4647.884313	3091.633969	3013.153058	5234.076035	1868.946595	4213.057507	7657.855019	0	1283.206607	9707.30127	4064.411075	2318.79736	0	4807.752184	3560.461289	1033.474838	2056.309081	1886.67139	3624.516896	4572.492432	4523.676227	1009.298536	1495.054086	1542.706093
PA(18:0/20:3)	44231.12583	28934.5263	124319.2349	47952.81959	45323.31849	53418.25739	36626.7341	66192.2861	44911.85764	74527.8663	51337.24983	41508.06361	64209.63396	36727.82611	49858.54339	77446.8231	38801.4897	9405.145978	9747.889155	10596.56824	8181.868346	3433.516009	21679.51363	7681.442363	39121.12556	52863.23709	18152.66397	69450.78088	100353.9197	62349.0782	63644.19366	125192.2955	33473.35274	56892.87163	99657.01127	53664.49543	83723.72077	18579.98957	36563.12611	75917.28466	30762.4618	27310.64089	60670.61146	34874.29543	66438.58246	88374.49154	15226.27229	18468.97891	23883.90296
PA(18:0/20:4)	419184.9802	425948.6952	1541238.417	532638.2097	731892.3465	965298.5921	423801.134	1140883.394	496241.7194	1341185.866	892112.1637	528477.6132	733253.8209	375072.2908	610659.8901	1163322.625	510440.6015	95949.88612	92253.05682	93990.90944	68134.79043	57995.78771	146718.6667	78382.91657	262198.143	544854.0557	163792.1632	568061.261	941778.0706	793151.3108	634421.1254	1085085.376	268517.36	633694.941	979168.5806	644133.4578	601149.8399	204271.3591	381666.0378	637964.1742	363223.0815	236001.5942	669324.3663	406755.0243	583110.4365	785834.2469	181978.2276	295139.8256	195937.8955
PA(18:0/20:5)	1554.585896	2592.038282	17640.15805	9303.688123	30168.84057	14546.65831	16431.77706	32630.25855	8038.414395	19712.06334	8300.269207	9325.684124	24330.00223	3040.544768	18686.67904	19190.41391	6755.238081	1553.153286	2982.740578	1559.164295	2593.058875	1032.1597	3091.561082	0	9272.868365	23552.46647	0	7241.381007	14567.43934	8846.126987	8294.051394	14039.97255	2605.311618	7261.684548	57248.10286	4670.147075	10243.24539	2602.405688	16424.35517	2083.466921	10152.56965	6193.051074	8991.156262	14043.79575	42919.3452	15411.48691	1536.369146	4106.812651	2047.950248
PA(18:0/22:4)	87470.79585	51957.82156	283104.5671	73090.33034	124816.1267	244228.1222	80642.96223	167662.6405	96261.65182	539084.3142	371572.8805	128078.0753	149267.0851	118253.655	91029.39315	253044.3567	142211.2945	19220.74788	11012.07066	7282.046413	18668.49762	12995.10122	26977.78623	23884.30368	38431.56936	86805.95693	37213.44633	127007.5907	401481.2344	306563.0055	164329.3002	235160.2093	67662.15452	109227.682	204336.3147	257832.8598	96774.41436	59340.13992	78803.35737	194799.4831	83625.32735	71440.34579	170107.3521	175107.0505	107117.905	187405.8828	52308.2323	143931.227	63880.72538
PA(18:0/22:5)	67224.79968	40443.52345	169661.5701	66875.2113	98191.48895	106404.2042	58641.59519	146344.845	73509.47379	207177.6358	179413.0081	86265.73843	101774.1927	59829.2471	74385.69728	143712.3679	84676.85901	13545.22773	14359.8503	10391.66539	19172.30928	21241.73098	17100.13452	9330.470029	28522.77081	82762.05241	21885.79551	84505.80914	188551.5816	114396.2459	98117.10347	159001.4123	44718.3595	122398.462	193104.1942	82143.07005	104565.6954	21068.2817	81815.5253	54888.71967	83403.6915	48035.64118	79324.32292	59503.15434	62394.57639	81116.09305	40408.07129	58789.60273	32953.90429
PA(18:0/22:6)	68860.84013	65110.45316	146449.9319	56821.92146	109934.0166	91716.65917	70746.78487	130809.8072	54300.03698	47662.06336	57915.03641	53438.30827	101381.2027	45238.92282	82551.68324	85165.78135	49568.3035	5627.119864	9376.788021	9896.871001	5206.485437	14580.17924	7981.72742	7167.148786	29511.31934	61821.53653	14477.93365	57964.0677	62792.20518	60913.78614	83883.36556	109374.6713	12467.31396	90046.71077	116030.8853	56810.35058	63703.55244	36500.99449	69774.31707	15117.73335	60008.6378	33141.90914	51543.82744	42428.2158	44874.9049	42584.60033	19173.87479	28348.25925	25852.61053
PA(18:1/16:1)	0	0	0	0	1056.19137	0	0	1026.557516	0	1501.116121	0	0	0	0	2335.180751	0	0	0	0	0	0	0	0	0	0	0	0	1065.705651	0	1542.738849	0	0	0	0	0	0	0	0	1036.717785	0	0	0	0	2089.902516	0	0	0	0	0
PA(18:1/18:1)	0	0	4054.946481	0	2015.850601	0	0	0	1013.626818	775.1507137	0	0	3401.641804	997.0626068	0	0	0	0	0	0	0	0	1008.319795	0	1009.275098	1549.421389	1505.947449	0	3530.155966	0	943.2870495	1513.42934	2023.923858	3035.663432	1420.647285	0	5792.688677	0	1514.817957	0	1543.492429	1885.971369	0	1556.036812	1495.38302	1072.018231	0	1002.959221	0
PA(18:1/18:2)	1007.014281	2003.863381	2517.973649	2002.747167	2502.528141	0	2367.745167	2498.849474	1937.539397	4009.49439	0	0	3521.525267	0	2000.468282	2495.059161	0	0	3063.633025	0	489.9938952	0	427.991312	496.4000667	1514.621799	0	0	0	3158.477993	0	1010.584442	2526.034685	0	5064.001325	4562.097685	0	4508.022475	0	2525.894543	2018.374777	1547.31452	0	1007.970309	0	0	2390.013067	963.3448094	0	1494.571658
PA(18:1/18:3)	1573.962054	0	0	881.2214069	0	0	218.5990752	0	0	0	0	0	0	0	0	0	0	0	0	0	0	0	0	0	459.3433188	0	0	1036.166524	0	0	0	0	0	0	0	0	0	0	0	0	0	0	0	0	0	0	0	0	0
PA(18:1/20:1)	1523.846713	0	0	0	0	0	0	0	0	0	0	0	0	0	0	0	0	0	0	0	0	0	0	0	0	0	0	1012.848651	0	0	1041.885431	0	0	0	0	0	1043.569186	952.316509	0	0	0	0	0	1046.081429	0	0	0	0	0
PA(18:1/20:2)	0	0	0	0	0	0	0	0	0	0	0	1052.074566	0	0	0	0	0	0	0	0	1053.914887	0	0	0	0	1565.421767	0	0	1568.46134	0	0	1052.751404	0	0	0	0	0	0	0	0	0	0	0	1083.297496	0	0	0	0	0
PA(18:1/20:3)	1044.299775	0	1552.243597	1044.849261	0	0	0	0	0	0	1551.936551	0	0	1498.458278	1532.98731	0	0	0	0	0	0	0	0	0	0	2570.487002	0	0	0	1052.528344	0	1043.683456	0	0	1016.739033	1513.388705	0	0	0	0	0	0	0	1086.041022	3067.913674	0	0	0	0
PA(18:1/20:4)	1034.347714	2082.787659	10368.23583	4886.102688	3919.332513	2587.093676	6098.281318	10863.41715	6754.570127	5445.63615	4674.560861	4301.206252	3622.444886	1002.381854	7795.003276	15047.36485	3124.433909	0	0	479.2988075	469.7153572	484.1004232	489.3244455	0	2069.406737	3117.082478	0	2054.940873	4546.546366	3236.349957	4446.55771	6092.718279	1564.080591	9288.759179	9370.979956	7774.453745	2992.993885	3125.442668	7797.393154	0	4161.382362	1913.152268	9167.560728	2580.698666	3426.621037	2555.025711	2030.546797	1022.312295	3596.135475
PA(18:1/20:5)	0	0	0	1037.934557	0	0	0	0	0	0	0	0	0	0	1619.663009	0	0	0	0	0	0	0	0	0	0	0	0	0	0	0	0	0	0	1013.79659	0	0	0	0	1044.913838	0	0	0	0	0	0	0	0	0	0
PA(18:1/22:4)	0	0	501.1173465	0	0	1041.95942	518.993378	1034.347737	1550.138575	2646.400162	1025.486909	1011.264669	993.3697065	1562.430742	0	1564.653	472.209622	0	0	0	0	0	0	0	0	0	0	0	0	0	1563.029906	0	0	0	1561.589741	0	0	0	0	941.7771353	0	0	1032.867758	0	0	1007.697978	0	0	0
PA(18:1/22:5)	0	0	1041.692484	2024.351951	0	1012.038238	1037.93608	0	0	0	0	0	0	1026.539554	1537.884436	1033.672761	0	0	0	0	0	0	0	0	0	0	0	0	1563.791588	1053.327138	0	1017.255724	0	0	0	0	0	0	1527.486866	0	0	0	1547.201573	0	0	0	0	0	0
PA(18:1/22:6)	0	0	3628.923444	0	0	0	4173.219583	0	2601.402779	999.2693404	0	0	3120.473739	0	1559.95938	0	1044.161341	0	1580.088484	0	0	0	0	0	0	3135.951515	0	0	1040.91138	0	0	1573.335681	0	3104.675597	2592.496609	0	0	0	2605.686589	0	1425.768261	0	502.1369879	499.9052672	0	0	0	0	0
PA(18:2/16:1)	1055.697853	0	484.9000483	0	361.4508768	0	0	0	0	0	0	0	0	0	0	615.288257	0	0	0	0	0	0	0	0	0	0	0	0	811.0118588	0	0	0	0	0	0	0	0	0	0	0	0	0	0	1011.956291	0	0	0	0	0
PA(18:2/18:2)	0	1048.136372	996.597807	1053.983509	0	0	997.1941525	0	1058.50639	999.2693404	0	1003.400479	0	0	0	0	0	0	0	0	0	0	0	0	0	0	0	0	0	0	1042.962192	0	0	0	0	0	0	0	1008.844383	0	0	0	0	0	0	0	0	0	0
PA(18:2/18:3)	1044.14338	1046.37262	0	0	0	0	0	0	0	0	2095.918461	0	0	0	0	0	0	0	0	0	1037.336268	1569.664764	0	0	0	0	0	0	0	0	0	0	0	0	0	0	1027.091792	0	0	0	0	1008.048063	0	0	0	0	0	0	0
PA(18:2/20:1)	0	0	0	0	0	0	0	0	0	1015.741496	0	1905.384475	0	0	1195.901422	0	0	0	0	0	0	0	0	0	0	0	0	0	0	0	0	0	0	0	0	0	0	0	0	0	0	0	0	0	1221.423036	0	0	0	0
PA(18:2/20:2)	0	0	0	0	0	0	0	0	0	0	0	0	1185.880157	0	0	1222.901863	0	0	0	0	0	1175.6001	0	0	0	0	0	0	0	0	0	0	0	1719.292068	0	0	1088.150622	0	0	0	958.9015309	0	0	0	0	0	0	0	0
PA(18:2/20:3)	0	0	0	0	0	0	0	0	0	0	0	0	0	0	1495.64344	0	0	1056.006024	0	0	0	0	0	0	0	0	0	0	0	0	0	0	0	0	0	0	0	0	0	0	1020.296915	0	1572.423653	0	0	0	0	0	0
PA(18:2/20:4)	1556.296316	3095.965905	2057.896075	0	0	1547.93107	0	2066.27161	0	1548.515006	0	0	1542.636424	0	0	0	0	0	1020.342245	0	0	0	0	0	1020.243475	0	0	1537.037392	0	0	2074.747004	0	0	1555.379587	2206.87572	1036.564874	0	0	0	1014.001172	0	498.3505887	459.2910148	0	2551.229406	2901.319052	0	1004.880237	0
PA(18:2/20:5)	0	0	0	0	0	0	0	0	0	0	1013.055003	0	0	1053.789203	0	0	0	0	0	0	0	0	0	0	0	2096.649758	0	1009.856716	0	0	1042.962192	0	0	0	0	1563.624984	0	0	0	0	0	0	0	840.7187187	1018.910175	0	0	0	0
PA(18:2/22:4)	0	0	0	0	0	0	1026.636735	0	0	0	0	0	0	0	0	0	0	0	0	0	0	0	0	0	0	0	0	1044.867388	0	0	0	0	0	0	1548.411324	0	0	0	0	0	0	0	1033.717738	0	1012.082869	0	0	0	0
PA(18:2/22:5)	0	0	0	0	0	0	0	0	0	0	1041.957717	0	0	0	0	0	0	0	0	0	0	0	0	0	0	0	0	0	0	0	0	0	0	0	0	0	0	0	0	0	0	0	0	0	0	0	0	0	0
PA(18:2/22:6)	0	0	1037.970379	0	0	0	0	0	0	0	0	0	0	0	0	1645.412169	0	0	0	0	0	0	0	0	0	0	0	0	0	0	0	0	0	0	1563.649358	0	0	0	0	0	0	0	0	0	0	0	0	0	0
PA(20:0/16:1)	2041.430984	483.8306388	9381.747165	494.2313711	7617.500897	5053.876442	3070.067005	6120.987496	4553.060732	8602.221371	9347.263086	6080.784585	8452.211267	4051.609172	1436.321374	11682.61594	1903.824558	488.6824594	0	0	376.5916134	977.8160007	1533.405646	490.5087725	3554.227181	0	1003.161649	8057.24727	8723.161368	9747.355642	11624.00404	19201.95847	2889.984396	6763.441754	11192.89471	10580.73412	6551.892405	6384.025697	1493.435552	4802.86642	2581.501044	9757.710517	5120.775206	9045.181165	4479.29574	4734.662152	0	6542.847125	1513.031781
PA(20:0/18:1)	71038.47178	52207.05134	153256.6857	74689.05473	117576.9694	67454.92829	81932.58743	116412.2708	78289.26801	103038.0293	61653.34753	71634.48526	80393.16279	52654.02846	58879.54035	82192.24498	62826.30463	18906.59378	8551.111982	18848.52665	15927.80628	22062.16485	26567.60215	8501.835175	47221.09237	89328.93711	23758.63575	109962.8677	148024.8403	109602.6751	158935.7414	196712.4986	22940.1982	123310.4198	161961.0906	94452.02158	134845.8435	34594.1152	41331.72584	63489.44802	49403.39503	54687.29366	66125.43748	68575.6882	83794.52725	128124.3416	36041.30956	25040.3469	32087.82733
PA(20:0/18:2)	418628.2731	273398.672	478038.2728	363623.6479	354118.9784	357056.2972	331473.5705	479328.4186	222032.0293	269797.3647	256691.848	405207.0608	507666.4582	257733.3178	315107.1594	230525.1431	283802.1719	53685.39552	71156.71967	65062.55302	62884.88434	93725.78599	89111.72398	69774.97268	239655.3255	240720.7992	84854.16256	522515.8431	470574.3004	288739.4707	429038.368	876424.8944	125517.6306	288999.7361	800503.9252	224414.5632	726430.1486	78949.23189	199667.9353	315581.8408	302193.7408	155051.8879	320527.0426	159299.8306	217529.312	324113.6089	86020.59486	79065.78784	115729.9098
PA(20:0/18:3)	3585.59383	778.1564161	4650.270723	9060.511369	2864.268802	3324.549032	7007.1349	4384.594387	3337.518842	8258.989392	6657.019872	4925.036886	18374.24398	2546.421241	3276.447695	1676.58806	1048.096297	1363.628953	485.5404185	500.9653001	482.7275541	1687.574016	1191.844756	988.4588495	5580.380775	3043.380265	1039.164124	3767.03898	10280.69679	3119.069015	4585.154111	6259.368425	1030.273	1852.590477	10037.76882	1997.743096	5224.426562	4127.45576	2033.445423	8128.60316	2802.53814	0	3090.354829	5157.67479	18347.08195	5618.275443	0	1020.193561	0
PA(20:0/20:1)	0	1550.330509	3607.817737	2579.826647	3663.515284	0	0	7708.877364	5006.378281	4108.974317	0	1417.987928	1554.178334	1915.59613	3106.439982	2798.70724	1021.075073	0	0	0	1537.025409	1002.853443	485.4817061	0	961.6214395	1345.151527	0	2729.121333	2049.59575	0	3311.45983	0	2840.819251	923.2252556	4123.878263	1952.8135	1531.2122	1560.940326	1554.070276	2038.210301	5675.056505	0	2061.141869	4695.220777	1012.464227	2524.37057	1523.999806	0	0
PA(20:0/20:2)	4663.410189	2907.632425	6204.349593	0	0	3914.146498	4625.951965	2313.785126	3902.631586	4124.855109	2603.726209	1485.358546	7237.849805	1653.046983	2600.339489	3841.763755	0	0	0	0	1559.043308	2561.448688	492.4844949	0	2413.783002	1958.484731	1239.645396	5875.482433	2368.252731	1551.037531	3633.796371	9172.418395	1029.434757	3548.385288	9363.600347	5205.4892	4509.686466	2075.838943	1528.303187	1541.301957	2464.965917	0	3961.54517	1514.011954	2757.169504	3612.172221	1042.072984	1044.515036	0
PA(20:0/20:3)	80839.01383	55302.23486	169604.675	68900.33482	80222.54829	131635.5722	95087.91783	135603.6344	62358.6396	140513.8455	88603.74181	70435.77882	77780.18237	48718.47718	70977.8191	141997.1446	47776.41765	6654.748119	7085.684264	9320.737947	6233.646556	10369.21274	25152.07675	10564.32348	52077.67153	94502.46334	9762.946517	114805.8316	134891.8286	104726.2477	131754.0835	179391.8632	21854.58007	135979.7688	187257.1457	100027.2283	113551.8788	27691.01898	44539.96929	72217.85378	41460.13285	24557.30216	93668.57562	62261.29307	97565.01679	106731.4912	21180.08653	21149.42971	20442.39145
PA(20:0/20:4)	778029.2487	829280.7954	2780111.925	815092.9012	1408724.6	1872775.867	988824.317	2408204.024	878213.8828	2400734.612	1675350.483	999341.7954	1236058.795	631112.0829	1114961.548	2053455.299	970315.2691	145352.4373	137496.3738	138515.0184	98808.70584	106067.0995	223364.3165	141850.9798	459111.5518	838187.4613	236888.3356	1209949.464	1609688.439	1361746.154	1047029.896	1871425.471	334593.7616	1453153.707	1688908.052	1274341.082	903915.5797	466551.5504	496195.2774	791422.2614	524233.8904	291179.7108	1294487.963	769742.3955	1050298.777	1288683.615	292569.5993	482597.681	316358.3929
PA(20:0/20:5)	11661.50819	14058.12411	42403.57409	32743.85147	77215.153	29131.31816	40166.48736	84432.15806	23831.29163	33394.91204	18789.33163	15111.79699	46958.69732	9328.964376	29763.23192	44059.59928	12688.31941	2605.876553	7295.993504	5728.296043	3123.645792	2083.272631	8844.42255	2604.850663	7065.113509	46630.37366	1541.784119	39095.27543	26981.07537	25017.70093	20331.2675	36056.38398	6262.413631	41180.84172	110577.2199	17284.18965	17549.96984	6785.470498	24471.35468	12231.49987	37586.40244	9825.207666	30645.14017	39828.09181	125393.7527	26590.89735	11385.72489	4675.596707	8701.411567
PA(20:0/22:4)	98068.10617	70404.74251	327884.8228	53513.2736	160886.6742	284187.3608	66703.29347	162149.7394	97494.6664	678841.5382	514670.0586	153685.8858	147744.2681	93122.97724	91391.47425	344102.3486	132172.0978	14189.16913	4168.672132	4690.222692	13548.48617	17013.85746	26379.69381	21344.13091	41664.18777	54157.21371	33939.57019	168717.3148	406243.512	326289.9911	130191.5874	208556.087	27150.20551	76049.41896	157099.7417	242874.6634	65687.57837	78719.67868	44425.35957	118212.5427	40643.08211	36743.92714	153823.9158	219388.439	77656.49172	152043.5591	54527.9577	108590.8753	65048.18572
PA(20:0/22:5)	69865.41114	54181.68306	167438.4628	65117.87968	88825.29045	109755.7881	60718.18571	160477.2988	73633.20602	342128.9592	209627.9673	70534.54493	102979.2647	85575.87703	73021.6566	183503.6574	77580.85606	10875.63639	8906.010255	10384.70101	12299.85596	7185.258922	11978.6859	7289.458841	14582.31356	64749.15205	12911.25015	70327.54031	194302.974	116755.3694	79045.90396	121119.3755	14510.98054	93354.33063	128251.8701	65264.72206	81957.07657	54286.16552	56023.32089	41166.01477	40987.37839	39657.609	76883.34965	73456.65997	57938.64785	98486.26757	36705.98035	52150.73344	42083.46375
PA(20:0/22:6)	93124.096	81266.83081	193166.0541	104715.7322	96669.35951	112220.6698	100150.6762	238870.7889	62541.04208	97082.63367	93733.14714	69755.39781	124150.9891	65434.85366	77263.16211	132027.556	64120.39025	6085.506461	4177.928749	14516.37863	3727.885263	7267.33983	14131.36406	5688.853958	38284.24726	56348.94143	14603.46804	82204.5277	69815.57911	68634.17171	90372.45475	172129.6666	10180.23388	130077.4617	204110.0775	81929.12652	72605.96757	42966.52047	65068.9767	17512.65032	53924.67382	33639.67631	59687.4984	62028.22602	56157.80512	68125.26581	31387.84839	21181.532	28646.08826
PG(14:0/14:0)	0	0	0	333.879244	0	259.4330504	257.1891258	268.3508604	375.1875824	0	0	0	257.1872686	275.2056743	0	268.3399196	257.9543632	0	0	0	0	0	0	0	0	425.2019428	611.7967841	0	0	0	962.0353004	0	0	0	0	0	0	0	0	0	0	1130.862848	0	565.270617	252.0735262	257.0718696	0	400.8212779	1150.612522
PG(14:0/18:1)	950.6799079	0	831.0520572	536.076644	686.5059628	392.9505703	689.5609085	2156.448404	824.1315144	1135.077665	958.6384773	1092.356943	545.1374828	0	507.6048685	950.176889	543.976214	276.2750004	0	555.9881489	560.1596794	393.2162341	696.7560619	0	262.342709	394.9163998	0	1188.742496	646.7450906	560.9181686	1600.603927	1666.294994	0	2458.054063	1431.827061	961.5265619	649.3494523	415.5720261	1699.691228	420.5923099	1576.381549	1852.640575	1101.782425	1457.751608	1364.980362	1344.057737	414.4320415	416.7736949	692.3010561
PG(14:0/18:2)	1426.067071	519.5844788	652.7985224	647.6102598	373.3672798	372.8343694	1100.901237	1918.466279	524.8920617	1431.552239	1818.251903	906.2703957	1416.851695	0	916.0295232	1182.766815	1822.11427	703.011342	0	0	0	282.1171603	553.0055773	260.5948914	411.2528226	1034.531858	553.4708531	2635.263098	1527.142981	507.7837018	1103.446198	1461.137495	276.8350444	699.3773049	2225.616814	1114.801313	2209.627724	275.531231	691.4818907	827.5189307	767.0509524	659.4143117	900.4959756	1481.824018	772.5914293	1682.483414	0	0	386.3998645
PG(14:0/18:3)	0	0	0	413.4906828	269.9620422	264.569582	277.1433359	0	0	0	0	679.7380343	0	0	412.0861113	415.9992764	0	0	0	0	0	0	0	0	0	0	0	0	0	0	401.7285982	0	0	0	505.5601207	0	0	0	0	0	0	0	0	660.0671582	400.3837178	533.5462562	273.3906593	274.8335859	274.7752516
PG(14:0/20:1)	389.0979985	0	0	0	0	947.4778404	406.4507737	422.7857304	284.4912467	284.4912835	0	380.9688156	271.6883545	0	0	0	0	0	0	0	0	0	0	0	0	609.3003262	0	660.077293	0	0	0	0	0	0	494.9311	0	0	0	0	0	490.3081079	0	0	0	744.3107697	266.3243986	0	279.1022229	0
PG(14:0/20:2)	0	525.2659043	0	0	0	0	0	0	403.7488008	0	0	0	0	0	407.7356417	0	271.5108391	274.0093148	0	0	519.463391	276.2123604	0	0	0	0	0	0	957.4756033	0	407.2346501	0	0	274.4807121	276.4966434	387.6068513	0	275.4387493	278.4442002	0	493.1685701	0	656.7360698	0	0	0	268.9748026	0	0
PG(14:0/20:3)	510.5232614	0	0	0	380.9870065	0	0	0	0	641.2615164	0	0	490.851719	379.6873605	0	0	0	263.7790745	0	0	285.3526139	0	285.0247489	0	262.2245084	0	0	523.8508815	546.117545	558.4909781	0	0	423.511585	0	708.365016	0	277.0003075	280.1005151	415.2032862	0	535.9964471	535.6276479	0	0	507.8381254	0	0	481.343123	0
PG(14:0/20:4)	1211.647656	901.5438243	3702.639056	2036.263725	261.0726071	2584.807662	1766.437263	2353.683903	1226.637717	2160.30027	1799.202661	1227.172815	1890.406419	544.6089109	2481.294736	1394.728789	2171.9148	0	558.0898271	0	552.275376	698.1942212	419.7104527	0	837.4821248	592.9445436	529.1655057	3675.84556	1704.603508	1526.762504	549.6468797	1373.790599	0	876.4350368	1689.077023	1028.692763	962.2204029	419.2176735	1117.873092	1392.834399	0	1465.56616	3327.301613	914.3080419	0	0	544.0672015	0	267.6745771
PG(14:0/20:5)	0	269.9598012	926.2902189	429.3719036	703.7150929	0	0	549.6061655	0	0	271.4175899	563.0499504	0	0	0	414.2407022	0	271.040968	0	0	247.3024657	0	368.8101017	0	0	0	0	0	0	0	0	0	402.9836716	534.2427814	0	0	523.9270102	0	0	501.1618742	0	0	0	0	0	0	0	265.5473286	0
PG(14:0/22:4)	410.7362174	424.2386625	554.3397502	419.6525996	269.0897754	422.7768741	0	269.0240919	0	698.9970032	0	418.3326989	270.9324958	0	0	538.4434052	0	374.803096	0	0	0	0	506.5639937	0	0	377.6864214	0	0	516.5481151	0	0	0	0	0	505.6047376	1260.399399	0	0	505.4771557	499.1781849	497.3025702	0	0	927.0687383	0	862.4009929	0	558.7951167	396.3676881
PG(14:0/22:5)	425.5199033	273.4903116	563.0975726	685.5443548	422.4071232	836.4899428	0	563.2295457	0	1266.029084	824.5715896	410.3445411	820.6570345	286.0037008	839.2853797	563.3383304	0	0	0	0	0	0	0	0	632.0244974	512.2124309	0	999.9507039	0	0	501.8862508	620.7119028	0	752.424684	502.9113486	0	749.4373581	0	756.9578876	504.6676446	0	507.3385733	1014.720448	0	563.2283245	273.6141142	0	271.6040832	0
PG(14:0/22:6)	1267.26228	268.8428138	809.9928243	395.730247	849.0762288	416.7498999	281.0623335	845.074557	954.5687408	283.9683155	286.2849607	430.8765032	563.1623433	409.8513632	704.2185075	0	415.9228619	0	0	831.6591697	277.0204573	0	0	0	0	632.1495338	279.7559103	1536.762788	1380.351448	263.2373153	414.4454575	410.4260527	261.3396187	1254.865491	1258.167492	837.5725972	0	830.6164032	847.4393308	279.5121418	642.7089013	671.7653157	936.2425013	546.0957931	268.1865853	553.7422497	0	0	562.9929394
PG(16:0/14:0)	1049.087877	0	1042.181724	1182.16011	1427.549298	1048.937192	0	908.7667514	1686.60097	1315.900217	1177.06432	546.2490218	395.6671481	527.049181	260.1094419	2887.388593	248.8325243	277.6700512	0	251.4158711	0	0	1515.048111	0	0	1365.506615	0	811.652666	819.3494599	955.8522169	940.8799044	935.7850643	414.962776	6579.023838	1372.705134	635.3056508	488.9676866	413.3872009	1910.93186	270.3202272	0	1028.832304	1616.800463	653.4842254	16255.45892	1314.780513	0	0	793.8041711
PG(16:0/16:0)	8325.769708	3511.470468	12041.29636	3233.837456	4497.942298	14296.72702	2988.435695	10286.89988	11601.46089	15619.78781	16031.74839	4432.941339	9061.686064	3560.81747	6532.714991	23204.38597	4439.880853	1268.894453	1657.792161	978.8653371	2524.817016	1260.997634	4638.252423	2238.788359	979.4998166	9137.174507	5646.82639	11938.99683	9713.038449	12774.64128	9419.178551	10753.59711	4605.419878	28159.96238	8383.172392	17897.24307	6563.929587	11789.80361	9956.599013	3755.351088	3058.859267	7113.658801	6795.666654	4986.361114	39727.12167	13238.83246	4801.332043	4909.874885	6246.937758
PG(16:0/16:1)	1229.910803	819.0017916	1775.246749	1786.664396	2180.284886	3014.785441	1089.311397	3425.525871	8621.509064	2434.127422	4762.890651	1089.619769	818.5304302	1364.330138	2051.612812	682.8419648	1095.103514	983.1260006	278.5773584	257.2828653	841.9687311	415.5997572	3076.203984	0	558.2672731	3553.718463	1110.760204	4807.162942	1183.680252	2095.982047	2649.355888	4477.060044	2225.197172	23813.25557	6191.418259	6291.454827	2370.802395	1809.906714	6006.555241	0	3122.306383	6752.096659	3359.380467	2210.06911	71049.49911	6585.070485	1780.417731	2859.172146	2319.321812
PG(16:0/18:0)	3891.605602	2786.911221	7032.917944	1693.341291	4617.867006	10636.45227	2105.232123	7856.929696	6457.880063	7273.703027	6799.15936	4511.564845	4399.540555	2526.616322	5782.153911	10862.02812	4478.719279	1526.903969	1875.234641	557.8462921	3324.467083	2217.389168	2577.614514	837.2130205	1395.197374	4860.645933	1257.334341	9401.600546	9538.334835	10450.81524	4822.407288	12074.46571	1818.471319	16042.21921	8577.833571	13112.42728	7182.563788	4062.864538	7538.301282	2768.419881	3341.725783	6857.682218	3585.06926	5669.0953	10348.60444	7425.14636	3353.272141	3488.672809	3351.419785
PG(16:0/18:1)	68224.24649	45230.61877	102528.5909	68758.79439	89047.63416	142698.173	49602.21803	126727.3025	154553.6111	109750.4661	178926.0118	101984.3158	86072.8518	56796.73597	106881.6562	106345.8277	40024.00107	18521.70512	25977.64327	7216.835829	45644.58648	23433.22474	57112.3718	14333.71821	12754.1791	58690.04685	34034.77769	221874.4858	99246.44892	149910.3705	156738.9694	128517.0678	26559.54731	350980.809	182609.8701	256874.7896	73990.82949	131011.1753	173788.0612	25411.23121	119179.1977	208493.4863	120981.3674	163393.0737	297996.4528	125877.7138	84233.81875	75888.6634	84434.08749
PG(16:0/18:2)	49448.66747	12541.46821	28076.89537	21193.90475	27270.61411	55862.64359	18987.39877	37558.33306	77921.98217	75135.7759	57173.53783	28125.12368	27415.32136	24422.23368	40122.71515	52064.97589	25005.84497	12322.57057	15304.65245	4479.68834	31046.58229	11020.57238	29628.24119	8845.338946	3619.200731	27214.22015	9490.771328	45328.75788	27347.36368	38617.31032	26132.07204	41980.02012	6145.656327	111905.7424	50315.73653	68097.6705	49527.6874	32585.39905	35593.9461	13407.6	24803.52605	50268.94794	32457.47074	18176.69439	118727.1227	53017.05726	18753.86866	22592.95898	21011.52212
PG(16:0/18:3)	561.828904	421.8418796	285.5698712	0	562.1884715	822.317856	992.5694251	706.0516987	2394.480266	2106.893535	2402.293317	682.0697618	707.5601294	280.3542631	0	564.8077442	1405.434427	701.9753906	284.0814997	0	1391.351364	556.3529806	0	692.9036869	523.8806426	0	265.5626545	695.2539023	837.3665868	1820.58932	277.197419	1919.319781	417.3793557	2124.599704	1671.773866	1531.6293	2220.217176	0	520.9241209	0	0	1053.533001	399.196628	0	2370.878927	1113.726277	267.5019989	0	543.4161006
PG(16:0/20:1)	564.4105789	1690.967201	1263.481121	0	1127.09002	1127.620645	0	704.3460198	1691.105335	1670.80819	1033.048102	273.5378867	1268.590868	0	1691.436545	2114.241446	562.4039953	0	0	0	556.7645898	0	978.6485762	0	274.8096634	805.2859152	282.9133006	1536.581153	1113.512928	834.3338842	2373.10517	1531.555368	277.0892598	2362.005155	1806.19108	2365.810276	558.5602687	2098.253305	1952.467446	418.4355262	507.3299339	937.9504678	1469.124214	1563.072038	2171.964482	1065.694927	938.8915879	1053.198086	0
PG(16:0/20:2)	16388.97611	6578.652571	15286.99642	10386.59218	13326.73331	19969.13709	6029.60213	14595.58401	18479.34989	18405.91691	27528.56359	18171.43943	15288.76396	9589.309929	10617.45396	11807.16958	4432.628263	1117.330229	2074.63062	425.9222848	1450.688587	1955.119126	6277.529731	4029.404953	1674.720125	12371.23095	4176.974747	18360.50596	13576.25665	15756.81279	21231.60911	17504.37132	2232.083333	32339.01064	21741.89624	8909.057128	10643.04682	15673.70464	21554.4838	4190.691637	10479.32309	16506.01036	13719.31911	16914.14636	20505.94052	12166.98903	10873.0544	6568.699648	11219.44039
PG(16:0/20:3)	2663.592777	2387.123353	2108.599898	4373.027176	2951.287665	5168.529868	1669.608202	3896.184447	5320.779516	8160.860031	9780.456818	3353.903963	3234.109329	3935.657029	1310.349143	4044.012592	1393.372507	526.198274	139.4681793	838.2329643	1254.287111	978.1898613	2213.84868	297.378193	1348.586348	1868.647773	0	2336.243108	3445.606301	3404.106694	3619.412322	6403.486794	418.3312707	4759.670092	11233.06244	2430.289829	6850.837101	2095.930384	4702.008449	539.704205	804.88354	4058.596623	2203.482405	3660.466883	2890.041893	3788.961558	2211.780205	701.0423778	1941.603368
PG(16:0/20:4)	13548.8138	3172.606523	8379.415476	2058.058923	5226.422224	23670.21317	3589.471478	20955.34337	8154.449993	17863.27573	12466.84074	1981.985583	2812.764682	4929.418458	22906.10123	24575.12129	9741.812602	6046.286461	6660.381369	2129.51065	9271.789822	6526.601469	7187.336469	1903.312015	1215.544412	7230.850137	1193.023754	10345.87552	14655.06119	7348.232194	5966.644658	14714.40748	5381.216211	22458.52499	15716.48373	25192.92934	14993.8256	5431.510414	9729.186676	5283.372161	4912.525407	7308.814458	9849.744913	9805.183874	22920.87687	19856.16667	4724.691002	3272.789644	6459.556671
PG(16:0/20:5)	0	524.9753846	551.1219978	268.771341	393.7013211	0	281.8714727	273.1915236	0	984.7552907	0	0	413.2028204	0	0	704.8169994	262.1722447	412.8001524	0	0	0	0	0	0	275.2	532.1919527	0	0	1229.239383	0	403.1722323	1091.719062	550.23433	686.3868894	275.206599	0	818.0083797	274.6606063	543.4450341	0	0	0	0	1334.603832	964.009701	408.4639764	281.2536316	0	0
PG(16:0/22:4)	426.6641552	0	800.8765659	0	281.3543903	0	261.9975	537.3745476	0	272.0376973	270.504399	397.1975606	0	284.3566712	702.0941975	0	402.6630849	0	0	0	0	0	276.2689225	0	414.2891204	0	0	672.5162202	1511.006533	2203.834238	551.5127337	0	822.2765127	551.4498294	0	686.7475852	0	691.0772834	0	413.4960963	405.994953	534.1582095	934.7839309	1184.435453	1214.456621	532.6850653	265.6143823	400.1784879	408.2964567
PG(16:0/22:5)	373.8425213	773.4614981	1452.944233	0	880.5837094	509.2386834	0	1285.08318	1018.17763	772.1157864	2315.685926	495.6131548	372.1123194	260.2056199	520.304602	505.6223194	1414.962333	0	0	0	0	270.8681895	0	417.1452919	0	401.9950349	0	574.7624505	675.4738524	1661.098064	277.2105388	1652.335551	0	1245.707193	846.8535709	0	412.5549835	699.9984669	542.5242267	830.7811016	0	1204.688496	398.6904652	725.6354372	1370.500247	621.2261629	871.2056935	0	386.0011063
PG(16:0/22:6)	1025.752102	522.2748842	0	269.1844234	516.7778368	2175.476714	1284.10693	1653.122967	0	0	249.9318294	268.156703	1542.517787	537.4903225	1169.867401	1028.112279	510.1425225	555.7750645	0	0	1108.336016	0	0	561.7946946	549.9264646	482.6365514	0	780.7515038	273.862132	411.3029816	0	0	0	415.5690929	1108.899125	1639.104558	1105.422039	959.2390672	690.2579609	0	0	968.0170329	726.2777479	1030.00342	1388.493664	1153.711015	529.7987294	0	380.5139936
PG(18:0/14:0)	255.310479	268.9562511	254.0003163	0	634.4055842	1199.606008	0	662.2837884	532.2780367	924.8611495	0	396.004	400.1789692	246.1516057	794.5971246	2264.777219	0	0	0	260.5577553	0	420.3669291	698.6130096	0	0	0	0	837.4912142	562.788511	258.6844961	560.061599	837.0160035	423.3929566	983.968719	1397.587422	841.7124687	693.627236	415.6871678	417.3677114	260.8460402	717.6814208	482.2835684	690.6138266	539.2604928	4649.107426	397.0349482	0	264.5827973	0
PG(18:0/16:1)	825.1721328	414.1381902	1103.789559	690.4811083	966.6262204	1243.724403	420.1431724	1777.987643	1754.842653	966.9399111	1932.182048	552.6056032	1796.224067	966.124992	828.6998012	690.5558418	0	0	0	284.7039597	0	0	1255.882796	391.9055267	280.037498	2285.655045	417.6426842	1260.803156	1252.727046	2267.117547	1945.476913	1688.661458	699.0213714	8233.50909	1111.882278	3202.960709	1115.633038	0	3125.61699	0	0	2137.990777	1205.729484	633.5275756	15079.54927	3289.059737	0	820.6802359	954.4195585
PG(18:0/18:0)	554.0524419	2069.652085	3750.903682	786.6918727	4542.282134	4044.547316	1117.440321	3832.726317	4687.647223	2453.536644	3369.94162	4213.521797	1233.701057	1453.521495	1402.296032	5883.951981	1310.679983	0	558.9178871	976.6654223	1512.439591	420.3917664	1802.251868	1397.47959	698.7497326	2137.036154	1115.763356	7490.935554	4290.048905	4758.467393	3933.365846	3460.776772	419.3609649	5338.038603	4041.136833	9829.81583	3333.362157	1938.271994	6946.503674	0	2959.076957	5395.637519	2566.963555	4579.675795	10155.58192	3508.101722	2092.440576	2489.512859	1963.599375
PG(18:0/18:1)	51741.81007	24197.68909	55845.58334	29235.7002	82108.56865	94343.16264	27591.64058	88152.25207	111124.2587	68092.07305	99907.89489	77798.75796	36654.98902	33366.5536	62285.32508	71826.31987	23347.07201	12020.95771	11949.10183	12043.47325	25139.14121	11379.33378	41815.22299	8086.896176	8664.986812	53550.03238	19757.24687	130895.1153	72921.84511	99438.60244	65965.87078	55800.78839	8807.078277	133821.4238	86118.8006	238346.7521	45867.59704	51866.9054	116448.4376	12510.11576	52338.91491	109367.8513	52988.23936	103752.1913	183116.5359	70837.97893	55779.99651	35373.65042	25196.27399
PG(18:0/18:2)	60545.7464	42773.51399	61142.10607	30622.04978	64091.02211	99749.4157	38504.73679	70973.18485	108716.7345	105844.0496	128013.8083	75316.65803	44617.00756	44890.97112	70502.43208	79940.09291	40506.67252	12958.38724	14873.44167	8659.445184	27814.58629	13026.96645	35169.03121	18031.87709	13748.73994	50131.10766	17950.83994	77720.52729	63869.63091	107536.7659	56478.82662	65388.74754	8556.955684	143926.1449	75496.33638	126880.7538	69247.234	79927.91984	96176.16165	19697.31167	57190.64717	109312.037	83004.41258	101648.2016	164805.9729	98074.19457	41942.76382	34380.67859	31112.07286
PG(18:0/18:3)	1151.152901	0	1552.933789	394.011214	538.4466436	845.5934669	0	843.7312768	2255.282221	1690.106448	2112.135033	564.5794643	702.4011066	1677.728433	1268.519747	566.6338807	704.4432588	1256.121395	0	0	1676.330961	0	277.0135051	0	0	0	0	969.4560702	694.746394	2082.004382	272.3918742	992.3467878	0	3067.202253	1388.62384	836.5855645	1816.148563	0	415.0370616	418.7972462	612.213595	1696.359944	0	1126.874765	1044.253038	409.1611428	0	0	255.6310328
PG(18:0/20:0)	513.3342319	659.6307329	2054.030233	1264.972126	1054.080599	1250.069054	1110.146408	928.4591989	848.1390861	1780.513665	1066.620206	988.5887093	744.554319	1311.799921	1058.025698	566.8918752	1389.130779	346.4903126	379.3863717	0	0	0	576.4008662	0	380.0517771	554.559183	0	951.0663453	476.1857214	0	689.0302949	641.1405898	0	817.3287088	503.551768	347.7759003	586.4381555	875.97674	477.9104495	477.5680277	1129.901509	1797.118907	897.6384566	1713.672374	1570.518283	1877.506561	0	580.1722552	829.8657608
PG(18:0/20:1)	697.7740684	384.8240953	0	561.885624	701.5721488	1089.520674	411.1263794	684.5572027	4436.92355	1681.335022	1105.447675	1240.816782	555.2788497	392.436526	555.1761798	1247.853839	276.144021	277.8874941	417.6928924	0	556.2061853	0	1250.679721	0	0	936.5446138	416.0637496	1107.339856	1107.192121	1802.173037	1108.591998	416.6249896	555.4257305	1660.239947	1944.631738	1663.753029	556.5724184	833.2203925	2909.877557	277.0397747	531.8640863	0	0	756.8821976	2048.1327	1503.63165	0	521.9350841	674.9368493
PG(18:0/20:2)	8818.986234	3976.019373	6171.635867	3517.225652	8691.561322	10855.70142	3372.889411	6726.411198	14865.26402	13930.97497	16508.45928	11588.01215	4331.359541	4299.292834	7178.333487	7295.322904	3243.687689	1250.342507	1807.074997	403.2716906	1945.743887	492.3515458	4030.712231	2069.579764	2551.465353	8258.942376	3331.725966	9745.215433	7736.138462	8498.830787	8730.980005	7115.644808	0	11449.9414	11302.09654	11983.61139	4272.579605	5686.860205	11632.25662	1246.621017	3745.601267	5010.915253	6096.338052	9263.890315	21520.35046	5254.234357	7766.631404	6171.21499	1516.597917
PG(18:0/20:3)	3736.420503	1514.897206	2708.938797	1127.224076	1662.44141	3067.598159	404.5869149	2181.272989	8344.116293	2892.365657	6063.307763	1320.096412	1691.34683	1526.568834	2529.706847	1533.394134	975.918598	0	0	0	831.824962	551.1680242	1378.555954	543.9263332	831.3707181	3393.410499	693.3838853	1799.205862	3402.798602	5556.553532	1802.144344	3709.231639	552.7213068	5193.476798	5799.442436	2318.921871	3428.150617	833.844894	4021.657093	853.1691041	2008.115869	5347.933528	2373.299672	2924.122586	5065.579756	6519.024379	1022.290815	1463.111372	972.9062182
PG(18:0/20:4)	7499.749154	5306.755576	22615.07264	5214.952889	12159.47914	22215.86601	6072.322634	19188.54262	11471.77962	37053.53441	26981.79644	12195.15525	10307.27836	7119.006773	11050.13935	20952.83906	9391.686437	2228.772313	1840.889076	0	1310.299501	789.7466642	3805.797305	241.7738829	1573.306335	6583.503208	1708.449974	11100.24423	20827.60474	24652.33028	6942.713582	21750.96552	2362.279428	17148.03535	12174.28376	15780.11173	6543.654346	5549.445941	8014.792967	7090.35852	2491.868551	8842.704783	6357.433578	14348.2323	12848.20046	12444.06209	6260.234763	7770.540884	4374.81492
PG(18:0/20:5)	441.4992626	0	383.5234578	358.5599765	263.7899161	658.8851894	530.261989	0	528.0174003	0	305.4945072	0	264.2971021	0	0	276.7003299	544.1709124	0	0	0	0	0	0	0	0	0	0	0	0	514.6983115	0	0	394.9541085	0	390.1900271	0	0	0	0	511.925578	0	0	383.77126	375.5898885	517.8524802	277.4004805	0	0	0
PG(18:0/22:4)	526.5229086	265.0219414	1056.333815	0	0	646.4359284	0	0	0	1067.962842	0	0	0	0	0	0	555.6486645	0	0	0	0	0	0	0	375.912956	0	0	0	1177.8054	376.2267333	0	1107.26116	0	0	649.4893673	0	0	0	0	0	0	0	0	0	649.336088	694.0770371	0	525.7442171	392.4936091
PG(18:0/22:5)	389.971439	0	0	0	403.0924647	385.4707775	564.2356787	672.2881796	665.499181	533.7494211	537.7106623	671.8815505	537.4352433	403.4914685	268.5938956	0	0	0	0	0	0	0	0	0	0	0	0	0	401.7156337	801.0605932	799.9214357	0	0	0	398.3721689	0	0	0	0	0	653.9357122	0	0	1043.324732	670.7388212	529.9961939	0	0	417.3683327
PG(18:0/22:6)	0	711.3162702	834.8974372	0	354.6458753	1300.531983	480.2427293	1192.925516	361.9678073	0	0	360.8226519	473.0010732	598.6342449	1921.139456	1316.623645	0	0	0	0	0	0	0	0	0	0	0	0	0	0	0	684.803918	0	0	0	524.0125173	0	0	0	0	0	0	0	0	476.1556124	0	0	0	0
PG(18:1/16:1)	4838.916473	2554.286534	3645.535059	1662.379925	2806.633626	4848.017128	2775.526787	2768.318583	3868.170515	4537.664065	5737.467199	3567.149982	1864.071227	2527.642308	2109.473791	3991.329508	2248.512341	698.7533189	700.8953426	419.0837836	562.4204452	2375.16345	2222.303404	838.0057538	2492.961283	2646.013728	1248.398281	3822.706169	5134.074786	4428.62453	5533.831627	5086.093791	838.0238405	6100.684304	3362.481518	6194.709149	3418.639773	1941.881822	6086.821195	2201.214395	4062.759004	4567.113106	3341.052932	5332.881374	10283.2296	2788.662064	1870.539162	2027.663875	1412.153686
PG(18:1/18:1)	12796.23513	5588.569949	16035.00912	11289.54862	10969.87841	16139.49941	8316.543983	15431.51234	29892.58965	13296.49533	22828.65185	11460.82183	8632.06598	7841.356844	17458.05117	15919.62992	7331.219667	5556.082792	3255.961362	1251.255854	8872.985119	6514.180759	4340.850445	835.2395359	1237.389906	6248.16714	2222.07577	23377.10919	17186.35234	19476.48252	21514.84406	18045.43942	4574.471001	27049.8585	14970.58791	38535.97372	12562.68988	19757.29575	24427.98885	5918.640511	11971.18623	251863.351	195426.7746	23947.14938	23534.51742	19626.89703	6372.966292	12412.20577	11541.19663
PG(18:1/18:2)	30451.78758	27735.58475	53074.43868	50798.18525	52369.42677	41408.06582	40214.55477	24345.80072	100329.5269	37444.76533	117187.8665	103296.6747	65572.45397	71340.12873	50385.58239	24137.93697	34118.01343	2027.31933	3252.915905	2104.848994	6177.182108	3484.192547	9873.717753	7198.169672	3338.701844	26359.88733	13831.43512	106918.2852	17474.79338	80434.16652	239837.2883	29271.7505	7525.6731	69148.12039	80089.81274	80727.89205	95949.77207	106705.2263	123292.5846	18679.29101	130111.6713	112548.4812	45766.51606	66861.47126	72888.56043	31171.36179	97551.41128	96579.39226	71427.97796
PG(18:1/18:3)	2415.472586	1812.856392	1651.380873	2742.527144	2011.497133	2024.198327	2523.661853	2127.991936	4236.984654	1600.003872	2923.46689	3197.574822	2371.125457	2157.115135	1531.997441	0	1607.786039	0	279.0286787	276.2779979	1250.739286	0	263.5645148	0	395.345045	801.0471378	0	1659.799138	420.837059	650.1964545	654.3682738	417.2505454	279.6677897	557.7867977	962.3525408	279.1379543	1455.326997	0	0	0	0	802.9830133	0	1020.070922	4108.925365	1166.923046	0	0	741.4131651
PG(18:1/20:1)	0	267.988605	0	0	0	422.4645127	0	540.5514949	421.2463014	0	0	421.2439226	0	0	409.5094692	0	0	0	0	0	0	0	0	400.4385163	0	0	534.3387061	0	0	597.4162838	0	0	0	0	408.1249129	400.0090132	0	800.9727599	1197.545621	0	0	0	389.6164391	378.8035966	413.2694291	261.3843293	532.8800969	0	798.1259673
PG(18:1/20:2)	1567.495186	0	416.3697965	1247.997541	0	317.9988742	0	398.0627513	2185.523468	690.3608192	839.2320376	1105.489422	684.7254009	274.2735877	556.1568785	397.9465922	0	0	0	0	0	0	0	416.3785228	698.2063638	0	276.1141362	973.4278275	1261.916812	1112.149525	839.5701063	406.8665908	279.5358707	554.7270648	1672.017648	1439.849791	0	558.597376	1664.23576	277.8579921	540.8371379	1073.124922	530.2352057	1442.357448	1650.583693	1505.20145	0	0	794.8071277
PG(18:1/20:3)	557.9052994	0	2196.262524	507.4534531	523.0818097	559.2628121	384.8361887	0	1708.013062	901.6885577	1033.844255	885.9484444	878.3646418	638.9094957	904.769855	406.3004277	391.4593186	0	270.8784502	0	384.236569	410.0688356	278.1260044	0	411.1875001	0	0	1776.896706	640.3389257	1504.031729	1219.462262	880.559518	273.3264572	803.1810641	547.772085	540.3302313	555.857793	411.7308559	544.9923345	410.2539564	665.1558453	1058.103543	532.1747994	3182.515677	602.3610821	1292.161897	266.2519977	717.0527384	0
PG(18:1/20:4)	4932.43707	2928.642895	3920.955232	4361.895613	2661.132987	5096.227831	997.9029361	7064.956669	4410.863105	11444.432	3713.665808	2280.390517	4684.311261	2168.945393	9519.213096	10758.79703	4367.338438	861.3264854	527.9617746	663.7091094	1200.985602	1067.228564	1333.887999	671.3946944	1466.250743	4405.711467	1057.289541	7163.245898	5017.879026	9152.487946	4868.104058	4381.252318	1192.009612	9603.70899	6032.130398	3143.839836	5106.913323	1350.75407	4522.007373	1269.207666	1781.713136	4011.482238	2919.958044	1776.711764	5280.330541	1619.528833	1549.942541	1670.41207	1941.237342
PG(18:1/20:5)	539.6699467	366.5388922	244.6243972	244.6275004	0	899.7429277	254.029244	0	0	878.9851606	492.6752814	0	367.4616809	244.6429624	376.2495115	0	525.4906898	0	0	0	514.2985462	414.5663409	0	0	0	793.2839074	0	663.9207397	413.2908546	964.8421664	0	421.8411857	0	413.218678	690.9860031	688.3379518	0	0	0	0	0	394.2806658	0	0	616.3309569	503.7199058	0	368.6047471	249.4163737
PG(18:1/22:4)	0	0	265.7464574	384.3417438	375.7317624	751.8891928	0	0	375.9236851	1429.727859	515.4672337	256.4281566	500.1355926	256.0317604	257.0990939	378.9059486	634.3117945	0	414.7646239	0	264.238527	561.8857422	0	0	0	0	0	0	895.6978215	413.7679799	1108.026893	975.086657	0	0	834.838001	262.6185342	0	414.6163665	0	418.3017204	0	0	373.5064435	668.7047176	0	404.0623043	250.9546883	381.3654737	244.6269195
PG(18:1/22:5)	0	0	627.8471872	285.5751921	389.5823204	540.4179293	0	623.5667371	268.4911794	375.1147598	748.9586593	563.3151727	268.1470361	376.2609256	255.1394315	264.1715122	374.8975926	0	0	0	0	0	0	0	0	0	0	308.5163403	605.0509705	0	0	881.3945824	0	441.5804581	0	0	461.1557478	0	325.4418665	0	0	5449.973455	2070.430772	946.7650926	703.3650658	384.1625395	257.8269283	0	376.4447642
PG(18:1/22:6)	736.6677868	0	626.5801169	621.0246649	488.5786951	489.1733602	990.3985539	250.6241784	0	494.1111764	390.2582685	251.2110969	496.0044285	0	1252.232245	991.909873	375.8732481	0	0	0	0	0	0	0	0	707.7148218	0	712.2975437	479.6490794	620.619321	0	1197.154343	489.8900715	1186.876065	1107.55372	356.2729859	358.0066333	0	2385.874414	0	0	2957.998279	1056.455198	537.4127182	1110.143527	0	253.5925361	493.6735851	505.9880823
PG(18:2/16:1)	9655.909856	7992.604061	10493.54833	8758.656288	7167.006678	7851.683263	3700.058839	10018.53312	3721.371353	7499.622194	7136.90199	7836.290846	11806.23755	7889.095298	7309.90524	5971.044737	8403.922552	1708.575182	1331.163682	1730.417408	1159.075289	793.4864014	1996.753183	2389.347956	5010.095935	6017.640444	2286.76903	15068.22012	7138.507554	6547.814647	6843.750737	14565.6631	1189.834788	8311.080184	10006.45728	11135.80748	7741.801573	7037.068649	7820.571544	3831.703647	3078.293341	8606.401797	3559.829022	11841.50298	6601.636459	5207.857584	2858.275056	2672.892517	4056.701633
PG(18:2/18:2)	10697.77655	5490.58835	17202.82302	4942.432069	5619.288639	20529.26696	3235.86285	13645.48899	10617.7384	29167.95679	21989.62388	8961.86822	10481.27774	6894.080465	11186.59738	24913.86543	8257.4289	2087.786833	1362.145127	1817.465867	2607.101156	2647.210671	4609.951181	4189.946641	4494.223492	3809.035843	1888.311096	11144.75466	20377.06509	23630.70623	7073.179605	9681.936561	960.5736752	4404.969799	17966.67836	12369.21754	8024.003662	4791.86104	8595.967927	6996.991903	7285.453707	34890.5854	34084.88009	21153.59982	7826.204867	13139.18037	3467.282679	6278.812344	7425.145243
PG(18:2/18:3)	1575.33227	2315.468233	1187.369646	842.3446103	602.2183376	1222.064385	1522.809164	1484.656088	2683.527454	1791.896047	2118.230254	3193.139943	1814.517472	2111.157462	724.0671436	765.8890648	1423.876055	0	0	0	0	0	0	0	0	1327.354815	0	0	2350.7064	1400.72488	1306.084066	0	0	2547.550778	3091.598855	1659.157263	4039.732569	426.1442332	0	656.8816032	1506.125165	1629.686101	426.6194546	1977.843311	3366.418353	947.236141	1853.950271	1341.187586	1325.557353
PG(18:2/20:1)	0	388.8581596	0	560.0095166	406.5160112	287.4477145	386.2452795	0	0	1110.90109	0	420.7038595	272.1568493	281.823782	269.1182882	0	0	0	0	0	0	0	0	0	406.35	0	0	0	0	0	0	0	0	405.4323216	541.8	0	812.8067093	541.6668988	0	0	451.3317693	327.6931426	0	0	0	537.9839887	0	0	0
PG(18:2/20:2)	1834.251369	2377.646326	1680.830574	1444.605585	1878.682831	3281.248643	1653.073088	2403.734282	2292.02647	7945.596866	4134.547387	2768.452693	1964.912985	1496.723689	2350.712239	1824.992106	1629.055687	0	0	0	0	0	0	0	0	1303.744453	876.1070307	962.3570861	2147.830018	977.6838226	2796.771026	553.3246243	0	2558.517538	2449.495891	2599.025999	1859.150655	2064.049599	2329.233327	975.9976337	5782.19617	2240.081559	1770.850807	5878.740832	0	1032.744151	0	1594.448774	1338.060621
PG(18:2/20:3)	0	440.8014604	0	454.4875503	1217.569138	1570.089333	328.4451776	1115.523352	554.4860146	841.1707799	2453.400852	1170.346176	768.1241484	0	0	1227.966989	455.6043041	0	0	0	0	0	0	357.1546027	0	0	0	0	0	0	357.2250398	0	0	352.5585183	388.8732884	0	0	0	517.2701992	0	0	0	473.9302604	0	2055.957914	687.7479496	450.5885003	0	0
PG(18:2/20:4)	5065.447472	1720.562459	7963.894168	4007.854617	5384.076793	6758.790369	1879.513336	9536.498279	2707.285015	4904.394633	4611.579269	2633.766542	2145.760613	1365.775134	4956.663425	4097.91844	3383.334557	0	0	1130.928302	1262.523677	0	1278.905904	1356.982145	1274.948387	1983.00715	369.5247997	751.735201	1913.36492	3144.678697	2422.731545	2387.246211	0	6797.742579	1790.965771	3609.496795	1847.896453	2045.549628	1831.823181	1183.820373	2513.492501	12141.97104	8509.030504	4206.831638	4768.778977	2608.661383	2021.126637	2288.285426	738.5739048
PG(18:2/20:5)	0	256.2074833	0	555.3479879	0	386.140974	447.4992029	262.7358513	262.6735322	0	401.5395785	559.578875	0	0	262.6669191	393.8750327	380.1408108	457.8682716	0	0	0	0	0	0	0	0	0	0	398.8137756	0	338.894897	0	0	573.3259067	576.4530412	0	0	0	0	0	0	0	0	389.304698	262.7847933	385.8159864	0	0	0
PG(18:2/22:4)	0	0	503.7462205	0	0	397.6615423	260.0429068	0	387.3111635	759.4733156	0	651.3339569	0	0	252.0628091	516.4988755	531.3117272	0	0	0	0	0	0	0	0	0	0	0	1234.640358	370.130205	0	0	0	0	0	0	0	0	0	0	0	0	367.1600422	526.3623546	380.5018537	391.0366192	252.2575065	0	537.3917788
PG(18:2/22:5)	0	278.9240613	262.3210727	394.2489886	559.6840987	404.7838425	0	0	397.2963222	262.7008376	1049.863487	0	550.1494517	359.9962683	416.3885234	642.2982737	265.0364542	0	0	0	0	0	0	0	0	0	0	0	0	0	395.0227895	727.0428906	0	0	366.2497735	0	0	0	0	0	0	0	352.6039363	396.1884423	573.3370757	413.6418187	269.070226	0	0
PG(18:2/22:6)	0	264.5971667	917.8206713	520.9441035	537.9610123	536.0954123	283.4429308	267.8526646	701.3968982	401.745799	524.6374335	264.8325741	0	0	536.3415869	0	0	0	0	0	0	0	0	0	0	512.3647044	0	662.2943789	402.7807634	0	400.1954985	0	0	541.4924496	534.3721391	405.9380226	0	662.2098929	0	0	513.5090548	1788.22607	1066.057755	1299.778487	1547.141463	919.419245	0	394.9128935	0
PG(20:0/16:1)	259.5850246	0	0	399.1620774	0	0	0	706.604741	0	0	266.10547	0	0	274.1749554	0	0	0	0	0	0	0	0	0	0	0	0	0	0	0	1205.418417	0	0	0	744.2177631	0	0	0	0	0	0	0	0	0	0	660.724317	0	397.7783096	0	0
PG(20:0/18:1)	549.3824158	410.9930405	685.3381349	388.3936209	407.4627587	705.7048366	528.8834835	709.8618899	363.3418708	975.3525602	395.4983123	967.7470118	948.7322542	716.0498997	405.1447627	852.5873218	274.9189928	0	0	0	0	0	0	0	0	0	0	538.6795387	0	0	1178.95939	0	720.2795564	661.0158661	824.809191	1010.446761	900.2319304	1438.471382	1176.495568	0	1212.082097	1748.143061	0	875.463023	1262.862081	503.7651145	0	632.5951417	633.611987
PG(20:0/18:2)	1139.249941	669.6398405	946.8165055	918.8591005	931.1467694	659.1586107	776.2210914	673.5574554	540.0622382	1495.650073	699.7373974	946.6082588	826.4627456	388.7613922	810.9974022	946.5720821	378.391889	0	0	0	0	0	0	0	0	0	0	391.4627266	1847.3887	0	0	0	0	627.0616704	0	0	0	0	821.3427432	0	0	0	0	547.7829835	855.9570217	894.208521	852.1871567	458.0101965	492.8742399
PG(20:0/18:3)	270.0960608	839.6903727	0	429.8663357	409.3398272	0	0	411.7556763	273.5245611	0	393.8399814	287.1523396	0	450.2958372	0	0	423.3287406	0	0	0	0	0	0	0	0	0	0	0	0	0	0	0	0	0	0	0	0	0	0	0	341.0708068	0	0	656.0682748	407.5928428	271.3559126	287.869288	0	0
PG(20:0/20:1)	0	0	486.5526354	0	0	0	0	0	335.4821521	0	0	0	0	0	343.6766381	0	0	0	394.8142317	0	0	0	0	0	0	0	0	0	0	0	0	0	0	0	0	0	0	0	0	0	0	0	0	0	0	0	0	0	0
PG(20:0/20:2)	0	476.8757778	0	514.6179175	271.7374295	0	0	0	0	0	0	259.6022492	0	0	765.150114	0	264.5249537	0	0	0	0	0	0	0	0	0	384.2852707	0	0	0	0	0	0	0	0	0	0	0	0	0	0	0	0	375.7809437	0	0	0	0	0
PG(20:0/20:3)	0	508.041128	0	0	378.365192	0	259.1751422	540.8757353	258.2203337	0	270.5706739	0	656.4340755	374.8121651	0	377.8136166	258.8803425	634.7048529	0	0	0	0	0	0	0	354.5355435	0	0	393.3745206	0	0	484.6169887	0	0	0	361.2995491	0	0	359.1508031	0	0	476.490289	0	482.9749382	252.34261	252.7413105	0	0	0
PG(20:0/20:4)	854.468418	888.6317842	670.807218	401.7412353	631.4160683	1324.562135	497.9850036	1488.056856	533.6713261	1240.894508	375.1293034	905.6554569	633.8186697	792.9249494	537.1013085	1652.78	1017.560922	0	0	406.349869	0	0	0	0	0	1401.419719	0	842.6121592	1086.853753	0	0	1289.643357	0	1074.048814	962.0006006	1351.733358	704.9620572	0	799.0677516	0	800.1526789	939.2490576	619.1713539	0	963.3767503	2208.874628	0	856.4485994	0
PG(20:0/20:5)	0	0	0	0	0	0	0	470.437508	0	0	0	0	0	0	0	0	0	0	0	0	0	0	0	0	0	0	0	0	0	0	0	0	0	323.1959614	0	0	0	0	0	0	0	0	0	508.0487698	0	0	0	0	0
PG(20:0/22:4)	0	0	0	0	0	0	0	0	0	0	0	0	0	0	0	0	0	0	0	0	0	0	409.0140065	0	0	0	376.5161751	0	512.2250433	680.834629	0	0	0	409.702906	0	0	0	400.0462598	0	0	0	0	0	0	362.6959612	0	0	0	0
PG(20:0/22:5)	0	0	417.2288146	0	0	0	0	0	358.0000771	258.3313206	0	0	532.2485559	0	0	401.0964191	0	0	0	0	0	0	0	0	255.571722	0	0	370.1737676	370.7810943	0	0	0	271.04434	0	0	393.911297	0	411.4510338	509.6829984	0	0	486.6348595	388.2173839	0	0	267.5677068	0	0	0
PG(20:0/22:6)	0	0	525.313011	0	656.8591749	0	274.9054426	264.3344666	0	0	641.9206393	0	529.1296851	256.2872601	385.8122236	0	304.0020445	0	0	0	0	0	0	0	0	345.594862	0	0	0	0	0	0	0	0	0	0	0	0	0	0	0	345.4762354	0	0	392.2391585	0	0	0	0
PI(14:0/14:0)	233.2881609	422.5342253	0	0	493.3040489	0	0	0	706.0963107	0	621.0907612	0	145.4440013	157.7178642	0	286.7782534	157.5060282	0	0	0	0	0	0	0	0	538.8191612	0	0	755.4139776	0	0	0	0	0	0	0	0	0	0	0	0	0	822.5831017	880.03303	799.1928383	0	0	0	0
PI(14:0/18:1)	0	1479.412306	5562.247755	0	634.528135	0	0	516.3385989	0	869.8487056	0	0	1472.717992	0	0	0	0	0	0	0	545.25811	0	0	0	871.9533154	4325.495614	0	4860.260497	5425.414441	4730.208124	6360.030144	8478.568791	1153.615128	7989.075433	11484.17425	2813.546732	2505.671063	4294.516384	7369.93208	593.9233814	4072.228982	1712.448064	2395.375682	6008.636902	6430.055939	3709.276772	2927.57984	2091.231306	1932.915831
PI(14:0/18:2)	15518.0697	15067.17332	10632.40236	9894.38547	10044.71731	16471.71056	12222.9924	11300.61112	8340.516775	9729.603465	10947.45166	14628.01208	17086.70969	15786.94394	11828.65803	9085.567247	10960.8466	886.3264237	888.6042474	586.3274167	888.2521114	1177.790281	1523.985576	1475.52175	589.1684421	6782.313218	0	11182.26352	20889.0304	18292.33656	6623.311884	32493.94403	2622.260514	7131.509998	22099.40425	5917.746535	22238.53899	11288.8368	7965.340496	4174.854783	11546.07313	8577.225248	7881.52611	13194.99958	9935.884645	6641.252222	3412.484528	1451.944215	5582.357413
PI(14:0/18:3)	319.9389706	0	0	0	0	0	0	0	0	185.4085481	0	214.8678843	435.6265589	0	0	0	123.6783146	0	0	0	0	0	0	0	0	0	545.1370733	0	0	0	0	0	0	0	257.7265118	0	0	0	0	0	383.7621597	840.4820614	0	680.183117	460.0704863	0	0	251.3803511	146.1374723
PI(14:0/20:1)	0	0	575.9178156	0	1146.168507	0	0	0	0	0	0	445.8443663	0	0	0	0	801.6111591	0	0	0	0	0	0	0	0	346.4563162	0	0	0	0	0	0	0	0	0	0	0	0	0	0	0	531.5356794	434.2011718	0	0	0	0	0	0
PI(14:0/20:2)	0	0	624.1491075	692.8501623	0	0	493.5513648	0	493.3060512	412.8867209	0	0	0	0	497.2573415	693.3844007	0	0	0	0	0	0	0	0	0	0	0	0	0	0	0	0	542.4347258	0	0	0	573.6971576	0	585.7429761	0	563.3197526	0	582.230656	900.0642036	0	312.6901582	0	0	0
PI(14:0/20:3)	4666.098244	994.0168761	5059.308275	4178.944763	4277.287519	1538.08177	3094.984334	2192.239156	4998.271199	1432.210541	3391.662003	3283.856843	2472.793181	3107.099772	4058.758105	1680.258578	3618.244241	996.8063339	953.5727138	2411.769159	236.2702461	2892.205418	1192.148759	2083.26816	1688.277129	2470.866107	879.2425265	1897.624111	2131.465035	2110.238174	3512.12149	2296.956658	1371.13575	2521.491786	2910.758589	2058.416833	2789.563825	1984.132037	1908.257746	2422.770258	3529.955092	1414.304141	0	3461.938257	4127.357875	1465.544884	1880.781576	2545.676051	1450.457424
PI(14:0/20:4)	8733.980948	7278.827945	10143.1491	5573.357321	5533.890636	8131.129902	7824.702296	18545.51873	5130.648504	5098.19184	3345.563808	6943.839024	5674.659642	10863.41415	10017.77473	8215.909858	5010.517734	0	0	1137.190454	0	833.4112406	0	550.009101	1121.123347	10001.45892	0	7312.136607	18166.57011	8291.087161	4990.365911	9009.541237	1886.194517	7339.615475	7949.629945	7783.001256	8620.499862	5069.926917	6237.122651	2269.940264	3209.703965	3639.552451	11489.07271	9874.360691	8669.098262	3483.007654	3182.742257	4601.750752	5169.898525
PI(14:0/20:5)	829.6492782	1495.562878	1953.592488	829.8615384	0	869.2162468	0	3908.931382	553.8576003	1167.230808	0	1775.66355	1391.226829	0	837.7395045	0	1387.812841	0	0	0	0	0	0	0	0	0	0	1713.895231	1955.686317	1374.70251	847.132668	1093.20196	0	0	2198.197523	0	0	538.5003476	2274.366785	0	0	853.0136617	1421.256608	1029.607228	1445.309287	584.8665348	0	0	0
PI(14:0/22:4)	0	553.9326864	588.0592483	552.8271104	0	1406.259908	1400.300158	3114.068126	587.1775881	0	843.0981371	0	559.2928211	881.6393089	845.7583706	889.6524691	841.5934386	0	0	0	0	0	0	0	0	0	0	842.0397339	1650.375644	0	1123.870208	1641.884605	0	562.9451994	1092.376396	1633.411558	822.6468569	2186.969103	1165.730781	0	2086.786416	0	1800.530786	598.3333673	0	0	0	2036.028564	0
PI(14:0/22:5)	2107.95723	1174.883097	1382.379372	561.9822949	2485.906233	2588.313116	784.7077516	2232.227134	548.8139357	1109.837336	0	1042.768546	1110.268378	905.7353572	582.2490596	1926.316155	1451.484592	0	0	0	0	577.5307615	0	0	0	0	0	652.335793	1560.519952	0	0	1363.93338	0	563.2742676	817.8319716	664.8245454	784.4708107	590.4762751	1711.555754	0	2231.497391	0	0	1661.70916	1617.623424	0	576.0968594	0	553.7055532
PI(14:0/22:6)	0	499.9246609	1134.343016	686.0645788	229.526243	568.1816631	848.8169783	0	681.6128867	0	0	0	1416.299267	499.220593	1099.996022	1368.970114	0	0	0	0	0	0	0	0	0	822.7102312	0	0	0	0	0	0	0	0	0	0	810.3023249	0	0	0	0	0	555.2440852	269.6605539	704.1872158	0	0	0	0
PI(16:0/14:0)	0	0	0	716.7653961	0	0	0	0	0	0	0	0	0	0	0	574.6328306	0	0	0	0	0	0	0	0	0	0	0	0	0	0	0	0	0	0	0	0	0	0	0	0	0	0	857.9540378	0	0	0	0	0	0
PI(16:0/16:0)	1038.571566	0	2092.299209	0	1045.437412	1567.492536	1027.893762	1566.971076	0	1552.25985	1733.2419	2053.7321	1996.411232	2041.901792	1595.163806	0	0	1005.046951	0	0	0	0	0	0	0	565.653646	0	991.2931447	2594.549432	0	969.9350904	499.4710978	1054.029864	0	0	0	1037.336157	0	0	0	1045.397642	1565.177748	904.2996617	0	2171.572837	1990.364907	0	0	0
PI(16:0/16:1)	0	0	0	1051.092893	1998.032181	0	0	1498.152696	1493.643527	996.9998461	1044.125724	0	0	0	2074.232044	0	0	0	0	0	0	0	0	0	0	1030.132308	0	2384.444416	2224.992936	1372.277867	1032.906382	1426.347747	0	2102.457108	2539.535548	1242.113322	1467.94534	0	0	0	0	0	0	0	2132.853478	2616.616553	0	0	0
PI(16:0/18:0)	6491.704844	6275.658666	4589.393771	5387.648396	1607.326281	9737.799509	1949.465818	3133.458421	4137.112975	0	3985.450078	1823.983048	4762.344736	2579.445433	4872.298796	3440.118746	4603.424263	0	0	0	0	0	0	0	1562.259947	0	0	3111.751049	4564.54548	2081.174843	951.161893	0	0	2241.816305	3633.720276	941.8970601	3403.017859	1602.744311	2229.474394	0	3258.380123	1537.522131	1917.98893	2465.079734	1406.021216	4911.595894	0	3165.167636	1258.959025
PI(16:0/18:1)	2356.094365	2652.149478	4963.304029	2496.811311	1489.389196	1375.63622	0	5562.304178	2089.162413	1977.000736	2550.412656	1884.760407	3026.709056	0	1504.614002	2039.793084	1387.514086	0	0	1043.585569	0	1041.730382	0	0	0	2758.183976	2632.763671	8041.792591	1547.463992	8787.227809	3822.662026	4896.955051	3492.764711	5313.660154	10749.6795	9996.582873	12718.65093	3364.066221	1466.621176	6539.742929	799.4058472	1000.860646	1505.010343	0	1546.611737	5280.084548	1052.086301	994.9068109	4296.906653
PI(16:0/18:2)	2363.463103	4481.863525	3356.252397	3666.894443	2965.005609	3333.928444	2984.294163	4846.206338	1447.4826	11325.9886	4448.745662	10524.22419	4511.275236	1018.357929	1255.708233	2868.246509	5001.641964	1035.560333	0	2025.191042	0	0	0	0	0	6782.673329	1420.750886	4046.694685	7773.134014	4549.708619	4040.834736	10548.79037	1957.839688	15687.49495	29905.39059	8076.453477	10337.85444	8051.349292	5746.445098	7013.464705	2857.449433	2075.217868	1553.905621	2084.590767	2454.310696	4939.089727	0	3516.009296	6483.142196
PI(16:0/18:3)	302937.1589	167852.5027	173787.2134	564644.0836	260714.3561	229424.81	351340.9705	165187.9402	487761.3233	545896.5132	556625.0952	313387.221	267810.6484	281865.6661	258734.9061	273511.1486	361063.2035	21853.66836	22585.1705	18782.90043	49101.87872	43683.40086	31336.19692	12310.98009	36695.9939	303962.8972	32563.90333	416364.3072	632872.2169	631259.0005	316472.7406	716250.5293	46509.86778	476394.1634	817934.4994	179987.5605	1033937.444	154696.7241	377272.1509	60488.90394	211423.8904	336063.9032	263851.4423	233549.4348	563825.3051	177714.2462	252657.7389	102411.5648	166893.0499
PI(16:0/20:1)	0	0	1048.06903	0	0	0	0	0	0	0	0	0	0	0	0	0	0	0	0	0	0	0	0	0	0	0	0	0	1052.829189	0	0	0	0	0	0	0	2092.826167	0	0	0	0	0	0	0	0	0	0	0	0
PI(16:0/20:2)	0	0	1033.635417	0	0	0	0	1047.557597	0	0	0	0	1565.933582	0	0	0	996.3668798	0	0	0	0	0	0	0	1564.681418	0	0	1043.339016	0	0	1027.355648	0	0	0	0	0	2950.993901	0	1052.749926	0	0	0	0	0	0	0	0	0	0
PI(16:0/20:3)	0	0	0	1508.693682	1045.183909	0	0	0	0	424.0539146	0	0	2092.540845	2071.08557	1024.813186	0	0	0	0	0	0	858.9289561	0	0	0	0	0	0	1141.560288	0	0	0	383.0552308	319.9216379	3015.697515	404.3463963	0	278.5418349	415.5168205	0	389.6235923	0	250.4357488	0	3586.183093	1535.351653	0	0	0
PI(16:0/20:4)	5717.498567	11660.48549	8487.4742	6378.74598	2753.590981	7374.486382	1979.578858	5113.340995	8116.108452	6266.115079	6231.370771	5385.99381	6297.222404	2906.656193	0	4725.885558	2808.1083	0	0	0	0	0	0	0	0	12798.2405	3992.34683	4814.783792	8149.630437	3557.848595	10581.82891	7038.537973	4104.782218	25969.01363	20637.55286	8049.343789	17625.12296	6957.891492	3826.840486	2875.15617	6086.171003	2293.512186	2215.314042	1047.697835	4195.179095	4642.107082	996.457232	1868.840982	1580.264018
PI(16:0/20:5)	0	0	0	0	0	0	1055.679847	0	0	0	0	0	0	0	0	1057.26278	0	0	0	0	0	0	0	1456.683997	0	0	0	0	0	0	0	0	938.0981992	1575.292237	0	0	0	0	0	1573.302123	0	0	0	0	0	0	0	0	0
PI(16:0/22:4)	0	0	0	0	0	1543.067062	0	0	0	2086.760038	1023.429667	0	1559.491059	0	0	1418.784317	0	0	0	0	0	0	0	0	0	798.624859	0	0	0	2605.556152	0	783.5395555	0	1011.039235	0	0	0	0	0	0	998.0507533	0	0	0	0	0	0	0	0
PI(16:0/22:5)	0	1499.325244	0	0	1042.074461	0	2068.674831	0	0	1454.858563	1992.999455	0	0	0	0	0	0	0	1052.365408	0	0	0	0	0	0	1740.177466	1038.438674	1044.585715	0	0	2034.149858	0	2102.763373	2050.555181	1952.018022	2069.65604	2994.161115	2072.414335	0	0	1037.487228	0	1450.320189	928.9182998	1441.058651	2625.331857	0	0	0
PI(16:0/22:6)	1565.016576	1350.099732	1594.802643	1541.155554	1042.074461	0	0	0	0	983.2988104	1042.891889	0	0	0	0	1001.462524	0	0	0	0	0	0	0	0	0	1344.589565	0	0	2630.86932	0	0	0	0	2597.706751	2535.866933	0	0	0	2085.076882	0	0	0	0	0	0	1676.820738	0	0	0
PI(18:0/14:0)	0	836.1164864	0	178.6259849	162.0896196	0	0	0	0	0	0	459.9971857	0	0	0	250.8473536	203.1119844	0	0	0	0	0	0	0	0	0	0	0	0	231.4660494	0	319.8743042	0	236.554424	529.1560097	0	370.8522536	348.6459849	0	0	0	0	0	0	321.4791589	170.2954414	0	0	0
PI(18:0/16:1)	0	0	0	0	0	0	997.096881	1570.341156	0	1037.91664	0	2345.689956	0	1025.570951	0	0	0	0	0	0	0	0	0	0	0	0	0	2083.64953	0	1444.688289	999.3899889	1696.318919	1054.53764	4702.004923	1795.89943	2704.599511	1577.773964	0	0	0	1049.604717	0	0	0	1996.982485	2061.857032	0	0	0
PI(18:0/18:0)	1033.4258	2964.508398	6959.974835	1547.853203	1758.043256	4879.955996	2063.972677	4174.503546	6616.324476	7171.854923	2723.173353	2036.339195	6694.042285	2884.332919	5256.344674	8189.269044	4432.656219	0	0	1020.164323	0	0	2054.581916	0	0	1680.631527	1041.564019	2987.211995	13193.11461	6950.224143	2809.40679	12620.17756	0	6936.488672	3610.173841	7611.116434	1318.423885	5711.477639	2479.881207	0	7734.898296	2316.989085	3437.28713	4037.676419	0	1482.460525	0	1013.548474	2091.060403
PI(18:0/18:1)	5174.020663	2085.137253	2804.560387	1513.950099	1267.249179	1839.255523	2988.581922	3521.996038	2204.962184	1176.133876	4227.71708	0	1509.035881	2149.031806	2237.806531	708.224375	4580.187692	0	0	0	0	1015.08473	0	0	0	4743.200437	4719.938482	4123.996931	7908.987793	3631.196858	3641.972535	7158.594483	1516.77115	6003.370562	13675.37637	4237.801825	4071.65421	9743.011859	3514.501638	1925.104223	5136.449554	0	1549.537796	1565.883476	3316.232145	7653.873149	0	0	883.4135651
PI(18:0/18:2)	18004.38788	12872.2374	10602.60544	2643.031758	7029.877401	8637.797739	4456.968767	15029.18889	7513.080016	5098.281733	3267.520432	3847.439021	5183.829855	17757.69309	1347.908698	4478.074353	6345.113248	0	0	2569.386967	2034.577048	0	1025.496148	0	2928.901698	8966.030398	1075.861485	11411.47591	8284.801058	9846.03185	23967.69557	29072.40045	5661.209743	19138.1546	11037.22363	30375.75658	35826.80193	1973.592566	10110.84868	8274.517975	27033.1731	4196.838	945.9587445	1060.716244	2267.205247	3219.212588	1882.665097	1403.440129	646.4748674
PI(18:0/18:3)	0	0	0	1044.396854	1044.285473	999.9492283	0	0	1033.658187	0	0	0	0	2006.461354	0	1021.173564	0	0	0	1044.838837	0	0	0	0	0	0	0	942.850751	0	0	0	0	0	1438.720088	2103.880627	1053.52292	0	0	0	1053.772494	0	0	0	1078.85635	1290.798704	0	0	0	0
PI(18:0/20:0)	257031.3903	554771.7318	515438.0071	323544.2417	654921.2157	621205.5042	376130.7074	617113.6924	556560.0287	423952.488	405838.8005	437867.9508	545276.7867	264629.272	452890.6306	533401.1625	309010.5627	6483.202158	11080.93849	11136.46721	12168.31427	12222.9067	22961.98585	17008.50372	30772.94635	496240.3948	36664.78675	413023.4815	288865.8746	553909.2789	477121.3861	521463.4502	28537.5489	774259.1871	600441.3665	443753.6113	419594.4346	301489.1045	570560.9383	10839.59582	419307.8821	462738.6006	352164.2289	378677.9277	581146.6715	295141.6249	234772.1115	113673.8179	166728.3201
PI(18:0/20:1)	0	0	1046.794858	0	0	0	0	1500.326193	2082.515001	0	602.8799941	0	0	0	0	0	0	0	974.6800959	0	0	0	0	0	0	0	0	0	0	0	0	0	0	0	0	0	0	0	0	0	0	0	0	0	0	0	0	0	0
PI(18:0/20:2)	0	0	1054.056133	0	0	0	0	0	0	0	0	0	0	0	0	0	0	0	0	0	0	0	0	0	0	0	0	1854.94332	0	0	2010.25877	0	0	0	1798.921257	2078.266917	0	0	2605.327962	0	0	0	0	0	0	818.8901618	0	0	0
PI(18:0/20:3)	5203.859776	2578.201172	7252.649187	0	2074.727854	1535.028891	0	1114.997984	1222.53648	2697.156704	4664.151908	762.4319409	0	934.9907145	0	2429.727975	1464.519018	0	1552.255393	0	0	1046.55831	0	1562.205018	0	6407.634905	4276.187832	6971.488027	7490.123472	7148.206716	17335.38895	7514.856255	2469.472919	13631.07103	34412.16269	6063.593039	11802.47496	3139.350888	7443.666604	2293.678186	2942.230226	0	4172.925925	1568.725011	1062.499787	5707.286449	0	0	1251.326953
PI(18:0/20:4)	0	2245.441613	0	0	0	0	0	0	0	0	0	0	0	0	0	0	737.0837048	1027.510304	1687.550028	1555.454899	0	1052.347547	1053.857717	1567.571678	1421.102335	19776.96569	32797.81028	29258.63917	54397.79469	59413.07774	134022.7529	24949.00644	17334.58132	61050.54677	89326.82156	124777.2158	76046.2446	118231.1822	33167.8007	11163.97803	27154.1039	2561.037542	14009.00397	0	7419.970648	17146.80408	2996.480656	5291.528342	3762.407189
PI(18:0/20:5)	0	0	0	406.7482078	173.5814158	0	248.3496281	923.9345451	0	0	0	0	291.6487617	0	341.1005653	0	0	0	0	0	0	0	0	0	0	0	0	0	0	1395.152127	0	600.6962515	0	0	312.5353949	245.890219	354.6149111	0	0	0	975.9646106	0	575.0523319	270.8016736	0	0	0	0	0
PI(18:0/22:4)	0	0	1011.576006	0	0	0	0	1015.236493	0	798.069362	0	1526.601798	0	1026.539554	0	0	727.1633892	0	0	0	0	0	0	0	0	0	1043.488445	2057.462691	2588.837077	1851.292094	1316.121844	1563.600219	0	2377.981755	2094.071291	0	3110.658611	1904.040327	1042.143335	1010.172916	1042.335289	0	0	0	1056.850557	0	0	0	0
PI(18:0/22:5)	3641.469591	1001.48203	0	2088.108495	977.5217967	2319.328069	1873.32924	0	1502.406623	0	1563.24932	1043.564639	0	0	0	1044.414818	1549.056337	0	0	0	0	0	0	0	0	0	0	0	2657.451151	0	1009.856949	1512.117716	0	3195.028649	778.5338104	0	1280.944492	2830.064305	0	0	1573.894258	0	0	0	1527.601462	2498.036851	0	0	0
PI(18:0/22:6)	0	3688.576225	1364.296047	0	2732.799107	1057.016077	0	0	0	1564.760636	2574.906534	0	4205.7207	0	0	0	0	0	0	0	0	0	0	0	0	0	0	1322.906014	0	1026.897891	0	1313.128024	0	4360.335766	3197.920511	3328.351031	7903.706178	3981.214075	2043.68618	1027.791965	0	0	0	0	1581.450294	1039.189871	0	0	0
PI(18:1/16:1)	1425.60781	742.3460237	0	0	1581.826519	1006.99632	0	2100.491224	1003.44814	3908.759648	3022.628091	1728.359619	0	0	0	1517.29698	1007.077728	1042.358003	0	0	0	0	0	0	0	0	996.748681	2434.699285	1021.182061	1842.566521	0	2663.005381	1449.197869	3895.114958	1040.620098	1272.046659	3149.618458	742.2959989	942.8495241	0	906.6729685	0	1961.208796	0	4121.187386	1251.75797	0	0	1566.846045
PI(18:1/18:1)	0	1394.207495	0	4234.429191	0	0	0	0	0	2743.389221	0	4490.235866	1044.408498	0	0	1937.993788	1581.01492	0	0	0	0	3119.000716	0	1559.807955	2100.492248	3072.857327	1394.349881	5161.879633	6120.285542	7188.084747	5576.579408	2712.256556	0	5753.66996	3860.731301	3204.194769	4087.681769	4932.964691	2614.274989	2101.590902	1635.826685	0	0	0	1844.157865	1632.372932	0	1593.528045	988.1836509
PI(18:1/18:2)	3097.29823	1412.516772	0	1067.958017	0	1332.607469	0	1762.998931	1355.513883	1888.495134	0	0	1785.657953	1067.879093	2944.97245	946.8838345	0	0	0	1044.838837	1559.025589	1415.861178	1012.93611	0	1074.506179	2041.594265	3762.255626	3585.247768	4560.222456	7072.848651	6732.907128	8753.377205	0	4433.617332	3690.985162	2705.3868	5813.338486	2754.964418	2354.681537	5178.528732	2821.952422	0	3233.195102	1554.021484	1977.378576	946.85317	2386.097786	0	3204.165928
PI(18:1/18:3)	0	0	629.7231591	948.5515472	1049.499639	0	0	0	1576.959982	988.7353416	281.475311	0	0	0	0	0	0	0	314.888435	0	0	0	0	0	0	372.1417552	0	269.7736809	0	0	0	0	0	0	0	0	0	0	246.7632635	0	0	0	0	0	0	201.573015	0	0	0
PI(18:1/20:1)	235.7821785	0	0	324.3372137	173.7570191	274.4476786	215.4421105	0	911.7770961	0	0	0	349.330239	0	0	0	0	0	0	0	0	222.063225	0	0	0	0	0	0	352.4949859	0	427.3012884	0	0	222.3458858	0	0	387.9362999	0	0	0	0	0	0	0	211.2168389	0	189.7161039	0	0
PI(18:1/20:2)	656.2438888	346.173338	0	669.3565272	326.2387664	508.9179207	0	0	169.3274089	467.7457865	300.3402607	169.3095145	253.7237947	0	0	162.4975426	1197.120118	0	795.4736284	0	0	0	0	1001.109809	0	0	0	0	486.6712752	0	793.6368974	237.9013871	0	605.5598344	231.7971843	0	0	0	356.4756977	0	0	0	0	0	421.0357696	172.8705771	0	0	0
PI(18:1/20:3)	3158.694634	2349.876278	3123.606621	3865.522986	1789.682476	6326.765451	2372.519911	2955.881085	4080.1549	2429.49322	4692.602069	3804.799731	1553.75748	1892.613496	2141.968191	3308.106801	2161.080368	739.3855985	1170.887187	1439.213811	948.7611037	1038.735172	1114.825366	1163.981746	1117.011944	7443.902149	1710.380952	3480.645674	7261.052354	2452.066232	7828.308997	6146.040251	734.0946505	3859.521828	6781.586156	3296.073439	4421.999426	2802.248475	5216.113372	1705.223477	8451.345525	5173.872899	6297.720901	1479.469234	3359.770465	5546.066736	2492.899414	2298.106245	1355.590399
PI(18:1/20:4)	3503.00822	2469.27179	2289.166983	1918.939236	527.9238874	2279.512165	3301.58783	0	641.9421755	2095.072394	2308.137986	1864.064396	1034.579887	393.2233537	1862.313223	2246.750651	2582.003645	1053.254816	0	1047.002365	0	1458.308143	4201.498657	1448.137206	2883.162611	7765.246338	2041.980721	4968.088913	7244.646239	5805.581818	4592.293503	8435.650556	1645.786999	6416.275008	7516.573688	11277.30112	14572.59677	4828.971832	7996.181079	1226.272782	3400.417734	3857.598484	1321.988002	3303.248811	1211.722497	4426.757168	2853.797537	2205.459787	2866.156499
PI(18:1/20:5)	247.3390446	159.5488254	155.1154863	0	184.3188463	0	0	309.9942228	186.3613602	350.0271301	166.5115624	392.1131101	313.1857177	311.876732	331.4676986	0	257.3357088	0	0	0	226.7235397	0	0	0	638.3635398	0	0	642.8763101	321.3170563	321.1684754	0	293.8353038	0	287.1030406	399.9555615	0	278.5358051	190.9340888	318.9947569	252.8738551	0	0	245.0861768	303.0768648	157.7814217	231.2297292	177.8388581	0	497.8319757
PI(18:1/22:4)	1013.628297	1007.111362	2018.699857	1007.129323	0	988.1012086	0	1483.158905	0	1525.773407	1547.834884	0	0	0	0	0	0	0	0	0	0	0	0	0	0	0	0	0	2584.986547	0	1479.051126	994.3163382	0	0	1491.261757	0	0	0	0	0	0	1023.375596	1023.893771	1628.710894	995.9102014	0	0	2055.040328	0
PI(18:1/22:5)	833.6374898	1372.015838	1558.369844	1602.743344	1777.810374	1621.859722	1482.378711	3114.955842	1153.612632	1205.277098	650.8557299	1753.946316	2286.056587	1617.197199	1910.39861	1492.305929	0	0	0	0	0	0	0	0	0	2661.029124	0	2342.703734	2438.305625	909.1937494	1850.286057	1604.546266	0	2138.049958	1192.457796	1003.482194	856.6220638	2444.373765	1587.777993	0	2559.275104	833.942895	2382.821798	0	3907.193798	1614.422834	388.1591064	484.3493298	605.6831799
PI(18:1/22:6)	2663.953515	2697.05148	4021.247559	3552.710511	2220.824698	3175.151062	1851.005847	8021.372787	2282.660622	2836.931693	1454.175673	2947.126159	2603.266787	2679.724559	1413.448677	1300.081532	1851.0865	0	0	0	0	0	0	0	0	0	0	2240.316956	4656.421581	1247.791258	1946.757449	3060.982667	0	2086.026549	3996.393273	0	2158.696584	1587.45266	3375.639272	0	2124.935703	0	894.032614	576.2744865	1950.091136	0	556.2540699	0	1709.003697
PI(18:2/16:1)	314586.3759	252765.5291	349756.7236	258334.6531	242985.5008	297567.7007	273709.4442	372650.3649	244517.3798	238135.4314	242239.7601	271883.0355	353198.7548	262207.0313	304952.7538	287575.331	258764.8787	7418.199085	8728.127806	9842.088974	13341.05942	13819.10117	16798.88095	13055.49083	27994.73376	155787.8925	19463.40221	182991.2394	303943.8089	277919.872	302578.7635	351211.1823	27176.2229	235890.2553	293900.244	178653.0925	325148.5408	197138.9139	236934.2252	29824.29581	219153.6865	170248.6596	154024.3481	294263.0476	201385.0206	166972.4839	132288.7553	89619.70331	139013.5638
PI(18:2/18:2)	9602.95914	12375.65809	14862.22058	7286.318404	4768.440517	8521.571225	3780.578689	13938.06142	2836.333186	7263.844599	7544.681467	6550.796294	5560.206313	4435.510628	7033.875814	3516.343134	7484.422955	1031.18899	1012.535921	0	3584.683257	1580.64137	1191.69973	0	2058.555921	2335.655029	2503.623413	6078.596651	7525.17596	3720.77327	8405.825191	20972.20474	0	4431.159965	13085.40097	2385.560514	11054.76005	7087.130227	5579.781871	2510.913082	6211.428233	505.4437378	6414.052724	4280.687646	8408.662899	4966.465284	2106.737858	0	4188.871996
PI(18:2/18:3)	0	344.9905516	0	487.2791435	0	0	237.4711067	328.8654794	220.9322301	0	0	0	0	0	316.1451278	0	0	0	0	0	0	0	0	0	0	0	0	0	285.0217055	0	0	195.829495	0	336.2342227	496.2884976	0	195.8188281	0	0	0	243.8442398	0	207.6351057	0	319.7584394	0	0	0	0
PI(18:2/20:1)	0	0	277.2941406	0	0	0	0	146.3359486	0	178.8518769	0	0	0	326.8762707	0	661.6343976	496.0507873	0	0	0	185.9129729	0	0	0	0	0	0	0	0	196.6756907	0	188.2621833	0	0	0	460.4173167	304.4341681	0	0	0	0	0	0	205.6573531	325.6359867	0	165.9510665	0	218.9063567
PI(18:2/20:2)	0	473.4841997	288.8225978	0	0	0	0	0	243.5938613	323.6261344	0	360.4580987	233.4073907	296.5566574	0	0	0	0	0	0	0	0	0	272.694172	0	187.4953102	0	453.9157367	0	0	0	442.8218842	0	0	0	248.6600952	245.8480196	0	326.0168692	332.834576	173.3160139	0	337.2101684	418.3075387	157.016994	0	0	0	0
PI(18:2/20:3)	1504.715657	1413.089393	1192.193729	1433.897232	0	1663.973283	1661.955096	1744.157927	0	2199.693771	1200.818876	931.4354666	1111.434669	666.8236643	0	1566.52167	0	505.8243405	692.1834884	1189.03459	471.0512927	1181.997018	821.3068213	813.4292328	1374.57248	0	1127.086511	972.3746586	829.2838355	590.5925208	999.1995615	1226.314208	697.413069	1347.698661	1594.716806	1339.535849	2776.542366	804.2197535	1890.717464	544.1649555	1918.565233	2260.977501	1869.209351	3548.880855	1074.005255	722.7874446	488.8014462	622.6870027	1527.854469
PI(18:2/20:4)	15912.89454	24214.12147	28931.01776	20350.06866	22734.64806	22474.24449	22416.00353	28621.96949	24791.38197	14036.79901	16345.12284	19390.0336	12850.82757	23794.91033	10681.66356	11634.69492	15281.44748	0	0	567.4888546	0	0	1124.773541	2156.922882	2950.501889	9709.123252	1493.852751	31343.95613	67573.4405	19741.23871	17223.35975	17794.24609	3730.002833	10311.15668	27855.63541	16499.03188	17310.16961	12890.25729	15434.6963	0	10072.19323	5637.103004	7769.497703	19623.47194	13796.39552	5956.489241	6023.736576	7108.135434	7767.554448
PI(18:2/20:5)	249.7417205	503.4307215	503.4874687	748.2424563	359.4116195	408.3864714	504.895153	503.3408985	0	231.480646	0	711.9469426	0	180.3602322	953.5449612	0	465.7540985	0	0	388.4780882	0	0	0	0	0	0	0	0	0	0	0	0	0	444.3321962	0	387.7033521	267.4493591	730.3055484	0	347.7644199	0	0	0	590.344086	0	0	0	0	494.6109699
PI(18:2/22:4)	2222.020662	1479.33436	2373.851871	763.8652761	1129.164535	919.2499695	2824.995247	1148.3569	1241.474162	581.7679854	0	2767.38572	1001.789164	2430.254234	0	0	3070.802389	0	0	0	0	0	0	0	0	0	0	0	0	0	580.9017911	0	0	0	0	0	0	0	0	0	0	1448.266092	0	815.31103	2243.296985	553.0986448	0	0	0
PI(18:2/22:5)	829.5228271	1662.066295	2211.919513	1542.691766	0	436.496532	1746.706118	1010.12716	1675.042744	1113.780622	482.9206206	1308.785646	1492.66434	958.0983526	1587.973424	3152.000546	1230.540107	0	0	0	0	0	0	0	0	1254.55507	184.8252666	1359.250706	0	374.2271318	538.6664937	1172.517141	904.2517069	894.5116495	188.3322492	0	1210.053099	425.2226303	1788.410623	959.1218057	1018.89805	557.1894197	718.4222113	2369.631035	0	0	490.2832181	741.4809527	293.1717032
PI(18:2/22:6)	3120.834776	5416.625002	3001.210286	2926.391712	2253.571204	2019.142739	2406.928343	4534.66684	5550.101855	1797.02742	1814.97328	1723.572593	3685.535322	1649.324008	7450.749542	0	2307.837051	0	0	0	0	0	0	0	0	1530.047796	0	3363.122733	3537.76987	1820.75759	1370.898282	1866.12268	0	3023.3982	2193.459763	551.6517776	2716.91956	603.8153665	1931.95851	0	0	0	1128.68031	1399.47367	1314.126516	1347.857924	1670.92698	0	0
PI(20:0/16:1)	3600.947523	6298.399253	9214.81291	7585.910399	8697.829399	13527.62573	8062.376032	11690.02659	16239.84758	3863.825713	7930.442994	8920.051428	14792.3891	6791.775657	8679.678414	8015.006571	5166.74366	0	537.0589926	1100.1126	0	785.8272737	0	549.728482	0	1268.983971	544.9649073	5493.074857	3472.0063	4729.259786	5439.720405	7385.068687	1099.523433	9046.60346	10124.46275	4179.630099	1630.474904	1072.803828	3718.830849	822.6291131	3389.450529	4885.120494	4235.953561	3849.252541	7380.41079	3729.556267	2193.392822	3664.564757	2056.450548
PI(20:0/18:1)	55597.18422	66606.3544	80237.43763	71931.85196	61647.74612	96308.33545	69002.00938	102755.2569	98263.00315	39528.82604	64524.85716	61415.65217	122979.2478	45026.14389	66070.33641	86044.93081	49844.84251	804.8105869	1092.026202	259.767357	801.3981227	1353.802039	4855.586774	1622.090148	10409.9955	23392.96843	4864.125836	65542.13337	29007.48439	61297.2431	63522.75335	67139.71883	3699.806436	88742.24409	88610.58809	48487.64728	41439.27666	30924.6955	38849.89839	1355.668447	78265.10496	36758.03863	33332.96153	43542.17851	42499.03032	21285.37612	21781.737	17812.21434	20272.61388
PI(20:0/18:2)	27572.11799	20813.89973	21607.24263	21485.56571	12532.31421	34965.43753	18554.93047	22719.71692	17857.61065	16362.16278	16997.53218	18432.70682	32291.46032	16538.88412	22912.18965	32260.1317	14515.16338	536.2832699	260.4824253	1339.613809	1074.069369	1868.20115	1048.489074	224.6772944	2146.308075	9760.032983	1453.93829	15201.62064	9971.659275	14098.49169	15005.37755	35663.51474	0	15037.18296	23735.3879	8065.302719	14981.35778	4857.025438	9061.912916	1342.194641	8869.297735	6065.070399	7837.273872	15451.51742	16979.51978	6983.444222	6422.142667	1387.369403	6661.073286
PI(20:0/18:3)	0	0	0	1059.888027	0	0	941.5552141	0	0	1242.820114	2290.442225	0	0	0	1330.347981	874.1348198	979.4531525	0	0	0	0	0	0	0	0	0	0	543.8029091	0	0	0	0	0	0	0	0	0	590.6429941	549.2300439	0	0	0	0	0	0	863.0293975	0	0	0
PI(20:0/20:1)	4101.963263	8602.555463	0	4716.301497	4153.952567	2716.503807	5889.286905	2852.167185	10617.78198	0	1955.78232	1932.666228	6522.415389	791.8391119	4172.945954	1383.469924	1053.201459	0	0	0	0	586.399552	0	1132.233506	897.3226773	0	0	5106.816049	1254.474341	3476.767094	4309.44096	2958.280306	0	3032.475447	7423.399882	1154.678863	2279.175007	6202.645334	3294.606299	0	5938.926333	3061.911205	1227.826324	2320.630769	2537.855066	2843.935781	0	0	2699.182751
PI(20:0/20:2)	4712.668408	2043.979929	3377.644866	2429.470933	1378.333775	2596.566404	3131.032056	868.1801407	1827.722928	2711.542544	3203.632148	919.2499248	1731.856839	2724.50534	0	3248.14867	2232.405157	0	0	0	0	0	544.9278467	0	0	1058.204148	0	550.2192316	1125.534748	1802.745373	1824.517003	4201.190189	0	1371.908871	2759.92524	553.4048426	733.0854624	1851.557697	1110.003585	0	1058.599445	0	598.0097473	1158.291656	4778.832922	0	0	0	859.9044865
PI(20:0/20:3)	791.741976	0	1267.208812	2306.279357	1733.494778	1674.628815	1461.896645	3888.151326	2453.461976	868.1623247	1684.350511	4177.182254	4005.546236	1011.345705	1717.636303	2558.689497	1450.560759	825.404482	0	0	985.1951351	0	879.1619626	544.9499365	0	2160.197654	0	1416.190061	3542.554534	929.4690523	2257.325298	1317.254354	635.4965355	2557.235317	1925.616406	847.2816382	1337.228147	0	2031.740156	1310.923546	746.9518651	746.8019384	2301.929637	1147.670944	4105.415437	0	858.7589694	0	449.6972805
PI(20:0/20:4)	1755.783176	3319.954358	17944.98689	8172.787218	11809.79528	9507.542976	8232.70717	8848.929154	4600.406045	5567.561129	5321.359394	2836.576385	12117.10094	8787.050123	7361.785099	12587.84987	8229.087935	0	702.9472619	0	0	0	605.7907239	0	0	6006.532535	0	6202.604716	6424.898183	9937.803937	6356.386979	9880.040994	0	15357.30697	3551.922718	4004.379681	3379.864413	0	2206.813253	0	4334.819626	3633.408875	3742.188691	4161.563881	9375.144639	4270.376945	1299.411141	658.9471203	2088.007485
PI(20:0/20:5)	0	0	0	1185.471378	0	1533.539454	0	0	0	0	0	1563.371133	0	0	886.6853606	0	0	0	0	0	542.6649987	0	0	0	0	0	555.3018658	547.9781046	559.8457369	0	0	0	0	0	1328.24525	577.3555755	0	0	0	0	629.7180219	0	0	887.2815922	1441.023725	0	0	0	0
PI(20:0/22:5)	0	0	0	0	0	0	0	0	564.2703453	0	0	0	0	0	0	0	581.8471847	0	0	0	0	0	0	0	0	0	0	0	0	784.0237634	0	534.3526395	0	0	0	1079.124729	1133.844574	0	739.0234165	0	1631.853067	0	0	0	0	0	0	950.4995396	0
PI(20:0/22:6)	0	1496.758025	0	0	1762.594351	1031.989373	0	1713.320896	1166.956763	0	0	0	1517.80595	0	0	2382.066225	0	0	0	0	0	0	546.7994225	0	0	0	0	0	0	545.5584943	535.5075527	911.1951912	0	0	0	0	1110.681902	0	0	0	0	585.3919757	0	0	0	0	0	0	0
PS(14:0/14:0)	0	0	0	0	0	0	0	865.2150155	0	0	0	588.0670898	0	0	0	0	0	0	0	0	0	0	0	0	0	0	0	589.1150225	0	0	0	0	0	0	0	0	0	0	0	0	0	854.3858381	0	0	0	0	0	0	0
PS(14:0/18:1)	497.3618751	490.2917497	0	0	0	0	0	497.2659369	0	729.4996289	497.1824752	257.935392	233.4956186	483.5449665	0	0	745.8742484	0	0	265.8617775	176.2351097	0	0	660.4994698	590.9401584	809.5501495	0	1061.449318	654.46789	461.1242351	0	524.2509777	160.706778	247.3470663	793.8408249	635.0800477	0	538.9414138	0	0	556.9716968	814.4923762	756.9758001	2725.569712	788.6090351	143.4815141	0	0	301.504733
PS(14:0/18:2)	6673.998162	4065.201954	7565.423865	4145.885692	4360.434945	4934.524311	7262.015002	5528.185011	4336.434617	3416.189661	4614.656129	6145.337302	3636.549801	6076.451113	6953.105164	5205.671357	5501.451677	0	0	0	0	0	0	0	0	2890.666226	0	1727.284909	5033.634526	6388.012422	3536.533414	12213.66536	0	2048.422619	7964.647738	886.9406413	6077.140554	1631.680814	2949.386035	0	3803.289015	2912.531716	6569.112208	6056.035525	1323.241079	589.8927235	1178.218477	585.0321372	2651.078653
PS(14:0/18:3)	0	0	0	0	0	0	0	0	0	520.2983888	0	0	0	0	0	0	0	0	0	0	0	0	0	0	537.1941959	0	549.9885007	0	0	0	0	0	0	0	0	0	533.7382699	0	0	0	0	0	0	1014.637938	0	364.7773706	0	789.8715727	0
PS(14:0/20:1)	0	0	0	0	608.9315021	0	0	0	0	0	924.396531	0	0	0	0	0	0	0	0	0	0	0	0	0	0	0	0	0	0	0	0	0	0	0	0	0	1452.998865	0	0	0	0	0	0	0	0	0	0	0	0
PS(14:0/20:2)	574.6313982	589.7752967	551.2217576	0	0	0	0	0	0	0	0	0	830.9445921	0	0	0	0	0	0	0	0	0	589.8630214	0	0	0	0	0	593.119857	0	0	0	0	0	0	0	0	0	0	0	586.4917542	0	0	0	0	0	0	0	0
PS(14:0/20:3)	0	934.1905901	3502.235834	2355.471245	0	2047.956053	0	0	1007.111361	0	1005.929829	997.1956757	971.4912258	2509.262816	0	0	0	0	0	0	0	0	0	0	923.3855009	2060.139181	1012.187697	912.3097847	0	2874.166494	1008.323909	2043.799199	0	1015.518241	0	0	0	2023.091024	0	0	0	0	1020.201254	1044.44434	0	0	0	0	0
PS(14:0/20:4)	14183.05839	9047.158036	17721.23567	15077.4478	1705.55993	14136.96545	10557.93247	24215.01199	11156.0002	11135.15828	7785.965749	8881.441249	8144.59753	7376.701306	11051.03955	9958.09294	6845.999421	2070.864867	0	1513.373555	2248.632238	1041.648266	999.4863194	502.1574374	3502.725903	2420.786346	3632.29689	5603.72966	11083.03993	9592.424027	5981.284875	5057.730212	3034.681425	8851.654454	5570.119144	9903.533607	3478.513977	4132.770869	2389.670364	3861.786217	7737.034577	4599.766013	9756.809057	10291.56826	9024.854705	8139.437602	2835.246808	4412.331101	6041.700032
PS(14:0/20:5)	0	1002.683261	2954.489799	0	1537.835647	3501.034691	2308.46408	3131.580409	1044.159864	0	2537.993154	2048.493055	0	0	1596.379165	2562.390848	0	0	0	0	0	0	0	1015.933617	1505.817652	0	0	1042.869912	0	0	0	2060.792396	0	0	2037.819041	1012.949096	0	0	0	0	1039.700658	1026.976318	1561.311105	0	1555.284299	1004.688523	0	0	0
PS(14:0/22:4)	0	0	1959.474354	0	0	1426.73493	2020.13135	1342.751715	0	2632.775802	983.7276107	0	1542.958418	3091.147018	2020.645055	2047.740789	1526.322406	1546.01048	0	0	0	0	0	918.3288024	1014.997756	0	0	1519.278725	3465.317826	2565.327623	3547.632679	2055.023644	0	1022.626826	2061.628464	4063.765124	0	0	0	1002.427083	2594.713906	0	1511.327088	1373.126949	0	909.0146497	0	0	2029.336044
PS(14:0/22:5)	853.9443075	0	0	0	242.1939848	0	253.1410501	421.5926572	0	0	280.1409467	525.2218502	0	0	326.9980854	249.908535	0	195.3745419	0	0	0	368.3358618	0	0	0	0	0	0	0	0	0	325.0238083	0	0	0	0	0	0	0	0	479.7582273	690.60501	339.0506228	1087.455868	0	0	0	216.5184703	0
PS(14:0/22:6)	0	1555.768544	1058.43218	2029.404759	1996.992608	2940.314475	1501.320172	1929.488463	1673.941826	0	0	1627.862591	1809.083893	1102.183429	1006.139428	0	2040.60334	0	0	0	0	0	0	0	0	0	1929.584697	0	0	0	0	1298.314861	0	0	1474.687306	2581.088908	0	2327.808993	2209.167339	0	0	1467.102178	0	0	0	0	0	0	0
PS(16:0/14:0)	582.3472448	0	0	0	0	0	0	0	0	0	0	571.8567394	0	0	0	881.6995588	0	0	0	0	0	0	0	0	0	0	0	0	0	0	0	0	0	0	0	0	0	0	1053.034085	0	0	0	0	0	0	0	0	0	0
PS(16:0/16:0)	1156.64773	881.5299355	4632.362781	1330.864476	1469.763151	2643.82853	2056.1767	4114.962198	1163.858694	1457.379913	2033.587538	2900.438397	1985.801901	881.6535946	1751.371412	1731.019088	0	0	0	0	0	0	0	0	0	561.311282	0	1559.371941	522.6829327	0	1726.713898	1287.399302	0	519.5306426	1530.2758	419.7561032	0	0	0	527.1403925	1152.911648	567.8128837	0	1177.196915	3176.849669	855.8425548	0	688.589884	0
PS(16:0/16:1)	0	574.9736367	1130.946612	0	0	588.0950258	0	0	0	582.4093361	0	0	588.1043447	0	0	0	1454.508757	0	584.0706482	0	0	0	0	0	0	0	0	0	0	0	0	0	0	0	868.155046	0	0	0	0	0	0	0	0	0	874.2748555	0	0	587.5587776	590.2840671
PS(16:0/18:0)	8598.991972	23900.19327	36318.02306	17670.14532	12897.32833	10524.66686	18495.51225	54560.58341	12689.95787	16159.99451	13748.5772	8649.850937	30787.47887	5122.002568	19778.21258	19249.25432	7948.839265	1049.796843	5724.745291	1042.954168	2496.873008	513.5490256	4167.694006	2087.101494	7268.197454	21204.50126	4059.87573	8524.687626	10691.15698	12030.67963	19797.94658	17205.98082	5748.664206	34786.79816	38655.85302	12892.00812	13424.72459	6090.812722	29986.85387	1042.823366	14262.49413	4112.873324	4066.235556	10468.11301	13909.90066	14338.4284	4767.71282	4199.485697	2862.521841
PS(16:0/18:1)	5955.27949	2020.672877	8182.563016	1583.843732	5468.453883	1227.818612	8246.427881	4481.263842	602.3043575	1562.561341	4049.997288	0	1426.985657	1911.998975	1971.246325	2630.643696	3774.229766	1052.731964	0	0	1054.126969	0	1023.15925	0	0	1612.879958	1050.04596	1051.15262	3998.894587	5389.853499	2392.309749	12887.85818	0	4057.896079	4035.82481	1545.436864	2617.551338	2634.676334	0	0	2451.792971	1542.051154	3538.665588	7361.903351	1466.030067	2828.237153	0	1847.724901	2458.884517
PS(16:0/18:2)	6014.437912	3208.293306	2677.641025	3160.634068	1985.183873	8854.505307	3515.805915	4530.382793	4077.797069	3455.113272	3377.88673	5922.871361	6475.557397	1497.077891	5069.686132	1474.959648	1695.404748	0	0	1077.896144	0	0	0	1009.839471	0	1569.865458	0	2195.914642	4025.344305	2242.843686	3095.844661	2009.105101	0	0	5438.641931	1493.337746	2034.859737	2013.937773	1532.733812	1514.502123	1873.392315	2026.873606	0	0	2396.069201	5410.906811	1771.902966	996.806527	2490.152061
PS(16:0/18:3)	0	1170.39893	0	0	0	0	0	0	591.3684451	880.493831	580.7832798	591.3055743	0	0	0	1111.48572	0	0	0	0	0	0	987.8237349	0	0	0	0	0	0	987.3626172	0	0	0	0	0	0	860.9865352	0	1843.563669	0	0	0	0	1227.621567	0	0	0	0	0
PS(16:0/20:1)	0	1496.108263	2733.053794	0	1041.662624	897.3402177	1246.908038	997.1814516	1235.056489	1264.858198	4675.191292	0	3729.308396	1102.188091	0	1374.259917	999.2692742	0	0	0	0	0	0	0	0	1926.001263	0	0	817.5503576	0	1113.559898	0	0	0	0	0	0	0	0	0	0	0	1409.795767	4182.336746	1517.937371	1502.968006	0	0	1004.88017
PS(16:0/20:2)	0	0	0	0	0	1040.709011	0	1151.718795	0	1367.18615	1107.655433	0	0	0	0	0	0	0	0	0	0	0	0	0	0	981.5273226	0	0	0	0	0	0	0	0	0	0	0	0	0	0	0	0	0	1585.583838	0	0	0	0	1264.145692
PS(16:0/20:3)	0	1123.211068	3633.00702	0	1992.464673	2866.112313	1570.820968	0	0	1692.832604	2389.303964	1567.235719	2324.6654	1026.023786	0	2598.737496	1580.904947	0	0	1040.945694	0	0	0	0	0	0	0	0	0	1974.292052	993.6325239	2321.069396	0	2853.12136	0	1043.816503	0	1041.966036	0	0	1047.136554	929.2690708	0	0	0	1033.826473	0	0	0
PS(16:0/20:4)	12680.68917	5936.766471	25609.74489	9382.582946	11783.61673	23359.8521	8332.459141	22142.79152	9868.248688	28405.12767	17912.53192	14972.11671	12564.07537	7922.472233	17529.58109	20404.17492	8094.409155	2083.904061	987.5520154	1009.240446	1035.540804	500.8312636	492.4764174	1038.99263	2150.88688	2595.1896	1126.409611	6963.561204	19329.17818	19332.29602	9567.638206	14824.81084	0	12585.94636	10836.89315	8006.366103	6223.34942	2083.337046	7819.664851	5203.666915	3086.138469	2766.03641	5740.038046	7620.124244	9078.830975	11605.9521	3601.894223	0	3096.604753
PS(16:0/20:5)	998.2153294	1519.581058	2054.4047	2069.971718	0	1562.480046	0	2316.913673	0	1584.910433	797.7996655	4139.273929	3633.875301	1516.884951	1544.114521	2184.99332	1033.635461	0	1561.513564	0	0	0	0	0	0	0	0	1550.413635	4155.63613	1498.399211	1019.950409	1380.870721	1455.737069	1550.490541	942.2487793	0	0	0	0	1044.829943	0	0	2575.817921	0	0	0	1026.73471	0	1527.027335
PS(16:0/22:4)	1196.115167	0	2546.411062	1021.191592	1211.970909	1519.419479	0	821.9483288	999.3523053	1098.277748	1648.376021	1652.29187	0	1085.87979	1009.884784	0	0	0	0	0	0	0	1054.867027	0	1813.296833	1030.132308	0	0	1067.199442	0	2347.118649	0	0	976.9796255	1020.232032	0	0	0	0	0	1029.2501	1547.267479	1035.088583	3617.004988	2154.774146	0	0	0	0
PS(16:0/22:5)	0	1034.468217	1901.309442	0	998.6051528	1874.093789	1005.231343	1871.213583	996.6848396	3139.849511	0	0	1384.813422	0	1804.99671	969.6083862	718.5978986	0	0	0	0	0	1039.440702	1039.452181	936.2708006	0	0	1522.872877	2145.581194	1710.884718	1533.259155	1910.088772	0	3168.745669	1516.890129	734.7881234	2089.106787	1541.998793	1785.690866	1502.825457	0	979.3769182	1562.121662	1580.853389	0	4071.494874	1815.777443	0	0
PS(16:0/22:6)	0	0	3992.952267	1494.031842	3552.542373	1818.167176	1502.385091	1000.167085	0	1212.084472	0	1557.054097	1814.562125	998.5391263	2370.919059	3998.908783	1910.531009	1017.457623	0	0	0	0	0	0	0	0	0	0	0	0	0	0	0	0	0	0	1276.179629	1106.361869	1233.855223	0	0	1028.876404	1015.390005	0	2089.824165	1578.413153	1030.407199	1799.123466	0
PS(18:0/14:0)	0	0	1211.969385	0	1006.996319	0	0	2299.367373	1509.912086	0	2021.033937	0	0	0	0	0	0	0	0	0	0	0	0	0	0	1547.566851	0	1016.104739	0	0	0	1501.973946	0	9074.338146	1521.893024	1008.684422	0	2529.931116	2031.385717	0	2062.419474	1536.440136	0	0	3495.819288	0	996.9206271	0	1494.707102
PS(18:0/16:1)	1539.039879	2551.799162	2033.37976	2507.39276	1801.196688	4375.075564	0	2952.785435	0	0	5086.728099	2835.86723	1017.05869	2548.354472	2559.203326	1670.551262	2051.203223	0	0	0	0	0	2543.531638	0	940.1305141	1950.543628	1027.092541	7322.603542	3050.6976	2557.123151	5140.941328	3863.497067	1039.964062	15056.33991	6891.123163	4887.362908	2610.549383	1036.069819	9944.610637	0	5573.410115	6159.430347	1025.666121	1962.129663	9024.198415	1709.240936	1997.244512	4472.483259	3262.443725
PS(18:0/18:0)	211526.6347	267395.8636	651397.3233	230640.8893	699785.3233	485619.5959	294393.0268	562849.3273	650151.2119	527040.9586	670206.4914	336867.2116	546342.3181	243195.5559	453210.7343	548380.4298	171813.6757	51676.69627	56148.2029	31028.24148	72435.9371	32949.46173	157453.6208	33161.42255	77746.56676	353211.4891	128291.7646	861340.3139	226086.7199	485497.8507	697091.2793	412721.4731	56999.78601	1408939.276	460458.1782	833736.1273	162587.2561	1093285.899	1125843	28291.67976	467508.5733	865117.0652	358362.2561	599141.8031	900565.5113	590810.6548	337987.7991	297934.1267	254545.7111
PS(18:0/18:1)	45027.26432	41854.47406	81723.68945	69383.04297	83307.81837	89669.90152	57063.21884	99087.81214	104782.7245	65794.60044	127142.2817	62958.8831	73761.62103	47422.59507	85936.08716	97309.76285	23151.99156	10375.80733	3460.972545	8795.691799	12193.76013	16547.59578	38260.35661	9294.490391	29998.92824	32008.78098	7299.786041	161118.5728	26587.70114	57405.94521	133676.0148	61836.28028	10411.29222	214837.0427	83014.48462	72131.25565	17157.41982	81288.87296	69537.39766	10425.22571	68300.07949	84380.14547	29251.56297	71474.85686	92182.15226	46623.10711	30863.83899	56694.07533	38860.09055
PS(18:0/18:2)	10501.1791	7328.305335	18641.67771	8268.856838	10032.46721	18555.88174	11422.29482	20881.67411	15474.71117	24096.11187	10661.69011	13399.7875	25811.74343	14983.94303	11169.26385	28059.66261	15509.65057	948.0376035	1035.366116	1022.226771	5658.767943	1552.270755	3084.219848	1039.964417	4626.126535	14124.41751	4147.573801	10960.69875	10480.34304	11899.29375	15298.37926	24322.76804	4161.514469	22269.15673	30612.46726	7764.998396	12595.60486	8164.096525	14991.0087	3065.746222	14382.74888	10543.2254	6800.638785	18254.78375	15848.80877	6225.699173	9110.813277	2687.33143	9720.400339
PS(18:0/18:3)	647.5726519	627.186679	826.2153547	1876.121055	1085.176441	1648.430195	1078.713104	1171.859566	854.7456856	1143.441115	1067.347434	771.7589714	1812.907095	768.2094601	1020.544888	1198.881875	539.7352896	1204.184483	1027.574004	1660.257225	596.8471403	1776.835474	790.7107847	1525.897714	1124.276652	2726.050294	1762.20236	761.0245098	1533.006098	1004.423273	725.5901631	1243.684555	1772.370688	1432.725583	2823.103631	1315.047575	1420.697967	1329.024709	1466.262115	1729.175557	3883.766953	1625.917714	1507.881108	2079.609137	1349.040659	2969.511084	1970.177002	751.1139774	1624.797769
PS(18:0/20:0)	0	383.9792062	0	0	1827.633138	1442.674903	320.4350324	1760.153065	869.2681323	0	0	0	672.0879134	1078.242764	1248.219724	420.8846154	1306.068068	1319.99953	873.7589944	1156.607276	882.4713559	4364.566621	3066.262337	1460.076608	3493.854318	65968.23693	3437.455255	28580.28925	53304.31019	44653.38018	60054.13477	51372.79363	7191.235975	88594.24286	59405.35539	41943.64989	43149.00082	17404.3917	59815.56252	3496.384061	23070.57114	24827.24269	23384.08006	28003.52822	111478.8493	28636.0815	13602.8282	25086.95546	36884.02297
PS(18:0/20:1)	1565.510434	3129.308903	3647.0068	5177.068507	3128.184158	2086.573064	3132.082099	4174.166716	8852.23969	5218.460307	5689.287168	1566.849975	4173.647662	2088.716106	3129.008739	7243.508274	0	0	0	0	0	0	0	0	921.9244461	1558.950253	0	3648.466552	4171.627971	5213.96305	4689.353246	1817.499473	0	3129.16788	5211.891883	3641.34644	1564.571494	4539.702628	5213.523567	1013.992003	6251.827403	4145.369636	0	5099.774977	5181.257166	2598.78579	2067.739833	1550.708347	2076.317864
PS(18:0/20:2)	1044.299775	1009.984599	3630.777145	0	0	2193.646168	0	2083.643776	0	6253.631407	5425.629296	0	5209.031636	1565.639855	0	3644.167642	1046.295015	0	0	0	0	0	0	1559.651422	0	1047.190337	0	4164.765954	783.6656671	3126.859754	2441.674301	4692.55001	0	0	1563.391666	1043.488603	1044.159048	3646.681421	4162.358514	0	0	0	0	3647.999991	0	0	0	2047.104716	2071.188772
PS(18:0/20:3)	742599.1197	1032425.624	573095.8678	1265832.727	825773.4037	1123296.015	946204.2342	942489.9942	1023169.884	934103.0801	1171419.093	810985.7108	1000667.963	838337.9818	647067.7345	786623.7767	910047.1098	87645.92627	104918.5908	131339.5612	162016.831	144230.3228	188253.5779	178589.7486	154248.0934	464712.9801	259326.0429	356684.8799	509251.9548	594945.1426	522415.4369	571029.4305	326932.8657	509772.1083	419791.8384	366709.6844	598697.3733	364099.6247	554779.8656	253977.565	594999.9442	153516.894	107462.2106	280582.1918	223399.5987	230227.6267	150427.1962	226645.589	268449.411
PS(18:0/20:4)	20757.79807	22685.7173	52831.24274	18051.16241	15844.90658	34551.08849	19106.95449	35461.33887	19395.68519	63591.67833	19055.81657	21700.97466	22837.64647	15715.91577	17048.3383	46903.5908	19138.21877	0	0	1563.598641	0	2086.019406	3646.522158	4686.447458	3075.108083	10231.51086	5221.479318	7792.72816	19725.30078	16529.50384	12090.09574	21690.50235	0	28300.91167	21957.26259	16098.33014	21253.08407	5619.668898	9019.316279	1795.816647	5079.14064	4604.909266	11908.46952	11685.82372	4555.709897	14061.72371	3975.13644	12511.45955	6748.986719
PS(18:0/20:5)	3363.733559	0	0	1229.685298	1175.036826	1828.471231	764.2999989	1063.951463	946.5103612	0	635.27438	0	0	0	0	0	867.6886951	0	930.2667378	0	0	1290.773562	0	1884.017009	1248.150278	0	3020.788646	1499.802329	1426.09492	1747.734628	1811.171307	956.9714753	0	1098.901129	2238.810168	2386.644458	1248.09154	3037.353633	3312.101147	0	1013.624903	847.5300589	1005.820964	2578.050516	1103.094871	1155.929432	833.2851967	1648.291694	918.811547
PS(18:0/22:4)	2322.302427	4028.105465	3215.6641	2828.439098	3941.128548	2766.200216	3211.206782	1932.021177	1350.435665	3031.36783	3609.762562	3018.189941	2944.401324	1847.626339	692.4654419	3573.127996	1613.045932	799.3017925	872.9540784	788.3978427	1332.723895	2053.720366	1032.418923	766.021624	983.4263231	1952.955358	787.7034866	1621.843557	3114.343673	3574.509151	2294.703815	3088.022235	1258.38751	2536.451835	1197.120176	1444.966415	1527.768476	3078.7284	2555.77185	1661.511457	1684.26877	1275.403109	840.0363034	835.2913761	2078.626821	3135.12394	1182.878356	2465.721421	1497.406738
PS(18:0/22:5)	58189.76061	63010.83616	56858.14543	57948.34478	42976.03044	52492.75862	53397.98286	61297.28242	70859.86634	62425.26718	53928.78183	46023.34704	67405.84307	98798.141	54679.06287	99511.22837	104940.035	15071.68878	16772.75759	24167.28004	16935.99363	11881.55262	11686.70384	18863.26355	30117.9834	41925.80453	27884.04401	52536.15836	67097.77915	56414.30547	47950.80759	60317.40963	21561.75176	75837.18446	31061.6148	57282.1855	36096.25992	39453.68354	63172.36074	61735.2114	35097.05495	32056.53618	23417.31898	42452.97469	30151.24541	22349.35225	18395.27879	35987.57159	51517.78659
PS(18:0/22:6)	2965.359269	4172.207542	9566.319103	1567.352839	2600.254725	2982.580291	3302.820068	11886.40619	3237.76399	1579.701959	0	1515.19162	2202.438203	4188.890491	1530.128438	7130.120779	3615.029413	0	0	0	1043.486967	0	0	0	2066.488891	939.5575962	0	2086.507909	3638.529759	2577.745454	1868.99287	4382.422137	1020.152857	3129.952731	2630.171258	0	0	0	2606.490777	0	1503.266349	1031.922478	0	1263.168664	2076.612951	0	1521.370485	0	0
PS(18:1/16:1)	8076.447694	2240.074852	16371.9093	4273.655744	11413.77412	11017.31938	10908.29209	8526.300141	6614.249698	11128.81659	9733.92121	6201.780257	4179.061338	4728.48274	6107.255641	6515.008926	1826.533773	3150.335563	1563.569377	0	2560.405705	2019.800416	3388.52167	0	4608.739908	5044.523458	2940.203454	7671.618617	15056.72594	10172.15523	7810.716626	6853.305213	1459.211993	10034.10413	6755.652582	3513.539497	7876.315344	1470.179928	4103.443925	3230.421743	8201.98391	2453.466863	4322.268671	10240.06493	12224.3163	9424.569325	3927.226796	2932.226967	5151.694661
PS(18:1/18:1)	1290.366527	5056.221015	2264.707535	5639.970819	8104.487788	4980.218668	1033.752003	4365.500124	3300.469218	18464.43554	5801.74841	4410.487923	6000.277665	1865.226162	5573.714831	729.3921914	6597.630682	1563.009698	0	0	1019.707032	0	1041.037234	2040.704645	0	3821.200584	0	2591.373104	6746.477019	2588.020853	5692.61704	8880.804234	0	7286.597738	5142.197616	9850.644499	6462.643937	3136.440011	2620.418295	4059.471259	2584.254956	2063.2048	3603.003355	7778.305817	8600.209543	1418.973751	5309.761889	0	983.9374599
PS(18:1/18:2)	24112.68393	24263.53447	27053.50699	13287.76125	13273.06453	16435.30888	8335.587216	26416.19056	8896.606803	19608.69121	12084.35381	32792.67625	29719.22518	18498.19704	17608.6961	12771.28602	6298.112492	1012.419402	1525.766962	713.6784545	2533.218334	4894.245459	490.3764339	2244.210083	1377.92767	7504.108152	0	13299.14031	20839.56106	4525.037461	11170.71399	24466.74501	1409.029186	21901.57288	21971.8562	11676.2264	23062.24336	5158.291266	4556.769753	6022.910576	4962.521234	1154.081326	11524.10829	7556.83299	12110.9451	10562.99863	3158.851847	1049.952339	4210.680258
PS(18:1/18:3)	0	0	0	0	0	0	0	0	0	0	0	0	544.2491661	0	0	0	0	0	0	0	0	0	0	0	0	0	0	0	0	0	0	0	0	0	0	0	0	0	0	0	0	0	0	0	0	401.6646145	0	0	0
PS(18:1/20:1)	2110.16077	1030.092329	999.4651542	1049.792262	0	1514.292336	0	0	0	0	0	0	0	0	0	0	0	0	0	0	0	0	0	0	0	0	0	1452.734803	0	0	0	0	0	0	0	0	1563.042791	0	0	0	0	0	1030.351952	0	0	0	0	0	0
PS(18:1/20:2)	0	0	0	0	0	0	0	997.1941525	0	0	0	0	0	0	0	0	0	0	0	0	0	0	0	0	0	0	0	1010.459868	0	0	0	0	0	0	1040.436808	0	0	0	0	0	0	0	1034.723234	0	0	0	0	0	0
PS(18:1/20:3)	3526.419397	3972.058016	6223.583765	0	2679.740495	6510.239914	3645.60454	9374.687823	1695.680331	5481.614357	3520.365668	4096.196653	3298.561736	2483.558991	5201.376777	4408.373963	3105.151624	0	0	0	1041.656496	0	1042.855565	0	0	1655.139501	1564.450442	1797.59243	2039.008923	1488.731823	2550.339078	8341.321168	0	4512.649951	4301.778106	4320.982023	0	0	1310.507642	1017.28901	3649.812007	1014.496276	2589.342171	6073.263997	3945.631912	1486.806859	1819.044657	0	0
PS(18:1/20:4)	56673.98877	68791.15811	218259.7793	69160.41544	72914.24284	114255.6376	61414.6981	138839.6727	50976.0494	129066.973	88187.98048	61520.595	74347.44433	34292.76955	58595.09846	108015.8229	54918.31984	3125.726138	3436.370594	517.39508	1042.954123	2084.971201	3419.922255	3645.236987	10785.41077	25867.70853	5197.37103	36168.19166	54003.96125	52088.62967	41245.73637	74281.15685	5735.827959	51435.50136	64926.85839	44668.03108	31567.08636	10265.48861	24973.77867	10336.16168	15260.60991	15387.3646	42754.1711	38250.54581	49545.73171	40660.04541	6119.055459	16446.95492	25612.68548
PS(18:1/20:5)	0	0	2588.872862	2788.131499	5208.12013	1535.896904	1613.164604	7266.027589	4172.95904	1230.618606	0	0	4691.253017	0	2084.504203	1037.91053	0	0	0	0	0	0	0	0	0	1530.452915	1015.671677	1561.577154	1030.454609	2605.28248	949.3465893	5431.537925	0	3128.234285	4171.28548	2587.441691	1565.97567	0	3124.545514	1548.308265	1044.170595	2591.737087	1405.533485	2081.027211	5211.080095	0	0	997.2454592	0
PS(18:1/22:4)	5727.080483	4015.386172	9865.034942	5211.313991	5211.670735	8060.346961	4701.897928	12512.93455	5007.360288	22655.48598	29654.21389	7820.567591	3366.633953	5739.754027	4505.283272	6907.299321	8877.805591	0	0	0	0	0	0	0	0	0	0	1492.239736	0	0	0	0	0	1025.982428	1132.72431	988.3455773	0	0	0	0	0	499.1890691	4668.30205	5179.002153	6238.495241	2653.904144	0	0	972.239543
PS(18:1/22:5)	3751.787689	1598.710508	5906.645027	3895.735712	1654.326157	1741.270905	3333.16618	3659.58169	9896.160068	15281.91687	13293.69096	2093.432138	3657.38391	6087.348653	3672.663016	7870.550411	4698.945217	0	0	0	0	0	0	0	1056.878015	2610.579423	1031.093287	3849.31051	6778.826302	1513.355928	4480.529636	3181.853589	1555.698109	2960.92301	7288.388633	1529.433648	1562.54461	0	5094.556803	5743.840773	2607.495564	1813.223815	1030.29591	3364.968587	0	5342.437084	0	0	1069.494364
PS(18:1/22:6)	8691.390588	13381.57583	29513.34534	8366.377568	16048.28849	11491.26798	12187.81547	22125.08432	8900.586618	11521.35509	5325.96965	8778.038677	8426.553164	3025.522127	12397.50306	14457.23939	4083.925852	0	1530.888041	0	0	0	942.2891176	0	1522.638598	5067.408737	0	9831.177237	3130.745821	3115.116686	8628.363875	13705.15499	0	11847.54412	11541.37645	4677.332137	6243.502733	4110.487438	5543.021176	0	1203.314837	4677.649702	2519.004846	5252.1394	8366.780058	3481.340602	0	0	2328.43033
PS(18:2/16:1)	26972.23685	21039.36693	32545.46579	9833.284305	10738.49169	26944.1015	18497.35512	33008.00937	15366.02072	43663.077	43245.93119	20443.51228	28570.67152	24059.10886	30058.25432	25215.57854	20313.77662	1840.750532	5899.468342	0	7263.491925	3221.092292	6579.81143	5537.377336	14987.08828	10632.89909	2775.105638	27324.92975	23989.19673	11624.01844	13538.4852	26305.55081	3639.023081	18817.05874	35173.35661	16886.08185	17187.47202	14402.18801	13413.66444	11208.12373	7510.478023	19130.10273	14223.5366	11710.04665	14710.87116	21933.70174	7153.559531	6323.116889	10787.75243
PS(18:2/18:2)	37030.56454	26184.17705	25470.44158	24588.957	27525.27078	38621.13546	26138.36422	19821.79376	26078.63497	31615.57526	31351.84155	38749.48018	59553.57254	20622.01498	21234.2757	26280.57435	32643.41632	1241.523728	2412.414216	2604.89556	5948.911748	5687.415385	9639.801218	8851.580302	11575.19822	35371.54398	2071.70982	32222.04257	24730.51519	58010.54367	47966.17648	42249.94022	2596.774941	61484.36583	41693.56257	24881.26516	55785.69448	17713.51645	17735.87073	16956.28279	31034.07525	16163.46854	18520.84158	19949.22639	17032.08995	17934.10862	10790.59047	8770.699546	17259.67134
PS(18:2/18:3)	0	0	1917.074866	0	0	0	0	0	0	0	826.4915963	0	0	0	0	0	0	0	0	0	0	0	0	0	0	0	0	0	0	0	0	0	0	0	0	0	0	0	0	0	0	0	0	0	0	0	0	0	0
PS(18:2/20:1)	0	0	0	0	553.9744974	0	0	0	869.3727214	0	0	0	0	0	0	0	0	0	0	0	0	0	567.4095908	0	0	595.543245	0	0	0	0	566.4776558	0	0	0	0	556.829931	0	556.0588849	0	0	0	0	0	0	0	0	0	0	0
PS(18:2/20:2)	588.0388412	588.0947951	0	0	1449.742099	0	0	467.3296534	0	0	1167.259347	0	0	0	0	690.6479821	0	0	0	0	0	0	0	0	0	0	0	0	0	0	584.5057961	0	0	0	0	0	0	0	0	0	0	0	0	592.5449594	0	589.8869035	0	0	0
PS(18:2/20:3)	1401.038214	2279.055709	7173.62042	4936.274957	4127.63867	5665.497687	5300.215048	1539.553933	9436.151104	17785.6053	4223.501434	7871.195866	2327.686662	1017.144879	12054.41696	8993.776335	8445.299821	2620.954677	490.3850783	0	496.0823714	500.6178139	3599.767935	506.4035628	929.1773924	15942.35962	0	5010.773583	8033.573601	8715.422961	7407.099804	15415.39902	1040.700205	14725.45909	8147.584955	4823.651734	6856.959009	2603.916867	2720.015663	3145.574149	7840.127775	3508.904601	2718.925197	4430.804675	5597.436684	3358.963878	2475.418748	0	4705.457624
PS(18:2/20:4)	34366.8203	33172.29859	120148.3961	35221.71759	34003.70128	87043.94424	23836.62364	57390.92093	44520.04814	153134.2467	82639.05398	51023.70469	68548.63568	35994.98055	46321.14584	103542.6286	35177.29452	4754.118645	6144.990148	4246.614445	7315.996448	2620.642419	10957.57432	4184.166545	21850.43814	54245.74901	5120.319302	34322.26283	105364.9238	136043.9709	55087.39785	92944.18268	17386.69519	134865.2616	50188.10776	68189.72795	40760.48355	21868.79076	20187.39074	38016.15125	29075.29341	34851.74082	26378.52335	34051.74097	27392.73997	65001.58975	19886.79629	49162.61775	23325.34783
PS(18:2/20:5)	0	0	1562.101221	2394.495932	1801.522563	0	1224.802805	1475.519649	1454.968326	3158.763327	4177.148765	1586.139167	2555.763625	0	4103.682203	3053.629259	2466.159442	0	0	1027.630001	0	1054.195549	0	0	0	4565.791111	0	1928.167258	1051.836553	4204.126786	2623.573103	4037.762748	0	9365.445808	3168.47833	1046.421521	1053.915385	0	1016.917997	1562.892172	3146.945004	0	1004.857288	3147.883023	8487.793683	0	1016.135849	0	0
PS(18:2/22:4)	4857.074651	1897.633344	4590.712189	2346.54114	7077.996208	4992.357746	2505.134612	2220.934215	2642.233783	6798.470209	7232.630039	6046.490788	3301.291784	4906.137975	3722.815014	6840.748655	3783.840673	0	0	0	0	0	0	0	0	2304.493908	0	5669.036378	11529.85798	5007.525367	5499.836035	4520.746932	0	5215.422756	4940.035636	7505.077395	5539.494423	2498.51011	3255.073873	1909.853717	1943.768348	3421.561314	3895.742503	5627.120481	3636.17743	1162.340022	990.3577358	1978.581623	2041.253286
PS(18:2/22:5)	1812.410192	1992.702088	10112.45243	7047.411075	721.8126115	2445.261902	717.2346359	6286.171197	1178.94856	4824.360412	4471.56143	4835.201343	4026.187124	4542.512587	5577.417533	2631.808841	9331.471013	1041.541744	0	0	0	0	0	1042.874903	1927.104395	1855.99067	1517.015253	5059.765224	7128.661931	4988.427267	7086.660685	7078.712426	1510.28572	4285.069707	9094.269136	2895.903776	9204.769619	1505.818951	10620.94868	1656.889105	4513.105628	1685.920228	2741.032702	1227.92932	3661.593054	2227.885774	1966.995391	1489.959702	0
PS(18:2/22:6)	3655.018883	10332.83417	11493.93271	8542.239699	10519.38916	6116.794508	5874.565132	8798.204447	4988.652384	2220.640062	3536.337814	5305.869589	10968.11545	3094.384408	7485.293445	4692.660336	8801.631985	392.6107732	1522.186618	0	962.197343	1020.230579	1883.91927	0	1455.279746	4313.787948	2101.826063	8796.942862	3752.23115	5093.082947	8411.026614	12847.94576	1552.58893	12742.27289	12672.05049	5519.60817	6934.126163	2237.733207	5419.97122	1042.147557	4036.310612	1560.434589	1600.864361	2904.938035	1339.43242	4682.614379	2510.402675	2517.030393	1284.02753
PS(20:0/16:1)	9752.146808	9389.800848	12107.61722	16284.80782	35106.51102	31355.98749	13224.76617	18057.62748	32031.4914	10614.69577	25370.91236	19012.32886	18415.49754	7949.441818	15953.79615	11020.29544	12822.43042	1968.59058	1770.131509	0	1181.825189	247.8915134	6762.636191	2665.221596	0	29807.86717	4380.764279	36223.39843	25505.27007	26221.31697	45039.30825	34714.77286	11098.00103	106281.4605	92591.97735	17579.10097	15238.53313	9097.817295	24117.76135	3852.25572	19359.10684	36342.41545	27895.8564	27116.96157	114792.7255	20538.97141	6783.077778	18134.78743	26714.1981
PS(20:0/18:1)	1756.754398	0	5179.640958	1481.348585	1741.374337	6992.818341	3818.217256	4943.20718	2969.627554	6885.029407	3525.805574	1288.624311	0	0	2076.401566	1989.472932	0	0	0	0	2648.095465	1021.968232	0	1039.452092	0	3924.093256	0	7614.545024	7419.532688	4482.200959	8557.140785	10864.12291	1559.660451	9871.240141	6583.932441	8043.022027	2100.350924	7935.82467	7564.454871	3015.67572	3440.611182	7996.05945	5896.939184	7946.742763	2881.525659	6011.424698	1565.849273	4501.809123	2878.693683
PS(20:0/18:2)	690401.3134	382601.8756	431915.1484	449985.7841	477992.9633	744075.698	595178.488	789729.4563	634997.2405	354283.3202	609400.5179	643205.6613	724561.5127	624888.1758	624774.12	460828.1033	502388.2508	22973.48582	44349.50331	24896.4228	30106.92042	42876.76211	54305.70596	84427.24128	54395.42395	256137.4404	39065.91181	449055.6069	316460.6804	543096.3804	720034.283	688496.0096	53098.69841	682061.9912	774829.7928	348219.8064	385077.8808	189554.3581	264143.3669	64897.71065	469073.9646	399610.7556	400923.7441	494302.4244	300577.4069	248281.7255	159543.6401	195651.6612	344032.8018
PS(20:0/18:3)	6484.157154	4607.199288	2903.444152	10052.75231	3847.790715	11355.64101	9450.294328	8600.386335	15897.79619	9411.38279	19019.56026	6637.580207	6262.564208	8071.657279	9545.594378	4031.736898	8504.386414	0	0	0	1753.309175	2350.49293	888.3199851	1468.301005	879.752758	3892.862747	591.4200149	3828.978083	11273.93118	13100.91796	7255.658769	14580.33385	4015.212911	18483.86283	22721.94772	1848.408809	9228.043435	1745.639106	5170.44295	866.7240042	4090.020853	6646.744361	3329.410254	6057.611444	14173.73153	3860.504124	5595.990776	6147.195773	3920.642713
PS(20:0/20:1)	829.5146973	577.4954698	3042.362397	1115.509776	1379.368195	3600.246591	1487.811902	2229.153213	6445.359725	0	1047.323546	0	2499.333485	1119.921779	552.9228566	1358.916438	0	0	0	0	0	0	0	0	0	1212.231011	0	2583.150029	1313.625818	4200.285032	4551.956649	2816.210659	1902.825898	4027.450241	1362.606923	3154.936636	0	1396.813613	1718.89956	1131.248365	2328.35057	0	2283.166403	220.2363805	1454.847373	579.1319235	866.2325663	866.9092233	1443.214897
PS(20:0/20:2)	7547.057645	8717.135696	10072.15255	12073.22844	6725.362743	12559.39174	9232.329361	9402.040923	14552.19991	7180.078891	8708.941976	12507.64288	8328.14764	10607.99078	5548.115366	5010.53655	4505.887547	862.8849373	586.4080688	0	611.7700677	0	857.0459106	1730.951925	581.9801075	5765.054225	845.8403913	8976.915118	9011.873064	11064.25651	13702.1827	14339.92663	808.8606912	13132.52079	20846.7566	7804.979077	9979.003805	5711.346195	6432.06447	1927.129792	7532.631569	5751.686244	10192.59818	10844.25403	5542.343774	8296.592466	2036.788411	2602.345009	10645.3936
PS(20:0/20:3)	36005.30653	14140.971	26743.70433	23757.88185	30721.79844	53387.89468	34499.72723	35710.39977	59412.47065	39980.413	59720.59897	22355.79124	28437.59064	39105.55714	31631.83369	26168.38741	23487.57341	854.2804464	2174.954896	1439.911569	1628.156554	1713.991537	5201.086212	4631.836685	4055.708571	32008.24588	3717.345525	37454.70892	41073.13255	42182.09428	49904.35102	23155.72132	7076.357969	97030.82818	55558.23917	31119.48236	26987.98193	11209.67651	28158.10159	7427.119603	28802.81618	40656.07812	49802.29513	26557.38168	77657.93759	30086.97447	16633.89761	27261.90798	41887.57609
PS(20:0/20:4)	104490.4581	58294.5536	102691.2349	90914.87604	125694.0926	154558.0187	97715.95437	158596.1638	116084.3539	86376.55944	112826.3973	105524.3628	113664.428	97162.10231	122500.2102	96561.88796	108735.5342	6639.27021	9897.621805	6652.804499	5001.142382	10270.46108	12202.05715	12560.40069	9475.321841	66460.64204	5331.525055	104636.8898	95782.99864	136218.831	171502.2211	128936.3279	20092.46522	263955.4266	125518.1029	121017.0628	87633.551	43548.52494	77292.11437	15479.86073	59502.04526	81088.96759	110550.7933	94164.55107	151333.4021	93160.69138	43157.16459	62582.25369	71839.91248
PS(20:0/20:5)	1667.090793	0	3238.701075	0	0	4739.639024	0	437.1804892	584.639345	5336.30786	564.0296811	872.884119	0	0	0	576.7334973	0	0	838.9094551	0	0	0	0	0	0	4443.852632	0	2442.79803	6614.850563	3835.70088	4431.273577	4904.955498	890.9994222	13339.32658	8607.960589	3116.281721	3041.708374	2176.407071	2878.394108	0	3619.591806	1708.409076	2878.162359	6816.375493	15772.40754	1591.732253	3175.32153	874.858579	2702.685286
PS(20:0/22:4)	4798.251028	2292.156745	3637.71008	4218.489847	3547.772518	7850.755587	5190.682808	7448.735684	7402.157719	6072.543403	11882.00598	6673.714952	2835.811801	5921.260031	4705.00883	2642.835348	3463.133122	0	0	0	0	549.7209003	561.283622	0	557.4536472	5579.836299	660.4859703	6570.132756	6207.997791	9193.65102	7206.898598	6993.660475	2047.709489	7500.926925	9747.575419	3605.285695	6500.662955	2210.206299	5464.177472	0	4654.317258	6518.375702	7638.813591	7116.571181	4297.455609	3538.603834	1452.428549	3273.214435	3696.465746
PS(20:0/22:5)	10043.24669	5786.886147	10452.51865	9320.850785	9810.575326	18417.55317	11602.08586	13942.66469	12890.04708	14402.74801	19036.81887	14739.91747	16070.81852	13257.57815	11144.92226	5348.790709	13818.34846	0	0	0	1595.95379	1676.926202	0	587.7380838	1374.679795	4321.25459	641.1869889	9164.98972	6998.552195	13880.7104	16398.33741	10194.08546	3533.522829	22162.78891	26032.36265	7087.325756	14050.59079	3930.404439	8831.691828	0	8929.053244	10879.49868	9955.875917	10702.96668	10006.11218	5892.422695	6177.500775	2934.347522	7694.05361
PS(20:0/22:6)	21568.82958	28568.22225	31148.17379	31331.85482	29962.0392	42166.05513	37243.99201	42226.44595	46247.6952	15025.83023	29821.58501	26775.59146	56659.35692	21000.27268	38971.05926	28945.03788	17046.15808	550.2013046	2997.527762	256.6522946	510.2973635	1610.070809	824.6674459	2367.353408	4401.787375	11942.30441	733.8082816	23392.47097	6561.44035	17756.07264	30531.83663	38977.06757	1290.766214	47803.10962	51190.81215	18862.51652	16007.40532	7137.283553	18285.39966	1901.521146	25168.78836	17803.69443	13394.18597	11315.43521	24908.89323	6700.484556	13373.12704	6393.613159	13491.98496
27 OH cholesterol	0	0	0	1935.967412	1935.949539	3868.766605	0	0	1935.949494	0	0	0	0	0	0	0	1935.9675	1.551784976	5.728389641	0	7.940757447	0	0	0	0	0	0	0	0	2.362506594	0	0	0	0	0	0	0	0	0	0	0	0	0	0	2.746931026	3.212760891	0	0	0
Cholesterol	6758968.911	4820736.968	11731702.33	9157678.183	7254387.249	6069165.014	9264804.484	8974215.57	4624134.679	4424533.194	4440864.424	7387034.296	10692188.96	4796243.506	4700179.485	4134965.628	12244020.05	9938.286736	9894.253411	9960.918926	9828.360164	9935.305242	9856.354753	9930.843905	9922.153197	9952.552796	9943.199083	9958.912676	9938.020562	9929.472306	9959.288893	9948.836136	9934.866618	9967.458332	9890.742326	9947.666335	9946.212477	9840.653264	9954.640734	9970.946478	9921.517935	9951.555621	9967.761124	9929.565717	9954.867518	9955.206549	9955.615646	9934.244771	9940.587819
MAG 16:0	0	0	0	0	0	0	0	0	2884.252947	0	0	0	0	0	0	0	0	0	3.820910072	0	0	0	0	0	0	0	0	0	0	0	0	1.836741191	0	0	0	0	0	0	0	0	0	0	0	2.59055401	0	0	0	0	0
MAG 16:1	0	2356.76571	0	0	5130.58335	0	6767.101295	0	3775.553644	0	0	0	2045.974977	0	1934.55829	0	0	0	0	0	8.871004352	0	8.033894963	4.053445518	8.475509446	5.575625959	5.168181223	8.180087325	8.573570148	4.688742649	10.94862172	3.835589902	6.55085922	2.35044692	7.722332288	3.009390267	1.989927675	8.383243523	1.61255883	3.281283009	2.842938201	2.667054247	4.791691494	4.829323592	0	3.776441739	12.97021906	3.634729935	0
MAG 18:0	5762.208696	0	0	0	0	4834.589771	0	4615.593798	2263.279885	1935.834274	3868.983443	3652.035559	0	4793.872274	1918.740661	0	4834.773618	4.115977773	5.685198111	3.192928119	35.51808288	9.839946464	5.373411793	0	0	3.299950116	9.868031061	1.509465751	0	0	1.545408207	1.340790113	4.995027414	2.135572542	14.21079734	0	1.881442501	7.87366174	0	3.454935198	4.457460005	2.435319464	2.568184565	2.838475479	2.794333708	7.182441223	2.556920722	0	14.44731538
MAG 18:1	5801.868987	1825.090166	0	0	0	3869.031694	3784.610698	2240.427811	6799.721733	14509.41005	1882.708444	0	6710.606044	7063.933816	0	7271.018051	0	31.74163119	18.25349827	4.938699553	18.00392474	11.13594895	27.14783513	10.67497779	16.66329645	6.213085135	6.00381836	15.38190077	24.43170518	14.98966963	3.170670304	13.40984514	2.800482157	6.99187435	16.26378737	10.15465673	24.49010048	20.17442493	16.52917773	8.032847438	6.487756127	8.290247301	1.945664679	13.17668665	5.248497811	4.084287252	7.170287503	9.167459437	0
MAG 18:2	0	1186.919237	0	1933.07592	0	4780.230873	2474.522648	4898.445508	2262.713576	0	7718.138129	0	4888.186511	1556.606055	2104.818394	2823.409574	0	0	0	2.050250801	0	3.069576746	29.16356591	0	2.979589863	4.725984573	10.34626529	0	1.909629618	5.372286141	4.349032771	2.821866217	2.223233407	4.567287181	6.392790636	0	0.825384083	1.256176873	0	0	7.410947011	0	2.21249631	3.883430976	1.892397697	0	0	0	0
MAG 20:0	1934.05807	3652.274592	4558.929845	3842.932931	7098.434453	5776.526678	3867.703065	8003.421501	4258.592681	1570.651753	0	0	0	2071.049168	1952.239191	5767.130575	6770.945264	4.814216739	6.036385871	2.093781846	6.100616354	0	12.47133145	6.978324205	3.507286083	1.732275949	0	1.621933193	3.97048002	10.18166342	1.257563097	4.700595972	9.149937039	0	9.038135583	5.901922342	2.879271268	6.660036978	2.99482134	2.406142888	14.81304585	0	3.830762418	0.50716837	0	0	0	4.881453742	7.175293023
MAG 20:1	2343.249713	4032.617896	2115.679776	0	1935.802721	3871.787292	0	4596.871981	1487.595885	0	6919.833413	1935.355145	2842.255091	2280.177756	2008.236976	3867.327869	1935.355167	0	0	4.101798949	7.742562501	0	0	0	0	2.026771895	9.753957131	0	5.454721359	4.842046577	0	0	6.673866538	0	4.253960961	4.31525595	5.68820192	6.660810415	5.445746231	0	5.450869129	0	0	0	0	0	2.328971272	0	0
MAG 20:2	1935.274492	0	1694.113117	4838.268034	3845.35455	3576.993933	5805.199243	2836.257496	0	0	2836.253244	0	1886.835218	2171.218849	1854.302993	7702.213737	3815.419069	0	10.48393334	4.099047286	0	2.530931798	13.25557806	5.340570562	2.777063655	0	7.823521873	0	2.464554919	0	0	0	0	1.834808757	6.99743755	0	1.948930314	3.572500283	4.977040403	0	0	5.074275645	2.182725835	10.31989635	2.528272906	6.423024077	0	13.29788652	0
MAG 20:3	0	2972.602833	2664.413649	0	0	0	0	1934.05807	0	0	4792.828776	2882.49358	0	0	1487.516666	0	3625.934272	5.071481842	0	2.266229227	22.23786712	3.809022042	7.904898236	3.491159581	3.73970058	1.706435634	0	0	0	1.965809169	1.177599512	2.781900035	0	0	4.370674077	2.673332726	0	1.767249092	3.770599493	1.21095187	2.96063149	7.331908533	3.27569019	0	6.964704312	3.20962448	0	0	2.900119012
MAG 20:4	0	3398.843709	1935.950089	2900.45218	3541.688435	2590.8829	0	0	3613.578452	0	2902.252956	2899.537232	4040.610497	1887.626825	3626.210678	3045.023915	0	2.626472567	0	0	0	0	0	0	0	1.684257527	0	0	5.127821202	0	0	3.64851141	2.961490318	0	0	0	1.894956839	0	0	0	0	2.298887469	0	7.68176757	0	0	4.963142401	0	4.894664361
MAG 22:0	2517.701464	1933.024596	3064.329083	2902.300596	4339.631836	2902.564872	2559.090565	1935.949406	5524.095927	8704.329575	4833.122631	1839.955099	7603.634196	1935.855072	2696.966602	2104.431302	6147.108003	0	0	2.045807646	0	6.219391201	5.298560749	8.651928733	3.791911257	1.805897426	0	1.806453889	2.729552365	0	1.563439839	2.819082419	2.224322969	2.775470891	0	2.932310599	0	0	0	0	2.964068152	6.026695473	2.183295047	5.671723867	2.798510797	3.267233432	8.268593824	7.9517622	0
MAG 22:1	0	4841.83483	0	4816.443154	2902.497784	0	2865.888463	1968.987541	0	2359.733623	2810.897783	1868.915044	0	0	0	1874.868827	3323.738767	0	0	4.098867515	5.690706582	2.466497171	7.904898235	0	8.84680782	0	0	1.970732707	0	2.420479857	0	2.763913741	2.651538541	2.180240212	4.52045867	0	1.552637964	0	2.492610487	0	8.794047542	2.926070307	0	0	2.903582255	4.078586959	0	10.8064765	6.759280414
MAG 22:2	1934.62529	4854.563236	0	0	1935.886762	7738.504161	2558.883868	0	2616.34604	1749.211323	0	0	2254.701633	2865.715172	0	1749.020968	0	3.384228365	3.816269189	6.124592129	7.506651519	6.216632124	0	10.48194107	6.319270597	0	3.864839621	1.535899886	0	3.632680537	2.162150172	1.881948938	4.191248258	2.266950941	13.98788834	3.654895899	3.550167379	3.885233161	3.769161023	1.221818483	2.869746407	2.382363536	2.154459688	0	4.563596289	0	0	0	4.29793477
MAG 22:3	1935.965977	0	0	1935.966022	2079.612048	1641.136482	1001.393659	1556.487241	3309.208392	4836.763006	1887.544039	0	2168.437952	3564.274151	1887.626825	2340.044061	0	0	13.34448875	2.21583269	11.90538776	4.945633503	7.95126013	3.159261617	2.493524584	0	0	3.969533391	0	0	0	0	0	1.474776949	4.578583187	0	1.948869807	0	0	1.191298184	0	0	0	0	3.295338477	0	0	4.530367857	4.43019228
MAG 22:4	3831.262905	2899.843424	0	0	0	2902.499932	0	1487.489811	1935.9675	0	0	0	1387.571905	1479.165727	1887.507479	4488.976857	0	0	0	0	7.831760449	0	7.738822328	2.686691483	3.789690999	2.637019222	0	0	0	5.415456481	0	2.803936789	3.526448658	1.851330186	0	3.910468444	0.855990786	0	3.767550464	2.124194116	3.304467564	2.925924571	0	0	2.798358816	3.617977886	0	0	0
MAG 22:5	3645.525882	0	2653.182273	3959.442112	3782.800741	3560.255515	4891.033953	5778.06611	5183.184449	2475.783124	2854.881579	6138.601283	3491.644841	3866.746691	2875.622765	4552.146048	3492.419177	3.958132593	9.464953877	1.853238024	5.092833593	6.589919277	4.847909119	6.497302305	5.668676198	3.366535498	0	1.959584149	0	6.008467728	5.465508224	1.872527529	6.065565894	2.698904142	0	5.229230287	0	10.57752435	0	1.104076846	7.392425954	2.875447655	3.104520975	7.767414655	0	5.941073382	2.372153445	5.403169924	0
MAG 22:6	0	0	0	1749.333903	0	0	0	0	0	0	0	1932.958288	4275.096321	1935.834453	0	2883.109354	1934.638268	0	0	0	11.06210668	2.466403711	0	0	5.548148701	0	0	0	2.729552364	0	2.345976726	0	0	0	0	0	0	4.014393961	0	0	0	0	1.974284296	0.974746427	2.795675168	0	3.310188477	0	0
S-1-P	0	0	0	0	0	0	0	0	0	0	0	0	0	0	0	0	0	0	0	0	0	0	0	0	0	0	0	0	0	0	5.089078882	0	0	0	0	0	0	67.58583253	0	3.363351604	0	0	0	3.053272594	0	0	0.443877002	1.028622852	9.276220931
Sphingosine	1918.767249	0	0	0	0	0	0	2902.401574	0	0	0	4314.329622	4838.179983	0	0	1968.947218	0	4.449338418	29.11256237	0	16.13557424	5.404854624	6.553280764	7.140492227	3.246326527	12.67336474	3.97230219	3.151732705	4.587850348	8.647884786	1.636057973	4.646614289	11.11936118	1.414004799	16.92082849	10.55220197	4.281641638	16.93564865	0	1.662622836	8.73366173	3.210185264	2.01510043	7.139822464	3.802282279	0	0	5.053299799	5.231161318
[truncated: 7 more columns]
