# Supplementary material for: Plasma Lipidomics Profiling to Identify the Biomarkers of Diagnosis and Radiotherapy Response for Advanced Non-Small-Cell Lung Cancer Patients
Source: J Lipids. 2024 Jan 27;2024:6730504. doi: 10.1155/2024/6730504 (PMC10838201; doi:10.1155/2024/6730504)
Supplement: Supplementary Materials — The original data for all analyses in this manuscript are provided in the supplementary document, according to the corresponding subgroups. The corresponding subgroups can be obtained according to the supplementary file name. [file 6730504.f1.zip › Lipid (Control vs. lung cancer patients before radiotherapy).txt]

Sample	1	2	3	4	5	6	7	8	9	10	11	12	13	14	15	16	17	18	19	20	21	22	23	24	25	26	27	28	29	30	31	32	33	34	35	36	37	38	39	40	41	42	43	44	45	46	47	48	49
Group	Control	Control	Control	Control	Control	Control	Control	Control	Control	Control	Control	Control	Control	Control	Control	Control	Control	Control	Control	Control	Control	Control	Control	Control	Control	pre-RT	pre-RT	pre-RT	pre-RT	pre-RT	pre-RT	pre-RT	pre-RT	pre-RT	pre-RT	pre-RT	pre-RT	pre-RT	pre-RT	pre-RT	pre-RT	pre-RT	pre-RT	pre-RT	pre-RT	pre-RT	pre-RT	pre-RT	pre-RT
FFA(14:0)	26226.31883	80393.75253	0	9602.152861	28087.01512	15353.41957	180623.001	196940.5579	408325.3525	11160.65526	146976.3839	153794.8388	432185.5674	168788.1311	167446.9361	754414.846	535360.908	647650.5685	584684.5477	589587.1792	608639.3145	585732.8467	614848.3952	632612.4001	606199.8314	0	987229.266	1159860.658	980076.8027	941655.2389	1012161.134	1081619.04	1090417.981	1144077.289	683927.9573	2258998.576	490167.8469	1084827.854	1034921.149	1058562.24	2363404.083	0	0	430777.3224	639678.9337	468712.8666	787018.8932	97274.16233	306629.2642
FFA(14:1)	1350784.043	934898.0891	1446898.169	1028215.637	702446.9749	1411917.572	1120809.525	1143673.096	913902.0918	1654532.747	1271510.884	760046.8399	896820.369	819793.2245	1088553.384	1007090.566	634691.0304	1146818.172	563021.4893	614788.012	935532.4633	644556.0589	733623.3161	697558.553	421259.1064	0	1036729.616	702191.3662	735387.5287	740293.7687	803661.2903	646399.6903	663825.4697	676663.9212	319969.3438	776155.2837	508486.9673	924767.2538	684835.9729	787978.1157	480718.3635	0	0	696123.7947	663175.8564	662152.1795	443153.3474	540333.4202	697241.4864
FFA(16:0)	3416688.562	6602063.872	4007995.141	3151821.419	7028577.537	2752007.512	5938757.847	3699754.116	10754797.84	3140045.988	5309540.935	9107977.696	10875851.05	6968026.556	3135026.935	6196127.279	4181207.331	9224731.477	3984811.166	5632357.372	2975541.217	2861268.271	4149388.998	7298027.377	3527109.234	0	8157551.074	14996505.43	8132615.8	52589399.35	15967506.92	6196825.179	9411235.668	5147960.696	6387393.072	19725938.41	11391971.32	16112127.57	17972192.75	12681752.24	19779668.51	0	0	5331445.017	11567680.41	6902217.838	9658726.585	4936766.705	7098303.761
FFA(16:1)	369966.7538	701699.1795	417272.3645	321422.9805	585186.4115	319475.7873	950290.8018	349711.6715	2091540.468	413828.6398	551564.8417	1614598.729	1627677.414	843856.7259	419767.4669	274021.6945	373878.4218	360829.6314	105860.4405	176934.0265	72282.53438	42173.49778	133777.6171	650050.225	59219.97547	0	270120.6257	1070427.011	471595.0224	1331064.741	1172652.464	1362795.798	1783963.315	1332751.549	409065.4891	3749633.905	1059037.701	1234129.797	1417614.603	1065961.245	2685817.94	0	0	518190.1091	1770795.346	441141.2727	1541823.303	704297.4966	1408008.655
FFA(16:2)	294974.8977	294659.2343	253632.4453	287294.8688	305714.1567	293591.4081	256653.9928	264923.5369	276358.9053	335896.8689	280467.3173	257474.4721	278288.2878	298954.2513	282172.674	258898.1168	158587.9074	305429.2183	343559.9258	257181.9982	322068.3561	322200.4198	320514.3311	328870.0714	309842.6189	0	374236.4603	749556.737	244078.6495	630368.9936	669449.124	733350.4429	212505.3237	740295.7581	265501.4376	530007.7901	312707.656	725534.6458	739514.091	688378.049	262839.475	0	0	253040.763	381804.5754	389856.2943	344379.6827	265850.7226	257179.4494
FFA(18:0)	4601318.08	8212052.267	5802695.115	4475891.333	8816125.637	4087444.29	7390552.901	6506423.4	11936995.49	4232152.732	8438703.904	10421838.01	11224726.61	9696887.896	6602319.412	9632039.685	8104545.287	12003034.57	5512455.109	7404834.692	5059361.467	5857773.39	5461668.777	8196240.154	7480563.688	0	5537799.323	5781736.172	6353916.013	25074943.88	9804256.656	5320907.262	4175697.539	3673095.831	10171748.02	10297397.46	12640886.74	9651736.465	7977366.961	6878462.812	6780380.409	0	0	4905477.679	8545885.674	7657094.317	7667020.336	5270841.336	6125749.435
FFA(18:1)	11452711.7	33860047.15	20655290.42	13207490.09	31281531.85	9386931.312	37418414.25	18866572.22	63551291.38	11520421.48	29225300.7	49804379.23	55061067.43	35447667.94	7848356.096	24152109.34	15898990.45	19768057.42	5768952.534	11715509.28	8283740.93	6616725.164	7034023.136	14448154.13	5893788.499	0	15495893.8	30482530.61	15391167.74	74183584.95	34315105.3	11851420.15	20185019.52	6341031.739	16835210.88	33666249.12	36217246.42	30088485.31	39427661.31	23845537.73	25527368.02	0	0	10973436.12	31158249.19	11588577.71	22932279.92	20220873.53	24649292.71
FFA(18:2)	7331924.117	17331817.86	8099924.253	4968593.072	12644382.72	5015656.419	16807129.83	7494480.715	30014904.86	7725626.064	15356407.27	27700922.53	31441075.89	21534512.49	3615306.975	13843661.27	9098157.702	10200028.11	5076521.63	8231028.37	4599952.028	3590833.925	4106303.294	12918043.91	5002052.381	0	9735261.771	13895338	10019101.5	61491967.18	17438432.77	8196969.873	10115461.8	3380162.112	9353420.065	15532286	21729097.88	20408998.58	22001193.53	20122901.38	17487779.33	0	0	8063669.182	16250115.07	6563879.417	15493438.42	11485328.01	15158384.77
FFA(18:3)	200392.8598	784130.1162	218019.4049	305774.707	502085.0457	154401.0551	950175.9063	192657.7691	2025777.359	289726.9213	709714.6413	1443237.045	1643759.462	1127827.791	162918.8144	475593.5636	365229.1554	1293051.356	249396.8124	284609.4735	773028.45	599522.3203	210086.3529	478418.5702	264778.5555	0	534062.7728	526928.0543	513171.2468	8407620.974	866580.3872	823188.9262	676976.8187	214662.48	569385.9638	750006.3633	1093459.446	1106613.045	1324728.125	1760963.189	996450.5494	0	0	443310.6965	784536.5823	326174.1303	903729.3291	537914.8139	803541.5412
FFA(20:0)	2381732.042	1298149.415	2197977.646	1275730.793	3099860.405	1335567.871	812795.3855	1074665.973	1803200.9	828850.03	1519165.824	1543488.472	1071780.825	1556566.962	1152320.372	986808.5566	1178911.657	1960246.506	1363730.744	1014175.095	705962.2473	871458.9617	1631242.21	937682.309	1443681.757	0	2546677.524	1416873.578	2736114.575	1909654.306	1777739.881	2562636.956	2202389.838	3028682.108	1727484.304	1867396.497	5393311.028	2644531.179	1893201.813	2250236.735	1501382.322	0	0	439949.8541	900497.0055	1839986.556	1883807.991	1454532.85	1972671.995
FFA(20:1)	386712.8145	1712327.477	1167788.508	712965.034	1458480.115	428917.9668	1738898.01	947907.3464	6811843.59	592797.0293	1090544.854	1848327.334	2464894.974	1074224.84	597995.3821	1089580.223	614989.3223	720064.0676	103144.149	217979.3369	217249.0138	199888.0061	140460.2018	211800.469	114160.745	0	268590.8971	947698.1826	334840.1716	1789470.653	1065959.571	362888.4224	320790.4997	301837.4781	429228.9387	874088.447	1083635.253	1108834.449	833566.8906	363614.322	609213.8054	0	0	243758.5475	473805.669	168446.2355	379435.8077	452019.9174	376017.6289
FFA(20:2)	304859.8471	724787.981	495569.4976	375890.8381	859126.6041	255100.2691	840216.6306	465137.4805	1564329.864	463599.5465	902289.193	1230811.759	1370146.764	755148.8459	249996.3547	404046.5268	454852.3889	413761.9488	95129.12342	149644.3495	86372.62316	55523.47871	122052.7511	323349.8025	117089.2489	0	201755.1238	417747.4546	271133.6331	1448705.001	514924.581	196688.9998	250402.2683	91320.55551	369788.0546	416711.3655	627650.6353	410121.4451	496387.5456	315047.7628	244946.5065	0	0	248449.3363	379142.5015	253920.5886	379159.7356	324737.0084	382778.9244
FFA(20:3)	506903.7799	702937.1607	1054466.508	1181136.955	1582762.139	1041243.542	855990.0234	1299459.479	2212970.248	779324.9736	1609984.358	1594397.406	1741483.998	1320789.406	485213.2945	537836.5169	1129350.148	357064.8982	210121.1641	175037.2492	478920.7753	359383.5255	201757.2034	298662.2445	288044.0441	0	400636.6311	433502.3652	511811.867	1000883.121	375061.7247	431389.8635	354071.5612	435062.8532	352288.3224	404957.9719	957456.095	413108.5531	466667.7884	398060.4496	407468.7885	0	0	280785.5192	692394.9433	363944.7012	491550.2262	734139.9818	774998.1186
FFA(20:4)	743147.8533	1111321.567	1151247.648	1353789.655	1820492.69	968303.2411	1808616.283	1784918.225	2724515.224	1426097.028	1842660.424	1857757.119	2367151.836	1608928.31	599944.2034	952002.0221	1547775.769	764989.8408	587333.2822	457944.7449	397791.2691	326742.4146	728346.4295	420640.1007	570932.3983	0	286216.1638	571516.7991	408230.7841	2298194.949	622048.8963	454973.5321	771360.9924	352659.9558	520668.5699	1115312.663	1164199.584	843933.5128	957971.8998	449920.1066	371860.0645	0	0	603192.4842	652349.056	719190.3055	1718856.202	732308.4767	992124.8494
FFA(20:5)	314716.5673	338984.0608	1987002.536	438492.447	428469.5574	3367276.878	477546.9167	281768.1375	483703.2393	335377.0528	1514338.515	514512.5372	392080.2754	626659.2475	378634.0839	663376.009	447404.1525	213088.7144	284132.7951	167093.8511	187289.1256	181941.6941	277999.2083	267626.3969	301023.5174	0	245807.3502	223727.4018	1414676.724	217207.782	191159.2023	201348.0039	322825.3238	218951.1539	581929.5212	325163.2884	280547.3049	166264.7705	215485.303	228533.5645	215183.6174	0	0	264106.1737	372737.1032	1877641.388	328944.437	419529.9722	447788.8627
FFA(22:4)	413644.4063	863880.5913	804008.7042	749518.9887	1397136.411	509371.6692	932336.4518	825482.8117	1809650.243	806583.7008	1094222.888	1267127.585	1170487.075	909876.0095	269545.7021	458610.1571	723504.9772	179105.2332	57084.67092	95492.75	48101.87136	31017.4815	86067.35101	162507.6397	61650.94457	0	120813.6923	274484.0848	214080.203	955271.8917	282112.762	100167.7807	284404.222	87168.81298	295485.5523	379626.3088	619320.7801	260973.381	480986.6761	173243.8959	129445.1018	0	0	115887.0355	248768.3773	174054.6527	256162.5305	218031.2911	242928.0671
FFA(22:5)	206562.9547	647120.3003	459595.7061	599616.7829	1117273.782	231476.9886	725098.7371	602919.8531	1697950.855	691566.1838	922808.0131	870013.8759	1502648.554	645741.9849	198997.1003	382684.2178	590533.0323	194299.9651	74359.36593	92655.03657	62339.92132	29489.45121	80711.17528	80152.41715	59743.44719	0	119474.7132	488654.6466	105460.616	1219599.58	205599.6189	372425.3139	286058.1739	190579.4896	243706.6914	320388.4578	401249.9859	260217.2395	541181.7409	125375.7613	176812.0559	0	0	213352.5124	250497.2158	142793.9851	161206.6389	199719.284	234069.4232
FFA(22:6)	88888.48383	391686.0187	275810.6558	290404.9794	561186.774	139101.5052	313692.8751	305603.8329	690392.7365	236314.2918	247577.1288	288012.988	886066.555	274163.233	109536.2355	235933.0706	242046.4984	177808.8355	132966.0994	220314.4035	66462.27887	51409.22508	115078.2893	105416.9847	126583.7189	0	181143.8299	209241.9959	114431.6522	1360702.704	236863.6952	1163936.713	352931.5082	132817.7968	342790.8578	367985.9025	468463.1696	248859.0563	416879.1149	98863.17628	254989.5786	0	0	156355.7325	344994.7127	206250.8314	279619.4413	300832.1234	166682.718
FFA(24:0)	16516325.13	33070915.39	35244747.2	32907011.42	37838147.48	16387406.88	33692025.29	38425556.47	30775161.71	25862392.28	25123953.16	37075735.97	34971184.5	15466427.55	22559432.53	19926882.99	44321954.8	9894201.142	24531099.61	30581455.32	15694300.11	29980655.06	6634796.05	27397259.62	24991372.06	0	15865853.4	19605826.59	7995082.123	29232515.7	3389630.66	6146509.557	20387547.24	7371918.169	1483344	32651160.66	17542793.76	11366564.95	7149391.673	11123915.57	656750.6776	0	0	3999343.576	16461535.1	24003312.62	4688410.407	33691148.52	10990625.91
FFA(24:1)	646715.2515	1279560.984	1042848.606	1016138.112	1396454.898	559428.6182	922717.6683	832845.5196	2469251.298	600724.8539	643728.0716	830355.2051	1116844.295	740921.68	609839.2926	836844.5149	499890.906	371813.0113	70874.38341	97033.56844	191654.6066	167151.9245	59262.99396	96720.59425	52431.48174	0	192791.7918	471048.2311	257143.1653	257841.7714	351933.5627	102518.6429	229562.2719	42377.9752	323990.9001	273007.8607	839718.8614	365258.9012	117325.2726	41599.75158	191027.675	0	0	69351.5769	132327.9651	76122.35788	279036.7266	235349.12	332383.4742
LPA(14:0)	0	0	0	0	0	0	0	0	0	0	0	0	0	0	0	0	0	0	0	0	0	0	0	0	0	0	0	0	0	0	0	0	0	0	0	0	0	0	0	0	0	0	0	0	0	0	0	0	0
LPA(16:0)	1733.218118	858.7181005	1729.18827	953.0798267	645.9582802	1734.275139	1183.611152	1030.503111	0	0	1729.48321	1612.130681	0	1343.385258	880.0710148	1388.195881	767.322098	0	0	0	364.343592	0	621.6281967	630.6429219	0	1218.583677	5243.329808	1490.979943	1719.134426	2074.730118	0	1756.57505	1674.847509	2537.717687	987.221398	2326.66773	1280.266653	1556.142469	1229.896604	651.2544809	2370.252152	0	1011.954837	2845.444293	0	0	2112.233932	445.4341182	1134.626785
LPA(16:1)	0	0	0	0	0	0	0	0	0	0	0	0	0	0	0	0	0	0	0	0	0	0	0	0	0	0	0	0	0	0	0	0	0	0	0	0	0	0	0	0	0	0	0	0	0	0	0	0	0
LPA(18:0)	812.3409696	0	623.8557334	719.3392558	0	1327.67727	626.4828987	356.674953	901.7624815	0	0	895.9924304	0	988.5480965	0	721.9784471	879.3756169	514.5919884	0	0	0	0	0	0	0	801.0189123	617.6490823	0	0	0	0	0	0	0	0	0	827.3816524	0	0	1484.589256	680.2821618	1100.672347	600.6263086	356.6076879	0	0	0	0	0
LPA(18:1)	0	0	0	408.1053488	0	619.29	515.97	0	0	0	0	0	0	0	0	0	0	0	0	0	0	0	0	0	0	631.2021495	0	0	821.3859477	547.4689404	0	0	0	0	0	411.4219262	822.0084722	0	0	0	0	0	0	0	0	0	0	0	0
LPA(18:2)	567	0	0	0	0	0	0	0	0	380.8556645	0	0	0	0	0	0	0	0	0	0	0	0	0	595.6155	0	0	0	434.5072972	794.0424462	0	578.7130042	652.5732682	0	0	0	0	0	0	0	0	0	0	0	0	0	0	0	0	0
LPA(18:3)	0	0	0	0	0	0	0	0	415.7601132	0	0	0	0	0	0	0	0	0	0	0	0	0	0	0	0	0	0	0	0	0	0	0	0	0	0	0	0	0	0	0	0	492.2370303	0	0	0	415.2127133	0	0	0
LPA(20:0)	0	0	0	0	0	413.1748091	0	0	0	0	0	0	0	0	0	0	0	0	0	0	0	0	0	0	0	0	0	0	0	0	0	0	0	0	0	418.1059543	0	0	0	0	0	0	0	0	0	0	0	0	0
LPA(20:1)	0	0	0	0	0	0	0	0	0	0	0	0	0	0	0	0	0	0	0	0	0	0	0	0	0	0	0	0	0	0	0	0	0	0	0	0	0	0	0	0	0	0	0	0	0	0	0	0	0
LPA(20:2)	0	0	0	0	0	0	0	0	0	0	0	0	0	488.0894793	0	0	0	0	314.2769507	0	0	0	0	0	0	0	0	0	0	0	0	0	0	0	0	0	0	0	0	0	0	0	0	0	0	0	0	0	0
LPA(20:3)	0	0	0	0	0	0	0	0	0	0	0	0	0	0	0	0	0	0	0	351.308	0	0	0	0	0	0	0	0	0	0	0	0	0	0	0	0	0	0	0	0	0	0	0	0	0	0	0	0	0
LPA(20:4)	0	0	0	0	1023.327861	0	0	0	0	0	0	0	509.8175241	0	0	0	0	0	616.4991398	0	0	0	0	0	0	0	0	0	0	776.5522407	0	0	0	0	0	709.1353947	0	0	0	0	484.82758	0	396.2615373	0	0	0	0	0	0
LPA(20:5)	0	0	0	412.637243	417.69	0	0	0	0	0	0	0	0	0	0	0	0	0	0	0	0	0	0	0	313.6806319	0	0	0	0	0	0	0	0	0	0	0	0	0	0	0	0	0	0	0	0	0	0	0	0
LPG(14:0)	0	321.1884531	0	549.8913019	0	0	325.4622865	0	0	0	0	0	0	341.9435106	351.2320376	0	323.5985135	505.215876	0	0	0	0	0	0	0	333.4314307	0	0	479.0111555	345.802712	356.9214909	0	487.9766456	0	578.8690129	585.6643188	855.8922787	674.3347109	0	0	816.3331123	452.9822388	565.8279154	602.2022951	0	0	0	612.1853903	0
LPG(16:0)	1357.430086	858.7807056	1941.123863	1663.109092	1537.666136	594.0047386	302.1326273	3563.245226	1205.251337	2642.728243	720.4364254	1063.780154	760.0294376	1975.206482	2941.883058	4337.974444	2230.935496	4636.037751	1038.519416	2783.750271	1060.089341	1351.625685	2095.543718	1556.860169	951.9114768	6715.792036	2168.208936	4746.326421	970.1133349	2208.429127	1865.155107	1858.854363	665.5030378	4191.634344	1778.348166	2216.950985	1248.326499	3178.649339	4898.829864	3665.411425	6546.194167	3590.728875	7267.303552	1196.310005	1408.957135	790.8074216	3390.931495	1140.950255	2605.639569
LPG(16:1)	441.5721843	364.7940199	233.6449049	269.5071187	304.3454077	312.7990103	423.3528774	0	709.7042427	635.6716582	624.4717438	816.1704993	737.1017269	643.9162882	1056.16694	189.3907085	330.2759043	320.7517827	209.6799452	549.25015	0	327.5318384	322.590514	602.5004106	314.6008494	957.9292414	231.779038	549.4625004	423.6738046	489.7484279	363.5775227	322.8677356	506.7126911	209.0456198	244.1106464	883.7497596	647.1652918	215.3181962	851.5746511	0	722.521564	1192.038619	1335.318829	401.2075806	639.7703874	454.6316371	381.9469557	539.1766379	0
LPG(18:0)	3118.475517	1886.176684	6530.686989	5249.55217	4257.27446	1362.616024	323.4619471	371.3396645	958.1134889	3292.931614	1581.873684	2150.38193	2613.967999	544.6491946	2462.4859	2020.192556	2988.463356	6062.314643	4413.811561	3853.249184	3226.367732	1622.135568	4133.311983	2924.305041	2092.593972	3183.293057	3392.957753	1627.503088	3139.639609	5279.248979	2839.029609	3698.021904	4211.960927	3156.277982	2374.007551	5503.206869	3391.784213	5866.880648	2743.09224	5273.834779	5367.286926	4552.119347	3207.305235	2072.1818	1163.985516	2558.306757	17331.85854	2952.836453	5338.91037
LPG(18:1)	11460.33742	6490.128184	13644.21804	9404.787421	15653.77905	3894.947297	9763.086264	17750.26502	7788.550005	11882.52095	9027.762856	6578.263031	10799.64318	11299.85621	5487.236753	11433.81864	8267.133002	19302.72286	14995.12137	5241.52987	16721.38301	10083.04695	10130.3434	6145.459662	4676.816911	12396.56723	15643.59205	13013.63222	19286.87124	23815.4573	16830.19692	7881.220275	11789.65231	9206.947528	9013.783196	14015.90524	11588.61323	16929.61929	18882.34414	12346.46486	14776.4308	12984.68404	25177.10586	6331.620266	11746.44503	8232.617482	21670.69153	11969.47429	13284.01437
LPG(18:2)	11759.10636	5352.19416	4930.978083	5462.567286	6623.169436	2911.491461	2871.670974	8667.748414	5531.349945	8912.318905	3697.547404	8802.208762	6865.942221	7781.844805	10523.1942	2576.182408	9515.789806	8640.302626	7916.888052	7794.70758	3382.343445	8915.491282	5463.0119	6471.787003	6240.790376	10327.70738	3736.523794	4703.665474	9292.953783	9457.372692	6290.087287	2655.095057	5081.719366	8476.223592	6322.668817	4862.718633	5549.664325	8565.384539	3832.533522	11132.32727	12706.05708	7857.871485	11087.72182	4275.31571	6668.543035	7459.747211	10219.55411	4007.61802	4295.881774
LPG(18:3)	0	467.2832736	0	843.8183232	0	0	804.8500961	0	0	0	1680.383527	0	571.3495468	472.8858671	1280.481138	0	0	0	732.8016452	318.4066461	1631.69767	0	221.9063338	0	352.0756983	1882.060485	531.2922051	209.3022926	744.695773	747.5729899	536.9203749	429.1687088	2253.484298	338.3868649	320.2660025	576.220075	0	461.803837	641.2158504	390.9495463	449.4742464	1117.503769	746.5730708	996.6164802	1202.207289	882.1233826	385.3243584	599.7314967	2237.728427
LPG(20:0)	298.1627687	186.8857053	0	396.2612079	0	188.039967	416.2210233	652.5834027	0	252.1374823	0	571.0210716	223.5848371	336.6358883	0	318.6599815	0	261.9658938	268.0254395	527.8361713	526.2271262	0	259.2880103	186.6126071	583.9384338	539.1930841	287.2649961	200.1648861	406.4652024	493.5134539	0	288.3873574	427.6963765	221.5294298	0	575.115155	0	0	0	298.721038	0	957.3608504	445.042298	0	0	404.6897073	498.2861678	597.0850657	461.6283885
LPG(20:1)	0	0	0	0	1048.517017	0	1035.483467	0	0	1053.964073	1048.708759	0	0	1044.385341	1541.865541	0	0	0	0	0	0	0	0	0	0	607.9805692	0	0	0	0	0	0	1579.567941	0	0	0	1053.518547	0	1049.405121	2159.009335	521.6649449	1516.539694	301.2377304	0	0	0	0	0	0
LPG(20:2)	632.8557808	0	932.4721032	938.767112	569.238739	0	0	251.9951826	452.9749911	930.9020174	400.8562946	0	321.3764687	770.4657077	1375.119431	0	631.1026876	666.5181494	638.5448657	317.4223041	1201.899515	1167.856217	0	373.961942	737.3833419	961.3391801	805.5055237	660.7140746	1474.411205	2593.741443	1078.238705	816.614338	0	909.3356761	378.9499693	1678.296317	1172.029147	1503.70298	1791.485352	1105.552664	790.6952864	409.2717933	443.3996285	935.9027603	316.1363473	552.6483166	649.97016	735.0165794	762.6043864
LPG(20:3)	0	0	1879.268516	532.8244529	0	0	0	0	0	0	0	629.7418584	0	1305.689866	0	0	514.6880419	338.9358723	384.5713855	440.355842	437.9957939	0	0	0	244.1315375	838.9390211	333.8327004	0	434.2890819	686.1459714	426.26482	628.3413066	825.9442378	1397.161488	1520.981924	934.3750344	580.743454	1467.844902	793.0695671	714.9904124	760.458729	402.3290112	907.7147822	635.7050927	173.9515052	0	1310.005305	0	0
LPG(20:4)	0	370.9683887	373.7045553	0	829.6683303	740.3524454	0	662.9497953	550.8875019	382.18371	314.1943831	345.1168889	0	193.1387038	0	215.5063896	189.9813327	287.4425012	357.8285867	601.8896573	0	288.0678441	0	0	736.6099279	645.0895122	1038.099245	430.3196355	645.7521265	652.7003753	0	247.3348856	241.2722594	343.8755217	0	0	242.721116	327.7923607	434.8821425	514.2681623	322.6205119	0	1035.957535	0	496.8495654	0	929.9819187	0	405.3148969
LPG(20:5)	187.0356382	299.2349974	449.8615685	533.9204044	275.6445924	427.9128977	398.4123555	845.9992966	124.6306072	269.4338947	216.807131	278.5329621	592.3463939	1203.380583	599.6952888	417.197814	528.4904905	470.8086768	208.5814173	468.9788003	0	452.2998758	190.907813	313.7647236	425.0453604	1005.193156	790.4445021	188.8871792	500.7881459	526.4222867	253.0528833	454.8662302	626.2755636	362.3035205	0	742.2808838	471.6336645	331.0147881	440.3755674	340.6860418	1162.854822	793.6151601	529.9773698	190.8130344	0	292.049673	0	715.4588832	839.1768959
LPG(22:4)	447.3316179	343.4598281	585.246727	291.4733691	293.4146376	989.7481739	304.9472343	310.0092807	290.9436949	527.8358738	1022.23229	843.414619	865.400215	124.4913487	280.6163528	277.4124832	470.0210459	525.3654596	329.7686287	218.7902391	0	213.0981065	436.9501656	333.4839938	563.5250841	504.7649379	369.1134957	259.0973249	305.895357	353.2480327	524.9308746	417.8649176	680.1217917	522.4680221	0	0	295.5006208	528.4543859	394.7081541	321.378915	257.4325577	908.7734571	779.8106074	464.9485965	266.4002285	475.0252559	499.8085893	0	539.1676985
LPG(22:5)	258.7574303	517.0238979	1230.609616	959.9852631	631.9571619	134.5833424	133.6761739	558.8154193	464.8964659	920.526418	597.7152394	859.0382005	567.5010311	571.0540226	942.3819324	448.4966287	304.1556649	384.4222142	532.2735407	0	533.598187	296.6034666	366.6000956	663.6543694	488.3718065	621.5459223	996.1441059	921.0195624	741.8336965	1312.678935	828.6352518	636.6206998	1534.328434	1015.291077	0	631.8826771	1527.002402	827.0250611	574.785353	1399.659648	657.4404359	0	0	361.4974382	288.8479975	287.6766071	446.4132872	620.1703925	657.9820641
LPG(22:6)	288.6725817	242.7236793	266.9442295	495.2309749	300.9315963	293.8769064	131.9943839	163.4512154	132.8214068	302.721185	223.7996385	300.7461391	0	205.4301632	449.6208201	131.2352303	554.9154145	519.7076255	357.3517905	0	0	0	0	0	600.4259256	621.9055824	602.1930444	500.2657914	363.538378	829.4104015	496.0484388	469.856287	585.3980179	502.9463936	0	480.4639668	781.3804931	824.2081545	0	727.8310022	794.7478727	0	0	0	0	709.2606879	511.0803394	0	364.0935092
LPI(14:0)	0	0	0	0	0	0	0	0	0	0	0	0	0	0	0	0	0	0	0	0	0	0	0	0	0	0	0	0	0	0	0	0	0	0	0	0	0	0	0	0	0	0	0	0	0	0	0	0	0
LPI(16:0)	0	0	0	0	0	0	0	0	0	0	0	0	0	0	0	0	0	0	0	0	0	0	0	0	0	1636.504279	0	0	0	0	0	0	0	0	0	1190.402964	0	0	0	0	888.4125317	0	2021.054318	0	0	0	0	0	0
LPI(16:1)	0	0	0	0	0	0	0	0	0	0	0	0	0	0	0	0	0	0	0	0	0	0	0	0	0	0	0	0	322.8966904	0	0	0	0	0	0	0	0	0	0	0	0	0	0	0	0	0	0	0	0
LPI(18:0)	0	0	0	0	0	0	0	0	0	0	0	0	0	0	0	0	0	0	0	0	0	0	0	0	0	0	0	0	0	0	0	0	0	0	0	0	0	0	0	0	0	0	0	0	0	0	0	0	0
LPI(18:1)	0	0	0	0	0	0	0	0	0	0	0	0	0	0	0	0	0	0	0	0	0	0	0	337.4027039	0	0	0	0	0	0	0	0	0	0	0	0	0	0	0	0	0	0	594.5744833	0	0	0	0	0	0
LPI(18:2)	0	0	0	0	0	0	0	0	0	0	0	0	0	0	0	0	0	0	0	0	0	0	0	0	0	837.8383111	0	0	0	0	0	0	0	0	0	0	0	0	956.9366625	0	0	502.7118999	501.7012826	0	0	0	0	0	0
LPI(18:3)	0	0	0	0	0	0	0	0	0	0	0	0	0	0	0	0	0	0	0	0	0	0	0	0	0	0	0	0	0	0	0	0	0	0	0	0	0	0	0	0	0	0	396.0669053	0	0	0	0	0	0
LPI(20:0)	0	0	0	0	503.5846749	0	0	0	0	0	0	0	0	0	0	0	0	0	0	0	0	0	0	0	0	0	0	0	0	0	0	0	0	0	0	0	0	0	0	0	0	0	0	0	0	0	0	0	0
LPI(20:1)	0	0	0	0	0	0	0	0	0	0	0	0	0	0	0	0	0	0	0	0	0	0	0	0	0	618.469155	0	0	0	0	0	0	0	0	0	0	0	0	0	0	0	0	0	0	0	0	0	0	0
LPI(20:2)	0	0	0	0	0	0	0	0	0	0	0	0	0	0	0	0	0	0	0	0	0	0	0	0	0	0	0	0	0	0	0	0	0	0	0	0	0	0	0	0	0	306.6824899	0	0	0	0	0	0	0
LPI(20:3)	0	0	0	0	0	0	497.7	0	0	0	0	0	0	0	0	0	0	0	0	0	0	0	0	0	0	0	0	0	0	0	0	0	0	0	0	0	0	0	0	0	0	0	0	0	0	0	0	0	0
LPI(20:4)	0	0	0	0	0	0	0	0	0	0	0	0	0	0	0	0	0	0	0	0	0	0	0	0	0	505.308203	0	0	0	0	0	0	0	0	0	0	0	0	0	0	358.1394552	0	277.9896609	0	0	0	0	0	0
LPI(20:5)	0	0	0	0	0	0	0	0	0	0	0	0	0	0	0	0	0	0	0	0	0	0	0	0	0	613.5703688	0	0	0	0	0	0	0	0	0	0	0	0	0	0	0	0	613.546762	0	0	0	0	0	0
LPI(22:4)	0	0	0	0	0	0	0	0	0	0	0	0	0	0	0	0	0	0	0	0	0	0	0	0	0	387.209428	0	0	0	0	0	0	0	0	0	0	0	0	0	0	0	0	0	0	0	0	0	0	0
LPI(22:5)	0	0	0	0	0	0	0	0	0	0	0	0	0	0	0	0	0	0	0	0	0	0	0	0	0	0	0	0	0	0	0	0	0	0	0	0	0	0	574.0103902	0	0	0	0	0	0	0	0	0	0
LPI(22:6)	0	0	0	0	0	0	0	0	0	0	0	0	0	0	0	0	0	0	0	0	0	0	0	0	528.8457178	0	0	0	0	0	0	0	0	0	0	0	0	0	0	0	0	0	0	0	0	0	0	0	0
LPS(14:0)	0	0	0	0	0	0	0	0	0	0	0	0	0	0	0	0	0	378.4224696	0	0	0	0	0	0	0	0	0	584.8156109	0	0	0	0	0	0	0	0	0	0	0	0	0	602.4873378	500.5213018	0	0	0	0	0	0
LPS(16:0)	0	1085.149351	1385.048098	790.8477735	692.2915903	941.7808167	1227.539279	1647.739308	1286.592927	0	1186.708483	1143.103781	790.6391187	1483.176295	926.8538274	888.0580553	1368.974196	0	0	0	0	790.4069337	439.0562015	0	0	1042.117002	2458.807711	826.8604516	1615.152741	2904.809519	1918.637084	2572.128511	963.8801149	1743.205907	1142.087562	2270.461309	2505.618212	1844.877708	3490.396478	1483.299027	2274.725278	0	512.2162433	1760.396347	0	1237.114326	2574.721737	567.2826705	1850.799687
LPS(16:1)	0	0	0	0	0	0	0	0	0	0	0	0	0	0	0	0	0	0	0	0	0	0	0	0	0	0	0	0	0	0	0	0	0	0	0	0	0	0	0	0	0	0	0	0	0	0	0	0	0
LPS(18:0)	0	0	0	0	0	0	0	0	0	0	0	0	0	0	608.5318932	816.0596173	0	0	0	0	0	0	0	0	0	1317.346642	723.0689803	0	727.4697683	1327.367605	0	1067.669855	0	0	0	837.2341863	1359.302071	878.0773705	0	883.7069783	687.1468255	1005.510294	0	991.9926313	0	0	0	0	0
LPS(18:1)	0	0	0	0	0	0	0	0	0	0	0	610.3666211	0	0	0	0	509.1430151	0	0	0	0	0	0	0	404.6343839	488.728252	0	0	0	0	0	0	0	0	0	0	812.0746304	0	0	0	0	669.0566141	858.0743311	0	0	406.7729409	0	0	0
LPS(18:2)	649.5257186	367.2683184	0	0	0	548.2253805	0	0	0	0	0	0	0	556.8201622	0	0	0	0	0	0	0	0	0	0	0	0	0	0	0	0	0	0	0	480.4538259	0	915.3527616	0	0	0	1193.507923	0	0	345.0422678	0	0	0	0	0	362.7626509
LPS(18:3)	0	0	0	0	0	0	0	0	0	0	0	0	0	0	0	0	0	0	0	0	0	0	0	0	0	0	0	0	0	0	0	0	0	0	0	0	0	0	0	0	0	0	0	0	0	0	0	0	0
LPS(20:0)	0	0	0	0	0	0	0	0	0	0	0	0	0	0	0	0	0	0	0	0	0	0	0	0	0	0	0	0	0	0	0	0	0	0	0	0	0	0	0	0	0	0	0	0	0	0	0	0	0
LPS(20:1)	0	0	0	0	0	0	0	0	0	0	0	0	0	0	0	0	0	0	0	0	0	0	0	0	0	0	0	0	0	0	0	0	0	0	0	0	0	0	0	0	0	0	0	0	0	0	0	0	0
LPS(20:2)	0	0	0	0	0	0	0	0	0	0	0	0	0	0	0	0	0	0	0	0	0	0	0	0	0	0	0	0	0	0	0	0	0	0	0	0	0	0	0	0	0	0	0	0	0	0	0	0	0
LPS(20:3)	0	0	0	0	0	0	0	0	0	0	0	0	0	0	0	0	0	0	0	0	0	0	0	0	0	0	0	0	0	0	0	0	0	0	0	0	0	0	0	0	0	0	406.6201362	0	0	0	0	0	0
LPS(20:4)	0	0	0	0	0	0	0	0	0	0	0	0	0	0	0	0	0	0	0	0	0	0	0	0	0	0	0	0	0	0	0	0	0	0	0	0	0	0	0	0	0	0	0	0	0	0	0	0	0
LPS(20:5)	0	0	0	0	0	0	0	0	0	0	0	0	0	0	0	0	0	0	0	0	0	0	0	0	0	305.6606421	0	0	0	0	0	0	0	0	0	0	0	0	0	0	0	307.6391323	0	0	0	0	0	0	0
LPS(22:4)	0	0	0	0	0	0	0	0	0	0	0	0	0	0	0	0	0	0	0	0	0	0	0	0	0	0	423.8004545	0	0	0	0	0	0	0	0	0	317.293209	0	0	0	0	0	0	0	0	0	0	0	0
LPS(22:5)	0	0	0	0	0	0	0	0	0	0	0	0	0	0	0	0	0	0	0	0	0	0	0	311.724	0	0	0	0	0	0	0	0	0	0	0	0	0	0	0	0	0	0	0	0	0	0	0	0	0
LPS(22:6)	0	0	0	0	0	0	0	0	0	0	0	0	0	0	0	0	0	0	0	0	0	0	0	0	0	0	0	0	0	0	0	0	0	0	0	0	0	0	0	0	0	0	0	0	0	0	0	0	0
PA(14:0/14:0)	0	0	0	1026.04327	0	0	0	0	0	1046.927123	0	0	0	1010.00256	0	0	1004.459686	0	0	0	0	0	0	0	0	0	0	0	0	0	0	0	1049.371016	0	0	0	0	0	0	0	0	0	0	0	1012.955995	0	0	0	0
PA(14:0/18:1)	0	1497.485902	0	0	0	0	0	0	0	0	0	0	0	0	0	0	0	0	0	0	0	0	0	0	0	0	0	0	1049.529878	1048.805054	0	1049.428993	0	0	0	0	0	0	0	0	1518.573589	0	0	1000.676802	996.0398637	0	0	0	0
PA(14:0/18:2)	169.0989489	0	0	402.9016581	0	312.1500747	0	0	0	358.3264493	0	0	1184.871103	0	0	199.1237739	174.3860321	0	1027.945806	0	0	1528.792973	0	0	0	0	356.6174146	0	947.0069292	0	0	0	0	954.9149642	0	0	0	0	707.3034014	0	0	0	0	0	174.5041187	0	0	0	0
PA(14:0/18:3)	1047.566522	0	0	461.0547987	280.5886275	648.9445273	277.2045725	0	560.3682625	214.2259644	0	212.5587988	0	969.3956439	0	284.0822041	1046.622547	0	0	0	0	0	0	0	221.9645173	0	477.7270385	0	997.0305896	0	0	222.2301729	443.3849034	0	0	0	0	539.3231056	0	0	0	0	0	0	0	0	0	0	412.5189989
PA(14:0/20:1)	1562.580658	0	0	0	0	0	0	0	984.8783449	0	952.7487927	0	942.2134295	0	0	0	0	0	0	0	0	0	0	0	0	0	0	256.6847035	0	0	0	0	383.2706657	0	0	0	0	367.9514529	0	0	1047.401736	0	0	0	1128.724831	0	0	0	0
PA(14:0/20:2)	959.3187956	0	0	1057.853	0	0	0	0	0	1006.607351	0	0	1580.240516	0	0	0	0	0	0	0	0	0	0	0	0	0	1052.751404	0	0	0	0	0	0	0	0	0	0	0	0	0	0	1083.394961	0	0	0	0	0	0	0
PA(14:0/20:3)	0	0	0	0	0	0	0	1002.489021	0	0	0	0	0	0	0	0	0	1570.583486	0	0	0	0	0	0	0	0	0	0	0	0	0	0	0	0	0	1580.825186	0	0	0	1049.522527	0	0	0	0	0	0	0	0	0
PA(14:0/20:4)	1571.586659	0	1544.36405	0	0	0	0	0	1047.348916	0	0	1047.991333	1054.020424	1013.743359	0	1022.329804	0	0	0	0	0	0	0	0	0	0	0	0	0	0	0	0	1447.633388	0	0	0	0	0	0	0	0	2444.020338	0	0	0	0	0	0	0
PA(14:0/20:5)	0	0	0	0	0	0	0	0	0	0	0	0	0	0	0	1024.576199	0	0	0	0	0	0	0	0	0	0	562.5928475	0	0	0	374.9746531	0	0	0	0	0	0	0	1462.088885	0	0	0	0	0	0	0	726.9446334	0	0
PA(14:0/22:4)	0	797.9509401	1045.473211	0	0	0	0	0	0	0	0	0	0	0	396.2522405	0	0	0	0	0	0	0	0	0	0	0	0	0	0	807.4888203	0	0	1053.241431	0	0	0	0	0	0	0	0	0	0	0	1401.911642	1430.650619	0	0	0
PA(14:0/22:5)	0	389.3168072	323.4995443	0	0	0	0	0	0	0	0	0	199.8165049	0	0	535.3463386	0	0	0	0	0	0	0	0	0	0	383.2852137	0	0	0	0	556.2021968	0	361.0500859	0	0	0	0	260.2442958	357.3976084	0	0	0	0	0	0	208.1206879	0	0
PA(14:0/22:6)	0	0	0	0	0	0	0	0	1049.717649	0	0	0	0	0	0	0	0	0	0	0	0	0	0	0	0	0	0	0	0	0	0	0	0	0	0	0	0	0	0	0	0	0	1027.483842	0	0	0	973.2847311	0	0
PA(16:0/14:0)	0	0	0	0	0	0	0	0	0	0	0	0	0	0	0	0	0	0	0	0	0	0	0	0	0	0	0	0	0	0	0	0	0	0	0	0	0	0	0	0	0	1568.866945	0	0	0	0	0	0	0
PA(16:0/16:0)	0	0	1015.72358	0	0	0	905.3524786	1391.619917	2000.540388	1041.95942	1012.733788	0	0	0	2471.614932	0	1348.73525	0	0	0	0	0	1256.301277	0	1535.78368	0	0	0	0	1530.091687	0	0	0	0	0	1559.504873	0	967.9882684	0	1009.27045	0	1750.76792	2095.884823	0	1052.380485	0	0	0	0
PA(16:0/16:1)	2003.325083	0	0	0	995.7686688	0	0	1508.917646	0	0	0	1212.186175	0	0	0	0	0	0	0	0	0	0	0	0	0	1830.576422	0	1001.282546	0	0	0	0	0	0	0	0	0	971.3219237	0	0	981.5800678	0	0	0	0	0	0	0	0
PA(16:0/18:0)	0	0	0	0	0	1052.93374	0	0	0	1562.665841	0	0	0	902.339894	1503.273354	0	0	0	0	0	0	0	0	0	0	0	0	0	0	0	0	0	0	0	0	0	0	0	1447.981276	0	1029.427585	1480.555784	0	1056.691567	1041.033464	0	0	0	0
PA(16:0/18:1)	0	0	0	0	0	0	0	1786.310328	0	0	0	0	0	1737.281931	0	0	574.7526108	0	728.7299854	0	0	0	599.078829	0	0	1979.354668	0	0	0	0	0	0	0	0	0	2327.065085	3998.51595	1433.88613	0	0	0	0	0	1771.829926	1473.880805	0	1459.911088	872.891401	2020.797209
PA(16:0/18:2)	0	2455.498693	995.4968408	0	988.0960852	1484.745843	1992.747427	0	0	0	0	0	0	0	1726.459938	0	0	0	0	1546.03938	459.2271713	0	485.6514205	1027.885637	0	1047.380748	1008.325432	0	0	1049.410987	1043.149333	1009.364025	0	1566.933423	0	0	1518.218878	0	1529.573887	1548.726845	1471.344919	980.3454447	2673.057706	0	0	0	0	0	0
PA(16:0/18:3)	0	1265.710915	0	0	0	0	1253.227895	0	0	0	0	0	0	0	0	0	0	0	0	0	0	0	0	0	0	0	0	0	0	0	0	0	0	0	0	0	0	0	0	0	0	0	0	0	0	0	0	0	1576.057132
PA(16:0/20:1)	0	0	0	0	0	0	0	0	0	0	0	0	0	0	0	0	0	0	0	0	0	0	0	0	0	0	1472.808089	374.9730475	0	0	421.5070175	0	0	0	0	0	0	0	0	0	0	0	0	0	0	0	0	0	0
PA(16:0/20:2)	0	0	0	0	0	0	0	1001.383371	0	0	0	0	0	0	0	1053.981989	0	1578.53485	0	0	0	0	0	0	0	1592.976202	0	0	0	0	0	0	1578.333505	0	0	0	0	0	0	0	1030.875036	0	0	0	0	0	975.602682	0	0
PA(16:0/20:3)	1006.998514	0	0	0	0	0	0	1039.455613	0	0	0	0	0	0	0	0	0	0	0	0	0	0	0	0	0	0	0	0	0	0	0	0	0	0	0	0	0	0	0	0	1047.260035	0	0	0	0	0	0	0	0
PA(16:0/20:4)	0	0	836.1957062	0	0	0	0	0	1046.622592	346.5021868	0	0	0	0	323.4637669	510.1389121	0	0	0	0	1046.479158	0	0	0	0	0	0	829.3508473	1507.212323	0	0	707.1434413	0	0	0	755.3089028	0	1675.622151	936.3722568	868.8550547	1030.132308	0	0	0	1031.155524	0	0	0	0
PA(16:0/20:5)	0	0	0	0	0	0	0	0	1585.984157	0	0	0	0	0	0	0	0	0	0	0	0	0	0	0	0	0	0	0	0	0	0	0	0	0	1040.950374	0	0	0	0	0	0	1624.722234	0	0	0	0	0	0	0
PA(16:0/22:4)	0	0	0	0	0	0	0	0	0	0	0	1041.95942	0	1047.557552	0	452.8632189	0	0	0	0	0	0	0	0	0	0	0	0	0	0	0	0	0	0	0	0	0	0	0	0	1519.482699	1042.251913	0	0	0	0	0	0	0
PA(16:0/22:5)	0	0	0	0	0	0	0	0	0	0	0	0	0	0	1048.550249	0	999.0656877	0	0	0	0	0	0	0	0	0	0	0	0	0	0	0	0	0	0	0	0	0	0	1003.948918	0	0	0	0	1518.674655	0	0	0	0
PA(16:0/22:6)	0	0	1048.157379	0	1042.074461	0	0	1034.347737	0	0	0	948.289323	0	0	1556.32546	0	0	0	0	0	0	0	0	0	0	0	2035.94492	0	0	0	0	2596.48272	0	1037.45828	0	0	0	0	1037.488165	0	0	0	0	0	0	0	0	0	0
PA(18:0/14:0)	0	0	0	0	0	0	0	0	1582.92781	1056.306411	0	0	0	0	0	0	0	0	0	0	0	0	0	0	0	444.3706304	0	748.1126784	0	0	0	0	0	1175.072346	0	0	0	0	0	0	0	695.4787726	0	0	0	0	0	0	0
PA(18:0/16:1)	2994.661436	0	5499.666444	0	1999.232475	1494.791867	2997.879914	3492.459746	996.6866343	996.9998463	2506.806633	489.9776581	1967.534384	1500.483723	2504.968661	3494.847161	1858.662242	0	0	978.2941455	2027.392979	1011.850591	0	0	2017.330398	1647.833063	6097.758224	2252.882008	2579.414544	2271.115328	1538.749378	2565.945257	5124.971508	2040.599962	0	3569.510277	1788.54717	3591.848456	2529.384512	1001.183844	2668.277558	5231.6444	1024.597458	0	2490.571356	0	0	7019.554242	2004.789309
PA(18:0/18:0)	1509.766517	1007.111362	9909.572891	1515.908966	1944.536484	1505.347353	1514.218418	0	3035.341583	4401.593608	988.0303993	0	2356.244995	1996.275093	1411.574837	4054.530227	0	0	462.6577873	1513.480146	0	0	1514.117888	976.2872355	1008.166006	2651.703913	7065.855457	3980.517132	1436.57869	4110.002427	0	3856.572973	2317.135604	1659.175821	0	2502.818233	4152.298598	4631.850379	1542.571274	2522.658271	0	1545.723139	1046.290508	3990.844441	3487.800719	0	1994.369684	5035.314914	1400.361252
PA(18:0/18:1)	64208.60098	56100.46308	197322.1739	72358.33321	53902.56707	82386.69474	74400.22801	115814.5429	80215.6815	147763.3997	98177.85149	69622.94469	120973.6399	45935.28783	64850.98563	117950.7466	89124.779	13420.54639	17826.52292	14157.51105	25233.48056	18658.1651	21407.13776	10695.64863	43899.52952	119427.9594	226153.8166	76395.04532	95714.63179	126708.0488	67053.87824	126281.1113	101780.1146	76036.55412	16904.90074	78713.17716	88484.60285	188027.125	75360.06688	64582.29607	55295.01809	113609.6296	51840.77599	82861.88725	49404.47909	35819.23903	38642.04421	154173.1368	75723.63748
PA(18:0/18:2)	232487.6869	191778.9396	270604.5842	219038.7818	201880.0988	226241.304	180751.1519	267307.7603	131146.4993	180273.4336	142516.8145	244851.0299	264437.3993	165879.9335	226513.1267	162330.7501	188432.4438	30331.12066	59219.3593	66712.79478	53937.80655	51463.98142	86920.69084	52039.21567	146950.4146	142168.9126	338615.58	86575.13798	161816.9181	177835.2738	90520.28778	204336.2507	60764.91405	126324.1726	60426.70363	39685.49285	171602.0025	138075.8417	102352.2499	215057.443	97800.23104	73220.83883	233473.317	255448.8974	57715.12114	101901.1068	105287.5433	106545.9585	113619.3952
PA(18:0/18:3)	4245.408401	1996.48741	5416.065438	5994.262542	2033.199567	4541.337353	1501.971625	2025.93539	1519.906987	5514.795188	2650.191065	2012.158746	8454.26857	4012.035836	2540.667234	2020.381923	0	0	0	2023.759206	2017.79815	3032.091455	0	0	3031.231911	1467.894293	3063.759732	1543.77019	1013.917374	0	0	4120.337736	1520.38965	0	0	0	2525.446627	1491.503858	1543.116926	4114.745051	1030.132308	3137.759762	3140.279713	5490.476721	1495.096067	1565.848753	996.9230904	1513.899498	3851.702174
PA(18:0/20:0)	2062.188864	0	2839.261225	4105.547027	0	1537.479299	0	0	2540.396822	0	3457.850854	0	0	2048.738682	2060.657837	0	1504.024492	503.5162797	477.5924511	2047.999395	495.7282783	407.3617572	1424.46055	0	0	2611.925672	10746.25762	1540.181905	2568.271881	2416.975515	5176.006675	2669.568713	2529.255131	1928.88412	0	3049.560561	1604.024451	1522.717324	2585.255396	932.0338235	2951.890255	3656.933722	5006.070986	2067.373696	2551.923729	0	2034.819235	1011.090855	1000.08821
PA(18:0/20:1)	0	1516.542607	1525.042439	1550.415589	4027.486375	0	2293.287753	2547.405298	6086.600911	1059.459711	2066.961664	2561.312182	7664.512252	2567.192785	4076.679941	3076.935095	1530.175708	0	0	2038.790623	0	1009.259929	0	0	1009.854723	4735.288494	9421.323741	2576.913725	3535.055501	7078.685646	5167.957683	1033.000806	6671.806621	0	0	1526.987639	2053.546805	7226.106208	3055.240231	0	1791.074214	2614.280266	1567.769865	4529.052607	1006.028382	1006.223032	1013.449962	7663.338523	5580.783599
PA(18:0/20:2)	1530.876245	2890.964043	3969.192001	2560.004586	1584.634099	3403.691965	999.2678623	2819.645241	3039.073708	3078.361142	2545.777929	0	3043.019348	2043.347396	1312.122265	933.8168906	2563.103857	0	1016.410812	440.3282865	480.8469499	1035.364594	502.898822	0	1012.205657	2661.913698	9760.263187	2585.014462	2017.955206	6724.074199	1029.993618	6048.813393	1563.227327	0	2570.315302	0	3071.905123	0	4130.255953	1439.092315	2543.560683	3136.046026	4698.248944	11050.83291	0	3552.82743	1684.668723	2537.150035	0
PA(18:0/20:3)	44231.12583	28934.5263	124319.2349	47952.81959	45323.31849	53418.25739	36626.7341	66192.2861	44911.85764	74527.8663	51337.24983	41508.06361	64209.63396	36727.82611	49858.54339	77446.8231	38801.4897	9405.145978	9747.889155	10596.56824	8181.868346	3433.516009	21679.51363	7681.442363	39121.12556	53866.23042	142254.2838	34202.92626	53641.56739	56918.72422	34710.7101	67834.84304	40364.97589	34963.02674	12442.79037	26144.93722	46822.22029	98921.27345	51757.37303	52325.07117	25253.1798	55041.06474	39707.31977	54354.12107	21161.58744	33722.97488	21987.46988	57569.1587	29942.8521
PA(18:0/20:4)	419184.9802	425948.6952	1541238.417	532638.2097	731892.3465	965298.5921	423801.134	1140883.394	496241.7194	1341185.866	892112.1637	528477.6132	733253.8209	375072.2908	610659.8901	1163322.625	510440.6015	95949.88612	92253.05682	93990.90944	68134.79043	57995.78771	146718.6667	78382.91657	262198.143	839429.7973	1621038.135	381206.2336	531038.8116	778014.5708	343924.4246	784621.2018	678875.882	469777.2702	126750.8472	460143.1008	642130.8063	1453060.361	600744.9273	498063.4113	249292.0391	788038.0967	366840.4729	673186.2615	321127.6731	331517.4688	297317.1287	883664.761	474194.726
PA(18:0/20:5)	1554.585896	2592.038282	17640.15805	9303.688123	30168.84057	14546.65831	16431.77706	32630.25855	8038.414395	19712.06334	8300.269207	9325.684124	24330.00223	3040.544768	18686.67904	19190.41391	6755.238081	1553.153286	2982.740578	1559.164295	2593.058875	1032.1597	3091.561082	0	9272.868365	11454.81138	28643.9934	1554.119929	8810.291455	4098.80204	4672.641964	34253.4624	6232.882957	13483.59084	1562.058723	10869.03449	9321.232946	6750.452062	19427.2041	5184.832277	5163.434819	4162.743425	22921.77857	17964.63035	2047.863034	4871.037064	0	6200.079538	2582.295975
PA(18:0/22:4)	87470.79585	51957.82156	283104.5671	73090.33034	124816.1267	244228.1222	80642.96223	167662.6405	96261.65182	539084.3142	371572.8805	128078.0753	149267.0851	118253.655	91029.39315	253044.3567	142211.2945	19220.74788	11012.07066	7282.046413	18668.49762	12995.10122	26977.78623	23884.30368	38431.56936	196274.7157	406356.4478	142324.6717	227061.5751	297131.9291	75811.90458	85846.1655	297480.7959	90786.69792	19080.02711	215436.2319	153231.7574	488231.9836	104338.6358	137121.7759	62515.29976	320954.1286	37039.87247	107457.1391	84333.18655	63841.64496	52137.07679	345391.3218	132287.3412
PA(18:0/22:5)	67224.79968	40443.52345	169661.5701	66875.2113	98191.48895	106404.2042	58641.59519	146344.845	73509.47379	207177.6358	179413.0081	86265.73843	101774.1927	59829.2471	74385.69728	143712.3679	84676.85901	13545.22773	14359.8503	10391.66539	19172.30928	21241.73098	17100.13452	9330.470029	28522.77081	125785.2855	221752.236	39981.96884	93249.19658	123218.3995	51726.48415	110492.8784	90333.73705	68807.60342	19255.60637	65603.85211	74507.59111	209934.7232	93048.77585	119409.312	44741.64849	120086.8599	79814.47175	87822.69094	29861.4126	48421.94104	35436.61971	144294.396	74850.52047
PA(18:0/22:6)	68860.84013	65110.45316	146449.9319	56821.92146	109934.0166	91716.65917	70746.78487	130809.8072	54300.03698	47662.06336	57915.03641	53438.30827	101381.2027	45238.92282	82551.68324	85165.78135	49568.3035	5627.119864	9376.788021	9896.871001	5206.485437	14580.17924	7981.72742	7167.148786	29511.31934	75513.10785	117990.194	50911.48993	40494.29215	64993.72045	49935.58042	111569.2206	46692.54334	52879.76529	10949.98325	47244.63137	67731.71245	76759.57109	72859.46693	44720.91821	40540.64674	48752.11326	62701.59809	81335.94702	39454.24152	25947.58924	19755.17128	45705.9918	54862.43632
PA(18:1/16:1)	0	0	0	0	1056.19137	0	0	1026.557516	0	1501.116121	0	0	0	0	2335.180751	0	0	0	0	0	0	0	0	0	0	1676.027553	0	0	0	2080.522359	0	1026.685963	0	0	1922.44097	1032.159009	0	1543.142283	0	0	0	0	0	0	0	0	0	0	0
PA(18:1/18:1)	0	0	4054.946481	0	2015.850601	0	0	0	1013.626818	775.1507137	0	0	3401.641804	997.0626068	0	0	0	0	0	0	0	0	1008.319795	0	1009.275098	2539.357673	1568.081245	1030.248872	988.4767389	1468.113585	0	1565.300589	0	2054.502121	0	1038.616597	2021.828562	0	3594.85079	999.3678351	0	3114.212247	0	1850.667207	0	1026.544164	0	1556.474923	2732.331093
PA(18:1/18:2)	1007.014281	2003.863381	2517.973649	2002.747167	2502.528141	0	2367.745167	2498.849474	1937.539397	4009.49439	0	0	3521.525267	0	2000.468282	2495.059161	0	0	3063.633025	0	489.9938952	0	427.991312	496.4000667	1514.621799	1585.222819	3145.854006	1026.687441	1512.503617	0	1542.643507	1308.047867	1006.97763	2571.09752	0	0	0	3048.1779	5142.600382	2520.384979	958.7072516	0	1635.394331	2457.320792	1997.753134	0	1015.177375	0	0
PA(18:1/18:3)	1573.962054	0	0	881.2214069	0	0	218.5990752	0	0	0	0	0	0	0	0	0	0	0	0	0	0	0	0	0	459.3433188	0	0	0	0	0	0	0	0	0	0	0	0	382.2106276	0	0	0	0	0	0	0	0	0	0	0
PA(18:1/20:1)	1523.846713	0	0	0	0	0	0	0	0	0	0	0	0	0	0	0	0	0	0	0	0	0	0	0	0	0	0	0	0	0	0	0	0	0	0	1498.763306	0	0	0	0	1039.875425	0	0	0	0	0	0	0	0
PA(18:1/20:2)	0	0	0	0	0	0	0	0	0	0	0	1052.074566	0	0	0	0	0	0	0	0	1053.914887	0	0	0	0	0	0	0	0	0	0	0	0	0	0	0	0	0	0	0	0	0	0	0	0	0	0	0	0
PA(18:1/20:3)	1044.299775	0	1552.243597	1044.849261	0	0	0	0	0	0	1551.936551	0	0	1498.458278	1532.98731	0	0	0	0	0	0	0	0	0	0	0	0	0	0	0	0	1037.259431	0	1573.459548	0	0	1036.352653	0	0	0	0	1081.165825	1047.567451	0	1537.198422	0	0	0	0
PA(18:1/20:4)	1034.347714	2082.787659	10368.23583	4886.102688	3919.332513	2587.093676	6098.281318	10863.41715	6754.570127	5445.63615	4674.560861	4301.206252	3622.444886	1002.381854	7795.003276	15047.36485	3124.433909	0	0	479.2988075	469.7153572	484.1004232	489.3244455	0	2069.406737	9671.38631	8816.665334	1552.374625	4154.092319	2074.467465	2076.588789	3108.737208	3117.297671	5696.604496	1561.000068	3627.867232	6760.507314	3819.103615	4276.948538	0	2586.087539	2611.051155	2087.26909	7193.743343	0	2072.606582	0	1542.005269	0
PA(18:1/20:5)	0	0	0	1037.934557	0	0	0	0	0	0	0	0	0	0	1619.663009	0	0	0	0	0	0	0	0	0	0	0	0	0	0	0	0	1559.031474	0	0	0	0	0	0	0	0	0	0	0	1057.946092	0	1033.617545	0	992.0100818	0
PA(18:1/22:4)	0	0	501.1173465	0	0	1041.95942	518.993378	1034.347737	1550.138575	2646.400162	1025.486909	1011.264669	993.3697065	1562.430742	0	1564.653	472.209622	0	0	0	0	0	0	0	0	3131.752425	2067.05128	0	2038.404226	0	0	0	0	0	0	0	1564.179911	1556.43662	0	0	0	1070.672737	0	1548.806009	0	0	0	1039.437164	0
PA(18:1/22:5)	0	0	1041.692484	2024.351951	0	1012.038238	1037.93608	0	0	0	0	0	0	1026.539554	1537.884436	1033.672761	0	0	0	0	0	0	0	0	0	1051.454702	0	0	0	0	0	0	1036.564919	4153.859122	0	0	0	0	1038.368449	0	0	0	0	0	0	0	0	0	0
PA(18:1/22:6)	0	0	3628.923444	0	0	0	4173.219583	0	2601.402779	999.2693404	0	0	3120.473739	0	1559.95938	0	1044.161341	0	1580.088484	0	0	0	0	0	0	1525.16685	0	1041.018031	0	0	0	1038.886861	943.4320889	3634.740642	0	0	0	0	0	0	987.5766199	0	0	0	0	0	0	0	0
PA(18:2/16:1)	1055.697853	0	484.9000483	0	361.4508768	0	0	0	0	0	0	0	0	0	0	615.288257	0	0	0	0	0	0	0	0	0	0	0	0	0	0	259.125123	0	0	390.2900317	0	0	662.1507538	0	0	868.8660218	0	1601.447026	0	0	417.9791064	0	0	668.1517684	1051.471473
PA(18:2/18:2)	0	1048.136372	996.597807	1053.983509	0	0	997.1941525	0	1058.50639	999.2693404	0	1003.400479	0	0	0	0	0	0	0	0	0	0	0	0	0	1093.236893	1536.58788	0	0	0	0	1036.604295	0	0	0	0	0	0	0	0	0	0	0	0	0	1041.630501	0	0	0
PA(18:2/18:3)	1044.14338	1046.37262	0	0	0	0	0	0	0	0	2095.918461	0	0	0	0	0	0	0	0	0	1037.336268	1569.664764	0	0	0	0	0	0	0	0	0	0	0	0	0	0	0	1464.34168	0	0	0	1085.236548	0	0	0	0	0	0	0
PA(18:2/20:1)	0	0	0	0	0	0	0	0	0	1015.741496	0	1905.384475	0	0	1195.901422	0	0	0	0	0	0	0	0	0	0	0	0	0	0	0	965.2975426	0	0	0	0	0	0	0	0	0	0	0	0	0	0	0	0	0	0
PA(18:2/20:2)	0	0	0	0	0	0	0	0	0	0	0	0	1185.880157	0	0	1222.901863	0	0	0	0	0	1175.6001	0	0	0	0	0	0	0	0	0	0	0	0	0	0	1198.20054	0	0	0	0	0	0	1531.134422	0	0	0	1013.191328	0
PA(18:2/20:3)	0	0	0	0	0	0	0	0	0	0	0	0	0	0	1495.64344	0	0	1056.006024	0	0	0	0	0	0	0	0	1064.701174	0	0	0	0	0	1020.083415	0	0	0	0	0	0	0	0	0	1018.645793	1027.756551	0	0	0	0	0
PA(18:2/20:4)	1556.296316	3095.965905	2057.896075	0	0	1547.93107	0	2066.27161	0	1548.515006	0	0	1542.636424	0	0	0	0	0	1020.342245	0	0	0	0	0	1020.243475	4704.068056	0	0	0	0	1374.320958	0	0	0	0	1039.883409	0	1550.353561	1030.124695	0	0	0	519.8085156	1023.551043	0	0	1030.090801	1511.293999	0
PA(18:2/20:5)	0	0	0	0	0	0	0	0	0	0	1013.055003	0	0	1053.789203	0	0	0	0	0	0	0	0	0	0	0	287.359233	0	0	0	0	1047.13043	0	0	0	0	0	0	0	1042.334458	0	549.3467724	0	397.9510064	0	1004.257932	0	0	0	0
PA(18:2/22:4)	0	0	0	0	0	0	1026.636735	0	0	0	0	0	0	0	0	0	0	0	0	0	0	0	0	0	0	0	0	0	0	0	0	0	0	0	0	0	0	0	0	0	0	2087.864444	0	0	0	0	0	1589.19429	0
PA(18:2/22:5)	0	0	0	0	0	0	0	0	0	0	1041.957717	0	0	0	0	0	0	0	0	0	0	0	0	0	0	0	0	0	0	0	0	0	0	0	0	0	0	0	0	0	1030.011535	0	0	1014.748398	1025.311407	0	0	0	0
PA(18:2/22:6)	0	0	1037.970379	0	0	0	0	0	0	0	0	0	0	0	0	1645.412169	0	0	0	0	0	0	0	0	0	0	0	0	0	1438.836272	0	0	0	0	0	0	0	0	2015.03998	1039.255616	0	0	1057.399501	0	1041.033464	0	0	0	0
PA(20:0/16:1)	2041.430984	483.8306388	9381.747165	494.2313711	7617.500897	5053.876442	3070.067005	6120.987496	4553.060732	8602.221371	9347.263086	6080.784585	8452.211267	4051.609172	1436.321374	11682.61594	1903.824558	488.6824594	0	0	376.5916134	977.8160007	1533.405646	490.5087725	3554.227181	3140.255259	14705.24623	4082.753746	8572.209238	8069.055395	1546.944031	4694.832022	16942.83633	2495.392902	1531.884599	11659.17474	5554.11849	12517.52024	4642.420884	3090.233141	1918.306329	15165.27846	2091.398921	2936.577182	2806.491014	3519.550617	2519.366339	7371.146526	6743.747424
PA(20:0/18:1)	71038.47178	52207.05134	153256.6857	74689.05473	117576.9694	67454.92829	81932.58743	116412.2708	78289.26801	103038.0293	61653.34753	71634.48526	80393.16279	52654.02846	58879.54035	82192.24498	62826.30463	18906.59378	8551.111982	18848.52665	15927.80628	22062.16485	26567.60215	8501.835175	47221.09237	88520.86969	180452.6737	74818.50632	144347.8989	87970.29499	59676.57333	121116.6882	67564.19655	75063.31253	10825.89799	61059.95793	82401.83624	128846.6817	60234.47752	94303.10231	31991.33734	79854.44782	58458.50522	136689.4854	35780.74902	30946.73517	42973.09176	106106.428	59624.70885
PA(20:0/18:2)	418628.2731	273398.672	478038.2728	363623.6479	354118.9784	357056.2972	331473.5705	479328.4186	222032.0293	269797.3647	256691.848	405207.0608	507666.4582	257733.3178	315107.1594	230525.1431	283802.1719	53685.39552	71156.71967	65062.55302	62884.88434	93725.78599	89111.72398	69774.97268	239655.3255	254175.2386	515576.4815	156843.7035	392498.7782	263234.0453	162597.0817	410970.2323	118257.6284	224585.0954	69918.04396	72234.42164	343313.789	248039.3242	184449.2987	277295.3184	206186.9683	122070.7311	317940.7189	338545.5113	96137.74025	149128.3938	170498.1977	196554.6182	157906.1887
PA(20:0/18:3)	3585.59383	778.1564161	4650.270723	9060.511369	2864.268802	3324.549032	7007.1349	4384.594387	3337.518842	8258.989392	6657.019872	4925.036886	18374.24398	2546.421241	3276.447695	1676.58806	1048.096297	1363.628953	485.5404185	500.9653001	482.7275541	1687.574016	1191.844756	988.4588495	5580.380775	2193.824468	7229.140975	0	6290.091712	2663.776135	1032.351479	4501.569365	3601.98251	1547.679007	1039.251404	0	5445.563902	3424.061311	2064.705684	4486.300354	0	1564.860234	4115.835625	7876.57223	3836.768466	1030.128146	0	2792.008365	3916.793631
PA(20:0/20:1)	0	1550.330509	3607.817737	2579.826647	3663.515284	0	0	7708.877364	5006.378281	4108.974317	0	1417.987928	1554.178334	1915.59613	3106.439982	2798.70724	1021.075073	0	0	0	1537.025409	1002.853443	485.4817061	0	961.6214395	942.9484244	10271.10208	1554.878665	3565.81158	3629.656025	4649.547999	2208.091949	0	1036.915789	0	0	2603.103801	3754.695905	0	1510.691002	0	2082.84725	2082.505094	2030.885499	0	0	1539.235313	1517.860309	0
PA(20:0/20:2)	4663.410189	2907.632425	6204.349593	0	0	3914.146498	4625.951965	2313.785126	3902.631586	4124.855109	2603.726209	1485.358546	7237.849805	1653.046983	2600.339489	3841.763755	0	0	0	0	1559.043308	2561.448688	492.4844949	0	2413.783002	3116.140937	2833.513685	0	3713.210156	3695.20532	2596.596677	1906.130596	1563.02088	2070.19298	0	2192.055882	4290.277934	1211.082237	0	5168.999858	0	4438.884196	4004.945321	2346.794517	1534.179849	3061.807889	0	4497.763781	1008.821583
PA(20:0/20:3)	80839.01383	55302.23486	169604.675	68900.33482	80222.54829	131635.5722	95087.91783	135603.6344	62358.6396	140513.8455	88603.74181	70435.77882	77780.18237	48718.47718	70977.8191	141997.1446	47776.41765	6654.748119	7085.684264	9320.737947	6233.646556	10369.21274	25152.07675	10564.32348	52077.67153	98610.1686	193777.6727	34157.50126	77496.57493	75760.36774	56657.02043	93398.1131	70328.52303	64243.23256	11588.58998	57735.48741	83361.33191	112186.4682	84919.64256	60553.86789	33975.52086	80345.06188	66684.02437	84974.64252	31514.62561	40433.39966	39849.65152	92662.07829	45667.82808
PA(20:0/20:4)	778029.2487	829280.7954	2780111.925	815092.9012	1408724.6	1872775.867	988824.317	2408204.024	878213.8828	2400734.612	1675350.483	999341.7954	1236058.795	631112.0829	1114961.548	2053455.299	970315.2691	145352.4373	137496.3738	138515.0184	98808.70584	106067.0995	223364.3165	141850.9798	459111.5518	1304835.996	2795821.544	817687.4954	1126315.078	1048526.055	520096.429	1235071.231	1129287.815	920077.7372	161911.406	824103.5663	1068064.796	2170243.475	1037930.929	810334.2582	360825.7288	1129489.976	499311.9982	1048379.114	487397.7169	449531.3082	499784.8031	1485590.695	962349.4863
PA(20:0/20:5)	11661.50819	14058.12411	42403.57409	32743.85147	77215.153	29131.31816	40166.48736	84432.15806	23831.29163	33394.91204	18789.33163	15111.79699	46958.69732	9328.964376	29763.23192	44059.59928	12688.31941	2605.876553	7295.993504	5728.296043	3123.645792	2083.272631	8844.42255	2604.850663	7065.113509	37057.99754	69776.73062	5958.174983	37499.85417	11961.5617	8803.507897	78532.21083	19050.28131	28549.03558	3628.777416	16669.18404	27109.03397	21607.25217	48922.34646	10896.98641	20309.72522	9967.086892	35507.3687	39907.88889	8057.540617	13011.30791	3763.707627	17062.32914	8813.738648
PA(20:0/22:4)	98068.10617	70404.74251	327884.8228	53513.2736	160886.6742	284187.3608	66703.29347	162149.7394	97494.6664	678841.5382	514670.0586	153685.8858	147744.2681	93122.97724	91391.47425	344102.3486	132172.0978	14189.16913	4168.672132	4690.222692	13548.48617	17013.85746	26379.69381	21344.13091	41664.18777	223508.2474	447420.5253	158095.5125	193355.0946	224662.3671	81292.55061	61392.48185	303073.1851	70299.12952	14826.88499	173076.2415	146499.0844	517897.063	55206.31449	127157.9638	30504.60674	248782.9161	25302.64102	100216.3951	88473.10902	58861.12565	36926.02279	365719.0585	165071.4738
PA(20:0/22:5)	69865.41114	54181.68306	167438.4628	65117.87968	88825.29045	109755.7881	60718.18571	160477.2988	73633.20602	342128.9592	209627.9673	70534.54493	102979.2647	85575.87703	73021.6566	183503.6574	77580.85606	10875.63639	8906.010255	10384.70101	12299.85596	7185.258922	11978.6859	7289.458841	14582.31356	146372.5551	213654.8455	38042.6145	106287.1156	106717.0382	35004.39797	102988.6644	50488.59454	62188.12022	16178.19449	60413.42658	90859.91511	233716.9732	60009.91499	81837.53924	19630.77775	114220.7959	57845.46263	85380.9675	40812.03339	32248.52807	31523.48224	141414.4137	72366.30328
PA(20:0/22:6)	93124.096	81266.83081	193166.0541	104715.7322	96669.35951	112220.6698	100150.6762	238870.7889	62541.04208	97082.63367	93733.14714	69755.39781	124150.9891	65434.85366	77263.16211	132027.556	64120.39025	6085.506461	4177.928749	14516.37863	3727.885263	7267.33983	14131.36406	5688.853958	38284.24726	83979.82748	185789.1343	49740.85158	54362.78464	60037.72466	50716.24918	171601.019	64330.47952	67250.36839	8565.230188	50936.95633	72994.82556	109148.1278	86109.5844	36365.56664	44252.60425	62396.35526	70131.07451	98121.63042	29303.53934	42168.88868	14557.16158	61686.84262	63912.82676
PG(14:0/14:0)	0	0	0	333.879244	0	259.4330504	257.1891258	268.3508604	375.1875824	0	0	0	257.1872686	275.2056743	0	268.3399196	257.9543632	0	0	0	0	0	0	0	0	0	0	851.5443888	0	0	0	0	0	0	0	0	0	423.353375	329.4879414	0	0	0	552.8947269	394.4195961	269.3610023	0	0	0	0
PG(14:0/18:1)	950.6799079	0	831.0520572	536.076644	686.5059628	392.9505703	689.5609085	2156.448404	824.1315144	1135.077665	958.6384773	1092.356943	545.1374828	0	507.6048685	950.176889	543.976214	276.2750004	0	555.9881489	560.1596794	393.2162341	696.7560619	0	262.342709	2279.8728	550.7651047	797.6064751	898.6936134	879.4386283	749.9289724	1064.37815	1100.056681	1258.358038	0	836.6914918	881.813023	1062.35313	1820.67703	0	0	837.2307349	2813.299786	675.6002525	0	834.0242868	404.4220437	282.2100205	1376.506229
PG(14:0/18:2)	1426.067071	519.5844788	652.7985224	647.6102598	373.3672798	372.8343694	1100.901237	1918.466279	524.8920617	1431.552239	1818.251903	906.2703957	1416.851695	0	916.0295232	1182.766815	1822.11427	703.011342	0	0	0	282.1171603	553.0055773	260.5948914	411.2528226	1604.734198	847.388164	0	1102.961544	514.3230879	0	368.9072175	697.2798186	902.6355866	391.5143136	553.625	675.0344466	1044.752084	633.1578564	479.6221726	786.5369009	1199.020055	1514.022076	1527.835067	390.1085534	660.2420141	771.8539959	984.3996417	544.8721773
PG(14:0/18:3)	0	0	0	413.4906828	269.9620422	264.569582	277.1433359	0	0	0	0	679.7380343	0	0	412.0861113	415.9992764	0	0	0	0	0	0	0	0	0	0	0	0	0	0	0	0	529.0196435	510.82549	544.1701383	0	0	0	0	0	0	0	494.6218608	269.3835064	422.5658554	406.1098591	0	274.3095111	517.7412016
PG(14:0/20:1)	389.0979985	0	0	0	0	947.4778404	406.4507737	422.7857304	284.4912467	284.4912835	0	380.9688156	271.6883545	0	0	0	0	0	0	0	0	0	0	0	0	0	0	0	0	0	368.0362357	0	0	0	0	0	0	370.2862976	0	0	0	0	806.1200693	0	583.3098547	0	278.0920213	320.3562415	0
PG(14:0/20:2)	0	525.2659043	0	0	0	0	0	0	403.7488008	0	0	0	0	0	407.7356417	0	271.5108391	274.0093148	0	0	519.463391	276.2123604	0	0	0	0	831.2806164	0	260.6099826	910.812292	0	0	273.194148	0	0	0	0	0	0	0	0	397.7366233	0	0	415.5164037	0	0	0	267.6654324
PG(14:0/20:3)	510.5232614	0	0	0	380.9870065	0	0	0	0	641.2615164	0	0	490.851719	379.6873605	0	0	0	263.7790745	0	0	285.3526139	0	285.0247489	0	262.2245084	0	418.3227282	0	260.0878302	534.5965873	0	535.4727559	421.3785756	0	0	0	278.9019758	383.7062588	0	0	381.0405078	0	1301.457677	382.5221615	0	0	0	408.2031544	544.3049863
PG(14:0/20:4)	1211.647656	901.5438243	3702.639056	2036.263725	261.0726071	2584.807662	1766.437263	2353.683903	1226.637717	2160.30027	1799.202661	1227.172815	1890.406419	544.6089109	2481.294736	1394.728789	2171.9148	0	558.0898271	0	552.275376	698.1942212	419.7104527	0	837.4821248	1630.422225	4013.661457	1012.936769	1390.506862	622.0505386	758.5407871	2250.092507	1107.0559	1220.182132	280.0689819	833.6400556	1973.967883	2763.999239	1746.117216	1525.873065	0	1960.266696	684.5820611	1738.579025	0	263.700375	1087.256487	767.3218735	1673.333492
PG(14:0/20:5)	0	269.9598012	926.2902189	429.3719036	703.7150929	0	0	549.6061655	0	0	271.4175899	563.0499504	0	0	0	414.2407022	0	271.040968	0	0	247.3024657	0	368.8101017	0	0	0	0	502.017592	0	0	0	401.1229382	403.1793074	0	0	0	536.1331569	639.7557387	669.9999146	0	534.0210768	0	0	420.5077514	262.1819431	0	283.3235405	0	0
PG(14:0/22:4)	410.7362174	424.2386625	554.3397502	419.6525996	269.0897754	422.7768741	0	269.0240919	0	698.9970032	0	418.3326989	270.9324958	0	0	538.4434052	0	374.803096	0	0	0	0	506.5639937	0	0	789.6051338	750.710143	495.0787461	0	0	0	495.671429	499.181806	0	0	676.5017266	0	1476.215812	499.0159695	0	0	648.2566722	500.4756723	407.7951778	280.6154343	0	0	699.5351905	839.8592016
PG(14:0/22:5)	425.5199033	273.4903116	563.0975726	685.5443548	422.4071232	836.4899428	0	563.2295457	0	1266.029084	824.5715896	410.3445411	820.6570345	286.0037008	839.2853797	563.3383304	0	0	0	0	0	0	0	0	632.0244974	0	627.4817043	1013.132713	0	0	0	687.1690454	0	0	0	0	642.5802728	882.1128973	592.7001397	1064.146637	0	0	0	948.7430921	0	559.9156775	0	555.6643034	0
PG(14:0/22:6)	1267.26228	268.8428138	809.9928243	395.730247	849.0762288	416.7498999	281.0623335	845.074557	954.5687408	283.9683155	286.2849607	430.8765032	563.1623433	409.8513632	704.2185075	0	415.9228619	0	0	831.6591697	277.0204573	0	0	0	0	746.5166223	418.334344	0	972.2856073	403.0791844	0	938.6667008	279.2075063	795.0747581	0	419.4103938	0	402.9107408	674.4684624	402.5175754	666.8222959	822.7341091	552.7298837	268.2117056	310.5913145	558.1274086	530.2996194	0	415.6080434
PG(16:0/14:0)	1049.087877	0	1042.181724	1182.16011	1427.549298	1048.937192	0	908.7667514	1686.60097	1315.900217	1177.06432	546.2490218	395.6671481	527.049181	260.1094419	2887.388593	248.8325243	277.6700512	0	251.4158711	0	0	1515.048111	0	0	1335.225114	1353.05661	643.3206115	820.2161923	384.899793	515.4438577	1021.21347	3142.081303	10070.33674	0	1226.631284	0	1930.561664	776.3740678	0	487.0394952	746.5191599	5790.071539	655.700175	0	1574.703827	509.8665599	685.6418618	0
PG(16:0/16:0)	8325.769708	3511.470468	12041.29636	3233.837456	4497.942298	14296.72702	2988.435695	10286.89988	11601.46089	15619.78781	16031.74839	4432.941339	9061.686064	3560.81747	6532.714991	23204.38597	4439.880853	1268.894453	1657.792161	978.8653371	2524.817016	1260.997634	4638.252423	2238.788359	979.4998166	14886.57935	15912.99106	16566.95158	6255.331224	14084.74774	12589.96418	8184.253689	22749.94655	47647.18412	1121.635552	4231.81678	6035.032025	16501.41987	10214.17638	6382.452265	3229.282079	10233.04303	19143.65916	4649.533621	10763.02121	10182.47216	2101.386133	19478.48665	6513.648956
PG(16:0/16:1)	1229.910803	819.0017916	1775.246749	1786.664396	2180.284886	3014.785441	1089.311397	3425.525871	8621.509064	2434.127422	4762.890651	1089.619769	818.5304302	1364.330138	2051.612812	682.8419648	1095.103514	983.1260006	278.5773584	257.2828653	841.9687311	415.5997572	3076.203984	0	558.2672731	3815.672606	6243.491851	5443.773881	1534.479246	2393.331281	2394.492154	2392.322041	14221.23439	31579.77672	276.8420589	4898.43933	1397.901286	2129.612399	3581.922505	0	1455.40964	6439.201017	11427.81961	815.8760209	4933.045477	12003.82941	2038.201664	3863.603903	1806.395538
PG(16:0/18:0)	3891.605602	2786.911221	7032.917944	1693.341291	4617.867006	10636.45227	2105.232123	7856.929696	6457.880063	7273.703027	6799.15936	4511.564845	4399.540555	2526.616322	5782.153911	10862.02812	4478.719279	1526.903969	1875.234641	557.8462921	3324.467083	2217.389168	2577.614514	837.2130205	1395.197374	6931.458798	12452.63644	5808.99102	7522.347687	11412.39869	6194.698835	6486.891571	8506.231118	11144.12208	285.1393446	4605.462186	4350.478071	9627.971865	8415.225409	6365.094055	3413.991345	6357.835492	11905.33313	3515.66957	2766.671878	3344.523056	2060.846683	7635.143673	3685.408273
PG(16:0/18:1)	68224.24649	45230.61877	102528.5909	68758.79439	89047.63416	142698.173	49602.21803	126727.3025	154553.6111	109750.4661	178926.0118	101984.3158	86072.8518	56796.73597	106881.6562	106345.8277	40024.00107	18521.70512	25977.64327	7216.835829	45644.58648	23433.22474	57112.3718	14333.71821	12754.1791	110533.5869	216817.9279	147441.3178	84465.16535	124503.6503	148692.6135	108999.919	148605.5629	268784.848	10747.86297	152714.8999	84957.21841	143444.768	220461.6638	86245.88398	88833.18303	194148.6289	263207.4132	84304.44188	101762.7497	70120.0589	49828.98823	136377.2718	82146.19889
PG(16:0/18:2)	49448.66747	12541.46821	28076.89537	21193.90475	27270.61411	55862.64359	18987.39877	37558.33306	77921.98217	75135.7759	57173.53783	28125.12368	27415.32136	24422.23368	40122.71515	52064.97589	25005.84497	12322.57057	15304.65245	4479.68834	31046.58229	11020.57238	29628.24119	8845.338946	3619.200731	40686.68323	52297.56797	47037.15018	19566.76611	44670.30192	26298.56151	31662.64417	56504.44954	72868.95339	3766.088251	31942.83337	33994.29037	42937.78515	51693.35746	38306.65651	25077.42772	41406.65797	80523.84259	25464.37632	49686.41301	36715.73641	23502.76442	42668.42273	28031.92276
PG(16:0/18:3)	561.828904	421.8418796	285.5698712	0	562.1884715	822.317856	992.5694251	706.0516987	2394.480266	2106.893535	2402.293317	682.0697618	707.5601294	280.3542631	0	564.8077442	1405.434427	701.9753906	284.0814997	0	1391.351364	556.3529806	0	692.9036869	523.8806426	935.6368357	1391.658655	1202.615214	562.0421871	1464.240157	399.3068006	2137.405644	1421.559039	3330.143676	0	696.0625	984.0871677	928.5102138	2269.693344	1056.422273	374.950882	708.7094324	1297.4508	531.2949906	842.3824686	555.8188963	0	540.7123358	0
PG(16:0/20:1)	564.4105789	1690.967201	1263.481121	0	1127.09002	1127.620645	0	704.3460198	1691.105335	1670.80819	1033.048102	273.5378867	1268.590868	0	1691.436545	2114.241446	562.4039953	0	0	0	556.7645898	0	978.6485762	0	274.8096634	2596.413064	4032.323155	1599.792012	1531.620873	1872.756184	2671.147463	535.7325113	697.7685123	5880.659802	419.2774198	699.0054688	0	2271.38335	2140.186049	667.7239236	0	1172.686972	2609.7087	1529.918476	475.1313499	586.9886542	939.8480875	943.4645967	819.0493696
PG(16:0/20:2)	16388.97611	6578.652571	15286.99642	10386.59218	13326.73331	19969.13709	6029.60213	14595.58401	18479.34989	18405.91691	27528.56359	18171.43943	15288.76396	9589.309929	10617.45396	11807.16958	4432.628263	1117.330229	2074.63062	425.9222848	1450.688587	1955.119126	6277.529731	4029.404953	1674.720125	22826.10041	24196.70115	10668.44869	10435.92044	13094.98031	16878.63561	12401.90282	10071.57736	42546.80658	1536.461372	8523.554248	9998.447491	23967.40578	18331.71199	17347.51517	5616.818526	19109.26811	36016.0821	9462.282228	6945.028815	7538.663463	7440.583698	20144.29196	7644.392575
PG(16:0/20:3)	2663.592777	2387.123353	2108.599898	4373.027176	2951.287665	5168.529868	1669.608202	3896.184447	5320.779516	8160.860031	9780.456818	3353.903963	3234.109329	3935.657029	1310.349143	4044.012592	1393.372507	526.198274	139.4681793	838.2329643	1254.287111	978.1898613	2213.84868	297.378193	1348.586348	4513.819576	6233.372428	1731.276371	1743.717407	6789.005448	3337.356255	4877.625182	3450.627431	5181.314349	277.0050092	1259.597789	1682.034558	4093.251407	5778.489284	5103.013564	1432.860702	5661.584186	11620.11597	2935.492365	1945.407957	558.9863916	1522.229998	5598.944306	1817.990281
PG(16:0/20:4)	13548.8138	3172.606523	8379.415476	2058.058923	5226.422224	23670.21317	3589.471478	20955.34337	8154.449993	17863.27573	12466.84074	1981.985583	2812.764682	4929.418458	22906.10123	24575.12129	9741.812602	6046.286461	6660.381369	2129.51065	9271.789822	6526.601469	7187.336469	1903.312015	1215.544412	17937.83281	19113.83129	5640.48334	12526.02822	13329.69126	6404.561325	9102.425169	13627.16401	15781.03973	1359.514607	5250.313572	4818.698903	6861.069305	9659.287162	24949.8344	8170.939302	9528.490376	24539.15768	10424.38118	8802.121562	4688.167396	6355.114864	18315.56318	6713.912401
PG(16:0/20:5)	0	524.9753846	551.1219978	268.771341	393.7013211	0	281.8714727	273.1915236	0	984.7552907	0	0	413.2028204	0	0	704.8169994	262.1722447	412.8001524	0	0	0	0	0	0	275.2	667.9758937	0	933.7095728	404.9232861	0	0	1328.525308	543.28397	1067.325355	0	0	411.6432424	0	0	0	0	0	1333.124554	0	418.3533604	396.173474	265.7865879	416.4032483	0
PG(16:0/22:4)	426.6641552	0	800.8765659	0	281.3543903	0	261.9975	537.3745476	0	272.0376973	270.504399	397.1975606	0	284.3566712	702.0941975	0	402.6630849	0	0	0	0	0	276.2689225	0	414.2891204	1321.10658	549.4801441	401.0299138	274.1653296	1068.188288	0	0	689.4195025	0	0	1242.954218	0	1056.864815	801.8527839	0	0	406.764773	0	799.4080731	536.9305842	265.6360017	0	1391.122943	550.5117329
PG(16:0/22:5)	373.8425213	773.4614981	1452.944233	0	880.5837094	509.2386834	0	1285.08318	1018.17763	772.1157864	2315.685926	495.6131548	372.1123194	260.2056199	520.304602	505.6223194	1414.962333	0	0	0	0	270.8681895	0	417.1452919	0	1190.565706	1648.444029	0	680.652472	807.2495501	536.1428544	1205.879898	405.0641839	1046.369213	0	0	693.4322408	648.1968982	804.1139716	402	0	817.7345378	1047.09119	903.6103756	0	491.433369	0	692.666874	409.1382543
PG(16:0/22:6)	1025.752102	522.2748842	0	269.1844234	516.7778368	2175.476714	1284.10693	1653.122967	0	0	249.9318294	268.156703	1542.517787	537.4903225	1169.867401	1028.112279	510.1425225	555.7750645	0	0	1108.336016	0	0	561.7946946	549.9264646	1383.638604	828.045831	725.7402099	645.8691013	0	1330.887484	1813.453402	273.9590491	718.6175521	0	687.0306447	550.2316029	0	1209.361592	1306.527102	658.3377151	811.2974056	492.5607615	504.8674014	404.3004064	758.2132548	397.8169524	891.0541106	1146.531326
PG(18:0/14:0)	255.310479	268.9562511	254.0003163	0	634.4055842	1199.606008	0	662.2837884	532.2780367	924.8611495	0	396.004	400.1789692	246.1516057	794.5971246	2264.777219	0	0	0	260.5577553	0	420.3669291	698.6130096	0	0	918.1423604	838.782741	0	0	611.3834032	845.9682578	604.608	700.7836196	1333.237024	0	282.2727429	980.5622413	0	0	482.5035049	366.8976404	0	2867.846102	265.9465295	0	929.4799	0	823.8454018	0
PG(18:0/16:1)	825.1721328	414.1381902	1103.789559	690.4811083	966.6262204	1243.724403	420.1431724	1777.987643	1754.842653	966.9399111	1932.182048	552.6056032	1796.224067	966.124992	828.6998012	690.5558418	0	0	0	284.7039597	0	0	1255.882796	391.9055267	280.037498	2738.323765	2117.678766	1739.476614	1809.918856	4140.698557	1872.320653	1069.78197	6593.534231	11988.27915	418.4106429	3558.024132	418.9940712	2140.161959	396.6171271	1194.468066	1201.206435	3000.063517	3839.391424	0	1518.297854	3291.591728	0	2510.084034	1092.162214
PG(18:0/18:0)	554.0524419	2069.652085	3750.903682	786.6918727	4542.282134	4044.547316	1117.440321	3832.726317	4687.647223	2453.536644	3369.94162	4213.521797	1233.701057	1453.521495	1402.296032	5883.951981	1310.679983	0	558.9178871	976.6654223	1512.439591	420.3917664	1802.251868	1397.47959	698.7497326	4867.92688	9032.384525	1475.597837	5442.716012	4334.344683	2986.691605	4651.979312	6582.145176	6540.980759	276.4733492	8216.271153	5286.461326	4049.821926	5270.07605	992.9018578	2654.560397	7700.908423	8804.752527	3674.707216	2919.392407	1110.638447	1252.215434	3608.93942	4995.645048
PG(18:0/18:1)	51741.81007	24197.68909	55845.58334	29235.7002	82108.56865	94343.16264	27591.64058	88152.25207	111124.2587	68092.07305	99907.89489	77798.75796	36654.98902	33366.5536	62285.32508	71826.31987	23347.07201	12020.95771	11949.10183	12043.47325	25139.14121	11379.33378	41815.22299	8086.896176	8664.986812	102003.9523	187766.1397	68806.97948	70663.8779	92458.85943	90166.96932	67537.77917	72627.3565	78185.20288	6710.295037	151208.0682	59149.44276	89253.69934	108070.883	40653.89063	66106.46328	164360.356	220110.05	38056.06771	74153.2526	37021.19823	33193.73263	84611.21478	60064.42434
PG(18:0/18:2)	60545.7464	42773.51399	61142.10607	30622.04978	64091.02211	99749.4157	38504.73679	70973.18485	108716.7345	105844.0496	128013.8083	75316.65803	44617.00756	44890.97112	70502.43208	79940.09291	40506.67252	12958.38724	14873.44167	8659.445184	27814.58629	13026.96645	35169.03121	18031.87709	13748.73994	95945.65217	132059.8349	46274.74375	53759.84815	94448.46039	61968.35568	55326.94401	54886.78958	128313.3718	6664.102659	81545.69363	63705.81824	80193.81831	96189.15568	53109.21097	56631.55191	110647.4276	152739.8927	44907.47123	81124.69573	49801.93445	36629.46608	57691.07607	51748.41251
PG(18:0/18:3)	1151.152901	0	1552.933789	394.011214	538.4466436	845.5934669	0	843.7312768	2255.282221	1690.106448	2112.135033	564.5794643	702.4011066	1677.728433	1268.519747	566.6338807	704.4432588	1256.121395	0	0	1676.330961	0	277.0135051	0	0	959.3005109	974.3493282	0	837.6530025	1094.627973	602.8921713	970.730855	836.1996382	3434.568157	0	699.0739024	418.9565773	0	845.2874179	2674.228375	365.1539027	971.0153694	1090.93084	395.9764803	271.8300581	266.9422175	0	1119.875582	414.4513527
PG(18:0/20:0)	513.3342319	659.6307329	2054.030233	1264.972126	1054.080599	1250.069054	1110.146408	928.4591989	848.1390861	1780.513665	1066.620206	988.5887093	744.554319	1311.799921	1058.025698	566.8918752	1389.130779	346.4903126	379.3863717	0	0	0	576.4008662	0	380.0517771	1622.235011	1326.176508	454.9331505	1259.808735	768.4411479	1341.997633	1106.414679	502.4178448	1125.643192	626.7703222	1881.580051	599.5568315	740.4974933	1119.763493	762.4631572	591.5682656	867.296689	1610.657783	1948.353734	1244.581936	0	558.1471894	1139.950202	1578.653023
PG(18:0/20:1)	697.7740684	384.8240953	0	561.885624	701.5721488	1089.520674	411.1263794	684.5572027	4436.92355	1681.335022	1105.447675	1240.816782	555.2788497	392.436526	555.1761798	1247.853839	276.144021	277.8874941	417.6928924	0	556.2061853	0	1250.679721	0	0	1287.604943	2356.618728	535.5542898	692.7788604	1473.472389	1091.160905	1071.305115	832.0011475	1606.927862	0	834.2137622	1823.340958	0	0	0	0	1902.588559	3599.936847	940.4744371	832.6537552	684.6204582	277.5695073	971.345681	275.0476586
PG(18:0/20:2)	8818.986234	3976.019373	6171.635867	3517.225652	8691.561322	10855.70142	3372.889411	6726.411198	14865.26402	13930.97497	16508.45928	11588.01215	4331.359541	4299.292834	7178.333487	7295.322904	3243.687689	1250.342507	1807.074997	403.2716906	1945.743887	492.3515458	4030.712231	2069.579764	2551.465353	19112.27807	20478.68094	5300.46542	7067.266034	15750.93111	14623.43778	3627.422124	5126.204513	11484.50931	970.848116	9554.667158	7759.029108	11871.64063	7636.365381	6592.901258	3622.330304	16832.12257	31618.13989	6322.214502	8892.278739	5880.508761	6275.258437	10052.08275	7084.195585
PG(18:0/20:3)	3736.420503	1514.897206	2708.938797	1127.224076	1662.44141	3067.598159	404.5869149	2181.272989	8344.116293	2892.365657	6063.307763	1320.096412	1691.34683	1526.568834	2529.706847	1533.394134	975.918598	0	0	0	831.824962	551.1680242	1378.555954	543.9263332	831.3707181	9662.341641	9866.799699	1739.996137	2321.553802	7351.562177	2142.345323	3906.183319	3293.878456	9623.194992	692.850373	6593.189607	2346.054733	3735.664261	3896.092323	2007.322198	1173.561978	2909.748591	7465.910797	1016.466354	1783.034386	1997.959894	968.9007803	1799.716907	2432.357126
PG(18:0/20:4)	7499.749154	5306.755576	22615.07264	5214.952889	12159.47914	22215.86601	6072.322634	19188.54262	11471.77962	37053.53441	26981.79644	12195.15525	10307.27836	7119.006773	11050.13935	20952.83906	9391.686437	2228.772313	1840.889076	0	1310.299501	789.7466642	3805.797305	241.7738829	1573.306335	16642.62598	32516.67695	7846.896535	13142.58093	42995.11581	4006.567044	10081.25211	14124.00321	9420.317655	1052.413335	9396.75129	9080.818439	24049.04252	6254.720022	9234.522696	3800.109531	15611.14657	13373.64354	11825.16233	7235.329963	2634.631386	5472.217436	19684.07468	8627.797887
PG(18:0/20:5)	441.4992626	0	383.5234578	358.5599765	263.7899161	658.8851894	530.261989	0	528.0174003	0	305.4945072	0	264.2971021	0	0	276.7003299	544.1709124	0	0	0	0	0	0	0	0	817.5411022	646.7258864	383.6158039	501.4545474	0	0	0	386.8862622	0	0	0	0	0	0	0	476.8798902	503.8218063	0	0	661.8068611	0	0	0	423.4206393
PG(18:0/22:4)	526.5229086	265.0219414	1056.333815	0	0	646.4359284	0	0	0	1067.962842	0	0	0	0	0	0	555.6486645	0	0	0	0	0	0	0	375.912956	509.8294262	652.3147961	0	1044.994103	1157.787405	444.4621452	0	519.7908144	643.2	0	392.3082871	0	2058.092813	0	389.3752918	0	0	0	270.6557018	259.0754417	0	521.4379079	1317.280226	0
PG(18:0/22:5)	389.971439	0	0	0	403.0924647	385.4707775	564.2356787	672.2881796	665.499181	533.7494211	537.7106623	671.8815505	537.4352433	403.4914685	268.5938956	0	0	0	0	0	0	0	0	0	0	1106.562174	1057.968559	0	397.4124652	1178.043806	0	639.7994908	0	653.9199016	0	930.3613301	666.7866675	368.3319392	0	0	0	1042.527934	0	0	794.7323052	262.7666528	0	1078.419083	270.52487
PG(18:0/22:6)	0	711.3162702	834.8974372	0	354.6458753	1300.531983	480.2427293	1192.925516	361.9678073	0	0	360.8226519	473.0010732	598.6342449	1921.139456	1316.623645	0	0	0	0	0	0	0	0	0	413.0443318	0	0	0	664.3857946	0	1295.639552	0	0	0	443.1382215	469.6269268	0	496.2683724	0	0	1752.081596	537.5522984	832.167129	0	0	0	0	0
PG(18:1/16:1)	4838.916473	2554.286534	3645.535059	1662.379925	2806.633626	4848.017128	2775.526787	2768.318583	3868.170515	4537.664065	5737.467199	3567.149982	1864.071227	2527.642308	2109.473791	3991.329508	2248.512341	698.7533189	700.8953426	419.0837836	562.4204452	2375.16345	2222.303404	838.0057538	2492.961283	2276.42173	5020.327818	3796.915101	4107.999553	4704.311475	1807.064808	4723.647939	2634.301571	3086.28138	562.9442069	2973.706878	1947.174939	4367.470018	3407.087635	2802.407964	1685.861991	7162.953811	4407.639621	6307.330908	2090.711337	1595.571743	2428.982553	6132.88348	3614.419759
PG(18:1/18:1)	12796.23513	5588.569949	16035.00912	11289.54862	10969.87841	16139.49941	8316.543983	15431.51234	29892.58965	13296.49533	22828.65185	11460.82183	8632.06598	7841.356844	17458.05117	15919.62992	7331.219667	5556.082792	3255.961362	1251.255854	8872.985119	6514.180759	4340.850445	835.2395359	1237.389906	18510.56792	18892.89901	16054.15795	15418.83973	34280.68662	17128.2934	13719.43933	25241.9506	16775.58361	964.4112763	26760.22472	13886.85598	29566.45578	14214.80313	13382.15378	12825.65782	26099.07343	25434.54517	7136.334062	12399.12271	6603.011347	8440.813706	24383.7159	7680.936298
PG(18:1/18:2)	30451.78758	27735.58475	53074.43868	50798.18525	52369.42677	41408.06582	40214.55477	24345.80072	100329.5269	37444.76533	117187.8665	103296.6747	65572.45397	71340.12873	50385.58239	24137.93697	34118.01343	2027.31933	3252.915905	2104.848994	6177.182108	3484.192547	9873.717753	7198.169672	3338.701844	170521.8917	27124.4315	36678.00981	24397.16376	77562.89992	26735.57974	13057.434	39612.51367	59147.62521	2232.226341	23558.42061	17494.36485	72469.62047	24904.28117	19043.73143	170384.7755	90255.71058	37127.11041	73934.46194	44144.10772	11093.26666	30230.88661	106963.0508	32776.26878
PG(18:1/18:3)	2415.472586	1812.856392	1651.380873	2742.527144	2011.497133	2024.198327	2523.661853	2127.991936	4236.984654	1600.003872	2923.46689	3197.574822	2371.125457	2157.115135	1531.997441	0	1607.786039	0	279.0286787	276.2779979	1250.739286	0	263.5645148	0	395.345045	0	1250.672067	0	424.6909353	1606.852329	405.7465329	669.7260677	610.7907079	0	0	1110.295103	972.2735158	0	401.6067202	0	0	0	1331.561028	2174.058998	1734.948498	0	0	697.3177744	0
PG(18:1/20:1)	0	267.988605	0	0	0	422.4645127	0	540.5514949	421.2463014	0	0	421.2439226	0	0	409.5094692	0	0	0	0	0	0	0	0	400.4385163	0	394.3359704	1198.408033	389.8502549	406.1029675	0	391.1879194	652.3092593	798.8169884	0	0	0	0	391.28	0	0	0	398.0577946	0	268.0485927	0	0	0	404.5678286	0
PG(18:1/20:2)	1567.495186	0	416.3697965	1247.997541	0	317.9988742	0	398.0627513	2185.523468	690.3608192	839.2320376	1105.489422	684.7254009	274.2735877	556.1568785	397.9465922	0	0	0	0	0	0	0	416.3785228	698.2063638	795.739519	1809.229889	1473.937736	423.9336505	804.784196	536.5070467	536.3310157	700.021578	1340.767582	0	977.5004327	973.6585916	666.4850456	670.536	0	0	1450.56821	392.6778459	396.6868998	812.7113988	0	394.9948988	415.2106018	0
PG(18:1/20:3)	557.9052994	0	2196.262524	507.4534531	523.0818097	559.2628121	384.8361887	0	1708.013062	901.6885577	1033.844255	885.9484444	878.3646418	638.9094957	904.769855	406.3004277	391.4593186	0	270.8784502	0	384.236569	410.0688356	278.1260044	0	411.1875001	1090.932718	1524.228453	399.2334093	542.6097837	2815.754135	528.5944996	385.6136518	945.3584415	1836.02716	0	666.9430669	1096.811393	2126.651043	789.6765694	797.1922148	0	1372.872623	966.1183059	1805.317313	564.468911	0	258.055781	690.7427849	690.9563835
PG(18:1/20:4)	4932.43707	2928.642895	3920.955232	4361.895613	2661.132987	5096.227831	997.9029361	7064.956669	4410.863105	11444.432	3713.665808	2280.390517	4684.311261	2168.945393	9519.213096	10758.79703	4367.338438	861.3264854	527.9617746	663.7091094	1200.985602	1067.228564	1333.887999	671.3946944	1466.250743	4905.596819	7641.669444	3704.423033	5367.666998	11456.68553	1495.372194	3424.526232	5581.161385	2886.252774	0	5621.547588	3096.502494	8902.271816	4356.645974	5909.618303	3240.863068	6293.8345	6627.423702	3495.495364	2266.743128	497.6669423	2418.804226	7405.517111	3280.960949
PG(18:1/20:5)	539.6699467	366.5388922	244.6243972	244.6275004	0	899.7429277	254.029244	0	0	878.9851606	492.6752814	0	367.4616809	244.6429624	376.2495115	0	525.4906898	0	0	0	514.2985462	414.5663409	0	0	0	675.4865437	407.6558585	0	0	395.031387	0	0	413.9520339	0	0	383.5879497	646.0929805	0	0	0	0	0	0	501.9397367	0	0	254.6640869	268.2367578	411.7989523
PG(18:1/22:4)	0	0	265.7464574	384.3417438	375.7317624	751.8891928	0	0	375.9236851	1429.727859	515.4672337	256.4281566	500.1355926	256.0317604	257.0990939	378.9059486	634.3117945	0	414.7646239	0	264.238527	561.8857422	0	0	0	496.8159245	1378.911454	505.6154721	276.6298041	400.0769532	0	0	557.2662881	0	0	553.4267947	415.6124385	869.7345108	0	0	400.5781027	815.3884999	0	765.6701122	381.1742271	0	0	1089.195877	831.4052861
PG(18:1/22:5)	0	0	627.8471872	285.5751921	389.5823204	540.4179293	0	623.5667371	268.4911794	375.1147598	748.9586593	563.3151727	268.1470361	376.2609256	255.1394315	264.1715122	374.8975926	0	0	0	0	0	0	0	0	994.5951712	992.760428	0	535.7009425	0	0	0	754.6949766	430.6012247	0	0	0	673.658347	987.5450068	0	0	407.4992984	815.1501277	0	0	0	0	565.3190354	673.7408352
PG(18:1/22:6)	736.6677868	0	626.5801169	621.0246649	488.5786951	489.1733602	990.3985539	250.6241784	0	494.1111764	390.2582685	251.2110969	496.0044285	0	1252.232245	991.909873	375.8732481	0	0	0	0	0	0	0	0	1000.264851	1659.045039	587.0841987	579.653072	828.9166538	471.2217954	1051.590713	594.2960206	0	0	0	588.2504969	1310.320955	990.3965919	710.0634783	0	0	943.5536877	861.1752798	614.3855496	0	0	0	0
PG(18:2/16:1)	9655.909856	7992.604061	10493.54833	8758.656288	7167.006678	7851.683263	3700.058839	10018.53312	3721.371353	7499.622194	7136.90199	7836.290846	11806.23755	7889.095298	7309.90524	5971.044737	8403.922552	1708.575182	1331.163682	1730.417408	1159.075289	793.4864014	1996.753183	2389.347956	5010.095935	7607.170302	8914.838465	6528.774275	7893.41979	7447.817709	6273.06405	10107.30015	2424.218006	8113.903162	820.6760207	7991.719121	5744.67638	4922.954078	5986.334059	7281.68292	3220.841673	9441.491455	11765.39067	5598.864669	6381.284992	3124.818411	4750.720963	7228.317216	4969.276523
PG(18:2/18:2)	10697.77655	5490.58835	17202.82302	4942.432069	5619.288639	20529.26696	3235.86285	13645.48899	10617.7384	29167.95679	21989.62388	8961.86822	10481.27774	6894.080465	11186.59738	24913.86543	8257.4289	2087.786833	1362.145127	1817.465867	2607.101156	2647.210671	4609.951181	4189.946641	4494.223492	20405.75243	27670.84738	7519.460163	15180.24633	20846.76808	3000.686423	10352.05322	6723.966468	6257.39347	0	12710.46763	12565.94368	28287.1529	8453.542383	13746.86153	5109.424637	20103.6699	8941.331257	13583.97324	5741.283575	4664.593229	6588.441568	23551.48173	9990.419978
PG(18:2/18:3)	1575.33227	2315.468233	1187.369646	842.3446103	602.2183376	1222.064385	1522.809164	1484.656088	2683.527454	1791.896047	2118.230254	3193.139943	1814.517472	2111.157462	724.0671436	765.8890648	1423.876055	0	0	0	0	0	0	0	0	3624.220499	1904.076397	704.2133309	1032.623903	2241.524306	0	2483.40119	1100.685812	1401.469711	0	0	0	2634.549551	1035.636788	1149.292715	897.2766831	1746.182964	1195.224268	2575.186522	0	0	875.8948846	647.2275977	2363.585308
PG(18:2/20:1)	0	388.8581596	0	560.0095166	406.5160112	287.4477145	386.2452795	0	0	1110.90109	0	420.7038595	272.1568493	281.823782	269.1182882	0	0	0	0	0	0	0	0	0	406.35	380.262867	0	0	0	0	0	0	0	0	0	0	0	0	0	0	0	401.3627907	528.3129686	403.753135	0	535.3474618	270.5887642	256.6368245	0
PG(18:2/20:2)	1834.251369	2377.646326	1680.830574	1444.605585	1878.682831	3281.248643	1653.073088	2403.734282	2292.02647	7945.596866	4134.547387	2768.452693	1964.912985	1496.723689	2350.712239	1824.992106	1629.055687	0	0	0	0	0	0	0	0	4076.762909	2438.607354	750.6830738	1447.875752	1336.659061	1808.890373	1238.471541	1612.84124	800.1723067	0	1099.660963	1384.693609	5490.738488	1719.309891	1372.719887	3434.840998	2804.168856	2206.540842	2671.315904	1731.342207	0	0	5816.990949	0
PG(18:2/20:3)	0	440.8014604	0	454.4875503	1217.569138	1570.089333	328.4451776	1115.523352	554.4860146	841.1707799	2453.400852	1170.346176	768.1241484	0	0	1227.966989	455.6043041	0	0	0	0	0	0	357.1546027	0	1833.611494	1634.526144	0	357.6610615	865.4096866	1435.80568	767.6224277	0	494.3035635	480.8963873	631.3017239	0	0	448.9173232	927.0264736	0	1888.453578	776.7135524	713.9541375	375.3495751	0	0	762.8185997	374.5082699
PG(18:2/20:4)	5065.447472	1720.562459	7963.894168	4007.854617	5384.076793	6758.790369	1879.513336	9536.498279	2707.285015	4904.394633	4611.579269	2633.766542	2145.760613	1365.775134	4956.663425	4097.91844	3383.334557	0	0	1130.928302	1262.523677	0	1278.905904	1356.982145	1274.948387	4728.011938	2894.885042	1944.227088	1404.392003	5808.475437	2045.147216	5414.685517	2506.483397	2551.895637	0	2050.12429	2530.234405	2580.747809	2189.144263	3400.258991	2534.847799	4947.646456	2983.774869	3314.972302	2830.624734	2202.468528	988.0099198	7100.173765	2995.24223
PG(18:2/20:5)	0	256.2074833	0	555.3479879	0	386.140974	447.4992029	262.7358513	262.6735322	0	401.5395785	559.578875	0	0	262.6669191	393.8750327	380.1408108	457.8682716	0	0	0	0	0	0	0	503.9154662	0	532.0372586	0	534.392	557.7319804	396.3718782	0	0	0	0	0	528.7109049	717.630999	539.1399048	0	502.1105111	516.3535194	668.2967935	396.590595	0	0	812.2585523	0
PG(18:2/22:4)	0	0	503.7462205	0	0	397.6615423	260.0429068	0	387.3111635	759.4733156	0	651.3339569	0	0	252.0628091	516.4988755	531.3117272	0	0	0	0	0	0	0	0	640.5445812	0	0	362.3283714	0	0	365.6766299	370.2930434	367.16	0	614.3015606	616.6608641	0	0	0	0	919.3807513	485.8529456	0	252.987928	0	0	503.5866716	0
PG(18:2/22:5)	0	278.9240613	262.3210727	394.2489886	559.6840987	404.7838425	0	0	397.2963222	262.7008376	1049.863487	0	550.1494517	359.9962683	416.3885234	642.2982737	265.0364542	0	0	0	0	0	0	0	0	371.5298525	0	0	0	0	353.4780406	0	0	0	0	0	0	0	0	476.290484	0	0	371.0209533	0	0	0	390.7855527	387.1889017	0
PG(18:2/22:6)	0	264.5971667	917.8206713	520.9441035	537.9610123	536.0954123	283.4429308	267.8526646	701.3968982	401.745799	524.6374335	264.8325741	0	0	536.3415869	0	0	0	0	0	0	0	0	0	0	770.3167402	659.2703815	0	658.7020358	651.7689181	510.3073985	527.3107888	465.252004	0	0	623.0733294	0	1171.417277	0	0	0	375.0910022	512.3277659	0	277.2922471	0	0	0	0
PG(20:0/16:1)	259.5850246	0	0	399.1620774	0	0	0	706.604741	0	0	266.10547	0	0	274.1749554	0	0	0	0	0	0	0	0	0	0	0	0	0	0	0	0	0	0	0	0	0	0	0	0	0	0	0	0	282.3677713	0	260.2471184	0	0	0	0
PG(20:0/18:1)	549.3824158	410.9930405	685.3381349	388.3936209	407.4627587	705.7048366	528.8834835	709.8618899	363.3418708	975.3525602	395.4983123	967.7470118	948.7322542	716.0498997	405.1447627	852.5873218	274.9189928	0	0	0	0	0	0	0	0	2255.544677	0	1020.216501	0	516.9604288	1161.780928	0	0	0	0	0	0	1612.975722	519.9933933	0	0	1333.821354	1369.460566	672.2407695	393.9646607	415.0765499	417.0950161	1573.208987	0
PG(20:0/18:2)	1139.249941	669.6398405	946.8165055	918.8591005	931.1467694	659.1586107	776.2210914	673.5574554	540.0622382	1495.650073	699.7373974	946.6082588	826.4627456	388.7613922	810.9974022	946.5720821	378.391889	0	0	0	0	0	0	0	0	1707.636192	0	671.3468125	1177.888148	624.0697055	0	0	0	0	0	0	0	1785.609866	1145.705206	964.4664573	1053.71533	645.5914152	1504.112456	1039.244452	874.1132634	401.7561647	583.9977954	0	0
PG(20:0/18:3)	270.0960608	839.6903727	0	429.8663357	409.3398272	0	0	411.7556763	273.5245611	0	393.8399814	287.1523396	0	450.2958372	0	0	423.3287406	0	0	0	0	0	0	0	0	0	0	0	0	0	0	0	0	0	0	0	0	0	0	0	0	0	477.40364	269.6354091	0	0	0	0	0
PG(20:0/20:1)	0	0	486.5526354	0	0	0	0	0	335.4821521	0	0	0	0	0	343.6766381	0	0	0	394.8142317	0	0	0	0	0	0	0	0	0	0	0	0	0	0	0	0	0	0	0	0	0	0	0	0	0	0	0	0	0	0
PG(20:0/20:2)	0	476.8757778	0	514.6179175	271.7374295	0	0	0	0	0	0	259.6022492	0	0	765.150114	0	264.5249537	0	0	0	0	0	0	0	0	0	0	0	0	0	0	0	0	0	0	0	0	492.2424935	0	0	0	0	0	0	393.2342601	0	0	0	0
PG(20:0/20:3)	0	508.041128	0	0	378.365192	0	259.1751422	540.8757353	258.2203337	0	270.5706739	0	656.4340755	374.8121651	0	377.8136166	258.8803425	634.7048529	0	0	0	0	0	0	0	0	358.3292163	0	0	0	0	0	876.1571913	729.8261287	0	0	0	0	0	0	366.624	0	369.2706426	0	0	0	0	0	0
PG(20:0/20:4)	854.468418	888.6317842	670.807218	401.7412353	631.4160683	1324.562135	497.9850036	1488.056856	533.6713261	1240.894508	375.1293034	905.6554569	633.8186697	792.9249494	537.1013085	1652.78	1017.560922	0	0	406.349869	0	0	0	0	0	1045.766817	808.4395708	802.1548699	805.8247103	600.4153977	898.6709324	563.6749284	598.5986705	0	0	502.9770512	773.5545884	1645.322752	690.4781657	1293.50212	0	1316.74494	763.1073604	1120.924707	873.3460151	0	252.1777781	1204.168258	1455.414846
PG(20:0/20:5)	0	0	0	0	0	0	0	470.437508	0	0	0	0	0	0	0	0	0	0	0	0	0	0	0	0	0	403.2006064	0	0	0	0	0	0	0	0	0	0	0	396.9004918	0	0	0	528.7979684	792.0779171	0	0	0	0	0	0
PG(20:0/22:4)	0	0	0	0	0	0	0	0	0	0	0	0	0	0	0	0	0	0	0	0	0	0	409.0140065	0	0	0	0	0	0	0	374.8259479	0	0	0	0	0	0	0	0	383.9377764	0	0	0	0	0	0	0	0	0
PG(20:0/22:5)	0	0	417.2288146	0	0	0	0	0	358.0000771	258.3313206	0	0	532.2485559	0	0	401.0964191	0	0	0	0	0	0	0	0	255.571722	0	272.084312	0	0	0	0	0	271.0389784	0	0	0	271.1179762	0	0	0	0	328.9424307	0	0	0	0	406.8375965	0	0
PG(20:0/22:6)	0	0	525.313011	0	656.8591749	0	274.9054426	264.3344666	0	0	641.9206393	0	529.1296851	256.2872601	385.8122236	0	304.0020445	0	0	0	0	0	0	0	0	330.6744333	0	0	0	0	0	0	0	0	0	0	0	0	0	0	0	560.9605954	661.4763303	0	301.5473159	0	0	0	0
PI(14:0/14:0)	233.2881609	422.5342253	0	0	493.3040489	0	0	0	706.0963107	0	621.0907612	0	145.4440013	157.7178642	0	286.7782534	157.5060282	0	0	0	0	0	0	0	0	578.2686356	0	0	0	1116.01165	529.3761403	549.378189	0	0	0	0	0	0	0	0	0	0	0	0	0	0	0	0	0
PI(14:0/18:1)	0	1479.412306	5562.247755	0	634.528135	0	0	516.3385989	0	869.8487056	0	0	1472.717992	0	0	0	0	0	0	0	545.25811	0	0	0	871.9533154	2674.80251	5753.592087	3091.167359	4678.566807	5675.44543	3102.439059	4553.329251	7652.828974	4545.080961	0	3090.811964	3324.896557	4128.768576	4369.828937	2619.780536	3471.988686	3988.872881	6017.093327	4067.264625	747.0327568	1173.039182	1467.293451	2776.255387	4376.601714
PI(14:0/18:2)	15518.0697	15067.17332	10632.40236	9894.38547	10044.71731	16471.71056	12222.9924	11300.61112	8340.516775	9729.603465	10947.45166	14628.01208	17086.70969	15786.94394	11828.65803	9085.567247	10960.8466	886.3264237	888.6042474	586.3274167	888.2521114	1177.790281	1523.985576	1475.52175	589.1684421	6929.099146	11650.58282	4380.499391	12984.21703	13460.72796	6773.596508	10888.90751	6517.642712	1943.45078	1132.243132	2933.117758	12425.07019	6908.93949	11381.07308	12080.97285	6860.613015	11504.52885	17190.08742	7745.722329	10474.41494	4738.44406	2348.102289	10404.51423	9961.076955
PI(14:0/18:3)	319.9389706	0	0	0	0	0	0	0	0	185.4085481	0	214.8678843	435.6265589	0	0	0	123.6783146	0	0	0	0	0	0	0	0	0	0	0	0	0	0	554.6182512	0	0	0	0	0	0	0	790.8561308	0	0	300.0031554	0	368.9271015	0	0	0	757.7673879
PI(14:0/20:1)	0	0	575.9178156	0	1146.168507	0	0	0	0	0	0	445.8443663	0	0	0	0	801.6111591	0	0	0	0	0	0	0	0	1056.240119	0	0	0	0	0	0	0	0	0	0	0	0	549.9415235	0	0	0	2015.537159	318.1045027	0	0	0	0	0
PI(14:0/20:2)	0	0	624.1491075	692.8501623	0	0	493.5513648	0	493.3060512	412.8867209	0	0	0	0	497.2573415	693.3844007	0	0	0	0	0	0	0	0	0	1009.925411	0	0	0	0	0	0	1161.298541	0	0	444.5432325	0	570.9892127	0	0	0	494.2053059	522.0779373	822.7942657	255.7299075	0	0	0	0
PI(14:0/20:3)	4666.098244	994.0168761	5059.308275	4178.944763	4277.287519	1538.08177	3094.984334	2192.239156	4998.271199	1432.210541	3391.662003	3283.856843	2472.793181	3107.099772	4058.758105	1680.258578	3618.244241	996.8063339	953.5727138	2411.769159	236.2702461	2892.205418	1192.148759	2083.26816	1688.277129	3793.242722	1645.154192	4240.826459	3041.641201	2083.222308	3508.889558	2696.357637	2837.800142	1135.96332	1142.903114	599.1210907	1460.210698	4044.59154	3355.394935	1280.741328	2446.252587	4057.621109	4721.390422	2367.702332	2868.044016	3002.710004	4119.194984	2476.737681	3464.381439
PI(14:0/20:4)	8733.980948	7278.827945	10143.1491	5573.357321	5533.890636	8131.129902	7824.702296	18545.51873	5130.648504	5098.19184	3345.563808	6943.839024	5674.659642	10863.41415	10017.77473	8215.909858	5010.517734	0	0	1137.190454	0	833.4112406	0	550.009101	1121.123347	9732.110496	6722.369562	7248.594916	8942.19104	6397.855059	1510.87406	6639.89225	6969.576178	5246.320027	0	8397.361932	7537.098116	5575.476514	7627.563868	7331.589796	4256.431333	12492.82727	6878.830878	7082.956188	7508.749874	580.9372803	1436.914563	8239.738093	6537.55658
PI(14:0/20:5)	829.6492782	1495.562878	1953.592488	829.8615384	0	869.2162468	0	3908.931382	553.8576003	1167.230808	0	1775.66355	1391.226829	0	837.7395045	0	1387.812841	0	0	0	0	0	0	0	0	1513.121924	555.1308107	0	1431.139965	0	586.7054987	1737.026307	2838.166221	0	0	1956.807325	540.4323129	878.7311298	2183.412332	0	0	448.5464911	906.542453	2015.650987	0	849.392136	0	1422.484285	550.8901548
PI(14:0/22:4)	0	553.9326864	588.0592483	552.8271104	0	1406.259908	1400.300158	3114.068126	587.1775881	0	843.0981371	0	559.2928211	881.6393089	845.7583706	889.6524691	841.5934386	0	0	0	0	0	0	0	0	2120.002329	0	0	1127.990005	860.7287097	0	585.0448666	1694.858477	0	0	0	1076.90567	1203.406259	1173.82957	3553.609025	0	2389.684779	0	1158.791098	575.6095961	576.261824	1146.095947	1707.180553	2271.400165
PI(14:0/22:5)	2107.95723	1174.883097	1382.379372	561.9822949	2485.906233	2588.313116	784.7077516	2232.227134	548.8139357	1109.837336	0	1042.768546	1110.268378	905.7353572	582.2490596	1926.316155	1451.484592	0	0	0	0	577.5307615	0	0	0	1207.199425	1664.003612	0	856.4542934	2034.746918	0	1103.146854	1300.56982	722.2874612	0	574.1851071	689.9909086	1316.567423	1742.840267	1164.51184	0	1492.873501	902.0505602	869.4433502	868.9040189	0	0	836.5408675	1422.092734
PI(14:0/22:6)	0	499.9246609	1134.343016	686.0645788	229.526243	568.1816631	848.8169783	0	681.6128867	0	0	0	1416.299267	499.220593	1099.996022	1368.970114	0	0	0	0	0	0	0	0	0	2728.139187	0	0	1268.320953	1365.954156	0	1100.256244	0	0	0	0	0	0	548.8919831	0	0	1185.578233	2671.588462	0	708.0654268	0	0	0	0
PI(16:0/14:0)	0	0	0	716.7653961	0	0	0	0	0	0	0	0	0	0	0	574.6328306	0	0	0	0	0	0	0	0	0	604.9782237	0	0	0	0	0	0	0	0	0	0	0	0	0	0	0	616.4287634	711.4221241	0	0	0	0	0	0
PI(16:0/16:0)	1038.571566	0	2092.299209	0	1045.437412	1567.492536	1027.893762	1566.971076	0	1552.25985	1733.2419	2053.7321	1996.411232	2041.901792	1595.163806	0	0	1005.046951	0	0	0	0	0	0	0	3734.38753	0	0	934.3363489	333.1461702	0	0	512.7002744	1880.313357	0	0	0	0	0	0	0	0	0	0	1004.257846	0	0	0	884.0639704
PI(16:0/16:1)	0	0	0	1051.092893	1998.032181	0	0	1498.152696	1493.643527	996.9998461	1044.125724	0	0	0	2074.232044	0	0	0	0	0	0	0	0	0	0	0	1784.367994	936.0976337	0	733.5648627	0	0	1391.394405	3590.770281	0	0	2207.243294	0	0	0	0	0	1566.991393	0	0	0	0	0	0
PI(16:0/18:0)	6491.704844	6275.658666	4589.393771	5387.648396	1607.326281	9737.799509	1949.465818	3133.458421	4137.112975	0	3985.450078	1823.983048	4762.344736	2579.445433	4872.298796	3440.118746	4603.424263	0	0	0	0	0	0	0	1562.259947	5770.605131	2861.052389	1846.614334	1619.559828	3898.897839	1497.444475	6849.408595	2195.921336	1820.304627	1028.063051	3088.520585	4523.458276	2985.490491	4893.623504	2146.252822	2083.252833	3748.441814	2188.222459	708.9618312	3518.252289	0	1490.376962	3532.908869	2816.428709
PI(16:0/18:1)	2356.094365	2652.149478	4963.304029	2496.811311	1489.389196	1375.63622	0	5562.304178	2089.162413	1977.000736	2550.412656	1884.760407	3026.709056	0	1504.614002	2039.793084	1387.514086	0	0	1043.585569	0	1041.730382	0	0	0	6747.275345	4639.260289	4168.933068	1626.378067	13693.40752	5047.476933	5517.840615	6049.818154	4053.891101	0	1282.965193	2351.282401	1673.858838	5823.465436	4267.521134	2379.287185	0	1620.535891	2491.311874	0	1984.485551	2509.681178	3613.77347	1526.43472
PI(16:0/18:2)	2363.463103	4481.863525	3356.252397	3666.894443	2965.005609	3333.928444	2984.294163	4846.206338	1447.4826	11325.9886	4448.745662	10524.22419	4511.275236	1018.357929	1255.708233	2868.246509	5001.641964	1035.560333	0	2025.191042	0	0	0	0	0	5406.067635	3400.627338	10622.8337	5542.560794	10902.13158	7696.594454	2517.204062	6950.127783	14343.37633	4535.828714	1564.898024	5414.532378	3764.36069	7985.541341	4319.793978	1400.126721	0	3086.006684	2329.251401	4894.494871	2251.931915	2769.188081	1384.26925	823.7149467
PI(16:0/18:3)	302937.1589	167852.5027	173787.2134	564644.0836	260714.3561	229424.81	351340.9705	165187.9402	487761.3233	545896.5132	556625.0952	313387.221	267810.6484	281865.6661	258734.9061	273511.1486	361063.2035	21853.66836	22585.1705	18782.90043	49101.87872	43683.40086	31336.19692	12310.98009	36695.9939	562106.7289	962700.6186	145054.5574	413676.5185	519118.678	254339.3125	494822.9914	259340.928	639046.9688	33596.17208	254174.3958	238862.3136	214288.7128	287984.0681	284762.9109	196928.1333	391054.6891	662833.0513	398567.1946	196471.6221	112274.7015	88189.00701	398587.5298	325754.0385
PI(16:0/20:1)	0	0	1048.06903	0	0	0	0	0	0	0	0	0	0	0	0	0	0	0	0	0	0	0	0	0	0	0	0	0	0	0	0	0	0	0	0	0	0	1518.17718	0	955.6227467	0	0	1041.035831	982.9131283	0	0	0	0	0
PI(16:0/20:2)	0	0	1033.635417	0	0	0	0	1047.557597	0	0	0	0	1565.933582	0	0	0	996.3668798	0	0	0	0	0	0	0	1564.681418	765.5874504	1053.259437	0	2086.032078	1572.402301	0	0	0	0	1044.819398	0	1041.905742	0	1539.502168	1047.891703	1835.038885	0	0	0	0	0	0	0	0
PI(16:0/20:3)	0	0	0	1508.693682	1045.183909	0	0	0	0	424.0539146	0	0	2092.540845	2071.08557	1024.813186	0	0	0	0	0	0	858.9289561	0	0	0	2643.893737	0	390.3562438	0	0	291.2971504	260.5332226	0	0	0	0	0	0	0	0	0	0	0	1566.527954	1045.368216	0	0	0	330.6049495
PI(16:0/20:4)	5717.498567	11660.48549	8487.4742	6378.74598	2753.590981	7374.486382	1979.578858	5113.340995	8116.108452	6266.115079	6231.370771	5385.99381	6297.222404	2906.656193	0	4725.885558	2808.1083	0	0	0	0	0	0	0	0	4918.244224	18382.3035	7366.248484	4320.420072	10399.56326	8380.529935	7928.592591	16613.57237	11898.96957	1610.418695	1897.606156	2566.420523	5024.546722	7499.920885	2682.785904	2539.772964	1042.61047	3563.347934	4351.337646	2413.453813	1059.848755	1404.716592	5879.156024	2125.266733
PI(16:0/20:5)	0	0	0	0	0	0	1055.679847	0	0	0	0	0	0	0	0	1057.26278	0	0	0	0	0	0	0	1456.683997	0	0	0	0	1006.03591	0	0	0	0	0	0	0	0	0	0	0	0	1028.310946	0	0	0	0	0	0	0
PI(16:0/22:4)	0	0	0	0	0	1543.067062	0	0	0	2086.760038	1023.429667	0	1559.491059	0	0	1418.784317	0	0	0	0	0	0	0	0	0	1466.08974	0	0	0	0	0	0	0	938.4092265	0	2079.948519	0	0	0	0	0	1591.017041	0	0	0	0	0	0	0
PI(16:0/22:5)	0	1499.325244	0	0	1042.074461	0	2068.674831	0	0	1454.858563	1992.999455	0	0	0	0	0	0	0	1052.365408	0	0	0	0	0	0	1866.561002	2102.78031	0	1564.072779	2139.282182	0	1568.774769	1433.049655	0	0	0	0	1021.106967	0	0	0	0	0	0	847.4201623	0	0	1046.656501	0
PI(16:0/22:6)	1565.016576	1350.099732	1594.802643	1541.155554	1042.074461	0	0	0	0	983.2988104	1042.891889	0	0	0	0	1001.462524	0	0	0	0	0	0	0	0	0	2615.975724	0	0	0	0	0	0	1414.765871	1049.412509	0	0	0	0	1560.517487	0	955.5435265	1447.692273	0	0	1541.808306	1425.998312	0	0	1057.149525
PI(18:0/14:0)	0	836.1164864	0	178.6259849	162.0896196	0	0	0	0	0	0	459.9971857	0	0	0	250.8473536	203.1119844	0	0	0	0	0	0	0	0	0	320.6180393	0	443.499666	0	318.1759531	0	0	622.0154141	0	0	419.0003177	0	659.1719384	0	0	394.7770505	0	0	0	0	0	0	0
PI(18:0/16:1)	0	0	0	0	0	0	997.096881	1570.341156	0	1037.91664	0	2345.689956	0	1025.570951	0	0	0	0	0	0	0	0	0	0	0	1393.325295	1534.335681	0	1051.985193	1558.051109	1039.831439	0	3105.5189	1695.155413	0	1055.560556	1041.896521	2099.182286	0	0	0	0	1550.699821	0	1494.902215	2006.642644	1574.526236	0	0
PI(18:0/18:0)	1033.4258	2964.508398	6959.974835	1547.853203	1758.043256	4879.955996	2063.972677	4174.503546	6616.324476	7171.854923	2723.173353	2036.339195	6694.042285	2884.332919	5256.344674	8189.269044	4432.656219	0	0	1020.164323	0	0	2054.581916	0	0	2884.859995	10959.52329	10565.54482	1555.364901	4506.509797	3412.315588	5036.247923	1994.416692	2411.242435	0	3439.485466	4158.302068	11162.2154	2263.264453	2696.902888	2019.254543	3527.941674	2592.189884	0	1181.936552	1500.764285	1015.035871	6556.463615	2549.925705
PI(18:0/18:1)	5174.020663	2085.137253	2804.560387	1513.950099	1267.249179	1839.255523	2988.581922	3521.996038	2204.962184	1176.133876	4227.71708	0	1509.035881	2149.031806	2237.806531	708.224375	4580.187692	0	0	0	0	1015.08473	0	0	0	1890.699306	4407.251652	3972.925037	7015.617816	5580.901649	2564.258888	4205.045625	5862.522029	4342.644734	1016.905209	3451.253213	2938.511517	4651.190118	901.0132932	3101.448407	2491.946014	841.0380435	1273.927497	2373.737047	0	1318.538932	1967.960279	1503.522373	1517.772261
PI(18:0/18:2)	18004.38788	12872.2374	10602.60544	2643.031758	7029.877401	8637.797739	4456.968767	15029.18889	7513.080016	5098.281733	3267.520432	3847.439021	5183.829855	17757.69309	1347.908698	4478.074353	6345.113248	0	0	2569.386967	2034.577048	0	1025.496148	0	2928.901698	7253.462756	10365.26831	10196.51274	6133.801595	21764.97829	1811.534698	13787.1049	17568.918	19891.92269	2874.285867	6805.177713	9562.594001	12233.20499	10797.11636	15905.43467	4761.190754	0	2931.760189	1586.553935	6068.951327	3379.287706	3950.029391	10170.77258	3711.613347
PI(18:0/18:3)	0	0	0	1044.396854	1044.285473	999.9492283	0	0	1033.658187	0	0	0	0	2006.461354	0	1021.173564	0	0	0	1044.838837	0	0	0	0	0	0	0	0	0	0	0	0	1042.96217	0	0	0	0	0	0	0	0	1490.530302	0	1041.310249	1038.162278	0	0	0	0
PI(18:0/20:0)	257031.3903	554771.7318	515438.0071	323544.2417	654921.2157	621205.5042	376130.7074	617113.6924	556560.0287	423952.488	405838.8005	437867.9508	545276.7867	264629.272	452890.6306	533401.1625	309010.5627	6483.202158	11080.93849	11136.46721	12168.31427	12222.9067	22961.98585	17008.50372	30772.94635	709743.3682	698305.7677	324231.2561	269792.1365	744868.8511	562801.9646	639269.2359	701744.8876	479258.6	9500.447503	519706.9975	605369.2793	479699.4108	531747.7519	171301.2049	337863.9197	764014.9965	725973.6314	312743.0431	322515.3677	138901.5945	80538.90684	336026.1345	437838.7313
PI(18:0/20:1)	0	0	1046.794858	0	0	0	0	1500.326193	2082.515001	0	602.8799941	0	0	0	0	0	0	0	974.6800959	0	0	0	0	0	0	0	0	0	0	1049.517764	0	0	0	602.7781375	0	0	0	0	0	0	0	0	1079.350174	0	1039.910114	0	0	0	0
PI(18:0/20:2)	0	0	1054.056133	0	0	0	0	0	0	0	0	0	0	0	0	0	0	0	0	0	0	0	0	0	0	1586.776058	0	1573.611384	0	2399.192757	0	0	0	0	0	0	0	0	0	1571.199519	2581.210103	1000.34414	0	0	0	0	1552.26217	0	0
PI(18:0/20:3)	5203.859776	2578.201172	7252.649187	0	2074.727854	1535.028891	0	1114.997984	1222.53648	2697.156704	4664.151908	762.4319409	0	934.9907145	0	2429.727975	1464.519018	0	1552.255393	0	0	1046.55831	0	1562.205018	0	26227.68983	21943.36041	5353.659254	14005.48018	15667.82493	9832.191425	5493.253358	4685.164212	2218.219124	2037.328009	3147.487379	1911.422657	4434.325071	5113.988672	4297.116329	4507.734628	1438.985347	0	925.6023339	5566.473019	0	4014.287955	2602.758594	1426.510238
PI(18:0/20:4)	0	2245.441613	0	0	0	0	0	0	0	0	0	0	0	0	0	0	737.0837048	1027.510304	1687.550028	1555.454899	0	1052.347547	1053.857717	1567.571678	1421.102335	30978.34769	55250.30868	26235.78542	87910.21056	193979.9137	91991.63532	95994.23436	85925.13115	35206.06158	18259.91715	12646.58796	46461.87314	67358.68034	44627.1513	77500.58718	12931.43468	4468.171992	9953.128485	6086.586948	16446.04357	5838.830845	4052.621253	16184.66482	11013.96248
PI(18:0/20:5)	0	0	0	406.7482078	173.5814158	0	248.3496281	923.9345451	0	0	0	0	291.6487617	0	341.1005653	0	0	0	0	0	0	0	0	0	0	201.0778514	368.1639283	204.1812163	0	0	0	0	0	252.2133592	0	0	0	0	272.2070282	226.1234374	295.3814905	255.8243608	319.4236165	0	0	0	0	268.8841848	0
PI(18:0/22:4)	0	0	1011.576006	0	0	0	0	1015.236493	0	798.069362	0	1526.601798	0	1026.539554	0	0	727.1633892	0	0	0	0	0	0	0	0	1474.772316	2517.559757	1573.680785	1559.665187	0	2924.817222	1038.537292	1212.140908	0	0	1548.061075	0	1366.847232	0	1250.032474	2792.529829	0	0	1293.159956	0	0	1470.629134	1027.806851	0
PI(18:0/22:5)	3641.469591	1001.48203	0	2088.108495	977.5217967	2319.328069	1873.32924	0	1502.406623	0	1563.24932	1043.564639	0	0	0	1044.414818	1549.056337	0	0	0	0	0	0	0	0	1458.494244	2130.937091	1386.90887	0	1460.524107	0	0	1027.711602	0	0	937.9243748	0	3115.162649	2594.554413	1011.225611	0	1057.467235	3788.379527	0	1051.92004	1020.179943	0	2236.019748	1053.948587
PI(18:0/22:6)	0	3688.576225	1364.296047	0	2732.799107	1057.016077	0	0	0	1564.760636	2574.906534	0	4205.7207	0	0	0	0	0	0	0	0	0	0	0	0	2432.891004	3129.25656	2096.013405	1052.797872	2873.485698	1181.31119	3655.283112	1753.387203	1445.237191	0	0	1565.368392	2812.334763	2224.489565	0	0	0	0	0	994.5888214	0	0	1879.325039	1019.343412
PI(18:1/16:1)	1425.60781	742.3460237	0	0	1581.826519	1006.99632	0	2100.491224	1003.44814	3908.759648	3022.628091	1728.359619	0	0	0	1517.29698	1007.077728	1042.358003	0	0	0	0	0	0	0	1073.218065	2511.896628	1289.607754	2121.598224	1927.441056	1010.034789	2688.903458	1432.890992	2467.167314	0	1144.099263	1181.779709	0	2326.122662	1049.517764	1037.889698	843.6440318	0	1859.788195	0	0	0	917.0190653	1049.656444
PI(18:1/18:1)	0	1394.207495	0	4234.429191	0	0	0	0	0	2743.389221	0	4490.235866	1044.408498	0	0	1937.993788	1581.01492	0	0	0	0	3119.000716	0	1559.807955	2100.492248	2042.901809	3742.256834	2975.936308	5392.470553	8383.027398	2151.191961	3570.079858	3080.060534	3159.465626	0	2603.093055	4301.527175	2270.729261	6259.653754	3867.702883	1447.256508	1026.656036	715.7574884	0	0	2947.055541	2451.899091	3681.824165	2082.205596
PI(18:1/18:2)	3097.29823	1412.516772	0	1067.958017	0	1332.607469	0	1762.998931	1355.513883	1888.495134	0	0	1785.657953	1067.879093	2944.97245	946.8838345	0	0	0	1044.838837	1559.025589	1415.861178	1012.93611	0	1074.506179	3731.980662	7022.51468	1071.76606	2420.310816	2970.300884	0	10614.74656	1267.099847	2891.87358	0	0	2840.102011	1305.10318	3190.356905	3114.265306	3649.867355	2176.426557	2919.16871	2600.613573	2166.81087	1731.075264	2435.00946	3918.298826	2362.771679
PI(18:1/18:3)	0	0	629.7231591	948.5515472	1049.499639	0	0	0	1576.959982	988.7353416	281.475311	0	0	0	0	0	0	0	314.888435	0	0	0	0	0	0	0	1518.882451	354.7345892	1314.094915	0	685.3912207	0	0	845.0362785	0	0	0	0	333.1654468	0	0	0	0	0	0	0	0	0	0
PI(18:1/20:1)	235.7821785	0	0	324.3372137	173.7570191	274.4476786	215.4421105	0	911.7770961	0	0	0	349.330239	0	0	0	0	0	0	0	0	222.063225	0	0	0	0	354.4361038	417.7387617	0	0	208.8358595	659.5686632	222.342749	208.6664005	337.0119494	0	248.4032297	0	0	0	0	0	0	197.6225663	0	345.9541544	0	0	0
PI(18:1/20:2)	656.2438888	346.173338	0	669.3565272	326.2387664	508.9179207	0	0	169.3274089	467.7457865	300.3402607	169.3095145	253.7237947	0	0	162.4975426	1197.120118	0	795.4736284	0	0	0	0	1001.109809	0	0	0	0	221.7972507	0	0	0	0	0	0	0	646.0379637	226.7000437	0	215.2450725	1049.609262	0	0	0	161.3841003	0	201.8969805	0	0
PI(18:1/20:3)	3158.694634	2349.876278	3123.606621	3865.522986	1789.682476	6326.765451	2372.519911	2955.881085	4080.1549	2429.49322	4692.602069	3804.799731	1553.75748	1892.613496	2141.968191	3308.106801	2161.080368	739.3855985	1170.887187	1439.213811	948.7611037	1038.735172	1114.825366	1163.981746	1117.011944	4122.316181	5572.324067	2892.460022	3835.816732	3630.090922	6512.544699	3975.294289	3869.130552	4321.306062	1183.092233	4303.122112	7672.899179	5418.79395	3276.868069	3408.489766	1643.508733	2453.29923	1325.1096	2492.459427	4746.432117	2971.0817	2187.277102	1659.497371	1461.225074
PI(18:1/20:4)	3503.00822	2469.27179	2289.166983	1918.939236	527.9238874	2279.512165	3301.58783	0	641.9421755	2095.072394	2308.137986	1864.064396	1034.579887	393.2233537	1862.313223	2246.750651	2582.003645	1053.254816	0	1047.002365	0	1458.308143	4201.498657	1448.137206	2883.162611	7072.429055	4038.973254	1892.0219	7125.948121	3307.902168	4318.785394	7023.512735	2843.728701	4231.199636	0	4763.01663	5893.609208	10234.0278	3009.962263	4252.91779	2240.446649	2964.092939	1993.047621	2481.762668	3840.645366	2468.93133	2572.62532	3113.375946	3135.957916
PI(18:1/20:5)	247.3390446	159.5488254	155.1154863	0	184.3188463	0	0	309.9942228	186.3613602	350.0271301	166.5115624	392.1131101	313.1857177	311.876732	331.4676986	0	257.3357088	0	0	0	226.7235397	0	0	0	638.3635398	183.6400668	198.9591724	0	379.2677143	0	0	0	189.3745437	169.5487765	0	0	288.1451788	163.6789139	0	375.0507685	0	332.4597245	602.5216343	0	0	0	0	317.5842656	193.2662487
PI(18:1/22:4)	1013.628297	1007.111362	2018.699857	1007.129323	0	988.1012086	0	1483.158905	0	1525.773407	1547.834884	0	0	0	0	0	0	0	0	0	0	0	0	0	0	0	2371.242021	2358.842535	0	0	0	0	1545.203413	2604.651741	0	1532.442079	1512.552941	1924.382799	1902.105569	1535.386547	0	975.496283	0	1580.766881	0	0	0	1076.790355	1039.38756
PI(18:1/22:5)	833.6374898	1372.015838	1558.369844	1602.743344	1777.810374	1621.859722	1482.378711	3114.955842	1153.612632	1205.277098	650.8557299	1753.946316	2286.056587	1617.197199	1910.39861	1492.305929	0	0	0	0	0	0	0	0	0	1049.267437	1705.165432	1572.929792	2055.68457	2084.885511	1283.790381	2147.590163	1410.480058	2019.696594	0	1393.453491	951.1881684	836.5708892	2576.582219	1591.373907	0	177.918733	1668.513809	948.2323068	987.0664729	0	0	1105.644242	1396.248274
PI(18:1/22:6)	2663.953515	2697.05148	4021.247559	3552.710511	2220.824698	3175.151062	1851.005847	8021.372787	2282.660622	2836.931693	1454.175673	2947.126159	2603.266787	2679.724559	1413.448677	1300.081532	1851.0865	0	0	0	0	0	0	0	0	0	2909.338147	1955.466244	1381.772967	1261.996944	2835.607251	1977.01691	5300.582326	1117.47326	0	1404.519291	1977.345646	1923.59967	0	0	0	2010.963254	1152.857665	2496.672979	1391.530072	2387.661863	0	1034.530621	2175.170877
PI(18:2/16:1)	314586.3759	252765.5291	349756.7236	258334.6531	242985.5008	297567.7007	273709.4442	372650.3649	244517.3798	238135.4314	242239.7601	271883.0355	353198.7548	262207.0313	304952.7538	287575.331	258764.8787	7418.199085	8728.127806	9842.088974	13341.05942	13819.10117	16798.88095	13055.49083	27994.73376	129060.4909	229384.7747	116674.6598	253622.6802	197364.0701	163603.072	274808.7166	161569.0075	94694.85396	9886.852465	95889.11412	297437.9414	213814.4788	257516.3656	163984.4491	108208.7682	178002.656	195451.2235	235604.231	152474.7258	64519.96808	40174.77272	154384.9394	178602.3563
PI(18:2/18:2)	9602.95914	12375.65809	14862.22058	7286.318404	4768.440517	8521.571225	3780.578689	13938.06142	2836.333186	7263.844599	7544.681467	6550.796294	5560.206313	4435.510628	7033.875814	3516.343134	7484.422955	1031.18899	1012.535921	0	3584.683257	1580.64137	1191.69973	0	2058.555921	694.833121	15021.77752	2951.572073	8624.380661	2904.3247	2340.288371	9555.542458	3521.538172	2278.331702	1514.55064	2495.91958	4042.355426	13297.19412	3402.069772	8448.297677	0	3326.059991	7750.721992	1325.828372	997.4435536	1273.421626	2243.407087	3238.157605	5786.334516
PI(18:2/18:3)	0	344.9905516	0	487.2791435	0	0	237.4711067	328.8654794	220.9322301	0	0	0	0	0	316.1451278	0	0	0	0	0	0	0	0	0	0	0	294.9399882	0	0	0	0	252.3776622	0	0	0	0	0	163.7011612	0	0	0	0	318.2557152	0	316.2029015	0	0	303.3862709	0
PI(18:2/20:1)	0	0	277.2941406	0	0	0	0	146.3359486	0	178.8518769	0	0	0	326.8762707	0	661.6343976	496.0507873	0	0	0	185.9129729	0	0	0	0	0	0	0	0	0	0	0	0	0	0	0	0	0	0	0	0	0	0	232.0381436	144.7716596	0	0	0	493.8369144
PI(18:2/20:2)	0	473.4841997	288.8225978	0	0	0	0	0	243.5938613	323.6261344	0	360.4580987	233.4073907	296.5566574	0	0	0	0	0	0	0	0	0	272.694172	0	212.1338873	0	0	0	160.4981436	0	0	316.784049	338.6846197	0	0	0	0	0	0	0	361.8381659	0	0	0	0	223.1188447	0	0
PI(18:2/20:3)	1504.715657	1413.089393	1192.193729	1433.897232	0	1663.973283	1661.955096	1744.157927	0	2199.693771	1200.818876	931.4354666	1111.434669	666.8236643	0	1566.52167	0	505.8243405	692.1834884	1189.03459	471.0512927	1181.997018	821.3068213	813.4292328	1374.57248	1543.434316	2031.015562	556.6464263	756.8618257	1339.221923	2470.982917	803.616043	1227.067715	1122.194885	1356.556292	2028.305738	753.6607741	2032.251818	2657.218367	809.3920704	2353.930177	2016.96346	858.007012	1409.033765	1794.191749	952.3057832	1255.311432	2682.973844	2347.82296
PI(18:2/20:4)	15912.89454	24214.12147	28931.01776	20350.06866	22734.64806	22474.24449	22416.00353	28621.96949	24791.38197	14036.79901	16345.12284	19390.0336	12850.82757	23794.91033	10681.66356	11634.69492	15281.44748	0	0	567.4888546	0	0	1124.773541	2156.922882	2950.501889	10711.70999	14609.52571	12471.8872	67732.62606	22221.53846	10620.42744	13768.61962	20046.1818	15340.82331	0	12046.78635	16980.75211	17461.34987	17146.78269	13196.4182	9731.091804	13493.35095	8569.188183	22453.19999	15481.70784	2160.830462	1400.904361	15306.57949	19183.14616
PI(18:2/20:5)	249.7417205	503.4307215	503.4874687	748.2424563	359.4116195	408.3864714	504.895153	503.3408985	0	231.480646	0	711.9469426	0	180.3602322	953.5449612	0	465.7540985	0	0	388.4780882	0	0	0	0	0	577.1321567	0	0	0	0	0	0	0	0	0	0	0	0	0	0	0	0	1221.847428	755.7220303	0	0	0	0	318.9001883
PI(18:2/22:4)	2222.020662	1479.33436	2373.851871	763.8652761	1129.164535	919.2499695	2824.995247	1148.3569	1241.474162	581.7679854	0	2767.38572	1001.789164	2430.254234	0	0	3070.802389	0	0	0	0	0	0	0	0	0	0	0	0	0	0	0	572.5187932	0	0	1081.115412	0	0	0	0	901.0498219	880.0582758	0	1997.069804	0	0	0	0	0
PI(18:2/22:5)	829.5228271	1662.066295	2211.919513	1542.691766	0	436.496532	1746.706118	1010.12716	1675.042744	1113.780622	482.9206206	1308.785646	1492.66434	958.0983526	1587.973424	3152.000546	1230.540107	0	0	0	0	0	0	0	0	2445.382202	1352.295385	1074.698177	574.3948881	1057.30694	2194.214723	822.5801448	2408.790152	1790.782095	250.5084738	1578.637849	0	549.3505158	840.8920189	841.4589185	1070.739486	1819.791214	1379.228584	1223.523576	669.6404327	0	1598.009426	600.7227114	1074.963023
PI(18:2/22:6)	3120.834776	5416.625002	3001.210286	2926.391712	2253.571204	2019.142739	2406.928343	4534.66684	5550.101855	1797.02742	1814.97328	1723.572593	3685.535322	1649.324008	7450.749542	0	2307.837051	0	0	0	0	0	0	0	0	890.5178234	1162.654328	0	2418.552909	1161.813528	1537.499824	1859.542013	1922.75571	0	0	2248.942247	4378.841079	1612.798318	3110.685727	1098.411129	894.6493031	865.7352946	1723.444359	833.1717083	1390.132432	0	0	1417.768771	836.2483782
PI(20:0/16:1)	3600.947523	6298.399253	9214.81291	7585.910399	8697.829399	13527.62573	8062.376032	11690.02659	16239.84758	3863.825713	7930.442994	8920.051428	14792.3891	6791.775657	8679.678414	8015.006571	5166.74366	0	537.0589926	1100.1126	0	785.8272737	0	549.728482	0	7259.829746	8640.507116	2648.73871	2741.064547	12793.30511	4102.2857	11522.50621	4828.039188	5791.274869	0	4350.875626	8713.28997	6045.297048	6891.980512	3548.039511	1693.241738	6730.021274	5774.178615	1327.140402	2078.879003	1434.273333	2256.286915	4167.945433	4704.220579
PI(20:0/18:1)	55597.18422	66606.3544	80237.43763	71931.85196	61647.74612	96308.33545	69002.00938	102755.2569	98263.00315	39528.82604	64524.85716	61415.65217	122979.2478	45026.14389	66070.33641	86044.93081	49844.84251	804.8105869	1092.026202	259.767357	801.3981227	1353.802039	4855.586774	1622.090148	10409.9955	46623.99687	95037.29859	32057.24519	23215.8593	72957.55653	52285.93683	77862.06596	44543.3324	43907.88788	1474.321975	36726.46303	86820.79319	47653.70834	55151.45088	26960.67699	41304.45806	62423.76596	44238.66233	41650.6767	40033.10222	16990.73485	8211.338879	41268.76822	45693.83428
PI(20:0/18:2)	27572.11799	20813.89973	21607.24263	21485.56571	12532.31421	34965.43753	18554.93047	22719.71692	17857.61065	16362.16278	16997.53218	18432.70682	32291.46032	16538.88412	22912.18965	32260.1317	14515.16338	536.2832699	260.4824253	1339.613809	1074.069369	1868.20115	1048.489074	224.6772944	2146.308075	15400.78	20218.25641	2459.325704	12298.52773	20472.99556	9157.072464	35797.74348	8066.728871	3983.665309	0	4093.136596	19902.13183	13056.24046	10669.15908	8081.431115	4638.82739	11638.44553	14008.86744	9131.895256	6122.158382	3630.222484	3333.750301	9913.949776	13503.39811
PI(20:0/18:3)	0	0	0	1059.888027	0	0	941.5552141	0	0	1242.820114	2290.442225	0	0	0	1330.347981	874.1348198	979.4531525	0	0	0	0	0	0	0	0	868.7411894	592.0099157	582.1033115	0	0	0	1242.835958	0	0	0	0	0	0	0	0	558.2316699	0	0	0	0	0	0	0	0
PI(20:0/20:1)	4101.963263	8602.555463	0	4716.301497	4153.952567	2716.503807	5889.286905	2852.167185	10617.78198	0	1955.78232	1932.666228	6522.415389	791.8391119	4172.945954	1383.469924	1053.201459	0	0	0	0	586.399552	0	1132.233506	897.3226773	3557.948217	5656.916951	2618.68122	1152.739358	2895.910331	7185.922904	3638.810307	3433.346153	0	0	2665.560239	5823.960544	5162.814617	2901.710579	1917.695326	0	3519.141503	1732.779537	2283.496407	1391.896626	865.733051	0	4450.396031	3458.466278
PI(20:0/20:2)	4712.668408	2043.979929	3377.644866	2429.470933	1378.333775	2596.566404	3131.032056	868.1801407	1827.722928	2711.542544	3203.632148	919.2499248	1731.856839	2724.50534	0	3248.14867	2232.405157	0	0	0	0	0	544.9278467	0	0	898.4154855	2827.278556	590.5603157	1105.499952	1611.700025	1244.769955	5342.535054	3032.194104	1147.169992	0	0	5596.451599	2336.533258	0	2491.305033	901.0498219	1736.280875	1154.507693	2791.176763	0	834.9436348	0	2259.967345	1949.670904
PI(20:0/20:3)	791.741976	0	1267.208812	2306.279357	1733.494778	1674.628815	1461.896645	3888.151326	2453.461976	868.1623247	1684.350511	4177.182254	4005.546236	1011.345705	1717.636303	2558.689497	1450.560759	825.404482	0	0	985.1951351	0	879.1619626	544.9499365	0	2124.443496	3213.697147	0	1387.912905	2277.974944	0	2530.989499	1971.39694	1792.825128	0	1789.851304	1372.955474	1806.922839	1419.144434	0	1230.941354	6097.35772	4393.267992	954.7208109	1679.758432	845.7462278	0	971.6501574	1858.094178
PI(20:0/20:4)	1755.783176	3319.954358	17944.98689	8172.787218	11809.79528	9507.542976	8232.70717	8848.929154	4600.406045	5567.561129	5321.359394	2836.576385	12117.10094	8787.050123	7361.785099	12587.84987	8229.087935	0	702.9472619	0	0	0	605.7907239	0	0	12727.53828	17037.49451	4457.154699	7894.377398	12657.46811	4930.783003	12912.84326	3350.703158	2803.398302	0	4847.235971	2951.327974	7827.990028	6849.69066	7074.614775	2734.915523	4859.640702	5271.039477	3692.259452	7808.535458	1328.994201	0	4129.087013	4855.82931
PI(20:0/20:5)	0	0	0	1185.471378	0	1533.539454	0	0	0	0	0	1563.371133	0	0	886.6853606	0	0	0	0	0	542.6649987	0	0	0	0	0	0	0	0	0	0	983.7172973	0	0	0	0	0	0	0	0	0	0	0	0	0	0	0	0	0
PI(20:0/22:5)	0	0	0	0	0	0	0	0	564.2703453	0	0	0	0	0	0	0	581.8471847	0	0	0	0	0	0	0	0	804.0444688	558.4842392	0	610.7153772	0	0	1863.234021	1209.569156	1086.051852	0	637.637382	0	0	911.1772143	0	0	1186.006769	0	0	0	0	0	545.2183481	2446.473524
PI(20:0/22:6)	0	1496.758025	0	0	1762.594351	1031.989373	0	1713.320896	1166.956763	0	0	0	1517.80595	0	0	2382.066225	0	0	0	0	0	0	546.7994225	0	0	0	0	0	1417.838375	0	0	0	0	0	0	0	0	0	0	0	0	904.494753	577.8499305	0	665.1068306	0	0	0	0
PS(14:0/14:0)	0	0	0	0	0	0	0	865.2150155	0	0	0	588.0670898	0	0	0	0	0	0	0	0	0	0	0	0	0	0	0	0	0	0	0	0	0	0	0	0	0	0	0	0	0	0	0	0	0	0	0	853.9174415	0
PS(14:0/18:1)	497.3618751	490.2917497	0	0	0	0	0	497.2659369	0	729.4996289	497.1824752	257.935392	233.4956186	483.5449665	0	0	745.8742484	0	0	265.8617775	176.2351097	0	0	660.4994698	590.9401584	1041.271109	871.2023222	841.5599311	0	0	846.6732765	561.3728844	512.1740979	794.4530916	835.9723326	441.3037861	175.9525329	0	0	0	1458.660615	1528.770044	3633.833287	481.8803951	0	498.3769051	0	0	194.5739312
PS(14:0/18:2)	6673.998162	4065.201954	7565.423865	4145.885692	4360.434945	4934.524311	7262.015002	5528.185011	4336.434617	3416.189661	4614.656129	6145.337302	3636.549801	6076.451113	6953.105164	5205.671357	5501.451677	0	0	0	0	0	0	0	0	1845.391831	6084.030395	849.5571663	2068.556123	3994.185089	2277.274326	2636.980361	1178.572458	1707.864258	0	2060.966316	3172.322626	851.7202474	852.6793165	2555.329908	2912.473884	2121.442175	1803.630937	3831.906674	1196.587955	582.4239551	0	2924.097264	1825.014098
PS(14:0/18:3)	0	0	0	0	0	0	0	0	0	520.2983888	0	0	0	0	0	0	0	0	0	0	0	0	0	0	537.1941959	711.802317	0	0	0	0	0	0	0	0	0	0	0	0	0	0	0	0	1181.015088	0	0	0	0	523.0224044	0
PS(14:0/20:1)	0	0	0	0	608.9315021	0	0	0	0	0	924.396531	0	0	0	0	0	0	0	0	0	0	0	0	0	0	0	0	0	0	0	0	0	0	0	0	0	1830.956819	0	0	1077.975018	0	626.1648566	0	0	0	0	0	0	0
PS(14:0/20:2)	574.6313982	589.7752967	551.2217576	0	0	0	0	0	0	0	0	0	830.9445921	0	0	0	0	0	0	0	0	0	589.8630214	0	0	785.4783871	586.4273718	0	0	959.9765821	0	0	0	0	887.701856	0	0	0	0	0	0	1180.804749	0	0	0	0	0	0	0
PS(14:0/20:3)	0	934.1905901	3502.235834	2355.471245	0	2047.956053	0	0	1007.111361	0	1005.929829	997.1956757	971.4912258	2509.262816	0	0	0	0	0	0	0	0	0	0	923.3855009	0	0	0	0	0	0	0	0	0	0	0	0	0	1375.511907	0	1393.342373	1577.29243	0	1511.518971	0	0	0	0	0
PS(14:0/20:4)	14183.05839	9047.158036	17721.23567	15077.4478	1705.55993	14136.96545	10557.93247	24215.01199	11156.0002	11135.15828	7785.965749	8881.441249	8144.59753	7376.701306	11051.03955	9958.09294	6845.999421	2070.864867	0	1513.373555	2248.632238	1041.648266	999.4863194	502.1574374	3502.725903	4372.561821	6984.523604	7273.655798	5775.838898	7203.765083	3799.326139	13100.97132	5371.769657	10186.45502	0	7158.590495	4478.361005	11572.18384	5974.167593	4114.368206	5535.838996	4182.076148	7299.096936	7338.774983	0	4047.979938	7052.422226	7971.868766	6297.099151
PS(14:0/20:5)	0	1002.683261	2954.489799	0	1537.835647	3501.034691	2308.46408	3131.580409	1044.159864	0	2537.993154	2048.493055	0	0	1596.379165	2562.390848	0	0	0	0	0	0	0	1015.933617	1505.817652	2589.187356	5732.863079	0	1013.902592	0	0	2067.959574	0	2620.645623	0	1041.64283	2073.799818	1570.66114	1049.122943	2091.750897	0	1568.332284	0	2514.03523	0	0	0	0	1549.527031
PS(14:0/22:4)	0	0	1959.474354	0	0	1426.73493	2020.13135	1342.751715	0	2632.775802	983.7276107	0	1542.958418	3091.147018	2020.645055	2047.740789	1526.322406	1546.01048	0	0	0	0	0	918.3288024	1014.997756	3145.002015	2483.41317	2584.578986	0	0	0	1550.646535	1405.211873	1953.166187	0	1557.779199	0	1540.400729	0	3617.448592	0	3136.811455	1044.518903	0	0	0	0	1762.704611	1521.616603
PS(14:0/22:5)	853.9443075	0	0	0	242.1939848	0	253.1410501	421.5926572	0	0	280.1409467	525.2218502	0	0	326.9980854	249.908535	0	195.3745419	0	0	0	368.3358618	0	0	0	6385.739414	0	370.4237931	450.6690324	1274.206348	374.8773178	1062.496724	413.0447512	209.151467	0	442.5186455	0	396.5514707	277.3801964	411.2407301	1330.901598	1407.438214	3185.736838	662.7570992	0	261.3397841	258.2953261	133.1827688	257.9978286
PS(14:0/22:6)	0	1555.768544	1058.43218	2029.404759	1996.992608	2940.314475	1501.320172	1929.488463	1673.941826	0	0	1627.862591	1809.083893	1102.183429	1006.139428	0	2040.60334	0	0	0	0	0	0	0	0	0	993.8376807	1225.340496	2218.043633	0	0	2488.871336	0	956.1817975	0	0	1198.20054	0	0	975.7251957	0	0	0	0	0	0	0	0	0
PS(16:0/14:0)	582.3472448	0	0	0	0	0	0	0	0	0	0	571.8567394	0	0	0	881.6995588	0	0	0	0	0	0	0	0	0	0	0	0	0	0	0	0	0	0	0	0	0	0	0	0	0	846.3167024	0	1468.483121	0	0	0	881.3519522	564.336507
PS(16:0/16:0)	1156.64773	881.5299355	4632.362781	1330.864476	1469.763151	2643.82853	2056.1767	4114.962198	1163.858694	1457.379913	2033.587538	2900.438397	1985.801901	881.6535946	1751.371412	1731.019088	0	0	0	0	0	0	0	0	0	2385.853267	0	873.1499147	0	0	846.0730948	2247.434051	1296.428504	819.9295197	0	1308.405225	0	849.8843996	1121.748467	0	830.8161496	1190.622132	0	1181.541072	0	0	0	0	0
PS(16:0/16:1)	0	574.9736367	1130.946612	0	0	588.0950258	0	0	0	582.4093361	0	0	588.1043447	0	0	0	1454.508757	0	584.0706482	0	0	0	0	0	0	0	551.9501923	0	589.086841	0	0	0	590.0005458	0	0	569.046395	0	0	0	0	0	879.1963398	0	0	0	866.2056384	0	586.8448596	1465.616234
PS(16:0/18:0)	8598.991972	23900.19327	36318.02306	17670.14532	12897.32833	10524.66686	18495.51225	54560.58341	12689.95787	16159.99451	13748.5772	8649.850937	30787.47887	5122.002568	19778.21258	19249.25432	7948.839265	1049.796843	5724.745291	1042.954168	2496.873008	513.5490256	4167.694006	2087.101494	7268.197454	21061.17609	19385.15084	8719.440589	8632.684991	9762.276646	11291.46053	24919.03184	12166.93448	29679.98891	4189.078309	11024.91892	18296.26544	10842.85674	60831.25224	5708.914168	7026.984389	9431.015029	11416.33189	22369.1933	5601.050806	7303.177689	4696.440728	7794.409394	8291.990254
PS(16:0/18:1)	5955.27949	2020.672877	8182.563016	1583.843732	5468.453883	1227.818612	8246.427881	4481.263842	602.3043575	1562.561341	4049.997288	0	1426.985657	1911.998975	1971.246325	2630.643696	3774.229766	1052.731964	0	0	1054.126969	0	1023.15925	0	0	2061.78292	6814.853339	0	1986.630464	5733.918064	2058.416969	5721.488456	3287.704252	3123.992683	1576.302092	5049.5792	2082.668545	2164.541013	2357.490457	2573.498576	4105.126345	2915.80846	2277.750043	2493.400896	4066.674065	1495.461825	1248.745657	3359.446427	2196.274698
PS(16:0/18:2)	6014.437912	3208.293306	2677.641025	3160.634068	1985.183873	8854.505307	3515.805915	4530.382793	4077.797069	3455.113272	3377.88673	5922.871361	6475.557397	1497.077891	5069.686132	1474.959648	1695.404748	0	0	1077.896144	0	0	0	1009.839471	0	4517.357512	2020.913073	4116.406169	3863.34692	1544.405821	992.1384966	2440.721061	2015.172679	2909.610601	2569.386967	0	2528.176791	4815.336697	1992.256746	2545.815226	2022.500703	4681.843493	1408.443091	4182.292484	0	0	1864.425883	2883.366332	1965.590658
PS(16:0/18:3)	0	1170.39893	0	0	0	0	0	0	591.3684451	880.493831	580.7832798	591.3055743	0	0	0	1111.48572	0	0	0	0	0	0	987.8237349	0	0	1568.454127	0	0	0	0	0	0	0	846.1342107	0	536.1860878	0	0	0	0	0	0	1103.413159	0	0	555.8799785	0	0	0
PS(16:0/20:1)	0	1496.108263	2733.053794	0	1041.662624	897.3402177	1246.908038	997.1814516	1235.056489	1264.858198	4675.191292	0	3729.308396	1102.188091	0	1374.259917	999.2692742	0	0	0	0	0	0	0	0	1234.099936	0	0	0	1458.222147	987.4615789	0	2361.141169	0	0	0	2225.608521	3890.543868	0	0	0	0	1560.712397	1263.359718	0	0	0	0	907.338601
PS(16:0/20:2)	0	0	0	0	0	1040.709011	0	1151.718795	0	1367.18615	1107.655433	0	0	0	0	0	0	0	0	0	0	0	0	0	0	0	0	0	0	0	0	0	0	0	0	0	0	0	0	0	0	0	0	0	0	0	0	3059.338973	0
PS(16:0/20:3)	0	1123.211068	3633.00702	0	1992.464673	2866.112313	1570.820968	0	0	1692.832604	2389.303964	1567.235719	2324.6654	1026.023786	0	2598.737496	1580.904947	0	0	1040.945694	0	0	0	0	0	0	1879.308988	0	1381.286201	2023.19662	0	3588.127559	1037.077885	0	0	0	1558.274569	0	0	1552.308402	0	1531.272772	0	1044.825098	997.2290765	0	0	1848.74911	1002.618828
PS(16:0/20:4)	12680.68917	5936.766471	25609.74489	9382.582946	11783.61673	23359.8521	8332.459141	22142.79152	9868.248688	28405.12767	17912.53192	14972.11671	12564.07537	7922.472233	17529.58109	20404.17492	8094.409155	2083.904061	987.5520154	1009.240446	1035.540804	500.8312636	492.4764174	1038.99263	2150.88688	19905.31026	22393.41444	6277.644126	8828.440325	9645.063019	6980.764456	12246.89688	7653.367889	4312.170561	1042.668722	3993.808975	9241.511273	18215.28866	9354.278388	8138.312793	2059.125096	13660.73699	3978.874964	12134.29701	7095.017845	4532.826165	3036.70398	8253.978456	2666.293132
PS(16:0/20:5)	998.2153294	1519.581058	2054.4047	2069.971718	0	1562.480046	0	2316.913673	0	1584.910433	797.7996655	4139.273929	3633.875301	1516.884951	1544.114521	2184.99332	1033.635461	0	1561.513564	0	0	0	0	0	0	2299.424888	1533.951996	1547.004161	1408.083474	1561.607368	1912.056704	1540.342237	2547.059618	0	0	1515.128958	0	1550.850832	1016.317649	2080.880675	0	0	0	1564.666906	0	0	0	1403.476334	0
PS(16:0/22:4)	1196.115167	0	2546.411062	1021.191592	1211.970909	1519.419479	0	821.9483288	999.3523053	1098.277748	1648.376021	1652.29187	0	1085.87979	1009.884784	0	0	0	0	0	0	0	1054.867027	0	1813.296833	1447.662621	2375.387021	0	2373.013887	1506.969869	0	0	0	2058.917449	1540.214017	1560.160262	0	1898.995434	0	0	935.0931006	2314.228607	0	0	0	1086.09293	0	2085.717224	0
PS(16:0/22:5)	0	1034.468217	1901.309442	0	998.6051528	1874.093789	1005.231343	1871.213583	996.6848396	3139.849511	0	0	1384.813422	0	1804.99671	969.6083862	718.5978986	0	0	0	0	0	1039.440702	1039.452181	936.2708006	1572.410621	2766.378165	1061.618256	0	1637.056443	1017.960792	1236.497498	0	1543.643951	1561.710793	1608.026741	3738.928037	1580.662904	1020.00164	1028.668846	2067.862217	1338.889322	4366.811288	943.979006	0	0	1469.182158	0	998.3759805
PS(16:0/22:6)	0	0	3992.952267	1494.031842	3552.542373	1818.167176	1502.385091	1000.167085	0	1212.084472	0	1557.054097	1814.562125	998.5391263	2370.919059	3998.908783	1910.531009	1017.457623	0	0	0	0	0	0	0	2088.763385	0	0	0	0	1200.309777	1730.512018	0	978.8107505	0	1559.360387	0	0	0	955.6830214	0	1454.322299	1895.775151	1856.290476	0	0	0	0	0
PS(18:0/14:0)	0	0	1211.969385	0	1006.996319	0	0	2299.367373	1509.912086	0	2021.033937	0	0	0	0	0	0	0	0	0	0	0	0	0	0	0	0	3087.186953	909.014524	1545.724992	2058.936443	2571.235552	0	2057.98717	0	1512.753583	0	1542.148731	3567.568353	0	1026.243752	440.7912632	4716.149042	997.4730552	1495.031514	0	996.0142911	0	1000.405459
PS(18:0/16:1)	1539.039879	2551.799162	2033.37976	2507.39276	1801.196688	4375.075564	0	2952.785435	0	0	5086.728099	2835.86723	1017.05869	2548.354472	2559.203326	1670.551262	2051.203223	0	0	0	0	0	2543.531638	0	940.1305141	1565.036637	6397.340381	6711.981148	4512.36443	4647.958853	4984.256639	7109.785372	3773.467608	18326.17158	0	7099.780362	1593.930143	2055.299366	4640.648083	1547.400721	0	3884.552184	4514.879123	1991.388691	2008.757703	2037.027026	2018.510206	5617.630999	2506.978586
PS(18:0/18:0)	211526.6347	267395.8636	651397.3233	230640.8893	699785.3233	485619.5959	294393.0268	562849.3273	650151.2119	527040.9586	670206.4914	336867.2116	546342.3181	243195.5559	453210.7343	548380.4298	171813.6757	51676.69627	56148.2029	31028.24148	72435.9371	32949.46173	157453.6208	33161.42255	77746.56676	505748.2502	1085389.14	564237.1195	238521.6633	490939.6558	742534.3188	685603.1035	471349.8473	910618.9034	24455.29102	855753.6946	449853.1611	647164.6679	1258779.626	155833.6957	366656.604	899673.1886	1240780.955	272338.4956	493164.5034	394938.6387	123336.76	608965.2015	347426.7462
PS(18:0/18:1)	45027.26432	41854.47406	81723.68945	69383.04297	83307.81837	89669.90152	57063.21884	99087.81214	104782.7245	65794.60044	127142.2817	62958.8831	73761.62103	47422.59507	85936.08716	97309.76285	23151.99156	10375.80733	3460.972545	8795.691799	12193.76013	16547.59578	38260.35661	9294.490391	29998.92824	53652.71646	128782.1872	62236.71784	33753.1675	78959.67015	84653.10156	120139.7814	57421.76435	102308.1096	11973.07357	84039.28669	51769.54719	116133.6553	86585.62028	37240.17898	51085.19522	98462.95861	155413.3936	39750.7343	53735.88727	30366.77713	31346.33395	82435.93676	35843.78607
PS(18:0/18:2)	10501.1791	7328.305335	18641.67771	8268.856838	10032.46721	18555.88174	11422.29482	20881.67411	15474.71117	24096.11187	10661.69011	13399.7875	25811.74343	14983.94303	11169.26385	28059.66261	15509.65057	948.0376035	1035.366116	1022.226771	5658.767943	1552.270755	3084.219848	1039.964417	4626.126535	10985.02766	21065.28204	4581.980965	10045.74894	33147.21577	11920.00617	27638.13853	11212.5333	10993.39973	1040.447318	8855.166356	21755.04373	24063.08389	19313.88518	13475.53082	9118.656359	8227.928565	21691.6989	9690.107256	8296.536902	3833.589596	11207.66316	6836.278501	6166.725782
PS(18:0/18:3)	647.5726519	627.186679	826.2153547	1876.121055	1085.176441	1648.430195	1078.713104	1171.859566	854.7456856	1143.441115	1067.347434	771.7589714	1812.907095	768.2094601	1020.544888	1198.881875	539.7352896	1204.184483	1027.574004	1660.257225	596.8471403	1776.835474	790.7107847	1525.897714	1124.276652	2224.829006	1319.843172	840.9231054	1948.67372	1116.06137	1507.236161	1524.463236	1890.592856	1983.613217	1115.573919	1625.121446	1706.719432	1621.252035	1053.487595	2155.109244	1164.039354	3007.67626	3221.246656	1608.102801	2039.13534	1103.362051	1345.881814	1633.921027	2534.052875
PS(18:0/20:0)	0	383.9792062	0	0	1827.633138	1442.674903	320.4350324	1760.153065	869.2681323	0	0	0	672.0879134	1078.242764	1248.219724	420.8846154	1306.068068	1319.99953	873.7589944	1156.607276	882.4713559	4364.566621	3066.262337	1460.076608	3493.854318	40940.52878	56631.44793	25490.44976	42428.47828	67798.62126	44863.13018	58182.54692	94223.31064	116595.68	821.1299507	60957.53749	63452.2756	51789.83869	37106.64594	17851.54879	12054.47765	58442.54919	61949.87378	34588.20799	12497.2269	26393.92089	11652.91727	35634.98116	25097.67181
PS(18:0/20:1)	1565.510434	3129.308903	3647.0068	5177.068507	3128.184158	2086.573064	3132.082099	4174.166716	8852.23969	5218.460307	5689.287168	1566.849975	4173.647662	2088.716106	3129.008739	7243.508274	0	0	0	0	0	0	0	0	921.9244461	2082.853443	14061.98484	4273.164946	1445.272427	2423.212462	5194.674459	9871.275601	5212.533523	2286.702961	0	3644.565223	4690.63582	6755.630539	2079.992513	0	1555.395379	6266.166542	2092.939009	5089.054677	7248.627236	0	0	4675.10607	1026.20683
PS(18:0/20:2)	1044.299775	1009.984599	3630.777145	0	0	2193.646168	0	2083.643776	0	6253.631407	5425.629296	0	5209.031636	1565.639855	0	3644.167642	1046.295015	0	0	0	0	0	0	1559.651422	0	1567.646574	5729.886481	0	1043.469599	5197.636512	0	2045.834164	1023.022157	1557.187725	0	1893.62768	0	3972.212887	2073.163731	2596.796524	3111.751275	6796.160244	0	0	3605.42286	1552.147201	0	2362.148924	2073.08639
PS(18:0/20:3)	742599.1197	1032425.624	573095.8678	1265832.727	825773.4037	1123296.015	946204.2342	942489.9942	1023169.884	934103.0801	1171419.093	810985.7108	1000667.963	838337.9818	647067.7345	786623.7767	910047.1098	87645.92627	104918.5908	131339.5612	162016.831	144230.3228	188253.5779	178589.7486	154248.0934	343912.8114	416186.5249	305334.5926	473426.8994	357086.7681	368327.8199	682921.3062	815075.0009	283544.9054	198682.0667	213918.1728	369266.2542	495061.5391	407657.4886	434810.8996	179873.8837	363432.0447	363487.9279	366299.972	263006.0108	299467.6452	346098.447	399540.3482	361629.5433
PS(18:0/20:4)	20757.79807	22685.7173	52831.24274	18051.16241	15844.90658	34551.08849	19106.95449	35461.33887	19395.68519	63591.67833	19055.81657	21700.97466	22837.64647	15715.91577	17048.3383	46903.5908	19138.21877	0	0	1563.598641	0	2086.019406	3646.522158	4686.447458	3075.108083	19882.05093	38180.05971	7801.652033	21605.5181	13619.01117	11976.50327	33601.31013	15827.88175	8832.718926	0	18874.67828	20055.11086	24067.05056	22882.03065	7883.982605	3524.187226	21524.23469	8763.55051	13763.13501	13018.43919	4549.192428	12518.75463	26903.85951	11004.96389
PS(18:0/20:5)	3363.733559	0	0	1229.685298	1175.036826	1828.471231	764.2999989	1063.951463	946.5103612	0	635.27438	0	0	0	0	0	867.6886951	0	930.2667378	0	0	1290.773562	0	1884.017009	1248.150278	2758.180625	1889.121104	4625.143115	770.8717054	0	0	2662.649685	2684.87768	5935.79959	0	2397.358791	1502.616753	0	0	2174.33173	1313.907976	1304.657888	1766.158662	1492.539925	1568.305373	1223.844321	1719.526295	1140.37069	1934.539092
PS(18:0/22:4)	2322.302427	4028.105465	3215.6641	2828.439098	3941.128548	2766.200216	3211.206782	1932.021177	1350.435665	3031.36783	3609.762562	3018.189941	2944.401324	1847.626339	692.4654419	3573.127996	1613.045932	799.3017925	872.9540784	788.3978427	1332.723895	2053.720366	1032.418923	766.021624	983.4263231	3766.806103	2081.178501	1734.077993	3872.653002	1886.296043	2781.457628	1773.836249	1544.117766	2170.181225	0	1919.364506	4734.776217	2937.989779	2302.812714	2636.403472	0	1080.506703	442.6667262	1617.131874	2058.819554	835.0213569	2108.897166	2820.582642	3712.234699
PS(18:0/22:5)	58189.76061	63010.83616	56858.14543	57948.34478	42976.03044	52492.75862	53397.98286	61297.28242	70859.86634	62425.26718	53928.78183	46023.34704	67405.84307	98798.141	54679.06287	99511.22837	104940.035	15071.68878	16772.75759	24167.28004	16935.99363	11881.55262	11686.70384	18863.26355	30117.9834	64608.04001	61729.1168	78849.02321	37111.8582	36373.06344	37201.82585	37032.28082	63307.00656	30913.30803	20023.31153	14348.08044	54459.77001	42965.11822	40718.88716	27758.21369	33610.00024	31371.35837	39786.42147	33758.23041	29691.4944	30399.59603	31760.29668	45096.7367	59395.79319
PS(18:0/22:6)	2965.359269	4172.207542	9566.319103	1567.352839	2600.254725	2982.580291	3302.820068	11886.40619	3237.76399	1579.701959	0	1515.19162	2202.438203	4188.890491	1530.128438	7130.120779	3615.029413	0	0	0	1043.486967	0	0	0	2066.488891	1021.689154	1564.241213	0	0	0	2056.80164	4655.933408	1030.865688	1573.31023	0	1570.274445	949.3017457	2109.842957	0	1505.166618	0	1060.020541	2188.361722	2020.210193	0	0	0	1887.587366	1009.048947
PS(18:1/16:1)	8076.447694	2240.074852	16371.9093	4273.655744	11413.77412	11017.31938	10908.29209	8526.300141	6614.249698	11128.81659	9733.92121	6201.780257	4179.061338	4728.48274	6107.255641	6515.008926	1826.533773	3150.335563	1563.569377	0	2560.405705	2019.800416	3388.52167	0	4608.739908	17285.18208	8691.825992	5117.140619	6595.047658	5110.673614	980.8906599	7357.474545	11165.58091	8985.641242	5312.427023	9689.275673	1961.566139	8209.788575	4380.353057	6166.801812	4912.90017	14905.12297	5401.653486	8398.143265	3670.853	1186.018409	4613.473968	7438.763029	4958.613503
PS(18:1/18:1)	1290.366527	5056.221015	2264.707535	5639.970819	8104.487788	4980.218668	1033.752003	4365.500124	3300.469218	18464.43554	5801.74841	4410.487923	6000.277665	1865.226162	5573.714831	729.3921914	6597.630682	1563.009698	0	0	1019.707032	0	1041.037234	2040.704645	0	2821.811833	9827.71178	0	3074.683012	3519.877878	3931.484163	9803.03807	4668.829249	4461.113245	1415.609402	6624.726579	2524.044599	2982.234504	3242.042893	3645.476016	1016.528258	4702.694026	922.6316704	6205.198947	3358.748335	2692.002636	4026.139997	4537.497456	6065.322731
PS(18:1/18:2)	24112.68393	24263.53447	27053.50699	13287.76125	13273.06453	16435.30888	8335.587216	26416.19056	8896.606803	19608.69121	12084.35381	32792.67625	29719.22518	18498.19704	17608.6961	12771.28602	6298.112492	1012.419402	1525.766962	713.6784545	2533.218334	4894.245459	490.3764339	2244.210083	1377.92767	16319.25784	9137.50132	4534.41715	12659.25951	6165.947097	2373.843751	18001.14781	1750.359626	6261.27869	0	4401.724705	10664.26054	14045.48061	7200.996907	5749.664072	6678.466529	4037.937782	12296.36562	18346.35394	1256.781172	3520.562636	6363.772072	4531.825734	5252.306017
PS(18:1/18:3)	0	0	0	0	0	0	0	0	0	0	0	0	544.2491661	0	0	0	0	0	0	0	0	0	0	0	0	0	0	0	0	0	0	0	0	0	0	0	0	0	0	582.2126946	0	736.0270661	1621.677181	0	548.9353194	0	0	0	0
PS(18:1/20:1)	2110.16077	1030.092329	999.4651542	1049.792262	0	1514.292336	0	0	0	0	0	0	0	0	0	0	0	0	0	0	0	0	0	0	0	0	0	0	0	0	0	0	0	0	0	2574.052579	0	0	0	0	0	0	0	0	0	0	0	0	0
PS(18:1/20:2)	0	0	0	0	0	0	0	997.1941525	0	0	0	0	0	0	0	0	0	0	0	0	0	0	0	0	0	0	0	0	0	0	0	0	0	998.6267526	0	0	0	1449.415283	0	0	0	0	749.6591654	0	0	0	0	0	0
PS(18:1/20:3)	3526.419397	3972.058016	6223.583765	0	2679.740495	6510.239914	3645.60454	9374.687823	1695.680331	5481.614357	3520.365668	4096.196653	3298.561736	2483.558991	5201.376777	4408.373963	3105.151624	0	0	0	1041.656496	0	1042.855565	0	0	3837.596712	15655.26465	4142.65779	1551.816784	1529.405384	1048.885796	3423.218966	2439.875708	0	0	4792.765925	1564.341728	1558.224686	1805.30425	2720.798974	1554.066168	1722.889006	2064.779707	3103.97766	1016.204183	1919.940918	0	2055.449371	0
PS(18:1/20:4)	56673.98877	68791.15811	218259.7793	69160.41544	72914.24284	114255.6376	61414.6981	138839.6727	50976.0494	129066.973	88187.98048	61520.595	74347.44433	34292.76955	58595.09846	108015.8229	54918.31984	3125.726138	3436.370594	517.39508	1042.954123	2084.971201	3419.922255	3645.236987	10785.41077	68408.33373	97048.34629	29187.25349	47528.36682	33245.50704	22140.09487	64633.04288	40658.53086	28037.02369	3347.104755	33709.39095	30496.00832	80820.29876	48521.29443	31698.78285	13189.66194	59850.89529	24068.41149	52974.40197	21290.56612	10112.79832	17491.83298	53299.48402	44205.01008
PS(18:1/20:5)	0	0	2588.872862	2788.131499	5208.12013	1535.896904	1613.164604	7266.027589	4172.95904	1230.618606	0	0	4691.253017	0	2084.504203	1037.91053	0	0	0	0	0	0	0	0	0	2896.217583	5210.834452	0	2467.547197	0	0	8363.918103	2077.959773	3673.68112	0	0	0	2096.640845	1536.07563	2594.579815	0	1042.460308	2058.627548	1578.488858	0	0	0	0	1555.939696
PS(18:1/22:4)	5727.080483	4015.386172	9865.034942	5211.313991	5211.670735	8060.346961	4701.897928	12512.93455	5007.360288	22655.48598	29654.21389	7820.567591	3366.633953	5739.754027	4505.283272	6907.299321	8877.805591	0	0	0	0	0	0	0	0	8819.453358	0	0	0	0	0	1544.29282	0	2545.696828	0	4633.707167	0	0	0	1004.205214	0	10487.74299	0	2998.663127	1044.420543	0	0	0	0
PS(18:1/22:5)	3751.787689	1598.710508	5906.645027	3895.735712	1654.326157	1741.270905	3333.16618	3659.58169	9896.160068	15281.91687	13293.69096	2093.432138	3657.38391	6087.348653	3672.663016	7870.550411	4698.945217	0	0	0	0	0	0	0	1056.878015	12844.77495	7820.552319	1564.674658	1310.120706	3624.684696	1011.382179	2591.462626	3646.777339	1515.518964	0	1607.952359	5195.112469	7016.147544	2634.104145	1927.617811	0	4326.724646	3647.533135	5009.312108	1044.208723	1033.604465	900.1156179	3641.543131	3777.365726
PS(18:1/22:6)	8691.390588	13381.57583	29513.34534	8366.377568	16048.28849	11491.26798	12187.81547	22125.08432	8900.586618	11521.35509	5325.96965	8778.038677	8426.553164	3025.522127	12397.50306	14457.23939	4083.925852	0	1530.888041	0	0	0	942.2891176	0	1522.638598	12004.01068	12657.81162	3622.269103	4173.227285	7327.466921	3331.770344	14423.04879	6780.652148	2237.848681	1555.936801	4171.040879	2611.811209	10037.8884	9248.369338	3240.714812	0	2289.56948	2147.641998	8202.240751	2046.330938	0	1564.091023	1205.967027	4682.923303
PS(18:2/16:1)	26972.23685	21039.36693	32545.46579	9833.284305	10738.49169	26944.1015	18497.35512	33008.00937	15366.02072	43663.077	43245.93119	20443.51228	28570.67152	24059.10886	30058.25432	25215.57854	20313.77662	1840.750532	5899.468342	0	7263.491925	3221.092292	6579.81143	5537.377336	14987.08828	15775.46696	21227.83725	12929.46759	18122.1084	20873.78576	10817.81325	31092.53371	10482.74473	7509.078422	2021.192435	10329.14685	19597.39646	39951.7358	10108.17913	16932.81429	16332.15535	19145.18599	16087.34491	16973.74695	6661.213563	7483.627642	4297.95491	20442.53254	13169.31028
PS(18:2/18:2)	37030.56454	26184.17705	25470.44158	24588.957	27525.27078	38621.13546	26138.36422	19821.79376	26078.63497	31615.57526	31351.84155	38749.48018	59553.57254	20622.01498	21234.2757	26280.57435	32643.41632	1241.523728	2412.414216	2604.89556	5948.911748	5687.415385	9639.801218	8851.580302	11575.19822	23602.35918	34477.5938	16674.66227	47744.78124	65195.2567	20834.2888	42563.72755	22192.15893	20954.84814	3127.531583	12758.74886	46962.38454	13973.09243	16105.25027	31328.60491	19924.85379	16173.29916	30139.65411	33346.47714	15542.52235	6330.597763	9886.859728	22466.58598	29484.26866
PS(18:2/18:3)	0	0	1917.074866	0	0	0	0	0	0	0	826.4915963	0	0	0	0	0	0	0	0	0	0	0	0	0	0	625.9294737	0	0	0	0	0	1084.502831	0	0	0	0	0	0	0	0	0	0	0	0	0	0	0	1421.118329	0
PS(18:2/20:1)	0	0	0	0	553.9744974	0	0	0	869.3727214	0	0	0	0	0	0	0	0	0	0	0	0	0	567.4095908	0	0	0	0	0	0	0	0	0	0	0	0	0	0	0	0	586.4917988	0	0	0	0	0	0	0	0	743.4894209
PS(18:2/20:2)	588.0388412	588.0947951	0	0	1449.742099	0	0	467.3296534	0	0	1167.259347	0	0	0	0	690.6479821	0	0	0	0	0	0	0	0	0	0	0	0	0	0	0	0	0	0	0	0	0	0	0	0	0	591.6424778	0	0	590.0693461	0	0	0	0
PS(18:2/20:3)	1401.038214	2279.055709	7173.62042	4936.274957	4127.63867	5665.497687	5300.215048	1539.553933	9436.151104	17785.6053	4223.501434	7871.195866	2327.686662	1017.144879	12054.41696	8993.776335	8445.299821	2620.954677	490.3850783	0	496.0823714	500.6178139	3599.767935	506.4035628	929.1773924	9900.181898	12511.50969	2060.641744	13534.66604	14230.50157	1578.774079	5914.705661	2591.53543	4162.409253	1049.214756	2797.671707	4493.695032	17512.13752	3234.610135	4162.041797	4663.388977	4965.91786	4149.181548	8508.870038	1263.692896	0	1442.967441	3872.398401	3248.162145
PS(18:2/20:4)	34366.8203	33172.29859	120148.3961	35221.71759	34003.70128	87043.94424	23836.62364	57390.92093	44520.04814	153134.2467	82639.05398	51023.70469	68548.63568	35994.98055	46321.14584	103542.6286	35177.29452	4754.118645	6144.990148	4246.614445	7315.996448	2620.642419	10957.57432	4184.166545	21850.43814	86657.89324	106485.8589	30842.36031	86719.8702	130818.8525	24446.18947	75033.64289	74244.39093	55242.59802	3617.275712	48335.98025	41048.96725	156961.5773	38022.29854	38461.95716	14354.86981	87728.58794	15077.63984	68974.82517	30807.39917	23502.39846	20031.70793	110936.0166	57864.89564
PS(18:2/20:5)	0	0	1562.101221	2394.495932	1801.522563	0	1224.802805	1475.519649	1454.968326	3158.763327	4177.148765	1586.139167	2555.763625	0	4103.682203	3053.629259	2466.159442	0	0	1027.630001	0	1054.195549	0	0	0	1545.828634	3585.994834	0	2558.729424	3934.763379	0	6104.069544	1578.333483	3806.248273	0	1568.205668	796.8528855	0	0	0	2090.527777	2099.953574	2504.571692	2101.29211	0	0	0	0	918.8051734
PS(18:2/22:4)	4857.074651	1897.633344	4590.712189	2346.54114	7077.996208	4992.357746	2505.134612	2220.934215	2642.233783	6798.470209	7232.630039	6046.490788	3301.291784	4906.137975	3722.815014	6840.748655	3783.840673	0	0	0	0	0	0	0	0	4950.140093	7820.349017	3700.090654	3845.683543	8012.401593	2088.201566	2057.906442	5380.025302	1924.216235	0	6754.851786	2472.232669	4850.574869	4897.509558	1534.719578	2530.504617	2304.65974	1550.624787	1958.152851	2092.386986	1518.305022	1541.926955	3604.872815	2005.055579
PS(18:2/22:5)	1812.410192	1992.702088	10112.45243	7047.411075	721.8126115	2445.261902	717.2346359	6286.171197	1178.94856	4824.360412	4471.56143	4835.201343	4026.187124	4542.512587	5577.417533	2631.808841	9331.471013	1041.541744	0	0	0	0	0	1042.874903	1927.104395	7572.414261	3246.231716	2572.162739	3719.523611	9029.306332	2630.180729	7551.256926	3637.654177	5637.79369	0	4738.494634	1905.40248	5465.880747	10050.33597	2440.034066	1070.587987	3108.658135	2401.389708	5090.576038	0	0	0	0	0
PS(18:2/22:6)	3655.018883	10332.83417	11493.93271	8542.239699	10519.38916	6116.794508	5874.565132	8798.204447	4988.652384	2220.640062	3536.337814	5305.869589	10968.11545	3094.384408	7485.293445	4692.660336	8801.631985	392.6107732	1522.186618	0	962.197343	1020.230579	1883.91927	0	1455.279746	3245.391639	5879.879121	8206.70923	7908.25846	4312.550153	4598.534197	17292.4442	10663.45418	11172.11607	1028.063051	3765.846315	6311.030345	2180.16678	11990.05364	3900.621108	1979.276205	5003.745429	3909.755887	11583.48775	3334.099035	2335.696338	0	3357.173156	1499.760628
PS(20:0/16:1)	9752.146808	9389.800848	12107.61722	16284.80782	35106.51102	31355.98749	13224.76617	18057.62748	32031.4914	10614.69577	25370.91236	19012.32886	18415.49754	7949.441818	15953.79615	11020.29544	12822.43042	1968.59058	1770.131509	0	1181.825189	247.8915134	6762.636191	2665.221596	0	32410.5956	44858.50433	19507.26885	19368.62321	56024.87905	26008.80705	22985.73042	66392.70797	93068.06622	4081.078723	26770.37805	24659.13101	31117.3402	20613.30398	10751.17323	13609.04437	47959.88567	63494.22936	13423.02125	18394.20934	20337.09955	8530.895696	29498.70736	19898.64783
PS(20:0/18:1)	1756.754398	0	5179.640958	1481.348585	1741.374337	6992.818341	3818.217256	4943.20718	2969.627554	6885.029407	3525.805574	1288.624311	0	0	2076.401566	1989.472932	0	0	0	0	2648.095465	1021.968232	0	1039.452092	0	7220.291202	7662.160141	11631.17964	7262.997317	7001.029514	3321.656608	2742.803943	5004.186706	11125.82347	0	1525.847045	5948.636204	13196.84102	10643.54419	2322.923566	3966.095982	10831.636	9193.684478	1370.923836	3009.775107	2371.748116	0	2734.667589	4002.524919
PS(20:0/18:2)	690401.3134	382601.8756	431915.1484	449985.7841	477992.9633	744075.698	595178.488	789729.4563	634997.2405	354283.3202	609400.5179	643205.6613	724561.5127	624888.1758	624774.12	460828.1033	502388.2508	22973.48582	44349.50331	24896.4228	30106.92042	42876.76211	54305.70596	84427.24128	54395.42395	345638.7955	673591.4222	270317.1213	352875.8313	855452.6297	413630.4472	594823.9314	335681.6011	212841.8996	30831.03343	247292.6966	736256.0137	543481.9198	362133.9211	394709.4256	277878.4656	435441.9022	431618.0908	320856.6028	296725.9866	159067.7086	93650.49116	354850.1091	497532.2531
PS(20:0/18:3)	6484.157154	4607.199288	2903.444152	10052.75231	3847.790715	11355.64101	9450.294328	8600.386335	15897.79619	9411.38279	19019.56026	6637.580207	6262.564208	8071.657279	9545.594378	4031.736898	8504.386414	0	0	0	1753.309175	2350.49293	888.3199851	1468.301005	879.752758	6095.999384	27929.67054	4649.450683	4119.996416	27587.22487	8230.016459	12496.35408	9838.487419	11617.40719	585.5702093	4925.372475	8590.852212	7091.17228	3820.520369	12310.92891	3586.374108	10459.62917	8685.071132	7355.456046	4411.44198	4775.800742	2847.090961	6850.324141	10225.20998
PS(20:0/20:1)	829.5146973	577.4954698	3042.362397	1115.509776	1379.368195	3600.246591	1487.811902	2229.153213	6445.359725	0	1047.323546	0	2499.333485	1119.921779	552.9228566	1358.916438	0	0	0	0	0	0	0	0	0	0	2793.215294	3409.475323	1295.817483	1977.903493	3455.097273	2292.221505	3158.151291	1700.058257	911.6033622	3278.042901	3036.564686	3117.074751	2576.238448	588.2958036	1026.972642	1242.821112	0	2304.355255	583.4507513	0	0	4413.070927	1434.342303
PS(20:0/20:2)	7547.057645	8717.135696	10072.15255	12073.22844	6725.362743	12559.39174	9232.329361	9402.040923	14552.19991	7180.078891	8708.941976	12507.64288	8328.14764	10607.99078	5548.115366	5010.53655	4505.887547	862.8849373	586.4080688	0	611.7700677	0	857.0459106	1730.951925	581.9801075	8556.94973	11879.11554	5595.460482	4417.218788	20894.08475	5380.503994	11029.45232	8645.690505	7203.773511	1128.559612	13415.88845	8322.393332	12585.16358	6502.061043	10340.2473	6207.390105	9954.672052	13668.342	8788.757655	3181.448149	6490.654124	4308.680793	2577.06314	6937.274256
PS(20:0/20:3)	36005.30653	14140.971	26743.70433	23757.88185	30721.79844	53387.89468	34499.72723	35710.39977	59412.47065	39980.413	59720.59897	22355.79124	28437.59064	39105.55714	31631.83369	26168.38741	23487.57341	854.2804464	2174.954896	1439.911569	1628.156554	1713.991537	5201.086212	4631.836685	4055.708571	46539.05365	81873.9173	18263.69365	34657.40188	126140.8433	31458.35296	23123.09974	47612.78265	39927.45369	2260.575937	37452.65598	46101.88574	28160.41199	22033.15052	26282.00188	21881.94798	44032.16043	47066.3182	30292.99785	16846.3097	27361.77363	5321.398495	34784.0704	24836.19707
PS(20:0/20:4)	104490.4581	58294.5536	102691.2349	90914.87604	125694.0926	154558.0187	97715.95437	158596.1638	116084.3539	86376.55944	112826.3973	105524.3628	113664.428	97162.10231	122500.2102	96561.88796	108735.5342	6639.27021	9897.621805	6652.804499	5001.142382	10270.46108	12202.05715	12560.40069	9475.321841	96099.50627	135585.7657	90109.69416	89867.01629	214958.5216	85305.39195	129943.0299	130069.2949	156645.0475	4247.005844	107519.7551	95566.77093	115173.5035	193449.7237	109632.1583	47532.56874	116758.9195	94370.17438	64849.63333	62997.18388	44854.47297	34006.21779	106505.0751	80569.94663
PS(20:0/20:5)	1667.090793	0	3238.701075	0	0	4739.639024	0	437.1804892	584.639345	5336.30786	564.0296811	872.884119	0	0	0	576.7334973	0	0	838.9094551	0	0	0	0	0	0	4645.954864	11219.84314	1468.354852	5375.937504	11692.4665	0	17937.17902	5708.211658	11194.60022	0	5873.948685	3770.407437	1784.932732	10588.60366	0	850.1032673	2783.131667	10485.50245	3512.216931	2314.801324	584.9549343	875.0318321	0	1516.720244
PS(20:0/22:4)	4798.251028	2292.156745	3637.71008	4218.489847	3547.772518	7850.755587	5190.682808	7448.735684	7402.157719	6072.543403	11882.00598	6673.714952	2835.811801	5921.260031	4705.00883	2642.835348	3463.133122	0	0	0	0	549.7209003	561.283622	0	557.4536472	8183.549246	6000.241646	4418.016527	4656.570903	14188.4524	3345.578384	7122.083455	8959.345948	8157.764768	0	9442.9106	4285.65045	5951.865266	8008.759893	7303.731221	1970.330249	8922.547185	3845.317866	3762.679518	2618.453944	2023.327212	2578.189818	6795.873023	4468.19353
PS(20:0/22:5)	10043.24669	5786.886147	10452.51865	9320.850785	9810.575326	18417.55317	11602.08586	13942.66469	12890.04708	14402.74801	19036.81887	14739.91747	16070.81852	13257.57815	11144.92226	5348.790709	13818.34846	0	0	0	1595.95379	1676.926202	0	587.7380838	1374.679795	3104.789364	10580.67719	3503.221295	5348.002247	16596.6381	3942.877959	14282.80901	10389.56345	10396.14661	549.9774186	7709.913525	5656.586233	8059.885274	7220.980687	10263.82141	3579.152726	16871.64278	10242.4336	3348.947693	4778.770717	6652.650483	1624.760115	5353.210542	6201.221042
PS(20:0/22:6)	21568.82958	28568.22225	31148.17379	31331.85482	29962.0392	42166.05513	37243.99201	42226.44595	46247.6952	15025.83023	29821.58501	26775.59146	56659.35692	21000.27268	38971.05926	28945.03788	17046.15808	550.2013046	2997.527762	256.6522946	510.2973635	1610.070809	824.6674459	2367.353408	4401.787375	19041.06967	38606.11505	19594.13723	7771.758352	50844.0919	24305.18524	38479.48848	20908.70871	28439.93628	1108.230673	18941.75709	33386.46595	17438.52659	18521.18354	7314.476898	17003.39562	20696.00558	22107.87601	10110.0104	8952.265786	4787.142212	3371.919418	7818.215122	16075.98138
27 OH cholesterol	0	0	0	1935.967412	1935.949539	3868.766605	0	0	1935.949494	0	0	0	0	0	0	0	1935.9675	1.551784976	5.728389641	0	7.940757447	0	0	0	0	1.49562152	0	0	0	3.400550638	0	2.579839966	0	0	0	0	0	2.361091504	7.793919862	2.037768604	0	2.161250515	0	0	0	0	0	0	0
Cholesterol	6758968.911	4820736.968	11731702.33	9157678.183	7254387.249	6069165.014	9264804.484	8974215.57	4624134.679	4424533.194	4440864.424	7387034.296	10692188.96	4796243.506	4700179.485	4134965.628	12244020.05	9938.286736	9894.253411	9960.918926	9828.360164	9935.305242	9856.354753	9930.843905	9922.153197	9971.991698	9934.233569	9952.657534	9950.712415	9963.620181	9933.446768	9965.453059	9943.557444	9904.421552	9948.011908	9941.80352	9923.795182	9940.239171	9892.161373	9957.902554	9942.328956	9945.055414	9929.256187	9969.964223	9942.920261	9946.762059	9967.059077	9972.334303	9969.774311
MAG 16:0	0	0	0	0	0	0	0	0	2884.252947	0	0	0	0	0	0	0	0	0	3.820910072	0	0	0	0	0	0	0	0	1.920113343	0	0	0	0	0	0	0	0	0	0	0	4.072482083	0	0	0	0	0	0	3.019609574	0	0
MAG 16:1	0	2356.76571	0	0	5130.58335	0	6767.101295	0	3775.553644	0	0	0	2045.974977	0	1934.55829	0	0	0	0	0	8.871004352	0	8.033894963	4.053445518	8.475509446	0	21.06862129	6.11885937	3.535984464	2.484830884	9.864523576	0.450466065	10.11357163	2.1139247	8.049821434	0	4.468808931	7.375673761	17.2952221	1.998645635	3.12758942	3.594371966	16.30032889	0	4.484062606	0	0	0	0
MAG 18:0	5762.208696	0	0	0	0	4834.589771	0	4615.593798	2263.279885	1935.834274	3868.983443	3652.035559	0	4793.872274	1918.740661	0	4834.773618	4.115977773	5.685198111	3.192928119	35.51808288	9.839946464	5.373411793	0	0	1.279756157	3.948990793	10.53619303	4.266040112	1.827693979	5.717974978	8.767283184	2.479735505	6.593560682	7.788754841	3.620537296	9.205855395	3.506251586	6.163282052	0.696024873	7.656533342	0	14.08670704	5.087301009	8.100096201	5.213446414	0	0	0
MAG 18:1	5801.868987	1825.090166	0	0	0	3869.031694	3784.610698	2240.427811	6799.721733	14509.41005	1882.708444	0	6710.606044	7063.933816	0	7271.018051	0	31.74163119	18.25349827	4.938699553	18.00392474	11.13594895	27.14783513	10.67497779	16.66329645	2.987615849	7.425862052	3.142395158	5.627385004	10.70880679	20.86738549	1.989285417	14.41612877	29.92704168	5.224901542	6.454390776	9.083308362	6.017374204	15.34227114	6.937750199	5.592521101	7.646930113	2.542372525	0	14.28593833	8.801451738	8.70275629	5.093852299	6.288103003
MAG 18:2	0	1186.919237	0	1933.07592	0	4780.230873	2474.522648	4898.445508	2262.713576	0	7718.138129	0	4888.186511	1556.606055	2104.818394	2823.409574	0	0	0	2.050250801	0	3.069576746	29.16356591	0	2.979589863	4.366435346	4.381903868	4.249898593	3.267820883	1.474980549	5.013518336	2.223197482	0	7.599501363	9.149046334	2.504071339	13.63432217	5.283696167	17.11465569	3.12854752	6.835299842	3.419025161	5.086711789	0	0	0	5.341871431	0	7.189979809
MAG 20:0	1934.05807	3652.274592	4558.929845	3842.932931	7098.434453	5776.526678	3867.703065	8003.421501	4258.592681	1570.651753	0	0	0	2071.049168	1952.239191	5767.130575	6770.945264	4.814216739	6.036385871	2.093781846	6.100616354	0	12.47133145	6.978324205	3.507286083	3.797592347	15.1006856	2.051464112	2.796887974	0	1.263052179	1.717535482	0	0	3.233985337	3.579249253	0	1.996482833	3.11848233	4.072224647	9.400271713	4.06994375	3.052629191	3.71072675	0	6.605632353	2.320265555	0	0
MAG 20:1	2343.249713	4032.617896	2115.679776	0	1935.802721	3871.787292	0	4596.871981	1487.595885	0	6919.833413	1935.355145	2842.255091	2280.177756	2008.236976	3867.327869	1935.355167	0	0	4.101798949	7.742562501	0	0	0	0	0	3.919713833	0.755521489	4.367336116	2.290472854	2.931699928	5.075400957	2.929836628	11.02914669	1.15547279	4.387293055	3.563216604	2.273120152	0	0	3.402332824	5.401556723	3.053205858	2.752428577	5.9772015	2.90602237	0	2.10063052	0
MAG 20:2	1935.274492	0	1694.113117	4838.268034	3845.35455	3576.993933	5805.199243	2836.257496	0	0	2836.253244	0	1886.835218	2171.218849	1854.302993	7702.213737	3815.419069	0	10.48393334	4.099047286	0	2.530931798	13.25557806	5.340570562	2.777063655	1.495161929	0	0	2.380227638	1.527397945	2.327620668	4.12391	2.080555681	2.565541707	3.057131189	2.585674376	0	2.314327175	5.191878714	3.05168305	3.455437538	2.092625177	3.281127706	2.426329487	2.990857631	0	0	0	3.915007722
MAG 20:3	0	2972.602833	2664.413649	0	0	0	0	1934.05807	0	0	4792.828776	2882.49358	0	0	1487.516666	0	3625.934272	5.071481842	0	2.266229227	22.23786712	3.809022042	7.904898236	3.491159581	3.73970058	2.989010929	5.730464082	1.723975555	4.010564415	0	2.09049392	1.213822968	2.102868826	8.869066252	0	5.322387512	3.654305365	0.699052481	9.746715668	0	1.728941456	7.46769742	0	1.364174144	5.528071038	3.710819228	3.019543228	4.75197851	3.452152965
MAG 20:4	0	3398.843709	1935.950089	2900.45218	3541.688435	2590.8829	0	0	3613.578452	0	2902.252956	2899.537232	4040.610497	1887.626825	3626.210678	3045.023915	0	2.626472567	0	0	0	0	0	0	0	2.225876006	0	3.280481367	5.8514057	0	0	0	0	0	0	0	3.480100142	0	3.505077851	0	0	0	3.426285043	0	0	7.125949793	0	0	0
MAG 22:0	2517.701464	1933.024596	3064.329083	2902.300596	4339.631836	2902.564872	2559.090565	1935.949406	5524.095927	8704.329575	4833.122631	1839.955099	7603.634196	1935.855072	2696.966602	2104.431302	6147.108003	0	0	2.045807646	0	6.219391201	5.298560749	8.651928733	3.791911257	1.351457873	0	2.124954316	0	1.799666126	0	0.638138618	2.103741063	2.244631793	0	2.557222326	9.048189262	3.535121879	6.201484078	2.034713479	0	1.548817808	5.183619149	4.94983988	0	7.425153257	3.019735441	0	0
MAG 22:1	0	4841.83483	0	4816.443154	2902.497784	0	2865.888463	1968.987541	0	2359.733623	2810.897783	1868.915044	0	0	0	1874.868827	3323.738767	0	0	4.098867515	5.690706582	2.466497171	7.904898235	0	8.84680782	0	0	0.752387304	0	0	2.447741883	0	3.153737591	5.00189732	4.234082312	7.749125301	0	2.361091349	0	0	0	6.378066812	0	3.710661785	2.988701853	8.82723953	0	0	0
MAG 22:2	1934.62529	4854.563236	0	0	1935.886762	7738.504161	2558.883868	0	2616.34604	1749.211323	0	0	2254.701633	2865.715172	0	1749.020968	0	3.384228365	3.816269189	6.124592129	7.506651519	6.216632124	0	10.48194107	6.319270597	0	0	0	6.784886633	1.526590137	3.893870171	2.579990281	0	3.35145119	1.902487333	3.852043509	3.654338789	5.583852385	7.795462552	0.487465247	0	0	0	1.901831545	4.484024788	0	0	1.948891052	0
MAG 22:3	1935.965977	0	0	1935.966022	2079.612048	1641.136482	1001.393659	1556.487241	3309.208392	4836.763006	1887.544039	0	2168.437952	3564.274151	1887.626825	2340.044061	0	0	13.34448875	2.21583269	11.90538776	4.945633503	7.95126013	3.159261617	2.493524584	1.804845787	0	0.953505851	2.349839647	3.051683944	1.043198162	0	1.706581886	3.355925652	0	0	0	0	0	2.114329444	0	0	2.56926642	0	0	0	0	0	0
MAG 22:4	3831.262905	2899.843424	0	0	0	2902.499932	0	1487.489811	1935.9675	0	0	0	1387.571905	1479.165727	1887.507479	4488.976857	0	0	0	0	7.831760449	0	7.738822328	2.686691483	3.789690999	1.481928851	0	0.901876229	0	0.783565792	2.120639526	0	3.153695719	0.624558858	0	3.873254419	0	2.401656724	0	1.986479038	1.694782746	2.161269113	0	0	5.03209265	0	0	0	0
MAG 22:5	3645.525882	0	2653.182273	3959.442112	3782.800741	3560.255515	4891.033953	5778.06611	5183.184449	2475.783124	2854.881579	6138.601283	3491.644841	3866.746691	2875.622765	4552.146048	3492.419177	3.958132593	9.464953877	1.853238024	5.092833593	6.589919277	4.847909119	6.497302305	5.668676198	0	0	0	0	3.968274718	3.893053135	3.188070284	6.260437364	2.580174048	0	2.584856567	3.302038418	2.359636605	4.76743835	2.632994961	1.685871616	0	4.469061776	1.901071543	3.208692573	0	0	3.202313706	4.187527462
MAG 22:6	0	0	0	1749.333903	0	0	0	0	0	0	0	1932.958288	4275.096321	1935.834453	0	2883.109354	1934.638268	0	0	0	11.06210668	2.466403711	0	0	5.548148701	0	0	1.632887583	0	0	0	0	0	3.357830574	2.870214279	0	5.363578421	0.926540133	0	2.037770133	1.728928758	0	2.590345132	0	0	0	3.019609504	0	0
S-1-P	0	0	0	0	0	0	0	0	0	0	0	0	0	0	0	0	0	0	0	0	0	0	0	0	0	0	0	0	0	0	0	0	0	0	0	0	0	0	0	2.344738619	0	4.322301028	0	0	0	0.184862223	0	0.433083166	0
Sphingosine	1918.767249	0	0	0	0	0	0	2902.401574	0	0	0	4314.329622	4838.179983	0	0	1968.947218	0	4.449338418	29.11256237	0	16.13557424	5.404854624	6.553280764	7.140492227	3.246326527	2.732998911	4.190189172	7.197952597	4.049206838	1.535304343	3.078459589	0	5.941665117	6.364195873	5.322194714	9.126374707	7.746756285	10.76585989	3.802736437	2.463828906	11.36253398	4.680730407	5.102152579	2.231411816	0	2.437364585	4.497532212	10.1349478	5.192917588
[truncated: 7 more columns]
