# Supplementary material for: Plasma Lipidomics Profiling to Identify the Biomarkers of Diagnosis and Radiotherapy Response for Advanced Non-Small-Cell Lung Cancer Patients
Source: J Lipids. 2024 Jan 27;2024:6730504. doi: 10.1155/2024/6730504 (PMC10838201; doi:10.1155/2024/6730504)
Supplement: Supplementary Materials — The original data for all analyses in this manuscript are provided in the supplementary document, according to the corresponding subgroups. The corresponding subgroups can be obtained according to the supplementary file name. [file 6730504.f1.zip › Lipid (Control vs. lung cancer patients during radiotherapy).txt]

Sample	1	2	3	4	5	6	7	8	9	10	11	12	13	14	15	16	17	18	19	20	21	22	23	24	25	57	58	59	60	61	62	63	64	65	66	67	68	69	70	71	72	73	74	75	76	77	78	79	80
Group	Control	Control	Control	Control	Control	Control	Control	Control	Control	Control	Control	Control	Control	Control	Control	Control	Control	Control	Control	Control	Control	Control	Control	Control	Control	RT	RT	RT	RT	RT	RT	RT	RT	RT	RT	RT	RT	RT	RT	RT	RT	RT	RT	RT	RT	RT	RT	RT	RT
FFA(14:0)	26226.31883	80393.75253	0	9602.152861	28087.01512	15353.41957	180623.001	196940.5579	408325.3525	11160.65526	146976.3839	153794.8388	432185.5674	168788.1311	167446.9361	754414.846	535360.908	647650.5685	584684.5477	589587.1792	608639.3145	585732.8467	614848.3952	632612.4001	606199.8314	1082747.504	720446.8869	712231.457	368259.6151	1002084.272	1044978.365	768414.0541	287247.3255	690822.711	779289.6216	2237319.573	916594.2262	1024380.243	972907.5132	1199096.519	1442970.035	0	0	0	401530.1811	607953.9646	140941.7394	237225.7148	417209.754
FFA(14:1)	1350784.043	934898.0891	1446898.169	1028215.637	702446.9749	1411917.572	1120809.525	1143673.096	913902.0918	1654532.747	1271510.884	760046.8399	896820.369	819793.2245	1088553.384	1007090.566	634691.0304	1146818.172	563021.4893	614788.012	935532.4633	644556.0589	733623.3161	697558.553	421259.1064	490626.3793	510812.4985	1059209.772	1641163.344	693021.8818	743863.7966	593506.4224	602965.2047	1083257.743	391979.131	817034.1519	518811.0626	807609.9302	732032.1964	689805.0929	836103.3776	0	0	0	722436.7095	779079.4103	517775.8391	565921.4014	659062.5337
FFA(16:0)	3416688.562	6602063.872	4007995.141	3151821.419	7028577.537	2752007.512	5938757.847	3699754.116	10754797.84	3140045.988	5309540.935	9107977.696	10875851.05	6968026.556	3135026.935	6196127.279	4181207.331	9224731.477	3984811.166	5632357.372	2975541.217	2861268.271	4149388.998	7298027.377	3527109.234	11576427.14	14546107.79	14088662.41	4223536.485	5695313.541	13951499.08	5768575.349	6025320.563	15360406.26	7344914.832	15286300.91	4716593.841	9970040.649	6857759.267	5133584.953	21439232.55	0	0	0	10320786.57	11693797.39	4396242.42	7095100.274	8730636.524
FFA(16:1)	369966.7538	701699.1795	417272.3645	321422.9805	585186.4115	319475.7873	950290.8018	349711.6715	2091540.468	413828.6398	551564.8417	1614598.729	1627677.414	843856.7259	419767.4669	274021.6945	373878.4218	360829.6314	105860.4405	176934.0265	72282.53438	42173.49778	133777.6171	650050.225	59219.97547	631634.4604	1258667.552	809118.777	78665.07151	156438.375	896817.8893	194378.9288	1112883.333	1428027.142	1118862.728	3374316.781	104185.3684	588058.777	457261.564	1341066.801	3586309.276	0	0	0	1286822.049	1431793.679	356625.2909	1002754.6	1495249.553
FFA(16:2)	294974.8977	294659.2343	253632.4453	287294.8688	305714.1567	293591.4081	256653.9928	264923.5369	276358.9053	335896.8689	280467.3173	257474.4721	278288.2878	298954.2513	282172.674	258898.1168	158587.9074	305429.2183	343559.9258	257181.9982	322068.3561	322200.4198	320514.3311	328870.0714	309842.6189	298664.3286	314478.5398	722157.896	335491.303	368891.3567	728545.7234	215513.6218	368699.9288	453676.2325	363571.651	372204.7549	91799.10914	383170.8769	346356.4121	738219.101	282506.9515	0	0	0	420709.4681	198492.6899	272312.5508	324764.4335	209926.1974
FFA(18:0)	4601318.08	8212052.267	5802695.115	4475891.333	8816125.637	4087444.29	7390552.901	6506423.4	11936995.49	4232152.732	8438703.904	10421838.01	11224726.61	9696887.896	6602319.412	9632039.685	8104545.287	12003034.57	5512455.109	7404834.692	5059361.467	5857773.39	5461668.777	8196240.154	7480563.688	8254586.994	11847260.36	8442192.018	3804376.94	3928612.617	9277808.613	3507866.427	7862581.407	8169567.91	8043037.468	7267144.703	6142256.223	6347845.514	4098171.805	4936854.897	9553089.155	0	0	0	9574360.51	8864213.643	4511762.152	5451246.562	8000841.531
FFA(18:1)	11452711.7	33860047.15	20655290.42	13207490.09	31281531.85	9386931.312	37418414.25	18866572.22	63551291.38	11520421.48	29225300.7	49804379.23	55061067.43	35447667.94	7848356.096	24152109.34	15898990.45	19768057.42	5768952.534	11715509.28	8283740.93	6616725.164	7034023.136	14448154.13	5893788.499	20178494.02	44924411.67	31066696.84	6222336.794	9254260.946	21788848.71	8183063.045	18023214.18	22617078.91	26833176.84	34773361.07	6035769.168	21056966.31	18299100.17	4932361.003	50616234.38	0	0	0	27624294.25	28976306.83	13290732.97	21013787.73	23953509.28
FFA(18:2)	7331924.117	17331817.86	8099924.253	4968593.072	12644382.72	5015656.419	16807129.83	7494480.715	30014904.86	7725626.064	15356407.27	27700922.53	31441075.89	21534512.49	3615306.975	13843661.27	9098157.702	10200028.11	5076521.63	8231028.37	4599952.028	3590833.925	4106303.294	12918043.91	5002052.381	14796058.47	22456271.43	14862271.14	5936119.222	5974559.501	14027347.19	4424555.315	10380206.81	13007106.35	14875317.99	14044434.27	3807143.21	15870603.37	9166314.472	4187533.707	37566465.36	0	0	0	14970071.69	15260341.52	9172864.924	11016630.17	13837789.6
FFA(18:3)	200392.8598	784130.1162	218019.4049	305774.707	502085.0457	154401.0551	950175.9063	192657.7691	2025777.359	289726.9213	709714.6413	1443237.045	1643759.462	1127827.791	162918.8144	475593.5636	365229.1554	1293051.356	249396.8124	284609.4735	773028.45	599522.3203	210086.3529	478418.5702	264778.5555	1442723.325	778933.2948	614651.4144	270371.0557	591459.4863	749029.4955	360574.4588	649724.7274	743237.0914	1195175.083	640887.6842	195503.0942	1110006.27	371413.2135	231482.8049	1740667.321	0	0	0	690465.0856	889832.994	605512.2655	417750.8291	712869.8059
FFA(20:0)	2381732.042	1298149.415	2197977.646	1275730.793	3099860.405	1335567.871	812795.3855	1074665.973	1803200.9	828850.03	1519165.824	1543488.472	1071780.825	1556566.962	1152320.372	986808.5566	1178911.657	1960246.506	1363730.744	1014175.095	705962.2473	871458.9617	1631242.21	937682.309	1443681.757	1537331.079	1838814.476	1859435.807	1903807.441	2701339.34	1986775.745	1525318.455	1952611.083	2179033.835	1576768.696	757355.4221	2063791.205	2012312.855	2086835.199	2049749.673	1674059.378	0	0	0	1156282.514	2412748.985	1090484.558	1457251.808	1575853.096
FFA(20:1)	386712.8145	1712327.477	1167788.508	712965.034	1458480.115	428917.9668	1738898.01	947907.3464	6811843.59	592797.0293	1090544.854	1848327.334	2464894.974	1074224.84	597995.3821	1089580.223	614989.3223	720064.0676	103144.149	217979.3369	217249.0138	199888.0061	140460.2018	211800.469	114160.745	393034.1904	1530406.781	989443.7763	155812.5956	284169.7296	543262.1942	174613.6988	518086.9526	325115.5915	761321.5455	616247.5548	342654.1663	746440.302	301203.6884	338539.1826	1011684.657	0	0	0	442168.6945	512933.4396	225893.2275	378195.6737	447867.4552
FFA(20:2)	304859.8471	724787.981	495569.4976	375890.8381	859126.6041	255100.2691	840216.6306	465137.4805	1564329.864	463599.5465	902289.193	1230811.759	1370146.764	755148.8459	249996.3547	404046.5268	454852.3889	413761.9488	95129.12342	149644.3495	86372.62316	55523.47871	122052.7511	323349.8025	117089.2489	378320.9985	897852.4939	388867.2695	201440.1536	137949.8102	340496.8288	141108.8635	412940.7848	325059.1496	495584.9191	480899.7976	192334.2344	308250.4729	214032.3588	142491.2002	839875.6458	0	0	0	375211.4368	554065.7622	257671.682	328610.9607	429950.3425
FFA(20:3)	506903.7799	702937.1607	1054466.508	1181136.955	1582762.139	1041243.542	855990.0234	1299459.479	2212970.248	779324.9736	1609984.358	1594397.406	1741483.998	1320789.406	485213.2945	537836.5169	1129350.148	357064.8982	210121.1641	175037.2492	478920.7753	359383.5255	201757.2034	298662.2445	288044.0441	376313.6416	948297.9512	443128.3391	359412.7608	269179.7542	354014.1499	302834.2424	919758.6633	449942.9782	484789.2919	398951.1159	544200.9305	377092.4752	309743.402	382294.7449	812918.8196	0	0	0	368997.7064	643077.2266	335875.8676	346467.6704	456055.7081
FFA(20:4)	743147.8533	1111321.567	1151247.648	1353789.655	1820492.69	968303.2411	1808616.283	1784918.225	2724515.224	1426097.028	1842660.424	1857757.119	2367151.836	1608928.31	599944.2034	952002.0221	1547775.769	764989.8408	587333.2822	457944.7449	397791.2691	326742.4146	728346.4295	420640.1007	570932.3983	553282.052	1944766.679	482675.4311	353820.0488	383275.6219	428266.757	472701.4166	1309055.152	920199.3965	640975.3842	1415841.638	447515.6427	457546.3036	554665.5417	371989.3977	1072102.497	0	0	0	772898.1565	1304365.357	653087.445	904288.5859	1028332.51
FFA(20:5)	314716.5673	338984.0608	1987002.536	438492.447	428469.5574	3367276.878	477546.9167	281768.1375	483703.2393	335377.0528	1514338.515	514512.5372	392080.2754	626659.2475	378634.0839	663376.009	447404.1525	213088.7144	284132.7951	167093.8511	187289.1256	181941.6941	277999.2083	267626.3969	301023.5174	168635.9814	202874.8671	224787.6154	255159.2333	292598.5241	204024.4317	205828.5958	123487.0572	222343.2251	707180.8194	243695.4601	618560.3608	176922.6244	230645.5793	228231.6937	200961.8896	0	0	0	356284.3707	1490541.374	442228.8985	307421.7802	309298.068
FFA(22:4)	413644.4063	863880.5913	804008.7042	749518.9887	1397136.411	509371.6692	932336.4518	825482.8117	1809650.243	806583.7008	1094222.888	1267127.585	1170487.075	909876.0095	269545.7021	458610.1571	723504.9772	179105.2332	57084.67092	95492.75	48101.87136	31017.4815	86067.35101	162507.6397	61650.94457	195622.3655	982956.1799	277645.2871	128903.7932	115621.9129	217622.9479	71656.27965	697625.3639	324703.3737	441644.3162	507210.0363	144294.2828	203546.0596	203746.4256	84174.28282	640039.1248	0	0	0	194503.4541	379361.0194	181368.6135	331204.2954	330884.1502
FFA(22:5)	206562.9547	647120.3003	459595.7061	599616.7829	1117273.782	231476.9886	725098.7371	602919.8531	1697950.855	691566.1838	922808.0131	870013.8759	1502648.554	645741.9849	198997.1003	382684.2178	590533.0323	194299.9651	74359.36593	92655.03657	62339.92132	29489.45121	80711.17528	80152.41715	59743.44719	197902.6125	618582.8701	329765.2375	67141.86854	347987.2064	114723.3008	99524.71171	442792.3563	320368.7027	337138.3062	242754.8758	95470.53048	150639.286	200445.3344	112227.0469	702951.047	0	0	0	224123.273	365008.8961	198406.2502	191891.6532	222070.9167
FFA(22:6)	88888.48383	391686.0187	275810.6558	290404.9794	561186.774	139101.5052	313692.8751	305603.8329	690392.7365	236314.2918	247577.1288	288012.988	886066.555	274163.233	109536.2355	235933.0706	242046.4984	177808.8355	132966.0994	220314.4035	66462.27887	51409.22508	115078.2893	105416.9847	126583.7189	205449.3208	364422.8473	225031.0453	66776.56457	113777.8644	151898.6612	210232.6253	297622.1168	240126.2657	451455.0615	219965.2338	160804.0728	172117.3204	280037.2047	38053.13955	572666.9042	0	0	0	276448.8058	390751.5843	211479.6361	185166.7216	240975.4715
FFA(24:0)	16516325.13	33070915.39	35244747.2	32907011.42	37838147.48	16387406.88	33692025.29	38425556.47	30775161.71	25862392.28	25123953.16	37075735.97	34971184.5	15466427.55	22559432.53	19926882.99	44321954.8	9894201.142	24531099.61	30581455.32	15694300.11	29980655.06	6634796.05	27397259.62	24991372.06	1720215.122	27433622.02	14297119.76	5760320.956	15161598.6	3171204.462	1221581.498	6672369.37	24681968.24	1495451.356	15041708.52	2054134.107	4976757.57	2542596.066	1853644.033	961236.1954	0	0	0	4492667.521	17610646.81	21336831.99	18890364.19	4057251.891
FFA(24:1)	646715.2515	1279560.984	1042848.606	1016138.112	1396454.898	559428.6182	922717.6683	832845.5196	2469251.298	600724.8539	643728.0716	830355.2051	1116844.295	740921.68	609839.2926	836844.5149	499890.906	371813.0113	70874.38341	97033.56844	191654.6066	167151.9245	59262.99396	96720.59425	52431.48174	149397.1752	918706.3901	517415.2802	180022.3186	142441.3622	288714.0543	68422.64646	499345.3498	89927.5061	430858.3641	227888.7485	481913.1923	277297.4067	157376.8754	43415.72032	456247.571	0	0	0	146302.0006	169037.8408	143325.0394	177217.1865	259337.3935
LPA(14:0)	0	0	0	0	0	0	0	0	0	0	0	0	0	0	0	0	0	0	0	0	0	0	0	0	0	0	0	0	0	0	0	0	0	0	0	0	0	0	346.9782041	0	0	0	0	0	0	0	0	0	0
LPA(16:0)	1733.218118	858.7181005	1729.18827	953.0798267	645.9582802	1734.275139	1183.611152	1030.503111	0	0	1729.48321	1612.130681	0	1343.385258	880.0710148	1388.195881	767.322098	0	0	0	364.343592	0	621.6281967	630.6429219	0	1579.010458	1988.311496	1031.739063	2985.827047	1346.338677	968.0114525	923.7168015	3528.920224	1447.937836	1283.636357	1522.37118	0	2172.350568	1360.832798	3314.521194	2348.277289	952.5938309	648.1414484	0	0	1082.654529	0	0	0
LPA(16:1)	0	0	0	0	0	0	0	0	0	0	0	0	0	0	0	0	0	0	0	0	0	0	0	0	0	0	0	394.3789646	0	0	0	0	0	0	0	0	0	0	0	0	0	0	0	0	0	0	559.072755	0	0
LPA(18:0)	812.3409696	0	623.8557334	719.3392558	0	1327.67727	626.4828987	356.674953	901.7624815	0	0	895.9924304	0	988.5480965	0	721.9784471	879.3756169	514.5919884	0	0	0	0	0	0	0	850.5085724	0	0	0	0	0	608.7659333	0	0	0	0	0	513.9337174	1131.231715	416.7976039	1020.476524	696.7237589	0	910.3963031	451.0632522	723.4396691	0	0	447.4764213
LPA(18:1)	0	0	0	408.1053488	0	619.29	515.97	0	0	0	0	0	0	0	0	0	0	0	0	0	0	0	0	0	0	0	617.0934494	0	0	616.0930074	0	0	0	0	0	0	0	0	0	0	0	0	447.2266462	0	0	0	618.9754852	0	0
LPA(18:2)	567	0	0	0	0	0	0	0	0	380.8556645	0	0	0	0	0	0	0	0	0	0	0	0	0	595.6155	0	0	0	0	0	0	0	495.4890048	0	0	0	0	0	0	0	652.3550491	0	0	0	0	0	0	0	0	0
LPA(18:3)	0	0	0	0	0	0	0	0	415.7601132	0	0	0	0	0	0	0	0	0	0	0	0	0	0	0	0	0	0	0	0	0	0	0	313.5795	0	0	0	0	0	0	0	0	0	0	0	0	0	0	0	0
LPA(20:0)	0	0	0	0	0	413.1748091	0	0	0	0	0	0	0	0	0	0	0	0	0	0	0	0	0	0	0	0	0	0	0	0	0	0	423.0759644	0	0	0	0	0	0	0	0	0	0	0	0	0	0	0	0
LPA(20:1)	0	0	0	0	0	0	0	0	0	0	0	0	0	0	0	0	0	0	0	0	0	0	0	0	0	0	0	0	0	0	0	0	0	0	0	0	423.4278173	0	0	0	0	0	0	0	0	0	0	0	0
LPA(20:2)	0	0	0	0	0	0	0	0	0	0	0	0	0	488.0894793	0	0	0	0	314.2769507	0	0	0	0	0	0	0	0	0	0	0	0	0	0	0	317.3069394	0	0	0	0	0	0	0	0	0	0	0	0	0	0
LPA(20:3)	0	0	0	0	0	0	0	0	0	0	0	0	0	0	0	0	0	0	0	351.308	0	0	0	0	0	0	0	0	0	0	0	0	0	0	0	0	0	0	0	0	0	0	0	396.2952568	0	0	0	0	0
LPA(20:4)	0	0	0	0	1023.327861	0	0	0	0	0	0	0	509.8175241	0	0	0	0	0	616.4991398	0	0	0	0	0	0	0	0	0	0	0	0	0	0	0	519.4049803	0	0	618.9597266	0	0	0	0	0	0	706.2389714	0	0	0	0
LPA(20:5)	0	0	0	412.637243	417.69	0	0	0	0	0	0	0	0	0	0	0	0	0	0	0	0	0	0	0	313.6806319	0	0	0	0	0	0	0	0	0	0	0	0	317.3060502	0	0	0	0	0	0	0	0	0	0	0
LPG(14:0)	0	321.1884531	0	549.8913019	0	0	325.4622865	0	0	0	0	0	0	341.9435106	351.2320376	0	323.5985135	505.215876	0	0	0	0	0	0	0	0	0	350.1163948	0	580.9003817	0	0	498.7507418	344.6354927	355.6206353	0	0	0	0	0	0	457.0399099	247.6954051	799.3861266	627.8351913	0	0	455.9087752	0
LPG(16:0)	1357.430086	858.7807056	1941.123863	1663.109092	1537.666136	594.0047386	302.1326273	3563.245226	1205.251337	2642.728243	720.4364254	1063.780154	760.0294376	1975.206482	2941.883058	4337.974444	2230.935496	4636.037751	1038.519416	2783.750271	1060.089341	1351.625685	2095.543718	1556.860169	951.9114768	2227.408025	1465.267699	3753.008359	2760.215937	2736.574655	2554.088364	779.4692958	1620.121657	4390.541146	1313.004282	2053.744344	529.7353781	930.6513176	2637.831787	4394.446945	2733.491633	9252.879402	8689.164928	2674.755381	948.9613199	2038.946363	2486.582758	0	1166.678033
LPG(16:1)	441.5721843	364.7940199	233.6449049	269.5071187	304.3454077	312.7990103	423.3528774	0	709.7042427	635.6716582	624.4717438	816.1704993	737.1017269	643.9162882	1056.16694	189.3907085	330.2759043	320.7517827	209.6799452	549.25015	0	327.5318384	322.590514	602.5004106	314.6008494	510.1660868	278.9827209	522.9001798	777.6077127	655.9427023	223.3088863	333.7176591	437.3089941	337.4254128	0	354.9936146	327.7159298	779.8750698	445.0707016	403.2898083	0	1736.366038	626.4393529	0	245.2848364	330.8584307	476.0454887	336.8464628	332.8399235
LPG(18:0)	3118.475517	1886.176684	6530.686989	5249.55217	4257.27446	1362.616024	323.4619471	371.3396645	958.1134889	3292.931614	1581.873684	2150.38193	2613.967999	544.6491946	2462.4859	2020.192556	2988.463356	6062.314643	4413.811561	3853.249184	3226.367732	1622.135568	4133.311983	2924.305041	2092.593972	2604.537	4007.465731	3444.198505	3344.575833	6647.028357	4836.124271	4772.950582	2277.256793	4031.498449	5024.088111	3268.931795	3350.700924	4939.220906	5148.961212	3280.427263	4430.130568	8996.841928	3884.320325	2152.50056	3305.310515	3927.205774	4369.020767	1644.526524	2901.87839
LPG(18:1)	11460.33742	6490.128184	13644.21804	9404.787421	15653.77905	3894.947297	9763.086264	17750.26502	7788.550005	11882.52095	9027.762856	6578.263031	10799.64318	11299.85621	5487.236753	11433.81864	8267.133002	19302.72286	14995.12137	5241.52987	16721.38301	10083.04695	10130.3434	6145.459662	4676.816911	6952.691158	8681.142947	9919.883816	20542.87822	23936.25673	17400.05382	8794.628063	20237.97106	7212.725614	11103.50452	22578.09188	9175.968875	15377.6599	16557.27257	11177.5757	15611.71226	16629.68373	11307.13512	8279.789737	15838.19859	14985.40066	9078.233323	10782.14058	14553.99229
LPG(18:2)	11759.10636	5352.19416	4930.978083	5462.567286	6623.169436	2911.491461	2871.670974	8667.748414	5531.349945	8912.318905	3697.547404	8802.208762	6865.942221	7781.844805	10523.1942	2576.182408	9515.789806	8640.302626	7916.888052	7794.70758	3382.343445	8915.491282	5463.0119	6471.787003	6240.790376	4824.299377	9907.494788	2971.88358	11002.2408	11722.20872	7116.935652	5520.538307	9324.884881	9030.956711	9658.184611	5548.071332	4568.706938	8994.467376	9833.148197	7296.568584	5284.137188	5975.067147	11164.664	8162.61076	7380.292829	7632.166911	5925.386513	6414.532081	5935.563902
LPG(18:3)	0	467.2832736	0	843.8183232	0	0	804.8500961	0	0	0	1680.383527	0	571.3495468	472.8858671	1280.481138	0	0	0	732.8016452	318.4066461	1631.69767	0	221.9063338	0	352.0756983	882.3798948	625.9228322	0	1113.517999	491.5892917	369.7905604	0	241.3077208	802.6039916	1333.141077	214.4650216	229.0759875	611.2207208	0	685.0217208	514.0983587	1116.057156	488.5980143	412.6490287	1035.881486	440.4479425	301.5665874	398.4009844	0
LPG(20:0)	298.1627687	186.8857053	0	396.2612079	0	188.039967	416.2210233	652.5834027	0	252.1374823	0	571.0210716	223.5848371	336.6358883	0	318.6599815	0	261.9658938	268.0254395	527.8361713	526.2271262	0	259.2880103	186.6126071	583.9384338	462.5522072	285.1968197	0	257.0053427	171.9490707	0	412.7870541	374.6891909	463.1468341	287.2408992	310.9359195	0	0	571.8893316	604.448051	0	545.7795504	827.1647155	461.4058872	0	425.8920204	431.9393359	261.8585686	0
LPG(20:1)	0	0	0	0	1048.517017	0	1035.483467	0	0	1053.964073	1048.708759	0	0	1044.385341	1541.865541	0	0	0	0	0	0	0	0	0	0	912.3390586	0	0	0	0	0	0	0	0	1015.601185	0	0	0	0	799.267336	0	288.0116916	311.4220692	817.1109695	0	0	0	0	0
LPG(20:2)	632.8557808	0	932.4721032	938.767112	569.238739	0	0	251.9951826	452.9749911	930.9020174	400.8562946	0	321.3764687	770.4657077	1375.119431	0	631.1026876	666.5181494	638.5448657	317.4223041	1201.899515	1167.856217	0	373.961942	737.3833419	949.0672959	777.8100789	1126.887421	2204.009302	449.3693148	261.422232	273.155761	545.8543214	1397.723155	723.564997	567.6663821	1003.758142	884.057891	843.1827692	530.3375134	1028.23149	952.2267279	897.393397	769.886229	843.5616647	424.5511422	0	0	0
LPG(20:3)	0	0	1879.268516	532.8244529	0	0	0	0	0	0	0	629.7418584	0	1305.689866	0	0	514.6880419	338.9358723	384.5713855	440.355842	437.9957939	0	0	0	244.1315375	824.6746466	1119.774779	698.1411279	1234.503734	1050.453461	0	0	0	1004.511474	405.5549852	290.7132644	382.7799287	239.5181583	538.0850064	686.3834721	0	679.3907825	957.4267889	664.3475913	625.8530512	211.7022021	689.8532012	871.5954258	633.0142485
LPG(20:4)	0	370.9683887	373.7045553	0	829.6683303	740.3524454	0	662.9497953	550.8875019	382.18371	314.1943831	345.1168889	0	193.1387038	0	215.5063896	189.9813327	287.4425012	357.8285867	601.8896573	0	288.0678441	0	0	736.6099279	337.6625663	869.4059047	610.364353	1436.419767	0	503.4875886	563.5091296	2115.422537	0	0	391.6583418	247.8960445	597.2510724	774.7743183	838.5002901	551.5851696	0	978.1606728	441.7376611	565.9975949	0	0	0	414.9047024
LPG(20:5)	187.0356382	299.2349974	449.8615685	533.9204044	275.6445924	427.9128977	398.4123555	845.9992966	124.6306072	269.4338947	216.807131	278.5329621	592.3463939	1203.380583	599.6952888	417.197814	528.4904905	470.8086768	208.5814173	468.9788003	0	452.2998758	190.907813	313.7647236	425.0453604	400.1014318	309.3015701	266.03348	320.6086797	1131.644594	266.2923257	482.803532	0	686.4655908	393.0232524	257.4489761	1161.291219	396.6417856	619.2007705	417.4012511	271.1211234	989.4021201	570.5786956	779.8868971	298.2835662	444.5330977	230.3855135	381.3255772	363.5383564
LPG(22:4)	447.3316179	343.4598281	585.246727	291.4733691	293.4146376	989.7481739	304.9472343	310.0092807	290.9436949	527.8358738	1022.23229	843.414619	865.400215	124.4913487	280.6163528	277.4124832	470.0210459	525.3654596	329.7686287	218.7902391	0	213.0981065	436.9501656	333.4839938	563.5250841	259.944904	721.9117072	315.1756426	973.5211512	674.5234627	416.6975846	428.8220793	997.8253309	625.840755	512.5347246	371.8386611	556.0684894	0	636.3047436	649.4939287	506.416205	346.1313164	329.8531247	773.2186891	0	163.402894	270.5265085	449.4182876	791.0974762
LPG(22:5)	258.7574303	517.0238979	1230.609616	959.9852631	631.9571619	134.5833424	133.6761739	558.8154193	464.8964659	920.526418	597.7152394	859.0382005	567.5010311	571.0540226	942.3819324	448.4966287	304.1556649	384.4222142	532.2735407	0	533.598187	296.6034666	366.6000956	663.6543694	488.3718065	660.2809071	867.957163	1664.969647	536.0046293	0	716.2354326	658.1219008	739.0659786	674.6120003	612.1054859	335.3665681	799.74392	765.0599951	798.8432771	553.3158373	432.9089152	724.0477354	362.6593397	484.0145325	392.8228251	592.3142306	424.1963943	267.4195384	0
LPG(22:6)	288.6725817	242.7236793	266.9442295	495.2309749	300.9315963	293.8769064	131.9943839	163.4512154	132.8214068	302.721185	223.7996385	300.7461391	0	205.4301632	449.6208201	131.2352303	554.9154145	519.7076255	357.3517905	0	0	0	0	0	600.4259256	346.0955816	352.3121943	704.1225465	349.3091769	518.2815887	1046.309113	351.8032521	477.6103566	0	901.4574183	714.9242419	0	471.9652632	474.0265055	488.4715735	496.4183239	842.878387	0	595.3108233	450.7247414	0	390.1935988	275.2612939	378.4466965
LPI(14:0)	0	0	0	0	0	0	0	0	0	0	0	0	0	0	0	0	0	0	0	0	0	0	0	0	0	0	0	0	0	0	0	0	0	0	0	0	0	0	0	0	0	0	0	0	0	0	0	0	0
LPI(16:0)	0	0	0	0	0	0	0	0	0	0	0	0	0	0	0	0	0	0	0	0	0	0	0	0	0	665.3360729	0	0	0	0	0	0	0	0	0	0	0	0	0	0	497.2475869	1980.688254	562.756597	1775.645241	0	0	0	0	0
LPI(16:1)	0	0	0	0	0	0	0	0	0	0	0	0	0	0	0	0	0	0	0	0	0	0	0	0	0	0	0	0	315.5782473	0	0	0	0	0	0	0	0	0	0	0	0	0	0	0	0	0	0	0	0
LPI(18:0)	0	0	0	0	0	0	0	0	0	0	0	0	0	0	0	0	0	0	0	0	0	0	0	0	0	0	0	0	0	0	0	0	0	0	0	0	0	0	0	0	0	0	0	0	0	0	0	0	0
LPI(18:1)	0	0	0	0	0	0	0	0	0	0	0	0	0	0	0	0	0	0	0	0	0	0	0	337.4027039	0	0	0	0	415.0284636	0	0	0	0	0	0	0	0	0	0	0	0	0	0	0	0	0	0	0	0
LPI(18:2)	0	0	0	0	0	0	0	0	0	0	0	0	0	0	0	0	0	0	0	0	0	0	0	0	0	0	0	0	0	0	0	0	0	0	0	0	0	0	0	441.9290532	0	0	580.8714023	417.4027363	0	0	0	0	0
LPI(18:3)	0	0	0	0	0	0	0	0	0	0	0	0	0	0	0	0	0	0	0	0	0	0	0	0	0	0	0	0	0	0	0	0	0	0	0	0	0	0	0	0	0	0	0	0	408.8573965	0	0	0	0
LPI(20:0)	0	0	0	0	503.5846749	0	0	0	0	0	0	0	0	0	0	0	0	0	0	0	0	0	0	0	0	0	0	0	0	0	0	0	0	0	0	0	0	0	0	0	0	0	306.7712411	409.1047006	0	0	0	0	0
LPI(20:1)	0	0	0	0	0	0	0	0	0	0	0	0	0	0	0	0	0	0	0	0	0	0	0	0	0	0	0	0	0	0	0	0	0	0	0	0	0	0	0	0	0	0	0	0	0	0	0	0	0
LPI(20:2)	0	0	0	0	0	0	0	0	0	0	0	0	0	0	0	0	0	0	0	0	0	0	0	0	0	0	0	0	0	0	0	0	0	0	0	0	0	0	0	0	0	817.8084462	0	0	0	0	0	0	0
LPI(20:3)	0	0	0	0	0	0	497.7	0	0	0	0	0	0	0	0	0	0	0	0	0	0	0	0	0	0	0	0	0	0	0	0	0	0	0	0	0	0	0	0	0	0	309.8387688	0	614.7329352	0	0	0	0	0
LPI(20:4)	0	0	0	0	0	0	0	0	0	0	0	0	0	0	0	0	0	0	0	0	0	0	0	0	0	0	0	0	0	0	0	0	0	0	0	0	0	0	0	0	0	0	0	0	0	0	0	0	0
LPI(20:5)	0	0	0	0	0	0	0	0	0	0	0	0	0	0	0	0	0	0	0	0	0	0	0	0	0	0	0	0	0	0	482.3960283	0	0	0	0	0	0	0	0	0	682.4188126	0	0	0	0	0	0	0	0
LPI(22:4)	0	0	0	0	0	0	0	0	0	0	0	0	0	0	0	0	0	0	0	0	0	0	0	0	0	0	0	0	0	0	0	0	0	0	0	0	0	0	0	0	0	0	0	0	0	0	0	0	0
LPI(22:5)	0	0	0	0	0	0	0	0	0	0	0	0	0	0	0	0	0	0	0	0	0	0	0	0	0	0	0	0	0	0	0	0	0	0	0	0	0	0	0	0	0	0	0	307.6313923	0	0	0	0	0
LPI(22:6)	0	0	0	0	0	0	0	0	0	0	0	0	0	0	0	0	0	0	0	0	0	0	0	0	528.8457178	0	0	0	0	0	0	0	0	0	0	0	317.2188118	0	0	0	0	0	0	0	0	0	0	0	0
LPS(14:0)	0	0	0	0	0	0	0	0	0	0	0	0	0	0	0	0	0	378.4224696	0	0	0	0	0	0	0	0	0	0	0	0	0	0	0	0	0	0	0	470.3730907	0	0	0	907.7767036	500.0508348	0	0	0	0	0	0
LPS(16:0)	0	1085.149351	1385.048098	790.8477735	692.2915903	941.7808167	1227.539279	1647.739308	1286.592927	0	1186.708483	1143.103781	790.6391187	1483.176295	926.8538274	888.0580553	1368.974196	0	0	0	0	790.4069337	439.0562015	0	0	1386.020513	1733.815121	918.4469855	1752.46992	2552.195616	1795.483425	2265.295557	2079.930826	2188.300868	1881.332604	1653.531545	0	1278.680881	1668.496779	2475.849286	1297.969536	0	420.0121005	0	0	0	1060.461971	0	1065.581988
LPS(16:1)	0	0	0	0	0	0	0	0	0	0	0	0	0	0	0	0	0	0	0	0	0	0	0	0	0	0	0	0	0	0	0	0	0	0	0	0	0	0	0	0	0	0	0	0	0	0	0	0	0
LPS(18:0)	0	0	0	0	0	0	0	0	0	0	0	0	0	0	608.5318932	816.0596173	0	0	0	0	0	0	0	0	0	688.4925342	0	0	831.2231973	1032.024483	687.8529531	1352.022223	525.7138251	491.0063	630.7180301	0	0	935.1674644	0	1278.209277	0	0	680.7746975	0	0	0	929.8285212	0	0
LPS(18:1)	0	0	0	0	0	0	0	0	0	0	0	610.3666211	0	0	0	0	509.1430151	0	0	0	0	0	0	0	404.6343839	0	908.9340632	0	0	697.0806264	985.2509829	0	505.8167742	0	0	0	0	1044.927358	0	982.093394	0	568.8839508	0	382.7062018	0	0	814.2254784	0	0
LPS(18:2)	649.5257186	367.2683184	0	0	0	548.2253805	0	0	0	0	0	0	0	556.8201622	0	0	0	0	0	0	0	0	0	0	0	0	0	0	0	641.3788252	0	0	0	0	0	0	0	1282.088057	0	0	768.9460931	341.5402268	0	0	0	371.3582044	555.0777839	0	0
LPS(18:3)	0	0	0	0	0	0	0	0	0	0	0	0	0	0	0	0	0	0	0	0	0	0	0	0	0	0	0	0	0	0	0	0	0	0	0	0	0	0	0	0	0	0	0	0	0	0	0	0	0
LPS(20:0)	0	0	0	0	0	0	0	0	0	0	0	0	0	0	0	0	0	0	0	0	0	0	0	0	0	0	0	0	0	0	0	0	0	0	0	0	0	0	0	0	0	406.4765557	0	0	0	0	0	0	0
LPS(20:1)	0	0	0	0	0	0	0	0	0	0	0	0	0	0	0	0	0	0	0	0	0	0	0	0	0	0	0	0	0	0	0	0	0	0	0	0	0	0	0	0	0	0	0	0	0	0	410.5480855	0	0
LPS(20:2)	0	0	0	0	0	0	0	0	0	0	0	0	0	0	0	0	0	0	0	0	0	0	0	0	0	0	0	0	0	0	0	0	0	0	0	0	0	0	0	0	0	0	0	0	0	0	0	0	0
LPS(20:3)	0	0	0	0	0	0	0	0	0	0	0	0	0	0	0	0	0	0	0	0	0	0	0	0	0	0	0	0	0	0	0	0	0	0	0	0	0	0	0	0	0	0	0	0	0	0	0	0	0
LPS(20:4)	0	0	0	0	0	0	0	0	0	0	0	0	0	0	0	0	0	0	0	0	0	0	0	0	0	0	0	0	0	0	0	0	0	0	0	0	0	0	0	0	0	0	0	0	0	0	0	0	0
LPS(20:5)	0	0	0	0	0	0	0	0	0	0	0	0	0	0	0	0	0	0	0	0	0	0	0	0	0	0	0	0	0	0	0	0	0	0	0	0	0	0	0	0	0	0	0	0	0	0	0	0	0
LPS(22:4)	0	0	0	0	0	0	0	0	0	0	0	0	0	0	0	0	0	0	0	0	0	0	0	0	0	0	0	0	0	0	0	0	0	0	0	0	0	0	0	0	0	0	315.8449346	0	0	0	0	0	0
LPS(22:5)	0	0	0	0	0	0	0	0	0	0	0	0	0	0	0	0	0	0	0	0	0	0	0	311.724	0	0	0	0	0	0	0	0	0	0	0	0	0	0	0	0	0	0	0	0	0	0	0	0	0
LPS(22:6)	0	0	0	0	0	0	0	0	0	0	0	0	0	0	0	0	0	0	0	0	0	0	0	0	0	0	0	0	0	0	0	0	0	0	0	0	0	0	0	0	0	305.0405724	0	0	0	0	0	0	0
PA(14:0/14:0)	0	0	0	1026.04327	0	0	0	0	0	1046.927123	0	0	0	1010.00256	0	0	1004.459686	0	0	0	0	0	0	0	0	0	0	0	0	0	0	0	0	1034.726234	0	0	0	1044.906285	0	0	0	0	0	0	0	0	0	0	0
PA(14:0/18:1)	0	1497.485902	0	0	0	0	0	0	0	0	0	0	0	0	0	0	0	0	0	0	0	0	0	0	0	0	0	0	0	1388.645208	0	1174.596308	0	0	0	2031.779583	0	0	1000.749828	0	0	0	0	1575.503478	0	0	0	0	0
PA(14:0/18:2)	169.0989489	0	0	402.9016581	0	312.1500747	0	0	0	358.3264493	0	0	1184.871103	0	0	199.1237739	174.3860321	0	1027.945806	0	0	1528.792973	0	0	0	0	0	0	1371.638556	0	0	0	0	0	0	0	0	477.8272193	1083.897504	0	0	0	0	1058.364158	0	0	0	0	0
PA(14:0/18:3)	1047.566522	0	0	461.0547987	280.5886275	648.9445273	277.2045725	0	560.3682625	214.2259644	0	212.5587988	0	969.3956439	0	284.0822041	1046.622547	0	0	0	0	0	0	0	221.9645173	0	0	0	811.1268555	245.9259527	225.1929041	333.6101781	0	391.0951663	0	519.6451838	577.3906759	0	769.9908593	291.5449389	340.4359675	0	0	1057.087675	0	489.4135597	0	0	0
PA(14:0/20:1)	1562.580658	0	0	0	0	0	0	0	984.8783449	0	952.7487927	0	942.2134295	0	0	0	0	0	0	0	0	0	0	0	0	0	0	0	490.6931123	230.3467078	333.1473505	0	0	0	0	0	0	0	512.2384126	0	630.26193	0	0	0	0	0	0	0	0
PA(14:0/20:2)	959.3187956	0	0	1057.853	0	0	0	0	0	1006.607351	0	0	1580.240516	0	0	0	0	0	0	0	0	0	0	0	0	0	0	0	915.6609473	1051.554158	0	0	0	0	0	0	0	0	0	0	0	0	1046.328209	1085.453753	0	0	0	0	0
PA(14:0/20:3)	0	0	0	0	0	0	0	1002.489021	0	0	0	0	0	0	0	0	0	1570.583486	0	0	0	0	0	0	0	0	0	935.1082435	0	0	0	2070.348521	0	0	0	0	0	0	0	0	0	0	0	0	0	0	0	0	0
PA(14:0/20:4)	1571.586659	0	1544.36405	0	0	0	0	0	1047.348916	0	0	1047.991333	1054.020424	1013.743359	0	1022.329804	0	0	0	0	0	0	0	0	0	0	0	0	0	0	0	0	1036.189342	0	0	0	0	0	0	972.2731709	0	0	0	0	0	0	0	0	0
PA(14:0/20:5)	0	0	0	0	0	0	0	0	0	0	0	0	0	0	0	1024.576199	0	0	0	0	0	0	0	0	0	0	0	0	0	843.9442707	0	0	0	0	0	1568.200398	0	0	0	0	0	0	0	0	0	0	0	0	0
PA(14:0/22:4)	0	797.9509401	1045.473211	0	0	0	0	0	0	0	0	0	0	0	396.2522405	0	0	0	0	0	0	0	0	0	0	0	0	0	0	0	0	0	0	0	0	0	0	0	0	0	0	0	0	0	0	0	0	0	0
PA(14:0/22:5)	0	389.3168072	323.4995443	0	0	0	0	0	0	0	0	0	199.8165049	0	0	535.3463386	0	0	0	0	0	0	0	0	0	0	0	0	0	0	0	869.386473	0	1128.894657	370.5353004	0	0	0	243.1804413	0	0	1083.188831	0	0	0	0	949.4975042	0	0
PA(14:0/22:6)	0	0	0	0	0	0	0	0	1049.717649	0	0	0	0	0	0	0	0	0	0	0	0	0	0	0	0	0	727.2440269	707.2226464	1037.251558	0	0	0	0	0	0	0	0	0	0	0	1189.629734	0	1094.251692	0	0	0	0	0	0
PA(16:0/14:0)	0	0	0	0	0	0	0	0	0	0	0	0	0	0	0	0	0	0	0	0	0	0	0	0	0	0	0	0	0	0	0	0	0	0	0	0	0	0	0	1447.927169	987.6543145	1611.665105	1600.988464	0	0	0	0	0	0
PA(16:0/16:0)	0	0	1015.72358	0	0	0	905.3524786	1391.619917	2000.540388	1041.95942	1012.733788	0	0	0	2471.614932	0	1348.73525	0	0	0	0	0	1256.301277	0	1535.78368	0	0	2510.257127	0	0	0	0	1542.896675	967.3255314	0	0	0	0	1598.111055	0	2056.910337	0	2102.131502	2708.17818	0	0	0	0	0
PA(16:0/16:1)	2003.325083	0	0	0	995.7686688	0	0	1508.917646	0	0	0	1212.186175	0	0	0	0	0	0	0	0	0	0	0	0	0	0	0	1491.083072	0	0	0	0	0	0	0	0	0	0	0	0	0	0	0	0	0	0	0	1149.572258	1264.223478
PA(16:0/18:0)	0	0	0	0	0	1052.93374	0	0	0	1562.665841	0	0	0	902.339894	1503.273354	0	0	0	0	0	0	0	0	0	0	2505.2552	0	0	0	0	0	0	0	0	0	0	0	0	0	0	0	2629.045422	1365.7484	1565.437125	0	0	0	0	0
PA(16:0/18:1)	0	0	0	0	0	0	0	1786.310328	0	0	0	0	0	1737.281931	0	0	574.7526108	0	728.7299854	0	0	0	599.078829	0	0	0	5015.481713	0	0	854.8957736	655.5502061	1068.432302	6260.34664	0	0	0	1147.719962	0	0	0	5660.615481	1024.50223	3647.587097	2096.242035	2061.292853	1169.01842	0	0	1166.07756
PA(16:0/18:2)	0	2455.498693	995.4968408	0	988.0960852	1484.745843	1992.747427	0	0	0	0	0	0	0	1726.459938	0	0	0	0	1546.03938	459.2271713	0	485.6514205	1027.885637	0	1573.492116	0	1534.859451	0	0	1324.112263	0	1041.039275	0	1572.744417	0	1087.919329	1412.724357	1018.629848	0	0	1500.467947	0	1629.863959	1551.041993	0	0	0	0
PA(16:0/18:3)	0	1265.710915	0	0	0	0	1253.227895	0	0	0	0	0	0	0	0	0	0	0	0	0	0	0	0	0	0	0	0	0	0	0	0	0	0	0	0	0	1172.027547	0	0	0	988.5665436	0	0	0	0	0	0	0	0
PA(16:0/20:1)	0	0	0	0	0	0	0	0	0	0	0	0	0	0	0	0	0	0	0	0	0	0	0	0	0	0	0	0	0	0	0	1303.427995	0	0	0	0	0	0	0	0	0	0	0	0	0	0	0	0	0
PA(16:0/20:2)	0	0	0	0	0	0	0	1001.383371	0	0	0	0	0	0	0	1053.981989	0	1578.53485	0	0	0	0	0	0	0	1030.313871	0	0	969.5387359	0	0	0	0	0	0	0	0	0	0	0	0	0	0	0	0	0	0	0	0
PA(16:0/20:3)	1006.998514	0	0	0	0	0	0	1039.455613	0	0	0	0	0	0	0	0	0	0	0	0	0	0	0	0	0	0	1004.438843	0	0	0	0	0	1042.952979	0	0	0	0	0	0	868.927421	0	0	0	1075.214731	0	0	0	0	0
PA(16:0/20:4)	0	0	836.1957062	0	0	0	0	0	1046.622592	346.5021868	0	0	0	0	323.4637669	510.1389121	0	0	0	0	1046.479158	0	0	0	0	0	0	0	0	0	868.1827439	1568.936376	0	0	0	0	0	1051.730457	0	0	0	0	3132.190413	1065.647653	0	0	0	0	0
PA(16:0/20:5)	0	0	0	0	0	0	0	0	1585.984157	0	0	0	0	0	0	0	0	0	0	0	0	0	0	0	0	0	1567.453187	0	0	0	0	0	1044.847949	0	0	0	0	0	0	0	1047.143561	1068.961012	0	0	0	0	0	0	0
PA(16:0/22:4)	0	0	0	0	0	0	0	0	0	0	0	1041.95942	0	1047.557552	0	452.8632189	0	0	0	0	0	0	0	0	0	0	1054.408396	0	0	0	0	0	0	0	0	0	0	0	0	0	0	1094.331172	0	0	0	1058.52125	1039.581935	0	0
PA(16:0/22:5)	0	0	0	0	0	0	0	0	0	0	0	0	0	0	1048.550249	0	999.0656877	0	0	0	0	0	0	0	0	0	0	0	0	0	1566.364135	0	0	0	0	0	0	0	1053.52509	0	0	0	0	0	0	0	0	0	0
PA(16:0/22:6)	0	0	1048.157379	0	1042.074461	0	0	1034.347737	0	0	0	948.289323	0	0	1556.32546	0	0	0	0	0	0	0	0	0	0	0	0	0	0	0	0	0	1563.080206	0	1040.438401	0	0	0	0	1037.58566	0	0	0	0	0	0	0	0	0
PA(18:0/14:0)	0	0	0	0	0	0	0	0	1582.92781	1056.306411	0	0	0	0	0	0	0	0	0	0	0	0	0	0	0	0	0	0	0	0	0	1020.21817	0	0	0	0	0	1053.443701	0	0	0	0	0	0	0	0	0	0	0
PA(18:0/16:1)	2994.661436	0	5499.666444	0	1999.232475	1494.791867	2997.879914	3492.459746	996.6866343	996.9998463	2506.806633	489.9776581	1967.534384	1500.483723	2504.968661	3494.847161	1858.662242	0	0	978.2941455	2027.392979	1011.850591	0	0	2017.330398	1540.923358	2578.627714	3059.807143	1893.335526	5269.869813	2561.526312	4847.946885	4784.758903	8193.669733	3016.022682	4112.189176	6547.637043	1520.261746	4552.396101	3949.393576	1840.557215	4695.295566	1047.334268	2097.203292	0	0	0	3435.153125	2492.78982
PA(18:0/18:0)	1509.766517	1007.111362	9909.572891	1515.908966	1944.536484	1505.347353	1514.218418	0	3035.341583	4401.593608	988.0303993	0	2356.244995	1996.275093	1411.574837	4054.530227	0	0	462.6577873	1513.480146	0	0	1514.117888	976.2872355	1008.166006	2055.7673	3295.835432	3605.005843	4508.043109	1511.08743	2123.867038	4627.979182	3811.246828	1513.637304	4072.619237	1543.940778	2025.178034	3806.658067	2020.903138	4640.456416	0	3125.092865	1007.987274	490.7524673	2465.006117	0	0	3491.506868	2000.24584
PA(18:0/18:1)	64208.60098	56100.46308	197322.1739	72358.33321	53902.56707	82386.69474	74400.22801	115814.5429	80215.6815	147763.3997	98177.85149	69622.94469	120973.6399	45935.28783	64850.98563	117950.7466	89124.779	13420.54639	17826.52292	14157.51105	25233.48056	18658.1651	21407.13776	10695.64863	43899.52952	48843.63835	101499.3156	104376.2575	163997.6473	100705.6923	132333.168	247245.3365	177230.4623	87675.91015	118678.1172	70509.49798	85787.53294	109022.6944	66872.65157	159875.543	85025.5219	122057.6159	162252.9846	80950.25439	62551.64444	37408.887	38307.22805	61052.81775	69485.1712
PA(18:0/18:2)	232487.6869	191778.9396	270604.5842	219038.7818	201880.0988	226241.304	180751.1519	267307.7603	131146.4993	180273.4336	142516.8145	244851.0299	264437.3993	165879.9335	226513.1267	162330.7501	188432.4438	30331.12066	59219.3593	66712.79478	53937.80655	51463.98142	86920.69084	52039.21567	146950.4146	162764.2432	167042.6052	140689.0223	375177.471	147452.8616	191715.2316	488962.2585	454834.9815	168603.2187	354000.7106	34543.53282	198995.824	309374.3513	102400.9343	446328.9174	146153.6806	252702.7276	474200.0008	173384.5336	159339.3159	66017.23738	95420.65261	47652.79069	80888.8748
PA(18:0/18:3)	4245.408401	1996.48741	5416.065438	5994.262542	2033.199567	4541.337353	1501.971625	2025.93539	1519.906987	5514.795188	2650.191065	2012.158746	8454.26857	4012.035836	2540.667234	2020.381923	0	0	0	2023.759206	2017.79815	3032.091455	0	0	3031.231911	1838.561609	4299.078547	2212.927346	6577.863716	2526.526477	3603.34706	5873.997785	5046.916541	2538.855375	1012.20718	0	1008.948964	2632.793372	1008.763642	7353.080184	0	5793.363179	2796.947084	4198.376396	2998.547103	0	4291.014423	1992.998751	1994.01986
PA(18:0/20:0)	2062.188864	0	2839.261225	4105.547027	0	1537.479299	0	0	2540.396822	0	3457.850854	0	0	2048.738682	2060.657837	0	1504.024492	503.5162797	477.5924511	2047.999395	495.7282783	407.3617572	1424.46055	0	0	1408.353174	0	2581.312698	3046.879703	7425.180941	3102.913513	3881.502909	0	3027.464675	0	0	0	2360.235592	1529.21461	2878.51377	2068.65942	3946.927688	8055.016443	1950.984275	0	1015.304531	0	0	1042.113971
PA(18:0/20:1)	0	1516.542607	1525.042439	1550.415589	4027.486375	0	2293.287753	2547.405298	6086.600911	1059.459711	2066.961664	2561.312182	7664.512252	2567.192785	4076.679941	3076.935095	1530.175708	0	0	2038.790623	0	1009.259929	0	0	1009.854723	0	6115.563421	1768.201354	5082.701387	0	4124.230158	4386.367337	5105.658177	924.1575404	2548.100549	2575.590228	6736.318943	2309.767051	1523.132579	8248.342771	4141.926308	3136.392727	5750.941552	5750.570022	4517.071322	2008.525425	2504.746657	0	1008.370921
PA(18:0/20:2)	1530.876245	2890.964043	3969.192001	2560.004586	1584.634099	3403.691965	999.2678623	2819.645241	3039.073708	3078.361142	2545.777929	0	3043.019348	2043.347396	1312.122265	933.8168906	2563.103857	0	1016.410812	440.3282865	480.8469499	1035.364594	502.898822	0	1012.205657	1549.453721	6111.115249	1934.112895	1476.75217	1976.333285	2552.621742	6580.445713	14789.40599	3983.517005	7208.464143	0	1436.655661	1321.031184	2033.486382	5492.931798	4652.495575	1444.010697	4312.218783	2611.063536	1495.095728	995.1683725	1006.028431	2557.94175	2505.764265
PA(18:0/20:3)	44231.12583	28934.5263	124319.2349	47952.81959	45323.31849	53418.25739	36626.7341	66192.2861	44911.85764	74527.8663	51337.24983	41508.06361	64209.63396	36727.82611	49858.54339	77446.8231	38801.4897	9405.145978	9747.889155	10596.56824	8181.868346	3433.516009	21679.51363	7681.442363	39121.12556	31568.25788	89810.16787	57503.40315	92583.41953	35128.07708	73465.22424	129656.5746	137138.5927	68653.27642	83808.93797	11951.65044	50310.99482	48940.39527	38136.8043	95788.60786	40780.93036	118619.6255	81950.0335	38617.46826	42954.05453	27204.73289	20400.93189	25527.16573	24147.38543
PA(18:0/20:4)	419184.9802	425948.6952	1541238.417	532638.2097	731892.3465	965298.5921	423801.134	1140883.394	496241.7194	1341185.866	892112.1637	528477.6132	733253.8209	375072.2908	610659.8901	1163322.625	510440.6015	95949.88612	92253.05682	93990.90944	68134.79043	57995.78771	146718.6667	78382.91657	262198.143	258681.9966	728155.4345	607696.3952	915418.7654	412743.3613	740071.6524	1458900.082	1194936.803	861050.5763	593667.3306	440073.9407	525774.7513	636092.4809	479528.6838	1007453.411	281409.5273	810759.5842	757005.1542	409704.5722	522879.432	267814.7936	275281.7425	373353.3595	433539.6432
PA(18:0/20:5)	1554.585896	2592.038282	17640.15805	9303.688123	30168.84057	14546.65831	16431.77706	32630.25855	8038.414395	19712.06334	8300.269207	9325.684124	24330.00223	3040.544768	18686.67904	19190.41391	6755.238081	1553.153286	2982.740578	1559.164295	2593.058875	1032.1597	3091.561082	0	9272.868365	8810.905135	21875.21288	11941.82896	11889.21341	6708.499908	10379.67631	21689.87603	36439.93576	26451.42339	23431.5943	0	18227.07266	5732.172873	12409.47503	5046.493874	9345.254958	22721.22959	6251.146579	6489.582122	8213.472118	5146.18366	2053.613423	1013.548519	2570.067858
PA(18:0/22:4)	87470.79585	51957.82156	283104.5671	73090.33034	124816.1267	244228.1222	80642.96223	167662.6405	96261.65182	539084.3142	371572.8805	128078.0753	149267.0851	118253.655	91029.39315	253044.3567	142211.2945	19220.74788	11012.07066	7282.046413	18668.49762	12995.10122	26977.78623	23884.30368	38431.56936	55572.83364	171359.749	238234.0372	290348.5859	117102.9843	220913.8991	304803.9589	271333.957	98852.13398	117742.5869	238934.5818	58628.19073	148432.6331	91577.78382	292666.0231	72803.21685	124036.2412	221693.2129	128395.9692	117412.1263	66486.42917	56245.7516	136111.7432	174579.3912
PA(18:0/22:5)	67224.79968	40443.52345	169661.5701	66875.2113	98191.48895	106404.2042	58641.59519	146344.845	73509.47379	207177.6358	179413.0081	86265.73843	101774.1927	59829.2471	74385.69728	143712.3679	84676.85901	13545.22773	14359.8503	10391.66539	19172.30928	21241.73098	17100.13452	9330.470029	28522.77081	51815.10998	122144.7532	75462.48091	181389.2585	73739.42623	100810.6008	179403.8105	186766.5766	142277.579	108707.3407	53226.55595	74492.01202	102073.8395	61768.39571	185923.2596	66560.64509	150391.9135	159155.0633	67774.79986	73970.80078	46022.05858	32932.68267	50607.27126	68367.21634
PA(18:0/22:6)	68860.84013	65110.45316	146449.9319	56821.92146	109934.0166	91716.65917	70746.78487	130809.8072	54300.03698	47662.06336	57915.03641	53438.30827	101381.2027	45238.92282	82551.68324	85165.78135	49568.3035	5627.119864	9376.788021	9896.871001	5206.485437	14580.17924	7981.72742	7167.148786	29511.31934	20791.81806	68907.0487	57545.57462	68294.81118	41701.84865	60850.14697	100396.3853	69133.45387	81758.55212	77174.33153	28602.06878	38199.35087	68971.93987	54371.78325	36321.84745	51428.85842	80468.2124	47572.95179	27182.35328	50855.60991	45880.0457	33200.30987	16641.95668	24503.98262
PA(18:1/16:1)	0	0	0	0	1056.19137	0	0	1026.557516	0	1501.116121	0	0	0	0	2335.180751	0	0	0	0	0	0	0	0	0	0	0	0	0	0	0	1030.132308	1099.086776	1115.269809	0	0	1048.218856	0	0	0	0	0	1128.755076	0	0	0	0	0	0	0
PA(18:1/18:1)	0	0	4054.946481	0	2015.850601	0	0	0	1013.626818	775.1507137	0	0	3401.641804	997.0626068	0	0	0	0	0	0	0	0	1008.319795	0	1009.275098	1544.544996	2028.142243	1006.295803	1745.100746	0	3585.988215	4887.495111	0	0	1690.851946	0	1020.152768	3905.611421	1515.268062	0	1523.936769	0	1462.867596	1873.625512	0	0	0	0	0
PA(18:1/18:2)	1007.014281	2003.863381	2517.973649	2002.747167	2502.528141	0	2367.745167	2498.849474	1937.539397	4009.49439	0	0	3521.525267	0	2000.468282	2495.059161	0	0	3063.633025	0	489.9938952	0	427.991312	496.4000667	1514.621799	1068.689215	3533.255087	0	3518.107303	0	3081.746661	7077.999276	7089.327762	3083.372049	2540.363605	0	2534.462595	912.6355088	3530.317116	2921.601687	0	1567.410385	3157.293468	2591.918606	1495.481379	0	994.9747562	1042.038617	0
PA(18:1/18:3)	1573.962054	0	0	881.2214069	0	0	218.5990752	0	0	0	0	0	0	0	0	0	0	0	0	0	0	0	0	0	459.3433188	0	0	0	1005.919391	0	0	0	1519.620957	0	0	0	0	0	0	0	439.9590259	0	0	0	403.4327465	0	0	0	0
PA(18:1/20:1)	1523.846713	0	0	0	0	0	0	0	0	0	0	0	0	0	0	0	0	0	0	0	0	0	0	0	0	0	1520.069195	0	0	0	0	0	0	0	0	0	0	0	0	0	0	0	0	0	0	0	1045.26102	0	0
PA(18:1/20:2)	0	0	0	0	0	0	0	0	0	0	0	1052.074566	0	0	0	0	0	0	0	0	1053.914887	0	0	0	0	1049.248174	0	0	1042.790782	0	0	0	0	0	0	1036.294848	1049.993722	0	0	1049.428993	0	0	0	0	0	0	0	0	0
PA(18:1/20:3)	1044.299775	0	1552.243597	1044.849261	0	0	0	0	0	0	1551.936551	0	0	1498.458278	1532.98731	0	0	0	0	0	0	0	0	0	0	1552.402507	0	0	0	0	0	3419.760472	1540.31267	1028.673871	2069.5681	0	0	0	0	0	0	0	1084.269158	2080.652636	1008.076679	0	0	0	0
PA(18:1/20:4)	1034.347714	2082.787659	10368.23583	4886.102688	3919.332513	2587.093676	6098.281318	10863.41715	6754.570127	5445.63615	4674.560861	4301.206252	3622.444886	1002.381854	7795.003276	15047.36485	3124.433909	0	0	479.2988075	469.7153572	484.1004232	489.3244455	0	2069.406737	0	3119.204029	2581.624379	6346.427048	0	2074.436954	11917.89637	8376.808669	17645.44428	6256.921768	0	2077.915336	0	4647.92998	3106.375916	3110.524413	5744.306443	6253.395409	2080.294745	3612.861034	0	3148.743188	1544.393231	0
PA(18:1/20:5)	0	0	0	1037.934557	0	0	0	0	0	0	0	0	0	0	1619.663009	0	0	0	0	0	0	0	0	0	0	0	0	0	0	0	0	1559.272312	0	1047.535949	0	0	0	1010.337513	0	0	0	0	1064.61877	0	0	0	0	1045.259273	0
PA(18:1/22:4)	0	0	501.1173465	0	0	1041.95942	518.993378	1034.347737	1550.138575	2646.400162	1025.486909	1011.264669	993.3697065	1562.430742	0	1564.653	472.209622	0	0	0	0	0	0	0	0	0	0	0	0	951.8995695	1559.340174	0	0	1450.377707	1559.047807	0	948.7189997	0	1557.604747	1023.980603	0	0	1043.260842	1083.417161	1549.196616	0	0	0	0
PA(18:1/22:5)	0	0	1041.692484	2024.351951	0	1012.038238	1037.93608	0	0	0	0	0	0	1026.539554	1537.884436	1033.672761	0	0	0	0	0	0	0	0	0	1038.314246	1037.76959	0	0	0	1516.358967	1013.982162	1556.702857	934.4216314	2598.647901	0	0	0	0	2587.904485	1037.46904	0	0	1042.017343	0	0	1037.946427	0	0
PA(18:1/22:6)	0	0	3628.923444	0	0	0	4173.219583	0	2601.402779	999.2693404	0	0	3120.473739	0	1559.95938	0	1044.161341	0	1580.088484	0	0	0	0	0	0	0	1042.970986	0	0	0	0	1547.615204	0	0	0	0	1564.020956	1043.404545	0	0	2592.894865	1023.965746	1048.062664	1565.508981	0	0	0	0	0
PA(18:2/16:1)	1055.697853	0	484.9000483	0	361.4508768	0	0	0	0	0	0	0	0	0	0	615.288257	0	0	0	0	0	0	0	0	0	612.2765394	0	784.0716369	0	454.4788383	361.1697605	0	0	0	0	0	0	0	0	0	0	0	0	1065.630132	0	0	726.9087781	0	0
PA(18:2/18:2)	0	1048.136372	996.597807	1053.983509	0	0	997.1941525	0	1058.50639	999.2693404	0	1003.400479	0	0	0	0	0	0	0	0	0	0	0	0	0	1048.806577	1513.516058	0	0	1014.048396	2049.456138	0	0	0	1513.305803	0	0	0	0	3088.793118	0	1136.889008	1001.823756	0	0	0	0	0	0
PA(18:2/18:3)	1044.14338	1046.37262	0	0	0	0	0	0	0	0	2095.918461	0	0	0	0	0	0	0	0	0	1037.336268	1569.664764	0	0	0	0	0	1558.858931	0	0	0	0	0	0	1046.966442	0	1053.913409	0	0	0	0	0	0	0	0	0	0	0	0
PA(18:2/20:1)	0	0	0	0	0	0	0	0	0	1015.741496	0	1905.384475	0	0	1195.901422	0	0	0	0	0	0	0	0	0	0	0	1252.788414	1003.397111	0	0	956.3939749	0	0	0	0	0	0	0	1236.221686	0	0	2615.838796	0	0	0	0	0	0	0
PA(18:2/20:2)	0	0	0	0	0	0	0	0	0	0	0	0	1185.880157	0	0	1222.901863	0	0	0	0	0	1175.6001	0	0	0	0	0	0	0	0	0	0	0	1500.832476	0	0	0	0	0	0	0	1624.722234	1584.715272	0	0	0	0	0	0
PA(18:2/20:3)	0	0	0	0	0	0	0	0	0	0	0	0	0	0	1495.64344	0	0	1056.006024	0	0	0	0	0	0	0	0	1019.019139	0	0	0	0	0	0	0	0	0	0	0	0	0	0	1549.822921	0	0	0	0	0	0	0
PA(18:2/20:4)	1556.296316	3095.965905	2057.896075	0	0	1547.93107	0	2066.27161	0	1548.515006	0	0	1542.636424	0	0	0	0	0	1020.342245	0	0	0	0	0	1020.243475	0	2078.619014	2591.172679	940.4159094	0	0	1558.628084	1021.091598	0	0	1036.294848	0	0	0	1034.839798	0	1041.445066	1044.625298	515.7863855	0	0	0	1006.02725	0
PA(18:2/20:5)	0	0	0	0	0	0	0	0	0	0	1013.055003	0	0	1053.789203	0	0	0	0	0	0	0	0	0	0	0	0	0	0	0	1053.340134	935.7051355	0	0	1048.470766	0	0	0	0	0	0	0	0	1392.705738	0	1033.538042	0	0	0	0
PA(18:2/22:4)	0	0	0	0	0	0	1026.636735	0	0	0	0	0	0	0	0	0	0	0	0	0	0	0	0	0	0	0	0	0	0	0	1030.284053	0	0	0	0	0	0	0	0	0	0	1565.375655	0	0	0	0	0	1512.041728	0
PA(18:2/22:5)	0	0	0	0	0	0	0	0	0	0	1041.957717	0	0	0	0	0	0	0	0	0	0	0	0	0	0	0	0	0	0	0	0	0	0	0	1015.558068	0	1002.229845	0	1083.440082	0	1525.395008	1565.262366	1004.357859	0	0	0	0	1027.488604	0
PA(18:2/22:6)	0	0	1037.970379	0	0	0	0	0	0	0	0	0	0	0	0	1645.412169	0	0	0	0	0	0	0	0	0	0	0	0	1027.529035	0	0	0	1043.683456	979.2803987	0	0	0	0	0	0	0	0	0	0	0	0	0	0	0
PA(20:0/16:1)	2041.430984	483.8306388	9381.747165	494.2313711	7617.500897	5053.876442	3070.067005	6120.987496	4553.060732	8602.221371	9347.263086	6080.784585	8452.211267	4051.609172	1436.321374	11682.61594	1903.824558	488.6824594	0	0	376.5916134	977.8160007	1533.405646	490.5087725	3554.227181	2026.710592	11162.89343	8768.430287	8793.799603	4371.33802	7146.083757	16007.98196	9794.448962	7356.340748	7332.471956	12708.29393	3595.671987	8105.571402	0	12361.57497	2579.087184	11069.90958	3605.974333	2613.337737	2947.230922	0	2006.039308	6987.38713	5330.262184
PA(20:0/18:1)	71038.47178	52207.05134	153256.6857	74689.05473	117576.9694	67454.92829	81932.58743	116412.2708	78289.26801	103038.0293	61653.34753	71634.48526	80393.16279	52654.02846	58879.54035	82192.24498	62826.30463	18906.59378	8551.111982	18848.52665	15927.80628	22062.16485	26567.60215	8501.835175	47221.09237	44950.79824	86827.85115	113790.1729	152704.9165	60428.52156	123510.4102	163135.4226	173580.2444	124951.3334	109488.0521	56731.68018	74171.71396	134150.0226	42077.26178	146138.2647	47241.56693	123293.1095	154083.657	68652.58125	57419.17588	29049.05946	21538.14558	39397.91625	47581.26776
PA(20:0/18:2)	418628.2731	273398.672	478038.2728	363623.6479	354118.9784	357056.2972	331473.5705	479328.4186	222032.0293	269797.3647	256691.848	405207.0608	507666.4582	257733.3178	315107.1594	230525.1431	283802.1719	53685.39552	71156.71967	65062.55302	62884.88434	93725.78599	89111.72398	69774.97268	239655.3255	199772.3921	211507.3751	426070.0824	514191.6063	237289.9861	310862.0279	848956.5026	603978.9805	411182.5725	467645.8468	63368.38252	226732.6975	546607.375	107043.5431	627892.0258	200905.9384	429616.1597	721650.4259	191878.5523	195483.6496	103594.7233	107683.4664	57270.29325	145393.6799
PA(20:0/18:3)	3585.59383	778.1564161	4650.270723	9060.511369	2864.268802	3324.549032	7007.1349	4384.594387	3337.518842	8258.989392	6657.019872	4925.036886	18374.24398	2546.421241	3276.447695	1676.58806	1048.096297	1363.628953	485.5404185	500.9653001	482.7275541	1687.574016	1191.844756	988.4588495	5580.380775	4638.600514	3963.556767	7161.314253	8152.573192	4047.982197	4443.145807	6752.802892	4100.560067	6848.099821	6486.74437	1223.014899	2515.720277	8640.302802	2430.622577	7989.010384	1556.656088	7834.734931	10432.65592	6262.756634	4025.931324	1000.426876	3069.026571	4251.536887	3055.675344
PA(20:0/20:1)	0	1550.330509	3607.817737	2579.826647	3663.515284	0	0	7708.877364	5006.378281	4108.974317	0	1417.987928	1554.178334	1915.59613	3106.439982	2798.70724	1021.075073	0	0	0	1537.025409	1002.853443	485.4817061	0	961.6214395	0	4684.596291	1926.453324	3089.624927	2451.243127	5161.79655	2899.308235	0	2073.20324	2081.566452	0	0	0	1030.845495	1524.528038	1018.254156	1443.335803	2238.778766	1562.345878	1535.847671	1816.717091	972.239543	2007.61939	1291.446778
PA(20:0/20:2)	4663.410189	2907.632425	6204.349593	0	0	3914.146498	4625.951965	2313.785126	3902.631586	4124.855109	2603.726209	1485.358546	7237.849805	1653.046983	2600.339489	3841.763755	0	0	0	0	1559.043308	2561.448688	492.4844949	0	2413.783002	1556.674116	4512.266983	2471.269819	2327.514001	2960.822094	1906.262858	9402.041724	3873.667886	4678.267684	6222.860494	1552.336826	0	1539.927218	0	1770.597408	5195.568525	5921.171165	7835.892781	3071.483693	2041.020738	2450.906042	0	3540.854712	1781.309222
PA(20:0/20:3)	80839.01383	55302.23486	169604.675	68900.33482	80222.54829	131635.5722	95087.91783	135603.6344	62358.6396	140513.8455	88603.74181	70435.77882	77780.18237	48718.47718	70977.8191	141997.1446	47776.41765	6654.748119	7085.684264	9320.737947	6233.646556	10369.21274	25152.07675	10564.32348	52077.67153	32204.44148	97474.38479	101387.687	109086.6078	52632.19843	109671.9134	192272.6931	167928.6612	164778.3919	107994.1833	31298.43788	52523.29714	100885.6279	44224.70052	148646.4338	49096.26879	130746.9255	116599.2103	62712.11904	68369.12735	53178.07943	19871.31631	30168.85147	33919.20072
PA(20:0/20:4)	778029.2487	829280.7954	2780111.925	815092.9012	1408724.6	1872775.867	988824.317	2408204.024	878213.8828	2400734.612	1675350.483	999341.7954	1236058.795	631112.0829	1114961.548	2053455.299	970315.2691	145352.4373	137496.3738	138515.0184	98808.70584	106067.0995	223364.3165	141850.9798	459111.5518	335454.2944	968629.0291	1411485.867	1382224.252	611969.9398	1294975.187	2145784.915	1719554.155	1952276.537	1002312.877	709928.3693	516575.9674	1228081.277	508908.0205	1646555.406	368522.9506	1219906.481	1210212.331	671864.6536	860916.2449	503348.1402	429693.459	543561.4335	712318.1619
PA(20:0/20:5)	11661.50819	14058.12411	42403.57409	32743.85147	77215.153	29131.31816	40166.48736	84432.15806	23831.29163	33394.91204	18789.33163	15111.79699	46958.69732	9328.964376	29763.23192	44059.59928	12688.31941	2605.876553	7295.993504	5728.296043	3123.645792	2083.272631	8844.42255	2604.850663	7065.113509	12727.88271	33683.92617	52763.71929	31145.21945	6664.628524	18527.69759	57327.49541	43951.61094	88325.4943	55227.94538	6963.985802	25240.03189	23953.59128	16674.05326	24409.3306	25529.67527	38535.5445	34394.49985	20230.41183	11443.21038	6464.837738	6759.273989	5715.542171	2607.824236
PA(20:0/22:4)	98068.10617	70404.74251	327884.8228	53513.2736	160886.6742	284187.3608	66703.29347	162149.7394	97494.6664	678841.5382	514670.0586	153685.8858	147744.2681	93122.97724	91391.47425	344102.3486	132172.0978	14189.16913	4168.672132	4690.222692	13548.48617	17013.85746	26379.69381	21344.13091	41664.18777	28991.91325	120620.1793	278413.6605	274579.3345	92466.42152	259324.0185	262784.4105	158932.9684	61574.05407	80380.04478	183378.8996	48835.19343	212554.6804	63252.5441	310878.9473	44737.10206	84400.11753	144425.6419	135082.0505	90494.17698	66039.90929	56645.6783	158221.1062	170743.7129
PA(20:0/22:5)	69865.41114	54181.68306	167438.4628	65117.87968	88825.29045	109755.7881	60718.18571	160477.2988	73633.20602	342128.9592	209627.9673	70534.54493	102979.2647	85575.87703	73021.6566	183503.6574	77580.85606	10875.63639	8906.010255	10384.70101	12299.85596	7185.258922	11978.6859	7289.458841	14582.31356	23946.3423	107296.6798	85419.81254	148352.4711	51508.4462	124485.3671	177342.2859	96686.41218	122072.0831	77594.19431	41364.68446	36651.91778	133683.0684	45671.40319	129794.377	29816.2695	84815.85503	106762.4815	70840.08374	50472.05867	41616.24542	44598.82603	67392.81288	91900.27767
PA(20:0/22:6)	93124.096	81266.83081	193166.0541	104715.7322	96669.35951	112220.6698	100150.6762	238870.7889	62541.04208	97082.63367	93733.14714	69755.39781	124150.9891	65434.85366	77263.16211	132027.556	64120.39025	6085.506461	4177.928749	14516.37863	3727.885263	7267.33983	14131.36406	5688.853958	38284.24726	15645.37055	63251.92934	89964.49	63752.71849	33383.72815	90514.01721	151714.0839	85079.30866	122701.6243	98423.72338	28198.71299	33566.66375	116132.9459	59283.70989	66425.34933	33320.6344	62838.81185	60393.48686	47675.94686	46253.16043	42281.74266	31709.75676	23851.29205	39712.99343
PG(14:0/14:0)	0	0	0	333.879244	0	259.4330504	257.1891258	268.3508604	375.1875824	0	0	0	257.1872686	275.2056743	0	268.3399196	257.9543632	0	0	0	0	0	0	0	0	0	0	338.1289222	0	0	0	0	669.3114882	0	0	0	0	349.8747975	0	0	0	305.3592742	545.43157	661.8586195	0	0	0	0	0
PG(14:0/18:1)	950.6799079	0	831.0520572	536.076644	686.5059628	392.9505703	689.5609085	2156.448404	824.1315144	1135.077665	958.6384773	1092.356943	545.1374828	0	507.6048685	950.176889	543.976214	276.2750004	0	555.9881489	560.1596794	393.2162341	696.7560619	0	262.342709	754.3945435	415.6575989	798.458208	971.5406859	1224.616762	1610.098224	1245.227637	604.8763719	1777.192163	517.137195	526.3963664	0	1114.873367	561.8276932	2116.163691	800.9093304	1272.279126	648.1669763	1041.777552	678.2993318	0	1374.413062	527.447366	415.568293
PG(14:0/18:2)	1426.067071	519.5844788	652.7985224	647.6102598	373.3672798	372.8343694	1100.901237	1918.466279	524.8920617	1431.552239	1818.251903	906.2703957	1416.851695	0	916.0295232	1182.766815	1822.11427	703.011342	0	0	0	282.1171603	553.0055773	260.5948914	411.2528226	0	405.5635847	776.4053329	1643.505332	956.5151297	2314.9266	2219.681242	668.3921398	1697.01712	696.8845715	0	544.8307893	537.4307287	273.9240249	2583.261939	0	1241.383361	1545.015597	0	1677.295775	0	375.3133361	744.7988152	1037.26524
PG(14:0/18:3)	0	0	0	413.4906828	269.9620422	264.569582	277.1433359	0	0	0	0	679.7380343	0	0	412.0861113	415.9992764	0	0	0	0	0	0	0	0	0	0	0	0	0	0	360.4686604	0	0	599.9975984	0	0	404.5689755	0	0	765.3915827	0	0	674.5391111	584.3339915	305.8800951	0	0	411.723462	0
PG(14:0/20:1)	389.0979985	0	0	0	0	947.4778404	406.4507737	422.7857304	284.4912467	284.4912835	0	380.9688156	271.6883545	0	0	0	0	0	0	0	0	0	0	0	0	0	0	0	0	0	0	0	0	0	0	0	0	616.5807833	0	0	0	0	0	677.8440411	0	0	0	0	0
PG(14:0/20:2)	0	525.2659043	0	0	0	0	0	0	403.7488008	0	0	0	0	0	407.7356417	0	271.5108391	274.0093148	0	0	519.463391	276.2123604	0	0	0	519.2479632	0	0	255.3238466	0	369.1358286	0	415.8089412	0	0	0	0	0	409.4149999	0	0	625.9542782	0	0	525.9473572	385.3386726	0	0	272.6048509
PG(14:0/20:3)	510.5232614	0	0	0	380.9870065	0	0	0	0	641.2615164	0	0	490.851719	379.6873605	0	0	0	263.7790745	0	0	285.3526139	0	285.0247489	0	262.2245084	0	396.8002734	0	829.0153602	283.8362339	501.5120258	424.2239873	560.9155435	0	415.9408667	0	0	424.2045046	568.0115987	0	639.6716515	0	535.3783941	0	368.3381591	0	0	0	0
PG(14:0/20:4)	1211.647656	901.5438243	3702.639056	2036.263725	261.0726071	2584.807662	1766.437263	2353.683903	1226.637717	2160.30027	1799.202661	1227.172815	1890.406419	544.6089109	2481.294736	1394.728789	2171.9148	0	558.0898271	0	552.275376	698.1942212	419.7104527	0	837.4821248	629.2398955	1262.252608	1546.894496	3114.973619	418.7307183	1514.989581	2124.091329	1878.838933	2643.983326	0	1013.766725	1259.128269	1671.429282	1246.224258	2486.739505	1011.90302	1896.843029	0	0	0	415.2812188	1694.85729	1001.900271	621.1180227
PG(14:0/20:5)	0	269.9598012	926.2902189	429.3719036	703.7150929	0	0	549.6061655	0	0	271.4175899	563.0499504	0	0	0	414.2407022	0	271.040968	0	0	247.3024657	0	368.8101017	0	0	0	0	0	0	0	0	0	0	401.3473815	380.614335	0	0	669.3674922	0	0	0	0	0	0	0	0	0	278.0187762	282.6658393
PG(14:0/22:4)	410.7362174	424.2386625	554.3397502	419.6525996	269.0897754	422.7768741	0	269.0240919	0	698.9970032	0	418.3326989	270.9324958	0	0	538.4434052	0	374.803096	0	0	0	0	506.5639937	0	0	748.0182055	0	623.4500055	504.0264956	0	377.8885592	869.5038289	1146.87761	498.378581	0	1248.013625	0	748.6705856	0	872.8711934	0	1699.312682	1353.877232	913.7488097	0	1216.835966	558.510924	412.3127523	979.0345978
PG(14:0/22:5)	425.5199033	273.4903116	563.0975726	685.5443548	422.4071232	836.4899428	0	563.2295457	0	1266.029084	824.5715896	410.3445411	820.6570345	286.0037008	839.2853797	563.3383304	0	0	0	0	0	0	0	0	632.0244974	0	733.5263278	418.5606785	1304.96893	499.0172839	586.855589	893.2530897	655.8436566	832.3566919	0	0	0	0	0	831.3286174	0	0	0	0	421.8520463	547.0820889	422.1000527	0	0
PG(14:0/22:6)	1267.26228	268.8428138	809.9928243	395.730247	849.0762288	416.7498999	281.0623335	845.074557	954.5687408	283.9683155	286.2849607	430.8765032	563.1623433	409.8513632	704.2185075	0	415.9228619	0	0	831.6591697	277.0204573	0	0	0	0	0	552.5140082	669.2205009	552.6100344	692.1872368	401.1508785	977.1909169	391.0046279	1073.939276	415.2982932	0	0	0	424.1340661	672.0063793	0	1045.034324	902.3646518	697.7967288	562.5878142	426.1270973	262.6123128	287.1815312	0
PG(16:0/14:0)	1049.087877	0	1042.181724	1182.16011	1427.549298	1048.937192	0	908.7667514	1686.60097	1315.900217	1177.06432	546.2490218	395.6671481	527.049181	260.1094419	2887.388593	248.8325243	277.6700512	0	251.4158711	0	0	1515.048111	0	0	0	946.9380368	0	963.6005207	5762.089193	593.2900319	2191.528844	2394.736207	2955.59248	1093.05996	1154.210954	0	689.6681073	271.6707229	2817.164987	0	3840.403332	0	0	0	0	503.7010391	0	390.6510008
PG(16:0/16:0)	8325.769708	3511.470468	12041.29636	3233.837456	4497.942298	14296.72702	2988.435695	10286.89988	11601.46089	15619.78781	16031.74839	4432.941339	9061.686064	3560.81747	6532.714991	23204.38597	4439.880853	1268.894453	1657.792161	978.8653371	2524.817016	1260.997634	4638.252423	2238.788359	979.4998166	4098.945583	17131.98217	9893.104419	5630.259544	25388.99031	8906.335642	11862.91902	4723.492149	11356.87531	3284.053686	4998.717309	3645.549755	5993.541485	10878.42233	19220.54107	3876.262727	14579.41438	7341.67901	3111.375966	10430.61924	8042.225437	3902.346681	5099.423302	4736.735328
PG(16:0/16:1)	1229.910803	819.0017916	1775.246749	1786.664396	2180.284886	3014.785441	1089.311397	3425.525871	8621.509064	2434.127422	4762.890651	1089.619769	818.5304302	1364.330138	2051.612812	682.8419648	1095.103514	983.1260006	278.5773584	257.2828653	841.9687311	415.5997572	3076.203984	0	558.2672731	798.177599	3784.211293	5035.668242	1942.217253	32584.53291	1284.125345	4733.737023	5396.60991	4510.977947	3928.093041	5955.338195	555.0295078	1923.862488	4044.100058	9074.099545	2896.537104	13151.26136	2236.386353	1561.709506	2311.670354	5169.46678	811.7917143	1087.900425	679.56302
PG(16:0/18:0)	3891.605602	2786.911221	7032.917944	1693.341291	4617.867006	10636.45227	2105.232123	7856.929696	6457.880063	7273.703027	6799.15936	4511.564845	4399.540555	2526.616322	5782.153911	10862.02812	4478.719279	1526.903969	1875.234641	557.8462921	3324.467083	2217.389168	2577.614514	837.2130205	1395.197374	1873.461329	4349.525438	8385.020325	6300.948155	6070.422774	4404.295911	9810.970629	4237.882609	5071.514471	3649.056208	5931.645245	1611.851076	7206.332352	3088.783209	10335.59788	2963.471076	8537.484567	5412.812581	4338.057851	4624.812643	3768.555934	3611.272969	2508.498252	2779.058543
PG(16:0/18:1)	68224.24649	45230.61877	102528.5909	68758.79439	89047.63416	142698.173	49602.21803	126727.3025	154553.6111	109750.4661	178926.0118	101984.3158	86072.8518	56796.73597	106881.6562	106345.8277	40024.00107	18521.70512	25977.64327	7216.835829	45644.58648	23433.22474	57112.3718	14333.71821	12754.1791	24459.97864	117304.1178	195931.575	89049.26403	250638.7441	105211.0319	115149.4057	68225.98353	151887.1921	85183.39845	124734.6433	23614.60777	211005.2092	124620.6074	155480.5903	97970.59262	230774.331	76349.95425	82415.23834	167446.7447	96152.40327	117567.3536	45573.29121	72269.49126
PG(16:0/18:2)	49448.66747	12541.46821	28076.89537	21193.90475	27270.61411	55862.64359	18987.39877	37558.33306	77921.98217	75135.7759	57173.53783	28125.12368	27415.32136	24422.23368	40122.71515	52064.97589	25005.84497	12322.57057	15304.65245	4479.68834	31046.58229	11020.57238	29628.24119	8845.338946	3619.200731	10351.63213	32065.54231	40926.94827	24853.04557	102528.7359	25020.35714	32776.00843	27323.92755	38097.91118	28962.11092	23494.48759	11888.96332	51463.5517	45382.36021	68916.61794	25248.87697	65418.30997	35433.05139	26665.82752	59867.97385	25276.44758	31777.83679	14895.20238	14503.6304
PG(16:0/18:3)	561.828904	421.8418796	285.5698712	0	562.1884715	822.317856	992.5694251	706.0516987	2394.480266	2106.893535	2402.293317	682.0697618	707.5601294	280.3542631	0	564.8077442	1405.434427	701.9753906	284.0814997	0	1391.351364	556.3529806	0	692.9036869	523.8806426	0	1666.427107	664.8540861	696.3366193	4351.007425	0	1588.250634	1828.884054	658.4521435	692.2715931	0	0	1665.347194	828.7049222	1395.650169	0	1887.574364	1059.826453	358.8114071	978.5938603	263.6283335	697.322702	421.5186378	424.5775948
PG(16:0/20:1)	564.4105789	1690.967201	1263.481121	0	1127.09002	1127.620645	0	704.3460198	1691.105335	1670.80819	1033.048102	273.5378867	1268.590868	0	1691.436545	2114.241446	562.4039953	0	0	0	556.7645898	0	978.6485762	0	274.8096634	0	1808.616672	1071.687883	1808.992199	2369.389982	1367.658015	2147.147217	264.893926	798.1080862	975.4099359	932.8167948	419.9432869	2371.218602	697.6648057	2137.54407	803.8910526	2219.762246	1175.681557	0	2013.732276	0	1406.707947	0	464.1541174
PG(16:0/20:2)	16388.97611	6578.652571	15286.99642	10386.59218	13326.73331	19969.13709	6029.60213	14595.58401	18479.34989	18405.91691	27528.56359	18171.43943	15288.76396	9589.309929	10617.45396	11807.16958	4432.628263	1117.330229	2074.63062	425.9222848	1450.688587	1955.119126	6277.529731	4029.404953	1674.720125	2539.008285	13426.33435	14633.24547	10384.93959	21589.03584	16255.85441	21009.48671	9121.29017	20539.33481	10594.19678	7356.05325	282.335829	23238.94836	8792.604646	27544.44529	4973.91731	22211.66942	17026.75669	8510.779923	14977.74886	11140.43318	18504.50574	4678.278374	5831.133265
PG(16:0/20:3)	2663.592777	2387.123353	2108.599898	4373.027176	2951.287665	5168.529868	1669.608202	3896.184447	5320.779516	8160.860031	9780.456818	3353.903963	3234.109329	3935.657029	1310.349143	4044.012592	1393.372507	526.198274	139.4681793	838.2329643	1254.287111	978.1898613	2213.84868	297.378193	1348.586348	1066.495309	5735.23579	2107.480985	2713.837734	6916.71183	1444.07794	5932.91737	1126.003592	4960.569241	1951.032416	2374.260871	558.52207	4922.417297	2088.219658	4243.459635	2396.875328	7729.387015	3867.984205	1860.694874	2530.396671	3475.647745	4158.270783	1660.667402	1243.576729
PG(16:0/20:4)	13548.8138	3172.606523	8379.415476	2058.058923	5226.422224	23670.21317	3589.471478	20955.34337	8154.449993	17863.27573	12466.84074	1981.985583	2812.764682	4929.418458	22906.10123	24575.12129	9741.812602	6046.286461	6660.381369	2129.51065	9271.789822	6526.601469	7187.336469	1903.312015	1215.544412	4652.769218	4771.764612	8705.53687	15339.12929	17900.70895	6243.943131	9100.779998	6673.202732	9944.978439	6443.767522	5421.744478	9078.927302	9441.616011	7319.997618	27777.28376	3723.262572	14894.51501	14204.59788	11970.69336	7944.636127	1601.459576	12799.11687	2992.34952	7139.212054
PG(16:0/20:5)	0	524.9753846	551.1219978	268.771341	393.7013211	0	281.8714727	273.1915236	0	984.7552907	0	0	413.2028204	0	0	704.8169994	262.1722447	412.8001524	0	0	0	0	0	0	275.2	0	0	400.1288342	548.1666768	677.1930752	0	646.2893362	1095.366522	529.4874169	0	0	0	411.1213596	1221.621403	0	0	791.0293295	0	0	278.965541	281.6857769	0	0	0
PG(16:0/22:4)	426.6641552	0	800.8765659	0	281.3543903	0	261.9975	537.3745476	0	272.0376973	270.504399	397.1975606	0	284.3566712	702.0941975	0	402.6630849	0	0	0	0	0	276.2689225	0	414.2891204	0	278.0788999	687.2808388	1516.30552	0	1201.583433	1093.232983	692.6739926	534.9071186	0	400.6284159	0	666.4679664	275.5880372	1045.08273	400.4633663	1046.965638	507.2743613	1201.188733	413.6272442	0	414.539201	398.4568904	393.2704525
PG(16:0/22:5)	373.8425213	773.4614981	1452.944233	0	880.5837094	509.2386834	0	1285.08318	1018.17763	772.1157864	2315.685926	495.6131548	372.1123194	260.2056199	520.304602	505.6223194	1414.962333	0	0	0	0	270.8681895	0	417.1452919	0	0	831.1248438	931.1642704	550.2548931	831.6286699	667.750774	644.7618227	412.6807062	401.9618801	274.7157764	0	277.9500494	692.7848026	1103.756481	1008.111674	402.101362	1049.096506	730.4412527	1076.295488	363.1767731	0	0	0	619.9544158
PG(16:0/22:6)	1025.752102	522.2748842	0	269.1844234	516.7778368	2175.476714	1284.10693	1653.122967	0	0	249.9318294	268.156703	1542.517787	537.4903225	1169.867401	1028.112279	510.1425225	555.7750645	0	0	1108.336016	0	0	561.7946946	549.9264646	0	275.0038722	605.4775676	412.7552084	412.2128105	691.9430011	963.6427012	281.2478073	566.6865362	277.8672444	0	259.4608172	277.2107146	0	1088.614003	605.21745	2090.633252	3171.656869	624.2548831	642.3542247	506.7011326	760.9045961	0	266.8776195
PG(18:0/14:0)	255.310479	268.9562511	254.0003163	0	634.4055842	1199.606008	0	662.2837884	532.2780367	924.8611495	0	396.004	400.1789692	246.1516057	794.5971246	2264.777219	0	0	0	260.5577553	0	420.3669291	698.6130096	0	0	0	563.2739052	363.0639515	419.6335146	1817.56328	488.5987339	697.080928	275.0050464	484.006972	280.354173	0	423.1474574	529.4677106	505.9468857	970.2909534	600.8702994	654.9542334	669.8244754	0	382.2026526	397.1111213	0	0	369.9113789
PG(18:0/16:1)	825.1721328	414.1381902	1103.789559	690.4811083	966.6262204	1243.724403	420.1431724	1777.987643	1754.842653	966.9399111	1932.182048	552.6056032	1796.224067	966.124992	828.6998012	690.5558418	0	0	0	284.7039597	0	0	1255.882796	391.9055267	280.037498	933.7444753	3497.017876	794.087287	1674.853151	13809.34618	811.2535188	3486.279754	2233.349421	3674.670237	980.5849696	3756.727035	836.9270705	2626.386204	1723.599118	3616.262263	537.2761057	6716.111986	1047.814713	2220.811013	1376.998914	1371.833073	684.2606984	0	410.1577944
PG(18:0/18:0)	554.0524419	2069.652085	3750.903682	786.6918727	4542.282134	4044.547316	1117.440321	3832.726317	4687.647223	2453.536644	3369.94162	4213.521797	1233.701057	1453.521495	1402.296032	5883.951981	1310.679983	0	558.9178871	976.6654223	1512.439591	420.3917664	1802.251868	1397.47959	698.7497326	662.5518919	4458.958874	3110.711809	3529.648078	7381.639434	3887.677087	4000.49645	1082.455485	3466.552619	2843.525807	3089.434518	819.124353	6389.180587	2225.69126	4213.160746	2408.936839	7696.61991	3401.736409	2976.915708	6570.42113	2134.28351	2347.865897	436.7020855	2070.654672
PG(18:0/18:1)	51741.81007	24197.68909	55845.58334	29235.7002	82108.56865	94343.16264	27591.64058	88152.25207	111124.2587	68092.07305	99907.89489	77798.75796	36654.98902	33366.5536	62285.32508	71826.31987	23347.07201	12020.95771	11949.10183	12043.47325	25139.14121	11379.33378	41815.22299	8086.896176	8664.986812	16216.05202	92172.90805	101504.557	57902.67732	140522.3628	56310.56425	64223.15956	23663.6165	63987.46384	40803.82403	105032.8764	18572.04285	116915.1232	43903.4041	74206.03317	42067.14536	149302.4433	37864.97122	47667.57458	162391.671	67280.27363	67798.95447	21840.08384	42208.41589
PG(18:0/18:2)	60545.7464	42773.51399	61142.10607	30622.04978	64091.02211	99749.4157	38504.73679	70973.18485	108716.7345	105844.0496	128013.8083	75316.65803	44617.00756	44890.97112	70502.43208	79940.09291	40506.67252	12958.38724	14873.44167	8659.445184	27814.58629	13026.96645	35169.03121	18031.87709	13748.73994	15057.94939	76198.22674	73521.22965	52578.9173	178583.4374	50022.39735	58307.37887	24532.6307	79973.70904	37840.96902	59638.23463	14650.76102	101983.1062	52891.86986	105701.2879	36517.58219	157215.3117	63328.73838	61435.34552	130665.1663	87614.84688	59806.60823	22687.55686	38636.62257
PG(18:0/18:3)	1151.152901	0	1552.933789	394.011214	538.4466436	845.5934669	0	843.7312768	2255.282221	1690.106448	2112.135033	564.5794643	702.4011066	1677.728433	1268.519747	566.6338807	704.4432588	1256.121395	0	0	1676.330961	0	277.0135051	0	0	604.0881028	1534.739756	729.393001	698.0266658	5016.754768	851.5091503	1113.330234	559.1489496	1456.368069	270.7276733	605.9127184	699.847267	1675.019954	415.8263782	0	0	2667.040416	1332.085184	975.5503931	409.1607243	798.9561149	530.7248961	0	273.5253498
PG(18:0/20:0)	513.3342319	659.6307329	2054.030233	1264.972126	1054.080599	1250.069054	1110.146408	928.4591989	848.1390861	1780.513665	1066.620206	988.5887093	744.554319	1311.799921	1058.025698	566.8918752	1389.130779	346.4903126	379.3863717	0	0	0	576.4008662	0	380.0517771	454.0528486	616.0124652	451.4828847	1245.090423	695.1688761	925.0411192	1671.325164	463.4792854	920.3084104	713.9384403	698.7097934	464.9197065	777.7865509	932.9067645	1062.193019	0	1357.27722	2535.257639	1153.999468	906.5745964	708.7081862	625.59377	294.3250712	947.916013
PG(18:0/20:1)	697.7740684	384.8240953	0	561.885624	701.5721488	1089.520674	411.1263794	684.5572027	4436.92355	1681.335022	1105.447675	1240.816782	555.2788497	392.436526	555.1761798	1247.853839	276.144021	277.8874941	417.6928924	0	556.2061853	0	1250.679721	0	0	937.2147509	1518.243397	1873.875181	0	2633.946281	937.8721774	946.7385399	553.811059	937.1056242	0	0	971.3393857	965.0045995	0	1606.16698	925.9756467	1648.983432	1146.467628	0	2010.468552	932.4089108	673.3898013	539.8398358	0
PG(18:0/20:2)	8818.986234	3976.019373	6171.635867	3517.225652	8691.561322	10855.70142	3372.889411	6726.411198	14865.26402	13930.97497	16508.45928	11588.01215	4331.359541	4299.292834	7178.333487	7295.322904	3243.687689	1250.342507	1807.074997	403.2716906	1945.743887	492.3515458	4030.712231	2069.579764	2551.465353	4022.670112	13560.26714	8900.367105	6560.253009	13087.31437	6440.122177	7760.25259	2496.027229	9553.604385	4719.223781	6266.693467	1805.007909	14937.55127	4295.97992	12474.33889	5021.670771	20087.62642	6129.083288	6055.102009	26082.88217	9223.114278	9150.808369	2564.766184	2440.338597
PG(18:0/20:3)	3736.420503	1514.897206	2708.938797	1127.224076	1662.44141	3067.598159	404.5869149	2181.272989	8344.116293	2892.365657	6063.307763	1320.096412	1691.34683	1526.568834	2529.706847	1533.394134	975.918598	0	0	0	831.824962	551.1680242	1378.555954	543.9263332	831.3707181	1339.097468	4592.938053	1708.815963	1901.377421	3358.173461	1942.231221	3506.419628	1382.28615	5405.763615	2621.327118	2279.634361	422.4463499	4152.16207	1724.221297	2848.962354	2142.10705	13205.43603	2743.535934	2236.446203	4830.408037	2966.214942	2172.530064	688.176947	736.3115231
PG(18:0/20:4)	7499.749154	5306.755576	22615.07264	5214.952889	12159.47914	22215.86601	6072.322634	19188.54262	11471.77962	37053.53441	26981.79644	12195.15525	10307.27836	7119.006773	11050.13935	20952.83906	9391.686437	2228.772313	1840.889076	0	1310.299501	789.7466642	3805.797305	241.7738829	1573.306335	2842.272544	11429.85743	10770.55193	10170.75273	17487.56518	8644.004336	20811.67798	7378.832074	7753.117497	6701.281332	11309.71728	5822.506765	12198.4525	6242.089252	23844.88483	3729.861281	9837.690652	9986.414644	9030.894611	10523.8399	5022.070861	10372.91971	5172.369431	9733.40452
PG(18:0/20:5)	441.4992626	0	383.5234578	358.5599765	263.7899161	658.8851894	530.261989	0	528.0174003	0	305.4945072	0	264.2971021	0	0	276.7003299	544.1709124	0	0	0	0	0	0	0	0	0	0	0	0	0	381.5899884	0	0	0	0	0	664.6675573	0	0	768.624	0	0	0	0	399.2384461	258.246175	411.2094597	0	264.8207686
PG(18:0/22:4)	526.5229086	265.0219414	1056.333815	0	0	646.4359284	0	0	0	1067.962842	0	0	0	0	0	0	555.6486645	0	0	0	0	0	0	0	375.912956	0	0	0	647.5142028	0	0	909.6133959	707.3145957	0	0	0	0	645.1524196	0	385.3472127	0	1159.178569	0	389.590271	528.2806341	651.9763503	0	389.274986	0
PG(18:0/22:5)	389.971439	0	0	0	403.0924647	385.4707775	564.2356787	672.2881796	665.499181	533.7494211	537.7106623	671.8815505	537.4352433	403.4914685	268.5938956	0	0	0	0	0	0	0	0	0	0	0	0	393.9293079	678.0522814	659.1145258	0	0	0	523.0412837	0	0	0	401.3022822	0	0	0	1148.09274	737.0189811	1308.70488	0	262.8056407	287.3257653	265.5416376	0
PG(18:0/22:6)	0	711.3162702	834.8974372	0	354.6458753	1300.531983	480.2427293	1192.925516	361.9678073	0	0	360.8226519	473.0010732	598.6342449	1921.139456	1316.623645	0	0	0	0	0	0	0	0	0	0	0	0	0	0	0	514.0852431	0	0	0	0	0	0	0	0	0	1484.265187	673.3045275	0	0	0	0	0	0
PG(18:1/16:1)	4838.916473	2554.286534	3645.535059	1662.379925	2806.633626	4848.017128	2775.526787	2768.318583	3868.170515	4537.664065	5737.467199	3567.149982	1864.071227	2527.642308	2109.473791	3991.329508	2248.512341	698.7533189	700.8953426	419.0837836	562.4204452	2375.16345	2222.303404	838.0057538	2492.961283	1198.417546	3806.790203	5028.992172	6480.961451	7427.478227	4283.530316	5522.750597	4041.16099	3409.02188	2818.463512	2957.200147	1549.987889	6969.084346	2622.564159	4667.750821	1682.16052	6221.660145	1601.253117	5945.811445	2680.868968	2941.95166	2943.161592	1808.979885	5083.935577
PG(18:1/18:1)	12796.23513	5588.569949	16035.00912	11289.54862	10969.87841	16139.49941	8316.543983	15431.51234	29892.58965	13296.49533	22828.65185	11460.82183	8632.06598	7841.356844	17458.05117	15919.62992	7331.219667	5556.082792	3255.961362	1251.255854	8872.985119	6514.180759	4340.850445	835.2395359	1237.389906	2926.984992	7473.637338	23087.52329	12925.27788	19399.14875	14003.23391	19038.47797	6323.786642	8777.217303	8730.274694	15928.52091	3811.946058	17168.79412	10323.229	15226.94652	10506.15994	26152.34081	13534.61851	19418.49447	21746.00886	9713.418693	10576.30275	9177.56323	7721.97303
PG(18:1/18:2)	30451.78758	27735.58475	53074.43868	50798.18525	52369.42677	41408.06582	40214.55477	24345.80072	100329.5269	37444.76533	117187.8665	103296.6747	65572.45397	71340.12873	50385.58239	24137.93697	34118.01343	2027.31933	3252.915905	2104.848994	6177.182108	3484.192547	9873.717753	7198.169672	3338.701844	6860.457709	28193.1059	32710.05277	39345.69568	95350.7475	38309.04083	38061.05257	27618.13492	26977.31099	51706.51024	20519.50929	10377.72856	182580.3377	30215.53335	25299.56357	185334.9339	155335.9318	66870.28685	40834.64344	92096.30997	51233.20047	206149.8895	37836.4822	71221.99426
PG(18:1/18:3)	2415.472586	1812.856392	1651.380873	2742.527144	2011.497133	2024.198327	2523.661853	2127.991936	4236.984654	1600.003872	2923.46689	3197.574822	2371.125457	2157.115135	1531.997441	0	1607.786039	0	279.0286787	276.2779979	1250.739286	0	263.5645148	0	395.345045	0	0	0	555.0395611	418.1606553	0	1254.414075	700.7721907	1336.379457	0	0	396.0367346	1254.312322	0	803.4663458	0	1465.036889	500.0845495	484.4520381	1743.537723	0	0	0	486.3966131
PG(18:1/20:1)	0	267.988605	0	0	0	422.4645127	0	540.5514949	421.2463014	0	0	421.2439226	0	0	409.5094692	0	0	0	0	0	0	0	0	400.4385163	0	0	0	0	395.1801169	0	0	0	0	631.0190931	0	0	0	665.184463	0	0	0	0	0	656.3265767	0	0	0	0	0
PG(18:1/20:2)	1567.495186	0	416.3697965	1247.997541	0	317.9988742	0	398.0627513	2185.523468	690.3608192	839.2320376	1105.489422	684.7254009	274.2735877	556.1568785	397.9465922	0	0	0	0	0	0	0	416.3785228	698.2063638	0	974.465759	808.9831864	694.7747332	423.3956238	496.9003593	975.4047258	281.3437714	535.9139026	272.3321141	0	283.634742	1531.657962	0	670.6223637	402.1582023	647.0367772	379.6881593	0	277.8569189	268.7295608	544.2730163	0	669.6916778
PG(18:1/20:3)	557.9052994	0	2196.262524	507.4534531	523.0818097	559.2628121	384.8361887	0	1708.013062	901.6885577	1033.844255	885.9484444	878.3646418	638.9094957	904.769855	406.3004277	391.4593186	0	270.8784502	0	384.236569	410.0688356	278.1260044	0	411.1875001	0	820.4558544	797.7914522	810.6603732	1081.181379	1330.144189	2100.283663	684.5070387	398.7889631	0	0	0	274.0844229	1356.297575	926.1197462	0	1512.41371	934.9580174	519.0094794	1160.686169	508.0322321	0	638.1389398	386.2933427
PG(18:1/20:4)	4932.43707	2928.642895	3920.955232	4361.895613	2661.132987	5096.227831	997.9029361	7064.956669	4410.863105	11444.432	3713.665808	2280.390517	4684.311261	2168.945393	9519.213096	10758.79703	4367.338438	861.3264854	527.9617746	663.7091094	1200.985602	1067.228564	1333.887999	671.3946944	1466.250743	1887.226969	2620.928788	6134.210672	6898.096655	4453.846617	4460.546081	10238.0534	3396.525156	2597.50869	1649.856122	5492.10772	2264.9926	3674.456733	3303.746263	7579.288836	2346.768841	4819.04319	3645.028069	4889.927699	4412.489475	625.5789456	2879.058368	1788.397603	5167.599707
PG(18:1/20:5)	539.6699467	366.5388922	244.6243972	244.6275004	0	899.7429277	254.029244	0	0	878.9851606	492.6752814	0	367.4616809	244.6429624	376.2495115	0	525.4906898	0	0	0	514.2985462	414.5663409	0	0	0	0	413.3697704	525.3107123	410.5956661	0	0	413.4145157	675.676656	0	0	0	414.1409695	413.3924823	275.5925439	0	395.0224963	0	0	541.984107	0	0	0	0	0
PG(18:1/22:4)	0	0	265.7464574	384.3417438	375.7317624	751.8891928	0	0	375.9236851	1429.727859	515.4672337	256.4281566	500.1355926	256.0317604	257.0990939	378.9059486	634.3117945	0	414.7646239	0	264.238527	561.8857422	0	0	0	0	415.9958042	390.6087173	782.7309871	556.0888069	0	828.4310949	413.7663003	0	0	400.2386821	0	547.9186031	0	996.7048275	0	811.2171736	532.3983314	677.2609292	0	0	0	519.9902529	1191.79448
PG(18:1/22:5)	0	0	627.8471872	285.5751921	389.5823204	540.4179293	0	623.5667371	268.4911794	375.1147598	748.9586593	563.3151727	268.1470361	376.2609256	255.1394315	264.1715122	374.8975926	0	0	0	0	0	0	0	0	0	0	740.820097	328.156787	0	0	559.4537948	442.645994	0	0	0	0	0	0	857.8720545	0	0	0	541.4183647	251.9229716	381.7577986	318.0417178	0	379.1848905
PG(18:1/22:6)	736.6677868	0	626.5801169	621.0246649	488.5786951	489.1733602	990.3985539	250.6241784	0	494.1111764	390.2582685	251.2110969	496.0044285	0	1252.232245	991.909873	375.8732481	0	0	0	0	0	0	0	0	0	0	332.4876807	711.2031197	451.9612058	0	1508.062798	0	834.2383077	394.6533271	0	0	0	831.8239196	0	0	0	544.4120711	0	245.9213347	514.4196368	0	0	0
PG(18:2/16:1)	9655.909856	7992.604061	10493.54833	8758.656288	7167.006678	7851.683263	3700.058839	10018.53312	3721.371353	7499.622194	7136.90199	7836.290846	11806.23755	7889.095298	7309.90524	5971.044737	8403.922552	1708.575182	1331.163682	1730.417408	1159.075289	793.4864014	1996.753183	2389.347956	5010.095935	4379.344534	5520.159863	9144.572665	12338.0972	3181.345268	5134.173699	13485.25739	7493.213593	4081.22786	5295.685873	1779.791893	2108.639893	10184.12139	7708.952135	14760.25852	3495.050024	10569.0759	31279.24672	6533.591665	5554.344129	4339.522696	3739.501263	3350.46995	5415.540713
PG(18:2/18:2)	10697.77655	5490.58835	17202.82302	4942.432069	5619.288639	20529.26696	3235.86285	13645.48899	10617.7384	29167.95679	21989.62388	8961.86822	10481.27774	6894.080465	11186.59738	24913.86543	8257.4289	2087.786833	1362.145127	1817.465867	2607.101156	2647.210671	4609.951181	4189.946641	4494.223492	2916.517424	7740.140432	10418.17288	21629.50593	9681.397033	11731.60461	18275.65542	7948.864553	3746.623665	6151.069726	8541.731823	2425.627149	13242.46603	8103.317728	16276.21926	3920.178303	5722.557752	10641.91396	18384.04364	7975.153683	5205.284678	7187.372883	5008.436709	10401.05383
PG(18:2/18:3)	1575.33227	2315.468233	1187.369646	842.3446103	602.2183376	1222.064385	1522.809164	1484.656088	2683.527454	1791.896047	2118.230254	3193.139943	1814.517472	2111.157462	724.0671436	765.8890648	1423.876055	0	0	0	0	0	0	0	0	0	1367.483019	1017.753603	1651.85897	1656.28737	0	1330.653171	1319.983532	1348.509191	1577.217309	0	1036.949497	1984.361653	0	1385.760554	1703.824504	2208.678896	1619.689784	875.0939282	1279.284173	856.3804072	4309.592662	0	589.2341379
PG(18:2/20:1)	0	388.8581596	0	560.0095166	406.5160112	287.4477145	386.2452795	0	0	1110.90109	0	420.7038595	272.1568493	281.823782	269.1182882	0	0	0	0	0	0	0	0	0	406.35	0	0	0	409.2545531	0	338.0941671	0	0	0	0	0	270.9011506	0	0	0	0	0	0	0	418.6295692	0	525.3322544	0	0
PG(18:2/20:2)	1834.251369	2377.646326	1680.830574	1444.605585	1878.682831	3281.248643	1653.073088	2403.734282	2292.02647	7945.596866	4134.547387	2768.452693	1964.912985	1496.723689	2350.712239	1824.992106	1629.055687	0	0	0	0	0	0	0	0	0	320.511191	2325.320859	3970.104155	1173.537437	2179.253531	0	1996.066794	1487.831404	1538.50434	479.7105443	0	2746.934049	0	0	2990.724521	1813.226955	2548.727365	3381.649086	1553.518525	0	2906.939493	908.6279742	2896.637758
PG(18:2/20:3)	0	440.8014604	0	454.4875503	1217.569138	1570.089333	328.4451776	1115.523352	554.4860146	841.1707799	2453.400852	1170.346176	768.1241484	0	0	1227.966989	455.6043041	0	0	0	0	0	0	357.1546027	0	370.6140688	0	0	960.8601905	351.4111353	1175.64046	362.4466386	0	370.1913485	646.3929352	0	0	0	358.881746	0	0	491.871144	1283.043611	2290.527006	2624.021107	0	344.0752388	0	348.2868749
PG(18:2/20:4)	5065.447472	1720.562459	7963.894168	4007.854617	5384.076793	6758.790369	1879.513336	9536.498279	2707.285015	4904.394633	4611.579269	2633.766542	2145.760613	1365.775134	4956.663425	4097.91844	3383.334557	0	0	1130.928302	1262.523677	0	1278.905904	1356.982145	1274.948387	1225.540432	1347.445653	4390.064969	1206.975695	2006.945761	1940.487436	2506.147482	1877.503063	3136.167543	1904.791631	2027.830523	1014.548725	1676.132111	1671.586587	3660.732369	1077.134014	2441.800419	2444.334751	4504.414931	3893.878813	954.3448013	941.148643	1372.692732	2578.02973
PG(18:2/20:5)	0	256.2074833	0	555.3479879	0	386.140974	447.4992029	262.7358513	262.6735322	0	401.5395785	559.578875	0	0	262.6669191	393.8750327	380.1408108	457.8682716	0	0	0	0	0	0	0	586.8413043	0	0	0	0	0	902.9774631	0	468.2815215	568.7759709	401.6889945	0	0	0	400.928	0	388.9183988	0	482.6135084	0	379.424669	0	0	0
PG(18:2/22:4)	0	0	503.7462205	0	0	397.6615423	260.0429068	0	387.3111635	759.4733156	0	651.3339569	0	0	252.0628091	516.4988755	531.3117272	0	0	0	0	0	0	0	0	0	0	856.8546382	0	0	0	0	638.4261355	0	366.8011618	0	0	0	0	0	0	0	0	524.8440751	258.6938473	0	389.3639453	0	653.0224618
PG(18:2/22:5)	0	278.9240613	262.3210727	394.2489886	559.6840987	404.7838425	0	0	397.2963222	262.7008376	1049.863487	0	550.1494517	359.9962683	416.3885234	642.2982737	265.0364542	0	0	0	0	0	0	0	0	0	0	0	0	0	0	0	0	0	0	0	0	0	399.5378414	816.6792365	0	366.5290609	0	0	531.2773655	0	0	0	0
PG(18:2/22:6)	0	264.5971667	917.8206713	520.9441035	537.9610123	536.0954123	283.4429308	267.8526646	701.3968982	401.745799	524.6374335	264.8325741	0	0	536.3415869	0	0	0	0	0	0	0	0	0	0	779.9942708	399.4006916	781.2169775	0	0	0	0	0	0	0	0	933.2741961	406.3011859	0	0	781.3513826	0	772.7920931	0	565.8716753	414.5713501	448.6120714	277.5447897	0
PG(20:0/16:1)	259.5850246	0	0	399.1620774	0	0	0	706.604741	0	0	266.10547	0	0	274.1749554	0	0	0	0	0	0	0	0	0	0	0	0	0	0	0	0	0	0	0	0	0	0	0	0	0	0	727.2111936	388.196458	839.5530161	0	0	0	345.3602961	0	0
PG(20:0/18:1)	549.3824158	410.9930405	685.3381349	388.3936209	407.4627587	705.7048366	528.8834835	709.8618899	363.3418708	975.3525602	395.4983123	967.7470118	948.7322542	716.0498997	405.1447627	852.5873218	274.9189928	0	0	0	0	0	0	0	0	0	0	720.3535457	858.3429984	0	0	924.541286	0	446.3842236	0	0	0	1316.550182	0	505.85339	945.2537682	1354.980632	0	2244.422226	1391.295088	0	2286.997316	633.1837069	0
PG(20:0/18:2)	1139.249941	669.6398405	946.8165055	918.8591005	931.1467694	659.1586107	776.2210914	673.5574554	540.0622382	1495.650073	699.7373974	946.6082588	826.4627456	388.7613922	810.9974022	946.5720821	378.391889	0	0	0	0	0	0	0	0	0	0	0	1105.975371	0	0	789.9348594	0	939.6836918	0	0	0	0	0	0	0	877.9469961	610.7815144	1184.569618	532.8355332	0	406.2677892	0	403.3889892
PG(20:0/18:3)	270.0960608	839.6903727	0	429.8663357	409.3398272	0	0	411.7556763	273.5245611	0	393.8399814	287.1523396	0	450.2958372	0	0	423.3287406	0	0	0	0	0	0	0	0	0	0	0	0	0	0	0	0	0	0	0	0	0	0	0	0	0	848.1431101	0	405.1749341	0	564.8971775	547.2682102	428.9807777
PG(20:0/20:1)	0	0	486.5526354	0	0	0	0	0	335.4821521	0	0	0	0	0	343.6766381	0	0	0	394.8142317	0	0	0	0	0	0	0	0	0	0	0	0	0	0	0	0	0	0	0	0	0	0	0	0	0	0	0	0	0	0
PG(20:0/20:2)	0	476.8757778	0	514.6179175	271.7374295	0	0	0	0	0	0	259.6022492	0	0	765.150114	0	264.5249537	0	0	0	0	0	0	0	0	0	0	0	0	0	0	0	0	0	0	0	0	0	0	0	0	0	0	0	0	0	0	0	0
PG(20:0/20:3)	0	508.041128	0	0	378.365192	0	259.1751422	540.8757353	258.2203337	0	270.5706739	0	656.4340755	374.8121651	0	377.8136166	258.8803425	634.7048529	0	0	0	0	0	0	0	0	0	0	0	0	0	0	0	458.3731864	0	0	0	0	0	0	0	597.4960757	0	0	0	0	0	0	414.7107683
PG(20:0/20:4)	854.468418	888.6317842	670.807218	401.7412353	631.4160683	1324.562135	497.9850036	1488.056856	533.6713261	1240.894508	375.1293034	905.6554569	633.8186697	792.9249494	537.1013085	1652.78	1017.560922	0	0	406.349869	0	0	0	0	0	538.2910759	840.9249527	645.5760832	0	0	0	1276.520387	0	0	0	0	0	944.3803199	0	1755.363194	0	1191.688876	1190.415054	0	873.1664273	492.6152275	381.6647506	472.4936419	735.2951194
PG(20:0/20:5)	0	0	0	0	0	0	0	470.437508	0	0	0	0	0	0	0	0	0	0	0	0	0	0	0	0	0	0	0	0	0	0	0	0	0	0	0	0	0	0	0	0	324.6905185	689.9293222	0	0	0	0	0	0	0
PG(20:0/22:4)	0	0	0	0	0	0	0	0	0	0	0	0	0	0	0	0	0	0	0	0	0	0	409.0140065	0	0	0	0	0	0	0	383.0933055	0	0	388.340328	0	0	0	0	0	0	0	0	0	0	0	0	0	0	0
PG(20:0/22:5)	0	0	417.2288146	0	0	0	0	0	358.0000771	258.3313206	0	0	532.2485559	0	0	401.0964191	0	0	0	0	0	0	0	0	255.571722	0	0	0	270.7374584	506.5926755	0	0	0	0	0	0	0	0	0	0	0	0	0	0	0	0	0	0	278.5307527
PG(20:0/22:6)	0	0	525.313011	0	656.8591749	0	274.9054426	264.3344666	0	0	641.9206393	0	529.1296851	256.2872601	385.8122236	0	304.0020445	0	0	0	0	0	0	0	0	332.8264117	0	0	0	0	0	0	0	0	0	0	0	0	0	0	334.1055713	0	0	0	513.609604	0	0	0	0
PI(14:0/14:0)	233.2881609	422.5342253	0	0	493.3040489	0	0	0	706.0963107	0	621.0907612	0	145.4440013	157.7178642	0	286.7782534	157.5060282	0	0	0	0	0	0	0	0	825.6188643	0	0	0	0	0	0	273.5506024	0	0	0	0	0	0	548.3137787	0	589.6769041	0	465.2064228	0	0	0	0	0
PI(14:0/18:1)	0	1479.412306	5562.247755	0	634.528135	0	0	516.3385989	0	869.8487056	0	0	1472.717992	0	0	0	0	0	0	0	545.25811	0	0	0	871.9533154	1119.819676	8848.040364	2950.312751	7536.548163	3996.14079	6343.776442	3530.56821	13209.56645	715.1628086	2288.19535	2268.097472	2451.925341	3420.930639	884.1876984	8243.487727	4513.480151	2838.766145	2806.580311	6355.88771	5580.137312	4127.011264	3664.331964	1762.633321	1161.391105
PI(14:0/18:2)	15518.0697	15067.17332	10632.40236	9894.38547	10044.71731	16471.71056	12222.9924	11300.61112	8340.516775	9729.603465	10947.45166	14628.01208	17086.70969	15786.94394	11828.65803	9085.567247	10960.8466	886.3264237	888.6042474	586.3274167	888.2521114	1177.790281	1523.985576	1475.52175	589.1684421	3700.892901	24783.90377	7674.674495	12143.66943	4880.235064	13065.79161	13617.31374	21775.43649	7673.394767	11477.56072	1934.492611	2884.272715	9650.23204	3872.899054	16620.04661	7365.257774	12284.69703	18726.16905	11553.30375	8038.480224	3624.178464	6699.130893	2647.539915	5830.946942
PI(14:0/18:3)	319.9389706	0	0	0	0	0	0	0	0	185.4085481	0	214.8678843	435.6265589	0	0	0	123.6783146	0	0	0	0	0	0	0	0	0	0	0	0	379.6031562	0	340.2242939	0	0	0	0	0	0	0	511.9663898	0	0	0	895.0638113	0	0	0	0	0
PI(14:0/20:1)	0	0	575.9178156	0	1146.168507	0	0	0	0	0	0	445.8443663	0	0	0	0	801.6111591	0	0	0	0	0	0	0	0	0	0	0	0	0	0	0	0	0	0	524.4730281	0	0	0	0	0	592.6242383	892.3642576	671.2300245	586.0760392	318.6496538	0	0	0
PI(14:0/20:2)	0	0	624.1491075	692.8501623	0	0	493.5513648	0	493.3060512	412.8867209	0	0	0	0	497.2573415	693.3844007	0	0	0	0	0	0	0	0	0	0	0	0	0	874.55551	0	592.1972807	0	563.6917073	0	0	0	869.7931436	801.2540974	852.2334381	0	0	1629.64359	904.4004656	0	0	496.8271981	0	0
PI(14:0/20:3)	4666.098244	994.0168761	5059.308275	4178.944763	4277.287519	1538.08177	3094.984334	2192.239156	4998.271199	1432.210541	3391.662003	3283.856843	2472.793181	3107.099772	4058.758105	1680.258578	3618.244241	996.8063339	953.5727138	2411.769159	236.2702461	2892.205418	1192.148759	2083.26816	1688.277129	2501.108803	2626.230473	4475.242222	4096.398812	2981.86371	3879.22738	2587.526307	1590.753024	1969.358325	1085.417546	1079.371316	1901.93646	4733.014199	3054.059094	2107.258736	1400.901748	2520.206801	2689.817614	3037.540026	2048.500399	1058.677638	2156.036162	2394.205589	2566.090552
PI(14:0/20:4)	8733.980948	7278.827945	10143.1491	5573.357321	5533.890636	8131.129902	7824.702296	18545.51873	5130.648504	5098.19184	3345.563808	6943.839024	5674.659642	10863.41415	10017.77473	8215.909858	5010.517734	0	0	1137.190454	0	833.4112406	0	550.009101	1121.123347	2015.564934	7299.870699	6583.959366	15138.43504	2001.511892	4679.665818	7422.49559	8701.291304	10071.01965	3510.336241	2589.347436	2963.324003	5359.807892	1421.80192	5874.539655	4118.741085	8482.371436	9439.223496	9286.228264	9690.289946	2756.652026	5488.275308	1160.975335	2605.896902
PI(14:0/20:5)	829.6492782	1495.562878	1953.592488	829.8615384	0	869.2162468	0	3908.931382	553.8576003	1167.230808	0	1775.66355	1391.226829	0	837.7395045	0	1387.812841	0	0	0	0	0	0	0	0	0	807.5624244	1446.198601	1136.717689	572.4618645	1460.830059	0	2160.376348	1555.877024	0	0	550.3926624	0	849.1730683	1166.084111	0	1747.895861	887.491573	1026.169199	4622.025958	583.4612168	0	0	0
PI(14:0/22:4)	0	553.9326864	588.0592483	552.8271104	0	1406.259908	1400.300158	3114.068126	587.1775881	0	843.0981371	0	559.2928211	881.6393089	845.7583706	889.6524691	841.5934386	0	0	0	0	0	0	0	0	0	0	2636.810339	0	556.2610129	1444.647029	0	1353.15855	885.0638133	0	587.3322916	0	0	0	2043.862811	0	2982.655858	1502.149021	2085.627646	2020.188642	0	560.0162399	0	0
PI(14:0/22:5)	2107.95723	1174.883097	1382.379372	561.9822949	2485.906233	2588.313116	784.7077516	2232.227134	548.8139357	1109.837336	0	1042.768546	1110.268378	905.7353572	582.2490596	1926.316155	1451.484592	0	0	0	0	577.5307615	0	0	0	0	1076.769736	1380.153256	1402.91788	1382.842063	0	1412.291829	0	1455.887461	826.624274	0	1729.52491	1006.015763	0	2038.258987	893.3851273	2689.480026	2398.991054	0	1445.4983	0	1133.218475	553.3015543	869.5077664
PI(14:0/22:6)	0	499.9246609	1134.343016	686.0645788	229.526243	568.1816631	848.8169783	0	681.6128867	0	0	0	1416.299267	499.220593	1099.996022	1368.970114	0	0	0	0	0	0	0	0	0	0	518.9548338	824.7026629	0	0	823.6095773	0	0	0	0	0	0	480.919727	0	560.5376006	0	264.7141754	0	0	0	0	0	0	0
PI(16:0/14:0)	0	0	0	716.7653961	0	0	0	0	0	0	0	0	0	0	0	574.6328306	0	0	0	0	0	0	0	0	0	0	0	0	0	0	0	0	0	0	0	849.4541392	561.3485337	936.2791268	0	0	0	593.7345871	897.2951793	0	0	0	0	0	0
PI(16:0/16:0)	1038.571566	0	2092.299209	0	1045.437412	1567.492536	1027.893762	1566.971076	0	1552.25985	1733.2419	2053.7321	1996.411232	2041.901792	1595.163806	0	0	1005.046951	0	0	0	0	0	0	0	0	487.1563803	354.7151056	0	1283.503072	893.4543343	0	1036.276382	1128.947013	708.5234625	0	0	0	917.5691325	707.6141159	0	803.5980611	2140.822196	0	1072.954748	0	0	0	0
PI(16:0/16:1)	0	0	0	1051.092893	1998.032181	0	0	1498.152696	1493.643527	996.9998461	1044.125724	0	0	0	2074.232044	0	0	0	0	0	0	0	0	0	0	1523.176054	0	0	0	2094.464858	1483.627381	913.6361057	0	1314.270875	1559.047807	0	1377.380519	1132.434118	0	1823.075387	0	0	0	0	0	1019.604737	0	0	0
PI(16:0/18:0)	6491.704844	6275.658666	4589.393771	5387.648396	1607.326281	9737.799509	1949.465818	3133.458421	4137.112975	0	3985.450078	1823.983048	4762.344736	2579.445433	4872.298796	3440.118746	4603.424263	0	0	0	0	0	0	0	1562.259947	2355.132578	2305.106669	2970.974899	2565.170075	1909.090371	4224.373543	3499.9552	3064.876669	3447.222982	4662.464438	0	805.2497402	3649.433071	1032.469672	6831.044023	0	4865.380794	2552.764598	2645.306085	1162.627947	2015.933628	3121.806402	1565.989416	927.7088275
PI(16:0/18:1)	2356.094365	2652.149478	4963.304029	2496.811311	1489.389196	1375.63622	0	5562.304178	2089.162413	1977.000736	2550.412656	1884.760407	3026.709056	0	1504.614002	2039.793084	1387.514086	0	0	1043.585569	0	1041.730382	0	0	0	2247.532658	2786.964218	3417.652754	3957.85207	6163.965759	6783.869365	5804.181838	2778.364936	2772.275938	3991.59863	2017.315695	3040.066353	5379.921837	3986.73319	6381.883556	1900.446624	1491.907126	1054.107539	2793.862435	1942.146006	2455.237706	974.0873921	1587.206208	2151.026961
PI(16:0/18:2)	2363.463103	4481.863525	3356.252397	3666.894443	2965.005609	3333.928444	2984.294163	4846.206338	1447.4826	11325.9886	4448.745662	10524.22419	4511.275236	1018.357929	1255.708233	2868.246509	5001.641964	1035.560333	0	2025.191042	0	0	0	0	0	2679.221261	4204.116	2460.56246	3883.538968	6136.716066	4648.040864	6344.440267	3865.615676	12398.75489	10695.50429	2325.981631	7975.322521	5617.955561	2514.772115	15595.84247	8355.427493	1949.312079	2935.310363	2074.077872	3980.137166	1980.141399	0	997.6989686	1176.693088
PI(16:0/18:3)	302937.1589	167852.5027	173787.2134	564644.0836	260714.3561	229424.81	351340.9705	165187.9402	487761.3233	545896.5132	556625.0952	313387.221	267810.6484	281865.6661	258734.9061	273511.1486	361063.2035	21853.66836	22585.1705	18782.90043	49101.87872	43683.40086	31336.19692	12310.98009	36695.9939	123144.4801	674193.3624	313758.2247	622692.062	625523.7825	252443.0481	506594.7973	377264.4374	368368.9085	412518.0567	140754.2825	130375.5151	336702.0815	163616.93	428418.4958	264013.5444	631925.8104	395023.1867	213371.076	310064.3169	246434.2067	278430.435	55568.55243	218939.0604
PI(16:0/20:1)	0	0	1048.06903	0	0	0	0	0	0	0	0	0	0	0	0	0	0	0	0	0	0	0	0	0	0	0	0	0	0	0	0	2082.126171	0	0	1033.767257	0	0	0	0	0	0	1056.173701	0	0	0	0	0	0	0
PI(16:0/20:2)	0	0	1033.635417	0	0	0	0	1047.557597	0	0	0	0	1565.933582	0	0	0	996.3668798	0	0	0	0	0	0	0	1564.681418	0	0	0	0	0	1573.37857	0	0	0	0	0	1557.716792	0	1042.597516	0	0	0	0	0	0	0	1045.26102	0	0
PI(16:0/20:3)	0	0	0	1508.693682	1045.183909	0	0	0	0	424.0539146	0	0	2092.540845	2071.08557	1024.813186	0	0	0	0	0	0	858.9289561	0	0	0	436.3115023	498.3719184	246.7063498	512.4130067	0	466.6694599	855.0156139	365.7037747	0	247.5780445	0	0	0	0	337.0264948	348.9224108	1587.181777	0	0	1430.154156	0	317.3268044	0	0
PI(16:0/20:4)	5717.498567	11660.48549	8487.4742	6378.74598	2753.590981	7374.486382	1979.578858	5113.340995	8116.108452	6266.115079	6231.370771	5385.99381	6297.222404	2906.656193	0	4725.885558	2808.1083	0	0	0	0	0	0	0	0	1643.055557	4383.663236	2164.485121	9762.947733	30987.68058	3522.119138	9384.442165	4558.032892	4980.12065	4232.236903	3169.792377	6420.756016	4879.73206	4490.894241	19954.93933	3119.657481	4848.357514	1675.189727	0	2992.875213	2973.030872	0	0	2271.169996
PI(16:0/20:5)	0	0	0	0	0	0	1055.679847	0	0	0	0	0	0	0	0	1057.26278	0	0	0	0	0	0	0	1456.683997	0	0	0	0	0	0	0	0	942.7893236	0	0	0	0	0	0	0	0	0	1533.069261	0	0	0	0	0	0
PI(16:0/22:4)	0	0	0	0	0	1543.067062	0	0	0	2086.760038	1023.429667	0	1559.491059	0	0	1418.784317	0	0	0	0	0	0	0	0	0	0	1025.982434	0	0	0	1757.202891	0	1198.217384	0	0	0	0	0	0	0	0	0	0	0	0	0	0	0	0
PI(16:0/22:5)	0	1499.325244	0	0	1042.074461	0	2068.674831	0	0	1454.858563	1992.999455	0	0	0	0	0	0	0	1052.365408	0	0	0	0	0	0	0	0	0	1553.78329	796.7795329	1573.427731	1235.20257	0	1461.39501	0	0	0	1042.969395	1554.208626	3473.982983	0	0	957.2014652	0	1049.056401	0	0	0	0
PI(16:0/22:6)	1565.016576	1350.099732	1594.802643	1541.155554	1042.074461	0	0	0	0	983.2988104	1042.891889	0	0	0	0	1001.462524	0	0	0	0	0	0	0	0	0	0	0	0	1564.942216	0	1573.538557	0	0	0	0	0	951.3367757	0	0	1047.900692	0	0	950.0581687	0	1006.107629	1050.241351	0	0	933.7645403
PI(18:0/14:0)	0	836.1164864	0	178.6259849	162.0896196	0	0	0	0	0	0	459.9971857	0	0	0	250.8473536	203.1119844	0	0	0	0	0	0	0	0	0	0	340.0011339	0	0	0	0	0	0	0	0	352.6395258	215.7687502	0	217.4836297	0	483.2455507	1042.852189	0	0	201.0038554	0	0	323.176433
PI(18:0/16:1)	0	0	0	0	0	0	997.096881	1570.341156	0	1037.91664	0	2345.689956	0	1025.570951	0	0	0	0	0	0	0	0	0	0	0	1046.360174	1027.371416	1571.050959	0	7229.666107	1527.682191	3834.596419	1765.607196	2907.283069	976.4766889	0	1560.567839	1576.260251	2798.319365	1023.338283	0	2142.146578	1573.231136	0	1406.152469	0	0	0	0
PI(18:0/18:0)	1033.4258	2964.508398	6959.974835	1547.853203	1758.043256	4879.955996	2063.972677	4174.503546	6616.324476	7171.854923	2723.173353	2036.339195	6694.042285	2884.332919	5256.344674	8189.269044	4432.656219	0	0	1020.164323	0	0	2054.581916	0	0	0	2324.719543	12571.72828	6270.124404	2983.730403	3553.275957	9716.382749	10081.9139	7510.547537	1453.072811	2066.712207	0	10725.55888	2541.737324	2800.583465	2603.389524	4068.984849	3624.663626	2086.671668	778.0730751	2028.558652	0	1505.535415	833.1645219
PI(18:0/18:1)	5174.020663	2085.137253	2804.560387	1513.950099	1267.249179	1839.255523	2988.581922	3521.996038	2204.962184	1176.133876	4227.71708	0	1509.035881	2149.031806	2237.806531	708.224375	4580.187692	0	0	0	0	1015.08473	0	0	0	1929.938819	1368.975161	1744.706213	3179.398286	12049.72047	3440.507651	5720.857133	2902.599005	4378.701728	4625.27503	1330.257212	4344.648865	5850.974631	2463.249746	1981.835133	4607.962647	1032.828408	2083.725746	1526.595696	2181.49881	2039.187342	1172.711546	0	4541.917868
PI(18:0/18:2)	18004.38788	12872.2374	10602.60544	2643.031758	7029.877401	8637.797739	4456.968767	15029.18889	7513.080016	5098.281733	3267.520432	3847.439021	5183.829855	17757.69309	1347.908698	4478.074353	6345.113248	0	0	2569.386967	2034.577048	0	1025.496148	0	2928.901698	9361.901016	6168.732099	9448.356821	6767.019717	12708.50025	6251.955503	4762.66233	8292.568075	14853.57445	4310.638383	3350.822135	2514.895214	16963.77792	5727.494928	11211.9736	8505.108413	0	2223.201026	1597.672549	6723.048182	6115.352061	3932.039093	5536.179866	2562.514295
PI(18:0/18:3)	0	0	0	1044.396854	1044.285473	999.9492283	0	0	1033.658187	0	0	0	0	2006.461354	0	1021.173564	0	0	0	1044.838837	0	0	0	0	0	0	0	0	0	5465.174162	0	0	0	0	0	0	0	1569.085415	0	1498.58764	0	0	0	1492.51579	1006.094856	0	0	1543.565718	0
PI(18:0/20:0)	257031.3903	554771.7318	515438.0071	323544.2417	654921.2157	621205.5042	376130.7074	617113.6924	556560.0287	423952.488	405838.8005	437867.9508	545276.7867	264629.272	452890.6306	533401.1625	309010.5627	6483.202158	11080.93849	11136.46721	12168.31427	12222.9067	22961.98585	17008.50372	30772.94635	53499.00871	592995.4211	440899.9589	227583.1796	403064.6942	440545.8388	323932.5383	252175.5989	498492.7178	221128.0966	200658.7853	74936.40757	397055.4747	199090.636	207241.9065	277635.6401	694860.414	309742.7697	183190.7474	453015.6392	370202.3349	188205.3846	53646.98035	223559.9906
PI(18:0/20:1)	0	0	1046.794858	0	0	0	0	1500.326193	2082.515001	0	602.8799941	0	0	0	0	0	0	0	974.6800959	0	0	0	0	0	0	0	0	0	970.0484889	0	0	0	0	0	1400.614104	0	947.8728942	0	0	0	0	0	0	0	0	0	0	0	0
PI(18:0/20:2)	0	0	1054.056133	0	0	0	0	0	0	0	0	0	0	0	0	0	0	0	0	0	0	0	0	0	0	0	3091.404868	0	0	2294.976343	1040.274198	1546.383654	0	0	1554.21767	0	0	0	2715.369592	1444.972839	0	0	958.9578802	0	0	2064.128676	0	0	0
PI(18:0/20:3)	5203.859776	2578.201172	7252.649187	0	2074.727854	1535.028891	0	1114.997984	1222.53648	2697.156704	4664.151908	762.4319409	0	934.9907145	0	2429.727975	1464.519018	0	1552.255393	0	0	1046.55831	0	1562.205018	0	3734.670183	9945.302992	5707.525311	10165.85135	10556.20011	3349.585552	7777.032222	3229.444861	6185.638946	18175.26411	4042.058606	7137.431219	7060.612352	6078.124985	3613.181068	3060.544346	0	0	978.8860869	3868.997273	4163.297295	2310.105615	5575.463092	2087.294839
PI(18:0/20:4)	0	2245.441613	0	0	0	0	0	0	0	0	0	0	0	0	0	0	737.0837048	1027.510304	1687.550028	1555.454899	0	1052.347547	1053.857717	1567.571678	1421.102335	21723.45288	23374.21928	38390.66195	30480.96671	128516.4078	40783.18395	15683.623	15470.37027	34276.99095	27990.988	16608.61286	58498.97206	149838.4402	17374.46397	66703.03992	17451.73775	3753.213732	4571.646855	1285.963036	12692.50312	4808.742719	3910.765196	1159.066762	10989.34721
PI(18:0/20:5)	0	0	0	406.7482078	173.5814158	0	248.3496281	923.9345451	0	0	0	0	291.6487617	0	341.1005653	0	0	0	0	0	0	0	0	0	0	0	0	207.0606905	0	0	0	0	0	0	0	0	237.5194369	0	0	0	0	212.1877311	0	0	0	212.4582963	0	0	0
PI(18:0/22:4)	0	0	1011.576006	0	0	0	0	1015.236493	0	798.069362	0	1526.601798	0	1026.539554	0	0	727.1633892	0	0	0	0	0	0	0	0	0	0	1040.689837	2594.011361	1571.589703	0	1885.734607	1033.68426	1541.435701	1042.043678	0	1530.97796	951.6674194	0	2419.89698	2603.724683	0	0	0	0	0	0	0	0
PI(18:0/22:5)	3641.469591	1001.48203	0	2088.108495	977.5217967	2319.328069	1873.32924	0	1502.406623	0	1563.24932	1043.564639	0	0	0	1044.414818	1549.056337	0	0	0	0	0	0	0	0	0	2088.963929	943.6010799	942.247613	2316.750876	0	1697.90431	2057.994786	2336.456087	1042.885613	0	1541.412098	1027.519089	1452.468635	1462.098723	0	0	0	0	1583.707733	1167.091371	996.6069255	0	0
PI(18:0/22:6)	0	3688.576225	1364.296047	0	2732.799107	1057.016077	0	0	0	1564.760636	2574.906534	0	4205.7207	0	0	0	0	0	0	0	0	0	0	0	0	0	0	0	0	1660.625005	2739.773775	5158.038645	1577.747529	1719.466837	1046.934262	0	2569.818614	1172.881634	1023.766793	0	1800.395495	0	1039.288135	1085.236592	1543.763545	0	0	0	1573.991586
PI(18:1/16:1)	1425.60781	742.3460237	0	0	1581.826519	1006.99632	0	2100.491224	1003.44814	3908.759648	3022.628091	1728.359619	0	0	0	1517.29698	1007.077728	1042.358003	0	0	0	0	0	0	0	0	2071.592442	1393.037443	1205.064759	0	634.7627833	2612.261455	1419.014866	1437.057521	0	948.0309591	1043.156062	0	3159.507687	2770.429155	1036.200986	1519.825492	1048.582761	0	1315.616705	0	0	0	0
PI(18:1/18:1)	0	1394.207495	0	4234.429191	0	0	0	0	0	2743.389221	0	4490.235866	1044.408498	0	0	1937.993788	1581.01492	0	0	0	0	3119.000716	0	1559.807955	2100.492248	4141.846661	1359.102128	3965.469269	2384.237169	4202.086952	2151.152379	4219.828796	2984.669358	2061.804315	3497.639032	3940.480808	6844.975693	4862.740039	3842.511478	3727.060685	0	1928.260003	0	0	931.1473478	1423.297899	0	0	2088.606186
PI(18:1/18:2)	3097.29823	1412.516772	0	1067.958017	0	1332.607469	0	1762.998931	1355.513883	1888.495134	0	0	1785.657953	1067.879093	2944.97245	946.8838345	0	0	0	1044.838837	1559.025589	1415.861178	1012.93611	0	1074.506179	3581.652648	3964.406881	7138.85008	2499.447011	5219.871738	2102.872132	5399.674936	5283.033992	1566.99507	3044.955385	2450.177748	3553.923469	2862.935854	2224.768091	3432.554453	3229.769702	0	3087.238033	1428.155329	3654.871762	946.527336	5033.761483	3494.756623	3878.502212
PI(18:1/18:3)	0	0	629.7231591	948.5515472	1049.499639	0	0	0	1576.959982	988.7353416	281.475311	0	0	0	0	0	0	0	314.888435	0	0	0	0	0	0	0	0	0	0	0	0	0	0	290.999916	0	0	0	249.7211413	0	0	0	624.6085885	0	0	250.431482	0	0	0	541.8784169
PI(18:1/20:1)	235.7821785	0	0	324.3372137	173.7570191	274.4476786	215.4421105	0	911.7770961	0	0	0	349.330239	0	0	0	0	0	0	0	0	222.063225	0	0	0	222.5683767	238.5884562	0	0	0	0	0	0	0	0	0	0	0	248.775136	0	0	0	0	0	0	0	181.255016	0	0
PI(18:1/20:2)	656.2438888	346.173338	0	669.3565272	326.2387664	508.9179207	0	0	169.3274089	467.7457865	300.3402607	169.3095145	253.7237947	0	0	162.4975426	1197.120118	0	795.4736284	0	0	0	0	1001.109809	0	0	0	0	938.0080425	370.00559	0	0	0	0	498.1501836	0	0	0	0	324.6667058	260.2297576	0	0	1048.098349	541.8682836	0	0	0	481.4923083
PI(18:1/20:3)	3158.694634	2349.876278	3123.606621	3865.522986	1789.682476	6326.765451	2372.519911	2955.881085	4080.1549	2429.49322	4692.602069	3804.799731	1553.75748	1892.613496	2141.968191	3308.106801	2161.080368	739.3855985	1170.887187	1439.213811	948.7611037	1038.735172	1114.825366	1163.981746	1117.011944	2466.741076	6920.958178	4056.328916	4508.497381	3071.986395	4061.293435	3539.472627	2964.448195	1965.969294	2247.632504	2999.630608	3116.653362	3812.452011	2370.421048	3862.565592	4361.685197	3015.320989	3932.154892	1416.739578	2392.341879	5675.841327	2749.342989	1339.487333	1986.449616
PI(18:1/20:4)	3503.00822	2469.27179	2289.166983	1918.939236	527.9238874	2279.512165	3301.58783	0	641.9421755	2095.072394	2308.137986	1864.064396	1034.579887	393.2233537	1862.313223	2246.750651	2582.003645	1053.254816	0	1047.002365	0	1458.308143	4201.498657	1448.137206	2883.162611	2136.056545	7312.127281	3501.865978	7832.808904	7853.821504	3265.374597	7691.890859	2037.972099	4721.062081	3216.336273	3416.966993	3795.935019	6876.922264	1828.165441	7350.465851	5404.144946	4450.312357	3052.061115	2226.722642	1504.757428	3250.700002	3048.480003	1689.022679	2814.164728
PI(18:1/20:5)	247.3390446	159.5488254	155.1154863	0	184.3188463	0	0	309.9942228	186.3613602	350.0271301	166.5115624	392.1131101	313.1857177	311.876732	331.4676986	0	257.3357088	0	0	0	226.7235397	0	0	0	638.3635398	0	248.3857479	163.9156698	0	0	0	0	285.8317701	179.7975342	0	0	214.2669964	0	0	204.5564603	0	170.6253858	496.2914667	238.8636073	0	0	217.4528703	163.5889881	282.8298223
PI(18:1/22:4)	1013.628297	1007.111362	2018.699857	1007.129323	0	988.1012086	0	1483.158905	0	1525.773407	1547.834884	0	0	0	0	0	0	0	0	0	0	0	0	0	0	937.5699638	1098.721763	2598.017605	0	1512.494486	1013.505005	0	1033.844105	1028.823664	0	0	0	0	942.4131616	1925.149539	0	587.0492111	0	0	0	0	1560.350096	0	2453.668683
PI(18:1/22:5)	833.6374898	1372.015838	1558.369844	1602.743344	1777.810374	1621.859722	1482.378711	3114.955842	1153.612632	1205.277098	650.8557299	1753.946316	2286.056587	1617.197199	1910.39861	1492.305929	0	0	0	0	0	0	0	0	0	0	2338.137804	1174.249195	720.8391957	947.0275232	1816.992771	821.7038699	1356.801272	1554.485353	999.3191677	350.5963066	0	2179.040066	363.5255155	1941.975462	875.5708474	478.7625634	616.4428284	0	1616.00628	1141.70462	852.102675	0	757.4811962
PI(18:1/22:6)	2663.953515	2697.05148	4021.247559	3552.710511	2220.824698	3175.151062	1851.005847	8021.372787	2282.660622	2836.931693	1454.175673	2947.126159	2603.266787	2679.724559	1413.448677	1300.081532	1851.0865	0	0	0	0	0	0	0	0	0	1641.715704	1666.012469	2298.058199	821.0641027	2551.384519	0	672.0819839	3381.941321	1564.964223	0	1940.415569	2569.847334	1380.735487	1160.852675	1366.211001	1721.624915	2603.865038	0	2233.485597	2366.057543	1716.265133	553.3087081	0
PI(18:2/16:1)	314586.3759	252765.5291	349756.7236	258334.6531	242985.5008	297567.7007	273709.4442	372650.3649	244517.3798	238135.4314	242239.7601	271883.0355	353198.7548	262207.0313	304952.7538	287575.331	258764.8787	7418.199085	8728.127806	9842.088974	13341.05942	13819.10117	16798.88095	13055.49083	27994.73376	44185.65819	280733.055	228126.9351	342750.9736	97023.56485	243871.9211	221823.2592	296886.4778	205505.2467	132671.8839	37572.33642	122524.6266	269751.6891	78108.15622	222980.9022	118854.0577	213906.2663	242163.8316	228639.9138	203668.7331	111565.6551	115863.9255	39999.1233	115309.5251
PI(18:2/18:2)	9602.95914	12375.65809	14862.22058	7286.318404	4768.440517	8521.571225	3780.578689	13938.06142	2836.333186	7263.844599	7544.681467	6550.796294	5560.206313	4435.510628	7033.875814	3516.343134	7484.422955	1031.18899	1012.535921	0	3584.683257	1580.64137	1191.69973	0	2058.555921	2957.287798	3382.630951	5327.32243	7989.856538	3667.685887	4458.287913	8025.404724	8947.890884	7654.996063	8282.840378	1534.050839	1308.18415	10229.12581	3302.16431	16505.56007	953.0265032	9162.543775	15520.76525	909.4176264	3682.442333	3498.642307	4288.321833	481.9841758	2456.561699
PI(18:2/18:3)	0	344.9905516	0	487.2791435	0	0	237.4711067	328.8654794	220.9322301	0	0	0	0	0	316.1451278	0	0	0	0	0	0	0	0	0	0	0	0	0	0	0	367.0516069	0	0	170.0723344	438.9420829	0	0	0	0	0	0	437.2689381	228.3718549	0	0	0	192.4777459	0	0
PI(18:2/20:1)	0	0	277.2941406	0	0	0	0	146.3359486	0	178.8518769	0	0	0	326.8762707	0	661.6343976	496.0507873	0	0	0	185.9129729	0	0	0	0	0	0	0	0	0	0	283.2253159	0	0	205.2424932	422.9976584	0	195.2418717	0	0	0	0	180.4904775	766.8594477	170.4257357	0	0	0	0
PI(18:2/20:2)	0	473.4841997	288.8225978	0	0	0	0	0	243.5938613	323.6261344	0	360.4580987	233.4073907	296.5566574	0	0	0	0	0	0	0	0	0	272.694172	0	0	311.1328128	0	0	0	190.5281823	289.8558566	0	253.2587453	0	161.3880538	0	0	0	0	246.7497428	0	205.4578023	0	229.927381	0	158.4649504	0	0
PI(18:2/20:3)	1504.715657	1413.089393	1192.193729	1433.897232	0	1663.973283	1661.955096	1744.157927	0	2199.693771	1200.818876	931.4354666	1111.434669	666.8236643	0	1566.52167	0	505.8243405	692.1834884	1189.03459	471.0512927	1181.997018	821.3068213	813.4292328	1374.57248	0	2463.585503	0	654.5399221	2288.014537	826.7985331	0	1282.542452	2226.365838	1150.891178	0	1123.664766	1658.293268	1039.051382	0	1406.930981	5384.751634	1862.505934	2141.350627	0	2352.075522	1525.676878	715.8022458	1809.527
PI(18:2/20:4)	15912.89454	24214.12147	28931.01776	20350.06866	22734.64806	22474.24449	22416.00353	28621.96949	24791.38197	14036.79901	16345.12284	19390.0336	12850.82757	23794.91033	10681.66356	11634.69492	15281.44748	0	0	567.4888546	0	0	1124.773541	2156.922882	2950.501889	4146.757155	15952.23307	27535.21072	80287.83751	13124.49486	21514.03033	6020.806968	26693.08938	22435.42829	9590.093181	4774.191441	8626.351012	13763.83996	3353.055884	25554.73044	11602.82568	11080.54811	17539.19528	9069.141778	17652.09083	4868.189644	10365.01737	4467.743686	15331.34062
PI(18:2/20:5)	249.7417205	503.4307215	503.4874687	748.2424563	359.4116195	408.3864714	504.895153	503.3408985	0	231.480646	0	711.9469426	0	180.3602322	953.5449612	0	465.7540985	0	0	388.4780882	0	0	0	0	0	1691.537104	0	0	0	0	0	0	0	0	0	0	0	0	0	0	0	1736.047726	0	0	0	0	0	502.2659491	0
PI(18:2/22:4)	2222.020662	1479.33436	2373.851871	763.8652761	1129.164535	919.2499695	2824.995247	1148.3569	1241.474162	581.7679854	0	2767.38572	1001.789164	2430.254234	0	0	3070.802389	0	0	0	0	0	0	0	0	0	0	0	578.5082317	0	579.5492095	572.9951506	0	0	0	0	0	0	0	0	0	1745.005886	1062.038583	0	564.2945616	0	0	0	0
PI(18:2/22:5)	829.5228271	1662.066295	2211.919513	1542.691766	0	436.496532	1746.706118	1010.12716	1675.042744	1113.780622	482.9206206	1308.785646	1492.66434	958.0983526	1587.973424	3152.000546	1230.540107	0	0	0	0	0	0	0	0	0	0	439.73228	0	2772.171818	668.4527612	393.1371146	1609.731393	1048.066545	589.4625035	841.0842926	0	1309.171895	762.176836	841.6138658	0	2578.709943	1776.375298	1243.110537	804.7438977	482.9027538	716.2411033	0	610.9129581
PI(18:2/22:6)	3120.834776	5416.625002	3001.210286	2926.391712	2253.571204	2019.142739	2406.928343	4534.66684	5550.101855	1797.02742	1814.97328	1723.572593	3685.535322	1649.324008	7450.749542	0	2307.837051	0	0	0	0	0	0	0	0	0	537.4389294	1501.89351	4392.211138	1366.046934	1604.228999	835.1680666	2072.092979	1364.475446	2320.805991	0	0	1099.763059	848.7998394	746.8822789	2198.308335	2616.087883	1188.456226	0	860.0516818	0	0	827.8553991	1420.044497
PI(20:0/16:1)	3600.947523	6298.399253	9214.81291	7585.910399	8697.829399	13527.62573	8062.376032	11690.02659	16239.84758	3863.825713	7930.442994	8920.051428	14792.3891	6791.775657	8679.678414	8015.006571	5166.74366	0	537.0589926	1100.1126	0	785.8272737	0	549.728482	0	0	3910.924775	4020.310468	3275.569954	4109.961203	3577.031561	8065.910982	4996.101466	5007.290053	3237.266768	1861.663699	1401.932153	5470.416863	3550.997366	629.6605873	1953.535137	3402.472515	3729.641861	2064.461436	2849.252077	6167.860047	3077.392176	559.423404	1341.473722
PI(20:0/18:1)	55597.18422	66606.3544	80237.43763	71931.85196	61647.74612	96308.33545	69002.00938	102755.2569	98263.00315	39528.82604	64524.85716	61415.65217	122979.2478	45026.14389	66070.33641	86044.93081	49844.84251	804.8105869	1092.026202	259.767357	801.3981227	1353.802039	4855.586774	1622.090148	10409.9955	2601.574589	62287.4666	57706.24756	15955.15601	35643.95009	43261.58608	53692.06571	23671.1372	35215.92036	28466.31202	14799.17635	7470.085098	47041.0017	22907.54624	24830.84841	37609.22312	37690.88718	33389.3603	32277.51204	63093.25907	23765.6167	34178.27638	8642.750216	17035.20382
PI(20:0/18:2)	27572.11799	20813.89973	21607.24263	21485.56571	12532.31421	34965.43753	18554.93047	22719.71692	17857.61065	16362.16278	16997.53218	18432.70682	32291.46032	16538.88412	22912.18965	32260.1317	14515.16338	536.2832699	260.4824253	1339.613809	1074.069369	1868.20115	1048.489074	224.6772944	2146.308075	1325.58801	3921.533609	8367.291097	6889.702528	9098.087568	10524.26317	26840.55549	9815.645267	5472.125219	6943.650947	4607.822064	5046.03844	12607.37995	6691.406243	7980.784595	14329.87373	7650.546363	9580.197596	6556.734541	5083.855175	3618.924824	7948.39976	1956.88171	5262.976297
PI(20:0/18:3)	0	0	0	1059.888027	0	0	941.5552141	0	0	1242.820114	2290.442225	0	0	0	1330.347981	874.1348198	979.4531525	0	0	0	0	0	0	0	0	0	537.4411849	0	858.8060783	0	0	859.4318961	0	0	0	0	0	0	583.6412066	0	0	602.4268461	0	0	0	0	0	586.9678414	0
PI(20:0/20:1)	4101.963263	8602.555463	0	4716.301497	4153.952567	2716.503807	5889.286905	2852.167185	10617.78198	0	1955.78232	1932.666228	6522.415389	791.8391119	4172.945954	1383.469924	1053.201459	0	0	0	0	586.399552	0	1132.233506	897.3226773	0	2168.833998	5091.211006	0	2044.165221	2474.234926	2230.713861	0	815.5357023	0	2872.220439	0	4398.450248	0	0	4412.333668	3479.33461	2021.161574	0	2286.438843	2432.606628	911.0223697	0	926.5344389
PI(20:0/20:2)	4712.668408	2043.979929	3377.644866	2429.470933	1378.333775	2596.566404	3131.032056	868.1801407	1827.722928	2711.542544	3203.632148	919.2499248	1731.856839	2724.50534	0	3248.14867	2232.405157	0	0	0	0	0	544.9278467	0	0	0	2131.357312	2772.067763	1134.135644	0	0	1918.075434	942.5465544	0	961.2998944	0	917.9516131	829.5748794	0	2399.219887	983.7172516	3185.586861	864.6774154	2317.4348	2504.939582	0	860.4722509	0	0
PI(20:0/20:3)	791.741976	0	1267.208812	2306.279357	1733.494778	1674.628815	1461.896645	3888.151326	2453.461976	868.1623247	1684.350511	4177.182254	4005.546236	1011.345705	1717.636303	2558.689497	1450.560759	825.404482	0	0	985.1951351	0	879.1619626	544.9499365	0	0	1347.853851	1182.827612	1985.461043	1466.249541	2143.302897	1412.983243	1620.183423	0	1422.068149	0	899.4538008	1947.992488	1347.055753	0	1895.445573	1638.96399	4535.738284	1798.912183	1157.061932	1842.023388	0	1236.176647	1778.578524
PI(20:0/20:4)	1755.783176	3319.954358	17944.98689	8172.787218	11809.79528	9507.542976	8232.70717	8848.929154	4600.406045	5567.561129	5321.359394	2836.576385	12117.10094	8787.050123	7361.785099	12587.84987	8229.087935	0	702.9472619	0	0	0	605.7907239	0	0	1133.973434	5689.01254	2505.442677	5858.068392	6074.853972	3833.386769	10552.91268	5890.939615	6938.388377	1853.096401	1995.11057	0	3509.620092	1530.95387	2778.807383	2014.969832	6683.6761	2702.603503	2018.5491	3170.886398	1513.321583	1868.676136	736.1361232	1338.772146
PI(20:0/20:5)	0	0	0	1185.471378	0	1533.539454	0	0	0	0	0	1563.371133	0	0	886.6853606	0	0	0	0	0	542.6649987	0	0	0	0	0	0	0	0	593.6919855	0	0	551.0482005	0	0	0	0	620.0723859	0	0	0	605.1754861	0	0	961.1471876	0	0	0	0
PI(20:0/22:5)	0	0	0	0	0	0	0	0	564.2703453	0	0	0	0	0	0	0	581.8471847	0	0	0	0	0	0	0	0	0	0	0	0	815.2676385	1059.60079	835.0053244	0	0	0	0	0	0	0	0	0	253.0307547	0	0	1111.318619	0	0	0	553.9713486
PI(20:0/22:6)	0	1496.758025	0	0	1762.594351	1031.989373	0	1713.320896	1166.956763	0	0	0	1517.80595	0	0	2382.066225	0	0	0	0	0	0	546.7994225	0	0	0	0	1518.227278	0	1015.385415	0	969.8042443	0	0	0	0	0	0	0	0	1622.097537	625.5689602	606.7020704	0	0	0	0	0	0
PS(14:0/14:0)	0	0	0	0	0	0	0	865.2150155	0	0	0	588.0670898	0	0	0	0	0	0	0	0	0	0	0	0	0	0	0	0	0	0	0	0	0	578.6794814	0	0	0	0	0	0	0	892.8829169	1217.073988	0	0	0	0	0	586.9614775
PS(14:0/18:1)	497.3618751	490.2917497	0	0	0	0	0	497.2659369	0	729.4996289	497.1824752	257.935392	233.4956186	483.5449665	0	0	745.8742484	0	0	265.8617775	176.2351097	0	0	660.4994698	590.9401584	0	976.4860094	0	199.3004829	878.9481082	0	0	164.5208407	769.6452381	0	548.3115109	815.4265725	0	0	0	0	5146.862628	5146.615034	0	542.6457611	0	208.7712672	409.7999765	0
PS(14:0/18:2)	6673.998162	4065.201954	7565.423865	4145.885692	4360.434945	4934.524311	7262.015002	5528.185011	4336.434617	3416.189661	4614.656129	6145.337302	3636.549801	6076.451113	6953.105164	5205.671357	5501.451677	0	0	0	0	0	0	0	0	0	4881.439834	1418.826811	4607.563061	2065.721847	1418.182752	1667.069347	8067.010728	1705.860971	1689.709494	1416.62341	2009.168708	2356.973821	882.7594609	6253.97426	5943.02404	5146.845706	8174.026862	3028.47318	1765.705735	0	3230.590461	0	1572.792867
PS(14:0/18:3)	0	0	0	0	0	0	0	0	0	520.2983888	0	0	0	0	0	0	0	0	0	0	0	0	0	0	537.1941959	0	0	0	0	0	0	836.0453519	0	0	0	0	0	0	0	0	0	0	0	0	0	0	0	0	0
PS(14:0/20:1)	0	0	0	0	608.9315021	0	0	0	0	0	924.396531	0	0	0	0	0	0	0	0	0	0	0	0	0	0	0	0	0	0	0	0	0	0	0	0	0	0	0	0	1003.492116	0	0	0	0	0	0	0	0	0
PS(14:0/20:2)	574.6313982	589.7752967	551.2217576	0	0	0	0	0	0	0	0	0	830.9445921	0	0	0	0	0	0	0	0	0	589.8630214	0	0	0	0	0	0	0	0	0	0	0	0	0	0	0	0	573.7359205	0	0	293.358598	582.7655875	0	0	0	0	575.9514028
PS(14:0/20:3)	0	934.1905901	3502.235834	2355.471245	0	2047.956053	0	0	1007.111361	0	1005.929829	997.1956757	971.4912258	2509.262816	0	0	0	0	0	0	0	0	0	0	923.3855009	0	0	2067.864259	0	0	0	0	0	2061.82447	0	1543.492435	1088.265663	0	0	0	0	1177.438353	2626.471871	1564.083202	0	0	0	0	0
PS(14:0/20:4)	14183.05839	9047.158036	17721.23567	15077.4478	1705.55993	14136.96545	10557.93247	24215.01199	11156.0002	11135.15828	7785.965749	8881.441249	8144.59753	7376.701306	11051.03955	9958.09294	6845.999421	2070.864867	0	1513.373555	2248.632238	1041.648266	999.4863194	502.1574374	3502.725903	1039.031949	3014.109492	12628.94898	10194.75086	6109.941987	7177.986507	15501.66882	7964.168576	10769.03895	4124.544636	6707.32761	1553.143513	6088.909093	1402.592598	8975.572661	3949.837741	9384.755843	3655.970337	6502.305017	5926.825989	5959.61327	4375.999717	5042.904546	6377.09715
PS(14:0/20:5)	0	1002.683261	2954.489799	0	1537.835647	3501.034691	2308.46408	3131.580409	1044.159864	0	2537.993154	2048.493055	0	0	1596.379165	2562.390848	0	0	0	0	0	0	0	1015.933617	1505.817652	0	0	1566.865889	994.4016946	0	0	0	0	0	0	0	0	1041.353241	0	0	0	1051.398181	0	0	1511.884708	0	0	0	0
PS(14:0/22:4)	0	0	1959.474354	0	0	1426.73493	2020.13135	1342.751715	0	2632.775802	983.7276107	0	1542.958418	3091.147018	2020.645055	2047.740789	1526.322406	1546.01048	0	0	0	0	0	918.3288024	1014.997756	0	1516.054761	3616.168059	2949.327705	0	4116.352562	0	1732.958067	1031.088735	0	1514.723734	1526.441955	1999.828651	0	3592.178516	1030.930297	0	2611.777345	4122.479083	2570.730502	0	987.6250204	0	3998.017777
PS(14:0/22:5)	853.9443075	0	0	0	242.1939848	0	253.1410501	421.5926572	0	0	280.1409467	525.2218502	0	0	326.9980854	249.908535	0	195.3745419	0	0	0	368.3358618	0	0	0	0	156.6676768	438.5633705	0	245.4972448	254.1242976	142.6012755	0	0	0	0	0	140.2415273	0	0	285.978137	2989.751035	1967.896422	1011.960262	0	0	233.568699	0	246.7754179
PS(14:0/22:6)	0	1555.768544	1058.43218	2029.404759	1996.992608	2940.314475	1501.320172	1929.488463	1673.941826	0	0	1627.862591	1809.083893	1102.183429	1006.139428	0	2040.60334	0	0	0	0	0	0	0	0	0	0	2956.671979	1217.747555	0	971.5639714	0	1177.065857	2442.668499	0	1453.547929	0	0	1198.432245	0	962.6531191	0	0	0	2547.954753	0	0	0	0
PS(16:0/14:0)	582.3472448	0	0	0	0	0	0	0	0	0	0	571.8567394	0	0	0	881.6995588	0	0	0	0	0	0	0	0	0	0	0	0	0	0	0	0	0	0	0	0	0	0	0	0	0	0	1141.204626	574.5798387	0	0	0	0	586.2767628
PS(16:0/16:0)	1156.64773	881.5299355	4632.362781	1330.864476	1469.763151	2643.82853	2056.1767	4114.962198	1163.858694	1457.379913	2033.587538	2900.438397	1985.801901	881.6535946	1751.371412	1731.019088	0	0	0	0	0	0	0	0	0	579.7197384	1005.11613	0	771.8569881	1125.338572	0	518.791015	0	0	715.9422397	547.9971032	0	0	0	550.8013452	841.882711	1783.79117	3760.128547	608.4916717	745.9040522	0	0	580.7354659	587.6090764
PS(16:0/16:1)	0	574.9736367	1130.946612	0	0	588.0950258	0	0	0	582.4093361	0	0	588.1043447	0	0	0	1454.508757	0	584.0706482	0	0	0	0	0	0	0	591.7169444	0	589.1506211	1182.546677	0	0	1161.58999	0	0	0	890.1489488	0	0	0	0	1696.077851	0	0	587.0622166	0	0	0	0
PS(16:0/18:0)	8598.991972	23900.19327	36318.02306	17670.14532	12897.32833	10524.66686	18495.51225	54560.58341	12689.95787	16159.99451	13748.5772	8649.850937	30787.47887	5122.002568	19778.21258	19249.25432	7948.839265	1049.796843	5724.745291	1042.954168	2496.873008	513.5490256	4167.694006	2087.101494	7268.197454	6782.376178	14719.56317	10823.04487	21012.23043	4761.884841	13605.55148	35318.974	27780.3743	43700.37018	17418.71882	4682.97894	14073.11469	10582.71716	14891.65662	6252.090832	12462.31185	11247.21207	8263.040372	13056.32197	11451.06853	7936.713982	5878.274861	4462.770285	3363.702119
PS(16:0/18:1)	5955.27949	2020.672877	8182.563016	1583.843732	5468.453883	1227.818612	8246.427881	4481.263842	602.3043575	1562.561341	4049.997288	0	1426.985657	1911.998975	1971.246325	2630.643696	3774.229766	1052.731964	0	0	1054.126969	0	1023.15925	0	0	2061.662769	3397.214045	2263.426433	2606.553581	1397.242415	7063.33208	2692.458028	1897.008373	5678.915746	1356.420282	5012.709897	1044.56526	3532.34417	1543.645625	4832.542191	1755.412495	1728.30802	2374.877215	808.8051999	1478.457993	2508.20428	3525.761396	5003.478956	4215.459265
PS(16:0/18:2)	6014.437912	3208.293306	2677.641025	3160.634068	1985.183873	8854.505307	3515.805915	4530.382793	4077.797069	3455.113272	3377.88673	5922.871361	6475.557397	1497.077891	5069.686132	1474.959648	1695.404748	0	0	1077.896144	0	0	0	1009.839471	0	1438.737587	2797.693497	1395.4065	5014.831157	1564.428288	1425.364808	2735.738434	5902.735085	1488.688286	1055.771311	1543.898043	1264.3029	4790.420875	0	2073.948887	1034.39581	2054.82379	7705.526858	2603.017952	1794.930197	2988.402889	1003.17301	2370.949611	1567.103178
PS(16:0/18:3)	0	1170.39893	0	0	0	0	0	0	591.3684451	880.493831	580.7832798	591.3055743	0	0	0	1111.48572	0	0	0	0	0	0	987.8237349	0	0	0	879.5361796	0	0	0	0	533.2180762	0	0	0	0	0	0	0	0	0	0	1189.228653	0	0	0	0	0	0
PS(16:0/20:1)	0	1496.108263	2733.053794	0	1041.662624	897.3402177	1246.908038	997.1814516	1235.056489	1264.858198	4675.191292	0	3729.308396	1102.188091	0	1374.259917	999.2692742	0	0	0	0	0	0	0	0	0	0	1457.985789	1017.676336	0	835.6389148	916.2792384	1073.627797	969.9732468	0	0	0	0	0	0	1441.066299	0	484.1764475	1045.699484	1498.770002	0	0	0	0
PS(16:0/20:2)	0	0	0	0	0	1040.709011	0	1151.718795	0	1367.18615	1107.655433	0	0	0	0	0	0	0	0	0	0	0	0	0	0	0	0	0	0	0	0	1293.668029	0	0	0	962.4366231	1162.187613	0	0	0	0	0	0	2116.393097	0	0	0	0	0
PS(16:0/20:3)	0	1123.211068	3633.00702	0	1992.464673	2866.112313	1570.820968	0	0	1692.832604	2389.303964	1567.235719	2324.6654	1026.023786	0	2598.737496	1580.904947	0	0	1040.945694	0	0	0	0	0	0	0	1970.565296	801.7312195	1043.816503	1546.218203	942.920893	1041.584215	1034.726234	1565.013424	0	1452.681066	0	0	0	0	0	1016.154623	0	0	0	1568.504559	0	2001.116335
PS(16:0/20:4)	12680.68917	5936.766471	25609.74489	9382.582946	11783.61673	23359.8521	8332.459141	22142.79152	9868.248688	28405.12767	17912.53192	14972.11671	12564.07537	7922.472233	17529.58109	20404.17492	8094.409155	2083.904061	987.5520154	1009.240446	1035.540804	500.8312636	492.4764174	1038.99263	2150.88688	1558.140611	9367.539859	7835.263791	10001.64941	3934.963685	12969.32688	11717.03708	12188.42176	12285.40061	6626.055362	2670.573654	1531.580521	7020.667865	2991.665785	1744.881217	1120.600298	14311.94844	9586.508323	3912.230577	7860.168923	3980.391152	3781.030613	5010.578633	6875.038006
PS(16:0/20:5)	998.2153294	1519.581058	2054.4047	2069.971718	0	1562.480046	0	2316.913673	0	1584.910433	797.7996655	4139.273929	3633.875301	1516.884951	1544.114521	2184.99332	1033.635461	0	1561.513564	0	0	0	0	0	0	1047.339299	0	1437.155094	1049.547316	2089.000888	1941.194769	0	1564.037974	1534.378064	2028.492316	0	0	2061.953256	0	0	0	1591.136702	1046.050829	1046.171042	1497.249419	1003.07574	0	0	1532.359841
PS(16:0/22:4)	1196.115167	0	2546.411062	1021.191592	1211.970909	1519.419479	0	821.9483288	999.3523053	1098.277748	1648.376021	1652.29187	0	1085.87979	1009.884784	0	0	0	0	0	0	0	1054.867027	0	1813.296833	0	0	0	0	822.0873318	902.8635991	1099.086702	982.0429537	2969.155699	0	1020.585033	1009.313844	1195.036584	0	0	0	4169.136619	3639.42667	2220.99848	1126.208865	815.4605026	0	0	0
PS(16:0/22:5)	0	1034.468217	1901.309442	0	998.6051528	1874.093789	1005.231343	1871.213583	996.6848396	3139.849511	0	0	1384.813422	0	1804.99671	969.6083862	718.5978986	0	0	0	0	0	1039.440702	1039.452181	936.2708006	1007.380365	1452.945296	3117.543195	0	832.1528579	1525.905244	2598.282674	2512.13396	5205.818143	1602.895166	1512.190213	1016.896346	2082.956139	0	2078.732817	0	3632.013607	2574.939188	4167.800049	0	0	0	1931.666042	1529.183785
PS(16:0/22:6)	0	0	3992.952267	1494.031842	3552.542373	1818.167176	1502.385091	1000.167085	0	1212.084472	0	1557.054097	1814.562125	998.5391263	2370.919059	3998.908783	1910.531009	1017.457623	0	0	0	0	0	0	0	0	0	0	0	0	0	0	0	0	0	0	0	1270.570448	0	0	0	1543.196747	2610.977602	1553.701872	1017.029399	1019.929237	0	0	0
PS(18:0/14:0)	0	0	1211.969385	0	1006.996319	0	0	2299.367373	1509.912086	0	2021.033937	0	0	0	0	0	0	0	0	0	0	0	0	0	0	0	2016.298567	0	0	3027.890146	0	0	2525.510723	2556.519629	0	0	0	3769.073521	1511.257537	987.5765758	2575.475382	0	0	0	0	979.050645	0	0	0
PS(18:0/16:1)	1539.039879	2551.799162	2033.37976	2507.39276	1801.196688	4375.075564	0	2952.785435	0	0	5086.728099	2835.86723	1017.05869	2548.354472	2559.203326	1670.551262	2051.203223	0	0	0	0	0	2543.531638	0	940.1305141	2610.444363	4558.576659	8248.045968	2084.036618	5228.339718	2582.240188	5229.238929	2525.7086	7741.663924	2543.534615	2566.412528	1035.55881	2206.272607	3544.031223	1946.602234	0	3591.579741	0	1045.212132	2131.475254	4926.81163	1524.981875	0	0
PS(18:0/18:0)	211526.6347	267395.8636	651397.3233	230640.8893	699785.3233	485619.5959	294393.0268	562849.3273	650151.2119	527040.9586	670206.4914	336867.2116	546342.3181	243195.5559	453210.7343	548380.4298	171813.6757	51676.69627	56148.2029	31028.24148	72435.9371	32949.46173	157453.6208	33161.42255	77746.56676	84376.98555	668098.6556	804198.3252	191407.383	437857.4507	842107.4247	443101.2045	264203.1505	1001730.712	270668.9592	478780.3656	63972.04408	805046.3289	477882.2316	233884.6811	287910.6513	619446.2363	205354.6827	276165.3107	530993.509	933936.7201	363073.6711	205248.8412	269360.0437
PS(18:0/18:1)	45027.26432	41854.47406	81723.68945	69383.04297	83307.81837	89669.90152	57063.21884	99087.81214	104782.7245	65794.60044	127142.2817	62958.8831	73761.62103	47422.59507	85936.08716	97309.76285	23151.99156	10375.80733	3460.972545	8795.691799	12193.76013	16547.59578	38260.35661	9294.490391	29998.92824	10849.60756	71454.82092	104270.7971	22787.95354	55967.12666	101480.626	67572.7356	35477.64356	115879.5187	45977.79848	65899.4618	10419.08495	92471.23216	50929.63897	37138.76941	45732.04498	45411.54087	17468.48176	42433.83616	78160.00415	83322.20293	54855.73729	37014.43377	40732.46144
PS(18:0/18:2)	10501.1791	7328.305335	18641.67771	8268.856838	10032.46721	18555.88174	11422.29482	20881.67411	15474.71117	24096.11187	10661.69011	13399.7875	25811.74343	14983.94303	11169.26385	28059.66261	15509.65057	948.0376035	1035.366116	1022.226771	5658.767943	1552.270755	3084.219848	1039.964417	4626.126535	2584.465696	9325.619046	19003.37705	15177.34635	11869.57885	10113.08812	20824.79047	6877.466663	14494.39555	14904.08741	2585.614305	2472.009217	19218.01239	7292.338453	18832.88846	9844.829819	10758.59297	8410.249451	11777.7491	7076.720852	9595.450444	8169.800938	1518.536219	8907.277513
PS(18:0/18:3)	647.5726519	627.186679	826.2153547	1876.121055	1085.176441	1648.430195	1078.713104	1171.859566	854.7456856	1143.441115	1067.347434	771.7589714	1812.907095	768.2094601	1020.544888	1198.881875	539.7352896	1204.184483	1027.574004	1660.257225	596.8471403	1776.835474	790.7107847	1525.897714	1124.276652	1117.925145	1365.188302	1326.007971	1823.830166	1498.650744	1091.570915	308.9910674	2062.041274	1827.247831	1184.819471	835.3379101	1916.669197	1223.235546	2401.02422	1796.971573	1619.576754	653.3801851	2372.130284	892.78552	1453.944305	1094.303411	1603.582962	911.5607248	1600.990736
PS(18:0/20:0)	0	383.9792062	0	0	1827.633138	1442.674903	320.4350324	1760.153065	869.2681323	0	0	0	672.0879134	1078.242764	1248.219724	420.8846154	1306.068068	1319.99953	873.7589944	1156.607276	882.4713559	4364.566621	3066.262337	1460.076608	3493.854318	7413.352365	47439.52149	33244.81466	19826.54456	93828.97534	45646.01208	22261.5238	61711.2088	40000.18334	17980.71748	25474.13248	15957.2388	35189.8662	14761.99488	77701.54705	22375.11057	61542.06533	28475.12683	12829.08389	18050.89356	20231.59172	18065.39738	8695.202377	17917.62429
PS(18:0/20:1)	1565.510434	3129.308903	3647.0068	5177.068507	3128.184158	2086.573064	3132.082099	4174.166716	8852.23969	5218.460307	5689.287168	1566.849975	4173.647662	2088.716106	3129.008739	7243.508274	0	0	0	0	0	0	0	0	921.9244461	1039.989034	2106.105402	3499.613682	2606.214435	1017.393448	7271.08743	3649.595112	2084.230788	3115.505744	3130.165398	2080.161115	0	2083.852223	2084.922824	1038.896588	0	2092.840407	2093.189397	5751.381246	1042.075758	2075.012876	0	2594.037293	2562.618432
PS(18:0/20:2)	1044.299775	1009.984599	3630.777145	0	0	2193.646168	0	2083.643776	0	6253.631407	5425.629296	0	5209.031636	1565.639855	0	3644.167642	1046.295015	0	0	0	0	0	0	1559.651422	0	0	1541.110492	1570.323962	0	2074.17077	1559.340174	3623.908676	0	1925.491945	0	0	0	3588.971473	2085.632337	2028.66809	0	475.2731435	2087.464963	2093.036281	1545.504558	0	1033.230225	0	5173.687429
PS(18:0/20:3)	742599.1197	1032425.624	573095.8678	1265832.727	825773.4037	1123296.015	946204.2342	942489.9942	1023169.884	934103.0801	1171419.093	810985.7108	1000667.963	838337.9818	647067.7345	786623.7767	910047.1098	87645.92627	104918.5908	131339.5612	162016.831	144230.3228	188253.5779	178589.7486	154248.0934	172607.6294	811725.0292	451222.3329	448560.6903	387790.8054	242493.9183	313133.5409	516274.116	459391.7637	264605.2569	207624.9357	311669.1291	325627.6872	383868.5168	233010.4117	268634.2577	537797.1782	549292.9163	256775.6436	330341.514	380192.7839	242782.4124	227110.4072	531555.2108
PS(18:0/20:4)	20757.79807	22685.7173	52831.24274	18051.16241	15844.90658	34551.08849	19106.95449	35461.33887	19395.68519	63591.67833	19055.81657	21700.97466	22837.64647	15715.91577	17048.3383	46903.5908	19138.21877	0	0	1563.598641	0	2086.019406	3646.522158	4686.447458	3075.108083	5742.477713	11369.28868	25459.81523	14128.98897	11962.02994	12967.71848	31061.59511	9736.48367	19778.3145	9900.707215	5791.254607	5286.106969	15100.98052	10425.02368	12857.00475	4702.01474	10872.70283	23026.8014	13357.85621	10367.68177	7492.96951	2608.121131	9915.608695	10429.63458
PS(18:0/20:5)	3363.733559	0	0	1229.685298	1175.036826	1828.471231	764.2999989	1063.951463	946.5103612	0	635.27438	0	0	0	0	0	867.6886951	0	930.2667378	0	0	1290.773562	0	1884.017009	1248.150278	0	782.1680973	2590.24586	1715.048622	1618.034704	3204.940749	1583.495328	1551.260009	0	1019.808331	1232.245637	0	949.6240873	1880.033073	1191.07966	914.4456919	5096.186956	2302.378929	2069.833376	2433.883252	819.1604725	2321.41537	0	1060.820038
PS(18:0/22:4)	2322.302427	4028.105465	3215.6641	2828.439098	3941.128548	2766.200216	3211.206782	1932.021177	1350.435665	3031.36783	3609.762562	3018.189941	2944.401324	1847.626339	692.4654419	3573.127996	1613.045932	799.3017925	872.9540784	788.3978427	1332.723895	2053.720366	1032.418923	766.021624	983.4263231	2104.344217	2284.803232	1299.134554	2539.941984	2290.235208	1636.517329	1108.69453	2432.591605	3340.964238	1517.255031	1002.880991	1661.981045	2455.776345	2491.979117	2097.33953	1196.059842	2022.03633	1272.116993	864.4977416	1260.298258	2407.547939	1943.306961	2587.192812	2348.519383
PS(18:0/22:5)	58189.76061	63010.83616	56858.14543	57948.34478	42976.03044	52492.75862	53397.98286	61297.28242	70859.86634	62425.26718	53928.78183	46023.34704	67405.84307	98798.141	54679.06287	99511.22837	104940.035	15071.68878	16772.75759	24167.28004	16935.99363	11881.55262	11686.70384	18863.26355	30117.9834	18990.5972	62776.7397	124658.2239	66158.1466	98741.05929	37831.61105	40658.91951	62078.75916	41346.00473	26268.9739	27818.6952	22753.11503	49873.68559	85834.53941	34339.90257	35053.27826	39999.7639	36233.24178	41050.08187	19962.01708	26453.91269	24567.7953	37872.26724	51605.73166
PS(18:0/22:6)	2965.359269	4172.207542	9566.319103	1567.352839	2600.254725	2982.580291	3302.820068	11886.40619	3237.76399	1579.701959	0	1515.19162	2202.438203	4188.890491	1530.128438	7130.120779	3615.029413	0	0	0	1043.486967	0	0	0	2066.488891	0	2619.258835	0	2005.25795	0	4222.601862	988.710589	0	3131.824818	3152.709463	1040.836903	0	2958.003912	0	1904.020019	0	2111.791696	957.1926231	1054.541499	2610.144956	0	0	0	0
PS(18:1/16:1)	8076.447694	2240.074852	16371.9093	4273.655744	11413.77412	11017.31938	10908.29209	8526.300141	6614.249698	11128.81659	9733.92121	6201.780257	4179.061338	4728.48274	6107.255641	6515.008926	1826.533773	3150.335563	1563.569377	0	2560.405705	2019.800416	3388.52167	0	4608.739908	4280.78159	7169.248854	10455.56496	12493.46387	7940.937986	9499.728811	11085.39611	3163.680646	11591.84474	4801.191249	3359.043823	3594.327029	3827.399291	4470.167976	12324.72377	3639.108014	10220.65262	8353.824374	3167.488338	8515.404551	3846.062418	2198.845855	4905.843902	2882.197397
PS(18:1/18:1)	1290.366527	5056.221015	2264.707535	5639.970819	8104.487788	4980.218668	1033.752003	4365.500124	3300.469218	18464.43554	5801.74841	4410.487923	6000.277665	1865.226162	5573.714831	729.3921914	6597.630682	1563.009698	0	0	1019.707032	0	1041.037234	2040.704645	0	2579.408701	5102.848765	7100.262354	6350.844897	2797.8284	6754.341045	5375.220356	10193.41985	2095.301315	5014.405519	1541.261637	6198.994224	8413.361484	1046.709499	0	3428.496264	2346.877829	8648.252573	6581.921922	1397.356145	0	943.9275117	1374.557927	2516.990204
PS(18:1/18:2)	24112.68393	24263.53447	27053.50699	13287.76125	13273.06453	16435.30888	8335.587216	26416.19056	8896.606803	19608.69121	12084.35381	32792.67625	29719.22518	18498.19704	17608.6961	12771.28602	6298.112492	1012.419402	1525.766962	713.6784545	2533.218334	4894.245459	490.3764339	2244.210083	1377.92767	7210.383852	7898.745368	17565.72932	30303.93819	9456.839591	12810.9707	10636.23691	16863.02036	9496.079624	17799.24891	2499.894078	6139.760641	17808.42155	1876.227203	21427.13308	7416.119605	15632.32372	37420.45339	7067.120327	5841.547531	4179.400542	5230.088077	2021.70433	1476.616008
PS(18:1/18:3)	0	0	0	0	0	0	0	0	0	0	0	0	544.2491661	0	0	0	0	0	0	0	0	0	0	0	0	0	0	0	0	0	0	0	0	0	0	0	0	0	0	567.0857883	0	670.0944169	0	0	0	0	0	0	0
PS(18:1/20:1)	2110.16077	1030.092329	999.4651542	1049.792262	0	1514.292336	0	0	0	0	0	0	0	0	0	0	0	0	0	0	0	0	0	0	0	0	0	0	0	0	1032.848319	0	0	1513.168341	0	0	0	1026.311677	0	0	0	0	0	0	1045.455056	0	0	1556.296316	0
PS(18:1/20:2)	0	0	0	0	0	0	0	997.1941525	0	0	0	0	0	0	0	0	0	0	0	0	0	0	0	0	0	0	0	0	0	1554.15148	0	0	0	1550.775882	0	0	1555.551047	0	0	0	0	0	0	0	0	0	0	0	0
PS(18:1/20:3)	3526.419397	3972.058016	6223.583765	0	2679.740495	6510.239914	3645.60454	9374.687823	1695.680331	5481.614357	3520.365668	4096.196653	3298.561736	2483.558991	5201.376777	4408.373963	3105.151624	0	0	0	1041.656496	0	1042.855565	0	0	1539.112689	2457.705512	6004.542412	1859.874798	0	1555.970053	2425.842812	3071.879989	2989.447363	1995.60181	0	0	2075.15415	0	6253.448723	2064.926197	5032.022627	1803.592791	1226.989587	1390.359966	1546.849012	0	0	1272.059063
PS(18:1/20:4)	56673.98877	68791.15811	218259.7793	69160.41544	72914.24284	114255.6376	61414.6981	138839.6727	50976.0494	129066.973	88187.98048	61520.595	74347.44433	34292.76955	58595.09846	108015.8229	54918.31984	3125.726138	3436.370594	517.39508	1042.954123	2084.971201	3419.922255	3645.236987	10785.41077	5020.654107	53369.36034	38273.31176	64822.6038	29554.94807	35520.25897	69997.59985	62268.13403	76347.94054	22273.89229	12789.93048	11924.62142	53812.80119	7925.632187	60782.13811	9865.696225	73384.73223	48350.84011	27072.24932	27241.24464	9876.515076	15319.42725	11625.10602	21854.38122
PS(18:1/20:5)	0	0	2588.872862	2788.131499	5208.12013	1535.896904	1613.164604	7266.027589	4172.95904	1230.618606	0	0	4691.253017	0	2084.504203	1037.91053	0	0	0	0	0	0	0	0	0	1041.119995	4170.56574	1679.491669	3489.791523	1050.568929	0	0	3425.466376	1433.726811	989.5957964	0	0	1563.947926	1041.347904	2085.160137	1021.757998	3453.003173	0	3668.914091	0	1005.892811	0	0	0
PS(18:1/22:4)	5727.080483	4015.386172	9865.034942	5211.313991	5211.670735	8060.346961	4701.897928	12512.93455	5007.360288	22655.48598	29654.21389	7820.567591	3366.633953	5739.754027	4505.283272	6907.299321	8877.805591	0	0	0	0	0	0	0	0	0	0	0	1174.488678	0	0	0	985.6481956	1394.707286	0	3031.106466	0	0	0	8471.516435	0	5023.949589	8823.20078	3678.264676	2754.848769	0	0	965.3654594	0
PS(18:1/22:5)	3751.787689	1598.710508	5906.645027	3895.735712	1654.326157	1741.270905	3333.16618	3659.58169	9896.160068	15281.91687	13293.69096	2093.432138	3657.38391	6087.348653	3672.663016	7870.550411	4698.945217	0	0	0	0	0	0	0	1056.878015	3121.901927	4979.653256	0	7300.601716	1828.448476	4224.513805	1384.926344	8861.21485	2727.805819	1496.900344	0	0	3634.916864	2818.594421	7390.557844	0	2834.848589	2603.52612	1900.025037	1560.374768	0	1429.362186	0	1553.85558
PS(18:1/22:6)	8691.390588	13381.57583	29513.34534	8366.377568	16048.28849	11491.26798	12187.81547	22125.08432	8900.586618	11521.35509	5325.96965	8778.038677	8426.553164	3025.522127	12397.50306	14457.23939	4083.925852	0	1530.888041	0	0	0	942.2891176	0	1522.638598	2602.03594	6397.864611	10360.77627	8074.844003	1044.831421	6631.392249	6342.23064	4480.506083	9944.370191	6969.628713	2617.426699	1569.768045	8396.830417	4383.701882	2220.302732	2612.843213	15264.69197	6296.148166	1058.848729	6239.689591	5716.491379	1458.845368	0	3092.053337
PS(18:2/16:1)	26972.23685	21039.36693	32545.46579	9833.284305	10738.49169	26944.1015	18497.35512	33008.00937	15366.02072	43663.077	43245.93119	20443.51228	28570.67152	24059.10886	30058.25432	25215.57854	20313.77662	1840.750532	5899.468342	0	7263.491925	3221.092292	6579.81143	5537.377336	14987.08828	6207.367304	10885.38042	25813.43184	24208.15581	10509.90595	13252.32709	30740.785	19397.65387	14023.3906	11880.1068	4710.289095	8889.104456	21408.21944	10013.14828	22789.13714	14370.42695	21617.00901	24390.41189	11865.13608	18507.19732	8722.047992	13435.25377	6378.247529	7966.369051
PS(18:2/18:2)	37030.56454	26184.17705	25470.44158	24588.957	27525.27078	38621.13546	26138.36422	19821.79376	26078.63497	31615.57526	31351.84155	38749.48018	59553.57254	20622.01498	21234.2757	26280.57435	32643.41632	1241.523728	2412.414216	2604.89556	5948.911748	5687.415385	9639.801218	8851.580302	11575.19822	15508.31145	12457.35513	17410.10674	35750.10435	35423.88037	44394.48875	37403.61405	28631.56158	29989.79183	16197.47768	4041.348198	14664.61606	49955.07183	5180.42357	22176.45323	20184.30632	47130.68526	46872.25911	15318.47356	26284.58821	10809.64318	12429.41441	5194.036895	9571.30825
PS(18:2/18:3)	0	0	1917.074866	0	0	0	0	0	0	0	826.4915963	0	0	0	0	0	0	0	0	0	0	0	0	0	0	0	0	0	0	0	955.6830214	0	0	0	0	0	0	0	1715.168815	0	0	0	587.9239351	645.9594353	0	0	0	0	0
PS(18:2/20:1)	0	0	0	0	553.9744974	0	0	0	869.3727214	0	0	0	0	0	0	0	0	0	0	0	0	0	567.4095908	0	0	0	0	655.5891741	0	0	0	562.5052836	0	0	0	0	0	0	0	0	0	0	1045.602599	1611.997736	0	0	0	0	0
PS(18:2/20:2)	588.0388412	588.0947951	0	0	1449.742099	0	0	467.3296534	0	0	1167.259347	0	0	0	0	690.6479821	0	0	0	0	0	0	0	0	0	0	0	0	0	577.5550646	0	0	0	0	0	0	1173.117671	0	0	0	0	0	0	0	0	0	0	0	575.3345335
PS(18:2/20:3)	1401.038214	2279.055709	7173.62042	4936.274957	4127.63867	5665.497687	5300.215048	1539.553933	9436.151104	17785.6053	4223.501434	7871.195866	2327.686662	1017.144879	12054.41696	8993.776335	8445.299821	2620.954677	490.3850783	0	496.0823714	500.6178139	3599.767935	506.4035628	929.1773924	2774.84418	3301.882616	13066.68578	8745.835243	4453.562624	10160.27829	6632.425723	5539.823574	16739.13303	7258.726695	1460.244061	1088.822704	3127.295349	2086.192185	12640.21995	887.2319608	18410.86282	12112.35687	3276.596672	1902.350993	5204.439723	5751.188887	1769.879345	2100.018204
PS(18:2/20:4)	34366.8203	33172.29859	120148.3961	35221.71759	34003.70128	87043.94424	23836.62364	57390.92093	44520.04814	153134.2467	82639.05398	51023.70469	68548.63568	35994.98055	46321.14584	103542.6286	35177.29452	4754.118645	6144.990148	4246.614445	7315.996448	2620.642419	10957.57432	4184.166545	21850.43814	16833.44521	39535.77987	40520.01892	88081.31516	47861.69726	42120.54916	106437.5166	63066.66969	88857.29165	25123.04089	32049.52885	10875.85703	77649.92613	36503.235	88024.11033	14338.82028	46676.94778	56984.35596	32795.26394	24183.09022	29257.29576	34339.95603	28039.97072	39143.55423
PS(18:2/20:5)	0	0	1562.101221	2394.495932	1801.522563	0	1224.802805	1475.519649	1454.968326	3158.763327	4177.148765	1586.139167	2555.763625	0	4103.682203	3053.629259	2466.159442	0	0	1027.630001	0	1054.195549	0	0	0	1014.249259	3101.232464	1572.472917	2084.197091	1576.212181	0	2373.702353	2913.116687	4490.264038	1540.103293	1572.023938	1416.258353	2057.642555	2036.387527	942.8594404	2256.400459	0	2125.770875	0	0	0	0	1048.886066	1040.765833
PS(18:2/22:4)	4857.074651	1897.633344	4590.712189	2346.54114	7077.996208	4992.357746	2505.134612	2220.934215	2642.233783	6798.470209	7232.630039	6046.490788	3301.291784	4906.137975	3722.815014	6840.748655	3783.840673	0	0	0	0	0	0	0	0	1023.316632	1842.349707	4187.507964	8904.794488	5329.844367	4249.036981	8023.300818	7989.448704	3741.103482	1016.562923	4542.199873	3538.18707	3870.889441	1540.774884	6911.273403	1039.40577	6571.211684	2692.811274	1429.284268	0	996.0001087	995.5500669	1032.326908	1788.389856
PS(18:2/22:5)	1812.410192	1992.702088	10112.45243	7047.411075	721.8126115	2445.261902	717.2346359	6286.171197	1178.94856	4824.360412	4471.56143	4835.201343	4026.187124	4542.512587	5577.417533	2631.808841	9331.471013	1041.541744	0	0	0	0	0	1042.874903	1927.104395	0	6465.073007	4733.967622	8645.963302	2892.263967	4179.609246	7172.475424	10159.1099	8162.910404	2312.084882	1385.973092	7140.387198	2802.195818	2977.97822	6142.369051	0	2874.563341	2125.75785	0	1949.060863	0	3987.911667	997.3988133	2435.510635
PS(18:2/22:6)	3655.018883	10332.83417	11493.93271	8542.239699	10519.38916	6116.794508	5874.565132	8798.204447	4988.652384	2220.640062	3536.337814	5305.869589	10968.11545	3094.384408	7485.293445	4692.660336	8801.631985	392.6107732	1522.186618	0	962.197343	1020.230579	1883.91927	0	1455.279746	3146.868318	5077.60018	5379.705079	4846.842721	4539.876388	3991.818436	8838.155285	3545.478694	12767.29049	5573.048538	1801.098478	2553.575594	5491.010712	2375.61472	6850.815244	2779.161507	2155.032515	2474.91791	2490.469799	1517.316791	1681.045388	0	917.5537578	0
PS(20:0/16:1)	9752.146808	9389.800848	12107.61722	16284.80782	35106.51102	31355.98749	13224.76617	18057.62748	32031.4914	10614.69577	25370.91236	19012.32886	18415.49754	7949.441818	15953.79615	11020.29544	12822.43042	1968.59058	1770.131509	0	1181.825189	247.8915134	6762.636191	2665.221596	0	2009.841154	31518.09152	25952.29816	27869.22482	83906.21407	36083.89548	29014.03174	62697.10332	44027.41928	40252.67797	37399.94238	7010.421336	19178.48116	10932.62263	52308.40489	28345.2433	39635.37347	16703.86482	15949.91594	12956.29784	19449.94109	8510.849777	11703.51366	10487.80665
PS(20:0/18:1)	1756.754398	0	5179.640958	1481.348585	1741.374337	6992.818341	3818.217256	4943.20718	2969.627554	6885.029407	3525.805574	1288.624311	0	0	2076.401566	1989.472932	0	0	0	0	2648.095465	1021.968232	0	1039.452092	0	0	8693.434011	10188.09676	5596.560664	7940.634458	7223.152042	7577.693596	3231.667261	6032.386118	3035.881693	5093.740971	1262.010946	6383.377399	5029.957578	6654.954523	2287.691575	7914.50424	3712.587094	4825.468025	3003.023932	3002.793987	0	2000.562947	2001.189497
PS(20:0/18:2)	690401.3134	382601.8756	431915.1484	449985.7841	477992.9633	744075.698	595178.488	789729.4563	634997.2405	354283.3202	609400.5179	643205.6613	724561.5127	624888.1758	624774.12	460828.1033	502388.2508	22973.48582	44349.50331	24896.4228	30106.92042	42876.76211	54305.70596	84427.24128	54395.42395	73514.80847	556075.096	356305.1443	339797.246	303165.4023	477906.0843	350905.7644	349168.3861	495621.1377	303727.6132	175631.1754	119974.9229	477184.9663	143141.2919	352929.7488	281941.1979	378274.5545	446182.7183	360562.6312	283475.5298	302591.8113	293407.1789	125220.4338	208649.9268
PS(20:0/18:3)	6484.157154	4607.199288	2903.444152	10052.75231	3847.790715	11355.64101	9450.294328	8600.386335	15897.79619	9411.38279	19019.56026	6637.580207	6262.564208	8071.657279	9545.594378	4031.736898	8504.386414	0	0	0	1753.309175	2350.49293	888.3199851	1468.301005	879.752758	2293.117335	9394.738459	1133.240359	8169.334146	23176.09985	3967.230199	12161.85073	7454.51577	7487.256314	13199.57792	1886.698128	3452.704987	8502.08344	3147.757714	8420.458247	5459.331636	5782.891095	6719.228116	5453.44686	4096.121591	8210.903071	5307.59137	884.0257002	3489.105731
PS(20:0/20:1)	829.5146973	577.4954698	3042.362397	1115.509776	1379.368195	3600.246591	1487.811902	2229.153213	6445.359725	0	1047.323546	0	2499.333485	1119.921779	552.9228566	1358.916438	0	0	0	0	0	0	0	0	0	990.7422538	1192.151015	3390.005093	1980.186671	1715.843872	2070.304125	3468.020167	2213.750228	2253.708042	975.0406391	0	834.4098489	1725.229247	1143.599931	1409.974549	903.4163168	1628.497751	1195.381243	1701.555754	2030.719978	1450.14175	0	2027.233194	871.0707337
PS(20:0/20:2)	7547.057645	8717.135696	10072.15255	12073.22844	6725.362743	12559.39174	9232.329361	9402.040923	14552.19991	7180.078891	8708.941976	12507.64288	8328.14764	10607.99078	5548.115366	5010.53655	4505.887547	862.8849373	586.4080688	0	611.7700677	0	857.0459106	1730.951925	581.9801075	562.8901414	12975.25943	5641.619361	8199.269239	11237.3926	6562.64479	8714.025129	10134.58468	8685.610749	8720.268651	4231.991259	4352.692135	5310.956705	2089.776194	13475.27152	5201.380532	9937.635971	11670.95953	4937.742981	8172.609486	10305.5602	4644.67014	2384.750673	5201.862173
PS(20:0/20:3)	36005.30653	14140.971	26743.70433	23757.88185	30721.79844	53387.89468	34499.72723	35710.39977	59412.47065	39980.413	59720.59897	22355.79124	28437.59064	39105.55714	31631.83369	26168.38741	23487.57341	854.2804464	2174.954896	1439.911569	1628.156554	1713.991537	5201.086212	4631.836685	4055.708571	7659.972355	65892.58078	32460.19037	35491.65211	66647.00172	35549.20667	13660.14214	54188.08995	66429.26342	19133.68069	27648.62384	15355.48459	25395.68435	10356.66021	70736.76756	31546.84259	55779.73965	44929.0038	10610.31075	27726.75862	37700.16575	24696.89117	8390.33865	8184.947853
PS(20:0/20:4)	104490.4581	58294.5536	102691.2349	90914.87604	125694.0926	154558.0187	97715.95437	158596.1638	116084.3539	86376.55944	112826.3973	105524.3628	113664.428	97162.10231	122500.2102	96561.88796	108735.5342	6639.27021	9897.621805	6652.804499	5001.142382	10270.46108	12202.05715	12560.40069	9475.321841	20872.32766	109183.4533	103962.9982	96024.98852	125655.7371	117895.7243	109815.5479	147994.0705	172920.4795	56449.31871	65360.32596	42801.94337	87092.04084	37511.81325	137500.6271	50119.25882	121265.7829	107518.7214	62978.50716	65176.61013	80478.31284	68637.94153	30563.79648	46120.17991
PS(20:0/20:5)	1667.090793	0	3238.701075	0	0	4739.639024	0	437.1804892	584.639345	5336.30786	564.0296811	872.884119	0	0	0	576.7334973	0	0	838.9094551	0	0	0	0	0	0	849.5847309	5212.131933	3509.17975	5786.425861	9034.659853	2326.484454	7324.859999	6517.956782	15198.63115	2447.168632	1778.032653	1834.733206	2722.868706	1700.110217	3416.582195	2599.552355	5168.605772	3554.642816	2995.413337	1445.64912	1737.734882	1944.792324	0	791.1601619
PS(20:0/22:4)	4798.251028	2292.156745	3637.71008	4218.489847	3547.772518	7850.755587	5190.682808	7448.735684	7402.157719	6072.543403	11882.00598	6673.714952	2835.811801	5921.260031	4705.00883	2642.835348	3463.133122	0	0	0	0	549.7209003	561.283622	0	557.4536472	746.9164733	6042.441145	4867.654135	4906.063762	10789.77192	6168.47921	4136.466637	4782.717822	8121.38891	2989.583818	3089.812245	1260.307026	7084.831612	839.0997777	8392.980998	3909.848077	9362.531782	8646.988661	1731.159233	7498.82819	4007.643196	3208.920758	2370.927791	3682.406199
PS(20:0/22:5)	10043.24669	5786.886147	10452.51865	9320.850785	9810.575326	18417.55317	11602.08586	13942.66469	12890.04708	14402.74801	19036.81887	14739.91747	16070.81852	13257.57815	11144.92226	5348.790709	13818.34846	0	0	0	1595.95379	1676.926202	0	587.7380838	1374.679795	1436.321898	13591.45141	5729.890776	9079.313554	12220.94412	5378.337799	10478.41102	14246.59766	22382.73545	6229.808249	3312.091791	6139.716927	12562.31901	3505.388528	8247.290723	4379.808431	14367.37238	10532.55391	6508.387562	9400.360848	7718.671651	13311.68869	1456.940735	5482.576392
PS(20:0/22:6)	21568.82958	28568.22225	31148.17379	31331.85482	29962.0392	42166.05513	37243.99201	42226.44595	46247.6952	15025.83023	29821.58501	26775.59146	56659.35692	21000.27268	38971.05926	28945.03788	17046.15808	550.2013046	2997.527762	256.6522946	510.2973635	1610.070809	824.6674459	2367.353408	4401.787375	2761.627055	19639.3069	16713.30026	5990.46413	13676.49791	17179.52683	16309.02346	12558.88585	23030.72232	19812.4996	9662.597248	6023.415816	21074.96004	12713.14984	8421.569609	12524.91939	15622.13859	19755.26159	9549.039812	13060.41882	15198.11329	10511.00131	2521.187489	5316.408286
27 OH cholesterol	0	0	0	1935.967412	1935.949539	3868.766605	0	0	1935.949494	0	0	0	0	0	0	0	1935.9675	1.551784976	5.728389641	0	7.940757447	0	0	0	0	0	0	2.845534217	2.007991342	2.067631597	0	0	0	4.015261692	0	0	0	0	0	0	0	0	0	0	0	0	0	0	0
Cholesterol	6758968.911	4820736.968	11731702.33	9157678.183	7254387.249	6069165.014	9264804.484	8974215.57	4624134.679	4424533.194	4440864.424	7387034.296	10692188.96	4796243.506	4700179.485	4134965.628	12244020.05	9938.286736	9894.253411	9960.918926	9828.360164	9935.305242	9856.354753	9930.843905	9922.153197	9926.424759	9935.612682	9912.830105	9950.792732	9941.492445	9964.465748	4550.736386	9958.708882	9969.170735	9944.822447	9953.676584	9925.038258	9962.225893	9929.715147	9925.802917	9932.814092	9976.708614	9962.188521	9939.284482	9939.472674	9958.619434	9917.180088	9920.224515	9959.751014
MAG 16:0	0	0	0	0	0	0	0	0	2884.252947	0	0	0	0	0	0	0	0	0	3.820910072	0	0	0	0	0	0	3.333590726	0	0	0	0	0	0	2.036087747	0	2.279083136	0	0	0	0	0	0	0	0	0	0	0	0	0	0
MAG 16:1	0	2356.76571	0	0	5130.58335	0	6767.101295	0	3775.553644	0	0	0	2045.974977	0	1934.55829	0	0	0	0	0	8.871004352	0	8.033894963	4.053445518	8.475509446	15.97697254	10.24304748	10.79294171	3.241014419	11.58189557	2.488248202	590.25717	6.318811448	2.230985025	5.692078979	0	9.974847926	6.779218368	16.36172417	2.945046048	7.196905256	0	0	14.56919573	4.886537001	10.86211456	0	5.265735553	0
MAG 18:0	5762.208696	0	0	0	0	4834.589771	0	4615.593798	2263.279885	1935.834274	3868.983443	3652.035559	0	4793.872274	1918.740661	0	4834.773618	4.115977773	5.685198111	3.192928119	35.51808288	9.839946464	5.373411793	0	0	2.761396506	3.673807648	3.608052571	1.571684559	5.951983296	6.512239111	607.339003	9.370538556	2.426440651	6.858257711	7.210366558	8.875598445	2.043718254	0	1.522074142	3.248364867	0	1.630093725	0	13.02240278	2.211435636	3.5336874	13.360732	0
MAG 18:1	5801.868987	1825.090166	0	0	0	3869.031694	3784.610698	2240.427811	6799.721733	14509.41005	1882.708444	0	6710.606044	7063.933816	0	7271.018051	0	31.74163119	18.25349827	4.938699553	18.00392474	11.13594895	27.14783513	10.67497779	16.66329645	6.359279408	4.380067942	15.38413755	9.813369095	6.14429477	4.801401936	481.8601198	3.231451856	7.094935639	14.39252299	12.20800439	27.08606371	6.217168206	16.46137736	10.9720667	8.015503951	1.30536808	7.203876247	7.00900606	7.901455604	5.510602064	38.67023136	16.16122319	5.457039497
MAG 18:2	0	1186.919237	0	1933.07592	0	4780.230873	2474.522648	4898.445508	2262.713576	0	7718.138129	0	4888.186511	1556.606055	2104.818394	2823.409574	0	0	0	2.050250801	0	3.069576746	29.16356591	0	2.979589863	10.32151563	5.346369427	5.68392647	3.819303561	0	0.885804525	0	0	4.243198671	2.115190804	0	2.218458011	0	0	3.784689576	7.344717093	2.262967209	2.488652819	4.592619396	3.640324897	2.212657608	0	7.704000227	3.350235294
MAG 20:0	1934.05807	3652.274592	4558.929845	3842.932931	7098.434453	5776.526678	3867.703065	8003.421501	4258.592681	1570.651753	0	0	0	2071.049168	1952.239191	5767.130575	6770.945264	4.814216739	6.036385871	2.093781846	6.100616354	0	12.47133145	6.978324205	3.507286083	4.75621199	0	1.233173257	0	3.364616029	3.278698318	671.3278948	3.057311226	0.604006566	4.089406314	3.907421619	2.256221707	2.60704518	5.237726802	2.560408168	7.082427516	0.465133748	5.554992795	0	0	3.663983403	8.184137979	3.740228028	4.86034373
MAG 20:1	2343.249713	4032.617896	2115.679776	0	1935.802721	3871.787292	0	4596.871981	1487.595885	0	6919.833413	1935.355145	2842.255091	2280.177756	2008.236976	3867.327869	1935.355167	0	0	4.101798949	7.742562501	0	0	0	0	2.150340155	0	3.352164541	2.984775578	3.756732244	4.366895295	259.3913621	0	2.009021396	4.558184915	0	1.711484782	5.080210996	6.374429247	7.744838914	6.090211109	0	1.364593103	1.864069569	2.458638825	0	3.65668246	0	0
MAG 20:2	1935.274492	0	1694.113117	4838.268034	3845.35455	3576.993933	5805.199243	2836.257496	0	0	2836.253244	0	1886.835218	2171.218849	1854.302993	7702.213737	3815.419069	0	10.48393334	4.099047286	0	2.530931798	13.25557806	5.340570562	2.777063655	0	0	3.339806254	4.653813752	0	0	0	2.47099526	3.012011732	0	0	0	1.701346792	3.192079359	0	0	0	4.864821781	3.554073545	1.889233686	2.138892486	0	0	2.430940143
MAG 20:3	0	2972.602833	2664.413649	0	0	0	0	1934.05807	0	0	4792.828776	2882.49358	0	0	1487.516666	0	3625.934272	5.071481842	0	2.266229227	22.23786712	3.809022042	7.904898236	3.491159581	3.73970058	3.377858662	0	1.861273749	1.838001072	5.163419121	5.169213518	0	2.398391608	3.378028364	0	5.39912252	0	1.396927652	3.594290887	3.042680097	5.683365276	0.799332526	0	2.076566663	3.640195577	1.711118926	3.59627924	5.482803535	0
MAG 20:4	0	3398.843709	1935.950089	2900.45218	3541.688435	2590.8829	0	0	3613.578452	0	2902.252956	2899.537232	4040.610497	1887.626825	3626.210678	3045.023915	0	2.626472567	0	0	0	0	0	0	0	3.957994928	5.183770873	4.912489685	3.103874266	3.153871956	0	0	0	0	0	0	0	0	2.216954775	4.491361211	0	3.262642468	1.378534819	4.549145094	3.685995814	2.422643975	0	5.686879551	0
MAG 22:0	2517.701464	1933.024596	3064.329083	2902.300596	4339.631836	2902.564872	2559.090565	1935.949406	5524.095927	8704.329575	4833.122631	1839.955099	7603.634196	1935.855072	2696.966602	2104.431302	6147.108003	0	0	2.045807646	0	6.219391201	5.298560749	8.651928733	3.791911257	0	0	2.82084105	0	0	0	0	3.050779506	0	0	2.733057905	0	0	2.287457656	0	0	3.378356213	1.389522707	13.34266508	0	0	3.025697061	3.840161219	3.942806069
MAG 22:1	0	4841.83483	0	4816.443154	2902.497784	0	2865.888463	1968.987541	0	2359.733623	2810.897783	1868.915044	0	0	0	1874.868827	3323.738767	0	0	4.098867515	5.690706582	2.466497171	7.904898235	0	8.84680782	2.253386381	5.411848739	5.509685475	3.065535836	0	0	259.4093881	0	0	0	3.990338684	2.216267177	4.234206833	3.192052695	0	0	2.294317967	1.390835333	0	8.175819778	0	0	3.84476036	2.386227247
MAG 22:2	1934.62529	4854.563236	0	0	1935.886762	7738.504161	2558.883868	0	2616.34604	1749.211323	0	0	2254.701633	2865.715172	0	1749.020968	0	3.384228365	3.816269189	6.124592129	7.506651519	6.216632124	0	10.48194107	6.319270597	2.234723435	6.132905706	3.452857396	3.288946111	2.065127642	2.67862377	516.8805665	0	0	2.279082879	0	3.801729957	2.521204192	4.162627933	1.98526121	0	1.146792745	1.797187172	1.48130954	2.456996391	4.857289776	0	0	4.759748479
MAG 22:3	1935.965977	0	0	1935.966022	2079.612048	1641.136482	1001.393659	1556.487241	3309.208392	4836.763006	1887.544039	0	2168.437952	3564.274151	1887.626825	2340.044061	0	0	13.34448875	2.21583269	11.90538776	4.945633503	7.95126013	3.159261617	2.493524584	3.377092133	6.129844105	2.846126109	2.046465477	0	1.298400295	337.5924715	0	0	0	0	0	0	4.784855385	0	0	0.463311107	2.083744766	2.384441258	3.66257179	0	2.835347101	0	0
MAG 22:4	3831.262905	2899.843424	0	0	0	2902.499932	0	1487.489811	1935.9675	0	0	0	1387.571905	1479.165727	1887.507479	4488.976857	0	0	0	0	7.831760449	0	7.738822328	2.686691483	3.789690999	0	4.092414562	2.805976701	0	0	2.312317376	0	2.84234208	0	3.120340233	0	2.206939822	2.551211511	2.419277169	1.108859727	0	0.533719159	0	2.996594684	2.456316434	0	5.415695413	0	2.434478566
MAG 22:5	3645.525882	0	2653.182273	3959.442112	3782.800741	3560.255515	4891.033953	5778.06611	5183.184449	2475.783124	2854.881579	6138.601283	3491.644841	3866.746691	2875.622765	4552.146048	3492.419177	3.958132593	9.464953877	1.853238024	5.092833593	6.589919277	4.847909119	6.497302305	5.668676198	1.732541837	7.544287726	5.683387958	0	2.014056859	1.742409591	489.9706012	3.203336359	1.815375132	2.059375771	3.990996842	5.236555965	0	0	2.534802435	4.943848612	0.457282856	5.278791229	0	2.650837014	0	4.856989808	0	4.557305401
MAG 22:6	0	0	0	1749.333903	0	0	0	0	0	0	0	1932.958288	4275.096321	1935.834453	0	2883.109354	1934.638268	0	0	0	11.06210668	2.466403711	0	0	5.548148701	0	0	0	1.991943766	0	0	0	0	0	0	0	0	0	0	0	4.26121438	0	0	0	0	0	2.819798289	0	0
S-1-P	0	0	0	0	0	0	0	0	0	0	0	0	0	0	0	0	0	0	0	0	0	0	0	0	0	0	0	0	0	0	0	0	0	0	0	0	0	0	0	7.95268471	0	0	0	0	0	0.421082251	0.698641507	0.154714862	6.069861696
Sphingosine	1918.767249	0	0	0	0	0	0	2902.401574	0	0	0	4314.329622	4838.179983	0	0	1968.947218	0	4.449338418	29.11256237	0	16.13557424	5.404854624	6.553280764	7.140492227	3.246326527	10.98233683	6.248954178	11.03752006	5.780548801	13.24392577	0	1235.235037	3.311072716	0	7.734028811	6.884107353	9.377574832	2.641848638	0	23.55230962	13.31934996	6.922161576	1.385832897	2.295831602	0	5.368745641	5.52672425	14.53424645	0
[truncated: 7 more columns]
