# Supplementary material for: Plasma Lipidomics Profiling to Identify the Biomarkers of Diagnosis and Radiotherapy Response for Advanced Non-Small-Cell Lung Cancer Patients
Source: J Lipids. 2024 Jan 27;2024:6730504. doi: 10.1155/2024/6730504 (PMC10838201; doi:10.1155/2024/6730504)
Supplement: Supplementary Materials — The original data for all analyses in this manuscript are provided in the supplementary document, according to the corresponding subgroups. The corresponding subgroups can be obtained according to the supplementary file name. [file 6730504.f1.zip › Lipid (during radiotherapy vs. after radiotherapy for lung cancer patients ).txt]

Sample	57	58	59	60	61	62	63	64	65	66	67	68	69	70	71	72	73	74	75	76	77	78	79	80	81	82	83	84	85	86	87	88	89	90	91	92	93	94	95	96	97	98	99	100	101	102	103	104	105
Group	RT	RT	RT	RT	RT	RT	RT	RT	RT	RT	RT	RT	RT	RT	RT	RT	RT	RT	RT	RT	RT	RT	RT	RT	RT	RT	RT	RT	RT	RT	RT	post-RT	post-RT	post-RT	post-RT	post-RT	post-RT	post-RT	post-RT	post-RT	post-RT	post-RT	post-RT	post-RT	post-RT	post-RT	post-RT	post-RT	post-RT
FFA(14:0)	1082747.504	720446.8869	712231.457	368259.6151	1002084.272	1044978.365	768414.0541	287247.3255	690822.711	779289.6216	2237319.573	916594.2262	1024380.243	972907.5132	1199096.519	1442970.035	0	0	0	401530.1811	607953.9646	140941.7394	237225.7148	417209.754	837341.5884	287819.1925	1025647.961	1243163.096	492709.1522	0	2248152.494	595946.5958	799922.0098	1832732.065	279640.073	1128901.702	960814.3752	354360.1945	773078.764	1003379.213	499152.4513	974904.6414	588002.783	883801.0207	992552.9066	860496.7804	977033.1473	1749475.611	2214568.412
FFA(14:1)	490626.3793	510812.4985	1059209.772	1641163.344	693021.8818	743863.7966	593506.4224	602965.2047	1083257.743	391979.131	817034.1519	518811.0626	807609.9302	732032.1964	689805.0929	836103.3776	0	0	0	722436.7095	779079.4103	517775.8391	565921.4014	659062.5337	634563.8599	435994.064	515821.4801	528555.0598	798275.5179	0	674910.042	1094704.097	334924.258	908028.8736	700042.979	658599.4129	535618.7917	705151.7776	511970.0412	835892.5059	575133.0902	633843.6382	745366.0168	567230.6261	764805.1373	475881.3601	1109414.245	842697.0886	852857.8649
FFA(16:0)	11576427.14	14546107.79	14088662.41	4223536.485	5695313.541	13951499.08	5768575.349	6025320.563	15360406.26	7344914.832	15286300.91	4716593.841	9970040.649	6857759.267	5133584.953	21439232.55	0	0	0	10320786.57	11693797.39	4396242.42	7095100.274	8730636.524	16836708.93	5138577.712	5094113.825	9743464.233	6846582.953	0	23043903.17	9760565.815	18350000.88	15713334.42	3263904.108	14097203.13	17650488.47	5455683.725	5909197.872	17563255.21	11507360.48	3976837.357	5188461.216	7081226.142	7194479.11	2434845.563	27606755.92	19271944.94	20843258.46
FFA(16:1)	631634.4604	1258667.552	809118.777	78665.07151	156438.375	896817.8893	194378.9288	1112883.333	1428027.142	1118862.728	3374316.781	104185.3684	588058.777	457261.564	1341066.801	3586309.276	0	0	0	1286822.049	1431793.679	356625.2909	1002754.6	1495249.553	5250637.924	956535.0263	249292.8876	411828.4291	527646.7431	0	2795892.02	824612.2092	1897199.985	2618311.947	204522.7068	1024454.285	1336917.171	533968.2756	1367731.913	2148245.775	1803287.831	110844.1254	147099.9839	755509.9842	597395.2092	149373.4151	5971841.754	2949344.597	2295049.672
FFA(16:2)	298664.3286	314478.5398	722157.896	335491.303	368891.3567	728545.7234	215513.6218	368699.9288	453676.2325	363571.651	372204.7549	91799.10914	383170.8769	346356.4121	738219.101	282506.9515	0	0	0	420709.4681	198492.6899	272312.5508	324764.4335	209926.1974	298442.536	231461.7994	359338.554	358876.9747	300724.5618	0	346835.3857	353192.5079	275319.965	318746.8771	158704.2921	313228.0653	91168.04808	199711.2248	355651.2217	207102.4722	309118.2871	356711.4855	168808.5484	297787.7301	320449.7134	205799.2584	305237.1876	247436.1075	393919.7765
FFA(18:0)	8254586.994	11847260.36	8442192.018	3804376.94	3928612.617	9277808.613	3507866.427	7862581.407	8169567.91	8043037.468	7267144.703	6142256.223	6347845.514	4098171.805	4936854.897	9553089.155	0	0	0	9574360.51	8864213.643	4511762.152	5451246.562	8000841.531	9674566.008	5737966.721	8834580.126	5962124.518	5547829.026	0	11462528.17	8508309.254	14810174.47	9291999.728	4436605.626	11466408.88	9005827.021	7313838.54	7598431.7	8760158.212	12916760.66	2721604.48	7515761.532	10579859.66	5462561.815	3994620.526	14950628.71	8633694.547	9223929.708
FFA(18:1)	20178494.02	44924411.67	31066696.84	6222336.794	9254260.946	21788848.71	8183063.045	18023214.18	22617078.91	26833176.84	34773361.07	6035769.168	21056966.31	18299100.17	4932361.003	50616234.38	0	0	0	27624294.25	28976306.83	13290732.97	21013787.73	23953509.28	51332748.64	22355577.57	12494801.95	4895976.386	15348182.77	0	41985693.32	28181619.28	50742382.08	31631646.72	6929136.918	35740391.5	41836731.94	14292711.73	19954127.96	36198613.05	35873167.65	5659501.808	8943245.126	28826323.54	22138819.08	4375036.066	80592365.7	29064890.67	26293838.52
FFA(18:2)	14796058.47	22456271.43	14862271.14	5936119.222	5974559.501	14027347.19	4424555.315	10380206.81	13007106.35	14875317.99	14044434.27	3807143.21	15870603.37	9166314.472	4187533.707	37566465.36	0	0	0	14970071.69	15260341.52	9172864.924	11016630.17	13837789.6	29157616.7	11613540.83	6431376.503	4201719.577	11470468.65	0	25874850.37	17331095.38	32272802.62	16193625.43	3516451.328	22432287.59	21827249.06	7584885.717	9482319.078	22449520.14	20672426.68	4210642.106	8324277.413	14067929.3	10296794.85	3415465.952	64472745.3	17832252.07	15710833.3
FFA(18:3)	1442723.325	778933.2948	614651.4144	270371.0557	591459.4863	749029.4955	360574.4588	649724.7274	743237.0914	1195175.083	640887.6842	195503.0942	1110006.27	371413.2135	231482.8049	1740667.321	0	0	0	690465.0856	889832.994	605512.2655	417750.8291	712869.8059	1514294.287	616172.4676	434731.1272	587112.1249	631531.6344	0	1257311.063	850750.6074	1226116.676	986810.4151	271961.4699	1555187.099	1051755.624	486902.022	582461.0227	1254751.021	1705288.082	268566.0856	558181.1426	528846.7534	445720.472	123901.1555	2902333.603	1412248.482	953053.4252
FFA(20:0)	1537331.079	1838814.476	1859435.807	1903807.441	2701339.34	1986775.745	1525318.455	1952611.083	2179033.835	1576768.696	757355.4221	2063791.205	2012312.855	2086835.199	2049749.673	1674059.378	0	0	0	1156282.514	2412748.985	1090484.558	1457251.808	1575853.096	3312879.444	1317341.31	3203687.589	1166141.342	456712.7473	0	482204.5365	976926.6607	3133730.241	3482030.473	2300633.607	2217816.196	1918227.301	3223948.69	2428434.062	2545933.119	2563881.115	930744.0527	3153918.155	2115806.03	1973966.918	2103444.449	2423934.659	1104642.234	934503.3445
FFA(20:1)	393034.1904	1530406.781	989443.7763	155812.5956	284169.7296	543262.1942	174613.6988	518086.9526	325115.5915	761321.5455	616247.5548	342654.1663	746440.302	301203.6884	338539.1826	1011684.657	0	0	0	442168.6945	512933.4396	225893.2275	378195.6737	447867.4552	1031830.241	457480.356	433926.9165	560924.0867	218291.257	0	895438.5635	1136651.584	1114086.087	878264.8291	149734.0486	741111.4313	1075856.782	271983.4266	318351.1265	543160.7368	918691.0782	320364.1927	246454.5017	1634312.173	382237.8198	277413.1789	3369954.844	559946.8731	463577.8201
FFA(20:2)	378320.9985	897852.4939	388867.2695	201440.1536	137949.8102	340496.8288	141108.8635	412940.7848	325059.1496	495584.9191	480899.7976	192334.2344	308250.4729	214032.3588	142491.2002	839875.6458	0	0	0	375211.4368	554065.7622	257671.682	328610.9607	429950.3425	795471.3499	346374.8849	223709.5079	79047.4235	257943.9948	0	569959.8283	675874.1089	889162.4958	466669.7918	155287.1483	537442.0947	727633.5448	270998.666	405370.5142	556822.2864	778337.6858	82762.33302	252275.1986	428397.2193	272484.5439	105726.1013	2469882.556	365896.3887	399669.3981
FFA(20:3)	376313.6416	948297.9512	443128.3391	359412.7608	269179.7542	354014.1499	302834.2424	919758.6633	449942.9782	484789.2919	398951.1159	544200.9305	377092.4752	309743.402	382294.7449	812918.8196	0	0	0	368997.7064	643077.2266	335875.8676	346467.6704	456055.7081	916876.241	342756.788	582990.9918	379324.3887	361156.3852	0	637619.4926	1685287.491	662188.3944	362220.5374	539124.3593	321420.6349	485543.8106	584759.0662	517917.5332	590448.1574	597669.4338	462588.5956	755298.0496	636666.4829	471873.5626	420277.7562	2687740.856	396351.8303	375844.1259
FFA(20:4)	553282.052	1944766.679	482675.4311	353820.0488	383275.6219	428266.757	472701.4166	1309055.152	920199.3965	640975.3842	1415841.638	447515.6427	457546.3036	554665.5417	371989.3977	1072102.497	0	0	0	772898.1565	1304365.357	653087.445	904288.5859	1028332.51	1274702.264	476289.4457	447411.8229	237076.7961	468885.2537	0	1020244.131	2719777.05	1159634.451	954442.9079	233565.3389	817592.7493	1101707.435	243119.1266	1417885.744	1787022.196	944235.2156	350713.8782	518544.7999	968270.4391	553762.7464	266152.2887	4022545.541	971502.2386	1316612.619
FFA(20:5)	168635.9814	202874.8671	224787.6154	255159.2333	292598.5241	204024.4317	205828.5958	123487.0572	222343.2251	707180.8194	243695.4601	618560.3608	176922.6244	230645.5793	228231.6937	200961.8896	0	0	0	356284.3707	1490541.374	442228.8985	307421.7802	309298.068	664196.7083	343038.3685	634827.8662	343866.2769	3199987.868	0	260891.683	169628.3325	500411.0071	322711.0974	318526.6993	254453.6712	163404.5909	265705.8442	496756.2677	221879.7226	567085.0644	313255.953	614918.0672	586261.2334	198287.2031	292927.7868	216788.8256	202333.6238	131869.9085
FFA(22:4)	195622.3655	982956.1799	277645.2871	128903.7932	115621.9129	217622.9479	71656.27965	697625.3639	324703.3737	441644.3162	507210.0363	144294.2828	203546.0596	203746.4256	84174.28282	640039.1248	0	0	0	194503.4541	379361.0194	181368.6135	331204.2954	330884.1502	559313.4452	210577.5615	187127.3399	54857.79727	99289.585	0	341384.558	1244966.683	691361.7201	358388.2778	153779.685	478473.1796	528357.8951	197465.338	441145.767	595150.9549	536358.329	83828.99631	230187.618	390614.6282	232523.8051	90846.36735	2730071.736	260184.2227	265886.5065
FFA(22:5)	197902.6125	618582.8701	329765.2375	67141.86854	347987.2064	114723.3008	99524.71171	442792.3563	320368.7027	337138.3062	242754.8758	95470.53048	150639.286	200445.3344	112227.0469	702951.047	0	0	0	224123.273	365008.8961	198406.2502	191891.6532	222070.9167	339095.2171	177795.4775	132851.046	59085.87263	105180.8549	0	437418.1136	1002171.326	600437.598	355836.8705	51466.16512	388168.2445	442207.0282	157958.3166	388150.5772	672103.0173	493624.0495	123241.6827	167586.8246	260628.2284	213634.3326	91298.25156	3050917.292	269608.2856	218126.9055
FFA(22:6)	205449.3208	364422.8473	225031.0453	66776.56457	113777.8644	151898.6612	210232.6253	297622.1168	240126.2657	451455.0615	219965.2338	160804.0728	172117.3204	280037.2047	38053.13955	572666.9042	0	0	0	276448.8058	390751.5843	211479.6361	185166.7216	240975.4715	342224.5123	138558.6079	174530.0492	103432.3335	143229.8629	0	736144.4023	687081.1375	532527.3686	504443.746	75633.64065	283312.5182	321031.7928	274625.3545	344995.7256	602860.3025	546100.3184	27259.64055	183288.6738	240949.2991	321446.2207	20675.4155	1327716.255	250419.2557	256595.8614
FFA(24:0)	1720215.122	27433622.02	14297119.76	5760320.956	15161598.6	3171204.462	1221581.498	6672369.37	24681968.24	1495451.356	15041708.52	2054134.107	4976757.57	2542596.066	1853644.033	961236.1954	0	0	0	4492667.521	17610646.81	21336831.99	18890364.19	4057251.891	30156300.76	679918.43	3042801.11	10546983.1	3823393.831	0	12135071.4	15901240.94	5275749.753	15137050.22	3046241.502	9041591.156	331945.4159	997749.0283	4971323.098	6979997.34	1701939.814	17086436.08	3095132.662	9547286.384	3062811.333	1543686.092	1262394.636	1734759.052	13180090.71
FFA(24:1)	149397.1752	918706.3901	517415.2802	180022.3186	142441.3622	288714.0543	68422.64646	499345.3498	89927.5061	430858.3641	227888.7485	481913.1923	277297.4067	157376.8754	43415.72032	456247.571	0	0	0	146302.0006	169037.8408	143325.0394	177217.1865	259337.3935	366609.2593	173003.8522	823609.6314	139121.7519	73142.96225	0	221836.8109	1132531.284	435448.5981	393639.8126	532581.203	562019.0158	274604.7459	300252.392	221932.2935	165105.5591	579603.5961	152692.8018	401349.9811	1239998.147	199537.4406	115951.1137	1476302.081	120007.4803	94317.66881
LPA(14:0)	0	0	0	0	0	0	0	0	0	0	0	0	0	346.9782041	0	0	0	0	0	0	0	0	0	0	0	0	0	0	0	0	0	0	0	0	0	0	0	0	0	0	0	0	0	0	0	0	0	0	0
LPA(16:0)	1579.010458	1988.311496	1031.739063	2985.827047	1346.338677	968.0114525	923.7168015	3528.920224	1447.937836	1283.636357	1522.37118	0	2172.350568	1360.832798	3314.521194	2348.277289	952.5938309	648.1414484	0	0	1082.654529	0	0	0	1254.045812	0	1242.7521	2857.354057	2470.079465	1200.866228	893.1810624	4445.065491	0	2886.831953	2624.297796	2184.271828	1494.985955	2989.470928	0	3427.067676	2365.500782	1176.333705	3078.65329	1628.424293	1357.203424	0	2536.557804	1499.217098	2148.903502
LPA(16:1)	0	0	394.3789646	0	0	0	0	0	0	0	0	0	0	0	0	0	0	0	0	0	0	559.072755	0	0	0	0	0	0	0	0	0	0	0	0	0	0	0	0	0	0	0	0	0	0	0	0	0	0	0
LPA(18:0)	850.5085724	0	0	0	0	0	608.7659333	0	0	0	0	0	513.9337174	1131.231715	416.7976039	1020.476524	696.7237589	0	910.3963031	451.0632522	723.4396691	0	0	447.4764213	0	0	622.8373063	1730.079359	0	500.5259903	0	0	0	1234.419791	0	618.5256517	0	0	0	822.4622655	519.4497988	0	0	0	925.7632247	408.6935508	0	0	1190.586849
LPA(18:1)	0	617.0934494	0	0	616.0930074	0	0	0	0	0	0	0	0	0	0	0	0	447.2266462	0	0	0	618.9754852	0	0	617.6258809	0	617.0429158	0	0	0	0	0	0	923.922105	0	0	0	0	0	608.6228891	0	0	0	0	518.2368869	0	638.421802	364.956887	0
LPA(18:2)	0	0	0	0	0	0	495.4890048	0	0	0	0	0	0	0	652.3550491	0	0	0	0	0	0	0	0	0	0	0	594.3785767	0	0	495.7354301	0	0	0	0	495.4181133	0	0	992.0513724	0	0	0	0	0	0	0	0	0	0	0
LPA(18:3)	0	0	0	0	0	0	0	313.5795	0	0	0	0	0	0	0	0	0	0	0	0	0	0	0	0	0	0	0	0	0	0	0	0	0	0	0	0	0	519.1821678	0	0	0	0	0	0	0	0	0	0	0
LPA(20:0)	0	0	0	0	0	0	0	423.0759644	0	0	0	0	0	0	0	0	0	0	0	0	0	0	0	0	0	0	0	0	0	0	0	0	0	0	0	313.5795	0	0	0	0	0	0	0	0	0	0	0	0	0
LPA(20:1)	0	0	0	0	0	0	0	0	0	0	0	423.4278173	0	0	0	0	0	0	0	0	0	0	0	0	0	0	0	0	0	0	0	0	0	0	0	0	0	0	0	0	0	0	0	0	0	0	0	0	0
LPA(20:2)	0	0	0	0	0	0	0	0	0	317.3069394	0	0	0	0	0	0	0	0	0	0	0	0	0	0	0	0	0	0	0	0	0	0	0	0	0	0	0	313.5878789	0	0	0	0	0	0	0	0	0	0	0
LPA(20:3)	0	0	0	0	0	0	0	0	0	0	0	0	0	0	0	0	0	0	396.2952568	0	0	0	0	0	0	0	0	0	0	396.0097368	0	0	0	0	0	0	0	0	0	0	0	0	0	0	0	0	0	0	0
LPA(20:4)	0	0	0	0	0	0	0	0	0	519.4049803	0	0	618.9597266	0	0	0	0	0	0	706.2389714	0	0	0	0	0	0	0	0	0	0	403.1343843	0	414.5283621	0	0	0	0	0	410.4578205	0	0	405.0230564	405.3089517	519.1471845	0	0	0	0	0
LPA(20:5)	0	0	0	0	0	0	0	0	0	0	0	0	317.3060502	0	0	0	0	0	0	0	0	0	0	0	0	0	0	0	0	0	0	0	0	0	0	0	0	0	0	0	0	0	0	0	0	0	0	0	0
LPG(14:0)	0	0	350.1163948	0	580.9003817	0	0	498.7507418	344.6354927	355.6206353	0	0	0	0	0	0	457.0399099	247.6954051	799.3861266	627.8351913	0	0	455.9087752	0	0	352.1030147	479.7255326	0	0	338.4977475	0	0	355.5431269	501.2349221	0	0	378.0196918	0	371.4584515	352.4176891	0	0	376.2654458	0	0	0	335.7735296	349.8805006	475.7264557
LPG(16:0)	2227.408025	1465.267699	3753.008359	2760.215937	2736.574655	2554.088364	779.4692958	1620.121657	4390.541146	1313.004282	2053.744344	529.7353781	930.6513176	2637.831787	4394.446945	2733.491633	9252.879402	8689.164928	2674.755381	948.9613199	2038.946363	2486.582758	0	1166.678033	2720.119291	1296.958917	825.2712959	6705.702291	926.818362	5672.820976	2532.607549	1031.374205	1470.128682	1517.676093	2807.622051	1063.967077	3190.493473	1662.261678	3066.471463	2022.548036	3483.834186	1836.800515	2189.67826	721.0632989	1842.160395	843.1908013	1634.874944	3144.107908	2350.868026
LPG(16:1)	510.1660868	278.9827209	522.9001798	777.6077127	655.9427023	223.3088863	333.7176591	437.3089941	337.4254128	0	354.9936146	327.7159298	779.8750698	445.0707016	403.2898083	0	1736.366038	626.4393529	0	245.2848364	330.8584307	476.0454887	336.8464628	332.8399235	478.9953146	565.3797178	487.6488038	306.2458	556.3522152	425.3179774	588.5233719	0	272.7698263	391.8451236	278.8871631	424.5955937	1057.780776	628.250487	302.1589463	875.8155833	247.3571283	237.8952813	363.3525974	337.6645034	796.4460257	559.3391574	280.3249682	427.8885914	261.2279585
LPG(18:0)	2604.537	4007.465731	3444.198505	3344.575833	6647.028357	4836.124271	4772.950582	2277.256793	4031.498449	5024.088111	3268.931795	3350.700924	4939.220906	5148.961212	3280.427263	4430.130568	8996.841928	3884.320325	2152.50056	3305.310515	3927.205774	4369.020767	1644.526524	2901.87839	3895.716765	2544.821795	3865.127373	3305.390181	1817.867668	3283.081449	6686.623351	2791.273265	3881.793114	5346.641508	4895.792599	4290.05328	9608.725024	4734.305703	3953.706228	4547.432325	4214.003669	7821.648948	7021.268708	4502.684234	3307.692353	3556.253546	2403.875294	2580.608597	3015.097591
LPG(18:1)	6952.691158	8681.142947	9919.883816	20542.87822	23936.25673	17400.05382	8794.628063	20237.97106	7212.725614	11103.50452	22578.09188	9175.968875	15377.6599	16557.27257	11177.5757	15611.71226	16629.68373	11307.13512	8279.789737	15838.19859	14985.40066	9078.233323	10782.14058	14553.99229	22301.6767	9925.660942	25739.25344	23568.46931	9894.520961	13845.59405	21747.3134	12316.24483	20366.53092	16410.46309	14693.06363	15961.28135	34354.15507	9498.329314	25204.35317	28492.11211	20439.88373	24136.0616	17302.97034	10128.4778	13688.04529	15305.29294	25958.92457	16320.10571	7806.191891
LPG(18:2)	4824.299377	9907.494788	2971.88358	11002.2408	11722.20872	7116.935652	5520.538307	9324.884881	9030.956711	9658.184611	5548.071332	4568.706938	8994.467376	9833.148197	7296.568584	5284.137188	5975.067147	11164.664	8162.61076	7380.292829	7632.166911	5925.386513	6414.532081	5935.563902	10338.30583	2247.678341	9683.982312	9829.735855	5295.823969	5933.233089	6093.245868	5637.700969	11310.10886	10581.20896	5066.247815	9475.736783	4103.511351	4554.23377	11508.75662	9671.74927	10170.33145	10311.06888	18043.56362	3298.77871	8847.233018	6951.681525	4884.999778	5883.644395	2336.969084
LPG(18:3)	882.3798948	625.9228322	0	1113.517999	491.5892917	369.7905604	0	241.3077208	802.6039916	1333.141077	214.4650216	229.0759875	611.2207208	0	685.0217208	514.0983587	1116.057156	488.5980143	412.6490287	1035.881486	440.4479425	301.5665874	398.4009844	0	0	0	1003.231993	867.8405139	1004.747625	0	0	801.1554739	249.4164912	1075.240643	1027.691556	646.0805555	238.5864035	546.1494094	861.9399935	489.2863446	2276.410317	1683.893817	1826.843022	485.4639752	430.4501607	409.7125589	637.2243612	559.891598	828.9951832
LPG(20:0)	462.5522072	285.1968197	0	257.0053427	171.9490707	0	412.7870541	374.6891909	463.1468341	287.2408992	310.9359195	0	0	571.8893316	604.448051	0	545.7795504	827.1647155	461.4058872	0	425.8920204	431.9393359	261.8585686	0	396.8328759	288.1063245	393.4765787	465.4361803	188.6240601	526.8690265	292.306495	0	0	283.1624127	706.7034162	0	0	0	286.1445727	276.4567122	500.1688421	414.8802468	0	0	171.1230398	285.1664876	0	0	307.3885883
LPG(20:1)	912.3390586	0	0	0	0	0	0	0	0	1015.601185	0	0	0	0	799.267336	0	288.0116916	311.4220692	817.1109695	0	0	0	0	0	0	0	1046.490887	0	0	394.3015853	0	0	0	0	0	0	0	0	0	1043.906255	0	0	0	0	983.2675592	0	0	0	0
LPG(20:2)	949.0672959	777.8100789	1126.887421	2204.009302	449.3693148	261.422232	273.155761	545.8543214	1397.723155	723.564997	567.6663821	1003.758142	884.057891	843.1827692	530.3375134	1028.23149	952.2267279	897.393397	769.886229	843.5616647	424.5511422	0	0	0	1155.301073	122.0843356	504.9098202	741.4940257	856.4123837	0	737.3986955	1575.182365	860.2697924	1122.949482	590.4118902	939.947037	1057.745036	0	0	1404.270105	1801.828843	1206.29178	1434.397192	1278.668617	910.8251862	1273.542997	845.9723811	0	2184.884019
LPG(20:3)	824.6746466	1119.774779	698.1411279	1234.503734	1050.453461	0	0	0	1004.511474	405.5549852	290.7132644	382.7799287	239.5181583	538.0850064	686.3834721	0	679.3907825	957.4267889	664.3475913	625.8530512	211.7022021	689.8532012	871.5954258	633.0142485	0	0	730.1921926	573.1870866	494.367699	1195.192988	213.1055703	505.9806914	366.8410145	835.4344636	282.4826337	844.6500961	508.2525383	0	973.9891433	245.9429002	594.340261	810.9383602	763.4683892	0	791.9640738	0	625.8953736	268.5212019	291.546461
LPG(20:4)	337.6625663	869.4059047	610.364353	1436.419767	0	503.4875886	563.5091296	2115.422537	0	0	391.6583418	247.8960445	597.2510724	774.7743183	838.5002901	551.5851696	0	978.1606728	441.7376611	565.9975949	0	0	0	414.9047024	679.8517081	322.2722343	549.2584118	336.4220252	0	0	963.4539252	513.3991934	611.537038	365.8114215	453.9143147	675.6236462	774.244489	0	609.4478422	1100.108338	1113.920679	826.2025499	627.8665199	713.2215847	1365.631947	320.6003931	354.6000639	450.8271552	782.567232
LPG(20:5)	400.1014318	309.3015701	266.03348	320.6086797	1131.644594	266.2923257	482.803532	0	686.4655908	393.0232524	257.4489761	1161.291219	396.6417856	619.2007705	417.4012511	271.1211234	989.4021201	570.5786956	779.8868971	298.2835662	444.5330977	230.3855135	381.3255772	363.5383564	313.6839277	791.2533718	299.1189802	253.1354759	405.2773067	383.050464	277.0645759	0	0	320.407622	490.9134501	805.2282497	634.0106911	571.4524172	658.5345042	0	481.8755806	329.333832	591.3200117	642.721316	435.3787761	713.2799188	622.4886979	692.4439228	0
LPG(22:4)	259.944904	721.9117072	315.1756426	973.5211512	674.5234627	416.6975846	428.8220793	997.8253309	625.840755	512.5347246	371.8386611	556.0684894	0	636.3047436	649.4939287	506.416205	346.1313164	329.8531247	773.2186891	0	163.402894	270.5265085	449.4182876	791.0974762	0	423.3795147	518.9446699	0	574.999238	386.7837462	223.0367532	918.4372512	0	532.5020209	580.6272795	472.5643249	0	222.5000302	406.4704757	748.2461468	320.2738422	383.3872182	620.8093658	547.1264717	872.9329774	211.5448531	456.449808	1364.613929	284.6242086
LPG(22:5)	660.2809071	867.957163	1664.969647	536.0046293	0	716.2354326	658.1219008	739.0659786	674.6120003	612.1054859	335.3665681	799.74392	765.0599951	798.8432771	553.3158373	432.9089152	724.0477354	362.6593397	484.0145325	392.8228251	592.3142306	424.1963943	267.4195384	0	411.944957	0	1168.017839	717.5967896	402.4802941	0	822.9247021	285.5792261	0	709.3656685	1331.529964	368.0999959	1294.47663	0	801.5450858	911.4132431	752.2510853	664.829931	1650.388364	522.8336846	620.7270756	669.3847401	378.1668308	553.4169061	288.4840104
LPG(22:6)	346.0955816	352.3121943	704.1225465	349.3091769	518.2815887	1046.309113	351.8032521	477.6103566	0	901.4574183	714.9242419	0	471.9652632	474.0265055	488.4715735	496.4183239	842.878387	0	595.3108233	450.7247414	0	390.1935988	275.2612939	378.4466965	383.0903147	735.1879441	390.0377523	487.776324	416.5877857	0	0	584.6850452	0	0	582.6507276	512.8731467	775.6149044	622.6765531	637.1857019	380.3789931	2192.238391	0	595.6567452	0	647.0384836	515.5999839	606.3908515	350.9216861	0
LPI(14:0)	0	0	0	0	0	0	0	0	0	0	0	0	0	0	0	0	0	0	0	0	0	0	0	0	0	0	0	0	0	0	0	0	0	0	0	0	0	0	0	0	0	0	0	0	0	0	0	0	0
LPI(16:0)	665.3360729	0	0	0	0	0	0	0	0	0	0	0	0	0	0	497.2475869	1980.688254	562.756597	1775.645241	0	0	0	0	0	0	0	0	962.4176426	0	1348.366349	0	0	0	0	0	0	0	0	0	0	0	0	0	0	0	0	0	730.1783446	884.2537106
LPI(16:1)	0	0	0	315.5782473	0	0	0	0	0	0	0	0	0	0	0	0	0	0	0	0	0	0	0	0	0	0	0	0	0	0	476.7713719	0	0	0	0	0	0	0	0	0	0	0	0	0	0	0	0	0	0
LPI(18:0)	0	0	0	0	0	0	0	0	0	0	0	0	0	0	0	0	0	0	0	0	0	0	0	0	0	0	0	0	0	0	0	702.7269086	0	0	0	0	0	0	0	0	0	0	0	0	0	0	0	0	0
LPI(18:1)	0	0	0	415.0284636	0	0	0	0	0	0	0	0	0	0	0	0	0	0	0	0	0	0	0	0	0	0	0	0	0	0	0	0	0	0	0	0	499.7782283	0	0	0	0	0	0	0	0	0	0	683.4546378	1028.877307
LPI(18:2)	0	0	0	0	0	0	0	0	0	0	0	0	0	0	441.9290532	0	0	580.8714023	417.4027363	0	0	0	0	0	0	0	0	0	0	0	0	0	0	0	0	0	0	0	0	0	0	0	0	0	0	0	0	0	706.9645423
LPI(18:3)	0	0	0	0	0	0	0	0	0	0	0	0	0	0	0	0	0	0	0	408.8573965	0	0	0	0	0	0	0	0	0	395.2666538	512.1898416	0	0	0	0	0	0	0	0	0	0	0	0	0	0	0	0	0	0
LPI(20:0)	0	0	0	0	0	0	0	0	0	0	0	0	0	0	0	0	0	306.7712411	409.1047006	0	0	0	0	0	0	0	0	0	0	409.032	0	0	0	0	0	0	0	0	0	0	0	0	0	0	409.1944214	0	0	0	0
LPI(20:1)	0	0	0	0	0	0	0	0	0	0	0	0	0	0	0	0	0	0	0	0	0	0	0	0	0	0	0	0	0	306.6096058	0	0	0	0	0	0	0	0	0	0	0	0	405.1539801	0	0	0	0	0	0
LPI(20:2)	0	0	0	0	0	0	0	0	0	0	0	0	0	0	0	0	817.8084462	0	0	0	0	0	0	0	0	0	0	0	0	0	0	0	0	0	0	0	0	0	0	0	0	0	0	0	0	0	0	0	0
LPI(20:3)	0	0	0	0	0	0	0	0	0	0	0	0	0	0	0	0	309.8387688	0	614.7329352	0	0	0	0	0	0	0	0	0	0	0	0	0	0	0	0	0	0	0	0	0	0	0	0	0	0	0	392.3600142	0	0
LPI(20:4)	0	0	0	0	0	0	0	0	0	0	0	0	0	0	0	0	0	0	0	0	0	0	0	0	0	0	0	0	0	0	0	0	0	0	0	0	0	0	0	0	0	0	0	0	0	0	0	0	0
LPI(20:5)	0	0	0	0	0	482.3960283	0	0	0	0	0	0	0	0	0	682.4188126	0	0	0	0	0	0	0	0	0	0	0	0	0	0	0	574.5707202	0	0	0	0	0	0	0	0	0	0	0	0	0	0	0	0	0
LPI(22:4)	0	0	0	0	0	0	0	0	0	0	0	0	0	0	0	0	0	0	0	0	0	0	0	0	0	0	0	0	0	0	0	0	0	0	0	0	0	0	0	0	0	0	0	0	0	0	0	0	0
LPI(22:5)	0	0	0	0	0	0	0	0	0	0	0	0	0	0	0	0	0	0	307.6313923	0	0	0	0	0	0	0	0	0	0	0	0	0	0	0	0	0	0	0	0	0	0	0	0	0	0	0	0	0	0
LPI(22:6)	0	0	0	0	0	0	0	0	0	0	0	317.2188118	0	0	0	0	0	0	0	0	0	0	0	0	0	0	0	0	0	0	0	0	0	0	0	0	0	0	0	0	0	0	0	0	0	0	0	0	0
LPS(14:0)	0	0	0	0	0	0	0	0	0	0	0	0	470.3730907	0	0	0	907.7767036	500.0508348	0	0	0	0	0	0	0	0	0	0	0	400.66	0	0	0	0	0	0	0	0	0	0	0	0	0	0	0	0	394.8201352	0	0
LPS(16:0)	1386.020513	1733.815121	918.4469855	1752.46992	2552.195616	1795.483425	2265.295557	2079.930826	2188.300868	1881.332604	1653.531545	0	1278.680881	1668.496779	2475.849286	1297.969536	0	420.0121005	0	0	0	1060.461971	0	1065.581988	1405.214812	1413.90427	1389.634844	3632.036386	1268.285109	437.787534	2043.140525	3028.291119	965.7712875	1705.361574	2640.381727	2462.690446	2104.933064	3490.051495	0	2796.540646	2920.977481	790.4292148	2227.243361	1046.614898	2205.783433	1099.915282	2572.462986	2728.911694	1756.306533
LPS(16:1)	0	0	0	0	0	0	0	0	0	0	0	0	0	0	0	0	0	0	0	0	0	0	0	0	0	0	688.364113	0	0	0	0	0	0	0	0	0	0	0	0	0	0	0	0	0	0	0	0	0	0
LPS(18:0)	688.4925342	0	0	831.2231973	1032.024483	687.8529531	1352.022223	525.7138251	491.0063	630.7180301	0	0	935.1674644	0	1278.209277	0	0	680.7746975	0	0	0	929.8285212	0	0	1155.041268	0	841.0585816	0	833.49	1130.64324	777.4332641	586.36074	0	1247.015468	0	0	1039.036175	0	0	0	433.3213284	519.4173885	1044.559808	314.2749489	0	0	972.0802274	930.404091	586.6862523
LPS(18:1)	0	908.9340632	0	0	697.0806264	985.2509829	0	505.8167742	0	0	0	0	1044.927358	0	982.093394	0	568.8839508	0	382.7062018	0	0	814.2254784	0	0	0	0	811.4470863	0	0	0	917.6838415	0	0	0	0	0	912.7166254	404.5157552	0	0	0	0	0	0	0	0	0	0	0
LPS(18:2)	0	0	0	0	641.3788252	0	0	0	0	0	0	0	1282.088057	0	0	768.9460931	341.5402268	0	0	0	371.3582044	555.0777839	0	0	457.6883488	0	1831.978756	1060.406975	0	0	0	0	0	0	0	0	549.2341875	1645.032511	0	915.5349571	0	0	1190.486599	0	0	0	1533.081025	0	1147.214813
LPS(18:3)	0	0	0	0	0	0	0	0	0	0	0	0	0	0	0	0	0	0	0	0	0	0	0	0	0	0	0	0	0	0	0	0	0	0	0	0	0	0	0	0	0	361.8625507	0	0	458.3084994	0	0	0	479.8555735
LPS(20:0)	0	0	0	0	0	0	0	0	0	0	0	0	0	0	0	0	406.4765557	0	0	0	0	0	0	0	0	0	0	0	0	0	0	0	0	0	0	0	0	0	0	0	0	0	0	0	0	0	0	0	0
LPS(20:1)	0	0	0	0	0	0	0	0	0	0	0	0	0	0	0	0	0	0	0	0	0	410.5480855	0	0	0	0	0	0	0	0	0	0	0	0	0	0	0	0	0	0	0	0	0	0	0	0	0	0	0
LPS(20:2)	0	0	0	0	0	0	0	0	0	0	0	0	0	0	0	0	0	0	0	0	0	0	0	0	0	0	0	0	0	0	0	0	0	0	0	0	0	0	0	0	0	0	0	0	0	0	0	0	0
LPS(20:3)	0	0	0	0	0	0	0	0	0	0	0	0	0	0	0	0	0	0	0	0	0	0	0	0	0	0	0	0	0	508.284326	0	0	0	0	0	0	0	0	0	0	0	0	0	0	0	0	0	0	0
LPS(20:4)	0	0	0	0	0	0	0	0	0	0	0	0	0	0	0	0	0	0	0	0	0	0	0	0	0	0	0	0	0	0	0	0	0	0	0	0	0	0	0	0	0	0	460.7010204	0	0	0	0	0	0
LPS(20:5)	0	0	0	0	0	0	0	0	0	0	0	0	0	0	0	0	0	0	0	0	0	0	0	0	0	0	0	0	0	406.8512104	0	0	0	0	0	0	0	0	0	0	314.8581128	0	0	0	0	0	0	0	0
LPS(22:4)	0	0	0	0	0	0	0	0	0	0	0	0	0	0	0	0	0	315.8449346	0	0	0	0	0	0	423.8634493	0	0	0	0	0	0	0	0	0	0	0	0	0	314.198	0	0	0	0	0	0	0	0	0	0
LPS(22:5)	0	0	0	0	0	0	0	0	0	0	0	0	0	0	0	0	0	0	0	0	0	0	0	0	0	0	0	0	0	0	0	0	0	0	0	0	0	0	0	0	0	0	0	0	0	0	0	0	0
LPS(22:6)	0	0	0	0	0	0	0	0	0	0	0	0	0	0	0	0	305.0405724	0	0	0	0	0	0	0	0	0	0	0	0	0	0	0	0	0	0	0	0	0	0	0	0	0	0	0	0	0	0	0	0
PA(14:0/14:0)	0	0	0	0	0	0	0	0	1034.726234	0	0	0	1044.906285	0	0	0	0	0	0	0	0	0	0	0	1011.855596	0	0	0	0	1630.091797	0	0	0	1526.441278	0	0	0	0	0	0	0	0	0	0	0	1010.168657	0	0	0
PA(14:0/18:1)	0	0	0	0	1388.645208	0	1174.596308	0	0	0	2031.779583	0	0	1000.749828	0	0	0	0	1575.503478	0	0	0	0	0	0	1025.177882	1517.916611	1013.790768	0	545.761667	0	0	0	0	0	1045.043642	0	0	0	988.3549266	1027.983877	0	0	0	0	0	1048.824539	0	0
PA(14:0/18:2)	0	0	0	1371.638556	0	0	0	0	0	0	0	0	477.8272193	1083.897504	0	0	0	0	1058.364158	0	0	0	0	0	0	0	379.304033	0	212.7738383	1072.95962	0	0	0	562.5258616	0	530.9928738	1007.5678	0	0	0	0	0	0	0	0	0	0	0	481.4231881
PA(14:0/18:3)	0	0	0	811.1268555	245.9259527	225.1929041	333.6101781	0	391.0951663	0	519.6451838	577.3906759	0	769.9908593	291.5449389	340.4359675	0	0	1057.087675	0	489.4135597	0	0	0	497.5365556	280.5816978	907.8903678	0	0	0	0	321.94989	0	0	0	0	0	0	0	247.2386985	0	361.0360413	229.7021801	434.938213	370.5654014	0	0	0	0
PA(14:0/20:1)	0	0	0	490.6931123	230.3467078	333.1473505	0	0	0	0	0	0	0	512.2384126	0	630.26193	0	0	0	0	0	0	0	0	0	0	0	0	0	1085.37264	1472.406328	0	0	0	0	0	0	377.1816468	0	0	0	234.1259402	0	0	0	0	0	333.4086045	562.7242364
PA(14:0/20:2)	0	0	0	915.6609473	1051.554158	0	0	0	0	0	0	0	0	0	0	0	0	1046.328209	1085.453753	0	0	0	0	0	0	1533.791661	0	1044.170663	0	943.7154861	561.4632631	0	0	0	0	0	0	0	0	0	0	0	0	0	0	0	0	0	0
PA(14:0/20:3)	0	0	935.1082435	0	0	0	2070.348521	0	0	0	0	0	0	0	0	0	0	0	0	0	0	0	0	0	0	0	0	881.2356513	0	0	0	0	0	937.8471335	0	0	0	0	0	0	0	0	0	0	0	0	1049.346877	0	0
PA(14:0/20:4)	0	0	0	0	0	0	0	1036.189342	0	0	0	0	0	0	972.2731709	0	0	0	0	0	0	0	0	0	0	0	0	0	0	1045.215487	0	0	0	0	1579.398377	0	0	0	1045.976253	0	0	0	1044.973362	0	0	0	0	0	0
PA(14:0/20:5)	0	0	0	0	843.9442707	0	0	0	0	0	1568.200398	0	0	0	0	0	0	0	0	0	0	0	0	0	0	704.6099914	0	816.2007228	0	0	0	0	0	0	0	0	0	0	0	0	0	0	0	0	1578.580305	477.7479549	0	318.385395	580.173907
PA(14:0/22:4)	0	0	0	0	0	0	0	0	0	0	0	0	0	0	0	0	0	0	0	0	0	0	0	0	0	0	0	0	0	0	0	0	0	1036.166524	0	0	0	892.4038665	0	0	1556.106468	0	0	0	0	0	0	0	0
PA(14:0/22:5)	0	0	0	0	0	0	869.386473	0	1128.894657	370.5353004	0	0	0	243.1804413	0	0	1083.188831	0	0	0	0	949.4975042	0	0	0	504.4987568	387.9350226	0	960.0595156	0	216.4303212	0	0	0	0	1506.080003	0	0	0	0	0	0	0	0	600.4838799	0	0	0	247.0226135
PA(14:0/22:6)	0	727.2440269	707.2226464	1037.251558	0	0	0	0	0	0	0	0	0	0	0	1189.629734	0	1094.251692	0	0	0	0	0	0	0	0	0	0	0	0	0	0	0	0	0	0	0	1053.522899	0	0	0	0	0	0	0	0	0	0	0
PA(16:0/14:0)	0	0	0	0	0	0	0	0	0	0	0	0	0	0	1447.927169	987.6543145	1611.665105	1600.988464	0	0	0	0	0	0	0	0	0	0	0	0	1242.046883	987.5945817	0	0	0	0	0	0	0	0	0	0	0	0	0	0	0	0	0
PA(16:0/16:0)	0	0	2510.257127	0	0	0	0	1542.896675	967.3255314	0	0	0	0	1598.111055	0	2056.910337	0	2102.131502	2708.17818	0	0	0	0	0	0	0	1553.480901	0	1000.556232	1079.438652	0	1002.194032	1286.630595	0	0	0	0	0	0	1269.365792	0	0	0	0	2051.548139	0	999.3602218	1003.592805	3017.84372
PA(16:0/16:1)	0	0	1491.083072	0	0	0	0	0	0	0	0	0	0	0	0	0	0	0	0	0	0	0	1149.572258	1264.223478	0	0	1102.894179	0	0	0	0	0	0	0	0	0	0	0	0	0	0	0	0	0	0	0	0	0	0
PA(16:0/18:0)	2505.2552	0	0	0	0	0	0	0	0	0	0	0	0	0	0	0	2629.045422	1365.7484	1565.437125	0	0	0	0	0	0	1004.644801	0	0	0	1071.34336	0	0	0	0	0	0	0	0	0	0	0	0	0	1009.704412	0	0	0	0	930.7869612
PA(16:0/18:1)	0	5015.481713	0	0	854.8957736	655.5502061	1068.432302	6260.34664	0	0	0	1147.719962	0	0	0	5660.615481	1024.50223	3647.587097	2096.242035	2061.292853	1169.01842	0	0	1166.07756	3075.627892	872.6271785	1148.313818	0	1181.788216	0	1661.701541	9646.351398	0	992.5320637	4383.594912	9806.553303	0	3454.341901	0	834.3864234	4020.799338	1056.58469	1440.251772	2020.604605	0	0	9264.686548	0	0
PA(16:0/18:2)	1573.492116	0	1534.859451	0	0	1324.112263	0	1041.039275	0	1572.744417	0	1087.919329	1412.724357	1018.629848	0	0	1500.467947	0	1629.863959	1551.041993	0	0	0	0	1009.935442	0	0	1004.697394	1488.370166	0	999.3418112	0	0	0	1551.913481	942.2403587	1047.414821	1527.210334	1041.730337	0	0	0	0	0	1564.517714	0	0	0	1515.959693
PA(16:0/18:3)	0	0	0	0	0	0	0	0	0	0	0	1172.027547	0	0	0	988.5665436	0	0	0	0	0	0	0	0	0	0	0	0	0	0	1278.03529	0	0	0	0	0	0	0	0	0	0	0	1055.90788	1072.156513	1574.422001	0	0	0	0
PA(16:0/20:1)	0	0	0	0	0	0	1303.427995	0	0	0	0	0	0	0	0	0	0	0	0	0	0	0	0	0	0	0	0	0	0	0	937.1307246	0	0	0	0	0	0	0	0	0	0	0	0	0	0	0	0	0	0
PA(16:0/20:2)	1030.313871	0	0	969.5387359	0	0	0	0	0	0	0	0	0	0	0	0	0	0	0	0	0	0	0	0	0	0	0	0	0	0	0	0	0	0	0	0	0	0	0	2042.279871	0	0	0	0	0	0	0	0	0
PA(16:0/20:3)	0	1004.438843	0	0	0	0	0	1042.952979	0	0	0	0	0	0	868.927421	0	0	0	1075.214731	0	0	0	0	0	0	0	0	0	0	0	0	0	0	0	0	0	0	0	0	0	0	0	0	0	1047.278737	0	0	0	0
PA(16:0/20:4)	0	0	0	0	0	868.1827439	1568.936376	0	0	0	0	0	1051.730457	0	0	0	0	3132.190413	1065.647653	0	0	0	0	0	1560.097559	1576.418413	0	562.1808215	1358.262448	1041.897981	0	0	0	0	1054.10551	0	0	0	0	0	1018.95569	0	1419.451817	0	1035.23242	0	0	0	0
PA(16:0/20:5)	0	1567.453187	0	0	0	0	0	1044.847949	0	0	0	0	0	0	0	1047.143561	1068.961012	0	0	0	0	0	0	0	0	0	0	0	0	0	1003.443394	0	0	0	0	0	1019.950409	0	0	1053.259437	0	0	1001.355347	0	0	0	0	1039.655804	1544.484767
PA(16:0/22:4)	0	1054.408396	0	0	0	0	0	0	0	0	0	0	0	0	0	0	1094.331172	0	0	0	1058.52125	1039.581935	0	0	0	0	0	0	0	0	0	0	0	0	0	0	0	0	1054.213511	1196.522324	0	0	0	0	855.6357307	0	0	0	0
PA(16:0/22:5)	0	0	0	0	0	1566.364135	0	0	0	0	0	0	0	1053.52509	0	0	0	0	0	0	0	0	0	0	1035.47959	0	0	0	0	1562.996121	0	912.2598844	0	0	0	0	0	0	0	1042.980198	0	0	0	0	0	0	0	0	0
PA(16:0/22:6)	0	0	0	0	0	0	0	1563.080206	0	1040.438401	0	0	0	0	1037.58566	0	0	0	0	0	0	0	0	0	0	0	0	0	0	1042.72861	0	1572.868432	0	0	0	0	0	0	0	0	0	0	0	1053.938413	0	0	0	0	0
PA(18:0/14:0)	0	0	0	0	0	0	1020.21817	0	0	0	0	0	1053.443701	0	0	0	0	0	0	0	0	0	0	0	0	0	0	0	0	0	0	0	0	0	0	0	0	0	0	0	0	0	0	0	0	0	0	0	0
PA(18:0/16:1)	1540.923358	2578.627714	3059.807143	1893.335526	5269.869813	2561.526312	4847.946885	4784.758903	8193.669733	3016.022682	4112.189176	6547.637043	1520.261746	4552.396101	3949.393576	1840.557215	4695.295566	1047.334268	2097.203292	0	0	0	3435.153125	2492.78982	2019.1708	1018.572607	2019.508663	1511.989921	1494.700528	1558.834448	1495.660573	1540.106836	1010.271441	2532.071526	5063.67498	2020.310091	5937.858499	5566.617704	3028.995903	3508.102364	5383.703907	3136.065275	1518.368699	2524.927703	2077.276642	2526.079218	1533.356787	477.1716753	1518.033297
PA(18:0/18:0)	2055.7673	3295.835432	3605.005843	4508.043109	1511.08743	2123.867038	4627.979182	3811.246828	1513.637304	4072.619237	1543.940778	2025.178034	3806.658067	2020.903138	4640.456416	0	3125.092865	1007.987274	490.7524673	2465.006117	0	0	3491.506868	2000.24584	2028.30527	0	8638.449041	2562.984627	1471.58986	0	0	1926.485253	0	2529.632795	5054.094922	5214.476293	1303.98703	3498.477369	0	1368.46304	4098.21848	2286.45248	1977.797912	2544.498349	1428.718679	1561.380792	2065.400239	1485.609803	2056.625083
PA(18:0/18:1)	48843.63835	101499.3156	104376.2575	163997.6473	100705.6923	132333.168	247245.3365	177230.4623	87675.91015	118678.1172	70509.49798	85787.53294	109022.6944	66872.65157	159875.543	85025.5219	122057.6159	162252.9846	80950.25439	62551.64444	37408.887	38307.22805	61052.81775	69485.1712	105336.2086	52062.63917	158146.7295	84276.40173	104020.8956	66361.2906	70085.91112	72927.79732	51762.03767	111740.8111	180692.3147	126467.2931	140900.0001	198661.1543	55167.8497	107055.4694	180089.1795	92792.56911	130726.7914	45470.82578	76642.43948	108143.3418	77379.20649	59037.69493	74208.54931
PA(18:0/18:2)	162764.2432	167042.6052	140689.0223	375177.471	147452.8616	191715.2316	488962.2585	454834.9815	168603.2187	354000.7106	34543.53282	198995.824	309374.3513	102400.9343	446328.9174	146153.6806	252702.7276	474200.0008	173384.5336	159339.3159	66017.23738	95420.65261	47652.79069	80888.8748	179997.0368	147931.1179	422784.1672	337718.2146	342892.732	131837.939	146682.9614	185993.9549	71444.03167	271085.8233	295618.6188	150967.4624	237023.4952	486398.124	109568.8114	144833.062	470277.0672	99191.44111	546572.0448	46985.09706	139520.5808	278753.648	146895.0577	111424.0297	244178.588
PA(18:0/18:3)	1838.561609	4299.078547	2212.927346	6577.863716	2526.526477	3603.34706	5873.997785	5046.916541	2538.855375	1012.20718	0	1008.948964	2632.793372	1008.763642	7353.080184	0	5793.363179	2796.947084	4198.376396	2998.547103	0	4291.014423	1992.998751	1994.01986	2037.234222	1491.129826	3033.586017	9667.869728	4483.550717	948.9914573	1494.994269	1004.60036	0	4041.905208	2502.250684	3530.542288	2020.783138	3527.946016	1028.063097	0	7593.547538	0	8614.981137	0	4485.386253	3605.98837	0	0	1542.637142
PA(18:0/20:0)	1408.353174	0	2581.312698	3046.879703	7425.180941	3102.913513	3881.502909	0	3027.464675	0	0	0	2360.235592	1529.21461	2878.51377	2068.65942	3946.927688	8055.016443	1950.984275	0	1015.304531	0	0	1042.113971	3530.889846	1533.284085	5753.783872	3973.775781	2381.549362	1457.526895	3093.494186	0	1027.737329	2667.861773	921.287111	1689.651032	2981.03287	3014.422452	1529.484025	3937.1275	7180.474778	5018.518363	5924.684258	1529.920947	923.7783944	1529.035664	1037.159087	3561.677518	0
PA(18:0/20:1)	0	6115.563421	1768.201354	5082.701387	0	4124.230158	4386.367337	5105.658177	924.1575404	2548.100549	2575.590228	6736.318943	2309.767051	1523.132579	8248.342771	4141.926308	3136.392727	5750.941552	5750.570022	4517.071322	2008.525425	2504.746657	0	1008.370921	2063.541165	1521.876561	2062.349014	0	2044.4426	1041.531294	2512.586571	1551.627553	1022.578285	4888.126548	2544.887524	3571.614863	3522.330579	3527.882546	3060.294763	2528.013725	2557.586604	2423.198636	3061.202082	2384.317869	2541.970428	1033.278509	2587.163749	1028.922676	2564.516632
PA(18:0/20:2)	1549.453721	6111.115249	1934.112895	1476.75217	1976.333285	2552.621742	6580.445713	14789.40599	3983.517005	7208.464143	0	1436.655661	1321.031184	2033.486382	5492.931798	4652.495575	1444.010697	4312.218783	2611.063536	1495.095728	995.1683725	1006.028431	2557.94175	2505.764265	3600.029749	2018.985411	5640.223116	2556.714257	10145.95144	1536.730494	2506.054916	4647.884313	3091.633969	3013.153058	5234.076035	1868.946595	4213.057507	7657.855019	0	1283.206607	9707.30127	4064.411075	2318.79736	0	4807.752184	3560.461289	1033.474838	2056.309081	1886.67139
PA(18:0/20:3)	31568.25788	89810.16787	57503.40315	92583.41953	35128.07708	73465.22424	129656.5746	137138.5927	68653.27642	83808.93797	11951.65044	50310.99482	48940.39527	38136.8043	95788.60786	40780.93036	118619.6255	81950.0335	38617.46826	42954.05453	27204.73289	20400.93189	25527.16573	24147.38543	53760.06255	22503.30709	76554.19505	43284.70169	107098.5873	44165.47482	41916.58491	52863.23709	18152.66397	69450.78088	100353.9197	62349.0782	63644.19366	125192.2955	33473.35274	56892.87163	99657.01127	53664.49543	83723.72077	18579.98957	36563.12611	75917.28466	30762.4618	27310.64089	60670.61146
PA(18:0/20:4)	258681.9966	728155.4345	607696.3952	915418.7654	412743.3613	740071.6524	1458900.082	1194936.803	861050.5763	593667.3306	440073.9407	525774.7513	636092.4809	479528.6838	1007453.411	281409.5273	810759.5842	757005.1542	409704.5722	522879.432	267814.7936	275281.7425	373353.3595	433539.6432	694951.4012	253126.6524	657045.1882	576233.2562	666847.9484	673128.0812	397093.0118	544854.0557	163792.1632	568061.261	941778.0706	793151.3108	634421.1254	1085085.376	268517.36	633694.941	979168.5806	644133.4578	601149.8399	204271.3591	381666.0378	637964.1742	363223.0815	236001.5942	669324.3663
PA(18:0/20:5)	8810.905135	21875.21288	11941.82896	11889.21341	6708.499908	10379.67631	21689.87603	36439.93576	26451.42339	23431.5943	0	18227.07266	5732.172873	12409.47503	5046.493874	9345.254958	22721.22959	6251.146579	6489.582122	8213.472118	5146.18366	2053.613423	1013.548519	2570.067858	6749.486705	3829.670953	15952.89241	14463.22573	8702.507012	4539.766337	18386.62278	23552.46647	0	7241.381007	14567.43934	8846.126987	8294.051394	14039.97255	2605.311618	7261.684548	57248.10286	4670.147075	10243.24539	2602.405688	16424.35517	2083.466921	10152.56965	6193.051074	8991.156262
PA(18:0/22:4)	55572.83364	171359.749	238234.0372	290348.5859	117102.9843	220913.8991	304803.9589	271333.957	98852.13398	117742.5869	238934.5818	58628.19073	148432.6331	91577.78382	292666.0231	72803.21685	124036.2412	221693.2129	128395.9692	117412.1263	66486.42917	56245.7516	136111.7432	174579.3912	176753.6131	37231.29916	92554.56486	52408.14984	91150.21	169151.4541	71555.89952	86805.95693	37213.44633	127007.5907	401481.2344	306563.0055	164329.3002	235160.2093	67662.15452	109227.682	204336.3147	257832.8598	96774.41436	59340.13992	78803.35737	194799.4831	83625.32735	71440.34579	170107.3521
PA(18:0/22:5)	51815.10998	122144.7532	75462.48091	181389.2585	73739.42623	100810.6008	179403.8105	186766.5766	142277.579	108707.3407	53226.55595	74492.01202	102073.8395	61768.39571	185923.2596	66560.64509	150391.9135	159155.0633	67774.79986	73970.80078	46022.05858	32932.68267	50607.27126	68367.21634	77896.79758	41934.39599	82894.29071	71900.1168	73416.21672	99100.92558	64320.24362	82762.05241	21885.79551	84505.80914	188551.5816	114396.2459	98117.10347	159001.4123	44718.3595	122398.462	193104.1942	82143.07005	104565.6954	21068.2817	81815.5253	54888.71967	83403.6915	48035.64118	79324.32292
PA(18:0/22:6)	20791.81806	68907.0487	57545.57462	68294.81118	41701.84865	60850.14697	100396.3853	69133.45387	81758.55212	77174.33153	28602.06878	38199.35087	68971.93987	54371.78325	36321.84745	51428.85842	80468.2124	47572.95179	27182.35328	50855.60991	45880.0457	33200.30987	16641.95668	24503.98262	66729.09237	19823.43624	74589.41955	46658.43426	51427.06015	25595.11853	59396.47317	61821.53653	14477.93365	57964.0677	62792.20518	60913.78614	83883.36556	109374.6713	12467.31396	90046.71077	116030.8853	56810.35058	63703.55244	36500.99449	69774.31707	15117.73335	60008.6378	33141.90914	51543.82744
PA(18:1/16:1)	0	0	0	0	0	1030.132308	1099.086776	1115.269809	0	0	1048.218856	0	0	0	0	0	1128.755076	0	0	0	0	0	0	0	1010.237097	0	0	0	0	0	0	0	0	1065.705651	0	1542.738849	0	0	0	0	0	0	0	0	1036.717785	0	0	0	0
PA(18:1/18:1)	1544.544996	2028.142243	1006.295803	1745.100746	0	3585.988215	4887.495111	0	0	1690.851946	0	1020.152768	3905.611421	1515.268062	0	1523.936769	0	1462.867596	1873.625512	0	0	0	0	0	2336.665144	0	1544.970559	2557.439213	1496.961333	0	1528.055685	1549.421389	1505.947449	0	3530.155966	0	943.2870495	1513.42934	2023.923858	3035.663432	1420.647285	0	5792.688677	0	1514.817957	0	1543.492429	1885.971369	0
PA(18:1/18:2)	1068.689215	3533.255087	0	3518.107303	0	3081.746661	7077.999276	7089.327762	3083.372049	2540.363605	0	2534.462595	912.6355088	3530.317116	2921.601687	0	1567.410385	3157.293468	2591.918606	1495.481379	0	994.9747562	1042.038617	0	1009.705326	3024.42932	5581.839198	2532.519058	0	1045.620441	1493.454783	0	0	0	3158.477993	0	1010.584442	2526.034685	0	5064.001325	4562.097685	0	4508.022475	0	2525.894543	2018.374777	1547.31452	0	1007.970309
PA(18:1/18:3)	0	0	0	1005.919391	0	0	0	1519.620957	0	0	0	0	0	0	0	439.9590259	0	0	0	403.4327465	0	0	0	0	0	0	0	0	0	0	0	0	0	1036.166524	0	0	0	0	0	0	0	0	0	0	0	0	0	0	0
PA(18:1/20:1)	0	1520.069195	0	0	0	0	0	0	0	0	0	0	0	0	0	0	0	0	0	0	0	1045.26102	0	0	0	0	0	0	0	0	0	0	0	1012.848651	0	0	1041.885431	0	0	0	0	0	1043.569186	952.316509	0	0	0	0	0
PA(18:1/20:2)	1049.248174	0	0	1042.790782	0	0	0	0	0	0	1036.294848	1049.993722	0	0	1049.428993	0	0	0	0	0	0	0	0	0	0	0	0	0	0	0	0	1565.421767	0	0	1568.46134	0	0	1052.751404	0	0	0	0	0	0	0	0	0	0	0
PA(18:1/20:3)	1552.402507	0	0	0	0	0	3419.760472	1540.31267	1028.673871	2069.5681	0	0	0	0	0	0	0	1084.269158	2080.652636	1008.076679	0	0	0	0	0	0	3126.785888	0	0	0	0	2570.487002	0	0	0	1052.528344	0	1043.683456	0	0	1016.739033	1513.388705	0	0	0	0	0	0	0
PA(18:1/20:4)	0	3119.204029	2581.624379	6346.427048	0	2074.436954	11917.89637	8376.808669	17645.44428	6256.921768	0	2077.915336	0	4647.92998	3106.375916	3110.524413	5744.306443	6253.395409	2080.294745	3612.861034	0	3148.743188	1544.393231	0	4679.071505	2596.198949	2503.777698	6725.423644	1699.874806	4083.406282	6136.359653	3117.082478	0	2054.940873	4546.546366	3236.349957	4446.55771	6092.718279	1564.080591	9288.759179	9370.979956	7774.453745	2992.993885	3125.442668	7797.393154	0	4161.382362	1913.152268	9167.560728
PA(18:1/20:5)	0	0	0	0	0	0	1559.272312	0	1047.535949	0	0	0	1010.337513	0	0	0	0	1064.61877	0	0	0	0	1045.259273	0	0	0	1608.473339	0	0	1083.592367	0	0	0	0	0	0	0	0	0	1013.79659	0	0	0	0	1044.913838	0	0	0	0
PA(18:1/22:4)	0	0	0	0	951.8995695	1559.340174	0	0	1450.377707	1559.047807	0	948.7189997	0	1557.604747	1023.980603	0	0	1043.260842	1083.417161	1549.196616	0	0	0	0	0	0	0	0	0	1561.09247	1544.39172	0	0	0	0	0	1563.029906	0	0	0	1561.589741	0	0	0	0	941.7771353	0	0	1032.867758
PA(18:1/22:5)	1038.314246	1037.76959	0	0	0	1516.358967	1013.982162	1556.702857	934.4216314	2598.647901	0	0	0	0	2587.904485	1037.46904	0	0	1042.017343	0	0	1037.946427	0	0	0	0	0	0	0	506.0166832	0	0	0	0	1563.791588	1053.327138	0	1017.255724	0	0	0	0	0	0	1527.486866	0	0	0	1547.201573
PA(18:1/22:6)	0	1042.970986	0	0	0	0	1547.615204	0	0	0	0	1564.020956	1043.404545	0	0	2592.894865	1023.965746	1048.062664	1565.508981	0	0	0	0	0	1042.952645	0	1044.662198	2587.695375	0	0	0	3135.951515	0	0	1040.91138	0	0	1573.335681	0	3104.675597	2592.496609	0	0	0	2605.686589	0	1425.768261	0	502.1369879
PA(18:2/16:1)	612.2765394	0	784.0716369	0	454.4788383	361.1697605	0	0	0	0	0	0	0	0	0	0	0	0	1065.630132	0	0	726.9087781	0	0	0	0	0	0	0	0	0	0	0	0	811.0118588	0	0	0	0	0	0	0	0	0	0	0	0	0	0
PA(18:2/18:2)	1048.806577	1513.516058	0	0	1014.048396	2049.456138	0	0	0	1513.305803	0	0	0	0	3088.793118	0	1136.889008	1001.823756	0	0	0	0	0	0	942.4041721	0	0	0	0	0	0	0	0	0	0	0	1042.962192	0	0	0	0	0	0	0	1008.844383	0	0	0	0
PA(18:2/18:3)	0	0	1558.858931	0	0	0	0	0	0	1046.966442	0	1053.913409	0	0	0	0	0	0	0	0	0	0	0	0	0	0	0	0	0	0	0	0	0	0	0	0	0	0	0	0	0	0	1027.091792	0	0	0	0	1008.048063	0
PA(18:2/20:1)	0	1252.788414	1003.397111	0	0	956.3939749	0	0	0	0	0	0	0	1236.221686	0	0	2615.838796	0	0	0	0	0	0	0	0	0	0	0	0	0	0	0	0	0	0	0	0	0	0	0	0	0	0	0	0	0	0	0	0
PA(18:2/20:2)	0	0	0	0	0	0	0	0	1500.832476	0	0	0	0	0	0	0	1624.722234	1584.715272	0	0	0	0	0	0	0	0	1195.32843	0	0	0	1002.465075	0	0	0	0	0	0	0	0	1719.292068	0	0	1088.150622	0	0	0	958.9015309	0	0
PA(18:2/20:3)	0	1019.019139	0	0	0	0	0	0	0	0	0	0	0	0	0	0	1549.822921	0	0	0	0	0	0	0	0	0	0	0	0	0	0	0	0	0	0	0	0	0	0	0	0	0	0	0	0	0	1020.296915	0	1572.423653
PA(18:2/20:4)	0	2078.619014	2591.172679	940.4159094	0	0	1558.628084	1021.091598	0	0	1036.294848	0	0	0	1034.839798	0	1041.445066	1044.625298	515.7863855	0	0	0	1006.02725	0	0	0	3096.450517	1030.092322	1519.614819	1041.76768	1044.731341	0	0	1537.037392	0	0	2074.747004	0	0	1555.379587	2206.87572	1036.564874	0	0	0	1014.001172	0	498.3505887	459.2910148
PA(18:2/20:5)	0	0	0	0	1053.340134	935.7051355	0	0	1048.470766	0	0	0	0	0	0	0	0	1392.705738	0	1033.538042	0	0	0	0	0	0	0	1049.531475	0	0	1009.692312	2096.649758	0	1009.856716	0	0	1042.962192	0	0	0	0	1563.624984	0	0	0	0	0	0	0
PA(18:2/22:4)	0	0	0	0	0	1030.284053	0	0	0	0	0	0	0	0	0	0	1565.375655	0	0	0	0	0	1512.041728	0	0	0	0	0	0	0	0	0	0	1044.867388	0	0	0	0	0	0	1548.411324	0	0	0	0	0	0	0	1033.717738
PA(18:2/22:5)	0	0	0	0	0	0	0	0	0	1015.558068	0	1002.229845	0	1083.440082	0	1525.395008	1565.262366	1004.357859	0	0	0	0	1027.488604	0	0	0	0	0	0	0	0	0	0	0	0	0	0	0	0	0	0	0	0	0	0	0	0	0	0
PA(18:2/22:6)	0	0	0	1027.529035	0	0	0	1043.683456	979.2803987	0	0	0	0	0	0	0	0	0	0	0	0	0	0	0	0	0	0	0	1542.173586	1108.515255	0	0	0	0	0	0	0	0	0	0	1563.649358	0	0	0	0	0	0	0	0
PA(20:0/16:1)	2026.710592	11162.89343	8768.430287	8793.799603	4371.33802	7146.083757	16007.98196	9794.448962	7356.340748	7332.471956	12708.29393	3595.671987	8105.571402	0	12361.57497	2579.087184	11069.90958	3605.974333	2613.337737	2947.230922	0	2006.039308	6987.38713	5330.262184	8706.302037	3416.054103	4420.102683	6066.497247	4699.50194	2614.37265	6447.904888	0	1003.161649	8057.24727	8723.161368	9747.355642	11624.00404	19201.95847	2889.984396	6763.441754	11192.89471	10580.73412	6551.892405	6384.025697	1493.435552	4802.86642	2581.501044	9757.710517	5120.775206
PA(20:0/18:1)	44950.79824	86827.85115	113790.1729	152704.9165	60428.52156	123510.4102	163135.4226	173580.2444	124951.3334	109488.0521	56731.68018	74171.71396	134150.0226	42077.26178	146138.2647	47241.56693	123293.1095	154083.657	68652.58125	57419.17588	29049.05946	21538.14558	39397.91625	47581.26776	98062.44971	56662.76919	158891.454	78957.425	115805.4307	31557.6808	58181.27806	89328.93711	23758.63575	109962.8677	148024.8403	109602.6751	158935.7414	196712.4986	22940.1982	123310.4198	161961.0906	94452.02158	134845.8435	34594.1152	41331.72584	63489.44802	49403.39503	54687.29366	66125.43748
PA(20:0/18:2)	199772.3921	211507.3751	426070.0824	514191.6063	237289.9861	310862.0279	848956.5026	603978.9805	411182.5725	467645.8468	63368.38252	226732.6975	546607.375	107043.5431	627892.0258	200905.9384	429616.1597	721650.4259	191878.5523	195483.6496	103594.7233	107683.4664	57270.29325	145393.6799	339879.4958	268169.7669	674780.9583	460501.22	563752.2464	163002.1833	261502.1409	240720.7992	84854.16256	522515.8431	470574.3004	288739.4707	429038.368	876424.8944	125517.6306	288999.7361	800503.9252	224414.5632	726430.1486	78949.23189	199667.9353	315581.8408	302193.7408	155051.8879	320527.0426
PA(20:0/18:3)	4638.600514	3963.556767	7161.314253	8152.573192	4047.982197	4443.145807	6752.802892	4100.560067	6848.099821	6486.74437	1223.014899	2515.720277	8640.302802	2430.622577	7989.010384	1556.656088	7834.734931	10432.65592	6262.756634	4025.931324	1000.426876	3069.026571	4251.536887	3055.675344	2437.725315	1891.816572	6711.721429	4582.653704	10578.30879	2167.935768	2505.631443	3043.380265	1039.164124	3767.03898	10280.69679	3119.069015	4585.154111	6259.368425	1030.273	1852.590477	10037.76882	1997.743096	5224.426562	4127.45576	2033.445423	8128.60316	2802.53814	0	3090.354829
PA(20:0/20:1)	0	4684.596291	1926.453324	3089.624927	2451.243127	5161.79655	2899.308235	0	2073.20324	2081.566452	0	0	0	1030.845495	1524.528038	1018.254156	1443.335803	2238.778766	1562.345878	1535.847671	1816.717091	972.239543	2007.61939	1291.446778	2019.00637	0	4686.899986	3234.119157	3038.561788	2576.772218	3051.616297	1345.151527	0	2729.121333	2049.59575	0	3311.45983	0	2840.819251	923.2252556	4123.878263	1952.8135	1531.2122	1560.940326	1554.070276	2038.210301	5675.056505	0	2061.141869
PA(20:0/20:2)	1556.674116	4512.266983	2471.269819	2327.514001	2960.822094	1906.262858	9402.041724	3873.667886	4678.267684	6222.860494	1552.336826	0	1539.927218	0	1770.597408	5195.568525	5921.171165	7835.892781	3071.483693	2041.020738	2450.906042	0	3540.854712	1781.309222	3166.577963	1546.526853	3636.571491	1287.754311	4383.591732	0	7698.010471	1958.484731	1239.645396	5875.482433	2368.252731	1551.037531	3633.796371	9172.418395	1029.434757	3548.385288	9363.600347	5205.4892	4509.686466	2075.838943	1528.303187	1541.301957	2464.965917	0	3961.54517
PA(20:0/20:3)	32204.44148	97474.38479	101387.687	109086.6078	52632.19843	109671.9134	192272.6931	167928.6612	164778.3919	107994.1833	31298.43788	52523.29714	100885.6279	44224.70052	148646.4338	49096.26879	130746.9255	116599.2103	62712.11904	68369.12735	53178.07943	19871.31631	30168.85147	33919.20072	107003.5815	38506.55177	111515.4008	85971.75205	226911.2641	62285.316	58300.80018	94502.46334	9762.946517	114805.8316	134891.8286	104726.2477	131754.0835	179391.8632	21854.58007	135979.7688	187257.1457	100027.2283	113551.8788	27691.01898	44539.96929	72217.85378	41460.13285	24557.30216	93668.57562
PA(20:0/20:4)	335454.2944	968629.0291	1411485.867	1382224.252	611969.9398	1294975.187	2145784.915	1719554.155	1952276.537	1002312.877	709928.3693	516575.9674	1228081.277	508908.0205	1646555.406	368522.9506	1219906.481	1210212.331	671864.6536	860916.2449	503348.1402	429693.459	543561.4335	712318.1619	1279822.254	425233.2038	1041806.037	784416.4027	1207805.873	731829.0916	672129.7707	838187.4613	236888.3356	1209949.464	1609688.439	1361746.154	1047029.896	1871425.471	334593.7616	1453153.707	1688908.052	1274341.082	903915.5797	466551.5504	496195.2774	791422.2614	524233.8904	291179.7108	1294487.963
PA(20:0/20:5)	12727.88271	33683.92617	52763.71929	31145.21945	6664.628524	18527.69759	57327.49541	43951.61094	88325.4943	55227.94538	6963.985802	25240.03189	23953.59128	16674.05326	24409.3306	25529.67527	38535.5445	34394.49985	20230.41183	11443.21038	6464.837738	6759.273989	5715.542171	2607.824236	14254.7524	9361.760702	45895.44419	30561.70713	28351.4759	9605.160544	49294.93455	46630.37366	1541.784119	39095.27543	26981.07537	25017.70093	20331.2675	36056.38398	6262.413631	41180.84172	110577.2199	17284.18965	17549.96984	6785.470498	24471.35468	12231.49987	37586.40244	9825.207666	30645.14017
PA(20:0/22:4)	28991.91325	120620.1793	278413.6605	274579.3345	92466.42152	259324.0185	262784.4105	158932.9684	61574.05407	80380.04478	183378.8996	48835.19343	212554.6804	63252.5441	310878.9473	44737.10206	84400.11753	144425.6419	135082.0505	90494.17698	66039.90929	56645.6783	158221.1062	170743.7129	154494.8962	37431.20991	60893.90887	32256.91637	88245.36198	151059.5384	44897.82446	54157.21371	33939.57019	168717.3148	406243.512	326289.9911	130191.5874	208556.087	27150.20551	76049.41896	157099.7417	242874.6634	65687.57837	78719.67868	44425.35957	118212.5427	40643.08211	36743.92714	153823.9158
PA(20:0/22:5)	23946.3423	107296.6798	85419.81254	148352.4711	51508.4462	124485.3671	177342.2859	96686.41218	122072.0831	77594.19431	41364.68446	36651.91778	133683.0684	45671.40319	129794.377	29816.2695	84815.85503	106762.4815	70840.08374	50472.05867	41616.24542	44598.82603	67392.81288	91900.27767	88242.51017	33231.70012	83154.1547	36720.01178	108719.6556	61523.9716	64723.22914	64749.15205	12911.25015	70327.54031	194302.974	116755.3694	79045.90396	121119.3755	14510.98054	93354.33063	128251.8701	65264.72206	81957.07657	54286.16552	56023.32089	41166.01477	40987.37839	39657.609	76883.34965
PA(20:0/22:6)	15645.37055	63251.92934	89964.49	63752.71849	33383.72815	90514.01721	151714.0839	85079.30866	122701.6243	98423.72338	28198.71299	33566.66375	116132.9459	59283.70989	66425.34933	33320.6344	62838.81185	60393.48686	47675.94686	46253.16043	42281.74266	31709.75676	23851.29205	39712.99343	60572.96936	33610.26215	103013.9244	64164.11005	84426.80421	31630.17315	82484.52874	56348.94143	14603.46804	82204.5277	69815.57911	68634.17171	90372.45475	172129.6666	10180.23388	130077.4617	204110.0775	81929.12652	72605.96757	42966.52047	65068.9767	17512.65032	53924.67382	33639.67631	59687.4984
PG(14:0/14:0)	0	0	338.1289222	0	0	0	0	669.3114882	0	0	0	0	349.8747975	0	0	0	305.3592742	545.43157	661.8586195	0	0	0	0	0	0	0	0	0	274.5207554	0	404.0833309	425.2019428	611.7967841	0	0	0	962.0353004	0	0	0	0	0	0	0	0	0	0	1130.862848	0
PG(14:0/18:1)	754.3945435	415.6575989	798.458208	971.5406859	1224.616762	1610.098224	1245.227637	604.8763719	1777.192163	517.137195	526.3963664	0	1114.873367	561.8276932	2116.163691	800.9093304	1272.279126	648.1669763	1041.777552	678.2993318	0	1374.413062	527.447366	415.568293	976.4183605	0	1092.203546	2268.736	1228.469885	2181.423403	1315.476663	394.9163998	0	1188.742496	646.7450906	560.9181686	1600.603927	1666.294994	0	2458.054063	1431.827061	961.5265619	649.3494523	415.5720261	1699.691228	420.5923099	1576.381549	1852.640575	1101.782425
PG(14:0/18:2)	0	405.5635847	776.4053329	1643.505332	956.5151297	2314.9266	2219.681242	668.3921398	1697.01712	696.8845715	0	544.8307893	537.4307287	273.9240249	2583.261939	0	1241.383361	1545.015597	0	1677.295775	0	375.3133361	744.7988152	1037.26524	1058.78884	960.4369386	2098.615715	1664.155782	2085.534317	1682.07948	846.0924936	1034.531858	553.4708531	2635.263098	1527.142981	507.7837018	1103.446198	1461.137495	276.8350444	699.3773049	2225.616814	1114.801313	2209.627724	275.531231	691.4818907	827.5189307	767.0509524	659.4143117	900.4959756
PG(14:0/18:3)	0	0	0	0	0	360.4686604	0	0	599.9975984	0	0	404.5689755	0	0	765.3915827	0	0	674.5391111	584.3339915	305.8800951	0	0	411.723462	0	0	0	401.9523525	0	949.9309936	0	420.9972546	0	0	0	0	0	401.7285982	0	0	0	505.5601207	0	0	0	0	0	0	0	0
PG(14:0/20:1)	0	0	0	0	0	0	0	0	0	0	0	0	616.5807833	0	0	0	0	0	677.8440411	0	0	0	0	0	0	0	0	0	286.9081994	0	273.9593598	609.3003262	0	660.077293	0	0	0	0	0	0	494.9311	0	0	0	0	0	490.3081079	0	0
PG(14:0/20:2)	519.2479632	0	0	255.3238466	0	369.1358286	0	415.8089412	0	0	0	0	0	409.4149999	0	0	625.9542782	0	0	525.9473572	385.3386726	0	0	272.6048509	0	0	276.5212749	0	679.8114765	397.4084865	310.9594725	0	0	0	957.4756033	0	407.2346501	0	0	274.4807121	276.4966434	387.6068513	0	275.4387493	278.4442002	0	493.1685701	0	656.7360698
PG(14:0/20:3)	0	396.8002734	0	829.0153602	283.8362339	501.5120258	424.2239873	560.9155435	0	415.9408667	0	0	424.2045046	568.0115987	0	639.6716515	0	535.3783941	0	368.3381591	0	0	0	0	276.8227011	0	0	382.0121729	363.5212285	769.4896223	381.1643311	0	0	523.8508815	546.117545	558.4909781	0	0	423.511585	0	708.365016	0	277.0003075	280.1005151	415.2032862	0	535.9964471	535.6276479	0
PG(14:0/20:4)	629.2398955	1262.252608	1546.894496	3114.973619	418.7307183	1514.989581	2124.091329	1878.838933	2643.983326	0	1013.766725	1259.128269	1671.429282	1246.224258	2486.739505	1011.90302	1896.843029	0	0	0	415.2812188	1694.85729	1001.900271	621.1180227	789.43316	826.8843807	692.2747123	2117.908857	2372.440237	1184.892548	2500.542342	592.9445436	529.1655057	3675.84556	1704.603508	1526.762504	549.6468797	1373.790599	0	876.4350368	1689.077023	1028.692763	962.2204029	419.2176735	1117.873092	1392.834399	0	1465.56616	3327.301613
PG(14:0/20:5)	0	0	0	0	0	0	0	0	401.3473815	380.614335	0	0	669.3674922	0	0	0	0	0	0	0	0	0	278.0187762	282.6658393	0	0	269.825	0	0	514.4861217	0	0	0	0	0	0	0	0	402.9836716	534.2427814	0	0	523.9270102	0	0	501.1618742	0	0	0
PG(14:0/22:4)	748.0182055	0	623.4500055	504.0264956	0	377.8885592	869.5038289	1146.87761	498.378581	0	1248.013625	0	748.6705856	0	872.8711934	0	1699.312682	1353.877232	913.7488097	0	1216.835966	558.510924	412.3127523	979.0345978	1261.654493	0	0	0	404.0360125	0	281.8134256	377.6864214	0	0	516.5481151	0	0	0	0	0	505.6047376	1260.399399	0	0	505.4771557	499.1781849	497.3025702	0	0
PG(14:0/22:5)	0	733.5263278	418.5606785	1304.96893	499.0172839	586.855589	893.2530897	655.8436566	832.3566919	0	0	0	0	0	831.3286174	0	0	0	0	421.8520463	547.0820889	422.1000527	0	0	1124.679594	1251.023085	0	955.6544604	535.1985519	0	675.5791185	512.2124309	0	999.9507039	0	0	501.8862508	620.7119028	0	752.424684	502.9113486	0	749.4373581	0	756.9578876	504.6676446	0	507.3385733	1014.720448
PG(14:0/22:6)	0	552.5140082	669.2205009	552.6100344	692.1872368	401.1508785	977.1909169	391.0046279	1073.939276	415.2982932	0	0	0	424.1340661	672.0063793	0	1045.034324	902.3646518	697.7967288	562.5878142	426.1270973	262.6123128	287.1815312	0	557.7793093	282.6538831	557.398804	530.6687522	918.913013	930.5681887	1659.648663	632.1495338	279.7559103	1536.762788	1380.351448	263.2373153	414.4454575	410.4260527	261.3396187	1254.865491	1258.167492	837.5725972	0	830.6164032	847.4393308	279.5121418	642.7089013	671.7653157	936.2425013
PG(16:0/14:0)	0	946.9380368	0	963.6005207	5762.089193	593.2900319	2191.528844	2394.736207	2955.59248	1093.05996	1154.210954	0	689.6681073	271.6707229	2817.164987	0	3840.403332	0	0	0	0	503.7010391	0	390.6510008	415.8471387	273.213952	684.9139281	2506.123667	0	894.0508137	768.1396107	1365.506615	0	811.652666	819.3494599	955.8522169	940.8799044	935.7850643	414.962776	6579.023838	1372.705134	635.3056508	488.9676866	413.3872009	1910.93186	270.3202272	0	1028.832304	1616.800463
PG(16:0/16:0)	4098.945583	17131.98217	9893.104419	5630.259544	25388.99031	8906.335642	11862.91902	4723.492149	11356.87531	3284.053686	4998.717309	3645.549755	5993.541485	10878.42233	19220.54107	3876.262727	14579.41438	7341.67901	3111.375966	10430.61924	8042.225437	3902.346681	5099.423302	4736.735328	11350.17867	1246.389464	5298.125135	13130.27079	4660.044284	6969.387168	9984.558411	9137.174507	5646.82639	11938.99683	9713.038449	12774.64128	9419.178551	10753.59711	4605.419878	28159.96238	8383.172392	17897.24307	6563.929587	11789.80361	9956.599013	3755.351088	3058.859267	7113.658801	6795.666654
PG(16:0/16:1)	798.177599	3784.211293	5035.668242	1942.217253	32584.53291	1284.125345	4733.737023	5396.60991	4510.977947	3928.093041	5955.338195	555.0295078	1923.862488	4044.100058	9074.099545	2896.537104	13151.26136	2236.386353	1561.709506	2311.670354	5169.46678	811.7917143	1087.900425	679.56302	2261.20629	2346.0142	2372.915255	12461.51484	1087.649504	4593.717075	4604.285645	3553.718463	1110.760204	4807.162942	1183.680252	2095.982047	2649.355888	4477.060044	2225.197172	23813.25557	6191.418259	6291.454827	2370.802395	1809.906714	6006.555241	0	3122.306383	6752.096659	3359.380467
PG(16:0/18:0)	1873.461329	4349.525438	8385.020325	6300.948155	6070.422774	4404.295911	9810.970629	4237.882609	5071.514471	3649.056208	5931.645245	1611.851076	7206.332352	3088.783209	10335.59788	2963.471076	8537.484567	5412.812581	4338.057851	4624.812643	3768.555934	3611.272969	2508.498252	2779.058543	10911.72285	998.4830762	5002.981896	10805.53498	4581.431562	7744.609475	7112.005331	4860.645933	1257.334341	9401.600546	9538.334835	10450.81524	4822.407288	12074.46571	1818.471319	16042.21921	8577.833571	13112.42728	7182.563788	4062.864538	7538.301282	2768.419881	3341.725783	6857.682218	3585.06926
PG(16:0/18:1)	24459.97864	117304.1178	195931.575	89049.26403	250638.7441	105211.0319	115149.4057	68225.98353	151887.1921	85183.39845	124734.6433	23614.60777	211005.2092	124620.6074	155480.5903	97970.59262	230774.331	76349.95425	82415.23834	167446.7447	96152.40327	117567.3536	45573.29121	72269.49126	247292.4774	53422.59895	85646.21903	216164.2854	99031.28753	130746.7845	133769.74	58690.04685	34034.77769	221874.4858	99246.44892	149910.3705	156738.9694	128517.0678	26559.54731	350980.809	182609.8701	256874.7896	73990.82949	131011.1753	173788.0612	25411.23121	119179.1977	208493.4863	120981.3674
PG(16:0/18:2)	10351.63213	32065.54231	40926.94827	24853.04557	102528.7359	25020.35714	32776.00843	27323.92755	38097.91118	28962.11092	23494.48759	11888.96332	51463.5517	45382.36021	68916.61794	25248.87697	65418.30997	35433.05139	26665.82752	59867.97385	25276.44758	31777.83679	14895.20238	14503.6304	47262.3183	17162.7946	26020.65937	87126.50968	37442.27437	34123.35257	37722.39641	27214.22015	9490.771328	45328.75788	27347.36368	38617.31032	26132.07204	41980.02012	6145.656327	111905.7424	50315.73653	68097.6705	49527.6874	32585.39905	35593.9461	13407.6	24803.52605	50268.94794	32457.47074
PG(16:0/18:3)	0	1666.427107	664.8540861	696.3366193	4351.007425	0	1588.250634	1828.884054	658.4521435	692.2715931	0	0	1665.347194	828.7049222	1395.650169	0	1887.574364	1059.826453	358.8114071	978.5938603	263.6283335	697.322702	421.5186378	424.5775948	680.2913143	694.2095008	402.7881505	3332.174197	282.9293162	938.5181742	0	0	265.5626545	695.2539023	837.3665868	1820.58932	277.197419	1919.319781	417.3793557	2124.599704	1671.773866	1531.6293	2220.217176	0	520.9241209	0	0	1053.533001	399.196628
PG(16:0/20:1)	0	1808.616672	1071.687883	1808.992199	2369.389982	1367.658015	2147.147217	264.893926	798.1080862	975.4099359	932.8167948	419.9432869	2371.218602	697.6648057	2137.54407	803.8910526	2219.762246	1175.681557	0	2013.732276	0	1406.707947	0	464.1541174	1679.146468	1059.085008	699.2872329	1870.395247	1175.787148	1435.617608	1287.501195	805.2859152	282.9133006	1536.581153	1113.512928	834.3338842	2373.10517	1531.555368	277.0892598	2362.005155	1806.19108	2365.810276	558.5602687	2098.253305	1952.467446	418.4355262	507.3299339	937.9504678	1469.124214
PG(16:0/20:2)	2539.008285	13426.33435	14633.24547	10384.93959	21589.03584	16255.85441	21009.48671	9121.29017	20539.33481	10594.19678	7356.05325	282.335829	23238.94836	8792.604646	27544.44529	4973.91731	22211.66942	17026.75669	8510.779923	14977.74886	11140.43318	18504.50574	4678.278374	5831.133265	17227.54047	4932.080661	5756.739516	30013.43227	22278.7612	27733.46883	12446.8883	12371.23095	4176.974747	18360.50596	13576.25665	15756.81279	21231.60911	17504.37132	2232.083333	32339.01064	21741.89624	8909.057128	10643.04682	15673.70464	21554.4838	4190.691637	10479.32309	16506.01036	13719.31911
PG(16:0/20:3)	1066.495309	5735.23579	2107.480985	2713.837734	6916.71183	1444.07794	5932.91737	1126.003592	4960.569241	1951.032416	2374.260871	558.52207	4922.417297	2088.219658	4243.459635	2396.875328	7729.387015	3867.984205	1860.694874	2530.396671	3475.647745	4158.270783	1660.667402	1243.576729	2027.5858	1937.304006	2438.911925	11293.47201	4293.505247	3581.935617	4549.972096	1868.647773	0	2336.243108	3445.606301	3404.106694	3619.412322	6403.486794	418.3312707	4759.670092	11233.06244	2430.289829	6850.837101	2095.930384	4702.008449	539.704205	804.88354	4058.596623	2203.482405
PG(16:0/20:4)	4652.769218	4771.764612	8705.53687	15339.12929	17900.70895	6243.943131	9100.779998	6673.202732	9944.978439	6443.767522	5421.744478	9078.927302	9441.616011	7319.997618	27777.28376	3723.262572	14894.51501	14204.59788	11970.69336	7944.636127	1601.459576	12799.11687	2992.34952	7139.212054	14712.26676	1771.520796	10399.71042	18460.79068	12124.3308	20587.36249	11917.09763	7230.850137	1193.023754	10345.87552	14655.06119	7348.232194	5966.644658	14714.40748	5381.216211	22458.52499	15716.48373	25192.92934	14993.8256	5431.510414	9729.186676	5283.372161	4912.525407	7308.814458	9849.744913
PG(16:0/20:5)	0	0	400.1288342	548.1666768	677.1930752	0	646.2893362	1095.366522	529.4874169	0	0	0	411.1213596	1221.621403	0	0	791.0293295	0	0	278.965541	281.6857769	0	0	0	686.5870185	0	681.08203	658.9640179	0	0	1367.844042	532.1919527	0	0	1229.239383	0	403.1722323	1091.719062	550.23433	686.3868894	275.206599	0	818.0083797	274.6606063	543.4450341	0	0	0	0
PG(16:0/22:4)	0	278.0788999	687.2808388	1516.30552	0	1201.583433	1093.232983	692.6739926	534.9071186	0	400.6284159	0	666.4679664	275.5880372	1045.08273	400.4633663	1046.965638	507.2743613	1201.188733	413.6272442	0	414.539201	398.4568904	393.2704525	411.0340252	0	414.4078112	935.8558293	281.3769461	796.4967551	561.9875175	0	0	672.5162202	1511.006533	2203.834238	551.5127337	0	822.2765127	551.4498294	0	686.7475852	0	691.0772834	0	413.4960963	405.994953	534.1582095	934.7839309
PG(16:0/22:5)	0	831.1248438	931.1642704	550.2548931	831.6286699	667.750774	644.7618227	412.6807062	401.9618801	274.7157764	0	277.9500494	692.7848026	1103.756481	1008.111674	402.101362	1049.096506	730.4412527	1076.295488	363.1767731	0	0	0	619.9544158	556.2833672	0	0	937.9999996	889.2349374	0	0	401.9950349	0	574.7624505	675.4738524	1661.098064	277.2105388	1652.335551	0	1245.707193	846.8535709	0	412.5549835	699.9984669	542.5242267	830.7811016	0	1204.688496	398.6904652
PG(16:0/22:6)	0	275.0038722	605.4775676	412.7552084	412.2128105	691.9430011	963.6427012	281.2478073	566.6865362	277.8672444	0	259.4608172	277.2107146	0	1088.614003	605.21745	2090.633252	3171.656869	624.2548831	642.3542247	506.7011326	760.9045961	0	266.8776195	1241.86395	0	0	1025.290351	646.9925555	801.762075	1021.742132	482.6365514	0	780.7515038	273.862132	411.3029816	0	0	0	415.5690929	1108.899125	1639.104558	1105.422039	959.2390672	690.2579609	0	0	968.0170329	726.2777479
PG(18:0/14:0)	0	563.2739052	363.0639515	419.6335146	1817.56328	488.5987339	697.080928	275.0050464	484.006972	280.354173	0	423.1474574	529.4677106	505.9468857	970.2909534	600.8702994	654.9542334	669.8244754	0	382.2026526	397.1111213	0	0	369.9113789	0	272.7561549	1395.330447	968.6886949	403.6285263	0	926.6987175	0	0	837.4912142	562.788511	258.6844961	560.061599	837.0160035	423.3929566	983.968719	1397.587422	841.7124687	693.627236	415.6871678	417.3677114	260.8460402	717.6814208	482.2835684	690.6138266
PG(18:0/16:1)	933.7444753	3497.017876	794.087287	1674.853151	13809.34618	811.2535188	3486.279754	2233.349421	3674.670237	980.5849696	3756.727035	836.9270705	2626.386204	1723.599118	3616.262263	537.2761057	6716.111986	1047.814713	2220.811013	1376.998914	1371.833073	684.2606984	0	410.1577944	1674.535529	1261.776225	564.6531115	4669.990256	785.8421697	2215.608407	1104.516142	2285.655045	417.6426842	1260.803156	1252.727046	2267.117547	1945.476913	1688.661458	699.0213714	8233.50909	1111.882278	3202.960709	1115.633038	0	3125.61699	0	0	2137.990777	1205.729484
PG(18:0/18:0)	662.5518919	4458.958874	3110.711809	3529.648078	7381.639434	3887.677087	4000.49645	1082.455485	3466.552619	2843.525807	3089.434518	819.124353	6389.180587	2225.69126	4213.160746	2408.936839	7696.61991	3401.736409	2976.915708	6570.42113	2134.28351	2347.865897	436.7020855	2070.654672	5150.652832	1807.59487	2577.540477	4053.049014	5042.061118	6585.822237	4802.561357	2137.036154	1115.763356	7490.935554	4290.048905	4758.467393	3933.365846	3460.776772	419.3609649	5338.038603	4041.136833	9829.81583	3333.362157	1938.271994	6946.503674	0	2959.076957	5395.637519	2566.963555
PG(18:0/18:1)	16216.05202	92172.90805	101504.557	57902.67732	140522.3628	56310.56425	64223.15956	23663.6165	63987.46384	40803.82403	105032.8764	18572.04285	116915.1232	43903.4041	74206.03317	42067.14536	149302.4433	37864.97122	47667.57458	162391.671	67280.27363	67798.95447	21840.08384	42208.41589	102216.5908	26334.97394	37343.8279	86222.62578	93201.76665	117559.1574	114469.6757	53550.03238	19757.24687	130895.1153	72921.84511	99438.60244	65965.87078	55800.78839	8807.078277	133821.4238	86118.8006	238346.7521	45867.59704	51866.9054	116448.4376	12510.11576	52338.91491	109367.8513	52988.23936
PG(18:0/18:2)	15057.94939	76198.22674	73521.22965	52578.9173	178583.4374	50022.39735	58307.37887	24532.6307	79973.70904	37840.96902	59638.23463	14650.76102	101983.1062	52891.86986	105701.2879	36517.58219	157215.3117	63328.73838	61435.34552	130665.1663	87614.84688	59806.60823	22687.55686	38636.62257	85051.86938	28976.14034	32717.80039	128523.4371	110084.9684	109732.51	64980.99204	50131.10766	17950.83994	77720.52729	63869.63091	107536.7659	56478.82662	65388.74754	8556.955684	143926.1449	75496.33638	126880.7538	69247.234	79927.91984	96176.16165	19697.31167	57190.64717	109312.037	83004.41258
PG(18:0/18:3)	604.0881028	1534.739756	729.393001	698.0266658	5016.754768	851.5091503	1113.330234	559.1489496	1456.368069	270.7276733	605.9127184	699.847267	1675.019954	415.8263782	0	0	2667.040416	1332.085184	975.5503931	409.1607243	798.9561149	530.7248961	0	273.5253498	1119.476794	419.988027	415.3157526	1919.60539	0	1088.582352	1213.328306	0	0	969.4560702	694.746394	2082.004382	272.3918742	992.3467878	0	3067.202253	1388.62384	836.5855645	1816.148563	0	415.0370616	418.7972462	612.213595	1696.359944	0
PG(18:0/20:0)	454.0528486	616.0124652	451.4828847	1245.090423	695.1688761	925.0411192	1671.325164	463.4792854	920.3084104	713.9384403	698.7097934	464.9197065	777.7865509	932.9067645	1062.193019	0	1357.27722	2535.257639	1153.999468	906.5745964	708.7081862	625.59377	294.3250712	947.916013	1036.519723	483.3604172	1316.737229	1118.702538	1278.255765	1124.036504	1960.932312	554.559183	0	951.0663453	476.1857214	0	689.0302949	641.1405898	0	817.3287088	503.551768	347.7759003	586.4381555	875.97674	477.9104495	477.5680277	1129.901509	1797.118907	897.6384566
PG(18:0/20:1)	937.2147509	1518.243397	1873.875181	0	2633.946281	937.8721774	946.7385399	553.811059	937.1056242	0	0	971.3393857	965.0045995	0	1606.16698	925.9756467	1648.983432	1146.467628	0	2010.468552	932.4089108	673.3898013	539.8398358	0	563.7093327	693.6411474	438.5347874	3530.557559	1628.259173	2007.185727	553.0706761	936.5446138	416.0637496	1107.339856	1107.192121	1802.173037	1108.591998	416.6249896	555.4257305	1660.239947	1944.631738	1663.753029	556.5724184	833.2203925	2909.877557	277.0397747	531.8640863	0	0
PG(18:0/20:2)	4022.670112	13560.26714	8900.367105	6560.253009	13087.31437	6440.122177	7760.25259	2496.027229	9553.604385	4719.223781	6266.693467	1805.007909	14937.55127	4295.97992	12474.33889	5021.670771	20087.62642	6129.083288	6055.102009	26082.88217	9223.114278	9150.808369	2564.766184	2440.338597	7087.873784	2450.630581	3287.50891	10496.38337	13400.78818	21951.70771	9194.181733	8258.942376	3331.725966	9745.215433	7736.138462	8498.830787	8730.980005	7115.644808	0	11449.9414	11302.09654	11983.61139	4272.579605	5686.860205	11632.25662	1246.621017	3745.601267	5010.915253	6096.338052
PG(18:0/20:3)	1339.097468	4592.938053	1708.815963	1901.377421	3358.173461	1942.231221	3506.419628	1382.28615	5405.763615	2621.327118	2279.634361	422.4463499	4152.16207	1724.221297	2848.962354	2142.10705	13205.43603	2743.535934	2236.446203	4830.408037	2966.214942	2172.530064	688.176947	736.3115231	1558.340287	810.9269994	1360.14436	6614.960143	2747.830932	5948.44172	3167.180261	3393.410499	693.3838853	1799.205862	3402.798602	5556.553532	1802.144344	3709.231639	552.7213068	5193.476798	5799.442436	2318.921871	3428.150617	833.844894	4021.657093	853.1691041	2008.115869	5347.933528	2373.299672
PG(18:0/20:4)	2842.272544	11429.85743	10770.55193	10170.75273	17487.56518	8644.004336	20811.67798	7378.832074	7753.117497	6701.281332	11309.71728	5822.506765	12198.4525	6242.089252	23844.88483	3729.861281	9837.690652	9986.414644	9030.894611	10523.8399	5022.070861	10372.91971	5172.369431	9733.40452	17516.55899	1864.849444	5591.170586	8661.350174	10592.66044	17597.09925	7624.42778	6583.503208	1708.449974	11100.24423	20827.60474	24652.33028	6942.713582	21750.96552	2362.279428	17148.03535	12174.28376	15780.11173	6543.654346	5549.445941	8014.792967	7090.35852	2491.868551	8842.704783	6357.433578
PG(18:0/20:5)	0	0	0	0	0	381.5899884	0	0	0	0	0	664.6675573	0	0	768.624	0	0	0	0	399.2384461	258.246175	411.2094597	0	264.8207686	0	0	0	384.3119999	271.2509684	0	693.922098	0	0	0	0	514.6983115	0	0	394.9541085	0	390.1900271	0	0	0	0	511.925578	0	0	383.77126
PG(18:0/22:4)	0	0	0	647.5142028	0	0	909.6133959	707.3145957	0	0	0	0	645.1524196	0	385.3472127	0	1159.178569	0	389.590271	528.2806341	651.9763503	0	389.274986	0	0	0	0	0	0	776.0467422	0	0	0	0	1177.8054	376.2267333	0	1107.26116	0	0	649.4893673	0	0	0	0	0	0	0	0
PG(18:0/22:5)	0	0	393.9293079	678.0522814	659.1145258	0	0	0	523.0412837	0	0	0	401.3022822	0	0	0	1148.09274	737.0189811	1308.70488	0	262.8056407	287.3257653	265.5416376	0	776.6159344	290.2239874	0	0	0	683.1360581	791.381692	0	0	0	401.7156337	801.0605932	799.9214357	0	0	0	398.3721689	0	0	0	0	0	653.9357122	0	0
PG(18:0/22:6)	0	0	0	0	0	0	514.0852431	0	0	0	0	0	0	0	0	0	1484.265187	673.3045275	0	0	0	0	0	0	0	0	0	769.1778383	594.1448533	1479.883452	535.1662717	0	0	0	0	0	0	684.803918	0	0	0	524.0125173	0	0	0	0	0	0	0
PG(18:1/16:1)	1198.417546	3806.790203	5028.992172	6480.961451	7427.478227	4283.530316	5522.750597	4041.16099	3409.02188	2818.463512	2957.200147	1549.987889	6969.084346	2622.564159	4667.750821	1682.16052	6221.660145	1601.253117	5945.811445	2680.868968	2941.95166	2943.161592	1808.979885	5083.935577	5847.45279	1114.559616	4869.6584	3942.376756	3086.269368	2165.600838	4055.17191	2646.013728	1248.398281	3822.706169	5134.074786	4428.62453	5533.831627	5086.093791	838.0238405	6100.684304	3362.481518	6194.709149	3418.639773	1941.881822	6086.821195	2201.214395	4062.759004	4567.113106	3341.052932
PG(18:1/18:1)	2926.984992	7473.637338	23087.52329	12925.27788	19399.14875	14003.23391	19038.47797	6323.786642	8777.217303	8730.274694	15928.52091	3811.946058	17168.79412	10323.229	15226.94652	10506.15994	26152.34081	13534.61851	19418.49447	21746.00886	9713.418693	10576.30275	9177.56323	7721.97303	36596.07678	5582.605873	17036.81029	74043.58489	13989.20442	11945.96863	20092.34471	6248.16714	2222.07577	23377.10919	17186.35234	19476.48252	21514.84406	18045.43942	4574.471001	27049.8585	14970.58791	38535.97372	12562.68988	19757.29575	24427.98885	5918.640511	11971.18623	251863.351	195426.7746
PG(18:1/18:2)	6860.457709	28193.1059	32710.05277	39345.69568	95350.7475	38309.04083	38061.05257	27618.13492	26977.31099	51706.51024	20519.50929	10377.72856	182580.3377	30215.53335	25299.56357	185334.9339	155335.9318	66870.28685	40834.64344	92096.30997	51233.20047	206149.8895	37836.4822	71221.99426	141003.2977	19432.37018	63492.4032	31887.45951	82097.01427	45941.1785	97096.18625	26359.88733	13831.43512	106918.2852	17474.79338	80434.16652	239837.2883	29271.7505	7525.6731	69148.12039	80089.81274	80727.89205	95949.77207	106705.2263	123292.5846	18679.29101	130111.6713	112548.4812	45766.51606
PG(18:1/18:3)	0	0	0	555.0395611	418.1606553	0	1254.414075	700.7721907	1336.379457	0	0	396.0367346	1254.312322	0	803.4663458	0	1465.036889	500.0845495	484.4520381	1743.537723	0	0	0	486.3966131	4004.242678	0	978.2499638	924.4196474	1881.689047	0	4352.546208	801.0471378	0	1659.799138	420.837059	650.1964545	654.3682738	417.2505454	279.6677897	557.7867977	962.3525408	279.1379543	1455.326997	0	0	0	0	802.9830133	0
PG(18:1/20:1)	0	0	0	395.1801169	0	0	0	0	631.0190931	0	0	0	665.184463	0	0	0	0	0	656.3265767	0	0	0	0	0	1068.006623	0	0	651.776	356.1273945	1061.182568	536.1764351	0	534.3387061	0	0	597.4162838	0	0	0	0	408.1249129	400.0090132	0	800.9727599	1197.545621	0	0	0	389.6164391
PG(18:1/20:2)	0	974.465759	808.9831864	694.7747332	423.3956238	496.9003593	975.4047258	281.3437714	535.9139026	272.3321141	0	283.634742	1531.657962	0	670.6223637	402.1582023	647.0367772	379.6881593	0	277.8569189	268.7295608	544.2730163	0	669.6916778	1535.5513	0	419.1918602	0	1220.205253	0	402.6259167	0	276.1141362	973.4278275	1261.916812	1112.149525	839.5701063	406.8665908	279.5358707	554.7270648	1672.017648	1439.849791	0	558.597376	1664.23576	277.8579921	540.8371379	1073.124922	530.2352057
PG(18:1/20:3)	0	820.4558544	797.7914522	810.6603732	1081.181379	1330.144189	2100.283663	684.5070387	398.7889631	0	0	0	274.0844229	1356.297575	926.1197462	0	1512.41371	934.9580174	519.0094794	1160.686169	508.0322321	0	638.1389398	386.2933427	1221.133642	0	1642.055383	0	2546.000494	405.0705214	1304.851353	0	0	1776.896706	640.3389257	1504.031729	1219.462262	880.559518	273.3264572	803.1810641	547.772085	540.3302313	555.857793	411.7308559	544.9923345	410.2539564	665.1558453	1058.103543	532.1747994
PG(18:1/20:4)	1887.226969	2620.928788	6134.210672	6898.096655	4453.846617	4460.546081	10238.0534	3396.525156	2597.50869	1649.856122	5492.10772	2264.9926	3674.456733	3303.746263	7579.288836	2346.768841	4819.04319	3645.028069	4889.927699	4412.489475	625.5789456	2879.058368	1788.397603	5167.599707	10267.22854	979.0350798	4099.744291	4365.948709	3220.689711	5051.687183	5290.785583	4405.711467	1057.289541	7163.245898	5017.879026	9152.487946	4868.104058	4381.252318	1192.009612	9603.70899	6032.130398	3143.839836	5106.913323	1350.75407	4522.007373	1269.207666	1781.713136	4011.482238	2919.958044
PG(18:1/20:5)	0	413.3697704	525.3107123	410.5956661	0	0	413.4145157	675.676656	0	0	0	414.1409695	413.3924823	275.5925439	0	395.0224963	0	0	541.984107	0	0	0	0	0	0	0	0	769.814935	380.8748336	531.7991165	253.0533311	793.2839074	0	663.9207397	413.2908546	964.8421664	0	421.8411857	0	413.218678	690.9860031	688.3379518	0	0	0	0	0	394.2806658	0
PG(18:1/22:4)	0	415.9958042	390.6087173	782.7309871	556.0888069	0	828.4310949	413.7663003	0	0	400.2386821	0	547.9186031	0	996.7048275	0	811.2171736	532.3983314	677.2609292	0	0	0	519.9902529	1191.79448	553.0134463	0	0	0	257.4803105	540.1711952	538.5115387	0	0	0	895.6978215	413.7679799	1108.026893	975.086657	0	0	834.838001	262.6185342	0	414.6163665	0	418.3017204	0	0	373.5064435
PG(18:1/22:5)	0	0	740.820097	328.156787	0	0	559.4537948	442.645994	0	0	0	0	0	0	857.8720545	0	0	0	541.4183647	251.9229716	381.7577986	318.0417178	0	379.1848905	661.8463448	0	0	1930.883229	752.9042251	0	445.1609712	0	0	308.5163403	605.0509705	0	0	881.3945824	0	441.5804581	0	0	461.1557478	0	325.4418665	0	0	5449.973455	2070.430772
PG(18:1/22:6)	0	0	332.4876807	711.2031197	451.9612058	0	1508.062798	0	834.2383077	394.6533271	0	0	0	831.8239196	0	0	0	544.4120711	0	245.9213347	514.4196368	0	0	0	601.2766182	0	595.0019272	701.7130522	527.3250964	0	732.0515383	707.7148218	0	712.2975437	479.6490794	620.619321	0	1197.154343	489.8900715	1186.876065	1107.55372	356.2729859	358.0066333	0	2385.874414	0	0	2957.998279	1056.455198
PG(18:2/16:1)	4379.344534	5520.159863	9144.572665	12338.0972	3181.345268	5134.173699	13485.25739	7493.213593	4081.22786	5295.685873	1779.791893	2108.639893	10184.12139	7708.952135	14760.25852	3495.050024	10569.0759	31279.24672	6533.591665	5554.344129	4339.522696	3739.501263	3350.46995	5415.540713	5973.101747	3193.304995	11819.21711	8378.28268	2218.122764	4937.52287	8044.140435	6017.640444	2286.76903	15068.22012	7138.507554	6547.814647	6843.750737	14565.6631	1189.834788	8311.080184	10006.45728	11135.80748	7741.801573	7037.068649	7820.571544	3831.703647	3078.293341	8606.401797	3559.829022
PG(18:2/18:2)	2916.517424	7740.140432	10418.17288	21629.50593	9681.397033	11731.60461	18275.65542	7948.864553	3746.623665	6151.069726	8541.731823	2425.627149	13242.46603	8103.317728	16276.21926	3920.178303	5722.557752	10641.91396	18384.04364	7975.153683	5205.284678	7187.372883	5008.436709	10401.05383	11996.47421	2507.590244	6842.901464	32045.13048	8412.196562	10884.87155	6451.364656	3809.035843	1888.311096	11144.75466	20377.06509	23630.70623	7073.179605	9681.936561	960.5736752	4404.969799	17966.67836	12369.21754	8024.003662	4791.86104	8595.967927	6996.991903	7285.453707	34890.5854	34084.88009
PG(18:2/18:3)	0	1367.483019	1017.753603	1651.85897	1656.28737	0	1330.653171	1319.983532	1348.509191	1577.217309	0	1036.949497	1984.361653	0	1385.760554	1703.824504	2208.678896	1619.689784	875.0939282	1279.284173	856.3804072	4309.592662	0	589.2341379	1896.305353	965.3775721	573.9445232	3560.191931	0	828.2321043	0	1327.354815	0	0	2350.7064	1400.72488	1306.084066	0	0	2547.550778	3091.598855	1659.157263	4039.732569	426.1442332	0	656.8816032	1506.125165	1629.686101	426.6194546
PG(18:2/20:1)	0	0	0	409.2545531	0	338.0941671	0	0	0	0	0	270.9011506	0	0	0	0	0	0	0	418.6295692	0	525.3322544	0	0	0	272.6761631	0	904.7616249	0	0	0	0	0	0	0	0	0	0	0	405.4323216	541.8	0	812.8067093	541.6668988	0	0	451.3317693	327.6931426	0
PG(18:2/20:2)	0	320.511191	2325.320859	3970.104155	1173.537437	2179.253531	0	1996.066794	1487.831404	1538.50434	479.7105443	0	2746.934049	0	0	2990.724521	1813.226955	2548.727365	3381.649086	1553.518525	0	2906.939493	908.6279742	2896.637758	2617.242636	1479.227826	1383.926823	1348.449747	2386.777578	1035.99621	0	1303.744453	876.1070307	962.3570861	2147.830018	977.6838226	2796.771026	553.3246243	0	2558.517538	2449.495891	2599.025999	1859.150655	2064.049599	2329.233327	975.9976337	5782.19617	2240.081559	1770.850807
PG(18:2/20:3)	370.6140688	0	0	960.8601905	351.4111353	1175.64046	362.4466386	0	370.1913485	646.3929352	0	0	0	358.881746	0	0	491.871144	1283.043611	2290.527006	2624.021107	0	344.0752388	0	348.2868749	509.4242225	0	0	0	797.6170064	636.5154203	1128.511985	0	0	0	0	0	357.2250398	0	0	352.5585183	388.8732884	0	0	0	517.2701992	0	0	0	473.9302604
PG(18:2/20:4)	1225.540432	1347.445653	4390.064969	1206.975695	2006.945761	1940.487436	2506.147482	1877.503063	3136.167543	1904.791631	2027.830523	1014.548725	1676.132111	1671.586587	3660.732369	1077.134014	2441.800419	2444.334751	4504.414931	3893.878813	954.3448013	941.148643	1372.692732	2578.02973	4232.640738	1838.022299	1841.71159	4664.344567	4492.87621	3823.927357	2412.748137	1983.00715	369.5247997	751.735201	1913.36492	3144.678697	2422.731545	2387.246211	0	6797.742579	1790.965771	3609.496795	1847.896453	2045.549628	1831.823181	1183.820373	2513.492501	12141.97104	8509.030504
PG(18:2/20:5)	586.8413043	0	0	0	0	0	902.9774631	0	468.2815215	568.7759709	401.6889945	0	0	0	400.928	0	388.9183988	0	482.6135084	0	379.424669	0	0	0	0	0	0	0	0	0	513.8633334	0	0	0	398.8137756	0	338.894897	0	0	573.3259067	576.4530412	0	0	0	0	0	0	0	0
PG(18:2/22:4)	0	0	856.8546382	0	0	0	0	638.4261355	0	366.8011618	0	0	0	0	0	0	0	0	524.8440751	258.6938473	0	389.3639453	0	653.0224618	367.1460413	0	1106.088003	0	0	0	518.8195278	0	0	0	1234.640358	370.130205	0	0	0	0	0	0	0	0	0	0	0	0	367.1600422
PG(18:2/22:5)	0	0	0	0	0	0	0	0	0	0	0	0	0	399.5378414	816.6792365	0	366.5290609	0	0	531.2773655	0	0	0	0	0	0	0	0	1152.309943	0	643.1189043	0	0	0	0	0	395.0227895	727.0428906	0	0	366.2497735	0	0	0	0	0	0	0	352.6039363
PG(18:2/22:6)	779.9942708	399.4006916	781.2169775	0	0	0	0	0	0	0	0	933.2741961	406.3011859	0	0	781.3513826	0	772.7920931	0	565.8716753	414.5713501	448.6120714	277.5447897	0	0	0	0	807.0400937	0	627.758509	405.2104582	512.3647044	0	662.2943789	402.7807634	0	400.1954985	0	0	541.4924496	534.3721391	405.9380226	0	662.2098929	0	0	513.5090548	1788.22607	1066.057755
PG(20:0/16:1)	0	0	0	0	0	0	0	0	0	0	0	0	0	0	0	727.2111936	388.196458	839.5530161	0	0	0	345.3602961	0	0	0	0	0	0	0	0	266.0651289	0	0	0	0	1205.418417	0	0	0	744.2177631	0	0	0	0	0	0	0	0	0
PG(20:0/18:1)	0	0	720.3535457	858.3429984	0	0	924.541286	0	446.3842236	0	0	0	1316.550182	0	505.85339	945.2537682	1354.980632	0	2244.422226	1391.295088	0	2286.997316	633.1837069	0	0	567.0737336	0	598.7867876	1103.085941	737.7901717	911.9986711	0	0	538.6795387	0	0	1178.95939	0	720.2795564	661.0158661	824.809191	1010.446761	900.2319304	1438.471382	1176.495568	0	1212.082097	1748.143061	0
PG(20:0/18:2)	0	0	0	1105.975371	0	0	789.9348594	0	939.6836918	0	0	0	0	0	0	0	877.9469961	610.7815144	1184.569618	532.8355332	0	406.2677892	0	403.3889892	0	0	0	0	1438.397175	0	753.991825	0	0	391.4627266	1847.3887	0	0	0	0	627.0616704	0	0	0	0	821.3427432	0	0	0	0
PG(20:0/18:3)	0	0	0	0	0	0	0	0	0	0	0	0	0	0	0	0	0	848.1431101	0	405.1749341	0	564.8971775	547.2682102	428.9807777	0	0	0	0	0	1094.089906	0	0	0	0	0	0	0	0	0	0	0	0	0	0	0	0	341.0708068	0	0
PG(20:0/20:1)	0	0	0	0	0	0	0	0	0	0	0	0	0	0	0	0	0	0	0	0	0	0	0	0	0	0	253.8148595	0	0	0	0	0	0	0	0	0	0	0	0	0	0	0	0	0	0	0	0	0	0
PG(20:0/20:2)	0	0	0	0	0	0	0	0	0	0	0	0	0	0	0	0	0	0	0	0	0	0	0	0	0	0	0	0	0	0	257.1477599	0	384.2852707	0	0	0	0	0	0	0	0	0	0	0	0	0	0	0	0
PG(20:0/20:3)	0	0	0	0	0	0	0	0	458.3731864	0	0	0	0	0	0	0	597.4960757	0	0	0	0	0	0	414.7107683	0	0	0	0	0	0	406.3769976	354.5355435	0	0	393.3745206	0	0	484.6169887	0	0	0	361.2995491	0	0	359.1508031	0	0	476.490289	0
PG(20:0/20:4)	538.2910759	840.9249527	645.5760832	0	0	0	1276.520387	0	0	0	0	0	944.3803199	0	1755.363194	0	1191.688876	1190.415054	0	873.1664273	492.6152275	381.6647506	472.4936419	735.2951194	909.1153457	0	406.3475748	786.6304956	1010.202384	1018.220573	1138.495742	1401.419719	0	842.6121592	1086.853753	0	0	1289.643357	0	1074.048814	962.0006006	1351.733358	704.9620572	0	799.0677516	0	800.1526789	939.2490576	619.1713539
PG(20:0/20:5)	0	0	0	0	0	0	0	0	0	0	0	0	0	0	0	324.6905185	689.9293222	0	0	0	0	0	0	0	0	0	0	0	0	0	0	0	0	0	0	0	0	0	0	323.1959614	0	0	0	0	0	0	0	0	0
PG(20:0/22:4)	0	0	0	0	0	383.0933055	0	0	388.340328	0	0	0	0	0	0	0	0	0	0	0	0	0	0	0	0	0	0	0	0	0	0	0	376.5161751	0	512.2250433	680.834629	0	0	0	409.702906	0	0	0	400.0462598	0	0	0	0	0
PG(20:0/22:5)	0	0	0	270.7374584	506.5926755	0	0	0	0	0	0	0	0	0	0	0	0	0	0	0	0	0	0	278.5307527	0	0	546.7834736	0	0	0	0	0	0	370.1737676	370.7810943	0	0	0	271.04434	0	0	393.911297	0	411.4510338	509.6829984	0	0	486.6348595	388.2173839
PG(20:0/22:6)	332.8264117	0	0	0	0	0	0	0	0	0	0	0	0	0	0	334.1055713	0	0	0	513.609604	0	0	0	0	0	0	0	0	0	340.6005292	0	345.594862	0	0	0	0	0	0	0	0	0	0	0	0	0	0	0	345.4762354	0
PI(14:0/14:0)	825.6188643	0	0	0	0	0	0	273.5506024	0	0	0	0	0	0	548.3137787	0	589.6769041	0	465.2064228	0	0	0	0	0	0	0	0	0	0	0	0	538.8191612	0	0	755.4139776	0	0	0	0	0	0	0	0	0	0	0	0	0	822.5831017
PI(14:0/18:1)	1119.819676	8848.040364	2950.312751	7536.548163	3996.14079	6343.776442	3530.56821	13209.56645	715.1628086	2288.19535	2268.097472	2451.925341	3420.930639	884.1876984	8243.487727	4513.480151	2838.766145	2806.580311	6355.88771	5580.137312	4127.011264	3664.331964	1762.633321	1161.391105	5796.285348	839.2542862	6795.692793	2728.518485	4354.951205	2421.318077	3729.076969	4325.495614	0	4860.260497	5425.414441	4730.208124	6360.030144	8478.568791	1153.615128	7989.075433	11484.17425	2813.546732	2505.671063	4294.516384	7369.93208	593.9233814	4072.228982	1712.448064	2395.375682
PI(14:0/18:2)	3700.892901	24783.90377	7674.674495	12143.66943	4880.235064	13065.79161	13617.31374	21775.43649	7673.394767	11477.56072	1934.492611	2884.272715	9650.23204	3872.899054	16620.04661	7365.257774	12284.69703	18726.16905	11553.30375	8038.480224	3624.178464	6699.130893	2647.539915	5830.946942	12540.73717	2902.383623	10965.37975	14358.86885	10991.02497	9582.753139	10312.01137	6782.313218	0	11182.26352	20889.0304	18292.33656	6623.311884	32493.94403	2622.260514	7131.509998	22099.40425	5917.746535	22238.53899	11288.8368	7965.340496	4174.854783	11546.07313	8577.225248	7881.52611
PI(14:0/18:3)	0	0	0	0	379.6031562	0	340.2242939	0	0	0	0	0	0	0	511.9663898	0	0	0	895.0638113	0	0	0	0	0	0	0	0	1047.66527	197.0850427	1182.682416	0	0	545.1370733	0	0	0	0	0	0	0	257.7265118	0	0	0	0	0	383.7621597	840.4820614	0
PI(14:0/20:1)	0	0	0	0	0	0	0	0	0	0	524.4730281	0	0	0	0	0	592.6242383	892.3642576	671.2300245	586.0760392	318.6496538	0	0	0	0	0	0	810.2677217	0	592.5230989	822.7378625	346.4563162	0	0	0	0	0	0	0	0	0	0	0	0	0	0	0	531.5356794	434.2011718
PI(14:0/20:2)	0	0	0	0	874.55551	0	592.1972807	0	563.6917073	0	0	0	869.7931436	801.2540974	852.2334381	0	0	1629.64359	904.4004656	0	0	496.8271981	0	0	466.4588493	0	0	0	206.7233111	897.7044995	0	0	0	0	0	0	0	0	542.4347258	0	0	0	573.6971576	0	585.7429761	0	563.3197526	0	582.230656
PI(14:0/20:3)	2501.108803	2626.230473	4475.242222	4096.398812	2981.86371	3879.22738	2587.526307	1590.753024	1969.358325	1085.417546	1079.371316	1901.93646	4733.014199	3054.059094	2107.258736	1400.901748	2520.206801	2689.817614	3037.540026	2048.500399	1058.677638	2156.036162	2394.205589	2566.090552	2738.367489	1054.194561	1926.140142	1138.183126	2899.528832	8619.989624	2325.785602	2470.866107	879.2425265	1897.624111	2131.465035	2110.238174	3512.12149	2296.956658	1371.13575	2521.491786	2910.758589	2058.416833	2789.563825	1984.132037	1908.257746	2422.770258	3529.955092	1414.304141	0
PI(14:0/20:4)	2015.564934	7299.870699	6583.959366	15138.43504	2001.511892	4679.665818	7422.49559	8701.291304	10071.01965	3510.336241	2589.347436	2963.324003	5359.807892	1421.80192	5874.539655	4118.741085	8482.371436	9439.223496	9286.228264	9690.289946	2756.652026	5488.275308	1160.975335	2605.896902	8429.104856	2843.380626	8465.676778	4712.140692	7820.934445	9239.026814	8768.442583	10001.45892	0	7312.136607	18166.57011	8291.087161	4990.365911	9009.541237	1886.194517	7339.615475	7949.629945	7783.001256	8620.499862	5069.926917	6237.122651	2269.940264	3209.703965	3639.552451	11489.07271
PI(14:0/20:5)	0	807.5624244	1446.198601	1136.717689	572.4618645	1460.830059	0	2160.376348	1555.877024	0	0	550.3926624	0	849.1730683	1166.084111	0	1747.895861	887.491573	1026.169199	4622.025958	583.4612168	0	0	0	1102.276487	0	0	587.3553488	0	453.0316353	571.5055684	0	0	1713.895231	1955.686317	1374.70251	847.132668	1093.20196	0	0	2198.197523	0	0	538.5003476	2274.366785	0	0	853.0136617	1421.256608
PI(14:0/22:4)	0	0	2636.810339	0	556.2610129	1444.647029	0	1353.15855	885.0638133	0	587.3322916	0	0	0	2043.862811	0	2982.655858	1502.149021	2085.627646	2020.188642	0	560.0162399	0	0	1940.378882	0	0	0	839.161476	1202.122993	1451.336411	0	0	842.0397339	1650.375644	0	1123.870208	1641.884605	0	562.9451994	1092.376396	1633.411558	822.6468569	2186.969103	1165.730781	0	2086.786416	0	1800.530786
PI(14:0/22:5)	0	1076.769736	1380.153256	1402.91788	1382.842063	0	1412.291829	0	1455.887461	826.624274	0	1729.52491	1006.015763	0	2038.258987	893.3851273	2689.480026	2398.991054	0	1445.4983	0	1133.218475	553.3015543	869.5077664	1365.677355	0	0	1419.473528	1138.696323	895.3517746	747.3235402	0	0	652.335793	1560.519952	0	0	1363.93338	0	563.2742676	817.8319716	664.8245454	784.4708107	590.4762751	1711.555754	0	2231.497391	0	0
PI(14:0/22:6)	0	518.9548338	824.7026629	0	0	823.6095773	0	0	0	0	0	0	480.919727	0	560.5376006	0	264.7141754	0	0	0	0	0	0	0	1193.069266	843.1940689	0	0	0	0	749.4008412	822.7102312	0	0	0	0	0	0	0	0	0	0	810.3023249	0	0	0	0	0	555.2440852
PI(16:0/14:0)	0	0	0	0	0	0	0	0	0	0	849.4541392	561.3485337	936.2791268	0	0	0	593.7345871	897.2951793	0	0	0	0	0	0	0	0	0	569.4600114	1330.28754	596.0332387	588.1757671	0	0	0	0	0	0	0	0	0	0	0	0	0	0	0	0	0	857.9540378
PI(16:0/16:0)	0	487.1563803	354.7151056	0	1283.503072	893.4543343	0	1036.276382	1128.947013	708.5234625	0	0	0	917.5691325	707.6141159	0	803.5980611	2140.822196	0	1072.954748	0	0	0	0	0	0	0	0	0	1081.169732	1477.53268	565.653646	0	991.2931447	2594.549432	0	969.9350904	499.4710978	1054.029864	0	0	0	1037.336157	0	0	0	1045.397642	1565.177748	904.2996617
PI(16:0/16:1)	1523.176054	0	0	0	2094.464858	1483.627381	913.6361057	0	1314.270875	1559.047807	0	1377.380519	1132.434118	0	1823.075387	0	0	0	0	0	1019.604737	0	0	0	0	0	1614.769228	2073.32165	0	0	0	1030.132308	0	2384.444416	2224.992936	1372.277867	1032.906382	1426.347747	0	2102.457108	2539.535548	1242.113322	1467.94534	0	0	0	0	0	0
PI(16:0/18:0)	2355.132578	2305.106669	2970.974899	2565.170075	1909.090371	4224.373543	3499.9552	3064.876669	3447.222982	4662.464438	0	805.2497402	3649.433071	1032.469672	6831.044023	0	4865.380794	2552.764598	2645.306085	1162.627947	2015.933628	3121.806402	1565.989416	927.7088275	3930.345924	1020.743101	5680.311605	977.3651897	4106.023549	3051.945028	1377.052947	0	0	3111.751049	4564.54548	2081.174843	951.161893	0	0	2241.816305	3633.720276	941.8970601	3403.017859	1602.744311	2229.474394	0	3258.380123	1537.522131	1917.98893
PI(16:0/18:1)	2247.532658	2786.964218	3417.652754	3957.85207	6163.965759	6783.869365	5804.181838	2778.364936	2772.275938	3991.59863	2017.315695	3040.066353	5379.921837	3986.73319	6381.883556	1900.446624	1491.907126	1054.107539	2793.862435	1942.146006	2455.237706	974.0873921	1587.206208	2151.026961	943.384032	0	13871.27972	1822.259291	0	2208.367454	3285.756689	2758.183976	2632.763671	8041.792591	1547.463992	8787.227809	3822.662026	4896.955051	3492.764711	5313.660154	10749.6795	9996.582873	12718.65093	3364.066221	1466.621176	6539.742929	799.4058472	1000.860646	1505.010343
PI(16:0/18:2)	2679.221261	4204.116	2460.56246	3883.538968	6136.716066	4648.040864	6344.440267	3865.615676	12398.75489	10695.50429	2325.981631	7975.322521	5617.955561	2514.772115	15595.84247	8355.427493	1949.312079	2935.310363	2074.077872	3980.137166	1980.141399	0	997.6989686	1176.693088	2738.729682	1682.649023	7462.980414	3375.719972	1574.343892	1011.752029	801.8850231	6782.673329	1420.750886	4046.694685	7773.134014	4549.708619	4040.834736	10548.79037	1957.839688	15687.49495	29905.39059	8076.453477	10337.85444	8051.349292	5746.445098	7013.464705	2857.449433	2075.217868	1553.905621
PI(16:0/18:3)	123144.4801	674193.3624	313758.2247	622692.062	625523.7825	252443.0481	506594.7973	377264.4374	368368.9085	412518.0567	140754.2825	130375.5151	336702.0815	163616.93	428418.4958	264013.5444	631925.8104	395023.1867	213371.076	310064.3169	246434.2067	278430.435	55568.55243	218939.0604	201532.1268	114906.4178	450520.2023	1059174.295	280233.8848	271450.2972	382017.0069	303962.8972	32563.90333	416364.3072	632872.2169	631259.0005	316472.7406	716250.5293	46509.86778	476394.1634	817934.4994	179987.5605	1033937.444	154696.7241	377272.1509	60488.90394	211423.8904	336063.9032	263851.4423
PI(16:0/20:1)	0	0	0	0	0	0	2082.126171	0	0	1033.767257	0	0	0	0	0	0	1056.173701	0	0	0	0	0	0	0	0	0	0	0	0	0	0	0	0	0	1052.829189	0	0	0	0	0	0	0	2092.826167	0	0	0	0	0	0
PI(16:0/20:2)	0	0	0	0	0	1573.37857	0	0	0	0	0	1557.716792	0	1042.597516	0	0	0	0	0	0	0	1045.26102	0	0	0	0	0	0	1576.878814	0	0	0	0	1043.339016	0	0	1027.355648	0	0	0	0	0	2950.993901	0	1052.749926	0	0	0	0
PI(16:0/20:3)	436.3115023	498.3719184	246.7063498	512.4130067	0	466.6694599	855.0156139	365.7037747	0	247.5780445	0	0	0	0	337.0264948	348.9224108	1587.181777	0	0	1430.154156	0	317.3268044	0	0	1545.560204	0	0	645.2370726	1000.552048	0	1501.784553	0	0	0	1141.560288	0	0	0	383.0552308	319.9216379	3015.697515	404.3463963	0	278.5418349	415.5168205	0	389.6235923	0	250.4357488
PI(16:0/20:4)	1643.055557	4383.663236	2164.485121	9762.947733	30987.68058	3522.119138	9384.442165	4558.032892	4980.12065	4232.236903	3169.792377	6420.756016	4879.73206	4490.894241	19954.93933	3119.657481	4848.357514	1675.189727	0	2992.875213	2973.030872	0	0	2271.169996	0	1652.224565	7512.947058	1235.420571	0	1385.823787	2586.332098	12798.2405	3992.34683	4814.783792	8149.630437	3557.848595	10581.82891	7038.537973	4104.782218	25969.01363	20637.55286	8049.343789	17625.12296	6957.891492	3826.840486	2875.15617	6086.171003	2293.512186	2215.314042
PI(16:0/20:5)	0	0	0	0	0	0	0	942.7893236	0	0	0	0	0	0	0	0	0	1533.069261	0	0	0	0	0	0	1053.501715	0	0	0	0	0	0	0	0	0	0	0	0	0	938.0981992	1575.292237	0	0	0	0	0	1573.302123	0	0	0
PI(16:0/22:4)	0	1025.982434	0	0	0	1757.202891	0	1198.217384	0	0	0	0	0	0	0	0	0	0	0	0	0	0	0	0	930.5948956	0	1016.947367	1559.580364	1567.136873	0	1034.110974	798.624859	0	0	0	2605.556152	0	783.5395555	0	1011.039235	0	0	0	0	0	0	998.0507533	0	0
PI(16:0/22:5)	0	0	0	1553.78329	796.7795329	1573.427731	1235.20257	0	1461.39501	0	0	0	1042.969395	1554.208626	3473.982983	0	0	957.2014652	0	1049.056401	0	0	0	0	0	0	2107.824731	0	0	0	0	1740.177466	1038.438674	1044.585715	0	0	2034.149858	0	2102.763373	2050.555181	1952.018022	2069.65604	2994.161115	2072.414335	0	0	1037.487228	0	1450.320189
PI(16:0/22:6)	0	0	0	1564.942216	0	1573.538557	0	0	0	0	0	951.3367757	0	0	1047.900692	0	0	950.0581687	0	1006.107629	1050.241351	0	0	933.7645403	1981.555764	0	1407.424557	0	0	0	1568.510849	1344.589565	0	0	2630.86932	0	0	0	0	2597.706751	2535.866933	0	0	0	2085.076882	0	0	0	0
PI(18:0/14:0)	0	0	340.0011339	0	0	0	0	0	0	0	0	352.6395258	215.7687502	0	217.4836297	0	483.2455507	1042.852189	0	0	201.0038554	0	0	323.176433	222.79839	442.2261465	247.5734313	0	286.6495981	0	0	0	0	0	0	231.4660494	0	319.8743042	0	236.554424	529.1560097	0	370.8522536	348.6459849	0	0	0	0	0
PI(18:0/16:1)	1046.360174	1027.371416	1571.050959	0	7229.666107	1527.682191	3834.596419	1765.607196	2907.283069	976.4766889	0	1560.567839	1576.260251	2798.319365	1023.338283	0	2142.146578	1573.231136	0	1406.152469	0	0	0	0	2085.108508	0	2180.290789	0	0	0	0	0	0	2083.64953	0	1444.688289	999.3899889	1696.318919	1054.53764	4702.004923	1795.89943	2704.599511	1577.773964	0	0	0	1049.604717	0	0
PI(18:0/18:0)	0	2324.719543	12571.72828	6270.124404	2983.730403	3553.275957	9716.382749	10081.9139	7510.547537	1453.072811	2066.712207	0	10725.55888	2541.737324	2800.583465	2603.389524	4068.984849	3624.663626	2086.671668	778.0730751	2028.558652	0	1505.535415	833.1645219	4483.76524	1043.650324	1731.886483	2504.712427	2728.616053	1946.703725	2486.312142	1680.631527	1041.564019	2987.211995	13193.11461	6950.224143	2809.40679	12620.17756	0	6936.488672	3610.173841	7611.116434	1318.423885	5711.477639	2479.881207	0	7734.898296	2316.989085	3437.28713
PI(18:0/18:1)	1929.938819	1368.975161	1744.706213	3179.398286	12049.72047	3440.507651	5720.857133	2902.599005	4378.701728	4625.27503	1330.257212	4344.648865	5850.974631	2463.249746	1981.835133	4607.962647	1032.828408	2083.725746	1526.595696	2181.49881	2039.187342	1172.711546	0	4541.917868	3048.293083	3323.075214	5047.774432	1234.780812	1933.106619	1528.280709	1227.953777	4743.200437	4719.938482	4123.996931	7908.987793	3631.196858	3641.972535	7158.594483	1516.77115	6003.370562	13675.37637	4237.801825	4071.65421	9743.011859	3514.501638	1925.104223	5136.449554	0	1549.537796
PI(18:0/18:2)	9361.901016	6168.732099	9448.356821	6767.019717	12708.50025	6251.955503	4762.66233	8292.568075	14853.57445	4310.638383	3350.822135	2514.895214	16963.77792	5727.494928	11211.9736	8505.108413	0	2223.201026	1597.672549	6723.048182	6115.352061	3932.039093	5536.179866	2562.514295	5000.798973	4335.003794	9334.512127	1807.840749	7423.909164	1662.847448	1792.757354	8966.030398	1075.861485	11411.47591	8284.801058	9846.03185	23967.69557	29072.40045	5661.209743	19138.1546	11037.22363	30375.75658	35826.80193	1973.592566	10110.84868	8274.517975	27033.1731	4196.838	945.9587445
PI(18:0/18:3)	0	0	0	0	5465.174162	0	0	0	0	0	0	0	1569.085415	0	1498.58764	0	0	0	1492.51579	1006.094856	0	0	1543.565718	0	0	0	0	0	0	1501.129531	0	0	0	942.850751	0	0	0	0	0	1438.720088	2103.880627	1053.52292	0	0	0	1053.772494	0	0	0
PI(18:0/20:0)	53499.00871	592995.4211	440899.9589	227583.1796	403064.6942	440545.8388	323932.5383	252175.5989	498492.7178	221128.0966	200658.7853	74936.40757	397055.4747	199090.636	207241.9065	277635.6401	694860.414	309742.7697	183190.7474	453015.6392	370202.3349	188205.3846	53646.98035	223559.9906	465062.6529	79087.79219	403865.7419	269051.6067	279665.5036	334152.5363	779340.118	496240.3948	36664.78675	413023.4815	288865.8746	553909.2789	477121.3861	521463.4502	28537.5489	774259.1871	600441.3665	443753.6113	419594.4346	301489.1045	570560.9383	10839.59582	419307.8821	462738.6006	352164.2289
PI(18:0/20:1)	0	0	0	970.0484889	0	0	0	0	0	1400.614104	0	947.8728942	0	0	0	0	0	0	0	0	0	0	0	0	0	0	0	0	908.2945849	0	719.6683653	0	0	0	0	0	0	0	0	0	0	0	0	0	0	0	0	0	0
PI(18:0/20:2)	0	3091.404868	0	0	2294.976343	1040.274198	1546.383654	0	0	1554.21767	0	0	0	2715.369592	1444.972839	0	0	958.9578802	0	0	2064.128676	0	0	0	0	0	2103.693042	0	1047.415966	0	0	0	0	1854.94332	0	0	2010.25877	0	0	0	1798.921257	2078.266917	0	0	2605.327962	0	0	0	0
PI(18:0/20:3)	3734.670183	9945.302992	5707.525311	10165.85135	10556.20011	3349.585552	7777.032222	3229.444861	6185.638946	18175.26411	4042.058606	7137.431219	7060.612352	6078.124985	3613.181068	3060.544346	0	0	978.8860869	3868.997273	4163.297295	2310.105615	5575.463092	2087.294839	3375.363339	2400.473547	5149.178516	2098.354462	2066.611169	0	2089.550967	6407.634905	4276.187832	6971.488027	7490.123472	7148.206716	17335.38895	7514.856255	2469.472919	13631.07103	34412.16269	6063.593039	11802.47496	3139.350888	7443.666604	2293.678186	2942.230226	0	4172.925925
PI(18:0/20:4)	21723.45288	23374.21928	38390.66195	30480.96671	128516.4078	40783.18395	15683.623	15470.37027	34276.99095	27990.988	16608.61286	58498.97206	149838.4402	17374.46397	66703.03992	17451.73775	3753.213732	4571.646855	1285.963036	12692.50312	4808.742719	3910.765196	1159.066762	10989.34721	51084.04021	13415.40924	49544.11363	3188.207899	4771.966728	9340.528556	2705.504169	19776.96569	32797.81028	29258.63917	54397.79469	59413.07774	134022.7529	24949.00644	17334.58132	61050.54677	89326.82156	124777.2158	76046.2446	118231.1822	33167.8007	11163.97803	27154.1039	2561.037542	14009.00397
PI(18:0/20:5)	0	0	207.0606905	0	0	0	0	0	0	0	0	237.5194369	0	0	0	0	212.1877311	0	0	0	212.4582963	0	0	0	0	0	0	0	0	388.4069186	433.9833919	0	0	0	0	1395.152127	0	600.6962515	0	0	312.5353949	245.890219	354.6149111	0	0	0	975.9646106	0	575.0523319
PI(18:0/22:4)	0	0	1040.689837	2594.011361	1571.589703	0	1885.734607	1033.68426	1541.435701	1042.043678	0	1530.97796	951.6674194	0	2419.89698	2603.724683	0	0	0	0	0	0	0	0	0	0	0	0	708.2741838	1082.731825	688.0418848	0	1043.488445	2057.462691	2588.837077	1851.292094	1316.121844	1563.600219	0	2377.981755	2094.071291	0	3110.658611	1904.040327	1042.143335	1010.172916	1042.335289	0	0
PI(18:0/22:5)	0	2088.963929	943.6010799	942.247613	2316.750876	0	1697.90431	2057.994786	2336.456087	1042.885613	0	1541.412098	1027.519089	1452.468635	1462.098723	0	0	0	0	1583.707733	1167.091371	996.6069255	0	0	927.9049683	0	925.1881578	1039.758952	0	0	926.8407231	0	0	0	2657.451151	0	1009.856949	1512.117716	0	3195.028649	778.5338104	0	1280.944492	2830.064305	0	0	1573.894258	0	0
PI(18:0/22:6)	0	0	0	0	1660.625005	2739.773775	5158.038645	1577.747529	1719.466837	1046.934262	0	2569.818614	1172.881634	1023.766793	0	1800.395495	0	1039.288135	1085.236592	1543.763545	0	0	0	1573.991586	2453.455708	0	1408.58845	962.8732609	0	0	1036.412641	0	0	1322.906014	0	1026.897891	0	1313.128024	0	4360.335766	3197.920511	3328.351031	7903.706178	3981.214075	2043.68618	1027.791965	0	0	0
PI(18:1/16:1)	0	2071.592442	1393.037443	1205.064759	0	634.7627833	2612.261455	1419.014866	1437.057521	0	948.0309591	1043.156062	0	3159.507687	2770.429155	1036.200986	1519.825492	1048.582761	0	1315.616705	0	0	0	0	2092.127201	0	1328.560318	1039.26893	1438.105621	0	1386.662827	0	996.748681	2434.699285	1021.182061	1842.566521	0	2663.005381	1449.197869	3895.114958	1040.620098	1272.046659	3149.618458	742.2959989	942.8495241	0	906.6729685	0	1961.208796
PI(18:1/18:1)	4141.846661	1359.102128	3965.469269	2384.237169	4202.086952	2151.152379	4219.828796	2984.669358	2061.804315	3497.639032	3940.480808	6844.975693	4862.740039	3842.511478	3727.060685	0	1928.260003	0	0	931.1473478	1423.297899	0	0	2088.606186	2429.183016	1583.825095	10617.60297	0	1214.086571	976.5033198	1565.335181	3072.857327	1394.349881	5161.879633	6120.285542	7188.084747	5576.579408	2712.256556	0	5753.66996	3860.731301	3204.194769	4087.681769	4932.964691	2614.274989	2101.590902	1635.826685	0	0
PI(18:1/18:2)	3581.652648	3964.406881	7138.85008	2499.447011	5219.871738	2102.872132	5399.674936	5283.033992	1566.99507	3044.955385	2450.177748	3553.923469	2862.935854	2224.768091	3432.554453	3229.769702	0	3087.238033	1428.155329	3654.871762	946.527336	5033.761483	3494.756623	3878.502212	2691.314982	2964.434942	6460.49505	1262.273906	3317.592009	1933.524207	3916.179161	2041.594265	3762.255626	3585.247768	4560.222456	7072.848651	6732.907128	8753.377205	0	4433.617332	3690.985162	2705.3868	5813.338486	2754.964418	2354.681537	5178.528732	2821.952422	0	3233.195102
PI(18:1/18:3)	0	0	0	0	0	0	0	0	290.999916	0	0	0	249.7211413	0	0	0	624.6085885	0	0	250.431482	0	0	0	541.8784169	0	0	0	246.9332994	0	0	0	372.1417552	0	269.7736809	0	0	0	0	0	0	0	0	0	0	246.7632635	0	0	0	0
PI(18:1/20:1)	222.5683767	238.5884562	0	0	0	0	0	0	0	0	0	0	0	248.775136	0	0	0	0	0	0	0	181.255016	0	0	0	0	0	0	405.923723	0	667.729632	0	0	0	352.4949859	0	427.3012884	0	0	222.3458858	0	0	387.9362999	0	0	0	0	0	0
PI(18:1/20:2)	0	0	0	938.0080425	370.00559	0	0	0	0	498.1501836	0	0	0	0	324.6667058	260.2297576	0	0	1048.098349	541.8682836	0	0	0	481.4923083	354.9723075	252.2097716	317.8515589	0	386.8277534	0	0	0	0	0	486.6712752	0	793.6368974	237.9013871	0	605.5598344	231.7971843	0	0	0	356.4756977	0	0	0	0
PI(18:1/20:3)	2466.741076	6920.958178	4056.328916	4508.497381	3071.986395	4061.293435	3539.472627	2964.448195	1965.969294	2247.632504	2999.630608	3116.653362	3812.452011	2370.421048	3862.565592	4361.685197	3015.320989	3932.154892	1416.739578	2392.341879	5675.841327	2749.342989	1339.487333	1986.449616	1762.120825	660.8408143	2404.77134	4272.127394	3338.678833	1473.613352	1713.205821	7443.902149	1710.380952	3480.645674	7261.052354	2452.066232	7828.308997	6146.040251	734.0946505	3859.521828	6781.586156	3296.073439	4421.999426	2802.248475	5216.113372	1705.223477	8451.345525	5173.872899	6297.720901
PI(18:1/20:4)	2136.056545	7312.127281	3501.865978	7832.808904	7853.821504	3265.374597	7691.890859	2037.972099	4721.062081	3216.336273	3416.966993	3795.935019	6876.922264	1828.165441	7350.465851	5404.144946	4450.312357	3052.061115	2226.722642	1504.757428	3250.700002	3048.480003	1689.022679	2814.164728	3138.564264	1973.718361	4324.735431	1357.446012	7391.374683	3595.811859	2262.215261	7765.246338	2041.980721	4968.088913	7244.646239	5805.581818	4592.293503	8435.650556	1645.786999	6416.275008	7516.573688	11277.30112	14572.59677	4828.971832	7996.181079	1226.272782	3400.417734	3857.598484	1321.988002
PI(18:1/20:5)	0	248.3857479	163.9156698	0	0	0	0	285.8317701	179.7975342	0	0	214.2669964	0	0	204.5564603	0	170.6253858	496.2914667	238.8636073	0	0	217.4528703	163.5889881	282.8298223	270.5625748	0	396.0304267	0	249.0184282	0	260.0429885	0	0	642.8763101	321.3170563	321.1684754	0	293.8353038	0	287.1030406	399.9555615	0	278.5358051	190.9340888	318.9947569	252.8738551	0	0	245.0861768
PI(18:1/22:4)	937.5699638	1098.721763	2598.017605	0	1512.494486	1013.505005	0	1033.844105	1028.823664	0	0	0	0	942.4131616	1925.149539	0	587.0492111	0	0	0	0	1560.350096	0	2453.668683	2026.11079	0	1041.644375	0	0	0	0	0	0	0	2584.986547	0	1479.051126	994.3163382	0	0	1491.261757	0	0	0	0	0	0	1023.375596	1023.893771
PI(18:1/22:5)	0	2338.137804	1174.249195	720.8391957	947.0275232	1816.992771	821.7038699	1356.801272	1554.485353	999.3191677	350.5963066	0	2179.040066	363.5255155	1941.975462	875.5708474	478.7625634	616.4428284	0	1616.00628	1141.70462	852.102675	0	757.4811962	1317.106394	401.7096573	659.8671044	904.8672523	1401.275533	667.2544818	1332.487632	2661.029124	0	2342.703734	2438.305625	909.1937494	1850.286057	1604.546266	0	2138.049958	1192.457796	1003.482194	856.6220638	2444.373765	1587.777993	0	2559.275104	833.942895	2382.821798
PI(18:1/22:6)	0	1641.715704	1666.012469	2298.058199	821.0641027	2551.384519	0	672.0819839	3381.941321	1564.964223	0	1940.415569	2569.847334	1380.735487	1160.852675	1366.211001	1721.624915	2603.865038	0	2233.485597	2366.057543	1716.265133	553.3087081	0	1769.211532	0	1246.733759	958.5099834	1938.63458	576.6390599	2238.127235	0	0	2240.316956	4656.421581	1247.791258	1946.757449	3060.982667	0	2086.026549	3996.393273	0	2158.696584	1587.45266	3375.639272	0	2124.935703	0	894.032614
PI(18:2/16:1)	44185.65819	280733.055	228126.9351	342750.9736	97023.56485	243871.9211	221823.2592	296886.4778	205505.2467	132671.8839	37572.33642	122524.6266	269751.6891	78108.15622	222980.9022	118854.0577	213906.2663	242163.8316	228639.9138	203668.7331	111565.6551	115863.9255	39999.1233	115309.5251	167345.5779	64585.56223	275356.0057	155990.2024	291509.4226	167599.1266	228665.5524	155787.8925	19463.40221	182991.2394	303943.8089	277919.872	302578.7635	351211.1823	27176.2229	235890.2553	293900.244	178653.0925	325148.5408	197138.9139	236934.2252	29824.29581	219153.6865	170248.6596	154024.3481
PI(18:2/18:2)	2957.287798	3382.630951	5327.32243	7989.856538	3667.685887	4458.287913	8025.404724	8947.890884	7654.996063	8282.840378	1534.050839	1308.18415	10229.12581	3302.16431	16505.56007	953.0265032	9162.543775	15520.76525	909.4176264	3682.442333	3498.642307	4288.321833	481.9841758	2456.561699	2534.115345	5083.521595	14895.71417	3913.621615	3776.408565	6400.761101	3623.64767	2335.655029	2503.623413	6078.596651	7525.17596	3720.77327	8405.825191	20972.20474	0	4431.159965	13085.40097	2385.560514	11054.76005	7087.130227	5579.781871	2510.913082	6211.428233	505.4437378	6414.052724
PI(18:2/18:3)	0	0	0	0	0	367.0516069	0	0	170.0723344	438.9420829	0	0	0	0	0	0	437.2689381	228.3718549	0	0	0	192.4777459	0	0	0	0	491.4312271	0	0	246.6504313	317.6511981	0	0	0	285.0217055	0	0	195.829495	0	336.2342227	496.2884976	0	195.8188281	0	0	0	243.8442398	0	207.6351057
PI(18:2/20:1)	0	0	0	0	0	0	283.2253159	0	0	205.2424932	422.9976584	0	195.2418717	0	0	0	0	180.4904775	766.8594477	170.4257357	0	0	0	0	0	0	407.139355	0	0	296.7571697	0	0	0	0	0	196.6756907	0	188.2621833	0	0	0	460.4173167	304.4341681	0	0	0	0	0	0
PI(18:2/20:2)	0	311.1328128	0	0	0	190.5281823	289.8558566	0	253.2587453	0	161.3880538	0	0	0	0	246.7497428	0	205.4578023	0	229.927381	0	158.4649504	0	0	351.223521	0	0	0	0	217.3692891	284.82679	187.4953102	0	453.9157367	0	0	0	442.8218842	0	0	0	248.6600952	245.8480196	0	326.0168692	332.834576	173.3160139	0	337.2101684
PI(18:2/20:3)	0	2463.585503	0	654.5399221	2288.014537	826.7985331	0	1282.542452	2226.365838	1150.891178	0	1123.664766	1658.293268	1039.051382	0	1406.930981	5384.751634	1862.505934	2141.350627	0	2352.075522	1525.676878	715.8022458	1809.527	1045.556065	2310.087561	1903.868112	0	491.6725713	1837.605665	1166.690076	0	1127.086511	972.3746586	829.2838355	590.5925208	999.1995615	1226.314208	697.413069	1347.698661	1594.716806	1339.535849	2776.542366	804.2197535	1890.717464	544.1649555	1918.565233	2260.977501	1869.209351
PI(18:2/20:4)	4146.757155	15952.23307	27535.21072	80287.83751	13124.49486	21514.03033	6020.806968	26693.08938	22435.42829	9590.093181	4774.191441	8626.351012	13763.83996	3353.055884	25554.73044	11602.82568	11080.54811	17539.19528	9069.141778	17652.09083	4868.189644	10365.01737	4467.743686	15331.34062	23958.18753	3816.977472	23107.87819	9122.370415	13058.41583	8074.348134	19637.88734	9709.123252	1493.852751	31343.95613	67573.4405	19741.23871	17223.35975	17794.24609	3730.002833	10311.15668	27855.63541	16499.03188	17310.16961	12890.25729	15434.6963	0	10072.19323	5637.103004	7769.497703
PI(18:2/20:5)	1691.537104	0	0	0	0	0	0	0	0	0	0	0	0	0	0	0	1736.047726	0	0	0	0	0	502.2659491	0	0	0	0	564.8212611	241.1134527	605.68102	748.8480165	0	0	0	0	0	0	0	0	444.3321962	0	387.7033521	267.4493591	730.3055484	0	347.7644199	0	0	0
PI(18:2/22:4)	0	0	0	578.5082317	0	579.5492095	572.9951506	0	0	0	0	0	0	0	0	0	1745.005886	1062.038583	0	564.2945616	0	0	0	0	0	0	0	2340.188638	1400.671463	587.4664344	1126.151231	0	0	0	0	0	580.9017911	0	0	0	0	0	0	0	0	0	0	1448.266092	0
PI(18:2/22:5)	0	0	439.73228	0	2772.171818	668.4527612	393.1371146	1609.731393	1048.066545	589.4625035	841.0842926	0	1309.171895	762.176836	841.6138658	0	2578.709943	1776.375298	1243.110537	804.7438977	482.9027538	716.2411033	0	610.9129581	504.063631	969.6447071	0	0	471.6565087	2308.57286	387.9199633	1254.55507	184.8252666	1359.250706	0	374.2271318	538.6664937	1172.517141	904.2517069	894.5116495	188.3322492	0	1210.053099	425.2226303	1788.410623	959.1218057	1018.89805	557.1894197	718.4222113
PI(18:2/22:6)	0	537.4389294	1501.89351	4392.211138	1366.046934	1604.228999	835.1680666	2072.092979	1364.475446	2320.805991	0	0	1099.763059	848.7998394	746.8822789	2198.308335	2616.087883	1188.456226	0	860.0516818	0	0	827.8553991	1420.044497	1741.112635	0	2697.007649	2991.75978	1385.505628	869.587517	0	1530.047796	0	3363.122733	3537.76987	1820.75759	1370.898282	1866.12268	0	3023.3982	2193.459763	551.6517776	2716.91956	603.8153665	1931.95851	0	0	0	1128.68031
PI(20:0/16:1)	0	3910.924775	4020.310468	3275.569954	4109.961203	3577.031561	8065.910982	4996.101466	5007.290053	3237.266768	1861.663699	1401.932153	5470.416863	3550.997366	629.6605873	1953.535137	3402.472515	3729.641861	2064.461436	2849.252077	6167.860047	3077.392176	559.423404	1341.473722	6201.525744	827.4199333	4172.901462	3683.928902	3161.842589	1764.379525	6084.819997	1268.983971	544.9649073	5493.074857	3472.0063	4729.259786	5439.720405	7385.068687	1099.523433	9046.60346	10124.46275	4179.630099	1630.474904	1072.803828	3718.830849	822.6291131	3389.450529	4885.120494	4235.953561
PI(20:0/18:1)	2601.574589	62287.4666	57706.24756	15955.15601	35643.95009	43261.58608	53692.06571	23671.1372	35215.92036	28466.31202	14799.17635	7470.085098	47041.0017	22907.54624	24830.84841	37609.22312	37690.88718	33389.3603	32277.51204	63093.25907	23765.6167	34178.27638	8642.750216	17035.20382	87026.55555	5229.470143	59146.27755	25240.89531	41699.86081	30960.05476	81496.52143	23392.96843	4864.125836	65542.13337	29007.48439	61297.2431	63522.75335	67139.71883	3699.806436	88742.24409	88610.58809	48487.64728	41439.27666	30924.6955	38849.89839	1355.668447	78265.10496	36758.03863	33332.96153
PI(20:0/18:2)	1325.58801	3921.533609	8367.291097	6889.702528	9098.087568	10524.26317	26840.55549	9815.645267	5472.125219	6943.650947	4607.822064	5046.03844	12607.37995	6691.406243	7980.784595	14329.87373	7650.546363	9580.197596	6556.734541	5083.855175	3618.924824	7948.39976	1956.88171	5262.976297	11585.44349	1372.476392	17284.07472	12737.22523	17176.47727	7457.963569	19872.58037	9760.032983	1453.93829	15201.62064	9971.659275	14098.49169	15005.37755	35663.51474	0	15037.18296	23735.3879	8065.302719	14981.35778	4857.025438	9061.912916	1342.194641	8869.297735	6065.070399	7837.273872
PI(20:0/18:3)	0	537.4411849	0	858.8060783	0	0	859.4318961	0	0	0	0	0	0	583.6412066	0	0	602.4268461	0	0	0	0	0	586.9678414	0	0	0	0	1159.921484	0	0	0	0	0	543.8029091	0	0	0	0	0	0	0	0	0	590.6429941	549.2300439	0	0	0	0
PI(20:0/20:1)	0	2168.833998	5091.211006	0	2044.165221	2474.234926	2230.713861	0	815.5357023	0	2872.220439	0	4398.450248	0	0	4412.333668	3479.33461	2021.161574	0	2286.438843	2432.606628	911.0223697	0	926.5344389	6716.046789	0	3543.832767	0	2760.859686	2896.055671	5324.148232	0	0	5106.816049	1254.474341	3476.767094	4309.44096	2958.280306	0	3032.475447	7423.399882	1154.678863	2279.175007	6202.645334	3294.606299	0	5938.926333	3061.911205	1227.826324
PI(20:0/20:2)	0	2131.357312	2772.067763	1134.135644	0	0	1918.075434	942.5465544	0	961.2998944	0	917.9516131	829.5748794	0	2399.219887	983.7172516	3185.586861	864.6774154	2317.4348	2504.939582	0	860.4722509	0	0	4650.941016	568.1778652	3991.361887	1194.473189	4170.355937	4049.085405	1949.426159	1058.204148	0	550.2192316	1125.534748	1802.745373	1824.517003	4201.190189	0	1371.908871	2759.92524	553.4048426	733.0854624	1851.557697	1110.003585	0	1058.599445	0	598.0097473
PI(20:0/20:3)	0	1347.853851	1182.827612	1985.461043	1466.249541	2143.302897	1412.983243	1620.183423	0	1422.068149	0	899.4538008	1947.992488	1347.055753	0	1895.445573	1638.96399	4535.738284	1798.912183	1157.061932	1842.023388	0	1236.176647	1778.578524	1211.594435	0	1501.622332	1580.59847	1399.642787	4593.518341	2582.947033	2160.197654	0	1416.190061	3542.554534	929.4690523	2257.325298	1317.254354	635.4965355	2557.235317	1925.616406	847.2816382	1337.228147	0	2031.740156	1310.923546	746.9518651	746.8019384	2301.929637
PI(20:0/20:4)	1133.973434	5689.01254	2505.442677	5858.068392	6074.853972	3833.386769	10552.91268	5890.939615	6938.388377	1853.096401	1995.11057	0	3509.620092	1530.95387	2778.807383	2014.969832	6683.6761	2702.603503	2018.5491	3170.886398	1513.321583	1868.676136	736.1361232	1338.772146	5312.265035	0	3116.952673	3812.356202	7523.500146	1932.299402	5165.47367	6006.532535	0	6202.604716	6424.898183	9937.803937	6356.386979	9880.040994	0	15357.30697	3551.922718	4004.379681	3379.864413	0	2206.813253	0	4334.819626	3633.408875	3742.188691
PI(20:0/20:5)	0	0	0	0	593.6919855	0	0	551.0482005	0	0	0	0	620.0723859	0	0	0	605.1754861	0	0	961.1471876	0	0	0	0	0	636.2985428	0	0	0	0	874.7285452	0	555.3018658	547.9781046	559.8457369	0	0	0	0	0	1328.24525	577.3555755	0	0	0	0	629.7180219	0	0
PI(20:0/22:5)	0	0	0	0	815.2676385	1059.60079	835.0053244	0	0	0	0	0	0	0	0	0	253.0307547	0	0	1111.318619	0	0	0	553.9713486	0	849.6151282	537.6583104	0	1187.397496	606.1322853	0	0	0	0	0	784.0237634	0	534.3526395	0	0	0	1079.124729	1133.844574	0	739.0234165	0	1631.853067	0	0
PI(20:0/22:6)	0	0	1518.227278	0	1015.385415	0	969.8042443	0	0	0	0	0	0	0	0	1622.097537	625.5689602	606.7020704	0	0	0	0	0	0	0	0	0	0	619.4468006	636.7204093	0	0	0	0	0	545.5584943	535.5075527	911.1951912	0	0	0	0	1110.681902	0	0	0	0	585.3919757	0
PS(14:0/14:0)	0	0	0	0	0	0	0	0	578.6794814	0	0	0	0	0	0	0	892.8829169	1217.073988	0	0	0	0	0	586.9614775	574.5629783	0	0	583.5048672	0	0	0	0	0	589.1150225	0	0	0	0	0	0	0	0	0	0	0	0	0	854.3858381	0
PS(14:0/18:1)	0	976.4860094	0	199.3004829	878.9481082	0	0	164.5208407	769.6452381	0	548.3115109	815.4265725	0	0	0	0	5146.862628	5146.615034	0	542.6457611	0	208.7712672	409.7999765	0	0	0	0	0	0	2716.548046	994.5417584	809.5501495	0	1061.449318	654.46789	461.1242351	0	524.2509777	160.706778	247.3470663	793.8408249	635.0800477	0	538.9414138	0	0	556.9716968	814.4923762	756.9758001
PS(14:0/18:2)	0	4881.439834	1418.826811	4607.563061	2065.721847	1418.182752	1667.069347	8067.010728	1705.860971	1689.709494	1416.62341	2009.168708	2356.973821	882.7594609	6253.97426	5943.02404	5146.845706	8174.026862	3028.47318	1765.705735	0	3230.590461	0	1572.792867	2621.319982	0	4080.872782	3782.001371	2643.130646	2395.49627	2655.206308	2890.666226	0	1727.284909	5033.634526	6388.012422	3536.533414	12213.66536	0	2048.422619	7964.647738	886.9406413	6077.140554	1631.680814	2949.386035	0	3803.289015	2912.531716	6569.112208
PS(14:0/18:3)	0	0	0	0	0	0	836.0453519	0	0	0	0	0	0	0	0	0	0	0	0	0	0	0	0	0	0	0	0	866.9579385	0	0	0	0	549.9885007	0	0	0	0	0	0	0	0	0	533.7382699	0	0	0	0	0	0
PS(14:0/20:1)	0	0	0	0	0	0	0	0	0	0	0	0	0	0	1003.492116	0	0	0	0	0	0	0	0	0	0	0	0	0	0	0	0	0	0	0	0	0	0	0	0	0	0	0	1452.998865	0	0	0	0	0	0
PS(14:0/20:2)	0	0	0	0	0	0	0	0	0	0	0	0	0	0	573.7359205	0	0	293.358598	582.7655875	0	0	0	0	575.9514028	0	0	0	1166.410022	0	0	0	0	0	0	593.119857	0	0	0	0	0	0	0	0	0	0	0	586.4917542	0	0
PS(14:0/20:3)	0	0	2067.864259	0	0	0	0	0	2061.82447	0	1543.492435	1088.265663	0	0	0	0	1177.438353	2626.471871	1564.083202	0	0	0	0	0	0	0	1165.791442	1535.205585	1491.785685	0	0	2060.139181	1012.187697	912.3097847	0	2874.166494	1008.323909	2043.799199	0	1015.518241	0	0	0	2023.091024	0	0	0	0	1020.201254
PS(14:0/20:4)	1039.031949	3014.109492	12628.94898	10194.75086	6109.941987	7177.986507	15501.66882	7964.168576	10769.03895	4124.544636	6707.32761	1553.143513	6088.909093	1402.592598	8975.572661	3949.837741	9384.755843	3655.970337	6502.305017	5926.825989	5959.61327	4375.999717	5042.904546	6377.09715	3210.678096	3121.794523	2065.574279	2526.671542	5886.192851	9213.427415	9851.910495	2420.786346	3632.29689	5603.72966	11083.03993	9592.424027	5981.284875	5057.730212	3034.681425	8851.654454	5570.119144	9903.533607	3478.513977	4132.770869	2389.670364	3861.786217	7737.034577	4599.766013	9756.809057
PS(14:0/20:5)	0	0	1566.865889	994.4016946	0	0	0	0	0	0	0	0	1041.353241	0	0	0	1051.398181	0	0	1511.884708	0	0	0	0	0	468.5736833	1049.058002	1018.09142	0	0	1003.762397	0	0	1042.869912	0	0	0	2060.792396	0	0	2037.819041	1012.949096	0	0	0	0	1039.700658	1026.976318	1561.311105
PS(14:0/22:4)	0	1516.054761	3616.168059	2949.327705	0	4116.352562	0	1732.958067	1031.088735	0	1514.723734	1526.441955	1999.828651	0	3592.178516	1030.930297	0	2611.777345	4122.479083	2570.730502	0	987.6250204	0	3998.017777	1537.418545	0	0	1544.574298	2523.404338	2035.02575	0	0	0	1519.278725	3465.317826	2565.327623	3547.632679	2055.023644	0	1022.626826	2061.628464	4063.765124	0	0	0	1002.427083	2594.713906	0	1511.327088
PS(14:0/22:5)	0	156.6676768	438.5633705	0	245.4972448	254.1242976	142.6012755	0	0	0	0	0	140.2415273	0	0	285.978137	2989.751035	1967.896422	1011.960262	0	0	233.568699	0	246.7754179	267.2966977	0	0	252.9517307	310.8595979	2395.679973	0	0	0	0	0	0	0	325.0238083	0	0	0	0	0	0	0	0	479.7582273	690.60501	339.0506228
PS(14:0/22:6)	0	0	2956.671979	1217.747555	0	971.5639714	0	1177.065857	2442.668499	0	1453.547929	0	0	1198.432245	0	962.6531191	0	0	0	2547.954753	0	0	0	0	0	0	1157.916402	0	0	1096.322549	0	0	1929.584697	0	0	0	0	1298.314861	0	0	1474.687306	2581.088908	0	2327.808993	2209.167339	0	0	1467.102178	0
PS(16:0/14:0)	0	0	0	0	0	0	0	0	0	0	0	0	0	0	0	0	0	1141.204626	574.5798387	0	0	0	0	586.2767628	0	0	0	0	588.1854713	593.3589157	0	0	0	0	0	0	0	0	0	0	0	0	0	0	1053.034085	0	0	0	0
PS(16:0/16:0)	579.7197384	1005.11613	0	771.8569881	1125.338572	0	518.791015	0	0	715.9422397	547.9971032	0	0	0	550.8013452	841.882711	1783.79117	3760.128547	608.4916717	745.9040522	0	0	580.7354659	587.6090764	1046.777201	0	741.3858397	0	0	600.9375004	2316.870578	561.311282	0	1559.371941	522.6829327	0	1726.713898	1287.399302	0	519.5306426	1530.2758	419.7561032	0	0	0	527.1403925	1152.911648	567.8128837	0
PS(16:0/16:1)	0	591.7169444	0	589.1506211	1182.546677	0	0	1161.58999	0	0	0	890.1489488	0	0	0	0	1696.077851	0	0	587.0622166	0	0	0	0	574.5629783	0	0	622.3232058	0	599.0725108	0	0	0	0	0	0	0	0	0	0	868.155046	0	0	0	0	0	0	0	0
PS(16:0/18:0)	6782.376178	14719.56317	10823.04487	21012.23043	4761.884841	13605.55148	35318.974	27780.3743	43700.37018	17418.71882	4682.97894	14073.11469	10582.71716	14891.65662	6252.090832	12462.31185	11247.21207	8263.040372	13056.32197	11451.06853	7936.713982	5878.274861	4462.770285	3363.702119	9685.738748	8884.56319	31278.02712	11901.56892	10399.70534	15881.23116	12483.21156	21204.50126	4059.87573	8524.687626	10691.15698	12030.67963	19797.94658	17205.98082	5748.664206	34786.79816	38655.85302	12892.00812	13424.72459	6090.812722	29986.85387	1042.823366	14262.49413	4112.873324	4066.235556
PS(16:0/18:1)	2061.662769	3397.214045	2263.426433	2606.553581	1397.242415	7063.33208	2692.458028	1897.008373	5678.915746	1356.420282	5012.709897	1044.56526	3532.34417	1543.645625	4832.542191	1755.412495	1728.30802	2374.877215	808.8051999	1478.457993	2508.20428	3525.761396	5003.478956	4215.459265	5818.53065	1533.933016	2474.902529	5645.145824	0	2324.516743	0	1612.879958	1050.04596	1051.15262	3998.894587	5389.853499	2392.309749	12887.85818	0	4057.896079	4035.82481	1545.436864	2617.551338	2634.676334	0	0	2451.792971	1542.051154	3538.665588
PS(16:0/18:2)	1438.737587	2797.693497	1395.4065	5014.831157	1564.428288	1425.364808	2735.738434	5902.735085	1488.688286	1055.771311	1543.898043	1264.3029	4790.420875	0	2073.948887	1034.39581	2054.82379	7705.526858	2603.017952	1794.930197	2988.402889	1003.17301	2370.949611	1567.103178	3276.469555	2016.530274	3303.126937	2374.37802	6341.181752	3135.176395	3544.423122	1569.865458	0	2195.914642	4025.344305	2242.843686	3095.844661	2009.105101	0	0	5438.641931	1493.337746	2034.859737	2013.937773	1532.733812	1514.502123	1873.392315	2026.873606	0
PS(16:0/18:3)	0	879.5361796	0	0	0	0	533.2180762	0	0	0	0	0	0	0	0	0	0	1189.228653	0	0	0	0	0	0	0	0	0	0	0	0	0	0	0	0	0	987.3626172	0	0	0	0	0	0	860.9865352	0	1843.563669	0	0	0	0
PS(16:0/20:1)	0	0	1457.985789	1017.676336	0	835.6389148	916.2792384	1073.627797	969.9732468	0	0	0	0	0	0	1441.066299	0	484.1764475	1045.699484	1498.770002	0	0	0	0	0	0	0	0	0	0	1540.757981	1926.001263	0	0	817.5503576	0	1113.559898	0	0	0	0	0	0	0	0	0	0	0	1409.795767
PS(16:0/20:2)	0	0	0	0	0	0	1293.668029	0	0	0	962.4366231	1162.187613	0	0	0	0	0	0	2116.393097	0	0	0	0	0	0	0	0	0	0	0	0	981.5273226	0	0	0	0	0	0	0	0	0	0	0	0	0	0	0	0	0
PS(16:0/20:3)	0	0	1970.565296	801.7312195	1043.816503	1546.218203	942.920893	1041.584215	1034.726234	1565.013424	0	1452.681066	0	0	0	0	0	1016.154623	0	0	0	1568.504559	0	2001.116335	0	0	2075.76566	0	931.7917885	0	0	0	0	0	0	1974.292052	993.6325239	2321.069396	0	2853.12136	0	1043.816503	0	1041.966036	0	0	1047.136554	929.2690708	0
PS(16:0/20:4)	1558.140611	9367.539859	7835.263791	10001.64941	3934.963685	12969.32688	11717.03708	12188.42176	12285.40061	6626.055362	2670.573654	1531.580521	7020.667865	2991.665785	1744.881217	1120.600298	14311.94844	9586.508323	3912.230577	7860.168923	3980.391152	3781.030613	5010.578633	6875.038006	11886.22002	3611.175084	6830.582107	5565.059142	7525.458029	5247.351619	6727.994632	2595.1896	1126.409611	6963.561204	19329.17818	19332.29602	9567.638206	14824.81084	0	12585.94636	10836.89315	8006.366103	6223.34942	2083.337046	7819.664851	5203.666915	3086.138469	2766.03641	5740.038046
PS(16:0/20:5)	1047.339299	0	1437.155094	1049.547316	2089.000888	1941.194769	0	1564.037974	1534.378064	2028.492316	0	0	2061.953256	0	0	0	1591.136702	1046.050829	1046.171042	1497.249419	1003.07574	0	0	1532.359841	2597.89378	0	1194.149702	993.8837597	1317.560775	0	0	0	0	1550.413635	4155.63613	1498.399211	1019.950409	1380.870721	1455.737069	1550.490541	942.2487793	0	0	0	0	1044.829943	0	0	2575.817921
PS(16:0/22:4)	0	0	0	0	822.0873318	902.8635991	1099.086702	982.0429537	2969.155699	0	1020.585033	1009.313844	1195.036584	0	0	0	4169.136619	3639.42667	2220.99848	1126.208865	815.4605026	0	0	0	0	0	0	0	0	0	0	1030.132308	0	0	1067.199442	0	2347.118649	0	0	976.9796255	1020.232032	0	0	0	0	0	1029.2501	1547.267479	1035.088583
PS(16:0/22:5)	1007.380365	1452.945296	3117.543195	0	832.1528579	1525.905244	2598.282674	2512.13396	5205.818143	1602.895166	1512.190213	1016.896346	2082.956139	0	2078.732817	0	3632.013607	2574.939188	4167.800049	0	0	0	1931.666042	1529.183785	1515.668562	0	986.8857132	2583.81791	2062.770317	2454.162804	1546.375361	0	0	1522.872877	2145.581194	1710.884718	1533.259155	1910.088772	0	3168.745669	1516.890129	734.7881234	2089.106787	1541.998793	1785.690866	1502.825457	0	979.3769182	1562.121662
PS(16:0/22:6)	0	0	0	0	0	0	0	0	0	0	0	0	1270.570448	0	0	0	1543.196747	2610.977602	1553.701872	1017.029399	1019.929237	0	0	0	0	0	1007.767752	0	0	1042.518428	0	0	0	0	0	0	0	0	0	0	0	0	1276.179629	1106.361869	1233.855223	0	0	1028.876404	1015.390005
PS(18:0/14:0)	0	2016.298567	0	0	3027.890146	0	0	2525.510723	2556.519629	0	0	0	3769.073521	1511.257537	987.5765758	2575.475382	0	0	0	0	979.050645	0	0	0	0	0	2169.909643	1023.982125	0	1045.362217	3485.229465	1547.566851	0	1016.104739	0	0	0	1501.973946	0	9074.338146	1521.893024	1008.684422	0	2529.931116	2031.385717	0	2062.419474	1536.440136	0
PS(18:0/16:1)	2610.444363	4558.576659	8248.045968	2084.036618	5228.339718	2582.240188	5229.238929	2525.7086	7741.663924	2543.534615	2566.412528	1035.55881	2206.272607	3544.031223	1946.602234	0	3591.579741	0	1045.212132	2131.475254	4926.81163	1524.981875	0	0	3336.376463	1539.491393	2068.505884	3116.679952	1006.033554	2726.304499	5014.732949	1950.543628	1027.092541	7322.603542	3050.6976	2557.123151	5140.941328	3863.497067	1039.964062	15056.33991	6891.123163	4887.362908	2610.549383	1036.069819	9944.610637	0	5573.410115	6159.430347	1025.666121
PS(18:0/18:0)	84376.98555	668098.6556	804198.3252	191407.383	437857.4507	842107.4247	443101.2045	264203.1505	1001730.712	270668.9592	478780.3656	63972.04408	805046.3289	477882.2316	233884.6811	287910.6513	619446.2363	205354.6827	276165.3107	530993.509	933936.7201	363073.6711	205248.8412	269360.0437	605598.9735	178080.1674	194607.9247	346427.5725	425314.816	430380.8963	566505.0922	353211.4891	128291.7646	861340.3139	226086.7199	485497.8507	697091.2793	412721.4731	56999.78601	1408939.276	460458.1782	833736.1273	162587.2561	1093285.899	1125843	28291.67976	467508.5733	865117.0652	358362.2561
PS(18:0/18:1)	10849.60756	71454.82092	104270.7971	22787.95354	55967.12666	101480.626	67572.7356	35477.64356	115879.5187	45977.79848	65899.4618	10419.08495	92471.23216	50929.63897	37138.76941	45732.04498	45411.54087	17468.48176	42433.83616	78160.00415	83322.20293	54855.73729	37014.43377	40732.46144	134998.0892	35104.29859	30664.09431	44962.1713	63994.18195	34371.77495	73629.54577	32008.78098	7299.786041	161118.5728	26587.70114	57405.94521	133676.0148	61836.28028	10411.29222	214837.0427	83014.48462	72131.25565	17157.41982	81288.87296	69537.39766	10425.22571	68300.07949	84380.14547	29251.56297
PS(18:0/18:2)	2584.465696	9325.619046	19003.37705	15177.34635	11869.57885	10113.08812	20824.79047	6877.466663	14494.39555	14904.08741	2585.614305	2472.009217	19218.01239	7292.338453	18832.88846	9844.829819	10758.59297	8410.249451	11777.7491	7076.720852	9595.450444	8169.800938	1518.536219	8907.277513	15028.39651	8253.107658	11352.23098	18123.72325	8758.064659	11520.71513	12529.23051	14124.41751	4147.573801	10960.69875	10480.34304	11899.29375	15298.37926	24322.76804	4161.514469	22269.15673	30612.46726	7764.998396	12595.60486	8164.096525	14991.0087	3065.746222	14382.74888	10543.2254	6800.638785
PS(18:0/18:3)	1117.925145	1365.188302	1326.007971	1823.830166	1498.650744	1091.570915	308.9910674	2062.041274	1827.247831	1184.819471	835.3379101	1916.669197	1223.235546	2401.02422	1796.971573	1619.576754	653.3801851	2372.130284	892.78552	1453.944305	1094.303411	1603.582962	911.5607248	1600.990736	2090.675918	1135.426157	2300.29591	2177.89071	3471.984988	1369.758907	2319.451144	2726.050294	1762.20236	761.0245098	1533.006098	1004.423273	725.5901631	1243.684555	1772.370688	1432.725583	2823.103631	1315.047575	1420.697967	1329.024709	1466.262115	1729.175557	3883.766953	1625.917714	1507.881108
PS(18:0/20:0)	7413.352365	47439.52149	33244.81466	19826.54456	93828.97534	45646.01208	22261.5238	61711.2088	40000.18334	17980.71748	25474.13248	15957.2388	35189.8662	14761.99488	77701.54705	22375.11057	61542.06533	28475.12683	12829.08389	18050.89356	20231.59172	18065.39738	8695.202377	17917.62429	46064.58767	11753.69472	34915.02303	50230.01904	28914.52346	28398.99446	127723.634	65968.23693	3437.455255	28580.28925	53304.31019	44653.38018	60054.13477	51372.79363	7191.235975	88594.24286	59405.35539	41943.64989	43149.00082	17404.3917	59815.56252	3496.384061	23070.57114	24827.24269	23384.08006
PS(18:0/20:1)	1039.989034	2106.105402	3499.613682	2606.214435	1017.393448	7271.08743	3649.595112	2084.230788	3115.505744	3130.165398	2080.161115	0	2083.852223	2084.922824	1038.896588	0	2092.840407	2093.189397	5751.381246	1042.075758	2075.012876	0	2594.037293	2562.618432	7817.148923	0	1551.770053	0	2191.434555	1051.699096	0	1558.950253	0	3648.466552	4171.627971	5213.96305	4689.353246	1817.499473	0	3129.16788	5211.891883	3641.34644	1564.571494	4539.702628	5213.523567	1013.992003	6251.827403	4145.369636	0
PS(18:0/20:2)	0	1541.110492	1570.323962	0	2074.17077	1559.340174	3623.908676	0	1925.491945	0	0	0	3588.971473	2085.632337	2028.66809	0	475.2731435	2087.464963	2093.036281	1545.504558	0	1033.230225	0	5173.687429	2082.915003	0	0	0	2060.146942	0	2577.347725	1047.190337	0	4164.765954	783.6656671	3126.859754	2441.674301	4692.55001	0	0	1563.391666	1043.488603	1044.159048	3646.681421	4162.358514	0	0	0	0
PS(18:0/20:3)	172607.6294	811725.0292	451222.3329	448560.6903	387790.8054	242493.9183	313133.5409	516274.116	459391.7637	264605.2569	207624.9357	311669.1291	325627.6872	383868.5168	233010.4117	268634.2577	537797.1782	549292.9163	256775.6436	330341.514	380192.7839	242782.4124	227110.4072	531555.2108	539713.8866	379148.9652	377336.2961	249907.3647	255774.5917	302402.1962	194450.8241	464712.9801	259326.0429	356684.8799	509251.9548	594945.1426	522415.4369	571029.4305	326932.8657	509772.1083	419791.8384	366709.6844	598697.3733	364099.6247	554779.8656	253977.565	594999.9442	153516.894	107462.2106
PS(18:0/20:4)	5742.477713	11369.28868	25459.81523	14128.98897	11962.02994	12967.71848	31061.59511	9736.48367	19778.3145	9900.707215	5791.254607	5286.106969	15100.98052	10425.02368	12857.00475	4702.01474	10872.70283	23026.8014	13357.85621	10367.68177	7492.96951	2608.121131	9915.608695	10429.63458	17547.30065	3631.411532	11787.67203	18666.40144	17912.34572	9598.192343	12232.74566	10231.51086	5221.479318	7792.72816	19725.30078	16529.50384	12090.09574	21690.50235	0	28300.91167	21957.26259	16098.33014	21253.08407	5619.668898	9019.316279	1795.816647	5079.14064	4604.909266	11908.46952
PS(18:0/20:5)	0	782.1680973	2590.24586	1715.048622	1618.034704	3204.940749	1583.495328	1551.260009	0	1019.808331	1232.245637	0	949.6240873	1880.033073	1191.07966	914.4456919	5096.186956	2302.378929	2069.833376	2433.883252	819.1604725	2321.41537	0	1060.820038	1206.282968	0	791.9881982	1650.861887	1055.867574	1007.816814	888.7488737	0	3020.788646	1499.802329	1426.09492	1747.734628	1811.171307	956.9714753	0	1098.901129	2238.810168	2386.644458	1248.09154	3037.353633	3312.101147	0	1013.624903	847.5300589	1005.820964
PS(18:0/22:4)	2104.344217	2284.803232	1299.134554	2539.941984	2290.235208	1636.517329	1108.69453	2432.591605	3340.964238	1517.255031	1002.880991	1661.981045	2455.776345	2491.979117	2097.33953	1196.059842	2022.03633	1272.116993	864.4977416	1260.298258	2407.547939	1943.306961	2587.192812	2348.519383	3907.06004	1870.015588	1893.914466	1369.324378	2828.913265	1472.276963	1543.436707	1952.955358	787.7034866	1621.843557	3114.343673	3574.509151	2294.703815	3088.022235	1258.38751	2536.451835	1197.120176	1444.966415	1527.768476	3078.7284	2555.77185	1661.511457	1684.26877	1275.403109	840.0363034
PS(18:0/22:5)	18990.5972	62776.7397	124658.2239	66158.1466	98741.05929	37831.61105	40658.91951	62078.75916	41346.00473	26268.9739	27818.6952	22753.11503	49873.68559	85834.53941	34339.90257	35053.27826	39999.7639	36233.24178	41050.08187	19962.01708	26453.91269	24567.7953	37872.26724	51605.73166	41313.86237	53658.89757	28732.48998	48042.47997	43877.78915	31128.22168	40054.12933	41925.80453	27884.04401	52536.15836	67097.77915	56414.30547	47950.80759	60317.40963	21561.75176	75837.18446	31061.6148	57282.1855	36096.25992	39453.68354	63172.36074	61735.2114	35097.05495	32056.53618	23417.31898
PS(18:0/22:6)	0	2619.258835	0	2005.25795	0	4222.601862	988.710589	0	3131.824818	3152.709463	1040.836903	0	2958.003912	0	1904.020019	0	2111.791696	957.1926231	1054.541499	2610.144956	0	0	0	0	1045.908765	1033.731024	2101.879497	1031.500087	1024.009221	0	2076.377105	939.5575962	0	2086.507909	3638.529759	2577.745454	1868.99287	4382.422137	1020.152857	3129.952731	2630.171258	0	0	0	2606.490777	0	1503.266349	1031.922478	0
PS(18:1/16:1)	4280.78159	7169.248854	10455.56496	12493.46387	7940.937986	9499.728811	11085.39611	3163.680646	11591.84474	4801.191249	3359.043823	3594.327029	3827.399291	4470.167976	12324.72377	3639.108014	10220.65262	8353.824374	3167.488338	8515.404551	3846.062418	2198.845855	4905.843902	2882.197397	4789.232785	1030.50224	6249.617667	4290.825362	11046.1825	4266.895428	7527.1346	5044.523458	2940.203454	7671.618617	15056.72594	10172.15523	7810.716626	6853.305213	1459.211993	10034.10413	6755.652582	3513.539497	7876.315344	1470.179928	4103.443925	3230.421743	8201.98391	2453.466863	4322.268671
PS(18:1/18:1)	2579.408701	5102.848765	7100.262354	6350.844897	2797.8284	6754.341045	5375.220356	10193.41985	2095.301315	5014.405519	1541.261637	6198.994224	8413.361484	1046.709499	0	3428.496264	2346.877829	8648.252573	6581.921922	1397.356145	0	943.9275117	1374.557927	2516.990204	1676.445468	0	2556.292621	3359.712408	1330.737997	3057.455717	7035.897754	3821.200584	0	2591.373104	6746.477019	2588.020853	5692.61704	8880.804234	0	7286.597738	5142.197616	9850.644499	6462.643937	3136.440011	2620.418295	4059.471259	2584.254956	2063.2048	3603.003355
PS(18:1/18:2)	7210.383852	7898.745368	17565.72932	30303.93819	9456.839591	12810.9707	10636.23691	16863.02036	9496.079624	17799.24891	2499.894078	6139.760641	17808.42155	1876.227203	21427.13308	7416.119605	15632.32372	37420.45339	7067.120327	5841.547531	4179.400542	5230.088077	2021.70433	1476.616008	11768.84737	5351.591604	21114.6144	18690.29336	15948.61075	3872.188995	6732.158514	7504.108152	0	13299.14031	20839.56106	4525.037461	11170.71399	24466.74501	1409.029186	21901.57288	21971.8562	11676.2264	23062.24336	5158.291266	4556.769753	6022.910576	4962.521234	1154.081326	11524.10829
PS(18:1/18:3)	0	0	0	0	0	0	0	0	0	0	0	0	0	0	567.0857883	0	670.0944169	0	0	0	0	0	0	0	0	0	890.9883126	576.3199563	0	0	0	0	0	0	0	0	0	0	0	0	0	0	0	0	0	0	0	0	0
PS(18:1/20:1)	0	0	0	0	0	1032.848319	0	0	1513.168341	0	0	0	1026.311677	0	0	0	0	0	0	1045.455056	0	0	1556.296316	0	0	0	0	0	0	0	0	0	0	1452.734803	0	0	0	0	0	0	0	0	1563.042791	0	0	0	0	0	1030.351952
PS(18:1/20:2)	0	0	0	0	1554.15148	0	0	0	1550.775882	0	0	1555.551047	0	0	0	0	0	0	0	0	0	0	0	0	0	0	1563.649022	0	0	1093.459137	1014.235398	0	0	1010.459868	0	0	0	0	0	0	1040.436808	0	0	0	0	0	0	0	1034.723234
PS(18:1/20:3)	1539.112689	2457.705512	6004.542412	1859.874798	0	1555.970053	2425.842812	3071.879989	2989.447363	1995.60181	0	0	2075.15415	0	6253.448723	2064.926197	5032.022627	1803.592791	1226.989587	1390.359966	1546.849012	0	0	1272.059063	4442.389329	1041.049782	2804.382135	3246.628913	6088.621071	1956.526063	1479.0135	1655.139501	1564.450442	1797.59243	2039.008923	1488.731823	2550.339078	8341.321168	0	4512.649951	4301.778106	4320.982023	0	0	1310.507642	1017.28901	3649.812007	1014.496276	2589.342171
PS(18:1/20:4)	5020.654107	53369.36034	38273.31176	64822.6038	29554.94807	35520.25897	69997.59985	62268.13403	76347.94054	22273.89229	12789.93048	11924.62142	53812.80119	7925.632187	60782.13811	9865.696225	73384.73223	48350.84011	27072.24932	27241.24464	9876.515076	15319.42725	11625.10602	21854.38122	50934.17085	13089.0367	46739.57582	42298.38946	52916.57056	39019.96238	23375.38324	25867.70853	5197.37103	36168.19166	54003.96125	52088.62967	41245.73637	74281.15685	5735.827959	51435.50136	64926.85839	44668.03108	31567.08636	10265.48861	24973.77867	10336.16168	15260.60991	15387.3646	42754.1711
PS(18:1/20:5)	1041.119995	4170.56574	1679.491669	3489.791523	1050.568929	0	0	3425.466376	1433.726811	989.5957964	0	0	1563.947926	1041.347904	2085.160137	1021.757998	3453.003173	0	3668.914091	0	1005.892811	0	0	0	3126.797311	1560.794253	3125.645552	0	6487.240948	3117.903183	3643.61864	1530.452915	1015.671677	1561.577154	1030.454609	2605.28248	949.3465893	5431.537925	0	3128.234285	4171.28548	2587.441691	1565.97567	0	3124.545514	1548.308265	1044.170595	2591.737087	1405.533485
PS(18:1/22:4)	0	0	0	1174.488678	0	0	0	985.6481956	1394.707286	0	3031.106466	0	0	0	8471.516435	0	5023.949589	8823.20078	3678.264676	2754.848769	0	0	965.3654594	0	0	0	0	454.4681147	3946.614402	3247.579722	0	0	0	1492.239736	0	0	0	0	0	1025.982428	1132.72431	988.3455773	0	0	0	0	0	499.1890691	4668.30205
PS(18:1/22:5)	3121.901927	4979.653256	0	7300.601716	1828.448476	4224.513805	1384.926344	8861.21485	2727.805819	1496.900344	0	0	3634.916864	2818.594421	7390.557844	0	2834.848589	2603.52612	1900.025037	1560.374768	0	1429.362186	0	1553.85558	3675.439961	1564.530884	2608.992476	2541.426311	3583.46355	4139.357495	2660.7225	2610.579423	1031.093287	3849.31051	6778.826302	1513.355928	4480.529636	3181.853589	1555.698109	2960.92301	7288.388633	1529.433648	1562.54461	0	5094.556803	5743.840773	2607.495564	1813.223815	1030.29591
PS(18:1/22:6)	2602.03594	6397.864611	10360.77627	8074.844003	1044.831421	6631.392249	6342.23064	4480.506083	9944.370191	6969.628713	2617.426699	1569.768045	8396.830417	4383.701882	2220.302732	2612.843213	15264.69197	6296.148166	1058.848729	6239.689591	5716.491379	1458.845368	0	3092.053337	7747.516431	1043.663575	2773.975448	4161.622257	4499.357133	3150.988012	11992.53629	5067.408737	0	9831.177237	3130.745821	3115.116686	8628.363875	13705.15499	0	11847.54412	11541.37645	4677.332137	6243.502733	4110.487438	5543.021176	0	1203.314837	4677.649702	2519.004846
PS(18:2/16:1)	6207.367304	10885.38042	25813.43184	24208.15581	10509.90595	13252.32709	30740.785	19397.65387	14023.3906	11880.1068	4710.289095	8889.104456	21408.21944	10013.14828	22789.13714	14370.42695	21617.00901	24390.41189	11865.13608	18507.19732	8722.047992	13435.25377	6378.247529	7966.369051	17856.28506	7204.866407	17300.46119	20932.62746	41307.60978	14360.25587	14120.81177	10632.89909	2775.105638	27324.92975	23989.19673	11624.01844	13538.4852	26305.55081	3639.023081	18817.05874	35173.35661	16886.08185	17187.47202	14402.18801	13413.66444	11208.12373	7510.478023	19130.10273	14223.5366
PS(18:2/18:2)	15508.31145	12457.35513	17410.10674	35750.10435	35423.88037	44394.48875	37403.61405	28631.56158	29989.79183	16197.47768	4041.348198	14664.61606	49955.07183	5180.42357	22176.45323	20184.30632	47130.68526	46872.25911	15318.47356	26284.58821	10809.64318	12429.41441	5194.036895	9571.30825	29954.32575	11713.19377	53014.02859	14316.71647	37705.3034	22176.67341	21747.827	35371.54398	2071.70982	32222.04257	24730.51519	58010.54367	47966.17648	42249.94022	2596.774941	61484.36583	41693.56257	24881.26516	55785.69448	17713.51645	17735.87073	16956.28279	31034.07525	16163.46854	18520.84158
PS(18:2/18:3)	0	0	0	0	0	955.6830214	0	0	0	0	0	0	0	1715.168815	0	0	0	587.9239351	645.9594353	0	0	0	0	0	0	0	0	0	0	0	0	0	0	0	0	0	0	0	0	0	0	0	0	0	0	0	0	0	0
PS(18:2/20:1)	0	0	655.5891741	0	0	0	562.5052836	0	0	0	0	0	0	0	0	0	0	1045.602599	1611.997736	0	0	0	0	0	816.4126063	0	0	0	0	1575.428966	0	595.543245	0	0	0	0	566.4776558	0	0	0	0	556.829931	0	556.0588849	0	0	0	0	0
PS(18:2/20:2)	0	0	0	0	577.5550646	0	0	0	0	0	0	1173.117671	0	0	0	0	0	0	0	0	0	0	0	575.3345335	0	0	0	0	0	0	577.4404413	0	0	0	0	0	584.5057961	0	0	0	0	0	0	0	0	0	0	0	0
PS(18:2/20:3)	2774.84418	3301.882616	13066.68578	8745.835243	4453.562624	10160.27829	6632.425723	5539.823574	16739.13303	7258.726695	1460.244061	1088.822704	3127.295349	2086.192185	12640.21995	887.2319608	18410.86282	12112.35687	3276.596672	1902.350993	5204.439723	5751.188887	1769.879345	2100.018204	5777.68135	5734.681357	5612.100094	3449.814202	11462.16724	5996.780155	4141.266539	15942.35962	0	5010.773583	8033.573601	8715.422961	7407.099804	15415.39902	1040.700205	14725.45909	8147.584955	4823.651734	6856.959009	2603.916867	2720.015663	3145.574149	7840.127775	3508.904601	2718.925197
PS(18:2/20:4)	16833.44521	39535.77987	40520.01892	88081.31516	47861.69726	42120.54916	106437.5166	63066.66969	88857.29165	25123.04089	32049.52885	10875.85703	77649.92613	36503.235	88024.11033	14338.82028	46676.94778	56984.35596	32795.26394	24183.09022	29257.29576	34339.95603	28039.97072	39143.55423	72044.62083	5945.397975	62166.03839	19959.60217	31040.32167	44560.34221	29750.34266	54245.74901	5120.319302	34322.26283	105364.9238	136043.9709	55087.39785	92944.18268	17386.69519	134865.2616	50188.10776	68189.72795	40760.48355	21868.79076	20187.39074	38016.15125	29075.29341	34851.74082	26378.52335
PS(18:2/20:5)	1014.249259	3101.232464	1572.472917	2084.197091	1576.212181	0	2373.702353	2913.116687	4490.264038	1540.103293	1572.023938	1416.258353	2057.642555	2036.387527	942.8594404	2256.400459	0	2125.770875	0	0	0	0	1048.886066	1040.765833	0	0	1025.302412	0	1577.060088	0	1493.844702	4565.791111	0	1928.167258	1051.836553	4204.126786	2623.573103	4037.762748	0	9365.445808	3168.47833	1046.421521	1053.915385	0	1016.917997	1562.892172	3146.945004	0	1004.857288
PS(18:2/22:4)	1023.316632	1842.349707	4187.507964	8904.794488	5329.844367	4249.036981	8023.300818	7989.448704	3741.103482	1016.562923	4542.199873	3538.18707	3870.889441	1540.774884	6911.273403	1039.40577	6571.211684	2692.811274	1429.284268	0	996.0001087	995.5500669	1032.326908	1788.389856	2611.955613	1001.324263	3708.815088	1534.818347	3985.212926	3130.248733	2223.135292	2304.493908	0	5669.036378	11529.85798	5007.525367	5499.836035	4520.746932	0	5215.422756	4940.035636	7505.077395	5539.494423	2498.51011	3255.073873	1909.853717	1943.768348	3421.561314	3895.742503
PS(18:2/22:5)	0	6465.073007	4733.967622	8645.963302	2892.263967	4179.609246	7172.475424	10159.1099	8162.910404	2312.084882	1385.973092	7140.387198	2802.195818	2977.97822	6142.369051	0	2874.563341	2125.75785	0	1949.060863	0	3987.911667	997.3988133	2435.510635	996.1612939	1000.250259	7675.680779	6426.394734	2268.979675	2290.127464	3988.959799	1855.99067	1517.015253	5059.765224	7128.661931	4988.427267	7086.660685	7078.712426	1510.28572	4285.069707	9094.269136	2895.903776	9204.769619	1505.818951	10620.94868	1656.889105	4513.105628	1685.920228	2741.032702
PS(18:2/22:6)	3146.868318	5077.60018	5379.705079	4846.842721	4539.876388	3991.818436	8838.155285	3545.478694	12767.29049	5573.048538	1801.098478	2553.575594	5491.010712	2375.61472	6850.815244	2779.161507	2155.032515	2474.91791	2490.469799	1517.316791	1681.045388	0	917.5537578	0	6770.77771	2439.905485	5411.472356	946.1830741	6725.068883	1680.71616	6977.77714	4313.787948	2101.826063	8796.942862	3752.23115	5093.082947	8411.026614	12847.94576	1552.58893	12742.27289	12672.05049	5519.60817	6934.126163	2237.733207	5419.97122	1042.147557	4036.310612	1560.434589	1600.864361
PS(20:0/16:1)	2009.841154	31518.09152	25952.29816	27869.22482	83906.21407	36083.89548	29014.03174	62697.10332	44027.41928	40252.67797	37399.94238	7010.421336	19178.48116	10932.62263	52308.40489	28345.2433	39635.37347	16703.86482	15949.91594	12956.29784	19449.94109	8510.849777	11703.51366	10487.80665	44917.85559	8338.385044	29288.59287	29271.27529	11218.87544	23860.46821	39045.4784	29807.86717	4380.764279	36223.39843	25505.27007	26221.31697	45039.30825	34714.77286	11098.00103	106281.4605	92591.97735	17579.10097	15238.53313	9097.817295	24117.76135	3852.25572	19359.10684	36342.41545	27895.8564
PS(20:0/18:1)	0	8693.434011	10188.09676	5596.560664	7940.634458	7223.152042	7577.693596	3231.667261	6032.386118	3035.881693	5093.740971	1262.010946	6383.377399	5029.957578	6654.954523	2287.691575	7914.50424	3712.587094	4825.468025	3003.023932	3002.793987	0	2000.562947	2001.189497	7270.174066	2230.499698	8018.874426	10296.58751	7483.293975	10793.26772	1241.22074	3924.093256	0	7614.545024	7419.532688	4482.200959	8557.140785	10864.12291	1559.660451	9871.240141	6583.932441	8043.022027	2100.350924	7935.82467	7564.454871	3015.67572	3440.611182	7996.05945	5896.939184
PS(20:0/18:2)	73514.80847	556075.096	356305.1443	339797.246	303165.4023	477906.0843	350905.7644	349168.3861	495621.1377	303727.6132	175631.1754	119974.9229	477184.9663	143141.2919	352929.7488	281941.1979	378274.5545	446182.7183	360562.6312	283475.5298	302591.8113	293407.1789	125220.4338	208649.9268	665864.0538	175378.8355	453823.6808	202258.7954	383582.3325	249074.7518	369241.9258	256137.4404	39065.91181	449055.6069	316460.6804	543096.3804	720034.283	688496.0096	53098.69841	682061.9912	774829.7928	348219.8064	385077.8808	189554.3581	264143.3669	64897.71065	469073.9646	399610.7556	400923.7441
PS(20:0/18:3)	2293.117335	9394.738459	1133.240359	8169.334146	23176.09985	3967.230199	12161.85073	7454.51577	7487.256314	13199.57792	1886.698128	3452.704987	8502.08344	3147.757714	8420.458247	5459.331636	5782.891095	6719.228116	5453.44686	4096.121591	8210.903071	5307.59137	884.0257002	3489.105731	8426.497565	1455.158833	9993.487906	8833.85898	2290.287556	3381.742537	1901.144055	3892.862747	591.4200149	3828.978083	11273.93118	13100.91796	7255.658769	14580.33385	4015.212911	18483.86283	22721.94772	1848.408809	9228.043435	1745.639106	5170.44295	866.7240042	4090.020853	6646.744361	3329.410254
PS(20:0/20:1)	990.7422538	1192.151015	3390.005093	1980.186671	1715.843872	2070.304125	3468.020167	2213.750228	2253.708042	975.0406391	0	834.4098489	1725.229247	1143.599931	1409.974549	903.4163168	1628.497751	1195.381243	1701.555754	2030.719978	1450.14175	0	2027.233194	871.0707337	2821.666257	0	3572.951613	567.9236591	869.028824	905.2097633	1151.998541	1212.231011	0	2583.150029	1313.625818	4200.285032	4551.956649	2816.210659	1902.825898	4027.450241	1362.606923	3154.936636	0	1396.813613	1718.89956	1131.248365	2328.35057	0	2283.166403
PS(20:0/20:2)	562.8901414	12975.25943	5641.619361	8199.269239	11237.3926	6562.64479	8714.025129	10134.58468	8685.610749	8720.268651	4231.991259	4352.692135	5310.956705	2089.776194	13475.27152	5201.380532	9937.635971	11670.95953	4937.742981	8172.609486	10305.5602	4644.67014	2384.750673	5201.862173	8335.358361	6322.755016	14106.03145	7351.163689	10766.76862	12214.12468	12214.07433	5765.054225	845.8403913	8976.915118	9011.873064	11064.25651	13702.1827	14339.92663	808.8606912	13132.52079	20846.7566	7804.979077	9979.003805	5711.346195	6432.06447	1927.129792	7532.631569	5751.686244	10192.59818
PS(20:0/20:3)	7659.972355	65892.58078	32460.19037	35491.65211	66647.00172	35549.20667	13660.14214	54188.08995	66429.26342	19133.68069	27648.62384	15355.48459	25395.68435	10356.66021	70736.76756	31546.84259	55779.73965	44929.0038	10610.31075	27726.75862	37700.16575	24696.89117	8390.33865	8184.947853	70047.78004	7332.082314	30903.83883	18230.35306	36162.68618	17116.00624	48535.63993	32008.24588	3717.345525	37454.70892	41073.13255	42182.09428	49904.35102	23155.72132	7076.357969	97030.82818	55558.23917	31119.48236	26987.98193	11209.67651	28158.10159	7427.119603	28802.81618	40656.07812	49802.29513
PS(20:0/20:4)	20872.32766	109183.4533	103962.9982	96024.98852	125655.7371	117895.7243	109815.5479	147994.0705	172920.4795	56449.31871	65360.32596	42801.94337	87092.04084	37511.81325	137500.6271	50119.25882	121265.7829	107518.7214	62978.50716	65176.61013	80478.31284	68637.94153	30563.79648	46120.17991	176432.2854	29803.80465	97726.84521	51613.81726	103905.814	98351.32829	104173.8986	66460.64204	5331.525055	104636.8898	95782.99864	136218.831	171502.2211	128936.3279	20092.46522	263955.4266	125518.1029	121017.0628	87633.551	43548.52494	77292.11437	15479.86073	59502.04526	81088.96759	110550.7933
PS(20:0/20:5)	849.5847309	5212.131933	3509.17975	5786.425861	9034.659853	2326.484454	7324.859999	6517.956782	15198.63115	2447.168632	1778.032653	1834.733206	2722.868706	1700.110217	3416.582195	2599.552355	5168.605772	3554.642816	2995.413337	1445.64912	1737.734882	1944.792324	0	791.1601619	3038.99337	568.1675414	4913.629887	5356.449172	1741.63588	1167.883193	4959.21558	4443.852632	0	2442.79803	6614.850563	3835.70088	4431.273577	4904.955498	890.9994222	13339.32658	8607.960589	3116.281721	3041.708374	2176.407071	2878.394108	0	3619.591806	1708.409076	2878.162359
PS(20:0/22:4)	746.9164733	6042.441145	4867.654135	4906.063762	10789.77192	6168.47921	4136.466637	4782.717822	8121.38891	2989.583818	3089.812245	1260.307026	7084.831612	839.0997777	8392.980998	3909.848077	9362.531782	8646.988661	1731.159233	7498.82819	4007.643196	3208.920758	2370.927791	3682.406199	14472.68637	1133.725688	6769.629651	5533.210562	5234.927522	8179.483423	5926.554598	5579.836299	660.4859703	6570.132756	6207.997791	9193.65102	7206.898598	6993.660475	2047.709489	7500.926925	9747.575419	3605.285695	6500.662955	2210.206299	5464.177472	0	4654.317258	6518.375702	7638.813591
PS(20:0/22:5)	1436.321898	13591.45141	5729.890776	9079.313554	12220.94412	5378.337799	10478.41102	14246.59766	22382.73545	6229.808249	3312.091791	6139.716927	12562.31901	3505.388528	8247.290723	4379.808431	14367.37238	10532.55391	6508.387562	9400.360848	7718.671651	13311.68869	1456.940735	5482.576392	18966.0291	3345.712638	6393.725088	3799.699303	6296.687038	6311.659334	7430.382825	4321.25459	641.1869889	9164.98972	6998.552195	13880.7104	16398.33741	10194.08546	3533.522829	22162.78891	26032.36265	7087.325756	14050.59079	3930.404439	8831.691828	0	8929.053244	10879.49868	9955.875917
PS(20:0/22:6)	2761.627055	19639.3069	16713.30026	5990.46413	13676.49791	17179.52683	16309.02346	12558.88585	23030.72232	19812.4996	9662.597248	6023.415816	21074.96004	12713.14984	8421.569609	12524.91939	15622.13859	19755.26159	9549.039812	13060.41882	15198.11329	10511.00131	2521.187489	5316.408286	32147.4148	4162.132847	17133.88826	13478.52707	20288.44608	9560.495488	34462.28394	11942.30441	733.8082816	23392.47097	6561.44035	17756.07264	30531.83663	38977.06757	1290.766214	47803.10962	51190.81215	18862.51652	16007.40532	7137.283553	18285.39966	1901.521146	25168.78836	17803.69443	13394.18597
27 OH cholesterol	0	0	2.845534217	2.007991342	2.067631597	0	0	0	4.015261692	0	0	0	0	0	0	0	0	0	0	0	0	0	0	0	0	0	0	0	0	0	0	0	0	0	0	2.362506594	0	0	0	0	0	0	0	0	0	0	0	0	0
Cholesterol	9926.424759	9935.612682	9912.830105	9950.792732	9941.492445	9964.465748	4550.736386	9958.708882	9969.170735	9944.822447	9953.676584	9925.038258	9962.225893	9929.715147	9925.802917	9932.814092	9976.708614	9962.188521	9939.284482	9939.472674	9958.619434	9917.180088	9920.224515	9959.751014	9942.105868	9937.881738	9941.290486	9941.500769	9921.637082	9955.838298	9939.072674	9952.552796	9943.199083	9958.912676	9938.020562	9929.472306	9959.288893	9948.836136	9934.866618	9967.458332	9890.742326	9947.666335	9946.212477	9840.653264	9954.640734	9970.946478	9921.517935	9951.555621	9967.761124
MAG 16:0	3.333590726	0	0	0	0	0	0	2.036087747	0	2.279083136	0	0	0	0	0	0	0	0	0	0	0	0	0	0	0	0	0	0	0	0	0	0	0	0	0	0	0	1.836741191	0	0	0	0	0	0	0	0	0	0	0
MAG 16:1	15.97697254	10.24304748	10.79294171	3.241014419	11.58189557	2.488248202	590.25717	6.318811448	2.230985025	5.692078979	0	9.974847926	6.779218368	16.36172417	2.945046048	7.196905256	0	0	14.56919573	4.886537001	10.86211456	0	5.265735553	0	9.219568326	9.094084235	3.426516167	0	2.94694618	2.675750475	2.463016829	5.575625959	5.168181223	8.180087325	8.573570148	4.688742649	10.94862172	3.835589902	6.55085922	2.35044692	7.722332288	3.009390267	1.989927675	8.383243523	1.61255883	3.281283009	2.842938201	2.667054247	4.791691494
MAG 18:0	2.761396506	3.673807648	3.608052571	1.571684559	5.951983296	6.512239111	607.339003	9.370538556	2.426440651	6.858257711	7.210366558	8.875598445	2.043718254	0	1.522074142	3.248364867	0	1.630093725	0	13.02240278	2.211435636	3.5336874	13.360732	0	3.407625476	0	2.797972541	9.527823908	4.538151516	0	2.888578994	3.299950116	9.868031061	1.509465751	0	0	1.545408207	1.340790113	4.995027414	2.135572542	14.21079734	0	1.881442501	7.87366174	0	3.454935198	4.457460005	2.435319464	2.568184565
MAG 18:1	6.359279408	4.380067942	15.38413755	9.813369095	6.14429477	4.801401936	481.8601198	3.231451856	7.094935639	14.39252299	12.20800439	27.08606371	6.217168206	16.46137736	10.9720667	8.015503951	1.30536808	7.203876247	7.00900606	7.901455604	5.510602064	38.67023136	16.16122319	5.457039497	7.297475672	6.933128462	21.87397655	14.7654324	14.91639673	4.39885615	7.570340639	6.213085135	6.00381836	15.38190077	24.43170518	14.98966963	3.170670304	13.40984514	2.800482157	6.99187435	16.26378737	10.15465673	24.49010048	20.17442493	16.52917773	8.032847438	6.487756127	8.290247301	1.945664679
MAG 18:2	10.32151563	5.346369427	5.68392647	3.819303561	0	0.885804525	0	0	4.243198671	2.115190804	0	2.218458011	0	0	3.784689576	7.344717093	2.262967209	2.488652819	4.592619396	3.640324897	2.212657608	0	7.704000227	3.350235294	1.767872243	4.878342652	0	7.663218182	0	1.718403316	8.536153344	4.725984573	10.34626529	0	1.909629618	5.372286141	4.349032771	2.821866217	2.223233407	4.567287181	6.392790636	0	0.825384083	1.256176873	0	0	7.410947011	0	2.21249631
MAG 20:0	4.75621199	0	1.233173257	0	3.364616029	3.278698318	671.3278948	3.057311226	0.604006566	4.089406314	3.907421619	2.256221707	2.60704518	5.237726802	2.560408168	7.082427516	0.465133748	5.554992795	0	0	3.663983403	8.184137979	3.740228028	4.86034373	0	0	0	0	0	4.686447256	3.112184047	1.732275949	0	1.621933193	3.97048002	10.18166342	1.257563097	4.700595972	9.149937039	0	9.038135583	5.901922342	2.879271268	6.660036978	2.99482134	2.406142888	14.81304585	0	3.830762418
MAG 20:1	2.150340155	0	3.352164541	2.984775578	3.756732244	4.366895295	259.3913621	0	2.009021396	4.558184915	0	1.711484782	5.080210996	6.374429247	7.744838914	6.090211109	0	1.364593103	1.864069569	2.458638825	0	3.65668246	0	0	7.462493927	8.571906283	3.05379962	3.297246468	5.590001069	1.728050946	3.371425558	2.026771895	9.753957131	0	5.454721359	4.842046577	0	0	6.673866538	0	4.253960961	4.31525595	5.68820192	6.660810415	5.445746231	0	5.450869129	0	0
MAG 20:2	0	0	3.339806254	4.653813752	0	0	0	2.47099526	3.012011732	0	0	0	1.701346792	3.192079359	0	0	0	4.864821781	3.554073545	1.889233686	2.138892486	0	0	2.430940143	0	0	0	0	6.137098033	2.352112547	5.776952171	0	7.823521873	0	2.464554919	0	0	0	0	1.834808757	6.99743755	0	1.948930314	3.572500283	4.977040403	0	0	5.074275645	2.182725835
MAG 20:3	3.377858662	0	1.861273749	1.838001072	5.163419121	5.169213518	0	2.398391608	3.378028364	0	5.39912252	0	1.396927652	3.594290887	3.042680097	5.683365276	0.799332526	0	2.076566663	3.640195577	1.711118926	3.59627924	5.482803535	0	3.550039062	10.83955834	0	0	5.590771261	6.561561065	1.926635633	1.706435634	0	0	0	1.965809169	1.177599512	2.781900035	0	0	4.370674077	2.673332726	0	1.767249092	3.770599493	1.21095187	2.96063149	7.331908533	3.27569019
MAG 20:4	3.957994928	5.183770873	4.912489685	3.103874266	3.153871956	0	0	0	0	0	0	0	0	2.216954775	4.491361211	0	3.262642468	1.378534819	4.549145094	3.685995814	2.422643975	0	5.686879551	0	0	0	3.641301895	4.910825558	0	0	1.909502145	1.684257527	0	0	5.127821202	0	0	3.64851141	2.961490318	0	0	0	1.894956839	0	0	0	0	2.298887469	0
MAG 22:0	0	0	2.82084105	0	0	0	0	3.050779506	0	0	2.733057905	0	0	2.287457656	0	0	3.378356213	1.389522707	13.34266508	0	0	3.025697061	3.840161219	3.942806069	4.494019787	4.493144277	4.600628253	0	4.203046987	5.189775159	2.886610426	1.805897426	0	1.806453889	2.729552365	0	1.563439839	2.819082419	2.224322969	2.775470891	0	2.932310599	0	0	0	0	2.964068152	6.026695473	2.183295047
MAG 22:1	2.253386381	5.411848739	5.509685475	3.065535836	0	0	259.4093881	0	0	0	3.990338684	2.216267177	4.234206833	3.192052695	0	0	2.294317967	1.390835333	0	8.175819778	0	0	3.84476036	2.386227247	5.960641561	0	3.20452671	2.818179731	3.732642195	2.868575608	3.593885453	0	0	1.970732707	0	2.420479857	0	2.763913741	2.651538541	2.180240212	4.52045867	0	1.552637964	0	2.492610487	0	8.794047542	2.926070307	0
MAG 22:2	2.234723435	6.132905706	3.452857396	3.288946111	2.065127642	2.67862377	516.8805665	0	0	2.279082879	0	3.801729957	2.521204192	4.162627933	1.98526121	0	1.146792745	1.797187172	1.48130954	2.456996391	4.857289776	0	0	4.759748479	2.371937677	2.308795704	0	3.494991174	7.459757592	2.253072611	2.366598178	0	3.864839621	1.535899886	0	3.632680537	2.162150172	1.881948938	4.191248258	2.266950941	13.98788834	3.654895899	3.550167379	3.885233161	3.769161023	1.221818483	2.869746407	2.382363536	2.154459688
MAG 22:3	3.377092133	6.129844105	2.846126109	2.046465477	0	1.298400295	337.5924715	0	0	0	0	0	0	4.784855385	0	0	0.463311107	2.083744766	2.384441258	3.66257179	0	2.835347101	0	0	0	2.923825406	2.300423318	4.557696865	2.900222708	2.790679575	0	0	0	3.969533391	0	0	0	0	0	1.474776949	4.578583187	0	1.948869807	0	0	1.191298184	0	0	0
MAG 22:4	0	4.092414562	2.805976701	0	0	2.312317376	0	2.84234208	0	3.120340233	0	2.206939822	2.551211511	2.419277169	1.108859727	0	0.533719159	0	2.996594684	2.456316434	0	5.415695413	0	2.434478566	2.384100633	3.019315902	3.202177694	0	0	3.112873545	3.847223223	2.637019222	0	0	0	5.415456481	0	2.803936789	3.526448658	1.851330186	0	3.910468444	0.855990786	0	3.767550464	2.124194116	3.304467564	2.925924571	0
MAG 22:5	1.732541837	7.544287726	5.683387958	0	2.014056859	1.742409591	489.9706012	3.203336359	1.815375132	2.059375771	3.990996842	5.236555965	0	0	2.534802435	4.943848612	0.457282856	5.278791229	0	2.650837014	0	4.856989808	0	4.557305401	3.104751109	3.623451062	3.387950086	4.512446921	11.14023704	0	8.572634415	3.366535498	0	1.959584149	0	6.008467728	5.465508224	1.872527529	6.065565894	2.698904142	0	5.229230287	0	10.57752435	0	1.104076846	7.392425954	2.875447655	3.104520975
MAG 22:6	0	0	0	1.991943766	0	0	0	0	0	0	0	0	0	0	0	4.26121438	0	0	0	0	0	2.819798289	0	0	4.76932342	3.018957216	0	0	3.732711708	1.913383916	0	0	0	0	2.729552364	0	2.345976726	0	0	0	0	0	0	4.014393961	0	0	0	0	1.974284296
S-1-P	0	0	0	0	0	0	0	0	0	0	0	0	0	0	7.95268471	0	0	0	0	0	0.421082251	0.698641507	0.154714862	6.069861696	0	0	0	0	0	0	0	0	0	0	0	0	5.089078882	0	0	0	0	0	0	67.58583253	0	3.363351604	0	0	0
Sphingosine	10.98233683	6.248954178	11.03752006	5.780548801	13.24392577	0	1235.235037	3.311072716	0	7.734028811	6.884107353	9.377574832	2.641848638	0	23.55230962	13.31934996	6.922161576	1.385832897	2.295831602	0	5.368745641	5.52672425	14.53424645	0	2.10428312	2.413752571	7.220240926	2.951369712	5.474934535	1.912159653	2.105584507	12.67336474	3.97230219	3.151732705	4.587850348	8.647884786	1.636057973	4.646614289	11.11936118	1.414004799	16.92082849	10.55220197	4.281641638	16.93564865	0	1.662622836	8.73366173	3.210185264	2.01510043
[truncated: 13 more columns]
