# Supplementary material for: Plasma Lipidomics Profiling to Identify the Biomarkers of Diagnosis and Radiotherapy Response for Advanced Non-Small-Cell Lung Cancer Patients
Source: J Lipids. 2024 Jan 27;2024:6730504. doi: 10.1155/2024/6730504 (PMC10838201; doi:10.1155/2024/6730504)
Supplement: Supplementary Materials — The original data for all analyses in this manuscript are provided in the supplementary document, according to the corresponding subgroups. The corresponding subgroups can be obtained according to the supplementary file name. [file 6730504.f1.zip › Lipid (pre-radiotherapy vs. during radiotherapy for Lung cancer patients ).txt]

Sample	26	27	28	29	30	31	32	33	34	35	36	37	38	39	40	41	42	43	44	45	46	47	48	49	50	51	52	53	54	55	56	57	58	59	60	61	62	63	64	65	66	67	68	69	70	71	72	73	74
Group	pre-RT	pre-RT	pre-RT	pre-RT	pre-RT	pre-RT	pre-RT	pre-RT	pre-RT	pre-RT	pre-RT	pre-RT	pre-RT	pre-RT	pre-RT	pre-RT	pre-RT	pre-RT	pre-RT	pre-RT	pre-RT	pre-RT	pre-RT	pre-RT	pre-RT	pre-RT	pre-RT	pre-RT	pre-RT	pre-RT	pre-RT	RT	RT	RT	RT	RT	RT	RT	RT	RT	RT	RT	RT	RT	RT	RT	RT	RT	RT
FFA(14:0)	0	987229.266	1159860.658	980076.8027	941655.2389	1012161.134	1081619.04	1090417.981	1144077.289	683927.9573	2258998.576	490167.8469	1084827.854	1034921.149	1058562.24	2363404.083	0	0	430777.3224	639678.9337	468712.8666	787018.8932	97274.16233	306629.2642	853534.1738	770517.432	488948.1716	0	0	663682.9733	1266318.902	1082747.504	720446.8869	712231.457	368259.6151	1002084.272	1044978.365	768414.0541	287247.3255	690822.711	779289.6216	2237319.573	916594.2262	1024380.243	972907.5132	1199096.519	1442970.035	0	0
FFA(14:1)	0	1036729.616	702191.3662	735387.5287	740293.7687	803661.2903	646399.6903	663825.4697	676663.9212	319969.3438	776155.2837	508486.9673	924767.2538	684835.9729	787978.1157	480718.3635	0	0	696123.7947	663175.8564	662152.1795	443153.3474	540333.4202	697241.4864	532365.7751	732481.3651	477316.8812	0	0	977844.246	895062.7228	490626.3793	510812.4985	1059209.772	1641163.344	693021.8818	743863.7966	593506.4224	602965.2047	1083257.743	391979.131	817034.1519	518811.0626	807609.9302	732032.1964	689805.0929	836103.3776	0	0
FFA(16:0)	0	8157551.074	14996505.43	8132615.8	52589399.35	15967506.92	6196825.179	9411235.668	5147960.696	6387393.072	19725938.41	11391971.32	16112127.57	17972192.75	12681752.24	19779668.51	0	0	5331445.017	11567680.41	6902217.838	9658726.585	4936766.705	7098303.761	8089638.295	12519014.9	7794123.52	0	0	7748261.827	17164179.13	11576427.14	14546107.79	14088662.41	4223536.485	5695313.541	13951499.08	5768575.349	6025320.563	15360406.26	7344914.832	15286300.91	4716593.841	9970040.649	6857759.267	5133584.953	21439232.55	0	0
FFA(16:1)	0	270120.6257	1070427.011	471595.0224	1331064.741	1172652.464	1362795.798	1783963.315	1332751.549	409065.4891	3749633.905	1059037.701	1234129.797	1417614.603	1065961.245	2685817.94	0	0	518190.1091	1770795.346	441141.2727	1541823.303	704297.4966	1408008.655	1479573.592	1634767.021	603161.3088	0	0	1083717.942	1489311.347	631634.4604	1258667.552	809118.777	78665.07151	156438.375	896817.8893	194378.9288	1112883.333	1428027.142	1118862.728	3374316.781	104185.3684	588058.777	457261.564	1341066.801	3586309.276	0	0
FFA(16:2)	0	374236.4603	749556.737	244078.6495	630368.9936	669449.124	733350.4429	212505.3237	740295.7581	265501.4376	530007.7901	312707.656	725534.6458	739514.091	688378.049	262839.475	0	0	253040.763	381804.5754	389856.2943	344379.6827	265850.7226	257179.4494	319704.2689	362525.3642	339807.1186	0	0	247666.9559	253682.367	298664.3286	314478.5398	722157.896	335491.303	368891.3567	728545.7234	215513.6218	368699.9288	453676.2325	363571.651	372204.7549	91799.10914	383170.8769	346356.4121	738219.101	282506.9515	0	0
FFA(18:0)	0	5537799.323	5781736.172	6353916.013	25074943.88	9804256.656	5320907.262	4175697.539	3673095.831	10171748.02	10297397.46	12640886.74	9651736.465	7977366.961	6878462.812	6780380.409	0	0	4905477.679	8545885.674	7657094.317	7667020.336	5270841.336	6125749.435	8570835.954	17751898.06	10748375.73	0	0	8473013.692	11443545.44	8254586.994	11847260.36	8442192.018	3804376.94	3928612.617	9277808.613	3507866.427	7862581.407	8169567.91	8043037.468	7267144.703	6142256.223	6347845.514	4098171.805	4936854.897	9553089.155	0	0
FFA(18:1)	0	15495893.8	30482530.61	15391167.74	74183584.95	34315105.3	11851420.15	20185019.52	6341031.739	16835210.88	33666249.12	36217246.42	30088485.31	39427661.31	23845537.73	25527368.02	0	0	10973436.12	31158249.19	11588577.71	22932279.92	20220873.53	24649292.71	30001155.04	38259339.52	27812828.28	0	0	18952343.76	30651039.35	20178494.02	44924411.67	31066696.84	6222336.794	9254260.946	21788848.71	8183063.045	18023214.18	22617078.91	26833176.84	34773361.07	6035769.168	21056966.31	18299100.17	4932361.003	50616234.38	0	0
FFA(18:2)	0	9735261.771	13895338	10019101.5	61491967.18	17438432.77	8196969.873	10115461.8	3380162.112	9353420.065	15532286	21729097.88	20408998.58	22001193.53	20122901.38	17487779.33	0	0	8063669.182	16250115.07	6563879.417	15493438.42	11485328.01	15158384.77	14874153.68	21126636.32	18290959.88	0	0	8900745.32	18819501.85	14796058.47	22456271.43	14862271.14	5936119.222	5974559.501	14027347.19	4424555.315	10380206.81	13007106.35	14875317.99	14044434.27	3807143.21	15870603.37	9166314.472	4187533.707	37566465.36	0	0
FFA(18:3)	0	534062.7728	526928.0543	513171.2468	8407620.974	866580.3872	823188.9262	676976.8187	214662.48	569385.9638	750006.3633	1093459.446	1106613.045	1324728.125	1760963.189	996450.5494	0	0	443310.6965	784536.5823	326174.1303	903729.3291	537914.8139	803541.5412	754375.7029	1047874.837	1041070.04	0	0	771638.5446	760785.0032	1442723.325	778933.2948	614651.4144	270371.0557	591459.4863	749029.4955	360574.4588	649724.7274	743237.0914	1195175.083	640887.6842	195503.0942	1110006.27	371413.2135	231482.8049	1740667.321	0	0
FFA(20:0)	0	2546677.524	1416873.578	2736114.575	1909654.306	1777739.881	2562636.956	2202389.838	3028682.108	1727484.304	1867396.497	5393311.028	2644531.179	1893201.813	2250236.735	1501382.322	0	0	439949.8541	900497.0055	1839986.556	1883807.991	1454532.85	1972671.995	1466775.908	3056615.258	1708111.625	0	0	435789.4309	1137817.642	1537331.079	1838814.476	1859435.807	1903807.441	2701339.34	1986775.745	1525318.455	1952611.083	2179033.835	1576768.696	757355.4221	2063791.205	2012312.855	2086835.199	2049749.673	1674059.378	0	0
FFA(20:1)	0	268590.8971	947698.1826	334840.1716	1789470.653	1065959.571	362888.4224	320790.4997	301837.4781	429228.9387	874088.447	1083635.253	1108834.449	833566.8906	363614.322	609213.8054	0	0	243758.5475	473805.669	168446.2355	379435.8077	452019.9174	376017.6289	665001.2012	1027865.71	1396834.691	0	0	441900.6308	770729.7706	393034.1904	1530406.781	989443.7763	155812.5956	284169.7296	543262.1942	174613.6988	518086.9526	325115.5915	761321.5455	616247.5548	342654.1663	746440.302	301203.6884	338539.1826	1011684.657	0	0
FFA(20:2)	0	201755.1238	417747.4546	271133.6331	1448705.001	514924.581	196688.9998	250402.2683	91320.55551	369788.0546	416711.3655	627650.6353	410121.4451	496387.5456	315047.7628	244946.5065	0	0	248449.3363	379142.5015	253920.5886	379159.7356	324737.0084	382778.9244	535756.4799	716726.3867	525958.6693	0	0	273415.9539	526249.2684	378320.9985	897852.4939	388867.2695	201440.1536	137949.8102	340496.8288	141108.8635	412940.7848	325059.1496	495584.9191	480899.7976	192334.2344	308250.4729	214032.3588	142491.2002	839875.6458	0	0
FFA(20:3)	0	400636.6311	433502.3652	511811.867	1000883.121	375061.7247	431389.8635	354071.5612	435062.8532	352288.3224	404957.9719	957456.095	413108.5531	466667.7884	398060.4496	407468.7885	0	0	280785.5192	692394.9433	363944.7012	491550.2262	734139.9818	774998.1186	490080.5898	889267.124	394316.3019	0	0	313531.5887	442747.3933	376313.6416	948297.9512	443128.3391	359412.7608	269179.7542	354014.1499	302834.2424	919758.6633	449942.9782	484789.2919	398951.1159	544200.9305	377092.4752	309743.402	382294.7449	812918.8196	0	0
FFA(20:4)	0	286216.1638	571516.7991	408230.7841	2298194.949	622048.8963	454973.5321	771360.9924	352659.9558	520668.5699	1115312.663	1164199.584	843933.5128	957971.8998	449920.1066	371860.0645	0	0	603192.4842	652349.056	719190.3055	1718856.202	732308.4767	992124.8494	964553.5093	1112341.535	823846.079	0	0	850695.9677	1054584.456	553282.052	1944766.679	482675.4311	353820.0488	383275.6219	428266.757	472701.4166	1309055.152	920199.3965	640975.3842	1415841.638	447515.6427	457546.3036	554665.5417	371989.3977	1072102.497	0	0
FFA(20:5)	0	245807.3502	223727.4018	1414676.724	217207.782	191159.2023	201348.0039	322825.3238	218951.1539	581929.5212	325163.2884	280547.3049	166264.7705	215485.303	228533.5645	215183.6174	0	0	264106.1737	372737.1032	1877641.388	328944.437	419529.9722	447788.8627	768995.683	935375.5931	757552.8703	0	0	554267.1494	340249.7798	168635.9814	202874.8671	224787.6154	255159.2333	292598.5241	204024.4317	205828.5958	123487.0572	222343.2251	707180.8194	243695.4601	618560.3608	176922.6244	230645.5793	228231.6937	200961.8896	0	0
FFA(22:4)	0	120813.6923	274484.0848	214080.203	955271.8917	282112.762	100167.7807	284404.222	87168.81298	295485.5523	379626.3088	619320.7801	260973.381	480986.6761	173243.8959	129445.1018	0	0	115887.0355	248768.3773	174054.6527	256162.5305	218031.2911	242928.0671	425010.9276	313092.2166	417035.3974	0	0	179103.1111	307691.4798	195622.3655	982956.1799	277645.2871	128903.7932	115621.9129	217622.9479	71656.27965	697625.3639	324703.3737	441644.3162	507210.0363	144294.2828	203546.0596	203746.4256	84174.28282	640039.1248	0	0
FFA(22:5)	0	119474.7132	488654.6466	105460.616	1219599.58	205599.6189	372425.3139	286058.1739	190579.4896	243706.6914	320388.4578	401249.9859	260217.2395	541181.7409	125375.7613	176812.0559	0	0	213352.5124	250497.2158	142793.9851	161206.6389	199719.284	234069.4232	210962.7038	224516.6156	322367.5694	0	0	348884.3128	332900.1047	197902.6125	618582.8701	329765.2375	67141.86854	347987.2064	114723.3008	99524.71171	442792.3563	320368.7027	337138.3062	242754.8758	95470.53048	150639.286	200445.3344	112227.0469	702951.047	0	0
FFA(22:6)	0	181143.8299	209241.9959	114431.6522	1360702.704	236863.6952	1163936.713	352931.5082	132817.7968	342790.8578	367985.9025	468463.1696	248859.0563	416879.1149	98863.17628	254989.5786	0	0	156355.7325	344994.7127	206250.8314	279619.4413	300832.1234	166682.718	295531.9555	330545.9298	358420.1191	0	0	168072.3281	448042.4614	205449.3208	364422.8473	225031.0453	66776.56457	113777.8644	151898.6612	210232.6253	297622.1168	240126.2657	451455.0615	219965.2338	160804.0728	172117.3204	280037.2047	38053.13955	572666.9042	0	0
FFA(24:0)	0	15865853.4	19605826.59	7995082.123	29232515.7	3389630.66	6146509.557	20387547.24	7371918.169	1483344	32651160.66	17542793.76	11366564.95	7149391.673	11123915.57	656750.6776	0	0	3999343.576	16461535.1	24003312.62	4688410.407	33691148.52	10990625.91	17961144.3	4188302.193	11897645.78	0	0	5944274.816	11659869.39	1720215.122	27433622.02	14297119.76	5760320.956	15161598.6	3171204.462	1221581.498	6672369.37	24681968.24	1495451.356	15041708.52	2054134.107	4976757.57	2542596.066	1853644.033	961236.1954	0	0
FFA(24:1)	0	192791.7918	471048.2311	257143.1653	257841.7714	351933.5627	102518.6429	229562.2719	42377.9752	323990.9001	273007.8607	839718.8614	365258.9012	117325.2726	41599.75158	191027.675	0	0	69351.5769	132327.9651	76122.35788	279036.7266	235349.12	332383.4742	443776.6285	677903.787	1007092.577	0	0	197894.9882	205724.6566	149397.1752	918706.3901	517415.2802	180022.3186	142441.3622	288714.0543	68422.64646	499345.3498	89927.5061	430858.3641	227888.7485	481913.1923	277297.4067	157376.8754	43415.72032	456247.571	0	0
LPA(14:0)	0	0	0	0	0	0	0	0	0	0	0	0	0	0	0	0	0	0	0	0	0	0	0	0	0	0	0	0	0	0	0	0	0	0	0	0	0	0	0	0	0	0	0	0	346.9782041	0	0	0	0
LPA(16:0)	1218.583677	5243.329808	1490.979943	1719.134426	2074.730118	0	1756.57505	1674.847509	2537.717687	987.221398	2326.66773	1280.266653	1556.142469	1229.896604	651.2544809	2370.252152	0	1011.954837	2845.444293	0	0	2112.233932	445.4341182	1134.626785	1332.078512	1336.981153	907.3801265	2006.979029	1011.954837	0	1618.243746	1579.010458	1988.311496	1031.739063	2985.827047	1346.338677	968.0114525	923.7168015	3528.920224	1447.937836	1283.636357	1522.37118	0	2172.350568	1360.832798	3314.521194	2348.277289	952.5938309	648.1414484
LPA(16:1)	0	0	0	0	0	0	0	0	0	0	0	0	0	0	0	0	0	0	0	0	0	0	0	0	0	0	0	495.1487392	0	0	0	0	0	394.3789646	0	0	0	0	0	0	0	0	0	0	0	0	0	0	0
LPA(18:0)	801.0189123	617.6490823	0	0	0	0	0	0	0	0	0	827.3816524	0	0	1484.589256	680.2821618	1100.672347	600.6263086	356.6076879	0	0	0	0	0	935.3607694	0	0	897.3975055	600.6263086	992.3076833	0	850.5085724	0	0	0	0	0	608.7659333	0	0	0	0	0	513.9337174	1131.231715	416.7976039	1020.476524	696.7237589	0
LPA(18:1)	631.2021495	0	0	821.3859477	547.4689404	0	0	0	0	0	411.4219262	822.0084722	0	0	0	0	0	0	0	0	0	0	0	0	0	513.5652321	0	0	0	0	0	0	617.0934494	0	0	616.0930074	0	0	0	0	0	0	0	0	0	0	0	0	447.2266462
LPA(18:2)	0	0	434.5072972	794.0424462	0	578.7130042	652.5732682	0	0	0	0	0	0	0	0	0	0	0	0	0	0	0	0	0	0	0	0	396.2770067	0	0	0	0	0	0	0	0	0	495.4890048	0	0	0	0	0	0	0	652.3550491	0	0	0
LPA(18:3)	0	0	0	0	0	0	0	0	0	0	0	0	0	0	0	0	492.2370303	0	0	0	415.2127133	0	0	0	0	0	0	0	0	0	0	0	0	0	0	0	0	0	313.5795	0	0	0	0	0	0	0	0	0	0
LPA(20:0)	0	0	0	0	0	0	0	0	0	0	418.1059543	0	0	0	0	0	0	0	0	0	0	0	0	0	0	0	0	0	0	0	0	0	0	0	0	0	0	0	423.0759644	0	0	0	0	0	0	0	0	0	0
LPA(20:1)	0	0	0	0	0	0	0	0	0	0	0	0	0	0	0	0	0	0	0	0	0	0	0	0	0	0	0	0	0	0	0	0	0	0	0	0	0	0	0	0	0	0	423.4278173	0	0	0	0	0	0
LPA(20:2)	0	0	0	0	0	0	0	0	0	0	0	0	0	0	0	0	0	0	0	0	0	0	0	0	0	0	0	0	0	0	0	0	0	0	0	0	0	0	0	0	317.3069394	0	0	0	0	0	0	0	0
LPA(20:3)	0	0	0	0	0	0	0	0	0	0	0	0	0	0	0	0	0	0	0	0	0	0	0	0	0	0	0	0	0	355.95	0	0	0	0	0	0	0	0	0	0	0	0	0	0	0	0	0	0	0
LPA(20:4)	0	0	0	0	776.5522407	0	0	0	0	0	709.1353947	0	0	0	0	484.82758	0	396.2615373	0	0	0	0	0	0	0	0	0	0	396.2615373	0	0	0	0	0	0	0	0	0	0	0	519.4049803	0	0	618.9597266	0	0	0	0	0
LPA(20:5)	0	0	0	0	0	0	0	0	0	0	0	0	0	0	0	0	0	0	0	0	0	0	0	0	0	0	0	0	0	0	0	0	0	0	0	0	0	0	0	0	0	0	0	317.3060502	0	0	0	0	0
LPG(14:0)	333.4314307	0	0	479.0111555	345.802712	356.9214909	0	487.9766456	0	578.8690129	585.6643188	855.8922787	674.3347109	0	0	816.3331123	452.9822388	565.8279154	602.2022951	0	0	0	612.1853903	0	346.9254469	482.9246373	0	779.1338167	565.8279154	0	0	0	0	350.1163948	0	580.9003817	0	0	498.7507418	344.6354927	355.6206353	0	0	0	0	0	0	457.0399099	247.6954051
LPG(16:0)	6715.792036	2168.208936	4746.326421	970.1133349	2208.429127	1865.155107	1858.854363	665.5030378	4191.634344	1778.348166	2216.950985	1248.326499	3178.649339	4898.829864	3665.411425	6546.194167	3590.728875	7267.303552	1196.310005	1408.957135	790.8074216	3390.931495	1140.950255	2605.639569	3373.642517	620.8995317	1448.934449	2608.507578	7267.303552	831.2768411	1682.346947	2227.408025	1465.267699	3753.008359	2760.215937	2736.574655	2554.088364	779.4692958	1620.121657	4390.541146	1313.004282	2053.744344	529.7353781	930.6513176	2637.831787	4394.446945	2733.491633	9252.879402	8689.164928
LPG(16:1)	957.9292414	231.779038	549.4625004	423.6738046	489.7484279	363.5775227	322.8677356	506.7126911	209.0456198	244.1106464	883.7497596	647.1652918	215.3181962	851.5746511	0	722.521564	1192.038619	1335.318829	401.2075806	639.7703874	454.6316371	381.9469557	539.1766379	0	618.9928906	351.9617541	222.342748	0	1335.318829	257.7504665	550.9644026	510.1660868	278.9827209	522.9001798	777.6077127	655.9427023	223.3088863	333.7176591	437.3089941	337.4254128	0	354.9936146	327.7159298	779.8750698	445.0707016	403.2898083	0	1736.366038	626.4393529
LPG(18:0)	3183.293057	3392.957753	1627.503088	3139.639609	5279.248979	2839.029609	3698.021904	4211.960927	3156.277982	2374.007551	5503.206869	3391.784213	5866.880648	2743.09224	5273.834779	5367.286926	4552.119347	3207.305235	2072.1818	1163.985516	2558.306757	17331.85854	2952.836453	5338.91037	6735.428197	6092.463054	2123.670084	2276.112883	3207.305235	1976.43715	4859.297194	2604.537	4007.465731	3444.198505	3344.575833	6647.028357	4836.124271	4772.950582	2277.256793	4031.498449	5024.088111	3268.931795	3350.700924	4939.220906	5148.961212	3280.427263	4430.130568	8996.841928	3884.320325
LPG(18:1)	12396.56723	15643.59205	13013.63222	19286.87124	23815.4573	16830.19692	7881.220275	11789.65231	9206.947528	9013.783196	14015.90524	11588.61323	16929.61929	18882.34414	12346.46486	14776.4308	12984.68404	25177.10586	6331.620266	11746.44503	8232.617482	21670.69153	11969.47429	13284.01437	23981.94147	17049.78771	8652.883625	6458.475633	25177.10586	11879.72246	16084.26181	6952.691158	8681.142947	9919.883816	20542.87822	23936.25673	17400.05382	8794.628063	20237.97106	7212.725614	11103.50452	22578.09188	9175.968875	15377.6599	16557.27257	11177.5757	15611.71226	16629.68373	11307.13512
LPG(18:2)	10327.70738	3736.523794	4703.665474	9292.953783	9457.372692	6290.087287	2655.095057	5081.719366	8476.223592	6322.668817	4862.718633	5549.664325	8565.384539	3832.533522	11132.32727	12706.05708	7857.871485	11087.72182	4275.31571	6668.543035	7459.747211	10219.55411	4007.61802	4295.881774	13755.92922	6166.169466	7096.272605	4880.182351	11087.72182	3077.000766	7217.589642	4824.299377	9907.494788	2971.88358	11002.2408	11722.20872	7116.935652	5520.538307	9324.884881	9030.956711	9658.184611	5548.071332	4568.706938	8994.467376	9833.148197	7296.568584	5284.137188	5975.067147	11164.664
LPG(18:3)	1882.060485	531.2922051	209.3022926	744.695773	747.5729899	536.9203749	429.1687088	2253.484298	338.3868649	320.2660025	576.220075	0	461.803837	641.2158504	390.9495463	449.4742464	1117.503769	746.5730708	996.6164802	1202.207289	882.1233826	385.3243584	599.7314967	2237.728427	669.3609873	0	731.9773803	906.3768091	746.5730708	866.1000322	691.4882496	882.3798948	625.9228322	0	1113.517999	491.5892917	369.7905604	0	241.3077208	802.6039916	1333.141077	214.4650216	229.0759875	611.2207208	0	685.0217208	514.0983587	1116.057156	488.5980143
LPG(20:0)	539.1930841	287.2649961	200.1648861	406.4652024	493.5134539	0	288.3873574	427.6963765	221.5294298	0	575.115155	0	0	0	298.721038	0	957.3608504	445.042298	0	0	404.6897073	498.2861678	597.0850657	461.6283885	0	700.0692336	397.6900994	0	445.042298	448.156912	507.0763491	462.5522072	285.1968197	0	257.0053427	171.9490707	0	412.7870541	374.6891909	463.1468341	287.2408992	310.9359195	0	0	571.8893316	604.448051	0	545.7795504	827.1647155
LPG(20:1)	607.9805692	0	0	0	0	0	0	1579.567941	0	0	0	1053.518547	0	1049.405121	2159.009335	521.6649449	1516.539694	301.2377304	0	0	0	0	0	0	0	0	0	606.3291508	301.2377304	0	0	912.3390586	0	0	0	0	0	0	0	0	1015.601185	0	0	0	0	799.267336	0	288.0116916	311.4220692
LPG(20:2)	961.3391801	805.5055237	660.7140746	1474.411205	2593.741443	1078.238705	816.614338	0	909.3356761	378.9499693	1678.296317	1172.029147	1503.70298	1791.485352	1105.552664	790.6952864	409.2717933	443.3996285	935.9027603	316.1363473	552.6483166	649.97016	735.0165794	762.6043864	1398.675185	471.6061609	987.1022784	1200.041486	443.3996285	318.9647314	900.5915226	949.0672959	777.8100789	1126.887421	2204.009302	449.3693148	261.422232	273.155761	545.8543214	1397.723155	723.564997	567.6663821	1003.758142	884.057891	843.1827692	530.3375134	1028.23149	952.2267279	897.393397
LPG(20:3)	838.9390211	333.8327004	0	434.2890819	686.1459714	426.26482	628.3413066	825.9442378	1397.161488	1520.981924	934.3750344	580.743454	1467.844902	793.0695671	714.9904124	760.458729	402.3290112	907.7147822	635.7050927	173.9515052	0	1310.005305	0	0	1205.151127	366.2914035	0	390.4346726	907.7147822	341.1141724	218.6004842	824.6746466	1119.774779	698.1411279	1234.503734	1050.453461	0	0	0	1004.511474	405.5549852	290.7132644	382.7799287	239.5181583	538.0850064	686.3834721	0	679.3907825	957.4267889
LPG(20:4)	645.0895122	1038.099245	430.3196355	645.7521265	652.7003753	0	247.3348856	241.2722594	343.8755217	0	0	242.721116	327.7923607	434.8821425	514.2681623	322.6205119	0	1035.957535	0	496.8495654	0	929.9819187	0	405.3148969	0	319.5149998	0	848.8038309	1035.957535	0	184.9097142	337.6625663	869.4059047	610.364353	1436.419767	0	503.4875886	563.5091296	2115.422537	0	0	391.6583418	247.8960445	597.2510724	774.7743183	838.5002901	551.5851696	0	978.1606728
LPG(20:5)	1005.193156	790.4445021	188.8871792	500.7881459	526.4222867	253.0528833	454.8662302	626.2755636	362.3035205	0	742.2808838	471.6336645	331.0147881	440.3755674	340.6860418	1162.854822	793.6151601	529.9773698	190.8130344	0	292.049673	0	715.4588832	839.1768959	387.7961985	253.0733316	797.0771031	445.1880434	529.9773698	422.2840175	936.9813271	400.1014318	309.3015701	266.03348	320.6086797	1131.644594	266.2923257	482.803532	0	686.4655908	393.0232524	257.4489761	1161.291219	396.6417856	619.2007705	417.4012511	271.1211234	989.4021201	570.5786956
LPG(22:4)	504.7649379	369.1134957	259.0973249	305.895357	353.2480327	524.9308746	417.8649176	680.1217917	522.4680221	0	0	295.5006208	528.4543859	394.7081541	321.378915	257.4325577	908.7734571	779.8106074	464.9485965	266.4002285	475.0252559	499.8085893	0	539.1676985	531.718581	379.1599585	560.0775682	527.9312876	779.8106074	343.8506369	431.5621512	259.944904	721.9117072	315.1756426	973.5211512	674.5234627	416.6975846	428.8220793	997.8253309	625.840755	512.5347246	371.8386611	556.0684894	0	636.3047436	649.4939287	506.416205	346.1313164	329.8531247
LPG(22:5)	621.5459223	996.1441059	921.0195624	741.8336965	1312.678935	828.6352518	636.6206998	1534.328434	1015.291077	0	631.8826771	1527.002402	827.0250611	574.785353	1399.659648	657.4404359	0	0	361.4974382	288.8479975	287.6766071	446.4132872	620.1703925	657.9820641	479.0834901	477.1540082	0	0	0	401.1396309	740.9943212	660.2809071	867.957163	1664.969647	536.0046293	0	716.2354326	658.1219008	739.0659786	674.6120003	612.1054859	335.3665681	799.74392	765.0599951	798.8432771	553.3158373	432.9089152	724.0477354	362.6593397
LPG(22:6)	621.9055824	602.1930444	500.2657914	363.538378	829.4104015	496.0484388	469.856287	585.3980179	502.9463936	0	480.4639668	781.3804931	824.2081545	0	727.8310022	794.7478727	0	0	0	0	709.2606879	511.0803394	0	364.0935092	517.043123	0	481.1441913	1158.881481	0	134.3115579	443.6492326	346.0955816	352.3121943	704.1225465	349.3091769	518.2815887	1046.309113	351.8032521	477.6103566	0	901.4574183	714.9242419	0	471.9652632	474.0265055	488.4715735	496.4183239	842.878387	0
LPI(14:0)	0	0	0	0	0	0	0	0	0	0	0	0	0	0	0	0	0	0	0	0	0	0	0	0	0	0	0	0	0	0	0	0	0	0	0	0	0	0	0	0	0	0	0	0	0	0	0	0	0
LPI(16:0)	1636.504279	0	0	0	0	0	0	0	0	0	1190.402964	0	0	0	0	888.4125317	0	2021.054318	0	0	0	0	0	0	0	0	0	1181.269411	2021.054318	0	0	665.3360729	0	0	0	0	0	0	0	0	0	0	0	0	0	0	497.2475869	1980.688254	562.756597
LPI(16:1)	0	0	0	322.8966904	0	0	0	0	0	0	0	0	0	0	0	0	0	0	0	0	0	0	0	0	0	0	0	541.3435555	0	0	0	0	0	0	315.5782473	0	0	0	0	0	0	0	0	0	0	0	0	0	0
LPI(18:0)	0	0	0	0	0	0	0	0	0	0	0	0	0	0	0	0	0	0	0	0	0	0	0	0	0	0	0	0	0	0	0	0	0	0	0	0	0	0	0	0	0	0	0	0	0	0	0	0	0
LPI(18:1)	0	0	0	0	0	0	0	0	0	0	0	0	0	0	0	0	0	594.5744833	0	0	0	0	0	0	0	328.9608081	0	0	594.5744833	0	0	0	0	0	415.0284636	0	0	0	0	0	0	0	0	0	0	0	0	0	0
LPI(18:2)	837.8383111	0	0	0	0	0	0	0	0	0	0	0	0	956.9366625	0	0	502.7118999	501.7012826	0	0	0	0	0	0	0	0	0	0	501.7012826	0	0	0	0	0	0	0	0	0	0	0	0	0	0	0	0	441.9290532	0	0	580.8714023
LPI(18:3)	0	0	0	0	0	0	0	0	0	0	0	0	0	0	0	0	0	396.0669053	0	0	0	0	0	0	0	0	0	0	396.0669053	0	0	0	0	0	0	0	0	0	0	0	0	0	0	0	0	0	0	0	0
LPI(20:0)	0	0	0	0	0	0	0	0	0	0	0	0	0	0	0	0	0	0	0	0	0	0	0	0	0	0	0	0	0	0	0	0	0	0	0	0	0	0	0	0	0	0	0	0	0	0	0	0	306.7712411
LPI(20:1)	618.469155	0	0	0	0	0	0	0	0	0	0	0	0	0	0	0	0	0	0	0	0	0	0	0	0	0	0	0	0	0	0	0	0	0	0	0	0	0	0	0	0	0	0	0	0	0	0	0	0
LPI(20:2)	0	0	0	0	0	0	0	0	0	0	0	0	0	0	0	0	306.6824899	0	0	0	0	0	0	0	0	0	0	0	0	0	0	0	0	0	0	0	0	0	0	0	0	0	0	0	0	0	0	817.8084462	0
LPI(20:3)	0	0	0	0	0	0	0	0	0	0	0	0	0	0	0	0	0	0	0	0	0	0	0	0	0	0	0	0	0	0	0	0	0	0	0	0	0	0	0	0	0	0	0	0	0	0	0	309.8387688	0
LPI(20:4)	505.308203	0	0	0	0	0	0	0	0	0	0	0	0	0	0	358.1394552	0	277.9896609	0	0	0	0	0	0	0	0	0	0	277.9896609	0	0	0	0	0	0	0	0	0	0	0	0	0	0	0	0	0	0	0	0
LPI(20:5)	613.5703688	0	0	0	0	0	0	0	0	0	0	0	0	0	0	0	0	613.546762	0	0	0	0	0	0	0	0	0	0	613.546762	0	0	0	0	0	0	0	482.3960283	0	0	0	0	0	0	0	0	0	682.4188126	0	0
LPI(22:4)	387.209428	0	0	0	0	0	0	0	0	0	0	0	0	0	0	0	0	0	0	0	0	0	0	0	0	0	0	0	0	0	0	0	0	0	0	0	0	0	0	0	0	0	0	0	0	0	0	0	0
LPI(22:5)	0	0	0	0	0	0	0	0	0	0	0	0	0	574.0103902	0	0	0	0	0	0	0	0	0	0	0	0	0	704.6600959	0	408.8642981	0	0	0	0	0	0	0	0	0	0	0	0	0	0	0	0	0	0	0
LPI(22:6)	0	0	0	0	0	0	0	0	0	0	0	0	0	0	0	0	0	0	0	0	0	0	0	0	0	0	0	0	0	0	0	0	0	0	0	0	0	0	0	0	0	0	317.2188118	0	0	0	0	0	0
LPS(14:0)	0	0	584.8156109	0	0	0	0	0	0	0	0	0	0	0	0	0	602.4873378	500.5213018	0	0	0	0	0	0	0	0	0	600.2641974	500.5213018	0	0	0	0	0	0	0	0	0	0	0	0	0	0	470.3730907	0	0	0	907.7767036	500.0508348
LPS(16:0)	1042.117002	2458.807711	826.8604516	1615.152741	2904.809519	1918.637084	2572.128511	963.8801149	1743.205907	1142.087562	2270.461309	2505.618212	1844.877708	3490.396478	1483.299027	2274.725278	0	512.2162433	1760.396347	0	1237.114326	2574.721737	567.2826705	1850.799687	1229.532481	2128.991152	1572.695376	995.1893063	512.2162433	1386.530313	1751.328868	1386.020513	1733.815121	918.4469855	1752.46992	2552.195616	1795.483425	2265.295557	2079.930826	2188.300868	1881.332604	1653.531545	0	1278.680881	1668.496779	2475.849286	1297.969536	0	420.0121005
LPS(16:1)	0	0	0	0	0	0	0	0	0	0	0	0	0	0	0	0	0	0	0	0	0	0	0	0	0	0	0	0	0	0	0	0	0	0	0	0	0	0	0	0	0	0	0	0	0	0	0	0	0
LPS(18:0)	1317.346642	723.0689803	0	727.4697683	1327.367605	0	1067.669855	0	0	0	837.2341863	1359.302071	878.0773705	0	883.7069783	687.1468255	1005.510294	0	991.9926313	0	0	0	0	0	525.5998829	0	627.3110836	1358.228836	0	512.2261039	0	688.4925342	0	0	831.2231973	1032.024483	687.8529531	1352.022223	525.7138251	491.0063	630.7180301	0	0	935.1674644	0	1278.209277	0	0	680.7746975
LPS(18:1)	488.728252	0	0	0	0	0	0	0	0	0	0	812.0746304	0	0	0	0	669.0566141	858.0743311	0	0	406.7729409	0	0	0	0	0	0	384.7960303	858.0743311	0	0	0	908.9340632	0	0	697.0806264	985.2509829	0	505.8167742	0	0	0	0	1044.927358	0	982.093394	0	568.8839508	0
LPS(18:2)	0	0	0	0	0	0	0	0	480.4538259	0	915.3527616	0	0	0	1193.507923	0	0	345.0422678	0	0	0	0	0	362.7626509	0	0	0	0	345.0422678	0	547.9054235	0	0	0	0	641.3788252	0	0	0	0	0	0	0	1282.088057	0	0	768.9460931	341.5402268	0
LPS(18:3)	0	0	0	0	0	0	0	0	0	0	0	0	0	0	0	0	0	0	0	0	0	0	0	0	0	0	0	0	0	0	0	0	0	0	0	0	0	0	0	0	0	0	0	0	0	0	0	0	0
LPS(20:0)	0	0	0	0	0	0	0	0	0	0	0	0	0	0	0	0	0	0	0	0	0	0	0	0	0	0	387.4773308	0	0	0	0	0	0	0	0	0	0	0	0	0	0	0	0	0	0	0	0	406.4765557	0
LPS(20:1)	0	0	0	0	0	0	0	0	0	0	0	0	0	0	0	0	0	0	0	0	0	0	0	0	0	0	0	0	0	0	0	0	0	0	0	0	0	0	0	0	0	0	0	0	0	0	0	0	0
LPS(20:2)	0	0	0	0	0	0	0	0	0	0	0	0	0	0	0	0	0	0	0	0	0	0	0	0	0	0	0	0	0	0	0	0	0	0	0	0	0	0	0	0	0	0	0	0	0	0	0	0	0
LPS(20:3)	0	0	0	0	0	0	0	0	0	0	0	0	0	0	0	0	0	406.6201362	0	0	0	0	0	0	0	0	0	0	406.6201362	0	0	0	0	0	0	0	0	0	0	0	0	0	0	0	0	0	0	0	0
LPS(20:4)	0	0	0	0	0	0	0	0	0	0	0	0	0	0	0	0	0	0	0	0	0	0	0	0	0	0	0	0	0	0	0	0	0	0	0	0	0	0	0	0	0	0	0	0	0	0	0	0	0
LPS(20:5)	305.6606421	0	0	0	0	0	0	0	0	0	0	0	0	0	0	0	307.6391323	0	0	0	0	0	0	0	0	0	0	0	0	0	0	0	0	0	0	0	0	0	0	0	0	0	0	0	0	0	0	0	0
LPS(22:4)	0	423.8004545	0	0	0	0	0	0	0	0	0	317.293209	0	0	0	0	0	0	0	0	0	0	0	0	0	0	0	0	0	0	0	0	0	0	0	0	0	0	0	0	0	0	0	0	0	0	0	0	315.8449346
LPS(22:5)	0	0	0	0	0	0	0	0	0	0	0	0	0	0	0	0	0	0	0	0	0	0	0	0	0	0	0	406.6399996	0	0	0	0	0	0	0	0	0	0	0	0	0	0	0	0	0	0	0	0	0
LPS(22:6)	0	0	0	0	0	0	0	0	0	0	0	0	0	0	0	0	0	0	0	0	0	0	0	0	0	0	0	0	0	0	0	0	0	0	0	0	0	0	0	0	0	0	0	0	0	0	0	305.0405724	0
PA(14:0/14:0)	0	0	0	0	0	0	0	1049.371016	0	0	0	0	0	0	0	0	0	0	0	1012.955995	0	0	0	0	0	0	0	0	0	0	0	0	0	0	0	0	0	0	0	1034.726234	0	0	0	1044.906285	0	0	0	0	0
PA(14:0/18:1)	0	0	0	1049.529878	1048.805054	0	1049.428993	0	0	0	0	0	0	0	0	1518.573589	0	0	1000.676802	996.0398637	0	0	0	0	1513.160038	0	0	0	0	0	0	0	0	0	0	1388.645208	0	1174.596308	0	0	0	2031.779583	0	0	1000.749828	0	0	0	0
PA(14:0/18:2)	0	356.6174146	0	947.0069292	0	0	0	0	954.9149642	0	0	0	0	707.3034014	0	0	0	0	0	174.5041187	0	0	0	0	0	0	0	0	0	341.1264619	0	0	0	0	1371.638556	0	0	0	0	0	0	0	0	477.8272193	1083.897504	0	0	0	0
PA(14:0/18:3)	0	477.7270385	0	997.0305896	0	0	222.2301729	443.3849034	0	0	0	0	539.3231056	0	0	0	0	0	0	0	0	0	0	412.5189989	333.7811598	0	0	0	0	0	0	0	0	0	811.1268555	245.9259527	225.1929041	333.6101781	0	391.0951663	0	519.6451838	577.3906759	0	769.9908593	291.5449389	340.4359675	0	0
PA(14:0/20:1)	0	0	256.6847035	0	0	0	0	383.2706657	0	0	0	0	367.9514529	0	0	1047.401736	0	0	0	1128.724831	0	0	0	0	0	0	0	0	0	878.5187626	0	0	0	0	490.6931123	230.3467078	333.1473505	0	0	0	0	0	0	0	512.2384126	0	630.26193	0	0
PA(14:0/20:2)	0	1052.751404	0	0	0	0	0	0	0	0	0	0	0	0	0	0	1083.394961	0	0	0	0	0	0	0	0	0	0	0	0	0	1034.26308	0	0	0	915.6609473	1051.554158	0	0	0	0	0	0	0	0	0	0	0	0	1046.328209
PA(14:0/20:3)	0	0	0	0	0	0	0	0	0	0	1580.825186	0	0	0	1049.522527	0	0	0	0	0	0	0	0	0	0	0	0	1566.454147	0	0	0	0	0	935.1082435	0	0	0	2070.348521	0	0	0	0	0	0	0	0	0	0	0
PA(14:0/20:4)	0	0	0	0	0	0	0	1447.633388	0	0	0	0	0	0	0	0	2444.020338	0	0	0	0	0	0	0	0	0	0	1048.268036	0	0	0	0	0	0	0	0	0	0	1036.189342	0	0	0	0	0	0	972.2731709	0	0	0
PA(14:0/20:5)	0	562.5928475	0	0	0	374.9746531	0	0	0	0	0	0	0	1462.088885	0	0	0	0	0	0	0	726.9446334	0	0	881.8220353	0	0	1118.823442	0	0	0	0	0	0	0	843.9442707	0	0	0	0	0	1568.200398	0	0	0	0	0	0	0
PA(14:0/22:4)	0	0	0	0	807.4888203	0	0	1053.241431	0	0	0	0	0	0	0	0	0	0	0	1401.911642	1430.650619	0	0	0	1051.592725	0	0	0	0	1051.958371	0	0	0	0	0	0	0	0	0	0	0	0	0	0	0	0	0	0	0
PA(14:0/22:5)	0	383.2852137	0	0	0	0	556.2021968	0	361.0500859	0	0	0	0	260.2442958	357.3976084	0	0	0	0	0	0	208.1206879	0	0	0	0	0	0	0	216.443496	0	0	0	0	0	0	0	869.386473	0	1128.894657	370.5353004	0	0	0	243.1804413	0	0	1083.188831	0
PA(14:0/22:6)	0	0	0	0	0	0	0	0	0	0	0	0	0	0	0	0	0	1027.483842	0	0	0	973.2847311	0	0	0	0	0	1567.64402	1027.483842	0	0	0	727.2440269	707.2226464	1037.251558	0	0	0	0	0	0	0	0	0	0	0	1189.629734	0	1094.251692
PA(16:0/14:0)	0	0	0	0	0	0	0	0	0	0	0	0	0	0	0	0	1568.866945	0	0	0	0	0	0	0	0	0	0	0	0	0	0	0	0	0	0	0	0	0	0	0	0	0	0	0	0	1447.927169	987.6543145	1611.665105	1600.988464
PA(16:0/16:0)	0	0	0	0	1530.091687	0	0	0	0	0	1559.504873	0	967.9882684	0	1009.27045	0	1750.76792	2095.884823	0	1052.380485	0	0	0	0	0	1730.484271	0	2801.493679	2095.884823	0	1746.138451	0	0	2510.257127	0	0	0	0	1542.896675	967.3255314	0	0	0	0	1598.111055	0	2056.910337	0	2102.131502
PA(16:0/16:1)	1830.576422	0	1001.282546	0	0	0	0	0	0	0	0	0	971.3219237	0	0	981.5800678	0	0	0	0	0	0	0	0	0	0	0	1044.760088	0	0	0	0	0	1491.083072	0	0	0	0	0	0	0	0	0	0	0	0	0	0	0
PA(16:0/18:0)	0	0	0	0	0	0	0	0	0	0	0	0	0	1447.981276	0	1029.427585	1480.555784	0	1056.691567	1041.033464	0	0	0	0	0	0	0	0	0	0	0	2505.2552	0	0	0	0	0	0	0	0	0	0	0	0	0	0	0	2629.045422	1365.7484
PA(16:0/18:1)	1979.354668	0	0	0	0	0	0	0	0	0	2327.065085	3998.51595	1433.88613	0	0	0	0	0	1771.829926	1473.880805	0	1459.911088	872.891401	2020.797209	854.5207965	0	863.6466158	0	0	1476.719282	0	0	5015.481713	0	0	854.8957736	655.5502061	1068.432302	6260.34664	0	0	0	1147.719962	0	0	0	5660.615481	1024.50223	3647.587097
PA(16:0/18:2)	1047.380748	1008.325432	0	0	1049.410987	1043.149333	1009.364025	0	1566.933423	0	0	1518.218878	0	1529.573887	1548.726845	1471.344919	980.3454447	2673.057706	0	0	0	0	0	0	1516.844903	0	1009.856178	1268.731092	2673.057706	0	0	1573.492116	0	1534.859451	0	0	1324.112263	0	1041.039275	0	1572.744417	0	1087.919329	1412.724357	1018.629848	0	0	1500.467947	0
PA(16:0/18:3)	0	0	0	0	0	0	0	0	0	0	0	0	0	0	0	0	0	0	0	0	0	0	0	1576.057132	1286.857371	0	0	1086.200955	0	0	0	0	0	0	0	0	0	0	0	0	0	0	1172.027547	0	0	0	988.5665436	0	0
PA(16:0/20:1)	0	1472.808089	374.9730475	0	0	421.5070175	0	0	0	0	0	0	0	0	0	0	0	0	0	0	0	0	0	0	0	0	0	1085.178133	0	0	0	0	0	0	0	0	0	1303.427995	0	0	0	0	0	0	0	0	0	0	0
PA(16:0/20:2)	1592.976202	0	0	0	0	0	0	1578.333505	0	0	0	0	0	0	0	1030.875036	0	0	0	0	0	975.602682	0	0	0	0	0	0	0	1050.045613	0	1030.313871	0	0	969.5387359	0	0	0	0	0	0	0	0	0	0	0	0	0	0
PA(16:0/20:3)	0	0	0	0	0	0	0	0	0	0	0	0	0	0	0	1047.260035	0	0	0	0	0	0	0	0	0	0	0	0	0	0	0	0	1004.438843	0	0	0	0	0	1042.952979	0	0	0	0	0	0	868.927421	0	0	0
PA(16:0/20:4)	0	0	829.3508473	1507.212323	0	0	707.1434413	0	0	0	755.3089028	0	1675.622151	936.3722568	868.8550547	1030.132308	0	0	0	1031.155524	0	0	0	0	1045.684344	1577.730238	0	0	0	1050.787894	0	0	0	0	0	0	868.1827439	1568.936376	0	0	0	0	0	1051.730457	0	0	0	0	3132.190413
PA(16:0/20:5)	0	0	0	0	0	0	0	0	0	1040.950374	0	0	0	0	0	0	1624.722234	0	0	0	0	0	0	0	0	0	0	0	0	0	0	0	1567.453187	0	0	0	0	0	1044.847949	0	0	0	0	0	0	0	1047.143561	1068.961012	0
PA(16:0/22:4)	0	0	0	0	0	0	0	0	0	0	0	0	0	0	0	1519.482699	1042.251913	0	0	0	0	0	0	0	949.4793683	0	0	1046.217561	0	0	0	0	1054.408396	0	0	0	0	0	0	0	0	0	0	0	0	0	0	1094.331172	0
PA(16:0/22:5)	0	0	0	0	0	0	0	0	0	0	0	0	0	0	1003.948918	0	0	0	0	1518.674655	0	0	0	0	0	0	0	0	0	1055.812852	0	0	0	0	0	0	1566.364135	0	0	0	0	0	0	0	1053.52509	0	0	0	0
PA(16:0/22:6)	0	2035.94492	0	0	0	0	2596.48272	0	1037.45828	0	0	0	0	1037.488165	0	0	0	0	0	0	0	0	0	0	0	0	1041.759713	1065.431957	0	0	1048.137447	0	0	0	0	0	0	0	1563.080206	0	1040.438401	0	0	0	0	1037.58566	0	0	0
PA(18:0/14:0)	444.3706304	0	748.1126784	0	0	0	0	0	1175.072346	0	0	0	0	0	0	0	695.4787726	0	0	0	0	0	0	0	1051.559706	0	0	0	0	0	0	0	0	0	0	0	0	1020.21817	0	0	0	0	0	1053.443701	0	0	0	0	0
PA(18:0/16:1)	1647.833063	6097.758224	2252.882008	2579.414544	2271.115328	1538.749378	2565.945257	5124.971508	2040.599962	0	3569.510277	1788.54717	3591.848456	2529.384512	1001.183844	2668.277558	5231.6444	1024.597458	0	2490.571356	0	0	7019.554242	2004.789309	2017.520549	8596.615602	1517.574274	1579.862057	1024.597458	2480.293437	3483.780943	1540.923358	2578.627714	3059.807143	1893.335526	5269.869813	2561.526312	4847.946885	4784.758903	8193.669733	3016.022682	4112.189176	6547.637043	1520.261746	4552.396101	3949.393576	1840.557215	4695.295566	1047.334268
PA(18:0/18:0)	2651.703913	7065.855457	3980.517132	1436.57869	4110.002427	0	3856.572973	2317.135604	1659.175821	0	2502.818233	4152.298598	4631.850379	1542.571274	2522.658271	0	1545.723139	1046.290508	3990.844441	3487.800719	0	1994.369684	5035.314914	1400.361252	3043.676291	2022.702123	1020.049281	2090.8404	1046.290508	1484.110015	3824.108138	2055.7673	3295.835432	3605.005843	4508.043109	1511.08743	2123.867038	4627.979182	3811.246828	1513.637304	4072.619237	1543.940778	2025.178034	3806.658067	2020.903138	4640.456416	0	3125.092865	1007.987274
PA(18:0/18:1)	119427.9594	226153.8166	76395.04532	95714.63179	126708.0488	67053.87824	126281.1113	101780.1146	76036.55412	16904.90074	78713.17716	88484.60285	188027.125	75360.06688	64582.29607	55295.01809	113609.6296	51840.77599	82861.88725	49404.47909	35819.23903	38642.04421	154173.1368	75723.63748	127272.6495	194332.2349	32134.02305	75748.97169	51840.77599	52109.39012	88938.47658	48843.63835	101499.3156	104376.2575	163997.6473	100705.6923	132333.168	247245.3365	177230.4623	87675.91015	118678.1172	70509.49798	85787.53294	109022.6944	66872.65157	159875.543	85025.5219	122057.6159	162252.9846
PA(18:0/18:2)	142168.9126	338615.58	86575.13798	161816.9181	177835.2738	90520.28778	204336.2507	60764.91405	126324.1726	60426.70363	39685.49285	171602.0025	138075.8417	102352.2499	215057.443	97800.23104	73220.83883	233473.317	255448.8974	57715.12114	101901.1068	105287.5433	106545.9585	113619.3952	306471.2868	248615.5618	77522.72736	79126.40969	233473.317	101473.5291	162645.3982	162764.2432	167042.6052	140689.0223	375177.471	147452.8616	191715.2316	488962.2585	454834.9815	168603.2187	354000.7106	34543.53282	198995.824	309374.3513	102400.9343	446328.9174	146153.6806	252702.7276	474200.0008
PA(18:0/18:3)	1467.894293	3063.759732	1543.77019	1013.917374	0	0	4120.337736	1520.38965	0	0	0	2525.446627	1491.503858	1543.116926	4114.745051	1030.132308	3137.759762	3140.279713	5490.476721	1495.096067	1565.848753	996.9230904	1513.899498	3851.702174	0	5063.625248	1027.983877	4195.580522	3140.279713	994.9642926	0	1838.561609	4299.078547	2212.927346	6577.863716	2526.526477	3603.34706	5873.997785	5046.916541	2538.855375	1012.20718	0	1008.948964	2632.793372	1008.763642	7353.080184	0	5793.363179	2796.947084
PA(18:0/20:0)	2611.925672	10746.25762	1540.181905	2568.271881	2416.975515	5176.006675	2669.568713	2529.255131	1928.88412	0	3049.560561	1604.024451	1522.717324	2585.255396	932.0338235	2951.890255	3656.933722	5006.070986	2067.373696	2551.923729	0	2034.819235	1011.090855	1000.08821	2400.923557	4435.13314	2064.0203	4314.937195	5006.070986	1362.880883	2011.302976	1408.353174	0	2581.312698	3046.879703	7425.180941	3102.913513	3881.502909	0	3027.464675	0	0	0	2360.235592	1529.21461	2878.51377	2068.65942	3946.927688	8055.016443
PA(18:0/20:1)	4735.288494	9421.323741	2576.913725	3535.055501	7078.685646	5167.957683	1033.000806	6671.806621	0	0	1526.987639	2053.546805	7226.106208	3055.240231	0	1791.074214	2614.280266	1567.769865	4529.052607	1006.028382	1006.223032	1013.449962	7663.338523	5580.783599	5654.065206	4627.665315	2589.41651	2520.861733	1567.769865	1001.797066	2410.758124	0	6115.563421	1768.201354	5082.701387	0	4124.230158	4386.367337	5105.658177	924.1575404	2548.100549	2575.590228	6736.318943	2309.767051	1523.132579	8248.342771	4141.926308	3136.392727	5750.941552
PA(18:0/20:2)	2661.913698	9760.263187	2585.014462	2017.955206	6724.074199	1029.993618	6048.813393	1563.227327	0	2570.315302	0	3071.905123	0	4130.255953	1439.092315	2543.560683	3136.046026	4698.248944	11050.83291	0	3552.82743	1684.668723	2537.150035	0	5122.212532	3558.896798	0	1593.471214	4698.248944	1997.981242	2424.271991	1549.453721	6111.115249	1934.112895	1476.75217	1976.333285	2552.621742	6580.445713	14789.40599	3983.517005	7208.464143	0	1436.655661	1321.031184	2033.486382	5492.931798	4652.495575	1444.010697	4312.218783
PA(18:0/20:3)	53866.23042	142254.2838	34202.92626	53641.56739	56918.72422	34710.7101	67834.84304	40364.97589	34963.02674	12442.79037	26144.93722	46822.22029	98921.27345	51757.37303	52325.07117	25253.1798	55041.06474	39707.31977	54354.12107	21161.58744	33722.97488	21987.46988	57569.1587	29942.8521	98561.57739	70835.19611	12847.58852	27662.82307	39707.31977	31377.38699	64264.94894	31568.25788	89810.16787	57503.40315	92583.41953	35128.07708	73465.22424	129656.5746	137138.5927	68653.27642	83808.93797	11951.65044	50310.99482	48940.39527	38136.8043	95788.60786	40780.93036	118619.6255	81950.0335
PA(18:0/20:4)	839429.7973	1621038.135	381206.2336	531038.8116	778014.5708	343924.4246	784621.2018	678875.882	469777.2702	126750.8472	460143.1008	642130.8063	1453060.361	600744.9273	498063.4113	249292.0391	788038.0967	366840.4729	673186.2615	321127.6731	331517.4688	297317.1287	883664.761	474194.726	761246.7618	1063105.655	144185.4044	466321.226	366840.4729	376056.2458	620062.9997	258681.9966	728155.4345	607696.3952	915418.7654	412743.3613	740071.6524	1458900.082	1194936.803	861050.5763	593667.3306	440073.9407	525774.7513	636092.4809	479528.6838	1007453.411	281409.5273	810759.5842	757005.1542
PA(18:0/20:5)	11454.81138	28643.9934	1554.119929	8810.291455	4098.80204	4672.641964	34253.4624	6232.882957	13483.59084	1562.058723	10869.03449	9321.232946	6750.452062	19427.2041	5184.832277	5163.434819	4162.743425	22921.77857	17964.63035	2047.863034	4871.037064	0	6200.079538	2582.295975	9760.794258	9362.260727	2083.172794	5213.85252	22921.77857	4106.578701	9712.822	8810.905135	21875.21288	11941.82896	11889.21341	6708.499908	10379.67631	21689.87603	36439.93576	26451.42339	23431.5943	0	18227.07266	5732.172873	12409.47503	5046.493874	9345.254958	22721.22959	6251.146579
PA(18:0/22:4)	196274.7157	406356.4478	142324.6717	227061.5751	297131.9291	75811.90458	85846.1655	297480.7959	90786.69792	19080.02711	215436.2319	153231.7574	488231.9836	104338.6358	137121.7759	62515.29976	320954.1286	37039.87247	107457.1391	84333.18655	63841.64496	52137.07679	345391.3218	132287.3412	111024.5977	327768.5993	15434.04748	65627.72922	37039.87247	103534.3531	122920.0793	55572.83364	171359.749	238234.0372	290348.5859	117102.9843	220913.8991	304803.9589	271333.957	98852.13398	117742.5869	238934.5818	58628.19073	148432.6331	91577.78382	292666.0231	72803.21685	124036.2412	221693.2129
PA(18:0/22:5)	125785.2855	221752.236	39981.96884	93249.19658	123218.3995	51726.48415	110492.8784	90333.73705	68807.60342	19255.60637	65603.85211	74507.59111	209934.7232	93048.77585	119409.312	44741.64849	120086.8599	79814.47175	87822.69094	29861.4126	48421.94104	35436.61971	144294.396	74850.52047	82370.85188	188456.9581	32288.60696	62636.47336	79814.47175	68102.70676	72797.26716	51815.10998	122144.7532	75462.48091	181389.2585	73739.42623	100810.6008	179403.8105	186766.5766	142277.579	108707.3407	53226.55595	74492.01202	102073.8395	61768.39571	185923.2596	66560.64509	150391.9135	159155.0633
PA(18:0/22:6)	75513.10785	117990.194	50911.48993	40494.29215	64993.72045	49935.58042	111569.2206	46692.54334	52879.76529	10949.98325	47244.63137	67731.71245	76759.57109	72859.46693	44720.91821	40540.64674	48752.11326	62701.59809	81335.94702	39454.24152	25947.58924	19755.17128	45705.9918	54862.43632	61064.56387	78663.06919	23462.40668	65480.94941	62701.59809	28367.99406	56961.44803	20791.81806	68907.0487	57545.57462	68294.81118	41701.84865	60850.14697	100396.3853	69133.45387	81758.55212	77174.33153	28602.06878	38199.35087	68971.93987	54371.78325	36321.84745	51428.85842	80468.2124	47572.95179
PA(18:1/16:1)	1676.027553	0	0	0	2080.522359	0	1026.685963	0	0	1922.44097	1032.159009	0	1543.142283	0	0	0	0	0	0	0	0	0	0	0	0	0	0	0	0	0	0	0	0	0	0	0	1030.132308	1099.086776	1115.269809	0	0	1048.218856	0	0	0	0	0	1128.755076	0
PA(18:1/18:1)	2539.357673	1568.081245	1030.248872	988.4767389	1468.113585	0	1565.300589	0	2054.502121	0	1038.616597	2021.828562	0	3594.85079	999.3678351	0	3114.212247	0	1850.667207	0	1026.544164	0	1556.474923	2732.331093	1121.161441	1513.910618	0	0	0	0	657.1755087	1544.544996	2028.142243	1006.295803	1745.100746	0	3585.988215	4887.495111	0	0	1690.851946	0	1020.152768	3905.611421	1515.268062	0	1523.936769	0	1462.867596
PA(18:1/18:2)	1585.222819	3145.854006	1026.687441	1512.503617	0	1542.643507	1308.047867	1006.97763	2571.09752	0	0	0	3048.1779	5142.600382	2520.384979	958.7072516	0	1635.394331	2457.320792	1997.753134	0	1015.177375	0	0	0	2527.594167	0	2623.059003	1635.394331	0	2498.27852	1068.689215	3533.255087	0	3518.107303	0	3081.746661	7077.999276	7089.327762	3083.372049	2540.363605	0	2534.462595	912.6355088	3530.317116	2921.601687	0	1567.410385	3157.293468
PA(18:1/18:3)	0	0	0	0	0	0	0	0	0	0	0	0	382.2106276	0	0	0	0	0	0	0	0	0	0	0	0	0	0	1045.228302	0	0	0	0	0	0	1005.919391	0	0	0	1519.620957	0	0	0	0	0	0	0	439.9590259	0	0
PA(18:1/20:1)	0	0	0	0	0	0	0	0	0	0	1498.763306	0	0	0	0	1039.875425	0	0	0	0	0	0	0	0	0	0	0	0	0	0	0	0	1520.069195	0	0	0	0	0	0	0	0	0	0	0	0	0	0	0	0
PA(18:1/20:2)	0	0	0	0	0	0	0	0	0	0	0	0	0	0	0	0	0	0	0	0	0	0	0	0	0	0	0	0	0	0	0	1049.248174	0	0	1042.790782	0	0	0	0	0	0	1036.294848	1049.993722	0	0	1049.428993	0	0	0
PA(18:1/20:3)	0	0	0	0	0	0	1037.259431	0	1573.459548	0	0	1036.352653	0	0	0	0	1081.165825	1047.567451	0	1537.198422	0	0	0	0	1022.694453	0	0	0	1047.567451	1056.318723	1038.992988	1552.402507	0	0	0	0	0	3419.760472	1540.31267	1028.673871	2069.5681	0	0	0	0	0	0	0	1084.269158
PA(18:1/20:4)	9671.38631	8816.665334	1552.374625	4154.092319	2074.467465	2076.588789	3108.737208	3117.297671	5696.604496	1561.000068	3627.867232	6760.507314	3819.103615	4276.948538	0	2586.087539	2611.051155	2087.26909	7193.743343	0	2072.606582	0	1542.005269	0	5213.183523	2083.940973	3124.953506	0	2087.26909	1534.576717	7702.525212	0	3119.204029	2581.624379	6346.427048	0	2074.436954	11917.89637	8376.808669	17645.44428	6256.921768	0	2077.915336	0	4647.92998	3106.375916	3110.524413	5744.306443	6253.395409
PA(18:1/20:5)	0	0	0	0	0	0	1559.031474	0	0	0	0	0	0	0	0	0	0	0	1057.946092	0	1033.617545	0	992.0100818	0	0	0	1512.105455	1083.955477	0	0	0	0	0	0	0	0	0	1559.272312	0	1047.535949	0	0	0	1010.337513	0	0	0	0	1064.61877
PA(18:1/22:4)	3131.752425	2067.05128	0	2038.404226	0	0	0	0	0	0	0	1564.179911	1556.43662	0	0	0	1070.672737	0	1548.806009	0	0	0	1039.437164	0	1019.67331	1030.215247	0	1030.919486	0	2063.615831	0	0	0	0	0	951.8995695	1559.340174	0	0	1450.377707	1559.047807	0	948.7189997	0	1557.604747	1023.980603	0	0	1043.260842
PA(18:1/22:5)	1051.454702	0	0	0	0	0	0	1036.564919	4153.859122	0	0	0	0	1038.368449	0	0	0	0	0	0	0	0	0	0	0	0	0	1294.32141	0	1502.457211	0	1038.314246	1037.76959	0	0	0	1516.358967	1013.982162	1556.702857	934.4216314	2598.647901	0	0	0	0	2587.904485	1037.46904	0	0
PA(18:1/22:6)	1525.16685	0	1041.018031	0	0	0	1038.886861	943.4320889	3634.740642	0	0	0	0	0	0	987.5766199	0	0	0	0	0	0	0	0	1042.875315	3127.505478	0	0	0	0	0	0	1042.970986	0	0	0	0	1547.615204	0	0	0	0	1564.020956	1043.404545	0	0	2592.894865	1023.965746	1048.062664
PA(18:2/16:1)	0	0	0	0	0	259.125123	0	0	390.2900317	0	0	662.1507538	0	0	868.8660218	0	1601.447026	0	0	417.9791064	0	0	668.1517684	1051.471473	0	0	0	0	0	0	0	612.2765394	0	784.0716369	0	454.4788383	361.1697605	0	0	0	0	0	0	0	0	0	0	0	0
PA(18:2/18:2)	1093.236893	1536.58788	0	0	0	0	1036.604295	0	0	0	0	0	0	0	0	0	0	0	0	0	1041.630501	0	0	0	0	0	0	0	0	0	0	1048.806577	1513.516058	0	0	1014.048396	2049.456138	0	0	0	1513.305803	0	0	0	0	3088.793118	0	1136.889008	1001.823756
PA(18:2/18:3)	0	0	0	0	0	0	0	0	0	0	0	0	1464.34168	0	0	0	1085.236548	0	0	0	0	0	0	0	1037.336223	0	0	0	0	0	0	0	0	1558.858931	0	0	0	0	0	0	1046.966442	0	1053.913409	0	0	0	0	0	0
PA(18:2/20:1)	0	0	0	0	0	965.2975426	0	0	0	0	0	0	0	0	0	0	0	0	0	0	0	0	0	0	0	0	0	0	0	0	0	0	1252.788414	1003.397111	0	0	956.3939749	0	0	0	0	0	0	0	1236.221686	0	0	2615.838796	0
PA(18:2/20:2)	0	0	0	0	0	0	0	0	0	0	0	1198.20054	0	0	0	0	0	0	1531.134422	0	0	0	1013.191328	0	0	0	0	0	0	0	0	0	0	0	0	0	0	0	0	1500.832476	0	0	0	0	0	0	0	1624.722234	1584.715272
PA(18:2/20:3)	0	1064.701174	0	0	0	0	0	1020.083415	0	0	0	0	0	0	0	0	0	1018.645793	1027.756551	0	0	0	0	0	0	0	0	0	1018.645793	0	0	0	1019.019139	0	0	0	0	0	0	0	0	0	0	0	0	0	0	1549.822921	0
PA(18:2/20:4)	4704.068056	0	0	0	0	1374.320958	0	0	0	0	1039.883409	0	1550.353561	1030.124695	0	0	0	519.8085156	1023.551043	0	0	1030.090801	1511.293999	0	0	1561.417266	0	0	519.8085156	0	766.2761224	0	2078.619014	2591.172679	940.4159094	0	0	1558.628084	1021.091598	0	0	1036.294848	0	0	0	1034.839798	0	1041.445066	1044.625298
PA(18:2/20:5)	287.359233	0	0	0	0	1047.13043	0	0	0	0	0	0	0	1042.334458	0	549.3467724	0	397.9510064	0	1004.257932	0	0	0	0	0	0	0	0	397.9510064	0	0	0	0	0	0	1053.340134	935.7051355	0	0	1048.470766	0	0	0	0	0	0	0	0	1392.705738
PA(18:2/22:4)	0	0	0	0	0	0	0	0	0	0	0	0	0	0	0	0	2087.864444	0	0	0	0	0	1589.19429	0	0	0	0	1042.140173	0	0	0	0	0	0	0	0	1030.284053	0	0	0	0	0	0	0	0	0	0	1565.375655	0
PA(18:2/22:5)	0	0	0	0	0	0	0	0	0	0	0	0	0	0	0	1030.011535	0	0	1014.748398	1025.311407	0	0	0	0	0	0	0	0	0	0	0	0	0	0	0	0	0	0	0	0	1015.558068	0	1002.229845	0	1083.440082	0	1525.395008	1565.262366	1004.357859
PA(18:2/22:6)	0	0	0	0	1438.836272	0	0	0	0	0	0	0	0	2015.03998	1039.255616	0	0	1057.399501	0	1041.033464	0	0	0	0	0	0	0	0	1057.399501	1010.396983	0	0	0	0	1027.529035	0	0	0	1043.683456	979.2803987	0	0	0	0	0	0	0	0	0
PA(20:0/16:1)	3140.255259	14705.24623	4082.753746	8572.209238	8069.055395	1546.944031	4694.832022	16942.83633	2495.392902	1531.884599	11659.17474	5554.11849	12517.52024	4642.420884	3090.233141	1918.306329	15165.27846	2091.398921	2936.577182	2806.491014	3519.550617	2519.366339	7371.146526	6743.747424	16858.55497	13086.70204	0	1046.165264	2091.398921	3493.518919	2510.18038	2026.710592	11162.89343	8768.430287	8793.799603	4371.33802	7146.083757	16007.98196	9794.448962	7356.340748	7332.471956	12708.29393	3595.671987	8105.571402	0	12361.57497	2579.087184	11069.90958	3605.974333
PA(20:0/18:1)	88520.86969	180452.6737	74818.50632	144347.8989	87970.29499	59676.57333	121116.6882	67564.19655	75063.31253	10825.89799	61059.95793	82401.83624	128846.6817	60234.47752	94303.10231	31991.33734	79854.44782	58458.50522	136689.4854	35780.74902	30946.73517	42973.09176	106106.428	59624.70885	117593.2415	171390.6325	20921.90981	37979.74946	58458.50522	49565.42432	75592.41276	44950.79824	86827.85115	113790.1729	152704.9165	60428.52156	123510.4102	163135.4226	173580.2444	124951.3334	109488.0521	56731.68018	74171.71396	134150.0226	42077.26178	146138.2647	47241.56693	123293.1095	154083.657
PA(20:0/18:2)	254175.2386	515576.4815	156843.7035	392498.7782	263234.0453	162597.0817	410970.2323	118257.6284	224585.0954	69918.04396	72234.42164	343313.789	248039.3242	184449.2987	277295.3184	206186.9683	122070.7311	317940.7189	338545.5113	96137.74025	149128.3938	170498.1977	196554.6182	157906.1887	452152.7394	430880.6519	124195.5658	139602.0706	317940.7189	191120.7465	209900.1034	199772.3921	211507.3751	426070.0824	514191.6063	237289.9861	310862.0279	848956.5026	603978.9805	411182.5725	467645.8468	63368.38252	226732.6975	546607.375	107043.5431	627892.0258	200905.9384	429616.1597	721650.4259
PA(20:0/18:3)	2193.824468	7229.140975	0	6290.091712	2663.776135	1032.351479	4501.569365	3601.98251	1547.679007	1039.251404	0	5445.563902	3424.061311	2064.705684	4486.300354	0	1564.860234	4115.835625	7876.57223	3836.768466	1030.128146	0	2792.008365	3916.793631	2066.605065	9997.778961	2033.515261	7745.466853	4115.835625	2453.648703	2045.885648	4638.600514	3963.556767	7161.314253	8152.573192	4047.982197	4443.145807	6752.802892	4100.560067	6848.099821	6486.74437	1223.014899	2515.720277	8640.302802	2430.622577	7989.010384	1556.656088	7834.734931	10432.65592
PA(20:0/20:1)	942.9484244	10271.10208	1554.878665	3565.81158	3629.656025	4649.547999	2208.091949	0	1036.915789	0	0	2603.103801	3754.695905	0	1510.691002	0	2082.84725	2082.505094	2030.885499	0	0	1539.235313	1517.860309	0	3771.966786	4633.829955	938.4352827	1604.464006	2082.505094	1016.414959	1035.480949	0	4684.596291	1926.453324	3089.624927	2451.243127	5161.79655	2899.308235	0	2073.20324	2081.566452	0	0	0	1030.845495	1524.528038	1018.254156	1443.335803	2238.778766
PA(20:0/20:2)	3116.140937	2833.513685	0	3713.210156	3695.20532	2596.596677	1906.130596	1563.02088	2070.19298	0	2192.055882	4290.277934	1211.082237	0	5168.999858	0	4438.884196	4004.945321	2346.794517	1534.179849	3061.807889	0	4497.763781	1008.821583	1968.987321	6783.322966	2082.88927	1694.814058	4004.945321	2561.456949	2218.76808	1556.674116	4512.266983	2471.269819	2327.514001	2960.822094	1906.262858	9402.041724	3873.667886	4678.267684	6222.860494	1552.336826	0	1539.927218	0	1770.597408	5195.568525	5921.171165	7835.892781
PA(20:0/20:3)	98610.1686	193777.6727	34157.50126	77496.57493	75760.36774	56657.02043	93398.1131	70328.52303	64243.23256	11588.58998	57735.48741	83361.33191	112186.4682	84919.64256	60553.86789	33975.52086	80345.06188	66684.02437	84974.64252	31514.62561	40433.39966	39849.65152	92662.07829	45667.82808	129403.1256	104164.4962	15077.44876	58767.78012	66684.02437	50419.19991	78094.07885	32204.44148	97474.38479	101387.687	109086.6078	52632.19843	109671.9134	192272.6931	167928.6612	164778.3919	107994.1833	31298.43788	52523.29714	100885.6279	44224.70052	148646.4338	49096.26879	130746.9255	116599.2103
PA(20:0/20:4)	1304835.996	2795821.544	817687.4954	1126315.078	1048526.055	520096.429	1235071.231	1129287.815	920077.7372	161911.406	824103.5663	1068064.796	2170243.475	1037930.929	810334.2582	360825.7288	1129489.976	499311.9982	1048379.114	487397.7169	449531.3082	499784.8031	1485590.695	962349.4863	1228103.295	1968093.105	234662.8495	802776.5005	499311.9982	706915.6657	1233499.986	335454.2944	968629.0291	1411485.867	1382224.252	611969.9398	1294975.187	2145784.915	1719554.155	1952276.537	1002312.877	709928.3693	516575.9674	1228081.277	508908.0205	1646555.406	368522.9506	1219906.481	1210212.331
PA(20:0/20:5)	37057.99754	69776.73062	5958.174983	37499.85417	11961.5617	8803.507897	78532.21083	19050.28131	28549.03558	3628.777416	16669.18404	27109.03397	21607.25217	48922.34646	10896.98641	20309.72522	9967.086892	35507.3687	39907.88889	8057.540617	13011.30791	3763.707627	17062.32914	8813.738648	11654.6455	37444.95327	10151.76509	15809.58159	35507.3687	14016.39244	15011.36206	12727.88271	33683.92617	52763.71929	31145.21945	6664.628524	18527.69759	57327.49541	43951.61094	88325.4943	55227.94538	6963.985802	25240.03189	23953.59128	16674.05326	24409.3306	25529.67527	38535.5445	34394.49985
PA(20:0/22:4)	223508.2474	447420.5253	158095.5125	193355.0946	224662.3671	81292.55061	61392.48185	303073.1851	70299.12952	14826.88499	173076.2415	146499.0844	517897.063	55206.31449	127157.9638	30504.60674	248782.9161	25302.64102	100216.3951	88473.10902	58861.12565	36926.02279	365719.0585	165071.4738	128305.7628	345233.4286	26626.82765	78963.9047	25302.64102	109128.8087	148012.9676	28991.91325	120620.1793	278413.6605	274579.3345	92466.42152	259324.0185	262784.4105	158932.9684	61574.05407	80380.04478	183378.8996	48835.19343	212554.6804	63252.5441	310878.9473	44737.10206	84400.11753	144425.6419
PA(20:0/22:5)	146372.5551	213654.8455	38042.6145	106287.1156	106717.0382	35004.39797	102988.6644	50488.59454	62188.12022	16178.19449	60413.42658	90859.91511	233716.9732	60009.91499	81837.53924	19630.77775	114220.7959	57845.46263	85380.9675	40812.03339	32248.52807	31523.48224	141414.4137	72366.30328	70644.31277	209039.4355	18252.83084	48408.4612	57845.46263	63637.31832	94407.14049	23946.3423	107296.6798	85419.81254	148352.4711	51508.4462	124485.3671	177342.2859	96686.41218	122072.0831	77594.19431	41364.68446	36651.91778	133683.0684	45671.40319	129794.377	29816.2695	84815.85503	106762.4815
PA(20:0/22:6)	83979.82748	185789.1343	49740.85158	54362.78464	60037.72466	50716.24918	171601.019	64330.47952	67250.36839	8565.230188	50936.95633	72994.82556	109148.1278	86109.5844	36365.56664	44252.60425	62396.35526	70131.07451	98121.63042	29303.53934	42168.88868	14557.16158	61686.84262	63912.82676	67282.98242	134503.8578	28128.83509	79757.96695	70131.07451	41462.55499	84087.66049	15645.37055	63251.92934	89964.49	63752.71849	33383.72815	90514.01721	151714.0839	85079.30866	122701.6243	98423.72338	28198.71299	33566.66375	116132.9459	59283.70989	66425.34933	33320.6344	62838.81185	60393.48686
PG(14:0/14:0)	0	0	851.5443888	0	0	0	0	0	0	0	0	0	423.353375	329.4879414	0	0	0	552.8947269	394.4195961	269.3610023	0	0	0	0	0	0	0	328.5036372	552.8947269	0	0	0	0	338.1289222	0	0	0	0	669.3114882	0	0	0	0	349.8747975	0	0	0	305.3592742	545.43157
PG(14:0/18:1)	2279.8728	550.7651047	797.6064751	898.6936134	879.4386283	749.9289724	1064.37815	1100.056681	1258.358038	0	836.6914918	881.813023	1062.35313	1820.67703	0	0	837.2307349	2813.299786	675.6002525	0	834.0242868	404.4220437	282.2100205	1376.506229	1387.492801	274.7480498	0	1420.955536	2813.299786	548.9358981	1899.051129	754.3945435	415.6575989	798.458208	971.5406859	1224.616762	1610.098224	1245.227637	604.8763719	1777.192163	517.137195	526.3963664	0	1114.873367	561.8276932	2116.163691	800.9093304	1272.279126	648.1669763
PG(14:0/18:2)	1604.734198	847.388164	0	1102.961544	514.3230879	0	368.9072175	697.2798186	902.6355866	391.5143136	553.625	675.0344466	1044.752084	633.1578564	479.6221726	786.5369009	1199.020055	1514.022076	1527.835067	390.1085534	660.2420141	771.8539959	984.3996417	544.8721773	1577.944363	2090.482788	691.801323	1274.574594	1514.022076	0	899.3274641	0	405.5635847	776.4053329	1643.505332	956.5151297	2314.9266	2219.681242	668.3921398	1697.01712	696.8845715	0	544.8307893	537.4307287	273.9240249	2583.261939	0	1241.383361	1545.015597
PG(14:0/18:3)	0	0	0	0	0	0	0	529.0196435	510.82549	544.1701383	0	0	0	0	0	0	0	494.6218608	269.3835064	422.5658554	406.1098591	0	274.3095111	517.7412016	0	0	403.1135191	0	494.6218608	344.6918084	0	0	0	0	0	0	360.4686604	0	0	599.9975984	0	0	404.5689755	0	0	765.3915827	0	0	674.5391111
PG(14:0/20:1)	0	0	0	0	0	368.0362357	0	0	0	0	0	0	370.2862976	0	0	0	0	806.1200693	0	583.3098547	0	278.0920213	320.3562415	0	0	0	0	0	806.1200693	0	0	0	0	0	0	0	0	0	0	0	0	0	0	616.5807833	0	0	0	0	0
PG(14:0/20:2)	0	831.2806164	0	260.6099826	910.812292	0	0	273.194148	0	0	0	0	0	0	0	0	397.7366233	0	0	415.5164037	0	0	0	267.6654324	0	0	0	0	0	0	0	519.2479632	0	0	255.3238466	0	369.1358286	0	415.8089412	0	0	0	0	0	409.4149999	0	0	625.9542782	0
PG(14:0/20:3)	0	418.3227282	0	260.0878302	534.5965873	0	535.4727559	421.3785756	0	0	0	278.9019758	383.7062588	0	0	381.0405078	0	1301.457677	382.5221615	0	0	0	408.2031544	544.3049863	419.2209745	421.6656787	0	0	1301.457677	0	0	0	396.8002734	0	829.0153602	283.8362339	501.5120258	424.2239873	560.9155435	0	415.9408667	0	0	424.2045046	568.0115987	0	639.6716515	0	535.3783941
PG(14:0/20:4)	1630.422225	4013.661457	1012.936769	1390.506862	622.0505386	758.5407871	2250.092507	1107.0559	1220.182132	280.0689819	833.6400556	1973.967883	2763.999239	1746.117216	1525.873065	0	1960.266696	684.5820611	1738.579025	0	263.700375	1087.256487	767.3218735	1673.333492	1372.810912	1264.735384	421.8836473	465.2646486	684.5820611	1642.318083	2797.76549	629.2398955	1262.252608	1546.894496	3114.973619	418.7307183	1514.989581	2124.091329	1878.838933	2643.983326	0	1013.766725	1259.128269	1671.429282	1246.224258	2486.739505	1011.90302	1896.843029	0
PG(14:0/20:5)	0	0	502.017592	0	0	0	401.1229382	403.1793074	0	0	0	536.1331569	639.7557387	669.9999146	0	534.0210768	0	0	420.5077514	262.1819431	0	283.3235405	0	0	0	0	0	0	0	270.7223324	421.8462675	0	0	0	0	0	0	0	0	401.3473815	380.614335	0	0	669.3674922	0	0	0	0	0
PG(14:0/22:4)	789.6051338	750.710143	495.0787461	0	0	0	495.671429	499.181806	0	0	676.5017266	0	1476.215812	499.0159695	0	0	648.2566722	500.4756723	407.7951778	280.6154343	0	0	699.5351905	839.8592016	0	637.9729709	0	0	500.4756723	822.6085931	518.2012049	748.0182055	0	623.4500055	504.0264956	0	377.8885592	869.5038289	1146.87761	498.378581	0	1248.013625	0	748.6705856	0	872.8711934	0	1699.312682	1353.877232
PG(14:0/22:5)	0	627.4817043	1013.132713	0	0	0	687.1690454	0	0	0	0	642.5802728	882.1128973	592.7001397	1064.146637	0	0	0	948.7430921	0	559.9156775	0	555.6643034	0	864.3467753	879.1600752	0	0	0	684.0770164	977.8181529	0	733.5263278	418.5606785	1304.96893	499.0172839	586.855589	893.2530897	655.8436566	832.3566919	0	0	0	0	0	831.3286174	0	0	0
PG(14:0/22:6)	746.5166223	418.334344	0	972.2856073	403.0791844	0	938.6667008	279.2075063	795.0747581	0	419.4103938	0	402.9107408	674.4684624	402.5175754	666.8222959	822.7341091	552.7298837	268.2117056	310.5913145	558.1274086	530.2996194	0	415.6080434	0	699.7155018	415.758599	0	552.7298837	562.6883219	1756.515439	0	552.5140082	669.2205009	552.6100344	692.1872368	401.1508785	977.1909169	391.0046279	1073.939276	415.2982932	0	0	0	424.1340661	672.0063793	0	1045.034324	902.3646518
PG(16:0/14:0)	1335.225114	1353.05661	643.3206115	820.2161923	384.899793	515.4438577	1021.21347	3142.081303	10070.33674	0	1226.631284	0	1930.561664	776.3740678	0	487.0394952	746.5191599	5790.071539	655.700175	0	1574.703827	509.8665599	685.6418618	0	962.3338664	1103.989766	0	1533.675251	5790.071539	388.1345515	1958.251741	0	946.9380368	0	963.6005207	5762.089193	593.2900319	2191.528844	2394.736207	2955.59248	1093.05996	1154.210954	0	689.6681073	271.6707229	2817.164987	0	3840.403332	0
PG(16:0/16:0)	14886.57935	15912.99106	16566.95158	6255.331224	14084.74774	12589.96418	8184.253689	22749.94655	47647.18412	1121.635552	4231.81678	6035.032025	16501.41987	10214.17638	6382.452265	3229.282079	10233.04303	19143.65916	4649.533621	10763.02121	10182.47216	2101.386133	19478.48665	6513.648956	9335.960301	12179.42641	1461.244734	6340.298386	19143.65916	6973.023626	9253.201057	4098.945583	17131.98217	9893.104419	5630.259544	25388.99031	8906.335642	11862.91902	4723.492149	11356.87531	3284.053686	4998.717309	3645.549755	5993.541485	10878.42233	19220.54107	3876.262727	14579.41438	7341.67901
PG(16:0/16:1)	3815.672606	6243.491851	5443.773881	1534.479246	2393.331281	2394.492154	2392.322041	14221.23439	31579.77672	276.8420589	4898.43933	1397.901286	2129.612399	3581.922505	0	1455.40964	6439.201017	11427.81961	815.8760209	4933.045477	12003.82941	2038.201664	3863.603903	1806.395538	4619.255524	2773.458521	0	2003.08654	11427.81961	2180.607905	4750.992453	798.177599	3784.211293	5035.668242	1942.217253	32584.53291	1284.125345	4733.737023	5396.60991	4510.977947	3928.093041	5955.338195	555.0295078	1923.862488	4044.100058	9074.099545	2896.537104	13151.26136	2236.386353
PG(16:0/18:0)	6931.458798	12452.63644	5808.99102	7522.347687	11412.39869	6194.698835	6486.891571	8506.231118	11144.12208	285.1393446	4605.462186	4350.478071	9627.971865	8415.225409	6365.094055	3413.991345	6357.835492	11905.33313	3515.66957	2766.671878	3344.523056	2060.846683	7635.143673	3685.408273	8014.131653	8093.976126	560.7959919	3206.52588	11905.33313	8543.020039	6146.457063	1873.461329	4349.525438	8385.020325	6300.948155	6070.422774	4404.295911	9810.970629	4237.882609	5071.514471	3649.056208	5931.645245	1611.851076	7206.332352	3088.783209	10335.59788	2963.471076	8537.484567	5412.812581
PG(16:0/18:1)	110533.5869	216817.9279	147441.3178	84465.16535	124503.6503	148692.6135	108999.919	148605.5629	268784.848	10747.86297	152714.8999	84957.21841	143444.768	220461.6638	86245.88398	88833.18303	194148.6289	263207.4132	84304.44188	101762.7497	70120.0589	49828.98823	136377.2718	82146.19889	187737.5646	182257.736	22693.48077	133453.441	263207.4132	81460.55432	121005.2304	24459.97864	117304.1178	195931.575	89049.26403	250638.7441	105211.0319	115149.4057	68225.98353	151887.1921	85183.39845	124734.6433	23614.60777	211005.2092	124620.6074	155480.5903	97970.59262	230774.331	76349.95425
PG(16:0/18:2)	40686.68323	52297.56797	47037.15018	19566.76611	44670.30192	26298.56151	31662.64417	56504.44954	72868.95339	3766.088251	31942.83337	33994.29037	42937.78515	51693.35746	38306.65651	25077.42772	41406.65797	80523.84259	25464.37632	49686.41301	36715.73641	23502.76442	42668.42273	28031.92276	39063.48711	44046.45804	5992.023594	30098.83606	80523.84259	22446.38043	33472.70802	10351.63213	32065.54231	40926.94827	24853.04557	102528.7359	25020.35714	32776.00843	27323.92755	38097.91118	28962.11092	23494.48759	11888.96332	51463.5517	45382.36021	68916.61794	25248.87697	65418.30997	35433.05139
PG(16:0/18:3)	935.6368357	1391.658655	1202.615214	562.0421871	1464.240157	399.3068006	2137.405644	1421.559039	3330.143676	0	696.0625	984.0871677	928.5102138	2269.693344	1056.422273	374.950882	708.7094324	1297.4508	531.2949906	842.3824686	555.8188963	0	540.7123358	0	556.9354444	821.4804367	393.8178841	2945.846555	1297.4508	558.8328458	558.1307049	0	1666.427107	664.8540861	696.3366193	4351.007425	0	1588.250634	1828.884054	658.4521435	692.2715931	0	0	1665.347194	828.7049222	1395.650169	0	1887.574364	1059.826453
PG(16:0/20:1)	2596.413064	4032.323155	1599.792012	1531.620873	1872.756184	2671.147463	535.7325113	697.7685123	5880.659802	419.2774198	699.0054688	0	2271.38335	2140.186049	667.7239236	0	1172.686972	2609.7087	1529.918476	475.1313499	586.9886542	939.8480875	943.4645967	819.0493696	1398.310182	1664.645674	278.6889222	1564.139591	2609.7087	1609.512991	695.7117422	0	1808.616672	1071.687883	1808.992199	2369.389982	1367.658015	2147.147217	264.893926	798.1080862	975.4099359	932.8167948	419.9432869	2371.218602	697.6648057	2137.54407	803.8910526	2219.762246	1175.681557
PG(16:0/20:2)	22826.10041	24196.70115	10668.44869	10435.92044	13094.98031	16878.63561	12401.90282	10071.57736	42546.80658	1536.461372	8523.554248	9998.447491	23967.40578	18331.71199	17347.51517	5616.818526	19109.26811	36016.0821	9462.282228	6945.028815	7538.663463	7440.583698	20144.29196	7644.392575	17798.23276	18066.55369	3076.145789	16304.02957	36016.0821	10165.91619	11796.06292	2539.008285	13426.33435	14633.24547	10384.93959	21589.03584	16255.85441	21009.48671	9121.29017	20539.33481	10594.19678	7356.05325	282.335829	23238.94836	8792.604646	27544.44529	4973.91731	22211.66942	17026.75669
PG(16:0/20:3)	4513.819576	6233.372428	1731.276371	1743.717407	6789.005448	3337.356255	4877.625182	3450.627431	5181.314349	277.0050092	1259.597789	1682.034558	4093.251407	5778.489284	5103.013564	1432.860702	5661.584186	11620.11597	2935.492365	1945.407957	558.9863916	1522.229998	5598.944306	1817.990281	4001.049719	4177.06015	270.7242573	11612.30567	11620.11597	3232.192805	1465.750201	1066.495309	5735.23579	2107.480985	2713.837734	6916.71183	1444.07794	5932.91737	1126.003592	4960.569241	1951.032416	2374.260871	558.52207	4922.417297	2088.219658	4243.459635	2396.875328	7729.387015	3867.984205
PG(16:0/20:4)	17937.83281	19113.83129	5640.48334	12526.02822	13329.69126	6404.561325	9102.425169	13627.16401	15781.03973	1359.514607	5250.313572	4818.698903	6861.069305	9659.287162	24949.8344	8170.939302	9528.490376	24539.15768	10424.38118	8802.121562	4688.167396	6355.114864	18315.56318	6713.912401	15183.17523	13859.5603	679.9887381	11350.7485	24539.15768	15691.28402	12339.93468	4652.769218	4771.764612	8705.53687	15339.12929	17900.70895	6243.943131	9100.779998	6673.202732	9944.978439	6443.767522	5421.744478	9078.927302	9441.616011	7319.997618	27777.28376	3723.262572	14894.51501	14204.59788
PG(16:0/20:5)	667.9758937	0	933.7095728	404.9232861	0	0	1328.525308	543.28397	1067.325355	0	0	411.6432424	0	0	0	0	0	1333.124554	0	418.3533604	396.173474	265.7865879	416.4032483	0	513.2475787	282.0672557	0	661.9402163	1333.124554	0	1204.957461	0	0	400.1288342	548.1666768	677.1930752	0	646.2893362	1095.366522	529.4874169	0	0	0	411.1213596	1221.621403	0	0	791.0293295	0
PG(16:0/22:4)	1321.10658	549.4801441	401.0299138	274.1653296	1068.188288	0	0	689.4195025	0	0	1242.954218	0	1056.864815	801.8527839	0	0	406.764773	0	799.4080731	536.9305842	265.6360017	0	1391.122943	550.5117329	682.8867061	263.4981364	265.3059891	661.0503243	0	393.0538358	784.9057699	0	278.0788999	687.2808388	1516.30552	0	1201.583433	1093.232983	692.6739926	534.9071186	0	400.6284159	0	666.4679664	275.5880372	1045.08273	400.4633663	1046.965638	507.2743613
PG(16:0/22:5)	1190.565706	1648.444029	0	680.652472	807.2495501	536.1428544	1205.879898	405.0641839	1046.369213	0	0	693.4322408	648.1968982	804.1139716	402	0	817.7345378	1047.09119	903.6103756	0	491.433369	0	692.666874	409.1382543	274.8811017	834.2564492	391.8146611	1451.639031	1047.09119	527.6332148	1139.600997	0	831.1248438	931.1642704	550.2548931	831.6286699	667.750774	644.7618227	412.6807062	401.9618801	274.7157764	0	277.9500494	692.7848026	1103.756481	1008.111674	402.101362	1049.096506	730.4412527
PG(16:0/22:6)	1383.638604	828.045831	725.7402099	645.8691013	0	1330.887484	1813.453402	273.9590491	718.6175521	0	687.0306447	550.2316029	0	1209.361592	1306.527102	658.3377151	811.2974056	492.5607615	504.8674014	404.3004064	758.2132548	397.8169524	891.0541106	1146.531326	687.3272204	886.8699819	275.8455219	978.1636106	492.5607615	1004.850255	1663.753084	0	275.0038722	605.4775676	412.7552084	412.2128105	691.9430011	963.6427012	281.2478073	566.6865362	277.8672444	0	259.4608172	277.2107146	0	1088.614003	605.21745	2090.633252	3171.656869
PG(18:0/14:0)	918.1423604	838.782741	0	0	611.3834032	845.9682578	604.608	700.7836196	1333.237024	0	282.2727429	980.5622413	0	0	482.5035049	366.8976404	0	2867.846102	265.9465295	0	929.4799	0	823.8454018	0	977.4670235	552.982216	0	0	2867.846102	0	0	0	563.2739052	363.0639515	419.6335146	1817.56328	488.5987339	697.080928	275.0050464	484.006972	280.354173	0	423.1474574	529.4677106	505.9468857	970.2909534	600.8702994	654.9542334	669.8244754
PG(18:0/16:1)	2738.323765	2117.678766	1739.476614	1809.918856	4140.698557	1872.320653	1069.78197	6593.534231	11988.27915	418.4106429	3558.024132	418.9940712	2140.161959	396.6171271	1194.468066	1201.206435	3000.063517	3839.391424	0	1518.297854	3291.591728	0	2510.084034	1092.162214	1792.066007	978.746564	566.1182457	1958.446723	3839.391424	1926.690398	681.9139355	933.7444753	3497.017876	794.087287	1674.853151	13809.34618	811.2535188	3486.279754	2233.349421	3674.670237	980.5849696	3756.727035	836.9270705	2626.386204	1723.599118	3616.262263	537.2761057	6716.111986	1047.814713
PG(18:0/18:0)	4867.92688	9032.384525	1475.597837	5442.716012	4334.344683	2986.691605	4651.979312	6582.145176	6540.980759	276.4733492	8216.271153	5286.461326	4049.821926	5270.07605	992.9018578	2654.560397	7700.908423	8804.752527	3674.707216	2919.392407	1110.638447	1252.215434	3608.93942	4995.645048	5042.488475	7019.126288	655.6404887	4512.634861	8804.752527	3871.288795	1932.905335	662.5518919	4458.958874	3110.711809	3529.648078	7381.639434	3887.677087	4000.49645	1082.455485	3466.552619	2843.525807	3089.434518	819.124353	6389.180587	2225.69126	4213.160746	2408.936839	7696.61991	3401.736409
PG(18:0/18:1)	102003.9523	187766.1397	68806.97948	70663.8779	92458.85943	90166.96932	67537.77917	72627.3565	78185.20288	6710.295037	151208.0682	59149.44276	89253.69934	108070.883	40653.89063	66106.46328	164360.356	220110.05	38056.06771	74153.2526	37021.19823	33193.73263	84611.21478	60064.42434	87755.65251	119521.8604	11169.43341	78197.36525	220110.05	77291.49732	88773.31894	16216.05202	92172.90805	101504.557	57902.67732	140522.3628	56310.56425	64223.15956	23663.6165	63987.46384	40803.82403	105032.8764	18572.04285	116915.1232	43903.4041	74206.03317	42067.14536	149302.4433	37864.97122
PG(18:0/18:2)	95945.65217	132059.8349	46274.74375	53759.84815	94448.46039	61968.35568	55326.94401	54886.78958	128313.3718	6664.102659	81545.69363	63705.81824	80193.81831	96189.15568	53109.21097	56631.55191	110647.4276	152739.8927	44907.47123	81124.69573	49801.93445	36629.46608	57691.07607	51748.41251	96046.3939	112253.0849	9825.546465	79193.85901	152739.8927	82202.17399	56843.51723	15057.94939	76198.22674	73521.22965	52578.9173	178583.4374	50022.39735	58307.37887	24532.6307	79973.70904	37840.96902	59638.23463	14650.76102	101983.1062	52891.86986	105701.2879	36517.58219	157215.3117	63328.73838
PG(18:0/18:3)	959.3005109	974.3493282	0	837.6530025	1094.627973	602.8921713	970.730855	836.1996382	3434.568157	0	699.0739024	418.9565773	0	845.2874179	2674.228375	365.1539027	971.0153694	1090.93084	395.9764803	271.8300581	266.9422175	0	1119.875582	414.4513527	978.2225839	699.8460835	280.1157818	2554.944428	1090.93084	1492.128698	790.3649653	604.0881028	1534.739756	729.393001	698.0266658	5016.754768	851.5091503	1113.330234	559.1489496	1456.368069	270.7276733	605.9127184	699.847267	1675.019954	415.8263782	0	0	2667.040416	1332.085184
PG(18:0/20:0)	1622.235011	1326.176508	454.9331505	1259.808735	768.4411479	1341.997633	1106.414679	502.4178448	1125.643192	626.7703222	1881.580051	599.5568315	740.4974933	1119.763493	762.4631572	591.5682656	867.296689	1610.657783	1948.353734	1244.581936	0	558.1471894	1139.950202	1578.653023	1244.415033	1250.525337	0	1818.094356	1610.657783	694.6442212	2022.245848	454.0528486	616.0124652	451.4828847	1245.090423	695.1688761	925.0411192	1671.325164	463.4792854	920.3084104	713.9384403	698.7097934	464.9197065	777.7865509	932.9067645	1062.193019	0	1357.27722	2535.257639
PG(18:0/20:1)	1287.604943	2356.618728	535.5542898	692.7788604	1473.472389	1091.160905	1071.305115	832.0011475	1606.927862	0	834.2137622	1823.340958	0	0	0	0	1902.588559	3599.936847	940.4744371	832.6537552	684.6204582	277.5695073	971.345681	275.0476586	972.3888768	2502.234433	278.6649334	1003.749121	3599.936847	1087.654503	1068.963476	937.2147509	1518.243397	1873.875181	0	2633.946281	937.8721774	946.7385399	553.811059	937.1056242	0	0	971.3393857	965.0045995	0	1606.16698	925.9756467	1648.983432	1146.467628
PG(18:0/20:2)	19112.27807	20478.68094	5300.46542	7067.266034	15750.93111	14623.43778	3627.422124	5126.204513	11484.50931	970.848116	9554.667158	7759.029108	11871.64063	7636.365381	6592.901258	3622.330304	16832.12257	31618.13989	6322.214502	8892.278739	5880.508761	6275.258437	10052.08275	7084.195585	11792.27145	8861.693995	2088.062371	11841.55848	31618.13989	9145.596827	9077.452938	4022.670112	13560.26714	8900.367105	6560.253009	13087.31437	6440.122177	7760.25259	2496.027229	9553.604385	4719.223781	6266.693467	1805.007909	14937.55127	4295.97992	12474.33889	5021.670771	20087.62642	6129.083288
PG(18:0/20:3)	9662.341641	9866.799699	1739.996137	2321.553802	7351.562177	2142.345323	3906.183319	3293.878456	9623.194992	692.850373	6593.189607	2346.054733	3735.664261	3896.092323	2007.322198	1173.561978	2909.748591	7465.910797	1016.466354	1783.034386	1997.959894	968.9007803	1799.716907	2432.357126	3984.24572	4201.174117	278.1491249	6684.505482	7465.910797	1880.686586	1206.624725	1339.097468	4592.938053	1708.815963	1901.377421	3358.173461	1942.231221	3506.419628	1382.28615	5405.763615	2621.327118	2279.634361	422.4463499	4152.16207	1724.221297	2848.962354	2142.10705	13205.43603	2743.535934
PG(18:0/20:4)	16642.62598	32516.67695	7846.896535	13142.58093	42995.11581	4006.567044	10081.25211	14124.00321	9420.317655	1052.413335	9396.75129	9080.818439	24049.04252	6254.720022	9234.522696	3800.109531	15611.14657	13373.64354	11825.16233	7235.329963	2634.631386	5472.217436	19684.07468	8627.797887	12389.96148	21623.13128	524.8350629	10308.13334	13373.64354	12582.76983	10482.16666	2842.272544	11429.85743	10770.55193	10170.75273	17487.56518	8644.004336	20811.67798	7378.832074	7753.117497	6701.281332	11309.71728	5822.506765	12198.4525	6242.089252	23844.88483	3729.861281	9837.690652	9986.414644
PG(18:0/20:5)	817.5411022	646.7258864	383.6158039	501.4545474	0	0	0	386.8862622	0	0	0	0	0	0	0	476.8798902	503.8218063	0	0	661.8068611	0	0	0	423.4206393	0	0	0	0	0	277.0744779	0	0	0	0	0	0	381.5899884	0	0	0	0	0	664.6675573	0	0	768.624	0	0	0
PG(18:0/22:4)	509.8294262	652.3147961	0	1044.994103	1157.787405	444.4621452	0	519.7908144	643.2	0	392.3082871	0	2058.092813	0	389.3752918	0	0	0	270.6557018	259.0754417	0	521.4379079	1317.280226	0	0	1688.542423	785.5685808	514.8856713	0	266.4255143	581.9099422	0	0	0	647.5142028	0	0	909.6133959	707.3145957	0	0	0	0	645.1524196	0	385.3472127	0	1159.178569	0
PG(18:0/22:5)	1106.562174	1057.968559	0	397.4124652	1178.043806	0	639.7994908	0	653.9199016	0	930.3613301	666.7866675	368.3319392	0	0	0	1042.527934	0	0	794.7323052	262.7666528	0	1078.419083	270.52487	400.0484228	796.0743014	0	1416.689688	0	378.7349565	392.8841639	0	0	393.9293079	678.0522814	659.1145258	0	0	0	523.0412837	0	0	0	401.3022822	0	0	0	1148.09274	737.0189811
PG(18:0/22:6)	413.0443318	0	0	0	664.3857946	0	1295.639552	0	0	0	443.1382215	469.6269268	0	496.2683724	0	0	1752.081596	537.5522984	832.167129	0	0	0	0	0	0	876.3523035	0	1208.311729	537.5522984	0	0	0	0	0	0	0	0	514.0852431	0	0	0	0	0	0	0	0	0	1484.265187	673.3045275
PG(18:1/16:1)	2276.42173	5020.327818	3796.915101	4107.999553	4704.311475	1807.064808	4723.647939	2634.301571	3086.28138	562.9442069	2973.706878	1947.174939	4367.470018	3407.087635	2802.407964	1685.861991	7162.953811	4407.639621	6307.330908	2090.711337	1595.571743	2428.982553	6132.88348	3614.419759	3789.155001	6394.550065	1844.520142	2973.498465	4407.639621	5820.266122	4384.242245	1198.417546	3806.790203	5028.992172	6480.961451	7427.478227	4283.530316	5522.750597	4041.16099	3409.02188	2818.463512	2957.200147	1549.987889	6969.084346	2622.564159	4667.750821	1682.16052	6221.660145	1601.253117
PG(18:1/18:1)	18510.56792	18892.89901	16054.15795	15418.83973	34280.68662	17128.2934	13719.43933	25241.9506	16775.58361	964.4112763	26760.22472	13886.85598	29566.45578	14214.80313	13382.15378	12825.65782	26099.07343	25434.54517	7136.334062	12399.12271	6603.011347	8440.813706	24383.7159	7680.936298	30538.77036	18825.51731	4145.064098	12985.64361	25434.54517	14734.63323	20332.04398	2926.984992	7473.637338	23087.52329	12925.27788	19399.14875	14003.23391	19038.47797	6323.786642	8777.217303	8730.274694	15928.52091	3811.946058	17168.79412	10323.229	15226.94652	10506.15994	26152.34081	13534.61851
PG(18:1/18:2)	170521.8917	27124.4315	36678.00981	24397.16376	77562.89992	26735.57974	13057.434	39612.51367	59147.62521	2232.226341	23558.42061	17494.36485	72469.62047	24904.28117	19043.73143	170384.7755	90255.71058	37127.11041	73934.46194	44144.10772	11093.26666	30230.88661	106963.0508	32776.26878	65061.08311	102791.0842	17326.89032	44028.89044	37127.11041	53865.21092	92122.93981	6860.457709	28193.1059	32710.05277	39345.69568	95350.7475	38309.04083	38061.05257	27618.13492	26977.31099	51706.51024	20519.50929	10377.72856	182580.3377	30215.53335	25299.56357	185334.9339	155335.9318	66870.28685
PG(18:1/18:3)	0	1250.672067	0	424.6909353	1606.852329	405.7465329	669.7260677	610.7907079	0	0	1110.295103	972.2735158	0	401.6067202	0	0	0	1331.561028	2174.058998	1734.948498	0	0	697.3177744	0	977.5202949	1663.036087	0	850.6185135	1331.561028	1153.935782	3088.901589	0	0	0	555.0395611	418.1606553	0	1254.414075	700.7721907	1336.379457	0	0	396.0367346	1254.312322	0	803.4663458	0	1465.036889	500.0845495
PG(18:1/20:1)	394.3359704	1198.408033	389.8502549	406.1029675	0	391.1879194	652.3092593	798.8169884	0	0	0	0	391.28	0	0	0	398.0577946	0	268.0485927	0	0	0	404.5678286	0	0	0	0	0	0	378.0361835	0	0	0	0	395.1801169	0	0	0	0	631.0190931	0	0	0	665.184463	0	0	0	0	0
PG(18:1/20:2)	795.739519	1809.229889	1473.937736	423.9336505	804.784196	536.5070467	536.3310157	700.021578	1340.767582	0	977.5004327	973.6585916	666.4850456	670.536	0	0	1450.56821	392.6778459	396.6868998	812.7113988	0	394.9948988	415.2106018	0	419.1401449	836.6012233	0	1847.637265	392.6778459	0	799.4525726	0	974.465759	808.9831864	694.7747332	423.3956238	496.9003593	975.4047258	281.3437714	535.9139026	272.3321141	0	283.634742	1531.657962	0	670.6223637	402.1582023	647.0367772	379.6881593
PG(18:1/20:3)	1090.932718	1524.228453	399.2334093	542.6097837	2815.754135	528.5944996	385.6136518	945.3584415	1836.02716	0	666.9430669	1096.811393	2126.651043	789.6765694	797.1922148	0	1372.872623	966.1183059	1805.317313	564.468911	0	258.055781	690.7427849	690.9563835	1364.226949	1361.751239	0	803.5230816	966.1183059	1017.851016	385.9794821	0	820.4558544	797.7914522	810.6603732	1081.181379	1330.144189	2100.283663	684.5070387	398.7889631	0	0	0	274.0844229	1356.297575	926.1197462	0	1512.41371	934.9580174
PG(18:1/20:4)	4905.596819	7641.669444	3704.423033	5367.666998	11456.68553	1495.372194	3424.526232	5581.161385	2886.252774	0	5621.547588	3096.502494	8902.271816	4356.645974	5909.618303	3240.863068	6293.8345	6627.423702	3495.495364	2266.743128	497.6669423	2418.804226	7405.517111	3280.960949	5082.791665	8732.784924	518.9406507	4806.116557	6627.423702	4662.358914	4073.277831	1887.226969	2620.928788	6134.210672	6898.096655	4453.846617	4460.546081	10238.0534	3396.525156	2597.50869	1649.856122	5492.10772	2264.9926	3674.456733	3303.746263	7579.288836	2346.768841	4819.04319	3645.028069
PG(18:1/20:5)	675.4865437	407.6558585	0	0	395.031387	0	0	413.9520339	0	0	383.5879497	646.0929805	0	0	0	0	0	0	501.9397367	0	0	254.6640869	268.2367578	411.7989523	273.9855241	681.6604243	279.488395	0	0	0	0	0	413.3697704	525.3107123	410.5956661	0	0	413.4145157	675.676656	0	0	0	414.1409695	413.3924823	275.5925439	0	395.0224963	0	0
PG(18:1/22:4)	496.8159245	1378.911454	505.6154721	276.6298041	400.0769532	0	0	557.2662881	0	0	553.4267947	415.6124385	869.7345108	0	0	400.5781027	815.3884999	0	765.6701122	381.1742271	0	0	1089.195877	831.4052861	968.7689462	1357.938397	0	0	0	995.5167049	391.7803837	0	415.9958042	390.6087173	782.7309871	556.0888069	0	828.4310949	413.7663003	0	0	400.2386821	0	547.9186031	0	996.7048275	0	811.2171736	532.3983314
PG(18:1/22:5)	994.5951712	992.760428	0	535.7009425	0	0	0	754.6949766	430.6012247	0	0	0	673.658347	987.5450068	0	0	407.4992984	815.1501277	0	0	0	0	565.3190354	673.7408352	1208.750851	0	0	0	815.1501277	252.2053997	520.1791619	0	0	740.820097	328.156787	0	0	559.4537948	442.645994	0	0	0	0	0	0	857.8720545	0	0	0
PG(18:1/22:6)	1000.264851	1659.045039	587.0841987	579.653072	828.9166538	471.2217954	1051.590713	594.2960206	0	0	0	588.2504969	1310.320955	990.3965919	710.0634783	0	0	943.5536877	861.1752798	614.3855496	0	0	0	0	1201.364474	0	0	1059.590907	943.5536877	382.7947246	256.2024327	0	0	332.4876807	711.2031197	451.9612058	0	1508.062798	0	834.2383077	394.6533271	0	0	0	831.8239196	0	0	0	544.4120711
PG(18:2/16:1)	7607.170302	8914.838465	6528.774275	7893.41979	7447.817709	6273.06405	10107.30015	2424.218006	8113.903162	820.6760207	7991.719121	5744.67638	4922.954078	5986.334059	7281.68292	3220.841673	9441.491455	11765.39067	5598.864669	6381.284992	3124.818411	4750.720963	7228.317216	4969.276523	5772.763837	6941.454109	4153.85941	8851.861348	11765.39067	7279.404188	3254.850217	4379.344534	5520.159863	9144.572665	12338.0972	3181.345268	5134.173699	13485.25739	7493.213593	4081.22786	5295.685873	1779.791893	2108.639893	10184.12139	7708.952135	14760.25852	3495.050024	10569.0759	31279.24672
PG(18:2/18:2)	20405.75243	27670.84738	7519.460163	15180.24633	20846.76808	3000.686423	10352.05322	6723.966468	6257.39347	0	12710.46763	12565.94368	28287.1529	8453.542383	13746.86153	5109.424637	20103.6699	8941.331257	13583.97324	5741.283575	4664.593229	6588.441568	23551.48173	9990.419978	8912.073518	29045.98918	2090.331503	9457.973172	8941.331257	6044.032241	7048.372704	2916.517424	7740.140432	10418.17288	21629.50593	9681.397033	11731.60461	18275.65542	7948.864553	3746.623665	6151.069726	8541.731823	2425.627149	13242.46603	8103.317728	16276.21926	3920.178303	5722.557752	10641.91396
PG(18:2/18:3)	3624.220499	1904.076397	704.2133309	1032.623903	2241.524306	0	2483.40119	1100.685812	1401.469711	0	0	0	2634.549551	1035.636788	1149.292715	897.2766831	1746.182964	1195.224268	2575.186522	0	0	875.8948846	647.2275977	2363.585308	1176.438033	2222.934896	0	2982.094997	1195.224268	1394.910411	1909.965679	0	1367.483019	1017.753603	1651.85897	1656.28737	0	1330.653171	1319.983532	1348.509191	1577.217309	0	1036.949497	1984.361653	0	1385.760554	1703.824504	2208.678896	1619.689784
PG(18:2/20:1)	380.262867	0	0	0	0	0	0	0	0	0	0	0	0	0	0	0	401.3627907	528.3129686	403.753135	0	535.3474618	270.5887642	256.6368245	0	0	267.9510679	0	374.085646	528.3129686	0	422.8677234	0	0	0	409.2545531	0	338.0941671	0	0	0	0	0	270.9011506	0	0	0	0	0	0
PG(18:2/20:2)	4076.762909	2438.607354	750.6830738	1447.875752	1336.659061	1808.890373	1238.471541	1612.84124	800.1723067	0	1099.660963	1384.693609	5490.738488	1719.309891	1372.719887	3434.840998	2804.168856	2206.540842	2671.315904	1731.342207	0	0	5816.990949	0	1927.682761	3294.658409	0	3003.118638	2206.540842	1154.623244	1809.667215	0	320.511191	2325.320859	3970.104155	1173.537437	2179.253531	0	1996.066794	1487.831404	1538.50434	479.7105443	0	2746.934049	0	0	2990.724521	1813.226955	2548.727365
PG(18:2/20:3)	1833.611494	1634.526144	0	357.6610615	865.4096866	1435.80568	767.6224277	0	494.3035635	480.8963873	631.3017239	0	0	448.9173232	927.0264736	0	1888.453578	776.7135524	713.9541375	375.3495751	0	0	762.8185997	374.5082699	840.8189627	361.285241	0	0	776.7135524	876.9626792	458.9011154	370.6140688	0	0	960.8601905	351.4111353	1175.64046	362.4466386	0	370.1913485	646.3929352	0	0	0	358.881746	0	0	491.871144	1283.043611
PG(18:2/20:4)	4728.011938	2894.885042	1944.227088	1404.392003	5808.475437	2045.147216	5414.685517	2506.483397	2551.895637	0	2050.12429	2530.234405	2580.747809	2189.144263	3400.258991	2534.847799	4947.646456	2983.774869	3314.972302	2830.624734	2202.468528	988.0099198	7100.173765	2995.24223	2130.496362	3045.273066	804.0132488	1953.666873	2983.774869	4164.345341	2728.677324	1225.540432	1347.445653	4390.064969	1206.975695	2006.945761	1940.487436	2506.147482	1877.503063	3136.167543	1904.791631	2027.830523	1014.548725	1676.132111	1671.586587	3660.732369	1077.134014	2441.800419	2444.334751
PG(18:2/20:5)	503.9154662	0	532.0372586	0	534.392	557.7319804	396.3718782	0	0	0	0	0	528.7109049	717.630999	539.1399048	0	502.1105111	516.3535194	668.2967935	396.590595	0	0	812.2585523	0	0	0	0	510.6214833	516.3535194	384.8274056	0	586.8413043	0	0	0	0	0	902.9774631	0	468.2815215	568.7759709	401.6889945	0	0	0	400.928	0	388.9183988	0
PG(18:2/22:4)	640.5445812	0	0	362.3283714	0	0	365.6766299	370.2930434	367.16	0	614.3015606	616.6608641	0	0	0	0	919.3807513	485.8529456	0	252.987928	0	0	503.5866716	0	0	489.1060608	0	0	485.8529456	378.8493889	396.1560696	0	0	856.8546382	0	0	0	0	638.4261355	0	366.8011618	0	0	0	0	0	0	0	0
PG(18:2/22:5)	371.5298525	0	0	0	0	353.4780406	0	0	0	0	0	0	0	0	476.290484	0	0	371.0209533	0	0	0	390.7855527	387.1889017	0	0	392.8997811	0	528.639865	371.0209533	384.3712012	396.632535	0	0	0	0	0	0	0	0	0	0	0	0	0	399.5378414	816.6792365	0	366.5290609	0
PG(18:2/22:6)	770.3167402	659.2703815	0	658.7020358	651.7689181	510.3073985	527.3107888	465.252004	0	0	623.0733294	0	1171.417277	0	0	0	375.0910022	512.3277659	0	277.2922471	0	0	0	0	0	914.0303901	0	515.0086506	512.3277659	518.0902765	402.610187	779.9942708	399.4006916	781.2169775	0	0	0	0	0	0	0	0	933.2741961	406.3011859	0	0	781.3513826	0	772.7920931
PG(20:0/16:1)	0	0	0	0	0	0	0	0	0	0	0	0	0	0	0	0	0	282.3677713	0	260.2471184	0	0	0	0	0	0	0	0	282.3677713	0	0	0	0	0	0	0	0	0	0	0	0	0	0	0	0	0	727.2111936	388.196458	839.5530161
PG(20:0/18:1)	2255.544677	0	1020.216501	0	516.9604288	1161.780928	0	0	0	0	0	0	1612.975722	519.9933933	0	0	1333.821354	1369.460566	672.2407695	393.9646607	415.0765499	417.0950161	1573.208987	0	636.8822783	454.4769786	573.1148827	1181.654346	1369.460566	962.6380952	667.2011371	0	0	720.3535457	858.3429984	0	0	924.541286	0	446.3842236	0	0	0	1316.550182	0	505.85339	945.2537682	1354.980632	0
PG(20:0/18:2)	1707.636192	0	671.3468125	1177.888148	624.0697055	0	0	0	0	0	0	0	1785.609866	1145.705206	964.4664573	1053.71533	645.5914152	1504.112456	1039.244452	874.1132634	401.7561647	583.9977954	0	0	0	0	0	1236.238333	1504.112456	1551.384555	768.4073732	0	0	0	1105.975371	0	0	789.9348594	0	939.6836918	0	0	0	0	0	0	0	877.9469961	610.7815144
PG(20:0/18:3)	0	0	0	0	0	0	0	0	0	0	0	0	0	0	0	0	0	477.40364	269.6354091	0	0	0	0	0	0	0	0	0	477.40364	0	0	0	0	0	0	0	0	0	0	0	0	0	0	0	0	0	0	0	848.1431101
PG(20:0/20:1)	0	0	0	0	0	0	0	0	0	0	0	0	0	0	0	0	0	0	0	0	0	0	0	0	0	0	0	0	0	0	0	0	0	0	0	0	0	0	0	0	0	0	0	0	0	0	0	0	0
PG(20:0/20:2)	0	0	0	0	0	0	0	0	0	0	0	0	492.2424935	0	0	0	0	0	0	393.2342601	0	0	0	0	0	0	0	0	0	0	0	0	0	0	0	0	0	0	0	0	0	0	0	0	0	0	0	0	0
PG(20:0/20:3)	0	358.3292163	0	0	0	0	0	876.1571913	729.8261287	0	0	0	0	0	0	366.624	0	369.2706426	0	0	0	0	0	0	0	0	0	0	369.2706426	259.0398284	0	0	0	0	0	0	0	0	0	458.3731864	0	0	0	0	0	0	0	597.4960757	0
PG(20:0/20:4)	1045.766817	808.4395708	802.1548699	805.8247103	600.4153977	898.6709324	563.6749284	598.5986705	0	0	502.9770512	773.5545884	1645.322752	690.4781657	1293.50212	0	1316.74494	763.1073604	1120.924707	873.3460151	0	252.1777781	1204.168258	1455.414846	0	787.3911039	0	1151.598936	763.1073604	514.0087422	814.6855456	538.2910759	840.9249527	645.5760832	0	0	0	1276.520387	0	0	0	0	0	944.3803199	0	1755.363194	0	1191.688876	1190.415054
PG(20:0/20:5)	403.2006064	0	0	0	0	0	0	0	0	0	0	0	396.9004918	0	0	0	528.7979684	792.0779171	0	0	0	0	0	0	0	0	0	0	792.0779171	0	0	0	0	0	0	0	0	0	0	0	0	0	0	0	0	0	324.6905185	689.9293222	0
PG(20:0/22:4)	0	0	0	0	0	374.8259479	0	0	0	0	0	0	0	0	383.9377764	0	0	0	0	0	0	0	0	0	0	0	0	0	0	0	0	0	0	0	0	0	383.0933055	0	0	388.340328	0	0	0	0	0	0	0	0	0
PG(20:0/22:5)	0	272.084312	0	0	0	0	0	271.0389784	0	0	0	271.1179762	0	0	0	0	328.9424307	0	0	0	0	406.8375965	0	0	0	0	0	0	0	0	0	0	0	0	270.7374584	506.5926755	0	0	0	0	0	0	0	0	0	0	0	0	0
PG(20:0/22:6)	330.6744333	0	0	0	0	0	0	0	0	0	0	0	0	0	0	0	560.9605954	661.4763303	0	301.5473159	0	0	0	0	0	0	0	0	661.4763303	256.6444105	0	332.8264117	0	0	0	0	0	0	0	0	0	0	0	0	0	0	334.1055713	0	0
PI(14:0/14:0)	578.2686356	0	0	0	1116.01165	529.3761403	549.378189	0	0	0	0	0	0	0	0	0	0	0	0	0	0	0	0	0	509.7187181	0	0	749.5370201	0	0	0	825.6188643	0	0	0	0	0	0	273.5506024	0	0	0	0	0	0	548.3137787	0	589.6769041	0
PI(14:0/18:1)	2674.80251	5753.592087	3091.167359	4678.566807	5675.44543	3102.439059	4553.329251	7652.828974	4545.080961	0	3090.811964	3324.896557	4128.768576	4369.828937	2619.780536	3471.988686	3988.872881	6017.093327	4067.264625	747.0327568	1173.039182	1467.293451	2776.255387	4376.601714	5168.486157	2910.849032	2015.404435	1951.151228	6017.093327	2650.477414	7328.701406	1119.819676	8848.040364	2950.312751	7536.548163	3996.14079	6343.776442	3530.56821	13209.56645	715.1628086	2288.19535	2268.097472	2451.925341	3420.930639	884.1876984	8243.487727	4513.480151	2838.766145	2806.580311
PI(14:0/18:2)	6929.099146	11650.58282	4380.499391	12984.21703	13460.72796	6773.596508	10888.90751	6517.642712	1943.45078	1132.243132	2933.117758	12425.07019	6908.93949	11381.07308	12080.97285	6860.613015	11504.52885	17190.08742	7745.722329	10474.41494	4738.44406	2348.102289	10404.51423	9961.076955	15190.32902	11603.2006	3761.969582	11173.201	17190.08742	9041.637012	13668.27272	3700.892901	24783.90377	7674.674495	12143.66943	4880.235064	13065.79161	13617.31374	21775.43649	7673.394767	11477.56072	1934.492611	2884.272715	9650.23204	3872.899054	16620.04661	7365.257774	12284.69703	18726.16905
PI(14:0/18:3)	0	0	0	0	0	0	554.6182512	0	0	0	0	0	0	0	790.8561308	0	0	300.0031554	0	368.9271015	0	0	0	757.7673879	0	199.6589307	0	595.3696403	300.0031554	0	395.4708973	0	0	0	0	379.6031562	0	340.2242939	0	0	0	0	0	0	0	511.9663898	0	0	0
PI(14:0/20:1)	1056.240119	0	0	0	0	0	0	0	0	0	0	0	0	549.9415235	0	0	0	2015.537159	318.1045027	0	0	0	0	0	0	0	0	0	2015.537159	0	0	0	0	0	0	0	0	0	0	0	0	524.4730281	0	0	0	0	0	592.6242383	892.3642576
PI(14:0/20:2)	1009.925411	0	0	0	0	0	0	1161.298541	0	0	444.5432325	0	570.9892127	0	0	0	494.2053059	522.0779373	822.7942657	255.7299075	0	0	0	0	850.9809649	511.6674647	0	0	522.0779373	549.329538	784.2071791	0	0	0	0	874.55551	0	592.1972807	0	563.6917073	0	0	0	869.7931436	801.2540974	852.2334381	0	0	1629.64359
PI(14:0/20:3)	3793.242722	1645.154192	4240.826459	3041.641201	2083.222308	3508.889558	2696.357637	2837.800142	1135.96332	1142.903114	599.1210907	1460.210698	4044.59154	3355.394935	1280.741328	2446.252587	4057.621109	4721.390422	2367.702332	2868.044016	3002.710004	4119.194984	2476.737681	3464.381439	1642.115665	2101.532562	973.9478958	5220.827956	4721.390422	1423.249601	1970.466809	2501.108803	2626.230473	4475.242222	4096.398812	2981.86371	3879.22738	2587.526307	1590.753024	1969.358325	1085.417546	1079.371316	1901.93646	4733.014199	3054.059094	2107.258736	1400.901748	2520.206801	2689.817614
PI(14:0/20:4)	9732.110496	6722.369562	7248.594916	8942.19104	6397.855059	1510.87406	6639.89225	6969.576178	5246.320027	0	8397.361932	7537.098116	5575.476514	7627.563868	7331.589796	4256.431333	12492.82727	6878.830878	7082.956188	7508.749874	580.9372803	1436.914563	8239.738093	6537.55658	8816.45954	10520.0483	1899.486888	4667.656792	6878.830878	4313.791212	8658.215987	2015.564934	7299.870699	6583.959366	15138.43504	2001.511892	4679.665818	7422.49559	8701.291304	10071.01965	3510.336241	2589.347436	2963.324003	5359.807892	1421.80192	5874.539655	4118.741085	8482.371436	9439.223496
PI(14:0/20:5)	1513.121924	555.1308107	0	1431.139965	0	586.7054987	1737.026307	2838.166221	0	0	1956.807325	540.4323129	878.7311298	2183.412332	0	0	448.5464911	906.542453	2015.650987	0	849.392136	0	1422.484285	550.8901548	547.4548878	1104.019092	0	270.3618154	906.542453	1157.579986	0	0	807.5624244	1446.198601	1136.717689	572.4618645	1460.830059	0	2160.376348	1555.877024	0	0	550.3926624	0	849.1730683	1166.084111	0	1747.895861	887.491573
PI(14:0/22:4)	2120.002329	0	0	1127.990005	860.7287097	0	585.0448666	1694.858477	0	0	0	1076.90567	1203.406259	1173.82957	3553.609025	0	2389.684779	0	1158.791098	575.6095961	576.261824	1146.095947	1707.180553	2271.400165	0	1093.863829	1642.415239	1196.193578	0	577.5704998	2019.790645	0	0	2636.810339	0	556.2610129	1444.647029	0	1353.15855	885.0638133	0	587.3322916	0	0	0	2043.862811	0	2982.655858	1502.149021
PI(14:0/22:5)	1207.199425	1664.003612	0	856.4542934	2034.746918	0	1103.146854	1300.56982	722.2874612	0	574.1851071	689.9909086	1316.567423	1742.840267	1164.51184	0	1492.873501	902.0505602	869.4433502	868.9040189	0	0	836.5408675	1422.092734	0	1920.875032	807.9500924	1803.847612	902.0505602	1149.023364	3181.060854	0	1076.769736	1380.153256	1402.91788	1382.842063	0	1412.291829	0	1455.887461	826.624274	0	1729.52491	1006.015763	0	2038.258987	893.3851273	2689.480026	2398.991054
PI(14:0/22:6)	2728.139187	0	0	1268.320953	1365.954156	0	1100.256244	0	0	0	0	0	0	548.8919831	0	0	1185.578233	2671.588462	0	708.0654268	0	0	0	0	567.0797208	0	555.274513	1185.785941	2671.588462	0	0	0	518.9548338	824.7026629	0	0	823.6095773	0	0	0	0	0	0	480.919727	0	560.5376006	0	264.7141754	0
PI(16:0/14:0)	604.9782237	0	0	0	0	0	0	0	0	0	0	0	0	0	0	0	616.4287634	711.4221241	0	0	0	0	0	0	594.0928047	0	0	1096.098162	711.4221241	0	0	0	0	0	0	0	0	0	0	0	0	849.4541392	561.3485337	936.2791268	0	0	0	593.7345871	897.2951793
PI(16:0/16:0)	3734.38753	0	0	934.3363489	333.1461702	0	0	512.7002744	1880.313357	0	0	0	0	0	0	0	0	0	0	1004.257846	0	0	0	884.0639704	0	1512.874048	0	0	0	0	909.4526642	0	487.1563803	354.7151056	0	1283.503072	893.4543343	0	1036.276382	1128.947013	708.5234625	0	0	0	917.5691325	707.6141159	0	803.5980611	2140.822196
PI(16:0/16:1)	0	1784.367994	936.0976337	0	733.5648627	0	0	1391.394405	3590.770281	0	0	2207.243294	0	0	0	0	0	1566.991393	0	0	0	0	0	0	1132.490176	0	0	0	1566.991393	0	0	1523.176054	0	0	0	2094.464858	1483.627381	913.6361057	0	1314.270875	1559.047807	0	1377.380519	1132.434118	0	1823.075387	0	0	0
PI(16:0/18:0)	5770.605131	2861.052389	1846.614334	1619.559828	3898.897839	1497.444475	6849.408595	2195.921336	1820.304627	1028.063051	3088.520585	4523.458276	2985.490491	4893.623504	2146.252822	2083.252833	3748.441814	2188.222459	708.9618312	3518.252289	0	1490.376962	3532.908869	2816.428709	1596.725448	1665.593326	0	3579.85533	2188.222459	1688.905077	2150.610122	2355.132578	2305.106669	2970.974899	2565.170075	1909.090371	4224.373543	3499.9552	3064.876669	3447.222982	4662.464438	0	805.2497402	3649.433071	1032.469672	6831.044023	0	4865.380794	2552.764598
PI(16:0/18:1)	6747.275345	4639.260289	4168.933068	1626.378067	13693.40752	5047.476933	5517.840615	6049.818154	4053.891101	0	1282.965193	2351.282401	1673.858838	5823.465436	4267.521134	2379.287185	0	1620.535891	2491.311874	0	1984.485551	2509.681178	3613.77347	1526.43472	8929.664996	0	0	2459.206087	1620.535891	1518.924555	1244.366052	2247.532658	2786.964218	3417.652754	3957.85207	6163.965759	6783.869365	5804.181838	2778.364936	2772.275938	3991.59863	2017.315695	3040.066353	5379.921837	3986.73319	6381.883556	1900.446624	1491.907126	1054.107539
PI(16:0/18:2)	5406.067635	3400.627338	10622.8337	5542.560794	10902.13158	7696.594454	2517.204062	6950.127783	14343.37633	4535.828714	1564.898024	5414.532378	3764.36069	7985.541341	4319.793978	1400.126721	0	3086.006684	2329.251401	4894.494871	2251.931915	2769.188081	1384.26925	823.7149467	6477.454296	629.1684431	5439.185461	932.1766287	3086.006684	1946.152485	2056.059381	2679.221261	4204.116	2460.56246	3883.538968	6136.716066	4648.040864	6344.440267	3865.615676	12398.75489	10695.50429	2325.981631	7975.322521	5617.955561	2514.772115	15595.84247	8355.427493	1949.312079	2935.310363
PI(16:0/18:3)	562106.7289	962700.6186	145054.5574	413676.5185	519118.678	254339.3125	494822.9914	259340.928	639046.9688	33596.17208	254174.3958	238862.3136	214288.7128	287984.0681	284762.9109	196928.1333	391054.6891	662833.0513	398567.1946	196471.6221	112274.7015	88189.00701	398587.5298	325754.0385	194163.7129	426204.2113	64945.12977	1292476.836	662833.0513	302215.191	269649.5239	123144.4801	674193.3624	313758.2247	622692.062	625523.7825	252443.0481	506594.7973	377264.4374	368368.9085	412518.0567	140754.2825	130375.5151	336702.0815	163616.93	428418.4958	264013.5444	631925.8104	395023.1867
PI(16:0/20:1)	0	0	0	0	0	0	0	0	0	0	0	0	1518.17718	0	955.6227467	0	0	1041.035831	982.9131283	0	0	0	0	0	0	0	0	0	1041.035831	0	0	0	0	0	0	0	0	2082.126171	0	0	1033.767257	0	0	0	0	0	0	1056.173701	0
PI(16:0/20:2)	765.5874504	1053.259437	0	2086.032078	1572.402301	0	0	0	0	1044.819398	0	1041.905742	0	1539.502168	1047.891703	1835.038885	0	0	0	0	0	0	0	0	0	0	0	0	0	0	1005.938575	0	0	0	0	0	1573.37857	0	0	0	0	0	1557.716792	0	1042.597516	0	0	0	0
PI(16:0/20:3)	2643.893737	0	390.3562438	0	0	291.2971504	260.5332226	0	0	0	0	0	0	0	0	0	0	0	1566.527954	1045.368216	0	0	0	330.6049495	261.4435613	0	0	0	0	0	949.0978802	436.3115023	498.3719184	246.7063498	512.4130067	0	466.6694599	855.0156139	365.7037747	0	247.5780445	0	0	0	0	337.0264948	348.9224108	1587.181777	0
PI(16:0/20:4)	4918.244224	18382.3035	7366.248484	4320.420072	10399.56326	8380.529935	7928.592591	16613.57237	11898.96957	1610.418695	1897.606156	2566.420523	5024.546722	7499.920885	2682.785904	2539.772964	1042.61047	3563.347934	4351.337646	2413.453813	1059.848755	1404.716592	5879.156024	2125.266733	17697.27718	5428.808219	2615.378287	1582.711373	3563.347934	1914.775151	4429.457983	1643.055557	4383.663236	2164.485121	9762.947733	30987.68058	3522.119138	9384.442165	4558.032892	4980.12065	4232.236903	3169.792377	6420.756016	4879.73206	4490.894241	19954.93933	3119.657481	4848.357514	1675.189727
PI(16:0/20:5)	0	0	0	1006.03591	0	0	0	0	0	0	0	0	0	0	0	0	1028.310946	0	0	0	0	0	0	0	0	0	0	0	0	0	0	0	0	0	0	0	0	0	942.7893236	0	0	0	0	0	0	0	0	0	1533.069261
PI(16:0/22:4)	1466.08974	0	0	0	0	0	0	0	938.4092265	0	2079.948519	0	0	0	0	0	1591.017041	0	0	0	0	0	0	0	0	950.1826698	0	0	0	0	0	0	1025.982434	0	0	0	1757.202891	0	1198.217384	0	0	0	0	0	0	0	0	0	0
PI(16:0/22:5)	1866.561002	2102.78031	0	1564.072779	2139.282182	0	1568.774769	1433.049655	0	0	0	0	1021.106967	0	0	0	0	0	0	847.4201623	0	0	1046.656501	0	2613.618072	0	0	719.7204815	0	1571.499428	1030.712421	0	0	0	1553.78329	796.7795329	1573.427731	1235.20257	0	1461.39501	0	0	0	1042.969395	1554.208626	3473.982983	0	0	957.2014652
PI(16:0/22:6)	2615.975724	0	0	0	0	0	0	1414.765871	1049.412509	0	0	0	0	1560.517487	0	955.5435265	1447.692273	0	0	1541.808306	1425.998312	0	0	1057.149525	0	0	1054.404592	1625.501712	0	0	0	0	0	0	1564.942216	0	1573.538557	0	0	0	0	0	951.3367757	0	0	1047.900692	0	0	950.0581687
PI(18:0/14:0)	0	320.6180393	0	443.499666	0	318.1759531	0	0	622.0154141	0	0	419.0003177	0	659.1719384	0	0	394.7770505	0	0	0	0	0	0	0	0	0	0	0	0	0	293.4183967	0	0	340.0011339	0	0	0	0	0	0	0	0	352.6395258	215.7687502	0	217.4836297	0	483.2455507	1042.852189
PI(18:0/16:1)	1393.325295	1534.335681	0	1051.985193	1558.051109	1039.831439	0	3105.5189	1695.155413	0	1055.560556	1041.896521	2099.182286	0	0	0	0	1550.699821	0	1494.902215	2006.642644	1574.526236	0	0	3588.167153	0	0	0	1550.699821	0	0	1046.360174	1027.371416	1571.050959	0	7229.666107	1527.682191	3834.596419	1765.607196	2907.283069	976.4766889	0	1560.567839	1576.260251	2798.319365	1023.338283	0	2142.146578	1573.231136
PI(18:0/18:0)	2884.859995	10959.52329	10565.54482	1555.364901	4506.509797	3412.315588	5036.247923	1994.416692	2411.242435	0	3439.485466	4158.302068	11162.2154	2263.264453	2696.902888	2019.254543	3527.941674	2592.189884	0	1181.936552	1500.764285	1015.035871	6556.463615	2549.925705	4339.449273	3123.905256	3093.806742	2995.026041	2592.189884	1988.063861	2497.817104	0	2324.719543	12571.72828	6270.124404	2983.730403	3553.275957	9716.382749	10081.9139	7510.547537	1453.072811	2066.712207	0	10725.55888	2541.737324	2800.583465	2603.389524	4068.984849	3624.663626
PI(18:0/18:1)	1890.699306	4407.251652	3972.925037	7015.617816	5580.901649	2564.258888	4205.045625	5862.522029	4342.644734	1016.905209	3451.253213	2938.511517	4651.190118	901.0132932	3101.448407	2491.946014	841.0380435	1273.927497	2373.737047	0	1318.538932	1967.960279	1503.522373	1517.772261	5926.783131	3269.293299	2619.687601	1816.110051	1273.927497	1512.824681	0	1929.938819	1368.975161	1744.706213	3179.398286	12049.72047	3440.507651	5720.857133	2902.599005	4378.701728	4625.27503	1330.257212	4344.648865	5850.974631	2463.249746	1981.835133	4607.962647	1032.828408	2083.725746
PI(18:0/18:2)	7253.462756	10365.26831	10196.51274	6133.801595	21764.97829	1811.534698	13787.1049	17568.918	19891.92269	2874.285867	6805.177713	9562.594001	12233.20499	10797.11636	15905.43467	4761.190754	0	2931.760189	1586.553935	6068.951327	3379.287706	3950.029391	10170.77258	3711.613347	4554.997539	22713.01439	6840.3998	0	2931.760189	2913.761946	808.5470434	9361.901016	6168.732099	9448.356821	6767.019717	12708.50025	6251.955503	4762.66233	8292.568075	14853.57445	4310.638383	3350.822135	2514.895214	16963.77792	5727.494928	11211.9736	8505.108413	0	2223.201026
PI(18:0/18:3)	0	0	0	0	0	0	0	1042.96217	0	0	0	0	0	0	0	0	1490.530302	0	1041.310249	1038.162278	0	0	0	0	1419.959895	0	1053.501693	0	0	1514.583842	0	0	0	0	0	5465.174162	0	0	0	0	0	0	0	1569.085415	0	1498.58764	0	0	0
PI(18:0/20:0)	709743.3682	698305.7677	324231.2561	269792.1365	744868.8511	562801.9646	639269.2359	701744.8876	479258.6	9500.447503	519706.9975	605369.2793	479699.4108	531747.7519	171301.2049	337863.9197	764014.9965	725973.6314	312743.0431	322515.3677	138901.5945	80538.90684	336026.1345	437838.7313	506299.0188	516728.3162	124533.3257	784054.9685	725973.6314	342261.5342	448258.7048	53499.00871	592995.4211	440899.9589	227583.1796	403064.6942	440545.8388	323932.5383	252175.5989	498492.7178	221128.0966	200658.7853	74936.40757	397055.4747	199090.636	207241.9065	277635.6401	694860.414	309742.7697
PI(18:0/20:1)	0	0	0	0	1049.517764	0	0	0	602.7781375	0	0	0	0	0	0	0	0	1079.350174	0	1039.910114	0	0	0	0	0	0	0	0	1079.350174	0	0	0	0	0	970.0484889	0	0	0	0	0	1400.614104	0	947.8728942	0	0	0	0	0	0
PI(18:0/20:2)	1586.776058	0	1573.611384	0	2399.192757	0	0	0	0	0	0	0	0	0	1571.199519	2581.210103	1000.34414	0	0	0	0	1552.26217	0	0	1928.532045	1411.145315	0	0	0	0	0	0	3091.404868	0	0	2294.976343	1040.274198	1546.383654	0	0	1554.21767	0	0	0	2715.369592	1444.972839	0	0	958.9578802
PI(18:0/20:3)	26227.68983	21943.36041	5353.659254	14005.48018	15667.82493	9832.191425	5493.253358	4685.164212	2218.219124	2037.328009	3147.487379	1911.422657	4434.325071	5113.988672	4297.116329	4507.734628	1438.985347	0	925.6023339	5566.473019	0	4014.287955	2602.758594	1426.510238	9588.60106	7083.509171	4187.782608	1816.024978	0	1236.527183	2620.251814	3734.670183	9945.302992	5707.525311	10165.85135	10556.20011	3349.585552	7777.032222	3229.444861	6185.638946	18175.26411	4042.058606	7137.431219	7060.612352	6078.124985	3613.181068	3060.544346	0	0
PI(18:0/20:4)	30978.34769	55250.30868	26235.78542	87910.21056	193979.9137	91991.63532	95994.23436	85925.13115	35206.06158	18259.91715	12646.58796	46461.87314	67358.68034	44627.1513	77500.58718	12931.43468	4468.171992	9953.128485	6086.586948	16446.04357	5838.830845	4052.621253	16184.66482	11013.96248	352637.2133	40006.75078	32808.69366	4526.871127	9953.128485	4280.256633	4934.827094	21723.45288	23374.21928	38390.66195	30480.96671	128516.4078	40783.18395	15683.623	15470.37027	34276.99095	27990.988	16608.61286	58498.97206	149838.4402	17374.46397	66703.03992	17451.73775	3753.213732	4571.646855
PI(18:0/20:5)	201.0778514	368.1639283	204.1812163	0	0	0	0	0	252.2133592	0	0	0	0	272.2070282	226.1234374	295.3814905	255.8243608	319.4236165	0	0	0	0	268.8841848	0	0	233.8266708	0	0	319.4236165	0	0	0	0	207.0606905	0	0	0	0	0	0	0	0	237.5194369	0	0	0	0	212.1877311	0
PI(18:0/22:4)	1474.772316	2517.559757	1573.680785	1559.665187	0	2924.817222	1038.537292	1212.140908	0	0	1548.061075	0	1366.847232	0	1250.032474	2792.529829	0	0	1293.159956	0	0	1470.629134	1027.806851	0	0	2051.334616	0	0	0	0	1552.099353	0	0	1040.689837	2594.011361	1571.589703	0	1885.734607	1033.68426	1541.435701	1042.043678	0	1530.97796	951.6674194	0	2419.89698	2603.724683	0	0
PI(18:0/22:5)	1458.494244	2130.937091	1386.90887	0	1460.524107	0	0	1027.711602	0	0	937.9243748	0	3115.162649	2594.554413	1011.225611	0	1057.467235	3788.379527	0	1051.92004	1020.179943	0	2236.019748	1053.948587	3941.880448	1316.348895	0	0	3788.379527	1563.503947	973.1309291	0	2088.963929	943.6010799	942.247613	2316.750876	0	1697.90431	2057.994786	2336.456087	1042.885613	0	1541.412098	1027.519089	1452.468635	1462.098723	0	0	0
PI(18:0/22:6)	2432.891004	3129.25656	2096.013405	1052.797872	2873.485698	1181.31119	3655.283112	1753.387203	1445.237191	0	0	1565.368392	2812.334763	2224.489565	0	0	0	0	0	994.5888214	0	0	1879.325039	1019.343412	1514.481177	0	1541.161024	0	0	0	0	0	0	0	0	1660.625005	2739.773775	5158.038645	1577.747529	1719.466837	1046.934262	0	2569.818614	1172.881634	1023.766793	0	1800.395495	0	1039.288135
PI(18:1/16:1)	1073.218065	2511.896628	1289.607754	2121.598224	1927.441056	1010.034789	2688.903458	1432.890992	2467.167314	0	1144.099263	1181.779709	0	2326.122662	1049.517764	1037.889698	843.6440318	0	1859.788195	0	0	0	917.0190653	1049.656444	1564.084904	747.6667572	0	1624.890398	0	1021.264585	751.1873152	0	2071.592442	1393.037443	1205.064759	0	634.7627833	2612.261455	1419.014866	1437.057521	0	948.0309591	1043.156062	0	3159.507687	2770.429155	1036.200986	1519.825492	1048.582761
PI(18:1/18:1)	2042.901809	3742.256834	2975.936308	5392.470553	8383.027398	2151.191961	3570.079858	3080.060534	3159.465626	0	2603.093055	4301.527175	2270.729261	6259.653754	3867.702883	1447.256508	1026.656036	715.7574884	0	0	2947.055541	2451.899091	3681.824165	2082.205596	14488.78459	1545.438851	2608.886002	0	715.7574884	0	0	4141.846661	1359.102128	3965.469269	2384.237169	4202.086952	2151.152379	4219.828796	2984.669358	2061.804315	3497.639032	3940.480808	6844.975693	4862.740039	3842.511478	3727.060685	0	1928.260003	0
PI(18:1/18:2)	3731.980662	7022.51468	1071.76606	2420.310816	2970.300884	0	10614.74656	1267.099847	2891.87358	0	0	2840.102011	1305.10318	3190.356905	3114.265306	3649.867355	2176.426557	2919.16871	2600.613573	2166.81087	1731.075264	2435.00946	3918.298826	2362.771679	5481.176757	2647.322295	1917.795497	1904.62385	2919.16871	3118.113623	2592.329359	3581.652648	3964.406881	7138.85008	2499.447011	5219.871738	2102.872132	5399.674936	5283.033992	1566.99507	3044.955385	2450.177748	3553.923469	2862.935854	2224.768091	3432.554453	3229.769702	0	3087.238033
PI(18:1/18:3)	0	1518.882451	354.7345892	1314.094915	0	685.3912207	0	0	845.0362785	0	0	0	0	333.1654468	0	0	0	0	0	0	0	0	0	0	0	0	0	0	0	191.096326	0	0	0	0	0	0	0	0	0	290.999916	0	0	0	249.7211413	0	0	0	624.6085885	0
PI(18:1/20:1)	0	354.4361038	417.7387617	0	0	208.8358595	659.5686632	222.342749	208.6664005	337.0119494	0	248.4032297	0	0	0	0	0	0	197.6225663	0	345.9541544	0	0	0	0	0	244.5140911	0	0	0	292.4886415	222.5683767	238.5884562	0	0	0	0	0	0	0	0	0	0	0	248.775136	0	0	0	0
PI(18:1/20:2)	0	0	0	221.7972507	0	0	0	0	0	0	0	646.0379637	226.7000437	0	215.2450725	1049.609262	0	0	0	161.3841003	0	201.8969805	0	0	0	235.0370007	0	941.5643266	0	230.6695634	205.6094663	0	0	0	938.0080425	370.00559	0	0	0	0	498.1501836	0	0	0	0	324.6667058	260.2297576	0	0
PI(18:1/20:3)	4122.316181	5572.324067	2892.460022	3835.816732	3630.090922	6512.544699	3975.294289	3869.130552	4321.306062	1183.092233	4303.122112	7672.899179	5418.79395	3276.868069	3408.489766	1643.508733	2453.29923	1325.1096	2492.459427	4746.432117	2971.0817	2187.277102	1659.497371	1461.225074	4254.703316	2479.730504	1306.271927	2048.614281	1325.1096	3116.37552	1870.258443	2466.741076	6920.958178	4056.328916	4508.497381	3071.986395	4061.293435	3539.472627	2964.448195	1965.969294	2247.632504	2999.630608	3116.653362	3812.452011	2370.421048	3862.565592	4361.685197	3015.320989	3932.154892
PI(18:1/20:4)	7072.429055	4038.973254	1892.0219	7125.948121	3307.902168	4318.785394	7023.512735	2843.728701	4231.199636	0	4763.01663	5893.609208	10234.0278	3009.962263	4252.91779	2240.446649	2964.092939	1993.047621	2481.762668	3840.645366	2468.93133	2572.62532	3113.375946	3135.957916	11875.963	5707.103616	2523.968317	2896.449269	1993.047621	3465.426253	8872.253354	2136.056545	7312.127281	3501.865978	7832.808904	7853.821504	3265.374597	7691.890859	2037.972099	4721.062081	3216.336273	3416.966993	3795.935019	6876.922264	1828.165441	7350.465851	5404.144946	4450.312357	3052.061115
PI(18:1/20:5)	183.6400668	198.9591724	0	379.2677143	0	0	0	189.3745437	169.5487765	0	0	288.1451788	163.6789139	0	375.0507685	0	332.4597245	602.5216343	0	0	0	0	317.5842656	193.2662487	0	0	0	680.673801	602.5216343	377.0244258	0	0	248.3857479	163.9156698	0	0	0	0	285.8317701	179.7975342	0	0	214.2669964	0	0	204.5564603	0	170.6253858	496.2914667
PI(18:1/22:4)	0	2371.242021	2358.842535	0	0	0	0	1545.203413	2604.651741	0	1532.442079	1512.552941	1924.382799	1902.105569	1535.386547	0	975.496283	0	1580.766881	0	0	0	1076.790355	1039.38756	4084.343353	2099.071376	0	1625.284127	0	2492.476074	930.5377894	937.5699638	1098.721763	2598.017605	0	1512.494486	1013.505005	0	1033.844105	1028.823664	0	0	0	0	942.4131616	1925.149539	0	587.0492111	0
PI(18:1/22:5)	1049.267437	1705.165432	1572.929792	2055.68457	2084.885511	1283.790381	2147.590163	1410.480058	2019.696594	0	1393.453491	951.1881684	836.5708892	2576.582219	1591.373907	0	177.918733	1668.513809	948.2323068	987.0664729	0	0	1105.644242	1396.248274	996.5210103	954.7376681	0	0	1668.513809	1316.882437	733.4602978	0	2338.137804	1174.249195	720.8391957	947.0275232	1816.992771	821.7038699	1356.801272	1554.485353	999.3191677	350.5963066	0	2179.040066	363.5255155	1941.975462	875.5708474	478.7625634	616.4428284
PI(18:1/22:6)	0	2909.338147	1955.466244	1381.772967	1261.996944	2835.607251	1977.01691	5300.582326	1117.47326	0	1404.519291	1977.345646	1923.59967	0	0	0	2010.963254	1152.857665	2496.672979	1391.530072	2387.661863	0	1034.530621	2175.170877	2510.98055	880.6380177	0	3446.801797	1152.857665	912.5730293	1110.236997	0	1641.715704	1666.012469	2298.058199	821.0641027	2551.384519	0	672.0819839	3381.941321	1564.964223	0	1940.415569	2569.847334	1380.735487	1160.852675	1366.211001	1721.624915	2603.865038
PI(18:2/16:1)	129060.4909	229384.7747	116674.6598	253622.6802	197364.0701	163603.072	274808.7166	161569.0075	94694.85396	9886.852465	95889.11412	297437.9414	213814.4788	257516.3656	163984.4491	108208.7682	178002.656	195451.2235	235604.231	152474.7258	64519.96808	40174.77272	154384.9394	178602.3563	209263.1296	272131.0088	111793.6082	271086.1249	195451.2235	148589.3853	183804.9545	44185.65819	280733.055	228126.9351	342750.9736	97023.56485	243871.9211	221823.2592	296886.4778	205505.2467	132671.8839	37572.33642	122524.6266	269751.6891	78108.15622	222980.9022	118854.0577	213906.2663	242163.8316
PI(18:2/18:2)	694.833121	15021.77752	2951.572073	8624.380661	2904.3247	2340.288371	9555.542458	3521.538172	2278.331702	1514.55064	2495.91958	4042.355426	13297.19412	3402.069772	8448.297677	0	3326.059991	7750.721992	1325.828372	997.4435536	1273.421626	2243.407087	3238.157605	5786.334516	9839.822743	6511.587456	0	5229.939276	7750.721992	5504.188598	4755.879541	2957.287798	3382.630951	5327.32243	7989.856538	3667.685887	4458.287913	8025.404724	8947.890884	7654.996063	8282.840378	1534.050839	1308.18415	10229.12581	3302.16431	16505.56007	953.0265032	9162.543775	15520.76525
PI(18:2/18:3)	0	294.9399882	0	0	0	0	252.3776622	0	0	0	0	0	163.7011612	0	0	0	0	318.2557152	0	316.2029015	0	0	303.3862709	0	493.8397364	308.6201866	0	0	318.2557152	0	0	0	0	0	0	0	367.0516069	0	0	170.0723344	438.9420829	0	0	0	0	0	0	437.2689381	228.3718549
PI(18:2/20:1)	0	0	0	0	0	0	0	0	0	0	0	0	0	0	0	0	0	0	232.0381436	144.7716596	0	0	0	493.8369144	0	0	0	416.6971463	0	0	0	0	0	0	0	0	0	283.2253159	0	0	205.2424932	422.9976584	0	195.2418717	0	0	0	0	180.4904775
PI(18:2/20:2)	212.1338873	0	0	0	160.4981436	0	0	316.784049	338.6846197	0	0	0	0	0	0	0	361.8381659	0	0	0	0	223.1188447	0	0	0	0	0	0	0	268.1000949	320.8920151	0	311.1328128	0	0	0	190.5281823	289.8558566	0	253.2587453	0	161.3880538	0	0	0	0	246.7497428	0	205.4578023
PI(18:2/20:3)	1543.434316	2031.015562	556.6464263	756.8618257	1339.221923	2470.982917	803.616043	1227.067715	1122.194885	1356.556292	2028.305738	753.6607741	2032.251818	2657.218367	809.3920704	2353.930177	2016.96346	858.007012	1409.033765	1794.191749	952.3057832	1255.311432	2682.973844	2347.82296	473.3667135	3662.060788	1120.548952	2862.472336	858.007012	2627.832338	1778.564155	0	2463.585503	0	654.5399221	2288.014537	826.7985331	0	1282.542452	2226.365838	1150.891178	0	1123.664766	1658.293268	1039.051382	0	1406.930981	5384.751634	1862.505934
PI(18:2/20:4)	10711.70999	14609.52571	12471.8872	67732.62606	22221.53846	10620.42744	13768.61962	20046.1818	15340.82331	0	12046.78635	16980.75211	17461.34987	17146.78269	13196.4182	9731.091804	13493.35095	8569.188183	22453.19999	15481.70784	2160.830462	1400.904361	15306.57949	19183.14616	12316.81755	28970.17542	7479.295126	31647.02879	8569.188183	26878.93766	13261.44387	4146.757155	15952.23307	27535.21072	80287.83751	13124.49486	21514.03033	6020.806968	26693.08938	22435.42829	9590.093181	4774.191441	8626.351012	13763.83996	3353.055884	25554.73044	11602.82568	11080.54811	17539.19528
PI(18:2/20:5)	577.1321567	0	0	0	0	0	0	0	0	0	0	0	0	0	0	0	0	1221.847428	755.7220303	0	0	0	0	318.9001883	0	0	0	876.6259623	1221.847428	0	0	1691.537104	0	0	0	0	0	0	0	0	0	0	0	0	0	0	0	1736.047726	0
PI(18:2/22:4)	0	0	0	0	0	0	0	572.5187932	0	0	1081.115412	0	0	0	0	901.0498219	880.0582758	0	1997.069804	0	0	0	0	0	0	0	888.3302432	0	0	1401.122642	651.4596571	0	0	0	578.5082317	0	579.5492095	572.9951506	0	0	0	0	0	0	0	0	0	1745.005886	1062.038583
PI(18:2/22:5)	2445.382202	1352.295385	1074.698177	574.3948881	1057.30694	2194.214723	822.5801448	2408.790152	1790.782095	250.5084738	1578.637849	0	549.3505158	840.8920189	841.4589185	1070.739486	1819.791214	1379.228584	1223.523576	669.6404327	0	1598.009426	600.7227114	1074.963023	980.868694	626.619075	188.5106453	1462.252396	1379.228584	623.3180722	1133.954175	0	0	439.73228	0	2772.171818	668.4527612	393.1371146	1609.731393	1048.066545	589.4625035	841.0842926	0	1309.171895	762.176836	841.6138658	0	2578.709943	1776.375298
PI(18:2/22:6)	890.5178234	1162.654328	0	2418.552909	1161.813528	1537.499824	1859.542013	1922.75571	0	0	2248.942247	4378.841079	1612.798318	3110.685727	1098.411129	894.6493031	865.7352946	1723.444359	833.1717083	1390.132432	0	0	1417.768771	836.2483782	0	1138.172942	1864.767841	4027.68416	1723.444359	0	831.6923232	0	537.4389294	1501.89351	4392.211138	1366.046934	1604.228999	835.1680666	2072.092979	1364.475446	2320.805991	0	0	1099.763059	848.7998394	746.8822789	2198.308335	2616.087883	1188.456226
PI(20:0/16:1)	7259.829746	8640.507116	2648.73871	2741.064547	12793.30511	4102.2857	11522.50621	4828.039188	5791.274869	0	4350.875626	8713.28997	6045.297048	6891.980512	3548.039511	1693.241738	6730.021274	5774.178615	1327.140402	2078.879003	1434.273333	2256.286915	4167.945433	4704.220579	5757.393804	4857.232816	1619.803597	9032.349854	5774.178615	6891.35129	4619.849729	0	3910.924775	4020.310468	3275.569954	4109.961203	3577.031561	8065.910982	4996.101466	5007.290053	3237.266768	1861.663699	1401.932153	5470.416863	3550.997366	629.6605873	1953.535137	3402.472515	3729.641861
PI(20:0/18:1)	46623.99687	95037.29859	32057.24519	23215.8593	72957.55653	52285.93683	77862.06596	44543.3324	43907.88788	1474.321975	36726.46303	86820.79319	47653.70834	55151.45088	26960.67699	41304.45806	62423.76596	44238.66233	41650.6767	40033.10222	16990.73485	8211.338879	41268.76822	45693.83428	63246.43599	50076.49927	15167.9375	73550.20519	44238.66233	41294.81741	48591.80048	2601.574589	62287.4666	57706.24756	15955.15601	35643.95009	43261.58608	53692.06571	23671.1372	35215.92036	28466.31202	14799.17635	7470.085098	47041.0017	22907.54624	24830.84841	37609.22312	37690.88718	33389.3603
PI(20:0/18:2)	15400.78	20218.25641	2459.325704	12298.52773	20472.99556	9157.072464	35797.74348	8066.728871	3983.665309	0	4093.136596	19902.13183	13056.24046	10669.15908	8081.431115	4638.82739	11638.44553	14008.86744	9131.895256	6122.158382	3630.222484	3333.750301	9913.949776	13503.39811	10872.52488	12991.27229	6121.045713	23602.77637	14008.86744	6452.380692	11536.94911	1325.58801	3921.533609	8367.291097	6889.702528	9098.087568	10524.26317	26840.55549	9815.645267	5472.125219	6943.650947	4607.822064	5046.03844	12607.37995	6691.406243	7980.784595	14329.87373	7650.546363	9580.197596
PI(20:0/18:3)	868.7411894	592.0099157	582.1033115	0	0	0	1242.835958	0	0	0	0	0	0	0	0	558.2316699	0	0	0	0	0	0	0	0	0	0	0	1177.078291	0	0	0	0	537.4411849	0	858.8060783	0	0	859.4318961	0	0	0	0	0	0	583.6412066	0	0	602.4268461	0
PI(20:0/20:1)	3557.948217	5656.916951	2618.68122	1152.739358	2895.910331	7185.922904	3638.810307	3433.346153	0	0	2665.560239	5823.960544	5162.814617	2901.710579	1917.695326	0	3519.141503	1732.779537	2283.496407	1391.896626	865.733051	0	4450.396031	3458.466278	4445.472945	3892.153005	1310.135548	5882.471392	1732.779537	4205.654146	3418.83973	0	2168.833998	5091.211006	0	2044.165221	2474.234926	2230.713861	0	815.5357023	0	2872.220439	0	4398.450248	0	0	4412.333668	3479.33461	2021.161574
PI(20:0/20:2)	898.4154855	2827.278556	590.5603157	1105.499952	1611.700025	1244.769955	5342.535054	3032.194104	1147.169992	0	0	5596.451599	2336.533258	0	2491.305033	901.0498219	1736.280875	1154.507693	2791.176763	0	834.9436348	0	2259.967345	1949.670904	3470.207372	2708.985056	0	2317.84749	1154.507693	1171.666763	1110.786018	0	2131.357312	2772.067763	1134.135644	0	0	1918.075434	942.5465544	0	961.2998944	0	917.9516131	829.5748794	0	2399.219887	983.7172516	3185.586861	864.6774154
PI(20:0/20:3)	2124.443496	3213.697147	0	1387.912905	2277.974944	0	2530.989499	1971.39694	1792.825128	0	1789.851304	1372.955474	1806.922839	1419.144434	0	1230.941354	6097.35772	4393.267992	954.7208109	1679.758432	845.7462278	0	971.6501574	1858.094178	1274.598958	4262.324006	2255.316765	0	4393.267992	3899.818721	3913.964672	0	1347.853851	1182.827612	1985.461043	1466.249541	2143.302897	1412.983243	1620.183423	0	1422.068149	0	899.4538008	1947.992488	1347.055753	0	1895.445573	1638.96399	4535.738284
PI(20:0/20:4)	12727.53828	17037.49451	4457.154699	7894.377398	12657.46811	4930.783003	12912.84326	3350.703158	2803.398302	0	4847.235971	2951.327974	7827.990028	6849.69066	7074.614775	2734.915523	4859.640702	5271.039477	3692.259452	7808.535458	1328.994201	0	4129.087013	4855.82931	6780.371147	5727.879973	1802.812966	8258.271605	5271.039477	3626.958604	5882.587035	1133.973434	5689.01254	2505.442677	5858.068392	6074.853972	3833.386769	10552.91268	5890.939615	6938.388377	1853.096401	1995.11057	0	3509.620092	1530.95387	2778.807383	2014.969832	6683.6761	2702.603503
PI(20:0/20:5)	0	0	0	0	0	0	983.7172973	0	0	0	0	0	0	0	0	0	0	0	0	0	0	0	0	0	0	0	0	0	0	0	554.6514433	0	0	0	0	593.6919855	0	0	551.0482005	0	0	0	0	620.0723859	0	0	0	605.1754861	0
PI(20:0/22:5)	804.0444688	558.4842392	0	610.7153772	0	0	1863.234021	1209.569156	1086.051852	0	637.637382	0	0	911.1772143	0	0	1186.006769	0	0	0	0	0	545.2183481	2446.473524	733.808254	0	0	0	0	0	1160.233046	0	0	0	0	815.2676385	1059.60079	835.0053244	0	0	0	0	0	0	0	0	0	253.0307547	0
PI(20:0/22:6)	0	0	0	1417.838375	0	0	0	0	0	0	0	0	0	0	0	0	904.494753	577.8499305	0	665.1068306	0	0	0	0	0	802.3684701	0	0	577.8499305	0	0	0	0	1518.227278	0	1015.385415	0	969.8042443	0	0	0	0	0	0	0	0	1622.097537	625.5689602	606.7020704
PS(14:0/14:0)	0	0	0	0	0	0	0	0	0	0	0	0	0	0	0	0	0	0	0	0	0	0	853.9174415	0	0	0	0	605.6809749	0	0	1132.839916	0	0	0	0	0	0	0	0	578.6794814	0	0	0	0	0	0	0	892.8829169	1217.073988
PS(14:0/18:1)	1041.271109	871.2023222	841.5599311	0	0	846.6732765	561.3728844	512.1740979	794.4530916	835.9723326	441.3037861	175.9525329	0	0	0	1458.660615	1528.770044	3633.833287	481.8803951	0	498.3769051	0	0	194.5739312	689.6682279	0	132.8579651	834.6807674	3633.833287	0	985.6279689	0	976.4860094	0	199.3004829	878.9481082	0	0	164.5208407	769.6452381	0	548.3115109	815.4265725	0	0	0	0	5146.862628	5146.615034
PS(14:0/18:2)	1845.391831	6084.030395	849.5571663	2068.556123	3994.185089	2277.274326	2636.980361	1178.572458	1707.864258	0	2060.966316	3172.322626	851.7202474	852.6793165	2555.329908	2912.473884	2121.442175	1803.630937	3831.906674	1196.587955	582.4239551	0	2924.097264	1825.014098	2873.254104	3208.569015	0	2315.235411	1803.630937	0	3248.347294	0	4881.439834	1418.826811	4607.563061	2065.721847	1418.182752	1667.069347	8067.010728	1705.860971	1689.709494	1416.62341	2009.168708	2356.973821	882.7594609	6253.97426	5943.02404	5146.845706	8174.026862
PS(14:0/18:3)	711.802317	0	0	0	0	0	0	0	0	0	0	0	0	0	0	0	0	1181.015088	0	0	0	0	523.0224044	0	0	0	0	1195.15801	1181.015088	0	227.7636854	0	0	0	0	0	0	836.0453519	0	0	0	0	0	0	0	0	0	0	0
PS(14:0/20:1)	0	0	0	0	0	0	0	0	0	0	0	1830.956819	0	0	1077.975018	0	626.1648566	0	0	0	0	0	0	0	0	0	0	589.6494566	0	0	0	0	0	0	0	0	0	0	0	0	0	0	0	0	0	1003.492116	0	0	0
PS(14:0/20:2)	785.4783871	586.4273718	0	0	959.9765821	0	0	0	0	887.701856	0	0	0	0	0	0	1180.804749	0	0	0	0	0	0	0	0	0	0	307.1823984	0	587.6930781	0	0	0	0	0	0	0	0	0	0	0	0	0	0	0	573.7359205	0	0	293.358598
PS(14:0/20:3)	0	0	0	0	0	0	0	0	0	0	0	0	0	1375.511907	0	1393.342373	1577.29243	0	1511.518971	0	0	0	0	0	0	1012.316425	0	468.9788873	0	0	1038.992988	0	0	2067.864259	0	0	0	0	0	2061.82447	0	1543.492435	1088.265663	0	0	0	0	1177.438353	2626.471871
PS(14:0/20:4)	4372.561821	6984.523604	7273.655798	5775.838898	7203.765083	3799.326139	13100.97132	5371.769657	10186.45502	0	7158.590495	4478.361005	11572.18384	5974.167593	4114.368206	5535.838996	4182.076148	7299.096936	7338.774983	0	4047.979938	7052.422226	7971.868766	6297.099151	10223.08835	3031.768313	0	8245.684411	7299.096936	16928.84761	11043.50018	1039.031949	3014.109492	12628.94898	10194.75086	6109.941987	7177.986507	15501.66882	7964.168576	10769.03895	4124.544636	6707.32761	1553.143513	6088.909093	1402.592598	8975.572661	3949.837741	9384.755843	3655.970337
PS(14:0/20:5)	2589.187356	5732.863079	0	1013.902592	0	0	2067.959574	0	2620.645623	0	1041.64283	2073.799818	1570.66114	1049.122943	2091.750897	0	1568.332284	0	2514.03523	0	0	0	0	1549.527031	1554.048674	1720.261745	0	2097.925527	0	0	1510.575228	0	0	1566.865889	994.4016946	0	0	0	0	0	0	0	0	1041.353241	0	0	0	1051.398181	0
PS(14:0/22:4)	3145.002015	2483.41317	2584.578986	0	0	0	1550.646535	1405.211873	1953.166187	0	1557.779199	0	1540.400729	0	3617.448592	0	3136.811455	1044.518903	0	0	0	0	1762.704611	1521.616603	1555.655984	1072.725384	0	4181.227367	1044.518903	0	0	0	1516.054761	3616.168059	2949.327705	0	4116.352562	0	1732.958067	1031.088735	0	1514.723734	1526.441955	1999.828651	0	3592.178516	1030.930297	0	2611.777345
PS(14:0/22:5)	6385.739414	0	370.4237931	450.6690324	1274.206348	374.8773178	1062.496724	413.0447512	209.151467	0	442.5186455	0	396.5514707	277.3801964	411.2407301	1330.901598	1407.438214	3185.736838	662.7570992	0	261.3397841	258.2953261	133.1827688	257.9978286	0	223.0656876	0	1937.970038	3185.736838	0	221.3148362	0	156.6676768	438.5633705	0	245.4972448	254.1242976	142.6012755	0	0	0	0	0	140.2415273	0	0	285.978137	2989.751035	1967.896422
PS(14:0/22:6)	0	993.8376807	1225.340496	2218.043633	0	0	2488.871336	0	956.1817975	0	0	1198.20054	0	0	975.7251957	0	0	0	0	0	0	0	0	0	0	1029.731444	0	0	0	0	0	0	0	2956.671979	1217.747555	0	971.5639714	0	1177.065857	2442.668499	0	1453.547929	0	0	1198.432245	0	962.6531191	0	0
PS(16:0/14:0)	0	0	0	0	0	0	0	0	0	0	0	0	0	0	0	0	846.3167024	0	1468.483121	0	0	0	881.3519522	564.336507	528.696564	0	0	0	0	583.7720001	586.7984738	0	0	0	0	0	0	0	0	0	0	0	0	0	0	0	0	0	1141.204626
PS(16:0/16:0)	2385.853267	0	873.1499147	0	0	846.0730948	2247.434051	1296.428504	819.9295197	0	1308.405225	0	849.8843996	1121.748467	0	830.8161496	1190.622132	0	1181.541072	0	0	0	0	0	791.4441017	1042.459365	0	0	0	578.1671264	591.2889864	579.7197384	1005.11613	0	771.8569881	1125.338572	0	518.791015	0	0	715.9422397	547.9971032	0	0	0	550.8013452	841.882711	1783.79117	3760.128547
PS(16:0/16:1)	0	551.9501923	0	589.086841	0	0	0	590.0005458	0	0	569.046395	0	0	0	0	0	879.1963398	0	0	0	866.2056384	0	586.8448596	1465.616234	0	0	0	0	0	0	0	0	591.7169444	0	589.1506211	1182.546677	0	0	1161.58999	0	0	0	890.1489488	0	0	0	0	1696.077851	0
PS(16:0/18:0)	21061.17609	19385.15084	8719.440589	8632.684991	9762.276646	11291.46053	24919.03184	12166.93448	29679.98891	4189.078309	11024.91892	18296.26544	10842.85674	60831.25224	5708.914168	7026.984389	9431.015029	11416.33189	22369.1933	5601.050806	7303.177689	4696.440728	7794.409394	8291.990254	15543.14263	12748.19355	10455.72807	18314.39875	11416.33189	2596.151818	10002.33739	6782.376178	14719.56317	10823.04487	21012.23043	4761.884841	13605.55148	35318.974	27780.3743	43700.37018	17418.71882	4682.97894	14073.11469	10582.71716	14891.65662	6252.090832	12462.31185	11247.21207	8263.040372
PS(16:0/18:1)	2061.78292	6814.853339	0	1986.630464	5733.918064	2058.416969	5721.488456	3287.704252	3123.992683	1576.302092	5049.5792	2082.668545	2164.541013	2357.490457	2573.498576	4105.126345	2915.80846	2277.750043	2493.400896	4066.674065	1495.461825	1248.745657	3359.446427	2196.274698	3493.543093	6318.124734	3066.454103	1107.174182	2277.750043	2257.451382	0	2061.662769	3397.214045	2263.426433	2606.553581	1397.242415	7063.33208	2692.458028	1897.008373	5678.915746	1356.420282	5012.709897	1044.56526	3532.34417	1543.645625	4832.542191	1755.412495	1728.30802	2374.877215
PS(16:0/18:2)	4517.357512	2020.913073	4116.406169	3863.34692	1544.405821	992.1384966	2440.721061	2015.172679	2909.610601	2569.386967	0	2528.176791	4815.336697	1992.256746	2545.815226	2022.500703	4681.843493	1408.443091	4182.292484	0	0	1864.425883	2883.366332	1965.590658	3899.715175	1412.698621	1030.763525	3119.540907	1408.443091	0	3156.065901	1438.737587	2797.693497	1395.4065	5014.831157	1564.428288	1425.364808	2735.738434	5902.735085	1488.688286	1055.771311	1543.898043	1264.3029	4790.420875	0	2073.948887	1034.39581	2054.82379	7705.526858
PS(16:0/18:3)	1568.454127	0	0	0	0	0	0	0	846.1342107	0	536.1860878	0	0	0	0	0	0	1103.413159	0	0	555.8799785	0	0	0	0	0	0	1044.523467	1103.413159	588.1839487	0	0	879.5361796	0	0	0	0	533.2180762	0	0	0	0	0	0	0	0	0	0	1189.228653
PS(16:0/20:1)	1234.099936	0	0	0	1458.222147	987.4615789	0	2361.141169	0	0	0	2225.608521	3890.543868	0	0	0	0	1560.712397	1263.359718	0	0	0	0	907.338601	0	1734.159803	1114.644058	1030.923401	1560.712397	0	1207.421832	0	0	1457.985789	1017.676336	0	835.6389148	916.2792384	1073.627797	969.9732468	0	0	0	0	0	0	1441.066299	0	484.1764475
PS(16:0/20:2)	0	0	0	0	0	0	0	0	0	0	0	0	0	0	0	0	0	0	0	0	0	0	3059.338973	0	0	0	1215.736045	1051.937156	0	0	0	0	0	0	0	0	0	1293.668029	0	0	0	962.4366231	1162.187613	0	0	0	0	0	0
PS(16:0/20:3)	0	1879.308988	0	1381.286201	2023.19662	0	3588.127559	1037.077885	0	0	0	1558.274569	0	0	1552.308402	0	1531.272772	0	1044.825098	997.2290765	0	0	1848.74911	1002.618828	1044.856704	0	0	0	0	0	1534.78437	0	0	1970.565296	801.7312195	1043.816503	1546.218203	942.920893	1041.584215	1034.726234	1565.013424	0	1452.681066	0	0	0	0	0	1016.154623
PS(16:0/20:4)	19905.31026	22393.41444	6277.644126	8828.440325	9645.063019	6980.764456	12246.89688	7653.367889	4312.170561	1042.668722	3993.808975	9241.511273	18215.28866	9354.278388	8138.312793	2059.125096	13660.73699	3978.874964	12134.29701	7095.017845	4532.826165	3036.70398	8253.978456	2666.293132	9171.730591	13071.92962	2059.618179	8367.9963	3978.874964	9118.014173	6859.875484	1558.140611	9367.539859	7835.263791	10001.64941	3934.963685	12969.32688	11717.03708	12188.42176	12285.40061	6626.055362	2670.573654	1531.580521	7020.667865	2991.665785	1744.881217	1120.600298	14311.94844	9586.508323
PS(16:0/20:5)	2299.424888	1533.951996	1547.004161	1408.083474	1561.607368	1912.056704	1540.342237	2547.059618	0	0	1515.128958	0	1550.850832	1016.317649	2080.880675	0	0	0	1564.666906	0	0	0	1403.476334	0	0	1574.503236	917.0462738	3133.800093	0	849.5205869	0	1047.339299	0	1437.155094	1049.547316	2089.000888	1941.194769	0	1564.037974	1534.378064	2028.492316	0	0	2061.953256	0	0	0	1591.136702	1046.050829
PS(16:0/22:4)	1447.662621	2375.387021	0	2373.013887	1506.969869	0	0	0	2058.917449	1540.214017	1560.160262	0	1898.995434	0	0	935.0931006	2314.228607	0	0	0	1086.09293	0	2085.717224	0	0	0	0	2570.974673	0	2055.462899	1089.853443	0	0	0	0	822.0873318	902.8635991	1099.086702	982.0429537	2969.155699	0	1020.585033	1009.313844	1195.036584	0	0	0	4169.136619	3639.42667
PS(16:0/22:5)	1572.410621	2766.378165	1061.618256	0	1637.056443	1017.960792	1236.497498	0	1543.643951	1561.710793	1608.026741	3738.928037	1580.662904	1020.00164	1028.668846	2067.862217	1338.889322	4366.811288	943.979006	0	0	1469.182158	0	998.3759805	3050.144721	0	0	3104.273347	4366.811288	1101.403772	1947.462202	1007.380365	1452.945296	3117.543195	0	832.1528579	1525.905244	2598.282674	2512.13396	5205.818143	1602.895166	1512.190213	1016.896346	2082.956139	0	2078.732817	0	3632.013607	2574.939188
PS(16:0/22:6)	2088.763385	0	0	0	0	1200.309777	1730.512018	0	978.8107505	0	1559.360387	0	0	0	955.6830214	0	1454.322299	1895.775151	1856.290476	0	0	0	0	0	1215.638864	0	0	4351.142095	1895.775151	0	1469.759233	0	0	0	0	0	0	0	0	0	0	0	0	1270.570448	0	0	0	1543.196747	2610.977602
PS(18:0/14:0)	0	0	3087.186953	909.014524	1545.724992	2058.936443	2571.235552	0	2057.98717	0	1512.753583	0	1542.148731	3567.568353	0	1026.243752	440.7912632	4716.149042	997.4730552	1495.031514	0	996.0142911	0	1000.405459	1016.099255	0	0	2092.012451	4716.149042	996.8677669	1137.202859	0	2016.298567	0	0	3027.890146	0	0	2525.510723	2556.519629	0	0	0	3769.073521	1511.257537	987.5765758	2575.475382	0	0
PS(18:0/16:1)	1565.036637	6397.340381	6711.981148	4512.36443	4647.958853	4984.256639	7109.785372	3773.467608	18326.17158	0	7099.780362	1593.930143	2055.299366	4640.648083	1547.400721	0	3884.552184	4514.879123	1991.388691	2008.757703	2037.027026	2018.510206	5617.630999	2506.978586	7645.330923	5458.795266	2452.346165	4180.879141	4514.879123	2506.490819	1505.771843	2610.444363	4558.576659	8248.045968	2084.036618	5228.339718	2582.240188	5229.238929	2525.7086	7741.663924	2543.534615	2566.412528	1035.55881	2206.272607	3544.031223	1946.602234	0	3591.579741	0
PS(18:0/18:0)	505748.2502	1085389.14	564237.1195	238521.6633	490939.6558	742534.3188	685603.1035	471349.8473	910618.9034	24455.29102	855753.6946	449853.1611	647164.6679	1258779.626	155833.6957	366656.604	899673.1886	1240780.955	272338.4956	493164.5034	394938.6387	123336.76	608965.2015	347426.7462	746354.2021	839468.217	155850.6869	714356.5191	1240780.955	377869.8493	398322.0557	84376.98555	668098.6556	804198.3252	191407.383	437857.4507	842107.4247	443101.2045	264203.1505	1001730.712	270668.9592	478780.3656	63972.04408	805046.3289	477882.2316	233884.6811	287910.6513	619446.2363	205354.6827
PS(18:0/18:1)	53652.71646	128782.1872	62236.71784	33753.1675	78959.67015	84653.10156	120139.7814	57421.76435	102308.1096	11973.07357	84039.28669	51769.54719	116133.6553	86585.62028	37240.17898	51085.19522	98462.95861	155413.3936	39750.7343	53735.88727	30366.77713	31346.33395	82435.93676	35843.78607	89332.36607	110316.2809	23419.57801	84215.49308	155413.3936	50280.42317	77430.87541	10849.60756	71454.82092	104270.7971	22787.95354	55967.12666	101480.626	67572.7356	35477.64356	115879.5187	45977.79848	65899.4618	10419.08495	92471.23216	50929.63897	37138.76941	45732.04498	45411.54087	17468.48176
PS(18:0/18:2)	10985.02766	21065.28204	4581.980965	10045.74894	33147.21577	11920.00617	27638.13853	11212.5333	10993.39973	1040.447318	8855.166356	21755.04373	24063.08389	19313.88518	13475.53082	9118.656359	8227.928565	21691.6989	9690.107256	8296.536902	3833.589596	11207.66316	6836.278501	6166.725782	10424.51638	26143.97774	4160.088586	12655.25596	21691.6989	10197.93385	14783.88805	2584.465696	9325.619046	19003.37705	15177.34635	11869.57885	10113.08812	20824.79047	6877.466663	14494.39555	14904.08741	2585.614305	2472.009217	19218.01239	7292.338453	18832.88846	9844.829819	10758.59297	8410.249451
PS(18:0/18:3)	2224.829006	1319.843172	840.9231054	1948.67372	1116.06137	1507.236161	1524.463236	1890.592856	1983.613217	1115.573919	1625.121446	1706.719432	1621.252035	1053.487595	2155.109244	1164.039354	3007.67626	3221.246656	1608.102801	2039.13534	1103.362051	1345.881814	1633.921027	2534.052875	1409.309075	950.8171564	2218.654283	2960.69505	3221.246656	2560.766238	1290.07251	1117.925145	1365.188302	1326.007971	1823.830166	1498.650744	1091.570915	308.9910674	2062.041274	1827.247831	1184.819471	835.3379101	1916.669197	1223.235546	2401.02422	1796.971573	1619.576754	653.3801851	2372.130284
PS(18:0/20:0)	40940.52878	56631.44793	25490.44976	42428.47828	67798.62126	44863.13018	58182.54692	94223.31064	116595.68	821.1299507	60957.53749	63452.2756	51789.83869	37106.64594	17851.54879	12054.47765	58442.54919	61949.87378	34588.20799	12497.2269	26393.92089	11652.91727	35634.98116	25097.67181	40315.43577	44691.81782	6518.539402	66586.8211	61949.87378	32154.92743	23848.9947	7413.352365	47439.52149	33244.81466	19826.54456	93828.97534	45646.01208	22261.5238	61711.2088	40000.18334	17980.71748	25474.13248	15957.2388	35189.8662	14761.99488	77701.54705	22375.11057	61542.06533	28475.12683
PS(18:0/20:1)	2082.853443	14061.98484	4273.164946	1445.272427	2423.212462	5194.674459	9871.275601	5212.533523	2286.702961	0	3644.565223	4690.63582	6755.630539	2079.992513	0	1555.395379	6266.166542	2092.939009	5089.054677	7248.627236	0	0	4675.10607	1026.20683	5214.481529	7297.334075	0	7122.842058	2092.939009	2589.687768	3099.296892	1039.989034	2106.105402	3499.613682	2606.214435	1017.393448	7271.08743	3649.595112	2084.230788	3115.505744	3130.165398	2080.161115	0	2083.852223	2084.922824	1038.896588	0	2092.840407	2093.189397
PS(18:0/20:2)	1567.646574	5729.886481	0	1043.469599	5197.636512	0	2045.834164	1023.022157	1557.187725	0	1893.62768	0	3972.212887	2073.163731	2596.796524	3111.751275	6796.160244	0	0	3605.42286	1552.147201	0	2362.148924	2073.08639	2084.555528	0	0	3132.713975	0	0	0	0	1541.110492	1570.323962	0	2074.17077	1559.340174	3623.908676	0	1925.491945	0	0	0	3588.971473	2085.632337	2028.66809	0	475.2731435	2087.464963
PS(18:0/20:3)	343912.8114	416186.5249	305334.5926	473426.8994	357086.7681	368327.8199	682921.3062	815075.0009	283544.9054	198682.0667	213918.1728	369266.2542	495061.5391	407657.4886	434810.8996	179873.8837	363432.0447	363487.9279	366299.972	263006.0108	299467.6452	346098.447	399540.3482	361629.5433	353948.7474	369074.0239	280825.9951	451365.6892	363487.9279	343017.4347	371575.1422	172607.6294	811725.0292	451222.3329	448560.6903	387790.8054	242493.9183	313133.5409	516274.116	459391.7637	264605.2569	207624.9357	311669.1291	325627.6872	383868.5168	233010.4117	268634.2577	537797.1782	549292.9163
PS(18:0/20:4)	19882.05093	38180.05971	7801.652033	21605.5181	13619.01117	11976.50327	33601.31013	15827.88175	8832.718926	0	18874.67828	20055.11086	24067.05056	22882.03065	7883.982605	3524.187226	21524.23469	8763.55051	13763.13501	13018.43919	4549.192428	12518.75463	26903.85951	11004.96389	17228.83464	31755.80462	2574.976945	23875.25945	8763.55051	11409.57804	11613.70398	5742.477713	11369.28868	25459.81523	14128.98897	11962.02994	12967.71848	31061.59511	9736.48367	19778.3145	9900.707215	5791.254607	5286.106969	15100.98052	10425.02368	12857.00475	4702.01474	10872.70283	23026.8014
PS(18:0/20:5)	2758.180625	1889.121104	4625.143115	770.8717054	0	0	2662.649685	2684.87768	5935.79959	0	2397.358791	1502.616753	0	0	2174.33173	1313.907976	1304.657888	1766.158662	1492.539925	1568.305373	1223.844321	1719.526295	1140.37069	1934.539092	0	0	1894.287896	8266.084961	1766.158662	1238.634239	832.2754273	0	782.1680973	2590.24586	1715.048622	1618.034704	3204.940749	1583.495328	1551.260009	0	1019.808331	1232.245637	0	949.6240873	1880.033073	1191.07966	914.4456919	5096.186956	2302.378929
PS(18:0/22:4)	3766.806103	2081.178501	1734.077993	3872.653002	1886.296043	2781.457628	1773.836249	1544.117766	2170.181225	0	1919.364506	4734.776217	2937.989779	2302.812714	2636.403472	0	1080.506703	442.6667262	1617.131874	2058.819554	835.0213569	2108.897166	2820.582642	3712.234699	1809.363937	2723.024851	1565.456166	1122.642464	442.6667262	2146.403599	1360.967505	2104.344217	2284.803232	1299.134554	2539.941984	2290.235208	1636.517329	1108.69453	2432.591605	3340.964238	1517.255031	1002.880991	1661.981045	2455.776345	2491.979117	2097.33953	1196.059842	2022.03633	1272.116993
PS(18:0/22:5)	64608.04001	61729.1168	78849.02321	37111.8582	36373.06344	37201.82585	37032.28082	63307.00656	30913.30803	20023.31153	14348.08044	54459.77001	42965.11822	40718.88716	27758.21369	33610.00024	31371.35837	39786.42147	33758.23041	29691.4944	30399.59603	31760.29668	45096.7367	59395.79319	23379.75597	52837.11249	25679.50356	40855.07379	39786.42147	36689.19037	43171.4481	18990.5972	62776.7397	124658.2239	66158.1466	98741.05929	37831.61105	40658.91951	62078.75916	41346.00473	26268.9739	27818.6952	22753.11503	49873.68559	85834.53941	34339.90257	35053.27826	39999.7639	36233.24178
PS(18:0/22:6)	1021.689154	1564.241213	0	0	0	2056.80164	4655.933408	1030.865688	1573.31023	0	1570.274445	949.3017457	2109.842957	0	1505.166618	0	1060.020541	2188.361722	2020.210193	0	0	0	1887.587366	1009.048947	0	4205.517562	0	953.7331892	2188.361722	0	2986.381578	0	2619.258835	0	2005.25795	0	4222.601862	988.710589	0	3131.824818	3152.709463	1040.836903	0	2958.003912	0	1904.020019	0	2111.791696	957.1926231
PS(18:1/16:1)	17285.18208	8691.825992	5117.140619	6595.047658	5110.673614	980.8906599	7357.474545	11165.58091	8985.641242	5312.427023	9689.275673	1961.566139	8209.788575	4380.353057	6166.801812	4912.90017	14905.12297	5401.653486	8398.143265	3670.853	1186.018409	4613.473968	7438.763029	4958.613503	4713.749198	7239.929533	5047.535366	6103.958082	5401.653486	2162.5245	2557.948597	4280.78159	7169.248854	10455.56496	12493.46387	7940.937986	9499.728811	11085.39611	3163.680646	11591.84474	4801.191249	3359.043823	3594.327029	3827.399291	4470.167976	12324.72377	3639.108014	10220.65262	8353.824374
PS(18:1/18:1)	2821.811833	9827.71178	0	3074.683012	3519.877878	3931.484163	9803.03807	4668.829249	4461.113245	1415.609402	6624.726579	2524.044599	2982.234504	3242.042893	3645.476016	1016.528258	4702.694026	922.6316704	6205.198947	3358.748335	2692.002636	4026.139997	4537.497456	6065.322731	3209.611453	8811.923671	1023.256431	2977.131156	922.6316704	4048.66703	4732.194238	2579.408701	5102.848765	7100.262354	6350.844897	2797.8284	6754.341045	5375.220356	10193.41985	2095.301315	5014.405519	1541.261637	6198.994224	8413.361484	1046.709499	0	3428.496264	2346.877829	8648.252573
PS(18:1/18:2)	16319.25784	9137.50132	4534.41715	12659.25951	6165.947097	2373.843751	18001.14781	1750.359626	6261.27869	0	4401.724705	10664.26054	14045.48061	7200.996907	5749.664072	6678.466529	4037.937782	12296.36562	18346.35394	1256.781172	3520.562636	6363.772072	4531.825734	5252.306017	4882.077902	11067.90266	2421.745056	5862.243518	12296.36562	7547.619788	9707.552738	7210.383852	7898.745368	17565.72932	30303.93819	9456.839591	12810.9707	10636.23691	16863.02036	9496.079624	17799.24891	2499.894078	6139.760641	17808.42155	1876.227203	21427.13308	7416.119605	15632.32372	37420.45339
PS(18:1/18:3)	0	0	0	0	0	0	0	0	0	0	0	0	0	0	582.2126946	0	736.0270661	1621.677181	0	548.9353194	0	0	0	0	0	0	0	0	1621.677181	0	0	0	0	0	0	0	0	0	0	0	0	0	0	0	0	567.0857883	0	670.0944169	0
PS(18:1/20:1)	0	0	0	0	0	0	0	0	0	0	2574.052579	0	0	0	0	0	0	0	0	0	0	0	0	0	0	0	1022.375127	0	0	0	0	0	0	0	0	0	1032.848319	0	0	1513.168341	0	0	0	1026.311677	0	0	0	0	0
PS(18:1/20:2)	0	0	0	0	0	0	0	0	998.6267526	0	0	0	1449.415283	0	0	0	0	749.6591654	0	0	0	0	0	0	0	0	0	0	749.6591654	0	0	0	0	0	0	1554.15148	0	0	0	1550.775882	0	0	1555.551047	0	0	0	0	0	0
PS(18:1/20:3)	3837.596712	15655.26465	4142.65779	1551.816784	1529.405384	1048.885796	3423.218966	2439.875708	0	0	4792.765925	1564.341728	1558.224686	1805.30425	2720.798974	1554.066168	1722.889006	2064.779707	3103.97766	1016.204183	1919.940918	0	2055.449371	0	4548.191927	3075.076744	0	1290.426747	2064.779707	1547.460157	2062.274831	1539.112689	2457.705512	6004.542412	1859.874798	0	1555.970053	2425.842812	3071.879989	2989.447363	1995.60181	0	0	2075.15415	0	6253.448723	2064.926197	5032.022627	1803.592791
PS(18:1/20:4)	68408.33373	97048.34629	29187.25349	47528.36682	33245.50704	22140.09487	64633.04288	40658.53086	28037.02369	3347.104755	33709.39095	30496.00832	80820.29876	48521.29443	31698.78285	13189.66194	59850.89529	24068.41149	52974.40197	21290.56612	10112.79832	17491.83298	53299.48402	44205.01008	44215.53938	60956.51224	5384.940893	40212.10848	24068.41149	25404.6211	45342.01796	5020.654107	53369.36034	38273.31176	64822.6038	29554.94807	35520.25897	69997.59985	62268.13403	76347.94054	22273.89229	12789.93048	11924.62142	53812.80119	7925.632187	60782.13811	9865.696225	73384.73223	48350.84011
PS(18:1/20:5)	2896.217583	5210.834452	0	2467.547197	0	0	8363.918103	2077.959773	3673.68112	0	0	0	2096.640845	1536.07563	2594.579815	0	1042.460308	2058.627548	1578.488858	0	0	0	0	1555.939696	0	1548.413645	0	1047.385425	2058.627548	0	2581.559103	1041.119995	4170.56574	1679.491669	3489.791523	1050.568929	0	0	3425.466376	1433.726811	989.5957964	0	0	1563.947926	1041.347904	2085.160137	1021.757998	3453.003173	0
PS(18:1/22:4)	8819.453358	0	0	0	0	0	1544.29282	0	2545.696828	0	4633.707167	0	0	0	1004.205214	0	10487.74299	0	2998.663127	1044.420543	0	0	0	0	0	0	0	2063.865073	0	8849.64965	2573.862922	0	0	0	1174.488678	0	0	0	985.6481956	1394.707286	0	3031.106466	0	0	0	8471.516435	0	5023.949589	8823.20078
PS(18:1/22:5)	12844.77495	7820.552319	1564.674658	1310.120706	3624.684696	1011.382179	2591.462626	3646.777339	1515.518964	0	1607.952359	5195.112469	7016.147544	2634.104145	1927.617811	0	4326.724646	3647.533135	5009.312108	1044.208723	1033.604465	900.1156179	3641.543131	3777.365726	4965.949087	2494.333395	0	1352.15386	3647.533135	1007.242164	4355.50842	3121.901927	4979.653256	0	7300.601716	1828.448476	4224.513805	1384.926344	8861.21485	2727.805819	1496.900344	0	0	3634.916864	2818.594421	7390.557844	0	2834.848589	2603.52612
PS(18:1/22:6)	12004.01068	12657.81162	3622.269103	4173.227285	7327.466921	3331.770344	14423.04879	6780.652148	2237.848681	1555.936801	4171.040879	2611.811209	10037.8884	9248.369338	3240.714812	0	2289.56948	2147.641998	8202.240751	2046.330938	0	1564.091023	1205.967027	4682.923303	4358.234432	6332.895787	2103.921516	3758.955232	2147.641998	2975.357662	5518.680704	2602.03594	6397.864611	10360.77627	8074.844003	1044.831421	6631.392249	6342.23064	4480.506083	9944.370191	6969.628713	2617.426699	1569.768045	8396.830417	4383.701882	2220.302732	2612.843213	15264.69197	6296.148166
PS(18:2/16:1)	15775.46696	21227.83725	12929.46759	18122.1084	20873.78576	10817.81325	31092.53371	10482.74473	7509.078422	2021.192435	10329.14685	19597.39646	39951.7358	10108.17913	16932.81429	16332.15535	19145.18599	16087.34491	16973.74695	6661.213563	7483.627642	4297.95491	20442.53254	13169.31028	17404.10196	20206.50989	3796.508154	17579.62422	16087.34491	8133.100758	7466.736738	6207.367304	10885.38042	25813.43184	24208.15581	10509.90595	13252.32709	30740.785	19397.65387	14023.3906	11880.1068	4710.289095	8889.104456	21408.21944	10013.14828	22789.13714	14370.42695	21617.00901	24390.41189
PS(18:2/18:2)	23602.35918	34477.5938	16674.66227	47744.78124	65195.2567	20834.2888	42563.72755	22192.15893	20954.84814	3127.531583	12758.74886	46962.38454	13973.09243	16105.25027	31328.60491	19924.85379	16173.29916	30139.65411	33346.47714	15542.52235	6330.597763	9886.859728	22466.58598	29484.26866	29171.59445	32437.0727	13329.77822	13880.41251	30139.65411	26999.78319	21692.15797	15508.31145	12457.35513	17410.10674	35750.10435	35423.88037	44394.48875	37403.61405	28631.56158	29989.79183	16197.47768	4041.348198	14664.61606	49955.07183	5180.42357	22176.45323	20184.30632	47130.68526	46872.25911
PS(18:2/18:3)	625.9294737	0	0	0	0	0	1084.502831	0	0	0	0	0	0	0	0	0	0	0	0	0	0	0	1421.118329	0	0	0	0	804.7526417	0	0	0	0	0	0	0	0	955.6830214	0	0	0	0	0	0	0	1715.168815	0	0	0	587.9239351
PS(18:2/20:1)	0	0	0	0	0	0	0	0	0	0	0	0	0	0	586.4917988	0	0	0	0	0	0	0	0	743.4894209	0	605.8878033	0	0	0	0	0	0	0	655.5891741	0	0	0	562.5052836	0	0	0	0	0	0	0	0	0	0	1045.602599
PS(18:2/20:2)	0	0	0	0	0	0	0	0	0	0	0	0	0	0	0	0	591.6424778	0	0	590.0693461	0	0	0	0	0	0	0	0	0	578.410221	0	0	0	0	0	577.5550646	0	0	0	0	0	0	1173.117671	0	0	0	0	0	0
PS(18:2/20:3)	9900.181898	12511.50969	2060.641744	13534.66604	14230.50157	1578.774079	5914.705661	2591.53543	4162.409253	1049.214756	2797.671707	4493.695032	17512.13752	3234.610135	4162.041797	4663.388977	4965.91786	4149.181548	8508.870038	1263.692896	0	1442.967441	3872.398401	3248.162145	10474.97991	7319.350121	1042.501358	6153.327957	4149.181548	3362.801055	3216.274522	2774.84418	3301.882616	13066.68578	8745.835243	4453.562624	10160.27829	6632.425723	5539.823574	16739.13303	7258.726695	1460.244061	1088.822704	3127.295349	2086.192185	12640.21995	887.2319608	18410.86282	12112.35687
PS(18:2/20:4)	86657.89324	106485.8589	30842.36031	86719.8702	130818.8525	24446.18947	75033.64289	74244.39093	55242.59802	3617.275712	48335.98025	41048.96725	156961.5773	38022.29854	38461.95716	14354.86981	87728.58794	15077.63984	68974.82517	30807.39917	23502.39846	20031.70793	110936.0166	57864.89564	49301.9254	83558.73261	13270.9157	47933.39977	15077.63984	64725.97791	59904.21603	16833.44521	39535.77987	40520.01892	88081.31516	47861.69726	42120.54916	106437.5166	63066.66969	88857.29165	25123.04089	32049.52885	10875.85703	77649.92613	36503.235	88024.11033	14338.82028	46676.94778	56984.35596
PS(18:2/20:5)	1545.828634	3585.994834	0	2558.729424	3934.763379	0	6104.069544	1578.333483	3806.248273	0	1568.205668	796.8528855	0	0	0	2090.527777	2099.953574	2504.571692	2101.29211	0	0	0	0	918.8051734	0	2399.119889	1562.338378	0	2504.571692	0	1971.581786	1014.249259	3101.232464	1572.472917	2084.197091	1576.212181	0	2373.702353	2913.116687	4490.264038	1540.103293	1572.023938	1416.258353	2057.642555	2036.387527	942.8594404	2256.400459	0	2125.770875
PS(18:2/22:4)	4950.140093	7820.349017	3700.090654	3845.683543	8012.401593	2088.201566	2057.906442	5380.025302	1924.216235	0	6754.851786	2472.232669	4850.574869	4897.509558	1534.719578	2530.504617	2304.65974	1550.624787	1958.152851	2092.386986	1518.305022	1541.926955	3604.872815	2005.055579	4597.336863	4281.791629	0	1787.950322	1550.624787	0	2255.960767	1023.316632	1842.349707	4187.507964	8904.794488	5329.844367	4249.036981	8023.300818	7989.448704	3741.103482	1016.562923	4542.199873	3538.18707	3870.889441	1540.774884	6911.273403	1039.40577	6571.211684	2692.811274
PS(18:2/22:5)	7572.414261	3246.231716	2572.162739	3719.523611	9029.306332	2630.180729	7551.256926	3637.654177	5637.79369	0	4738.494634	1905.40248	5465.880747	10050.33597	2440.034066	1070.587987	3108.658135	2401.389708	5090.576038	0	0	0	0	0	3127.730252	6918.672638	2025.718907	1824.70222	2401.389708	3515.778744	4349.716877	0	6465.073007	4733.967622	8645.963302	2892.263967	4179.609246	7172.475424	10159.1099	8162.910404	2312.084882	1385.973092	7140.387198	2802.195818	2977.97822	6142.369051	0	2874.563341	2125.75785
PS(18:2/22:6)	3245.391639	5879.879121	8206.70923	7908.25846	4312.550153	4598.534197	17292.4442	10663.45418	11172.11607	1028.063051	3765.846315	6311.030345	2180.16678	11990.05364	3900.621108	1979.276205	5003.745429	3909.755887	11583.48775	3334.099035	2335.696338	0	3357.173156	1499.760628	4605.900757	5605.043364	1543.74855	10893.25447	3909.755887	5307.947901	9004.210062	3146.868318	5077.60018	5379.705079	4846.842721	4539.876388	3991.818436	8838.155285	3545.478694	12767.29049	5573.048538	1801.098478	2553.575594	5491.010712	2375.61472	6850.815244	2779.161507	2155.032515	2474.91791
PS(20:0/16:1)	32410.5956	44858.50433	19507.26885	19368.62321	56024.87905	26008.80705	22985.73042	66392.70797	93068.06622	4081.078723	26770.37805	24659.13101	31117.3402	20613.30398	10751.17323	13609.04437	47959.88567	63494.22936	13423.02125	18394.20934	20337.09955	8530.895696	29498.70736	19898.64783	53706.38607	19755.97485	3167.444218	20739.38489	63494.22936	24197.74299	24779.9047	2009.841154	31518.09152	25952.29816	27869.22482	83906.21407	36083.89548	29014.03174	62697.10332	44027.41928	40252.67797	37399.94238	7010.421336	19178.48116	10932.62263	52308.40489	28345.2433	39635.37347	16703.86482
PS(20:0/18:1)	7220.291202	7662.160141	11631.17964	7262.997317	7001.029514	3321.656608	2742.803943	5004.186706	11125.82347	0	1525.847045	5948.636204	13196.84102	10643.54419	2322.923566	3966.095982	10831.636	9193.684478	1370.923836	3009.775107	2371.748116	0	2734.667589	4002.524919	2039.61703	6940.887643	2014.840151	5445.391081	9193.684478	0	3302.382656	0	8693.434011	10188.09676	5596.560664	7940.634458	7223.152042	7577.693596	3231.667261	6032.386118	3035.881693	5093.740971	1262.010946	6383.377399	5029.957578	6654.954523	2287.691575	7914.50424	3712.587094
PS(20:0/18:2)	345638.7955	673591.4222	270317.1213	352875.8313	855452.6297	413630.4472	594823.9314	335681.6011	212841.8996	30831.03343	247292.6966	736256.0137	543481.9198	362133.9211	394709.4256	277878.4656	435441.9022	431618.0908	320856.6028	296725.9866	159067.7086	93650.49116	354850.1091	497532.2531	705223.912	401486.3149	111129.1811	497468.2939	431618.0908	364177.8696	323184.5359	73514.80847	556075.096	356305.1443	339797.246	303165.4023	477906.0843	350905.7644	349168.3861	495621.1377	303727.6132	175631.1754	119974.9229	477184.9663	143141.2919	352929.7488	281941.1979	378274.5545	446182.7183
PS(20:0/18:3)	6095.999384	27929.67054	4649.450683	4119.996416	27587.22487	8230.016459	12496.35408	9838.487419	11617.40719	585.5702093	4925.372475	8590.852212	7091.17228	3820.520369	12310.92891	3586.374108	10459.62917	8685.071132	7355.456046	4411.44198	4775.800742	2847.090961	6850.324141	10225.20998	9886.908059	7902.172138	1104.60493	43128.45121	8685.071132	4347.230102	4833.11675	2293.117335	9394.738459	1133.240359	8169.334146	23176.09985	3967.230199	12161.85073	7454.51577	7487.256314	13199.57792	1886.698128	3452.704987	8502.08344	3147.757714	8420.458247	5459.331636	5782.891095	6719.228116
PS(20:0/20:1)	0	2793.215294	3409.475323	1295.817483	1977.903493	3455.097273	2292.221505	3158.151291	1700.058257	911.6033622	3278.042901	3036.564686	3117.074751	2576.238448	588.2958036	1026.972642	1242.821112	0	2304.355255	583.4507513	0	0	4413.070927	1434.342303	2740.128119	1961.19449	1914.764181	3923.289895	0	2042.260537	881.3699091	990.7422538	1192.151015	3390.005093	1980.186671	1715.843872	2070.304125	3468.020167	2213.750228	2253.708042	975.0406391	0	834.4098489	1725.229247	1143.599931	1409.974549	903.4163168	1628.497751	1195.381243
PS(20:0/20:2)	8556.94973	11879.11554	5595.460482	4417.218788	20894.08475	5380.503994	11029.45232	8645.690505	7203.773511	1128.559612	13415.88845	8322.393332	12585.16358	6502.061043	10340.2473	6207.390105	9954.672052	13668.342	8788.757655	3181.448149	6490.654124	4308.680793	2577.06314	6937.274256	11325.405	6819.250866	1684.029016	7633.389967	13668.342	9624.629069	5973.051465	562.8901414	12975.25943	5641.619361	8199.269239	11237.3926	6562.64479	8714.025129	10134.58468	8685.610749	8720.268651	4231.991259	4352.692135	5310.956705	2089.776194	13475.27152	5201.380532	9937.635971	11670.95953
PS(20:0/20:3)	46539.05365	81873.9173	18263.69365	34657.40188	126140.8433	31458.35296	23123.09974	47612.78265	39927.45369	2260.575937	37452.65598	46101.88574	28160.41199	22033.15052	26282.00188	21881.94798	44032.16043	47066.3182	30292.99785	16846.3097	27361.77363	5321.398495	34784.0704	24836.19707	70471.37	24077.31101	10663.02501	26718.89105	47066.3182	36418.21138	19905.03179	7659.972355	65892.58078	32460.19037	35491.65211	66647.00172	35549.20667	13660.14214	54188.08995	66429.26342	19133.68069	27648.62384	15355.48459	25395.68435	10356.66021	70736.76756	31546.84259	55779.73965	44929.0038
PS(20:0/20:4)	96099.50627	135585.7657	90109.69416	89867.01629	214958.5216	85305.39195	129943.0299	130069.2949	156645.0475	4247.005844	107519.7551	95566.77093	115173.5035	193449.7237	109632.1583	47532.56874	116758.9195	94370.17438	64849.63333	62997.18388	44854.47297	34006.21779	106505.0751	80569.94663	142290.5853	107293.1272	24519.63954	143762.2647	94370.17438	98648.31161	74644.85108	20872.32766	109183.4533	103962.9982	96024.98852	125655.7371	117895.7243	109815.5479	147994.0705	172920.4795	56449.31871	65360.32596	42801.94337	87092.04084	37511.81325	137500.6271	50119.25882	121265.7829	107518.7214
PS(20:0/20:5)	4645.954864	11219.84314	1468.354852	5375.937504	11692.4665	0	17937.17902	5708.211658	11194.60022	0	5873.948685	3770.407437	1784.932732	10588.60366	0	850.1032673	2783.131667	10485.50245	3512.216931	2314.801324	584.9549343	875.0318321	0	1516.720244	4868.616587	3293.075524	0	1980.195682	10485.50245	1831.157728	1737.026111	849.5847309	5212.131933	3509.17975	5786.425861	9034.659853	2326.484454	7324.859999	6517.956782	15198.63115	2447.168632	1778.032653	1834.733206	2722.868706	1700.110217	3416.582195	2599.552355	5168.605772	3554.642816
PS(20:0/22:4)	8183.549246	6000.241646	4418.016527	4656.570903	14188.4524	3345.578384	7122.083455	8959.345948	8157.764768	0	9442.9106	4285.65045	5951.865266	8008.759893	7303.731221	1970.330249	8922.547185	3845.317866	3762.679518	2618.453944	2023.327212	2578.189818	6795.873023	4468.19353	7963.025397	5775.178646	550.2998968	3625.248256	3845.317866	8419.333493	3151.123715	746.9164733	6042.441145	4867.654135	4906.063762	10789.77192	6168.47921	4136.466637	4782.717822	8121.38891	2989.583818	3089.812245	1260.307026	7084.831612	839.0997777	8392.980998	3909.848077	9362.531782	8646.988661
PS(20:0/22:5)	3104.789364	10580.67719	3503.221295	5348.002247	16596.6381	3942.877959	14282.80901	10389.56345	10396.14661	549.9774186	7709.913525	5656.586233	8059.885274	7220.980687	10263.82141	3579.152726	16871.64278	10242.4336	3348.947693	4778.770717	6652.650483	1624.760115	5353.210542	6201.221042	14375.4677	9225.280894	3986.954222	6741.514364	10242.4336	13732.7325	2388.526833	1436.321898	13591.45141	5729.890776	9079.313554	12220.94412	5378.337799	10478.41102	14246.59766	22382.73545	6229.808249	3312.091791	6139.716927	12562.31901	3505.388528	8247.290723	4379.808431	14367.37238	10532.55391
PS(20:0/22:6)	19041.06967	38606.11505	19594.13723	7771.758352	50844.0919	24305.18524	38479.48848	20908.70871	28439.93628	1108.230673	18941.75709	33386.46595	17438.52659	18521.18354	7314.476898	17003.39562	20696.00558	22107.87601	10110.0104	8952.265786	4787.142212	3371.919418	7818.215122	16075.98138	28027.76032	15587.64566	4060.885165	38963.57794	22107.87601	13911.80507	20680.8072	2761.627055	19639.3069	16713.30026	5990.46413	13676.49791	17179.52683	16309.02346	12558.88585	23030.72232	19812.4996	9662.597248	6023.415816	21074.96004	12713.14984	8421.569609	12524.91939	15622.13859	19755.26159
27 OH cholesterol	1.49562152	0	0	0	3.400550638	0	2.579839966	0	0	0	0	0	2.361091504	7.793919862	2.037768604	0	2.161250515	0	0	0	0	0	0	0	0	0	0	2.604921181	0	0	2.522659823	0	0	2.845534217	2.007991342	2.067631597	0	0	0	4.015261692	0	0	0	0	0	0	0	0	0
Cholesterol	9971.991698	9934.233569	9952.657534	9950.712415	9963.620181	9933.446768	9965.453059	9943.557444	9904.421552	9948.011908	9941.80352	9923.795182	9940.239171	9892.161373	9957.902554	9942.328956	9945.055414	9929.256187	9969.964223	9942.920261	9946.762059	9967.059077	9972.334303	9969.774311	9901.906544	0	9919.478231	9966.079566	9953.633789	9965.667748	9966.837975	9926.424759	9935.612682	9912.830105	9950.792732	9941.492445	9964.465748	4550.736386	9958.708882	9969.170735	9944.822447	9953.676584	9925.038258	9962.225893	9929.715147	9925.802917	9932.814092	9976.708614	9962.188521
MAG 16:0	0	0	1.920113343	0	0	0	0	0	0	0	0	0	0	0	4.072482083	0	0	0	0	0	0	3.019609574	0	0	0	0	0	0	0	0	0	3.333590726	0	0	0	0	0	0	2.036087747	0	2.279083136	0	0	0	0	0	0	0	0
MAG 16:1	0	21.06862129	6.11885937	3.535984464	2.484830884	9.864523576	0.450466065	10.11357163	2.1139247	8.049821434	0	4.468808931	7.375673761	17.2952221	1.998645635	3.12758942	3.594371966	16.30032889	0	4.484062606	0	0	0	0	10.77399284	2023.06119	9.543809008	2.901016536	3.34681943	0	0	15.97697254	10.24304748	10.79294171	3.241014419	11.58189557	2.488248202	590.25717	6.318811448	2.230985025	5.692078979	0	9.974847926	6.779218368	16.36172417	2.945046048	7.196905256	0	0
MAG 18:0	1.279756157	3.948990793	10.53619303	4.266040112	1.827693979	5.717974978	8.767283184	2.479735505	6.593560682	7.788754841	3.620537296	9.205855395	3.506251586	6.163282052	0.696024873	7.656533342	0	14.08670704	5.087301009	8.100096201	5.213446414	0	0	0	9.354805876	0	14.11027766	0	4.682377141	3.299479246	2.041919432	2.761396506	3.673807648	3.608052571	1.571684559	5.951983296	6.512239111	607.339003	9.370538556	2.426440651	6.858257711	7.210366558	8.875598445	2.043718254	0	1.522074142	3.248364867	0	1.630093725
MAG 18:1	2.987615849	7.425862052	3.142395158	5.627385004	10.70880679	20.86738549	1.989285417	14.41612877	29.92704168	5.224901542	6.454390776	9.083308362	6.017374204	15.34227114	6.937750199	5.592521101	7.646930113	2.542372525	0	14.28593833	8.801451738	8.70275629	5.093852299	6.288103003	19.63101433	0	21.72457321	1.751339051	17.2413449	12.99878063	7.33073935	6.359279408	4.380067942	15.38413755	9.813369095	6.14429477	4.801401936	481.8601198	3.231451856	7.094935639	14.39252299	12.20800439	27.08606371	6.217168206	16.46137736	10.9720667	8.015503951	1.30536808	7.203876247
MAG 18:2	4.366435346	4.381903868	4.249898593	3.267820883	1.474980549	5.013518336	2.223197482	0	7.599501363	9.149046334	2.504071339	13.63432217	5.283696167	17.11465569	3.12854752	6.835299842	3.419025161	5.086711789	0	0	0	5.341871431	0	7.189979809	2.483610498	2433.706983	1.200280192	1.75930972	0	0	2.522556597	10.32151563	5.346369427	5.68392647	3.819303561	0	0.885804525	0	0	4.243198671	2.115190804	0	2.218458011	0	0	3.784689576	7.344717093	2.262967209	2.488652819
MAG 20:0	3.797592347	15.1006856	2.051464112	2.796887974	0	1.263052179	1.717535482	0	0	3.233985337	3.579249253	0	1.996482833	3.11848233	4.072224647	9.400271713	4.06994375	3.052629191	3.71072675	0	6.605632353	2.320265555	0	0	4.422393619	0	3.39542119	1.409112853	2.513379214	3.390030397	1.667666703	4.75621199	0	1.233173257	0	3.364616029	3.278698318	671.3278948	3.057311226	0.604006566	4.089406314	3.907421619	2.256221707	2.60704518	5.237726802	2.560408168	7.082427516	0.465133748	5.554992795
MAG 20:1	0	3.919713833	0.755521489	4.367336116	2.290472854	2.931699928	5.075400957	2.929836628	11.02914669	1.15547279	4.387293055	3.563216604	2.273120152	0	0	3.402332824	5.401556723	3.053205858	2.752428577	5.9772015	2.90602237	0	2.10063052	0	5.807099518	0	3.602269417	0	5.244763456	3.391809456	1.629512462	2.150340155	0	3.352164541	2.984775578	3.756732244	4.366895295	259.3913621	0	2.009021396	4.558184915	0	1.711484782	5.080210996	6.374429247	7.744838914	6.090211109	0	1.364593103
MAG 20:2	1.495161929	0	0	2.380227638	1.527397945	2.327620668	4.12391	2.080555681	2.565541707	3.057131189	2.585674376	0	2.314327175	5.191878714	3.05168305	3.455437538	2.092625177	3.281127706	2.426329487	2.990857631	0	0	0	3.915007722	1.196423042	0	6.92282126	1.682577584	0	3.39181029	3.315370236	0	0	3.339806254	4.653813752	0	0	0	2.47099526	3.012011732	0	0	0	1.701346792	3.192079359	0	0	0	4.864821781
MAG 20:3	2.989010929	5.730464082	1.723975555	4.010564415	0	2.09049392	1.213822968	2.102868826	8.869066252	0	5.322387512	3.654305365	0.699052481	9.746715668	0	1.728941456	7.46769742	0	1.364174144	5.528071038	3.710819228	3.019543228	4.75197851	3.452152965	6.580685337	0	0	1.737482428	1.793415651	2.664573513	0	3.377858662	0	1.861273749	1.838001072	5.163419121	5.169213518	0	2.398391608	3.378028364	0	5.39912252	0	1.396927652	3.594290887	3.042680097	5.683365276	0.799332526	0
MAG 20:4	2.225876006	0	3.280481367	5.8514057	0	0	0	0	0	0	0	3.480100142	0	3.505077851	0	0	0	3.426285043	0	0	7.125949793	0	0	0	4.838160386	942.5388092	0	1.536695728	0	0	2.522659787	3.957994928	5.183770873	4.912489685	3.103874266	3.153871956	0	0	0	0	0	0	0	0	2.216954775	4.491361211	0	3.262642468	1.378534819
MAG 22:0	1.351457873	0	2.124954316	0	1.799666126	0	0.638138618	2.103741063	2.244631793	0	2.557222326	9.048189262	3.535121879	6.201484078	2.034713479	0	1.548817808	5.183619149	4.94983988	0	7.425153257	3.019735441	0	0	5.349736088	0	3.470549802	1.364124653	6.252439488	0	0	0	0	2.82084105	0	0	0	0	3.050779506	0	0	2.733057905	0	0	2.287457656	0	0	3.378356213	1.389522707
MAG 22:1	0	0	0.752387304	0	0	2.447741883	0	3.153737591	5.00189732	4.234082312	7.749125301	0	2.361091349	0	0	0	6.378066812	0	3.710661785	2.988701853	8.82723953	0	0	0	7.389074316	0	2.430381191	3.642624014	0	0	1.680192688	2.253386381	5.411848739	5.509685475	3.065535836	0	0	259.4093881	0	0	0	3.990338684	2.216267177	4.234206833	3.192052695	0	0	2.294317967	1.390835333
MAG 22:2	0	0	0	6.784886633	1.526590137	3.893870171	2.579990281	0	3.35145119	1.902487333	3.852043509	3.654338789	5.583852385	7.795462552	0.487465247	0	0	0	1.901831545	4.484024788	0	0	1.948891052	0	0	823.2729371	2.353784959	3.381421014	0	2.044159707	2.465167357	2.234723435	6.132905706	3.452857396	3.288946111	2.065127642	2.67862377	516.8805665	0	0	2.279082879	0	3.801729957	2.521204192	4.162627933	1.98526121	0	1.146792745	1.797187172
MAG 22:3	1.804845787	0	0.953505851	2.349839647	3.051683944	1.043198162	0	1.706581886	3.355925652	0	0	0	0	0	2.114329444	0	0	2.56926642	0	0	0	0	0	0	4.726844397	0	3.642802915	0.754089623	0	0	0	3.377092133	6.129844105	2.846126109	2.046465477	0	1.298400295	337.5924715	0	0	0	0	0	0	4.784855385	0	0	0.463311107	2.083744766
MAG 22:4	1.481928851	0	0.901876229	0	0.783565792	2.120639526	0	3.153695719	0.624558858	0	3.873254419	0	2.401656724	0	1.986479038	1.694782746	2.161269113	0	0	5.03209265	0	0	0	0	2.950944855	1029.249533	0	1.735830879	2.474508653	0	1.593127101	0	4.092414562	2.805976701	0	0	2.312317376	0	2.84234208	0	3.120340233	0	2.206939822	2.551211511	2.419277169	1.108859727	0	0.533719159	0
MAG 22:5	0	0	0	0	3.968274718	3.893053135	3.188070284	6.260437364	2.580174048	0	2.584856567	3.302038418	2.359636605	4.76743835	2.632994961	1.685871616	0	4.469061776	1.901071543	3.208692573	0	0	3.202313706	4.187527462	0	1628.013575	3.370179881	0	2.817163188	0	3.870453625	1.732541837	7.544287726	5.683387958	0	2.014056859	1.742409591	489.9706012	3.203336359	1.815375132	2.059375771	3.990996842	5.236555965	0	0	2.534802435	4.943848612	0.457282856	5.278791229
MAG 22:6	0	0	1.632887583	0	0	0	0	0	3.357830574	2.870214279	0	5.363578421	0.926540133	0	2.037770133	1.728928758	0	2.590345132	0	0	0	3.019609504	0	0	0	0	0	0	0	0	0	0	0	0	1.991943766	0	0	0	0	0	0	0	0	0	0	0	4.26121438	0	0
S-1-P	0	0	0	0	0	0	0	0	0	0	0	0	0	0	2.344738619	0	4.322301028	0	0	0	0.184862223	0	0.433083166	0	0	0	0	1.737409312	0	0	0	0	0	0	0	0	0	0	0	0	0	0	0	0	0	7.95268471	0	0	0
Sphingosine	2.732998911	4.190189172	7.197952597	4.049206838	1.535304343	3.078459589	0	5.941665117	6.364195873	5.322194714	9.126374707	7.746756285	10.76585989	3.802736437	2.463828906	11.36253398	4.680730407	5.102152579	2.231411816	0	2.437364585	4.497532212	10.1349478	5.192917588	12.5886711	1120.156973	4.754618045	5.922479039	0	3.151608637	0	10.98233683	6.248954178	11.03752006	5.780548801	13.24392577	0	1235.235037	3.311072716	0	7.734028811	6.884107353	9.377574832	2.641848638	0	23.55230962	13.31934996	6.922161576	1.385832897
[truncated: 13 more columns]
