# Supplementary material for: Plasma Lipidomics Profiling to Identify the Biomarkers of Diagnosis and Radiotherapy Response for Advanced Non-Small-Cell Lung Cancer Patients
Source: J Lipids. 2024 Jan 27;2024:6730504. doi: 10.1155/2024/6730504 (PMC10838201; doi:10.1155/2024/6730504)
Supplement: Supplementary Materials — The original data for all analyses in this manuscript are provided in the supplementary document, according to the corresponding subgroups. The corresponding subgroups can be obtained according to the supplementary file name. [file 6730504.f1.zip › Lipid (pre-radiotherapy vs. post-radiotherapy for lung cancer patients).txt]

Sample	26	27	28	29	30	31	32	33	34	35	36	37	38	39	40	41	42	43	44	45	46	47	48	49	50	51	52	53	54	55	56	88	89	90	91	92	93	94	95	96	97	98	99	100	101	102	103	104	105
Group	pre-RT	pre-RT	pre-RT	pre-RT	pre-RT	pre-RT	pre-RT	pre-RT	pre-RT	pre-RT	pre-RT	pre-RT	pre-RT	pre-RT	pre-RT	pre-RT	pre-RT	pre-RT	pre-RT	pre-RT	pre-RT	pre-RT	pre-RT	pre-RT	pre-RT	pre-RT	pre-RT	pre-RT	pre-RT	pre-RT	pre-RT	post-RT	post-RT	post-RT	post-RT	post-RT	post-RT	post-RT	post-RT	post-RT	post-RT	post-RT	post-RT	post-RT	post-RT	post-RT	post-RT	post-RT	post-RT
FFA(14:0)	0	987229.266	1159860.658	980076.8027	941655.2389	1012161.134	1081619.04	1090417.981	1144077.289	683927.9573	2258998.576	490167.8469	1084827.854	1034921.149	1058562.24	2363404.083	0	0	430777.3224	639678.9337	468712.8666	787018.8932	97274.16233	306629.2642	853534.1738	770517.432	488948.1716	0	0	663682.9733	1266318.902	595946.5958	799922.0098	1832732.065	279640.073	1128901.702	960814.3752	354360.1945	773078.764	1003379.213	499152.4513	974904.6414	588002.783	883801.0207	992552.9066	860496.7804	977033.1473	1749475.611	2214568.412
FFA(14:1)	0	1036729.616	702191.3662	735387.5287	740293.7687	803661.2903	646399.6903	663825.4697	676663.9212	319969.3438	776155.2837	508486.9673	924767.2538	684835.9729	787978.1157	480718.3635	0	0	696123.7947	663175.8564	662152.1795	443153.3474	540333.4202	697241.4864	532365.7751	732481.3651	477316.8812	0	0	977844.246	895062.7228	1094704.097	334924.258	908028.8736	700042.979	658599.4129	535618.7917	705151.7776	511970.0412	835892.5059	575133.0902	633843.6382	745366.0168	567230.6261	764805.1373	475881.3601	1109414.245	842697.0886	852857.8649
FFA(16:0)	0	8157551.074	14996505.43	8132615.8	52589399.35	15967506.92	6196825.179	9411235.668	5147960.696	6387393.072	19725938.41	11391971.32	16112127.57	17972192.75	12681752.24	19779668.51	0	0	5331445.017	11567680.41	6902217.838	9658726.585	4936766.705	7098303.761	8089638.295	12519014.9	7794123.52	0	0	7748261.827	17164179.13	9760565.815	18350000.88	15713334.42	3263904.108	14097203.13	17650488.47	5455683.725	5909197.872	17563255.21	11507360.48	3976837.357	5188461.216	7081226.142	7194479.11	2434845.563	27606755.92	19271944.94	20843258.46
FFA(16:1)	0	270120.6257	1070427.011	471595.0224	1331064.741	1172652.464	1362795.798	1783963.315	1332751.549	409065.4891	3749633.905	1059037.701	1234129.797	1417614.603	1065961.245	2685817.94	0	0	518190.1091	1770795.346	441141.2727	1541823.303	704297.4966	1408008.655	1479573.592	1634767.021	603161.3088	0	0	1083717.942	1489311.347	824612.2092	1897199.985	2618311.947	204522.7068	1024454.285	1336917.171	533968.2756	1367731.913	2148245.775	1803287.831	110844.1254	147099.9839	755509.9842	597395.2092	149373.4151	5971841.754	2949344.597	2295049.672
FFA(16:2)	0	374236.4603	749556.737	244078.6495	630368.9936	669449.124	733350.4429	212505.3237	740295.7581	265501.4376	530007.7901	312707.656	725534.6458	739514.091	688378.049	262839.475	0	0	253040.763	381804.5754	389856.2943	344379.6827	265850.7226	257179.4494	319704.2689	362525.3642	339807.1186	0	0	247666.9559	253682.367	353192.5079	275319.965	318746.8771	158704.2921	313228.0653	91168.04808	199711.2248	355651.2217	207102.4722	309118.2871	356711.4855	168808.5484	297787.7301	320449.7134	205799.2584	305237.1876	247436.1075	393919.7765
FFA(18:0)	0	5537799.323	5781736.172	6353916.013	25074943.88	9804256.656	5320907.262	4175697.539	3673095.831	10171748.02	10297397.46	12640886.74	9651736.465	7977366.961	6878462.812	6780380.409	0	0	4905477.679	8545885.674	7657094.317	7667020.336	5270841.336	6125749.435	8570835.954	17751898.06	10748375.73	0	0	8473013.692	11443545.44	8508309.254	14810174.47	9291999.728	4436605.626	11466408.88	9005827.021	7313838.54	7598431.7	8760158.212	12916760.66	2721604.48	7515761.532	10579859.66	5462561.815	3994620.526	14950628.71	8633694.547	9223929.708
FFA(18:1)	0	15495893.8	30482530.61	15391167.74	74183584.95	34315105.3	11851420.15	20185019.52	6341031.739	16835210.88	33666249.12	36217246.42	30088485.31	39427661.31	23845537.73	25527368.02	0	0	10973436.12	31158249.19	11588577.71	22932279.92	20220873.53	24649292.71	30001155.04	38259339.52	27812828.28	0	0	18952343.76	30651039.35	28181619.28	50742382.08	31631646.72	6929136.918	35740391.5	41836731.94	14292711.73	19954127.96	36198613.05	35873167.65	5659501.808	8943245.126	28826323.54	22138819.08	4375036.066	80592365.7	29064890.67	26293838.52
FFA(18:2)	0	9735261.771	13895338	10019101.5	61491967.18	17438432.77	8196969.873	10115461.8	3380162.112	9353420.065	15532286	21729097.88	20408998.58	22001193.53	20122901.38	17487779.33	0	0	8063669.182	16250115.07	6563879.417	15493438.42	11485328.01	15158384.77	14874153.68	21126636.32	18290959.88	0	0	8900745.32	18819501.85	17331095.38	32272802.62	16193625.43	3516451.328	22432287.59	21827249.06	7584885.717	9482319.078	22449520.14	20672426.68	4210642.106	8324277.413	14067929.3	10296794.85	3415465.952	64472745.3	17832252.07	15710833.3
FFA(18:3)	0	534062.7728	526928.0543	513171.2468	8407620.974	866580.3872	823188.9262	676976.8187	214662.48	569385.9638	750006.3633	1093459.446	1106613.045	1324728.125	1760963.189	996450.5494	0	0	443310.6965	784536.5823	326174.1303	903729.3291	537914.8139	803541.5412	754375.7029	1047874.837	1041070.04	0	0	771638.5446	760785.0032	850750.6074	1226116.676	986810.4151	271961.4699	1555187.099	1051755.624	486902.022	582461.0227	1254751.021	1705288.082	268566.0856	558181.1426	528846.7534	445720.472	123901.1555	2902333.603	1412248.482	953053.4252
FFA(20:0)	0	2546677.524	1416873.578	2736114.575	1909654.306	1777739.881	2562636.956	2202389.838	3028682.108	1727484.304	1867396.497	5393311.028	2644531.179	1893201.813	2250236.735	1501382.322	0	0	439949.8541	900497.0055	1839986.556	1883807.991	1454532.85	1972671.995	1466775.908	3056615.258	1708111.625	0	0	435789.4309	1137817.642	976926.6607	3133730.241	3482030.473	2300633.607	2217816.196	1918227.301	3223948.69	2428434.062	2545933.119	2563881.115	930744.0527	3153918.155	2115806.03	1973966.918	2103444.449	2423934.659	1104642.234	934503.3445
FFA(20:1)	0	268590.8971	947698.1826	334840.1716	1789470.653	1065959.571	362888.4224	320790.4997	301837.4781	429228.9387	874088.447	1083635.253	1108834.449	833566.8906	363614.322	609213.8054	0	0	243758.5475	473805.669	168446.2355	379435.8077	452019.9174	376017.6289	665001.2012	1027865.71	1396834.691	0	0	441900.6308	770729.7706	1136651.584	1114086.087	878264.8291	149734.0486	741111.4313	1075856.782	271983.4266	318351.1265	543160.7368	918691.0782	320364.1927	246454.5017	1634312.173	382237.8198	277413.1789	3369954.844	559946.8731	463577.8201
FFA(20:2)	0	201755.1238	417747.4546	271133.6331	1448705.001	514924.581	196688.9998	250402.2683	91320.55551	369788.0546	416711.3655	627650.6353	410121.4451	496387.5456	315047.7628	244946.5065	0	0	248449.3363	379142.5015	253920.5886	379159.7356	324737.0084	382778.9244	535756.4799	716726.3867	525958.6693	0	0	273415.9539	526249.2684	675874.1089	889162.4958	466669.7918	155287.1483	537442.0947	727633.5448	270998.666	405370.5142	556822.2864	778337.6858	82762.33302	252275.1986	428397.2193	272484.5439	105726.1013	2469882.556	365896.3887	399669.3981
FFA(20:3)	0	400636.6311	433502.3652	511811.867	1000883.121	375061.7247	431389.8635	354071.5612	435062.8532	352288.3224	404957.9719	957456.095	413108.5531	466667.7884	398060.4496	407468.7885	0	0	280785.5192	692394.9433	363944.7012	491550.2262	734139.9818	774998.1186	490080.5898	889267.124	394316.3019	0	0	313531.5887	442747.3933	1685287.491	662188.3944	362220.5374	539124.3593	321420.6349	485543.8106	584759.0662	517917.5332	590448.1574	597669.4338	462588.5956	755298.0496	636666.4829	471873.5626	420277.7562	2687740.856	396351.8303	375844.1259
FFA(20:4)	0	286216.1638	571516.7991	408230.7841	2298194.949	622048.8963	454973.5321	771360.9924	352659.9558	520668.5699	1115312.663	1164199.584	843933.5128	957971.8998	449920.1066	371860.0645	0	0	603192.4842	652349.056	719190.3055	1718856.202	732308.4767	992124.8494	964553.5093	1112341.535	823846.079	0	0	850695.9677	1054584.456	2719777.05	1159634.451	954442.9079	233565.3389	817592.7493	1101707.435	243119.1266	1417885.744	1787022.196	944235.2156	350713.8782	518544.7999	968270.4391	553762.7464	266152.2887	4022545.541	971502.2386	1316612.619
FFA(20:5)	0	245807.3502	223727.4018	1414676.724	217207.782	191159.2023	201348.0039	322825.3238	218951.1539	581929.5212	325163.2884	280547.3049	166264.7705	215485.303	228533.5645	215183.6174	0	0	264106.1737	372737.1032	1877641.388	328944.437	419529.9722	447788.8627	768995.683	935375.5931	757552.8703	0	0	554267.1494	340249.7798	169628.3325	500411.0071	322711.0974	318526.6993	254453.6712	163404.5909	265705.8442	496756.2677	221879.7226	567085.0644	313255.953	614918.0672	586261.2334	198287.2031	292927.7868	216788.8256	202333.6238	131869.9085
FFA(22:4)	0	120813.6923	274484.0848	214080.203	955271.8917	282112.762	100167.7807	284404.222	87168.81298	295485.5523	379626.3088	619320.7801	260973.381	480986.6761	173243.8959	129445.1018	0	0	115887.0355	248768.3773	174054.6527	256162.5305	218031.2911	242928.0671	425010.9276	313092.2166	417035.3974	0	0	179103.1111	307691.4798	1244966.683	691361.7201	358388.2778	153779.685	478473.1796	528357.8951	197465.338	441145.767	595150.9549	536358.329	83828.99631	230187.618	390614.6282	232523.8051	90846.36735	2730071.736	260184.2227	265886.5065
FFA(22:5)	0	119474.7132	488654.6466	105460.616	1219599.58	205599.6189	372425.3139	286058.1739	190579.4896	243706.6914	320388.4578	401249.9859	260217.2395	541181.7409	125375.7613	176812.0559	0	0	213352.5124	250497.2158	142793.9851	161206.6389	199719.284	234069.4232	210962.7038	224516.6156	322367.5694	0	0	348884.3128	332900.1047	1002171.326	600437.598	355836.8705	51466.16512	388168.2445	442207.0282	157958.3166	388150.5772	672103.0173	493624.0495	123241.6827	167586.8246	260628.2284	213634.3326	91298.25156	3050917.292	269608.2856	218126.9055
FFA(22:6)	0	181143.8299	209241.9959	114431.6522	1360702.704	236863.6952	1163936.713	352931.5082	132817.7968	342790.8578	367985.9025	468463.1696	248859.0563	416879.1149	98863.17628	254989.5786	0	0	156355.7325	344994.7127	206250.8314	279619.4413	300832.1234	166682.718	295531.9555	330545.9298	358420.1191	0	0	168072.3281	448042.4614	687081.1375	532527.3686	504443.746	75633.64065	283312.5182	321031.7928	274625.3545	344995.7256	602860.3025	546100.3184	27259.64055	183288.6738	240949.2991	321446.2207	20675.4155	1327716.255	250419.2557	256595.8614
FFA(24:0)	0	15865853.4	19605826.59	7995082.123	29232515.7	3389630.66	6146509.557	20387547.24	7371918.169	1483344	32651160.66	17542793.76	11366564.95	7149391.673	11123915.57	656750.6776	0	0	3999343.576	16461535.1	24003312.62	4688410.407	33691148.52	10990625.91	17961144.3	4188302.193	11897645.78	0	0	5944274.816	11659869.39	15901240.94	5275749.753	15137050.22	3046241.502	9041591.156	331945.4159	997749.0283	4971323.098	6979997.34	1701939.814	17086436.08	3095132.662	9547286.384	3062811.333	1543686.092	1262394.636	1734759.052	13180090.71
FFA(24:1)	0	192791.7918	471048.2311	257143.1653	257841.7714	351933.5627	102518.6429	229562.2719	42377.9752	323990.9001	273007.8607	839718.8614	365258.9012	117325.2726	41599.75158	191027.675	0	0	69351.5769	132327.9651	76122.35788	279036.7266	235349.12	332383.4742	443776.6285	677903.787	1007092.577	0	0	197894.9882	205724.6566	1132531.284	435448.5981	393639.8126	532581.203	562019.0158	274604.7459	300252.392	221932.2935	165105.5591	579603.5961	152692.8018	401349.9811	1239998.147	199537.4406	115951.1137	1476302.081	120007.4803	94317.66881
LPA(14:0)	0	0	0	0	0	0	0	0	0	0	0	0	0	0	0	0	0	0	0	0	0	0	0	0	0	0	0	0	0	0	0	0	0	0	0	0	0	0	0	0	0	0	0	0	0	0	0	0	0
LPA(16:0)	1218.583677	5243.329808	1490.979943	1719.134426	2074.730118	0	1756.57505	1674.847509	2537.717687	987.221398	2326.66773	1280.266653	1556.142469	1229.896604	651.2544809	2370.252152	0	1011.954837	2845.444293	0	0	2112.233932	445.4341182	1134.626785	1332.078512	1336.981153	907.3801265	2006.979029	1011.954837	0	1618.243746	4445.065491	0	2886.831953	2624.297796	2184.271828	1494.985955	2989.470928	0	3427.067676	2365.500782	1176.333705	3078.65329	1628.424293	1357.203424	0	2536.557804	1499.217098	2148.903502
LPA(16:1)	0	0	0	0	0	0	0	0	0	0	0	0	0	0	0	0	0	0	0	0	0	0	0	0	0	0	0	495.1487392	0	0	0	0	0	0	0	0	0	0	0	0	0	0	0	0	0	0	0	0	0
LPA(18:0)	801.0189123	617.6490823	0	0	0	0	0	0	0	0	0	827.3816524	0	0	1484.589256	680.2821618	1100.672347	600.6263086	356.6076879	0	0	0	0	0	935.3607694	0	0	897.3975055	600.6263086	992.3076833	0	0	0	1234.419791	0	618.5256517	0	0	0	822.4622655	519.4497988	0	0	0	925.7632247	408.6935508	0	0	1190.586849
LPA(18:1)	631.2021495	0	0	821.3859477	547.4689404	0	0	0	0	0	411.4219262	822.0084722	0	0	0	0	0	0	0	0	0	0	0	0	0	513.5652321	0	0	0	0	0	0	0	923.922105	0	0	0	0	0	608.6228891	0	0	0	0	518.2368869	0	638.421802	364.956887	0
LPA(18:2)	0	0	434.5072972	794.0424462	0	578.7130042	652.5732682	0	0	0	0	0	0	0	0	0	0	0	0	0	0	0	0	0	0	0	0	396.2770067	0	0	0	0	0	0	495.4181133	0	0	992.0513724	0	0	0	0	0	0	0	0	0	0	0
LPA(18:3)	0	0	0	0	0	0	0	0	0	0	0	0	0	0	0	0	492.2370303	0	0	0	415.2127133	0	0	0	0	0	0	0	0	0	0	0	0	0	0	0	0	519.1821678	0	0	0	0	0	0	0	0	0	0	0
LPA(20:0)	0	0	0	0	0	0	0	0	0	0	418.1059543	0	0	0	0	0	0	0	0	0	0	0	0	0	0	0	0	0	0	0	0	0	0	0	0	313.5795	0	0	0	0	0	0	0	0	0	0	0	0	0
LPA(20:1)	0	0	0	0	0	0	0	0	0	0	0	0	0	0	0	0	0	0	0	0	0	0	0	0	0	0	0	0	0	0	0	0	0	0	0	0	0	0	0	0	0	0	0	0	0	0	0	0	0
LPA(20:2)	0	0	0	0	0	0	0	0	0	0	0	0	0	0	0	0	0	0	0	0	0	0	0	0	0	0	0	0	0	0	0	0	0	0	0	0	0	313.5878789	0	0	0	0	0	0	0	0	0	0	0
LPA(20:3)	0	0	0	0	0	0	0	0	0	0	0	0	0	0	0	0	0	0	0	0	0	0	0	0	0	0	0	0	0	355.95	0	0	0	0	0	0	0	0	0	0	0	0	0	0	0	0	0	0	0
LPA(20:4)	0	0	0	0	776.5522407	0	0	0	0	0	709.1353947	0	0	0	0	484.82758	0	396.2615373	0	0	0	0	0	0	0	0	0	0	396.2615373	0	0	0	414.5283621	0	0	0	0	0	410.4578205	0	0	405.0230564	405.3089517	519.1471845	0	0	0	0	0
LPA(20:5)	0	0	0	0	0	0	0	0	0	0	0	0	0	0	0	0	0	0	0	0	0	0	0	0	0	0	0	0	0	0	0	0	0	0	0	0	0	0	0	0	0	0	0	0	0	0	0	0	0
LPG(14:0)	333.4314307	0	0	479.0111555	345.802712	356.9214909	0	487.9766456	0	578.8690129	585.6643188	855.8922787	674.3347109	0	0	816.3331123	452.9822388	565.8279154	602.2022951	0	0	0	612.1853903	0	346.9254469	482.9246373	0	779.1338167	565.8279154	0	0	0	355.5431269	501.2349221	0	0	378.0196918	0	371.4584515	352.4176891	0	0	376.2654458	0	0	0	335.7735296	349.8805006	475.7264557
LPG(16:0)	6715.792036	2168.208936	4746.326421	970.1133349	2208.429127	1865.155107	1858.854363	665.5030378	4191.634344	1778.348166	2216.950985	1248.326499	3178.649339	4898.829864	3665.411425	6546.194167	3590.728875	7267.303552	1196.310005	1408.957135	790.8074216	3390.931495	1140.950255	2605.639569	3373.642517	620.8995317	1448.934449	2608.507578	7267.303552	831.2768411	1682.346947	1031.374205	1470.128682	1517.676093	2807.622051	1063.967077	3190.493473	1662.261678	3066.471463	2022.548036	3483.834186	1836.800515	2189.67826	721.0632989	1842.160395	843.1908013	1634.874944	3144.107908	2350.868026
LPG(16:1)	957.9292414	231.779038	549.4625004	423.6738046	489.7484279	363.5775227	322.8677356	506.7126911	209.0456198	244.1106464	883.7497596	647.1652918	215.3181962	851.5746511	0	722.521564	1192.038619	1335.318829	401.2075806	639.7703874	454.6316371	381.9469557	539.1766379	0	618.9928906	351.9617541	222.342748	0	1335.318829	257.7504665	550.9644026	0	272.7698263	391.8451236	278.8871631	424.5955937	1057.780776	628.250487	302.1589463	875.8155833	247.3571283	237.8952813	363.3525974	337.6645034	796.4460257	559.3391574	280.3249682	427.8885914	261.2279585
LPG(18:0)	3183.293057	3392.957753	1627.503088	3139.639609	5279.248979	2839.029609	3698.021904	4211.960927	3156.277982	2374.007551	5503.206869	3391.784213	5866.880648	2743.09224	5273.834779	5367.286926	4552.119347	3207.305235	2072.1818	1163.985516	2558.306757	17331.85854	2952.836453	5338.91037	6735.428197	6092.463054	2123.670084	2276.112883	3207.305235	1976.43715	4859.297194	2791.273265	3881.793114	5346.641508	4895.792599	4290.05328	9608.725024	4734.305703	3953.706228	4547.432325	4214.003669	7821.648948	7021.268708	4502.684234	3307.692353	3556.253546	2403.875294	2580.608597	3015.097591
LPG(18:1)	12396.56723	15643.59205	13013.63222	19286.87124	23815.4573	16830.19692	7881.220275	11789.65231	9206.947528	9013.783196	14015.90524	11588.61323	16929.61929	18882.34414	12346.46486	14776.4308	12984.68404	25177.10586	6331.620266	11746.44503	8232.617482	21670.69153	11969.47429	13284.01437	23981.94147	17049.78771	8652.883625	6458.475633	25177.10586	11879.72246	16084.26181	12316.24483	20366.53092	16410.46309	14693.06363	15961.28135	34354.15507	9498.329314	25204.35317	28492.11211	20439.88373	24136.0616	17302.97034	10128.4778	13688.04529	15305.29294	25958.92457	16320.10571	7806.191891
LPG(18:2)	10327.70738	3736.523794	4703.665474	9292.953783	9457.372692	6290.087287	2655.095057	5081.719366	8476.223592	6322.668817	4862.718633	5549.664325	8565.384539	3832.533522	11132.32727	12706.05708	7857.871485	11087.72182	4275.31571	6668.543035	7459.747211	10219.55411	4007.61802	4295.881774	13755.92922	6166.169466	7096.272605	4880.182351	11087.72182	3077.000766	7217.589642	5637.700969	11310.10886	10581.20896	5066.247815	9475.736783	4103.511351	4554.23377	11508.75662	9671.74927	10170.33145	10311.06888	18043.56362	3298.77871	8847.233018	6951.681525	4884.999778	5883.644395	2336.969084
LPG(18:3)	1882.060485	531.2922051	209.3022926	744.695773	747.5729899	536.9203749	429.1687088	2253.484298	338.3868649	320.2660025	576.220075	0	461.803837	641.2158504	390.9495463	449.4742464	1117.503769	746.5730708	996.6164802	1202.207289	882.1233826	385.3243584	599.7314967	2237.728427	669.3609873	0	731.9773803	906.3768091	746.5730708	866.1000322	691.4882496	801.1554739	249.4164912	1075.240643	1027.691556	646.0805555	238.5864035	546.1494094	861.9399935	489.2863446	2276.410317	1683.893817	1826.843022	485.4639752	430.4501607	409.7125589	637.2243612	559.891598	828.9951832
LPG(20:0)	539.1930841	287.2649961	200.1648861	406.4652024	493.5134539	0	288.3873574	427.6963765	221.5294298	0	575.115155	0	0	0	298.721038	0	957.3608504	445.042298	0	0	404.6897073	498.2861678	597.0850657	461.6283885	0	700.0692336	397.6900994	0	445.042298	448.156912	507.0763491	0	0	283.1624127	706.7034162	0	0	0	286.1445727	276.4567122	500.1688421	414.8802468	0	0	171.1230398	285.1664876	0	0	307.3885883
LPG(20:1)	607.9805692	0	0	0	0	0	0	1579.567941	0	0	0	1053.518547	0	1049.405121	2159.009335	521.6649449	1516.539694	301.2377304	0	0	0	0	0	0	0	0	0	606.3291508	301.2377304	0	0	0	0	0	0	0	0	0	0	1043.906255	0	0	0	0	983.2675592	0	0	0	0
LPG(20:2)	961.3391801	805.5055237	660.7140746	1474.411205	2593.741443	1078.238705	816.614338	0	909.3356761	378.9499693	1678.296317	1172.029147	1503.70298	1791.485352	1105.552664	790.6952864	409.2717933	443.3996285	935.9027603	316.1363473	552.6483166	649.97016	735.0165794	762.6043864	1398.675185	471.6061609	987.1022784	1200.041486	443.3996285	318.9647314	900.5915226	1575.182365	860.2697924	1122.949482	590.4118902	939.947037	1057.745036	0	0	1404.270105	1801.828843	1206.29178	1434.397192	1278.668617	910.8251862	1273.542997	845.9723811	0	2184.884019
LPG(20:3)	838.9390211	333.8327004	0	434.2890819	686.1459714	426.26482	628.3413066	825.9442378	1397.161488	1520.981924	934.3750344	580.743454	1467.844902	793.0695671	714.9904124	760.458729	402.3290112	907.7147822	635.7050927	173.9515052	0	1310.005305	0	0	1205.151127	366.2914035	0	390.4346726	907.7147822	341.1141724	218.6004842	505.9806914	366.8410145	835.4344636	282.4826337	844.6500961	508.2525383	0	973.9891433	245.9429002	594.340261	810.9383602	763.4683892	0	791.9640738	0	625.8953736	268.5212019	291.546461
LPG(20:4)	645.0895122	1038.099245	430.3196355	645.7521265	652.7003753	0	247.3348856	241.2722594	343.8755217	0	0	242.721116	327.7923607	434.8821425	514.2681623	322.6205119	0	1035.957535	0	496.8495654	0	929.9819187	0	405.3148969	0	319.5149998	0	848.8038309	1035.957535	0	184.9097142	513.3991934	611.537038	365.8114215	453.9143147	675.6236462	774.244489	0	609.4478422	1100.108338	1113.920679	826.2025499	627.8665199	713.2215847	1365.631947	320.6003931	354.6000639	450.8271552	782.567232
LPG(20:5)	1005.193156	790.4445021	188.8871792	500.7881459	526.4222867	253.0528833	454.8662302	626.2755636	362.3035205	0	742.2808838	471.6336645	331.0147881	440.3755674	340.6860418	1162.854822	793.6151601	529.9773698	190.8130344	0	292.049673	0	715.4588832	839.1768959	387.7961985	253.0733316	797.0771031	445.1880434	529.9773698	422.2840175	936.9813271	0	0	320.407622	490.9134501	805.2282497	634.0106911	571.4524172	658.5345042	0	481.8755806	329.333832	591.3200117	642.721316	435.3787761	713.2799188	622.4886979	692.4439228	0
LPG(22:4)	504.7649379	369.1134957	259.0973249	305.895357	353.2480327	524.9308746	417.8649176	680.1217917	522.4680221	0	0	295.5006208	528.4543859	394.7081541	321.378915	257.4325577	908.7734571	779.8106074	464.9485965	266.4002285	475.0252559	499.8085893	0	539.1676985	531.718581	379.1599585	560.0775682	527.9312876	779.8106074	343.8506369	431.5621512	918.4372512	0	532.5020209	580.6272795	472.5643249	0	222.5000302	406.4704757	748.2461468	320.2738422	383.3872182	620.8093658	547.1264717	872.9329774	211.5448531	456.449808	1364.613929	284.6242086
LPG(22:5)	621.5459223	996.1441059	921.0195624	741.8336965	1312.678935	828.6352518	636.6206998	1534.328434	1015.291077	0	631.8826771	1527.002402	827.0250611	574.785353	1399.659648	657.4404359	0	0	361.4974382	288.8479975	287.6766071	446.4132872	620.1703925	657.9820641	479.0834901	477.1540082	0	0	0	401.1396309	740.9943212	285.5792261	0	709.3656685	1331.529964	368.0999959	1294.47663	0	801.5450858	911.4132431	752.2510853	664.829931	1650.388364	522.8336846	620.7270756	669.3847401	378.1668308	553.4169061	288.4840104
LPG(22:6)	621.9055824	602.1930444	500.2657914	363.538378	829.4104015	496.0484388	469.856287	585.3980179	502.9463936	0	480.4639668	781.3804931	824.2081545	0	727.8310022	794.7478727	0	0	0	0	709.2606879	511.0803394	0	364.0935092	517.043123	0	481.1441913	1158.881481	0	134.3115579	443.6492326	584.6850452	0	0	582.6507276	512.8731467	775.6149044	622.6765531	637.1857019	380.3789931	2192.238391	0	595.6567452	0	647.0384836	515.5999839	606.3908515	350.9216861	0
LPI(14:0)	0	0	0	0	0	0	0	0	0	0	0	0	0	0	0	0	0	0	0	0	0	0	0	0	0	0	0	0	0	0	0	0	0	0	0	0	0	0	0	0	0	0	0	0	0	0	0	0	0
LPI(16:0)	1636.504279	0	0	0	0	0	0	0	0	0	1190.402964	0	0	0	0	888.4125317	0	2021.054318	0	0	0	0	0	0	0	0	0	1181.269411	2021.054318	0	0	0	0	0	0	0	0	0	0	0	0	0	0	0	0	0	0	730.1783446	884.2537106
LPI(16:1)	0	0	0	322.8966904	0	0	0	0	0	0	0	0	0	0	0	0	0	0	0	0	0	0	0	0	0	0	0	541.3435555	0	0	0	0	0	0	0	0	0	0	0	0	0	0	0	0	0	0	0	0	0
LPI(18:0)	0	0	0	0	0	0	0	0	0	0	0	0	0	0	0	0	0	0	0	0	0	0	0	0	0	0	0	0	0	0	0	702.7269086	0	0	0	0	0	0	0	0	0	0	0	0	0	0	0	0	0
LPI(18:1)	0	0	0	0	0	0	0	0	0	0	0	0	0	0	0	0	0	594.5744833	0	0	0	0	0	0	0	328.9608081	0	0	594.5744833	0	0	0	0	0	0	0	499.7782283	0	0	0	0	0	0	0	0	0	0	683.4546378	1028.877307
LPI(18:2)	837.8383111	0	0	0	0	0	0	0	0	0	0	0	0	956.9366625	0	0	502.7118999	501.7012826	0	0	0	0	0	0	0	0	0	0	501.7012826	0	0	0	0	0	0	0	0	0	0	0	0	0	0	0	0	0	0	0	706.9645423
LPI(18:3)	0	0	0	0	0	0	0	0	0	0	0	0	0	0	0	0	0	396.0669053	0	0	0	0	0	0	0	0	0	0	396.0669053	0	0	0	0	0	0	0	0	0	0	0	0	0	0	0	0	0	0	0	0
LPI(20:0)	0	0	0	0	0	0	0	0	0	0	0	0	0	0	0	0	0	0	0	0	0	0	0	0	0	0	0	0	0	0	0	0	0	0	0	0	0	0	0	0	0	0	0	0	409.1944214	0	0	0	0
LPI(20:1)	618.469155	0	0	0	0	0	0	0	0	0	0	0	0	0	0	0	0	0	0	0	0	0	0	0	0	0	0	0	0	0	0	0	0	0	0	0	0	0	0	0	0	0	405.1539801	0	0	0	0	0	0
LPI(20:2)	0	0	0	0	0	0	0	0	0	0	0	0	0	0	0	0	306.6824899	0	0	0	0	0	0	0	0	0	0	0	0	0	0	0	0	0	0	0	0	0	0	0	0	0	0	0	0	0	0	0	0
LPI(20:3)	0	0	0	0	0	0	0	0	0	0	0	0	0	0	0	0	0	0	0	0	0	0	0	0	0	0	0	0	0	0	0	0	0	0	0	0	0	0	0	0	0	0	0	0	0	0	392.3600142	0	0
LPI(20:4)	505.308203	0	0	0	0	0	0	0	0	0	0	0	0	0	0	358.1394552	0	277.9896609	0	0	0	0	0	0	0	0	0	0	277.9896609	0	0	0	0	0	0	0	0	0	0	0	0	0	0	0	0	0	0	0	0
LPI(20:5)	613.5703688	0	0	0	0	0	0	0	0	0	0	0	0	0	0	0	0	613.546762	0	0	0	0	0	0	0	0	0	0	613.546762	0	0	574.5707202	0	0	0	0	0	0	0	0	0	0	0	0	0	0	0	0	0
LPI(22:4)	387.209428	0	0	0	0	0	0	0	0	0	0	0	0	0	0	0	0	0	0	0	0	0	0	0	0	0	0	0	0	0	0	0	0	0	0	0	0	0	0	0	0	0	0	0	0	0	0	0	0
LPI(22:5)	0	0	0	0	0	0	0	0	0	0	0	0	0	574.0103902	0	0	0	0	0	0	0	0	0	0	0	0	0	704.6600959	0	408.8642981	0	0	0	0	0	0	0	0	0	0	0	0	0	0	0	0	0	0	0
LPI(22:6)	0	0	0	0	0	0	0	0	0	0	0	0	0	0	0	0	0	0	0	0	0	0	0	0	0	0	0	0	0	0	0	0	0	0	0	0	0	0	0	0	0	0	0	0	0	0	0	0	0
LPS(14:0)	0	0	584.8156109	0	0	0	0	0	0	0	0	0	0	0	0	0	602.4873378	500.5213018	0	0	0	0	0	0	0	0	0	600.2641974	500.5213018	0	0	0	0	0	0	0	0	0	0	0	0	0	0	0	0	0	394.8201352	0	0
LPS(16:0)	1042.117002	2458.807711	826.8604516	1615.152741	2904.809519	1918.637084	2572.128511	963.8801149	1743.205907	1142.087562	2270.461309	2505.618212	1844.877708	3490.396478	1483.299027	2274.725278	0	512.2162433	1760.396347	0	1237.114326	2574.721737	567.2826705	1850.799687	1229.532481	2128.991152	1572.695376	995.1893063	512.2162433	1386.530313	1751.328868	3028.291119	965.7712875	1705.361574	2640.381727	2462.690446	2104.933064	3490.051495	0	2796.540646	2920.977481	790.4292148	2227.243361	1046.614898	2205.783433	1099.915282	2572.462986	2728.911694	1756.306533
LPS(16:1)	0	0	0	0	0	0	0	0	0	0	0	0	0	0	0	0	0	0	0	0	0	0	0	0	0	0	0	0	0	0	0	0	0	0	0	0	0	0	0	0	0	0	0	0	0	0	0	0	0
LPS(18:0)	1317.346642	723.0689803	0	727.4697683	1327.367605	0	1067.669855	0	0	0	837.2341863	1359.302071	878.0773705	0	883.7069783	687.1468255	1005.510294	0	991.9926313	0	0	0	0	0	525.5998829	0	627.3110836	1358.228836	0	512.2261039	0	586.36074	0	1247.015468	0	0	1039.036175	0	0	0	433.3213284	519.4173885	1044.559808	314.2749489	0	0	972.0802274	930.404091	586.6862523
LPS(18:1)	488.728252	0	0	0	0	0	0	0	0	0	0	812.0746304	0	0	0	0	669.0566141	858.0743311	0	0	406.7729409	0	0	0	0	0	0	384.7960303	858.0743311	0	0	0	0	0	0	0	912.7166254	404.5157552	0	0	0	0	0	0	0	0	0	0	0
LPS(18:2)	0	0	0	0	0	0	0	0	480.4538259	0	915.3527616	0	0	0	1193.507923	0	0	345.0422678	0	0	0	0	0	362.7626509	0	0	0	0	345.0422678	0	547.9054235	0	0	0	0	0	549.2341875	1645.032511	0	915.5349571	0	0	1190.486599	0	0	0	1533.081025	0	1147.214813
LPS(18:3)	0	0	0	0	0	0	0	0	0	0	0	0	0	0	0	0	0	0	0	0	0	0	0	0	0	0	0	0	0	0	0	0	0	0	0	0	0	0	0	0	0	361.8625507	0	0	458.3084994	0	0	0	479.8555735
LPS(20:0)	0	0	0	0	0	0	0	0	0	0	0	0	0	0	0	0	0	0	0	0	0	0	0	0	0	0	387.4773308	0	0	0	0	0	0	0	0	0	0	0	0	0	0	0	0	0	0	0	0	0	0
LPS(20:1)	0	0	0	0	0	0	0	0	0	0	0	0	0	0	0	0	0	0	0	0	0	0	0	0	0	0	0	0	0	0	0	0	0	0	0	0	0	0	0	0	0	0	0	0	0	0	0	0	0
LPS(20:2)	0	0	0	0	0	0	0	0	0	0	0	0	0	0	0	0	0	0	0	0	0	0	0	0	0	0	0	0	0	0	0	0	0	0	0	0	0	0	0	0	0	0	0	0	0	0	0	0	0
LPS(20:3)	0	0	0	0	0	0	0	0	0	0	0	0	0	0	0	0	0	406.6201362	0	0	0	0	0	0	0	0	0	0	406.6201362	0	0	0	0	0	0	0	0	0	0	0	0	0	0	0	0	0	0	0	0
LPS(20:4)	0	0	0	0	0	0	0	0	0	0	0	0	0	0	0	0	0	0	0	0	0	0	0	0	0	0	0	0	0	0	0	0	0	0	0	0	0	0	0	0	0	0	460.7010204	0	0	0	0	0	0
LPS(20:5)	305.6606421	0	0	0	0	0	0	0	0	0	0	0	0	0	0	0	307.6391323	0	0	0	0	0	0	0	0	0	0	0	0	0	0	0	0	0	0	0	0	0	0	0	314.8581128	0	0	0	0	0	0	0	0
LPS(22:4)	0	423.8004545	0	0	0	0	0	0	0	0	0	317.293209	0	0	0	0	0	0	0	0	0	0	0	0	0	0	0	0	0	0	0	0	0	0	0	0	0	0	314.198	0	0	0	0	0	0	0	0	0	0
LPS(22:5)	0	0	0	0	0	0	0	0	0	0	0	0	0	0	0	0	0	0	0	0	0	0	0	0	0	0	0	406.6399996	0	0	0	0	0	0	0	0	0	0	0	0	0	0	0	0	0	0	0	0	0
LPS(22:6)	0	0	0	0	0	0	0	0	0	0	0	0	0	0	0	0	0	0	0	0	0	0	0	0	0	0	0	0	0	0	0	0	0	0	0	0	0	0	0	0	0	0	0	0	0	0	0	0	0
PA(14:0/14:0)	0	0	0	0	0	0	0	1049.371016	0	0	0	0	0	0	0	0	0	0	0	1012.955995	0	0	0	0	0	0	0	0	0	0	0	0	0	1526.441278	0	0	0	0	0	0	0	0	0	0	0	1010.168657	0	0	0
PA(14:0/18:1)	0	0	0	1049.529878	1048.805054	0	1049.428993	0	0	0	0	0	0	0	0	1518.573589	0	0	1000.676802	996.0398637	0	0	0	0	1513.160038	0	0	0	0	0	0	0	0	0	0	1045.043642	0	0	0	988.3549266	1027.983877	0	0	0	0	0	1048.824539	0	0
PA(14:0/18:2)	0	356.6174146	0	947.0069292	0	0	0	0	954.9149642	0	0	0	0	707.3034014	0	0	0	0	0	174.5041187	0	0	0	0	0	0	0	0	0	341.1264619	0	0	0	562.5258616	0	530.9928738	1007.5678	0	0	0	0	0	0	0	0	0	0	0	481.4231881
PA(14:0/18:3)	0	477.7270385	0	997.0305896	0	0	222.2301729	443.3849034	0	0	0	0	539.3231056	0	0	0	0	0	0	0	0	0	0	412.5189989	333.7811598	0	0	0	0	0	0	321.94989	0	0	0	0	0	0	0	247.2386985	0	361.0360413	229.7021801	434.938213	370.5654014	0	0	0	0
PA(14:0/20:1)	0	0	256.6847035	0	0	0	0	383.2706657	0	0	0	0	367.9514529	0	0	1047.401736	0	0	0	1128.724831	0	0	0	0	0	0	0	0	0	878.5187626	0	0	0	0	0	0	0	377.1816468	0	0	0	234.1259402	0	0	0	0	0	333.4086045	562.7242364
PA(14:0/20:2)	0	1052.751404	0	0	0	0	0	0	0	0	0	0	0	0	0	0	1083.394961	0	0	0	0	0	0	0	0	0	0	0	0	0	1034.26308	0	0	0	0	0	0	0	0	0	0	0	0	0	0	0	0	0	0
PA(14:0/20:3)	0	0	0	0	0	0	0	0	0	0	1580.825186	0	0	0	1049.522527	0	0	0	0	0	0	0	0	0	0	0	0	1566.454147	0	0	0	0	0	937.8471335	0	0	0	0	0	0	0	0	0	0	0	0	1049.346877	0	0
PA(14:0/20:4)	0	0	0	0	0	0	0	1447.633388	0	0	0	0	0	0	0	0	2444.020338	0	0	0	0	0	0	0	0	0	0	1048.268036	0	0	0	0	0	0	1579.398377	0	0	0	1045.976253	0	0	0	1044.973362	0	0	0	0	0	0
PA(14:0/20:5)	0	562.5928475	0	0	0	374.9746531	0	0	0	0	0	0	0	1462.088885	0	0	0	0	0	0	0	726.9446334	0	0	881.8220353	0	0	1118.823442	0	0	0	0	0	0	0	0	0	0	0	0	0	0	0	0	1578.580305	477.7479549	0	318.385395	580.173907
PA(14:0/22:4)	0	0	0	0	807.4888203	0	0	1053.241431	0	0	0	0	0	0	0	0	0	0	0	1401.911642	1430.650619	0	0	0	1051.592725	0	0	0	0	1051.958371	0	0	0	1036.166524	0	0	0	892.4038665	0	0	1556.106468	0	0	0	0	0	0	0	0
PA(14:0/22:5)	0	383.2852137	0	0	0	0	556.2021968	0	361.0500859	0	0	0	0	260.2442958	357.3976084	0	0	0	0	0	0	208.1206879	0	0	0	0	0	0	0	216.443496	0	0	0	0	0	1506.080003	0	0	0	0	0	0	0	0	600.4838799	0	0	0	247.0226135
PA(14:0/22:6)	0	0	0	0	0	0	0	0	0	0	0	0	0	0	0	0	0	1027.483842	0	0	0	973.2847311	0	0	0	0	0	1567.64402	1027.483842	0	0	0	0	0	0	0	0	1053.522899	0	0	0	0	0	0	0	0	0	0	0
PA(16:0/14:0)	0	0	0	0	0	0	0	0	0	0	0	0	0	0	0	0	1568.866945	0	0	0	0	0	0	0	0	0	0	0	0	0	0	987.5945817	0	0	0	0	0	0	0	0	0	0	0	0	0	0	0	0	0
PA(16:0/16:0)	0	0	0	0	1530.091687	0	0	0	0	0	1559.504873	0	967.9882684	0	1009.27045	0	1750.76792	2095.884823	0	1052.380485	0	0	0	0	0	1730.484271	0	2801.493679	2095.884823	0	1746.138451	1002.194032	1286.630595	0	0	0	0	0	0	1269.365792	0	0	0	0	2051.548139	0	999.3602218	1003.592805	3017.84372
PA(16:0/16:1)	1830.576422	0	1001.282546	0	0	0	0	0	0	0	0	0	971.3219237	0	0	981.5800678	0	0	0	0	0	0	0	0	0	0	0	1044.760088	0	0	0	0	0	0	0	0	0	0	0	0	0	0	0	0	0	0	0	0	0
PA(16:0/18:0)	0	0	0	0	0	0	0	0	0	0	0	0	0	1447.981276	0	1029.427585	1480.555784	0	1056.691567	1041.033464	0	0	0	0	0	0	0	0	0	0	0	0	0	0	0	0	0	0	0	0	0	0	0	1009.704412	0	0	0	0	930.7869612
PA(16:0/18:1)	1979.354668	0	0	0	0	0	0	0	0	0	2327.065085	3998.51595	1433.88613	0	0	0	0	0	1771.829926	1473.880805	0	1459.911088	872.891401	2020.797209	854.5207965	0	863.6466158	0	0	1476.719282	0	9646.351398	0	992.5320637	4383.594912	9806.553303	0	3454.341901	0	834.3864234	4020.799338	1056.58469	1440.251772	2020.604605	0	0	9264.686548	0	0
PA(16:0/18:2)	1047.380748	1008.325432	0	0	1049.410987	1043.149333	1009.364025	0	1566.933423	0	0	1518.218878	0	1529.573887	1548.726845	1471.344919	980.3454447	2673.057706	0	0	0	0	0	0	1516.844903	0	1009.856178	1268.731092	2673.057706	0	0	0	0	0	1551.913481	942.2403587	1047.414821	1527.210334	1041.730337	0	0	0	0	0	1564.517714	0	0	0	1515.959693
PA(16:0/18:3)	0	0	0	0	0	0	0	0	0	0	0	0	0	0	0	0	0	0	0	0	0	0	0	1576.057132	1286.857371	0	0	1086.200955	0	0	0	0	0	0	0	0	0	0	0	0	0	0	1055.90788	1072.156513	1574.422001	0	0	0	0
PA(16:0/20:1)	0	1472.808089	374.9730475	0	0	421.5070175	0	0	0	0	0	0	0	0	0	0	0	0	0	0	0	0	0	0	0	0	0	1085.178133	0	0	0	0	0	0	0	0	0	0	0	0	0	0	0	0	0	0	0	0	0
PA(16:0/20:2)	1592.976202	0	0	0	0	0	0	1578.333505	0	0	0	0	0	0	0	1030.875036	0	0	0	0	0	975.602682	0	0	0	0	0	0	0	1050.045613	0	0	0	0	0	0	0	0	0	2042.279871	0	0	0	0	0	0	0	0	0
PA(16:0/20:3)	0	0	0	0	0	0	0	0	0	0	0	0	0	0	0	1047.260035	0	0	0	0	0	0	0	0	0	0	0	0	0	0	0	0	0	0	0	0	0	0	0	0	0	0	0	0	1047.278737	0	0	0	0
PA(16:0/20:4)	0	0	829.3508473	1507.212323	0	0	707.1434413	0	0	0	755.3089028	0	1675.622151	936.3722568	868.8550547	1030.132308	0	0	0	1031.155524	0	0	0	0	1045.684344	1577.730238	0	0	0	1050.787894	0	0	0	0	1054.10551	0	0	0	0	0	1018.95569	0	1419.451817	0	1035.23242	0	0	0	0
PA(16:0/20:5)	0	0	0	0	0	0	0	0	0	1040.950374	0	0	0	0	0	0	1624.722234	0	0	0	0	0	0	0	0	0	0	0	0	0	0	0	0	0	0	0	1019.950409	0	0	1053.259437	0	0	1001.355347	0	0	0	0	1039.655804	1544.484767
PA(16:0/22:4)	0	0	0	0	0	0	0	0	0	0	0	0	0	0	0	1519.482699	1042.251913	0	0	0	0	0	0	0	949.4793683	0	0	1046.217561	0	0	0	0	0	0	0	0	0	0	1054.213511	1196.522324	0	0	0	0	855.6357307	0	0	0	0
PA(16:0/22:5)	0	0	0	0	0	0	0	0	0	0	0	0	0	0	1003.948918	0	0	0	0	1518.674655	0	0	0	0	0	0	0	0	0	1055.812852	0	912.2598844	0	0	0	0	0	0	0	1042.980198	0	0	0	0	0	0	0	0	0
PA(16:0/22:6)	0	2035.94492	0	0	0	0	2596.48272	0	1037.45828	0	0	0	0	1037.488165	0	0	0	0	0	0	0	0	0	0	0	0	1041.759713	1065.431957	0	0	1048.137447	1572.868432	0	0	0	0	0	0	0	0	0	0	0	1053.938413	0	0	0	0	0
PA(18:0/14:0)	444.3706304	0	748.1126784	0	0	0	0	0	1175.072346	0	0	0	0	0	0	0	695.4787726	0	0	0	0	0	0	0	1051.559706	0	0	0	0	0	0	0	0	0	0	0	0	0	0	0	0	0	0	0	0	0	0	0	0
PA(18:0/16:1)	1647.833063	6097.758224	2252.882008	2579.414544	2271.115328	1538.749378	2565.945257	5124.971508	2040.599962	0	3569.510277	1788.54717	3591.848456	2529.384512	1001.183844	2668.277558	5231.6444	1024.597458	0	2490.571356	0	0	7019.554242	2004.789309	2017.520549	8596.615602	1517.574274	1579.862057	1024.597458	2480.293437	3483.780943	1540.106836	1010.271441	2532.071526	5063.67498	2020.310091	5937.858499	5566.617704	3028.995903	3508.102364	5383.703907	3136.065275	1518.368699	2524.927703	2077.276642	2526.079218	1533.356787	477.1716753	1518.033297
PA(18:0/18:0)	2651.703913	7065.855457	3980.517132	1436.57869	4110.002427	0	3856.572973	2317.135604	1659.175821	0	2502.818233	4152.298598	4631.850379	1542.571274	2522.658271	0	1545.723139	1046.290508	3990.844441	3487.800719	0	1994.369684	5035.314914	1400.361252	3043.676291	2022.702123	1020.049281	2090.8404	1046.290508	1484.110015	3824.108138	1926.485253	0	2529.632795	5054.094922	5214.476293	1303.98703	3498.477369	0	1368.46304	4098.21848	2286.45248	1977.797912	2544.498349	1428.718679	1561.380792	2065.400239	1485.609803	2056.625083
PA(18:0/18:1)	119427.9594	226153.8166	76395.04532	95714.63179	126708.0488	67053.87824	126281.1113	101780.1146	76036.55412	16904.90074	78713.17716	88484.60285	188027.125	75360.06688	64582.29607	55295.01809	113609.6296	51840.77599	82861.88725	49404.47909	35819.23903	38642.04421	154173.1368	75723.63748	127272.6495	194332.2349	32134.02305	75748.97169	51840.77599	52109.39012	88938.47658	72927.79732	51762.03767	111740.8111	180692.3147	126467.2931	140900.0001	198661.1543	55167.8497	107055.4694	180089.1795	92792.56911	130726.7914	45470.82578	76642.43948	108143.3418	77379.20649	59037.69493	74208.54931
PA(18:0/18:2)	142168.9126	338615.58	86575.13798	161816.9181	177835.2738	90520.28778	204336.2507	60764.91405	126324.1726	60426.70363	39685.49285	171602.0025	138075.8417	102352.2499	215057.443	97800.23104	73220.83883	233473.317	255448.8974	57715.12114	101901.1068	105287.5433	106545.9585	113619.3952	306471.2868	248615.5618	77522.72736	79126.40969	233473.317	101473.5291	162645.3982	185993.9549	71444.03167	271085.8233	295618.6188	150967.4624	237023.4952	486398.124	109568.8114	144833.062	470277.0672	99191.44111	546572.0448	46985.09706	139520.5808	278753.648	146895.0577	111424.0297	244178.588
PA(18:0/18:3)	1467.894293	3063.759732	1543.77019	1013.917374	0	0	4120.337736	1520.38965	0	0	0	2525.446627	1491.503858	1543.116926	4114.745051	1030.132308	3137.759762	3140.279713	5490.476721	1495.096067	1565.848753	996.9230904	1513.899498	3851.702174	0	5063.625248	1027.983877	4195.580522	3140.279713	994.9642926	0	1004.60036	0	4041.905208	2502.250684	3530.542288	2020.783138	3527.946016	1028.063097	0	7593.547538	0	8614.981137	0	4485.386253	3605.98837	0	0	1542.637142
PA(18:0/20:0)	2611.925672	10746.25762	1540.181905	2568.271881	2416.975515	5176.006675	2669.568713	2529.255131	1928.88412	0	3049.560561	1604.024451	1522.717324	2585.255396	932.0338235	2951.890255	3656.933722	5006.070986	2067.373696	2551.923729	0	2034.819235	1011.090855	1000.08821	2400.923557	4435.13314	2064.0203	4314.937195	5006.070986	1362.880883	2011.302976	0	1027.737329	2667.861773	921.287111	1689.651032	2981.03287	3014.422452	1529.484025	3937.1275	7180.474778	5018.518363	5924.684258	1529.920947	923.7783944	1529.035664	1037.159087	3561.677518	0
PA(18:0/20:1)	4735.288494	9421.323741	2576.913725	3535.055501	7078.685646	5167.957683	1033.000806	6671.806621	0	0	1526.987639	2053.546805	7226.106208	3055.240231	0	1791.074214	2614.280266	1567.769865	4529.052607	1006.028382	1006.223032	1013.449962	7663.338523	5580.783599	5654.065206	4627.665315	2589.41651	2520.861733	1567.769865	1001.797066	2410.758124	1551.627553	1022.578285	4888.126548	2544.887524	3571.614863	3522.330579	3527.882546	3060.294763	2528.013725	2557.586604	2423.198636	3061.202082	2384.317869	2541.970428	1033.278509	2587.163749	1028.922676	2564.516632
PA(18:0/20:2)	2661.913698	9760.263187	2585.014462	2017.955206	6724.074199	1029.993618	6048.813393	1563.227327	0	2570.315302	0	3071.905123	0	4130.255953	1439.092315	2543.560683	3136.046026	4698.248944	11050.83291	0	3552.82743	1684.668723	2537.150035	0	5122.212532	3558.896798	0	1593.471214	4698.248944	1997.981242	2424.271991	4647.884313	3091.633969	3013.153058	5234.076035	1868.946595	4213.057507	7657.855019	0	1283.206607	9707.30127	4064.411075	2318.79736	0	4807.752184	3560.461289	1033.474838	2056.309081	1886.67139
PA(18:0/20:3)	53866.23042	142254.2838	34202.92626	53641.56739	56918.72422	34710.7101	67834.84304	40364.97589	34963.02674	12442.79037	26144.93722	46822.22029	98921.27345	51757.37303	52325.07117	25253.1798	55041.06474	39707.31977	54354.12107	21161.58744	33722.97488	21987.46988	57569.1587	29942.8521	98561.57739	70835.19611	12847.58852	27662.82307	39707.31977	31377.38699	64264.94894	52863.23709	18152.66397	69450.78088	100353.9197	62349.0782	63644.19366	125192.2955	33473.35274	56892.87163	99657.01127	53664.49543	83723.72077	18579.98957	36563.12611	75917.28466	30762.4618	27310.64089	60670.61146
PA(18:0/20:4)	839429.7973	1621038.135	381206.2336	531038.8116	778014.5708	343924.4246	784621.2018	678875.882	469777.2702	126750.8472	460143.1008	642130.8063	1453060.361	600744.9273	498063.4113	249292.0391	788038.0967	366840.4729	673186.2615	321127.6731	331517.4688	297317.1287	883664.761	474194.726	761246.7618	1063105.655	144185.4044	466321.226	366840.4729	376056.2458	620062.9997	544854.0557	163792.1632	568061.261	941778.0706	793151.3108	634421.1254	1085085.376	268517.36	633694.941	979168.5806	644133.4578	601149.8399	204271.3591	381666.0378	637964.1742	363223.0815	236001.5942	669324.3663
PA(18:0/20:5)	11454.81138	28643.9934	1554.119929	8810.291455	4098.80204	4672.641964	34253.4624	6232.882957	13483.59084	1562.058723	10869.03449	9321.232946	6750.452062	19427.2041	5184.832277	5163.434819	4162.743425	22921.77857	17964.63035	2047.863034	4871.037064	0	6200.079538	2582.295975	9760.794258	9362.260727	2083.172794	5213.85252	22921.77857	4106.578701	9712.822	23552.46647	0	7241.381007	14567.43934	8846.126987	8294.051394	14039.97255	2605.311618	7261.684548	57248.10286	4670.147075	10243.24539	2602.405688	16424.35517	2083.466921	10152.56965	6193.051074	8991.156262
PA(18:0/22:4)	196274.7157	406356.4478	142324.6717	227061.5751	297131.9291	75811.90458	85846.1655	297480.7959	90786.69792	19080.02711	215436.2319	153231.7574	488231.9836	104338.6358	137121.7759	62515.29976	320954.1286	37039.87247	107457.1391	84333.18655	63841.64496	52137.07679	345391.3218	132287.3412	111024.5977	327768.5993	15434.04748	65627.72922	37039.87247	103534.3531	122920.0793	86805.95693	37213.44633	127007.5907	401481.2344	306563.0055	164329.3002	235160.2093	67662.15452	109227.682	204336.3147	257832.8598	96774.41436	59340.13992	78803.35737	194799.4831	83625.32735	71440.34579	170107.3521
PA(18:0/22:5)	125785.2855	221752.236	39981.96884	93249.19658	123218.3995	51726.48415	110492.8784	90333.73705	68807.60342	19255.60637	65603.85211	74507.59111	209934.7232	93048.77585	119409.312	44741.64849	120086.8599	79814.47175	87822.69094	29861.4126	48421.94104	35436.61971	144294.396	74850.52047	82370.85188	188456.9581	32288.60696	62636.47336	79814.47175	68102.70676	72797.26716	82762.05241	21885.79551	84505.80914	188551.5816	114396.2459	98117.10347	159001.4123	44718.3595	122398.462	193104.1942	82143.07005	104565.6954	21068.2817	81815.5253	54888.71967	83403.6915	48035.64118	79324.32292
PA(18:0/22:6)	75513.10785	117990.194	50911.48993	40494.29215	64993.72045	49935.58042	111569.2206	46692.54334	52879.76529	10949.98325	47244.63137	67731.71245	76759.57109	72859.46693	44720.91821	40540.64674	48752.11326	62701.59809	81335.94702	39454.24152	25947.58924	19755.17128	45705.9918	54862.43632	61064.56387	78663.06919	23462.40668	65480.94941	62701.59809	28367.99406	56961.44803	61821.53653	14477.93365	57964.0677	62792.20518	60913.78614	83883.36556	109374.6713	12467.31396	90046.71077	116030.8853	56810.35058	63703.55244	36500.99449	69774.31707	15117.73335	60008.6378	33141.90914	51543.82744
PA(18:1/16:1)	1676.027553	0	0	0	2080.522359	0	1026.685963	0	0	1922.44097	1032.159009	0	1543.142283	0	0	0	0	0	0	0	0	0	0	0	0	0	0	0	0	0	0	0	0	1065.705651	0	1542.738849	0	0	0	0	0	0	0	0	1036.717785	0	0	0	0
PA(18:1/18:1)	2539.357673	1568.081245	1030.248872	988.4767389	1468.113585	0	1565.300589	0	2054.502121	0	1038.616597	2021.828562	0	3594.85079	999.3678351	0	3114.212247	0	1850.667207	0	1026.544164	0	1556.474923	2732.331093	1121.161441	1513.910618	0	0	0	0	657.1755087	1549.421389	1505.947449	0	3530.155966	0	943.2870495	1513.42934	2023.923858	3035.663432	1420.647285	0	5792.688677	0	1514.817957	0	1543.492429	1885.971369	0
PA(18:1/18:2)	1585.222819	3145.854006	1026.687441	1512.503617	0	1542.643507	1308.047867	1006.97763	2571.09752	0	0	0	3048.1779	5142.600382	2520.384979	958.7072516	0	1635.394331	2457.320792	1997.753134	0	1015.177375	0	0	0	2527.594167	0	2623.059003	1635.394331	0	2498.27852	0	0	0	3158.477993	0	1010.584442	2526.034685	0	5064.001325	4562.097685	0	4508.022475	0	2525.894543	2018.374777	1547.31452	0	1007.970309
PA(18:1/18:3)	0	0	0	0	0	0	0	0	0	0	0	0	382.2106276	0	0	0	0	0	0	0	0	0	0	0	0	0	0	1045.228302	0	0	0	0	0	1036.166524	0	0	0	0	0	0	0	0	0	0	0	0	0	0	0
PA(18:1/20:1)	0	0	0	0	0	0	0	0	0	0	1498.763306	0	0	0	0	1039.875425	0	0	0	0	0	0	0	0	0	0	0	0	0	0	0	0	0	1012.848651	0	0	1041.885431	0	0	0	0	0	1043.569186	952.316509	0	0	0	0	0
PA(18:1/20:2)	0	0	0	0	0	0	0	0	0	0	0	0	0	0	0	0	0	0	0	0	0	0	0	0	0	0	0	0	0	0	0	1565.421767	0	0	1568.46134	0	0	1052.751404	0	0	0	0	0	0	0	0	0	0	0
PA(18:1/20:3)	0	0	0	0	0	0	1037.259431	0	1573.459548	0	0	1036.352653	0	0	0	0	1081.165825	1047.567451	0	1537.198422	0	0	0	0	1022.694453	0	0	0	1047.567451	1056.318723	1038.992988	2570.487002	0	0	0	1052.528344	0	1043.683456	0	0	1016.739033	1513.388705	0	0	0	0	0	0	0
PA(18:1/20:4)	9671.38631	8816.665334	1552.374625	4154.092319	2074.467465	2076.588789	3108.737208	3117.297671	5696.604496	1561.000068	3627.867232	6760.507314	3819.103615	4276.948538	0	2586.087539	2611.051155	2087.26909	7193.743343	0	2072.606582	0	1542.005269	0	5213.183523	2083.940973	3124.953506	0	2087.26909	1534.576717	7702.525212	3117.082478	0	2054.940873	4546.546366	3236.349957	4446.55771	6092.718279	1564.080591	9288.759179	9370.979956	7774.453745	2992.993885	3125.442668	7797.393154	0	4161.382362	1913.152268	9167.560728
PA(18:1/20:5)	0	0	0	0	0	0	1559.031474	0	0	0	0	0	0	0	0	0	0	0	1057.946092	0	1033.617545	0	992.0100818	0	0	0	1512.105455	1083.955477	0	0	0	0	0	0	0	0	0	0	0	1013.79659	0	0	0	0	1044.913838	0	0	0	0
PA(18:1/22:4)	3131.752425	2067.05128	0	2038.404226	0	0	0	0	0	0	0	1564.179911	1556.43662	0	0	0	1070.672737	0	1548.806009	0	0	0	1039.437164	0	1019.67331	1030.215247	0	1030.919486	0	2063.615831	0	0	0	0	0	0	1563.029906	0	0	0	1561.589741	0	0	0	0	941.7771353	0	0	1032.867758
PA(18:1/22:5)	1051.454702	0	0	0	0	0	0	1036.564919	4153.859122	0	0	0	0	1038.368449	0	0	0	0	0	0	0	0	0	0	0	0	0	1294.32141	0	1502.457211	0	0	0	0	1563.791588	1053.327138	0	1017.255724	0	0	0	0	0	0	1527.486866	0	0	0	1547.201573
PA(18:1/22:6)	1525.16685	0	1041.018031	0	0	0	1038.886861	943.4320889	3634.740642	0	0	0	0	0	0	987.5766199	0	0	0	0	0	0	0	0	1042.875315	3127.505478	0	0	0	0	0	3135.951515	0	0	1040.91138	0	0	1573.335681	0	3104.675597	2592.496609	0	0	0	2605.686589	0	1425.768261	0	502.1369879
PA(18:2/16:1)	0	0	0	0	0	259.125123	0	0	390.2900317	0	0	662.1507538	0	0	868.8660218	0	1601.447026	0	0	417.9791064	0	0	668.1517684	1051.471473	0	0	0	0	0	0	0	0	0	0	811.0118588	0	0	0	0	0	0	0	0	0	0	0	0	0	0
PA(18:2/18:2)	1093.236893	1536.58788	0	0	0	0	1036.604295	0	0	0	0	0	0	0	0	0	0	0	0	0	1041.630501	0	0	0	0	0	0	0	0	0	0	0	0	0	0	0	1042.962192	0	0	0	0	0	0	0	1008.844383	0	0	0	0
PA(18:2/18:3)	0	0	0	0	0	0	0	0	0	0	0	0	1464.34168	0	0	0	1085.236548	0	0	0	0	0	0	0	1037.336223	0	0	0	0	0	0	0	0	0	0	0	0	0	0	0	0	0	1027.091792	0	0	0	0	1008.048063	0
PA(18:2/20:1)	0	0	0	0	0	965.2975426	0	0	0	0	0	0	0	0	0	0	0	0	0	0	0	0	0	0	0	0	0	0	0	0	0	0	0	0	0	0	0	0	0	0	0	0	0	0	0	0	0	0	0
PA(18:2/20:2)	0	0	0	0	0	0	0	0	0	0	0	1198.20054	0	0	0	0	0	0	1531.134422	0	0	0	1013.191328	0	0	0	0	0	0	0	0	0	0	0	0	0	0	0	0	1719.292068	0	0	1088.150622	0	0	0	958.9015309	0	0
PA(18:2/20:3)	0	1064.701174	0	0	0	0	0	1020.083415	0	0	0	0	0	0	0	0	0	1018.645793	1027.756551	0	0	0	0	0	0	0	0	0	1018.645793	0	0	0	0	0	0	0	0	0	0	0	0	0	0	0	0	0	1020.296915	0	1572.423653
PA(18:2/20:4)	4704.068056	0	0	0	0	1374.320958	0	0	0	0	1039.883409	0	1550.353561	1030.124695	0	0	0	519.8085156	1023.551043	0	0	1030.090801	1511.293999	0	0	1561.417266	0	0	519.8085156	0	766.2761224	0	0	1537.037392	0	0	2074.747004	0	0	1555.379587	2206.87572	1036.564874	0	0	0	1014.001172	0	498.3505887	459.2910148
PA(18:2/20:5)	287.359233	0	0	0	0	1047.13043	0	0	0	0	0	0	0	1042.334458	0	549.3467724	0	397.9510064	0	1004.257932	0	0	0	0	0	0	0	0	397.9510064	0	0	2096.649758	0	1009.856716	0	0	1042.962192	0	0	0	0	1563.624984	0	0	0	0	0	0	0
PA(18:2/22:4)	0	0	0	0	0	0	0	0	0	0	0	0	0	0	0	0	2087.864444	0	0	0	0	0	1589.19429	0	0	0	0	1042.140173	0	0	0	0	0	1044.867388	0	0	0	0	0	0	1548.411324	0	0	0	0	0	0	0	1033.717738
PA(18:2/22:5)	0	0	0	0	0	0	0	0	0	0	0	0	0	0	0	1030.011535	0	0	1014.748398	1025.311407	0	0	0	0	0	0	0	0	0	0	0	0	0	0	0	0	0	0	0	0	0	0	0	0	0	0	0	0	0
PA(18:2/22:6)	0	0	0	0	1438.836272	0	0	0	0	0	0	0	0	2015.03998	1039.255616	0	0	1057.399501	0	1041.033464	0	0	0	0	0	0	0	0	1057.399501	1010.396983	0	0	0	0	0	0	0	0	0	0	1563.649358	0	0	0	0	0	0	0	0
PA(20:0/16:1)	3140.255259	14705.24623	4082.753746	8572.209238	8069.055395	1546.944031	4694.832022	16942.83633	2495.392902	1531.884599	11659.17474	5554.11849	12517.52024	4642.420884	3090.233141	1918.306329	15165.27846	2091.398921	2936.577182	2806.491014	3519.550617	2519.366339	7371.146526	6743.747424	16858.55497	13086.70204	0	1046.165264	2091.398921	3493.518919	2510.18038	0	1003.161649	8057.24727	8723.161368	9747.355642	11624.00404	19201.95847	2889.984396	6763.441754	11192.89471	10580.73412	6551.892405	6384.025697	1493.435552	4802.86642	2581.501044	9757.710517	5120.775206
PA(20:0/18:1)	88520.86969	180452.6737	74818.50632	144347.8989	87970.29499	59676.57333	121116.6882	67564.19655	75063.31253	10825.89799	61059.95793	82401.83624	128846.6817	60234.47752	94303.10231	31991.33734	79854.44782	58458.50522	136689.4854	35780.74902	30946.73517	42973.09176	106106.428	59624.70885	117593.2415	171390.6325	20921.90981	37979.74946	58458.50522	49565.42432	75592.41276	89328.93711	23758.63575	109962.8677	148024.8403	109602.6751	158935.7414	196712.4986	22940.1982	123310.4198	161961.0906	94452.02158	134845.8435	34594.1152	41331.72584	63489.44802	49403.39503	54687.29366	66125.43748
PA(20:0/18:2)	254175.2386	515576.4815	156843.7035	392498.7782	263234.0453	162597.0817	410970.2323	118257.6284	224585.0954	69918.04396	72234.42164	343313.789	248039.3242	184449.2987	277295.3184	206186.9683	122070.7311	317940.7189	338545.5113	96137.74025	149128.3938	170498.1977	196554.6182	157906.1887	452152.7394	430880.6519	124195.5658	139602.0706	317940.7189	191120.7465	209900.1034	240720.7992	84854.16256	522515.8431	470574.3004	288739.4707	429038.368	876424.8944	125517.6306	288999.7361	800503.9252	224414.5632	726430.1486	78949.23189	199667.9353	315581.8408	302193.7408	155051.8879	320527.0426
PA(20:0/18:3)	2193.824468	7229.140975	0	6290.091712	2663.776135	1032.351479	4501.569365	3601.98251	1547.679007	1039.251404	0	5445.563902	3424.061311	2064.705684	4486.300354	0	1564.860234	4115.835625	7876.57223	3836.768466	1030.128146	0	2792.008365	3916.793631	2066.605065	9997.778961	2033.515261	7745.466853	4115.835625	2453.648703	2045.885648	3043.380265	1039.164124	3767.03898	10280.69679	3119.069015	4585.154111	6259.368425	1030.273	1852.590477	10037.76882	1997.743096	5224.426562	4127.45576	2033.445423	8128.60316	2802.53814	0	3090.354829
PA(20:0/20:1)	942.9484244	10271.10208	1554.878665	3565.81158	3629.656025	4649.547999	2208.091949	0	1036.915789	0	0	2603.103801	3754.695905	0	1510.691002	0	2082.84725	2082.505094	2030.885499	0	0	1539.235313	1517.860309	0	3771.966786	4633.829955	938.4352827	1604.464006	2082.505094	1016.414959	1035.480949	1345.151527	0	2729.121333	2049.59575	0	3311.45983	0	2840.819251	923.2252556	4123.878263	1952.8135	1531.2122	1560.940326	1554.070276	2038.210301	5675.056505	0	2061.141869
PA(20:0/20:2)	3116.140937	2833.513685	0	3713.210156	3695.20532	2596.596677	1906.130596	1563.02088	2070.19298	0	2192.055882	4290.277934	1211.082237	0	5168.999858	0	4438.884196	4004.945321	2346.794517	1534.179849	3061.807889	0	4497.763781	1008.821583	1968.987321	6783.322966	2082.88927	1694.814058	4004.945321	2561.456949	2218.76808	1958.484731	1239.645396	5875.482433	2368.252731	1551.037531	3633.796371	9172.418395	1029.434757	3548.385288	9363.600347	5205.4892	4509.686466	2075.838943	1528.303187	1541.301957	2464.965917	0	3961.54517
PA(20:0/20:3)	98610.1686	193777.6727	34157.50126	77496.57493	75760.36774	56657.02043	93398.1131	70328.52303	64243.23256	11588.58998	57735.48741	83361.33191	112186.4682	84919.64256	60553.86789	33975.52086	80345.06188	66684.02437	84974.64252	31514.62561	40433.39966	39849.65152	92662.07829	45667.82808	129403.1256	104164.4962	15077.44876	58767.78012	66684.02437	50419.19991	78094.07885	94502.46334	9762.946517	114805.8316	134891.8286	104726.2477	131754.0835	179391.8632	21854.58007	135979.7688	187257.1457	100027.2283	113551.8788	27691.01898	44539.96929	72217.85378	41460.13285	24557.30216	93668.57562
PA(20:0/20:4)	1304835.996	2795821.544	817687.4954	1126315.078	1048526.055	520096.429	1235071.231	1129287.815	920077.7372	161911.406	824103.5663	1068064.796	2170243.475	1037930.929	810334.2582	360825.7288	1129489.976	499311.9982	1048379.114	487397.7169	449531.3082	499784.8031	1485590.695	962349.4863	1228103.295	1968093.105	234662.8495	802776.5005	499311.9982	706915.6657	1233499.986	838187.4613	236888.3356	1209949.464	1609688.439	1361746.154	1047029.896	1871425.471	334593.7616	1453153.707	1688908.052	1274341.082	903915.5797	466551.5504	496195.2774	791422.2614	524233.8904	291179.7108	1294487.963
PA(20:0/20:5)	37057.99754	69776.73062	5958.174983	37499.85417	11961.5617	8803.507897	78532.21083	19050.28131	28549.03558	3628.777416	16669.18404	27109.03397	21607.25217	48922.34646	10896.98641	20309.72522	9967.086892	35507.3687	39907.88889	8057.540617	13011.30791	3763.707627	17062.32914	8813.738648	11654.6455	37444.95327	10151.76509	15809.58159	35507.3687	14016.39244	15011.36206	46630.37366	1541.784119	39095.27543	26981.07537	25017.70093	20331.2675	36056.38398	6262.413631	41180.84172	110577.2199	17284.18965	17549.96984	6785.470498	24471.35468	12231.49987	37586.40244	9825.207666	30645.14017
PA(20:0/22:4)	223508.2474	447420.5253	158095.5125	193355.0946	224662.3671	81292.55061	61392.48185	303073.1851	70299.12952	14826.88499	173076.2415	146499.0844	517897.063	55206.31449	127157.9638	30504.60674	248782.9161	25302.64102	100216.3951	88473.10902	58861.12565	36926.02279	365719.0585	165071.4738	128305.7628	345233.4286	26626.82765	78963.9047	25302.64102	109128.8087	148012.9676	54157.21371	33939.57019	168717.3148	406243.512	326289.9911	130191.5874	208556.087	27150.20551	76049.41896	157099.7417	242874.6634	65687.57837	78719.67868	44425.35957	118212.5427	40643.08211	36743.92714	153823.9158
PA(20:0/22:5)	146372.5551	213654.8455	38042.6145	106287.1156	106717.0382	35004.39797	102988.6644	50488.59454	62188.12022	16178.19449	60413.42658	90859.91511	233716.9732	60009.91499	81837.53924	19630.77775	114220.7959	57845.46263	85380.9675	40812.03339	32248.52807	31523.48224	141414.4137	72366.30328	70644.31277	209039.4355	18252.83084	48408.4612	57845.46263	63637.31832	94407.14049	64749.15205	12911.25015	70327.54031	194302.974	116755.3694	79045.90396	121119.3755	14510.98054	93354.33063	128251.8701	65264.72206	81957.07657	54286.16552	56023.32089	41166.01477	40987.37839	39657.609	76883.34965
PA(20:0/22:6)	83979.82748	185789.1343	49740.85158	54362.78464	60037.72466	50716.24918	171601.019	64330.47952	67250.36839	8565.230188	50936.95633	72994.82556	109148.1278	86109.5844	36365.56664	44252.60425	62396.35526	70131.07451	98121.63042	29303.53934	42168.88868	14557.16158	61686.84262	63912.82676	67282.98242	134503.8578	28128.83509	79757.96695	70131.07451	41462.55499	84087.66049	56348.94143	14603.46804	82204.5277	69815.57911	68634.17171	90372.45475	172129.6666	10180.23388	130077.4617	204110.0775	81929.12652	72605.96757	42966.52047	65068.9767	17512.65032	53924.67382	33639.67631	59687.4984
PG(14:0/14:0)	0	0	851.5443888	0	0	0	0	0	0	0	0	0	423.353375	329.4879414	0	0	0	552.8947269	394.4195961	269.3610023	0	0	0	0	0	0	0	328.5036372	552.8947269	0	0	425.2019428	611.7967841	0	0	0	962.0353004	0	0	0	0	0	0	0	0	0	0	1130.862848	0
PG(14:0/18:1)	2279.8728	550.7651047	797.6064751	898.6936134	879.4386283	749.9289724	1064.37815	1100.056681	1258.358038	0	836.6914918	881.813023	1062.35313	1820.67703	0	0	837.2307349	2813.299786	675.6002525	0	834.0242868	404.4220437	282.2100205	1376.506229	1387.492801	274.7480498	0	1420.955536	2813.299786	548.9358981	1899.051129	394.9163998	0	1188.742496	646.7450906	560.9181686	1600.603927	1666.294994	0	2458.054063	1431.827061	961.5265619	649.3494523	415.5720261	1699.691228	420.5923099	1576.381549	1852.640575	1101.782425
PG(14:0/18:2)	1604.734198	847.388164	0	1102.961544	514.3230879	0	368.9072175	697.2798186	902.6355866	391.5143136	553.625	675.0344466	1044.752084	633.1578564	479.6221726	786.5369009	1199.020055	1514.022076	1527.835067	390.1085534	660.2420141	771.8539959	984.3996417	544.8721773	1577.944363	2090.482788	691.801323	1274.574594	1514.022076	0	899.3274641	1034.531858	553.4708531	2635.263098	1527.142981	507.7837018	1103.446198	1461.137495	276.8350444	699.3773049	2225.616814	1114.801313	2209.627724	275.531231	691.4818907	827.5189307	767.0509524	659.4143117	900.4959756
PG(14:0/18:3)	0	0	0	0	0	0	0	529.0196435	510.82549	544.1701383	0	0	0	0	0	0	0	494.6218608	269.3835064	422.5658554	406.1098591	0	274.3095111	517.7412016	0	0	403.1135191	0	494.6218608	344.6918084	0	0	0	0	0	0	401.7285982	0	0	0	505.5601207	0	0	0	0	0	0	0	0
PG(14:0/20:1)	0	0	0	0	0	368.0362357	0	0	0	0	0	0	370.2862976	0	0	0	0	806.1200693	0	583.3098547	0	278.0920213	320.3562415	0	0	0	0	0	806.1200693	0	0	609.3003262	0	660.077293	0	0	0	0	0	0	494.9311	0	0	0	0	0	490.3081079	0	0
PG(14:0/20:2)	0	831.2806164	0	260.6099826	910.812292	0	0	273.194148	0	0	0	0	0	0	0	0	397.7366233	0	0	415.5164037	0	0	0	267.6654324	0	0	0	0	0	0	0	0	0	0	957.4756033	0	407.2346501	0	0	274.4807121	276.4966434	387.6068513	0	275.4387493	278.4442002	0	493.1685701	0	656.7360698
PG(14:0/20:3)	0	418.3227282	0	260.0878302	534.5965873	0	535.4727559	421.3785756	0	0	0	278.9019758	383.7062588	0	0	381.0405078	0	1301.457677	382.5221615	0	0	0	408.2031544	544.3049863	419.2209745	421.6656787	0	0	1301.457677	0	0	0	0	523.8508815	546.117545	558.4909781	0	0	423.511585	0	708.365016	0	277.0003075	280.1005151	415.2032862	0	535.9964471	535.6276479	0
PG(14:0/20:4)	1630.422225	4013.661457	1012.936769	1390.506862	622.0505386	758.5407871	2250.092507	1107.0559	1220.182132	280.0689819	833.6400556	1973.967883	2763.999239	1746.117216	1525.873065	0	1960.266696	684.5820611	1738.579025	0	263.700375	1087.256487	767.3218735	1673.333492	1372.810912	1264.735384	421.8836473	465.2646486	684.5820611	1642.318083	2797.76549	592.9445436	529.1655057	3675.84556	1704.603508	1526.762504	549.6468797	1373.790599	0	876.4350368	1689.077023	1028.692763	962.2204029	419.2176735	1117.873092	1392.834399	0	1465.56616	3327.301613
PG(14:0/20:5)	0	0	502.017592	0	0	0	401.1229382	403.1793074	0	0	0	536.1331569	639.7557387	669.9999146	0	534.0210768	0	0	420.5077514	262.1819431	0	283.3235405	0	0	0	0	0	0	0	270.7223324	421.8462675	0	0	0	0	0	0	0	402.9836716	534.2427814	0	0	523.9270102	0	0	501.1618742	0	0	0
PG(14:0/22:4)	789.6051338	750.710143	495.0787461	0	0	0	495.671429	499.181806	0	0	676.5017266	0	1476.215812	499.0159695	0	0	648.2566722	500.4756723	407.7951778	280.6154343	0	0	699.5351905	839.8592016	0	637.9729709	0	0	500.4756723	822.6085931	518.2012049	377.6864214	0	0	516.5481151	0	0	0	0	0	505.6047376	1260.399399	0	0	505.4771557	499.1781849	497.3025702	0	0
PG(14:0/22:5)	0	627.4817043	1013.132713	0	0	0	687.1690454	0	0	0	0	642.5802728	882.1128973	592.7001397	1064.146637	0	0	0	948.7430921	0	559.9156775	0	555.6643034	0	864.3467753	879.1600752	0	0	0	684.0770164	977.8181529	512.2124309	0	999.9507039	0	0	501.8862508	620.7119028	0	752.424684	502.9113486	0	749.4373581	0	756.9578876	504.6676446	0	507.3385733	1014.720448
PG(14:0/22:6)	746.5166223	418.334344	0	972.2856073	403.0791844	0	938.6667008	279.2075063	795.0747581	0	419.4103938	0	402.9107408	674.4684624	402.5175754	666.8222959	822.7341091	552.7298837	268.2117056	310.5913145	558.1274086	530.2996194	0	415.6080434	0	699.7155018	415.758599	0	552.7298837	562.6883219	1756.515439	632.1495338	279.7559103	1536.762788	1380.351448	263.2373153	414.4454575	410.4260527	261.3396187	1254.865491	1258.167492	837.5725972	0	830.6164032	847.4393308	279.5121418	642.7089013	671.7653157	936.2425013
PG(16:0/14:0)	1335.225114	1353.05661	643.3206115	820.2161923	384.899793	515.4438577	1021.21347	3142.081303	10070.33674	0	1226.631284	0	1930.561664	776.3740678	0	487.0394952	746.5191599	5790.071539	655.700175	0	1574.703827	509.8665599	685.6418618	0	962.3338664	1103.989766	0	1533.675251	5790.071539	388.1345515	1958.251741	1365.506615	0	811.652666	819.3494599	955.8522169	940.8799044	935.7850643	414.962776	6579.023838	1372.705134	635.3056508	488.9676866	413.3872009	1910.93186	270.3202272	0	1028.832304	1616.800463
PG(16:0/16:0)	14886.57935	15912.99106	16566.95158	6255.331224	14084.74774	12589.96418	8184.253689	22749.94655	47647.18412	1121.635552	4231.81678	6035.032025	16501.41987	10214.17638	6382.452265	3229.282079	10233.04303	19143.65916	4649.533621	10763.02121	10182.47216	2101.386133	19478.48665	6513.648956	9335.960301	12179.42641	1461.244734	6340.298386	19143.65916	6973.023626	9253.201057	9137.174507	5646.82639	11938.99683	9713.038449	12774.64128	9419.178551	10753.59711	4605.419878	28159.96238	8383.172392	17897.24307	6563.929587	11789.80361	9956.599013	3755.351088	3058.859267	7113.658801	6795.666654
PG(16:0/16:1)	3815.672606	6243.491851	5443.773881	1534.479246	2393.331281	2394.492154	2392.322041	14221.23439	31579.77672	276.8420589	4898.43933	1397.901286	2129.612399	3581.922505	0	1455.40964	6439.201017	11427.81961	815.8760209	4933.045477	12003.82941	2038.201664	3863.603903	1806.395538	4619.255524	2773.458521	0	2003.08654	11427.81961	2180.607905	4750.992453	3553.718463	1110.760204	4807.162942	1183.680252	2095.982047	2649.355888	4477.060044	2225.197172	23813.25557	6191.418259	6291.454827	2370.802395	1809.906714	6006.555241	0	3122.306383	6752.096659	3359.380467
PG(16:0/18:0)	6931.458798	12452.63644	5808.99102	7522.347687	11412.39869	6194.698835	6486.891571	8506.231118	11144.12208	285.1393446	4605.462186	4350.478071	9627.971865	8415.225409	6365.094055	3413.991345	6357.835492	11905.33313	3515.66957	2766.671878	3344.523056	2060.846683	7635.143673	3685.408273	8014.131653	8093.976126	560.7959919	3206.52588	11905.33313	8543.020039	6146.457063	4860.645933	1257.334341	9401.600546	9538.334835	10450.81524	4822.407288	12074.46571	1818.471319	16042.21921	8577.833571	13112.42728	7182.563788	4062.864538	7538.301282	2768.419881	3341.725783	6857.682218	3585.06926
PG(16:0/18:1)	110533.5869	216817.9279	147441.3178	84465.16535	124503.6503	148692.6135	108999.919	148605.5629	268784.848	10747.86297	152714.8999	84957.21841	143444.768	220461.6638	86245.88398	88833.18303	194148.6289	263207.4132	84304.44188	101762.7497	70120.0589	49828.98823	136377.2718	82146.19889	187737.5646	182257.736	22693.48077	133453.441	263207.4132	81460.55432	121005.2304	58690.04685	34034.77769	221874.4858	99246.44892	149910.3705	156738.9694	128517.0678	26559.54731	350980.809	182609.8701	256874.7896	73990.82949	131011.1753	173788.0612	25411.23121	119179.1977	208493.4863	120981.3674
PG(16:0/18:2)	40686.68323	52297.56797	47037.15018	19566.76611	44670.30192	26298.56151	31662.64417	56504.44954	72868.95339	3766.088251	31942.83337	33994.29037	42937.78515	51693.35746	38306.65651	25077.42772	41406.65797	80523.84259	25464.37632	49686.41301	36715.73641	23502.76442	42668.42273	28031.92276	39063.48711	44046.45804	5992.023594	30098.83606	80523.84259	22446.38043	33472.70802	27214.22015	9490.771328	45328.75788	27347.36368	38617.31032	26132.07204	41980.02012	6145.656327	111905.7424	50315.73653	68097.6705	49527.6874	32585.39905	35593.9461	13407.6	24803.52605	50268.94794	32457.47074
PG(16:0/18:3)	935.6368357	1391.658655	1202.615214	562.0421871	1464.240157	399.3068006	2137.405644	1421.559039	3330.143676	0	696.0625	984.0871677	928.5102138	2269.693344	1056.422273	374.950882	708.7094324	1297.4508	531.2949906	842.3824686	555.8188963	0	540.7123358	0	556.9354444	821.4804367	393.8178841	2945.846555	1297.4508	558.8328458	558.1307049	0	265.5626545	695.2539023	837.3665868	1820.58932	277.197419	1919.319781	417.3793557	2124.599704	1671.773866	1531.6293	2220.217176	0	520.9241209	0	0	1053.533001	399.196628
PG(16:0/20:1)	2596.413064	4032.323155	1599.792012	1531.620873	1872.756184	2671.147463	535.7325113	697.7685123	5880.659802	419.2774198	699.0054688	0	2271.38335	2140.186049	667.7239236	0	1172.686972	2609.7087	1529.918476	475.1313499	586.9886542	939.8480875	943.4645967	819.0493696	1398.310182	1664.645674	278.6889222	1564.139591	2609.7087	1609.512991	695.7117422	805.2859152	282.9133006	1536.581153	1113.512928	834.3338842	2373.10517	1531.555368	277.0892598	2362.005155	1806.19108	2365.810276	558.5602687	2098.253305	1952.467446	418.4355262	507.3299339	937.9504678	1469.124214
PG(16:0/20:2)	22826.10041	24196.70115	10668.44869	10435.92044	13094.98031	16878.63561	12401.90282	10071.57736	42546.80658	1536.461372	8523.554248	9998.447491	23967.40578	18331.71199	17347.51517	5616.818526	19109.26811	36016.0821	9462.282228	6945.028815	7538.663463	7440.583698	20144.29196	7644.392575	17798.23276	18066.55369	3076.145789	16304.02957	36016.0821	10165.91619	11796.06292	12371.23095	4176.974747	18360.50596	13576.25665	15756.81279	21231.60911	17504.37132	2232.083333	32339.01064	21741.89624	8909.057128	10643.04682	15673.70464	21554.4838	4190.691637	10479.32309	16506.01036	13719.31911
PG(16:0/20:3)	4513.819576	6233.372428	1731.276371	1743.717407	6789.005448	3337.356255	4877.625182	3450.627431	5181.314349	277.0050092	1259.597789	1682.034558	4093.251407	5778.489284	5103.013564	1432.860702	5661.584186	11620.11597	2935.492365	1945.407957	558.9863916	1522.229998	5598.944306	1817.990281	4001.049719	4177.06015	270.7242573	11612.30567	11620.11597	3232.192805	1465.750201	1868.647773	0	2336.243108	3445.606301	3404.106694	3619.412322	6403.486794	418.3312707	4759.670092	11233.06244	2430.289829	6850.837101	2095.930384	4702.008449	539.704205	804.88354	4058.596623	2203.482405
PG(16:0/20:4)	17937.83281	19113.83129	5640.48334	12526.02822	13329.69126	6404.561325	9102.425169	13627.16401	15781.03973	1359.514607	5250.313572	4818.698903	6861.069305	9659.287162	24949.8344	8170.939302	9528.490376	24539.15768	10424.38118	8802.121562	4688.167396	6355.114864	18315.56318	6713.912401	15183.17523	13859.5603	679.9887381	11350.7485	24539.15768	15691.28402	12339.93468	7230.850137	1193.023754	10345.87552	14655.06119	7348.232194	5966.644658	14714.40748	5381.216211	22458.52499	15716.48373	25192.92934	14993.8256	5431.510414	9729.186676	5283.372161	4912.525407	7308.814458	9849.744913
PG(16:0/20:5)	667.9758937	0	933.7095728	404.9232861	0	0	1328.525308	543.28397	1067.325355	0	0	411.6432424	0	0	0	0	0	1333.124554	0	418.3533604	396.173474	265.7865879	416.4032483	0	513.2475787	282.0672557	0	661.9402163	1333.124554	0	1204.957461	532.1919527	0	0	1229.239383	0	403.1722323	1091.719062	550.23433	686.3868894	275.206599	0	818.0083797	274.6606063	543.4450341	0	0	0	0
PG(16:0/22:4)	1321.10658	549.4801441	401.0299138	274.1653296	1068.188288	0	0	689.4195025	0	0	1242.954218	0	1056.864815	801.8527839	0	0	406.764773	0	799.4080731	536.9305842	265.6360017	0	1391.122943	550.5117329	682.8867061	263.4981364	265.3059891	661.0503243	0	393.0538358	784.9057699	0	0	672.5162202	1511.006533	2203.834238	551.5127337	0	822.2765127	551.4498294	0	686.7475852	0	691.0772834	0	413.4960963	405.994953	534.1582095	934.7839309
PG(16:0/22:5)	1190.565706	1648.444029	0	680.652472	807.2495501	536.1428544	1205.879898	405.0641839	1046.369213	0	0	693.4322408	648.1968982	804.1139716	402	0	817.7345378	1047.09119	903.6103756	0	491.433369	0	692.666874	409.1382543	274.8811017	834.2564492	391.8146611	1451.639031	1047.09119	527.6332148	1139.600997	401.9950349	0	574.7624505	675.4738524	1661.098064	277.2105388	1652.335551	0	1245.707193	846.8535709	0	412.5549835	699.9984669	542.5242267	830.7811016	0	1204.688496	398.6904652
PG(16:0/22:6)	1383.638604	828.045831	725.7402099	645.8691013	0	1330.887484	1813.453402	273.9590491	718.6175521	0	687.0306447	550.2316029	0	1209.361592	1306.527102	658.3377151	811.2974056	492.5607615	504.8674014	404.3004064	758.2132548	397.8169524	891.0541106	1146.531326	687.3272204	886.8699819	275.8455219	978.1636106	492.5607615	1004.850255	1663.753084	482.6365514	0	780.7515038	273.862132	411.3029816	0	0	0	415.5690929	1108.899125	1639.104558	1105.422039	959.2390672	690.2579609	0	0	968.0170329	726.2777479
PG(18:0/14:0)	918.1423604	838.782741	0	0	611.3834032	845.9682578	604.608	700.7836196	1333.237024	0	282.2727429	980.5622413	0	0	482.5035049	366.8976404	0	2867.846102	265.9465295	0	929.4799	0	823.8454018	0	977.4670235	552.982216	0	0	2867.846102	0	0	0	0	837.4912142	562.788511	258.6844961	560.061599	837.0160035	423.3929566	983.968719	1397.587422	841.7124687	693.627236	415.6871678	417.3677114	260.8460402	717.6814208	482.2835684	690.6138266
PG(18:0/16:1)	2738.323765	2117.678766	1739.476614	1809.918856	4140.698557	1872.320653	1069.78197	6593.534231	11988.27915	418.4106429	3558.024132	418.9940712	2140.161959	396.6171271	1194.468066	1201.206435	3000.063517	3839.391424	0	1518.297854	3291.591728	0	2510.084034	1092.162214	1792.066007	978.746564	566.1182457	1958.446723	3839.391424	1926.690398	681.9139355	2285.655045	417.6426842	1260.803156	1252.727046	2267.117547	1945.476913	1688.661458	699.0213714	8233.50909	1111.882278	3202.960709	1115.633038	0	3125.61699	0	0	2137.990777	1205.729484
PG(18:0/18:0)	4867.92688	9032.384525	1475.597837	5442.716012	4334.344683	2986.691605	4651.979312	6582.145176	6540.980759	276.4733492	8216.271153	5286.461326	4049.821926	5270.07605	992.9018578	2654.560397	7700.908423	8804.752527	3674.707216	2919.392407	1110.638447	1252.215434	3608.93942	4995.645048	5042.488475	7019.126288	655.6404887	4512.634861	8804.752527	3871.288795	1932.905335	2137.036154	1115.763356	7490.935554	4290.048905	4758.467393	3933.365846	3460.776772	419.3609649	5338.038603	4041.136833	9829.81583	3333.362157	1938.271994	6946.503674	0	2959.076957	5395.637519	2566.963555
PG(18:0/18:1)	102003.9523	187766.1397	68806.97948	70663.8779	92458.85943	90166.96932	67537.77917	72627.3565	78185.20288	6710.295037	151208.0682	59149.44276	89253.69934	108070.883	40653.89063	66106.46328	164360.356	220110.05	38056.06771	74153.2526	37021.19823	33193.73263	84611.21478	60064.42434	87755.65251	119521.8604	11169.43341	78197.36525	220110.05	77291.49732	88773.31894	53550.03238	19757.24687	130895.1153	72921.84511	99438.60244	65965.87078	55800.78839	8807.078277	133821.4238	86118.8006	238346.7521	45867.59704	51866.9054	116448.4376	12510.11576	52338.91491	109367.8513	52988.23936
PG(18:0/18:2)	95945.65217	132059.8349	46274.74375	53759.84815	94448.46039	61968.35568	55326.94401	54886.78958	128313.3718	6664.102659	81545.69363	63705.81824	80193.81831	96189.15568	53109.21097	56631.55191	110647.4276	152739.8927	44907.47123	81124.69573	49801.93445	36629.46608	57691.07607	51748.41251	96046.3939	112253.0849	9825.546465	79193.85901	152739.8927	82202.17399	56843.51723	50131.10766	17950.83994	77720.52729	63869.63091	107536.7659	56478.82662	65388.74754	8556.955684	143926.1449	75496.33638	126880.7538	69247.234	79927.91984	96176.16165	19697.31167	57190.64717	109312.037	83004.41258
PG(18:0/18:3)	959.3005109	974.3493282	0	837.6530025	1094.627973	602.8921713	970.730855	836.1996382	3434.568157	0	699.0739024	418.9565773	0	845.2874179	2674.228375	365.1539027	971.0153694	1090.93084	395.9764803	271.8300581	266.9422175	0	1119.875582	414.4513527	978.2225839	699.8460835	280.1157818	2554.944428	1090.93084	1492.128698	790.3649653	0	0	969.4560702	694.746394	2082.004382	272.3918742	992.3467878	0	3067.202253	1388.62384	836.5855645	1816.148563	0	415.0370616	418.7972462	612.213595	1696.359944	0
PG(18:0/20:0)	1622.235011	1326.176508	454.9331505	1259.808735	768.4411479	1341.997633	1106.414679	502.4178448	1125.643192	626.7703222	1881.580051	599.5568315	740.4974933	1119.763493	762.4631572	591.5682656	867.296689	1610.657783	1948.353734	1244.581936	0	558.1471894	1139.950202	1578.653023	1244.415033	1250.525337	0	1818.094356	1610.657783	694.6442212	2022.245848	554.559183	0	951.0663453	476.1857214	0	689.0302949	641.1405898	0	817.3287088	503.551768	347.7759003	586.4381555	875.97674	477.9104495	477.5680277	1129.901509	1797.118907	897.6384566
PG(18:0/20:1)	1287.604943	2356.618728	535.5542898	692.7788604	1473.472389	1091.160905	1071.305115	832.0011475	1606.927862	0	834.2137622	1823.340958	0	0	0	0	1902.588559	3599.936847	940.4744371	832.6537552	684.6204582	277.5695073	971.345681	275.0476586	972.3888768	2502.234433	278.6649334	1003.749121	3599.936847	1087.654503	1068.963476	936.5446138	416.0637496	1107.339856	1107.192121	1802.173037	1108.591998	416.6249896	555.4257305	1660.239947	1944.631738	1663.753029	556.5724184	833.2203925	2909.877557	277.0397747	531.8640863	0	0
PG(18:0/20:2)	19112.27807	20478.68094	5300.46542	7067.266034	15750.93111	14623.43778	3627.422124	5126.204513	11484.50931	970.848116	9554.667158	7759.029108	11871.64063	7636.365381	6592.901258	3622.330304	16832.12257	31618.13989	6322.214502	8892.278739	5880.508761	6275.258437	10052.08275	7084.195585	11792.27145	8861.693995	2088.062371	11841.55848	31618.13989	9145.596827	9077.452938	8258.942376	3331.725966	9745.215433	7736.138462	8498.830787	8730.980005	7115.644808	0	11449.9414	11302.09654	11983.61139	4272.579605	5686.860205	11632.25662	1246.621017	3745.601267	5010.915253	6096.338052
PG(18:0/20:3)	9662.341641	9866.799699	1739.996137	2321.553802	7351.562177	2142.345323	3906.183319	3293.878456	9623.194992	692.850373	6593.189607	2346.054733	3735.664261	3896.092323	2007.322198	1173.561978	2909.748591	7465.910797	1016.466354	1783.034386	1997.959894	968.9007803	1799.716907	2432.357126	3984.24572	4201.174117	278.1491249	6684.505482	7465.910797	1880.686586	1206.624725	3393.410499	693.3838853	1799.205862	3402.798602	5556.553532	1802.144344	3709.231639	552.7213068	5193.476798	5799.442436	2318.921871	3428.150617	833.844894	4021.657093	853.1691041	2008.115869	5347.933528	2373.299672
PG(18:0/20:4)	16642.62598	32516.67695	7846.896535	13142.58093	42995.11581	4006.567044	10081.25211	14124.00321	9420.317655	1052.413335	9396.75129	9080.818439	24049.04252	6254.720022	9234.522696	3800.109531	15611.14657	13373.64354	11825.16233	7235.329963	2634.631386	5472.217436	19684.07468	8627.797887	12389.96148	21623.13128	524.8350629	10308.13334	13373.64354	12582.76983	10482.16666	6583.503208	1708.449974	11100.24423	20827.60474	24652.33028	6942.713582	21750.96552	2362.279428	17148.03535	12174.28376	15780.11173	6543.654346	5549.445941	8014.792967	7090.35852	2491.868551	8842.704783	6357.433578
PG(18:0/20:5)	817.5411022	646.7258864	383.6158039	501.4545474	0	0	0	386.8862622	0	0	0	0	0	0	0	476.8798902	503.8218063	0	0	661.8068611	0	0	0	423.4206393	0	0	0	0	0	277.0744779	0	0	0	0	0	514.6983115	0	0	394.9541085	0	390.1900271	0	0	0	0	511.925578	0	0	383.77126
PG(18:0/22:4)	509.8294262	652.3147961	0	1044.994103	1157.787405	444.4621452	0	519.7908144	643.2	0	392.3082871	0	2058.092813	0	389.3752918	0	0	0	270.6557018	259.0754417	0	521.4379079	1317.280226	0	0	1688.542423	785.5685808	514.8856713	0	266.4255143	581.9099422	0	0	0	1177.8054	376.2267333	0	1107.26116	0	0	649.4893673	0	0	0	0	0	0	0	0
PG(18:0/22:5)	1106.562174	1057.968559	0	397.4124652	1178.043806	0	639.7994908	0	653.9199016	0	930.3613301	666.7866675	368.3319392	0	0	0	1042.527934	0	0	794.7323052	262.7666528	0	1078.419083	270.52487	400.0484228	796.0743014	0	1416.689688	0	378.7349565	392.8841639	0	0	0	401.7156337	801.0605932	799.9214357	0	0	0	398.3721689	0	0	0	0	0	653.9357122	0	0
PG(18:0/22:6)	413.0443318	0	0	0	664.3857946	0	1295.639552	0	0	0	443.1382215	469.6269268	0	496.2683724	0	0	1752.081596	537.5522984	832.167129	0	0	0	0	0	0	876.3523035	0	1208.311729	537.5522984	0	0	0	0	0	0	0	0	684.803918	0	0	0	524.0125173	0	0	0	0	0	0	0
PG(18:1/16:1)	2276.42173	5020.327818	3796.915101	4107.999553	4704.311475	1807.064808	4723.647939	2634.301571	3086.28138	562.9442069	2973.706878	1947.174939	4367.470018	3407.087635	2802.407964	1685.861991	7162.953811	4407.639621	6307.330908	2090.711337	1595.571743	2428.982553	6132.88348	3614.419759	3789.155001	6394.550065	1844.520142	2973.498465	4407.639621	5820.266122	4384.242245	2646.013728	1248.398281	3822.706169	5134.074786	4428.62453	5533.831627	5086.093791	838.0238405	6100.684304	3362.481518	6194.709149	3418.639773	1941.881822	6086.821195	2201.214395	4062.759004	4567.113106	3341.052932
PG(18:1/18:1)	18510.56792	18892.89901	16054.15795	15418.83973	34280.68662	17128.2934	13719.43933	25241.9506	16775.58361	964.4112763	26760.22472	13886.85598	29566.45578	14214.80313	13382.15378	12825.65782	26099.07343	25434.54517	7136.334062	12399.12271	6603.011347	8440.813706	24383.7159	7680.936298	30538.77036	18825.51731	4145.064098	12985.64361	25434.54517	14734.63323	20332.04398	6248.16714	2222.07577	23377.10919	17186.35234	19476.48252	21514.84406	18045.43942	4574.471001	27049.8585	14970.58791	38535.97372	12562.68988	19757.29575	24427.98885	5918.640511	11971.18623	251863.351	195426.7746
PG(18:1/18:2)	170521.8917	27124.4315	36678.00981	24397.16376	77562.89992	26735.57974	13057.434	39612.51367	59147.62521	2232.226341	23558.42061	17494.36485	72469.62047	24904.28117	19043.73143	170384.7755	90255.71058	37127.11041	73934.46194	44144.10772	11093.26666	30230.88661	106963.0508	32776.26878	65061.08311	102791.0842	17326.89032	44028.89044	37127.11041	53865.21092	92122.93981	26359.88733	13831.43512	106918.2852	17474.79338	80434.16652	239837.2883	29271.7505	7525.6731	69148.12039	80089.81274	80727.89205	95949.77207	106705.2263	123292.5846	18679.29101	130111.6713	112548.4812	45766.51606
PG(18:1/18:3)	0	1250.672067	0	424.6909353	1606.852329	405.7465329	669.7260677	610.7907079	0	0	1110.295103	972.2735158	0	401.6067202	0	0	0	1331.561028	2174.058998	1734.948498	0	0	697.3177744	0	977.5202949	1663.036087	0	850.6185135	1331.561028	1153.935782	3088.901589	801.0471378	0	1659.799138	420.837059	650.1964545	654.3682738	417.2505454	279.6677897	557.7867977	962.3525408	279.1379543	1455.326997	0	0	0	0	802.9830133	0
PG(18:1/20:1)	394.3359704	1198.408033	389.8502549	406.1029675	0	391.1879194	652.3092593	798.8169884	0	0	0	0	391.28	0	0	0	398.0577946	0	268.0485927	0	0	0	404.5678286	0	0	0	0	0	0	378.0361835	0	0	534.3387061	0	0	597.4162838	0	0	0	0	408.1249129	400.0090132	0	800.9727599	1197.545621	0	0	0	389.6164391
PG(18:1/20:2)	795.739519	1809.229889	1473.937736	423.9336505	804.784196	536.5070467	536.3310157	700.021578	1340.767582	0	977.5004327	973.6585916	666.4850456	670.536	0	0	1450.56821	392.6778459	396.6868998	812.7113988	0	394.9948988	415.2106018	0	419.1401449	836.6012233	0	1847.637265	392.6778459	0	799.4525726	0	276.1141362	973.4278275	1261.916812	1112.149525	839.5701063	406.8665908	279.5358707	554.7270648	1672.017648	1439.849791	0	558.597376	1664.23576	277.8579921	540.8371379	1073.124922	530.2352057
PG(18:1/20:3)	1090.932718	1524.228453	399.2334093	542.6097837	2815.754135	528.5944996	385.6136518	945.3584415	1836.02716	0	666.9430669	1096.811393	2126.651043	789.6765694	797.1922148	0	1372.872623	966.1183059	1805.317313	564.468911	0	258.055781	690.7427849	690.9563835	1364.226949	1361.751239	0	803.5230816	966.1183059	1017.851016	385.9794821	0	0	1776.896706	640.3389257	1504.031729	1219.462262	880.559518	273.3264572	803.1810641	547.772085	540.3302313	555.857793	411.7308559	544.9923345	410.2539564	665.1558453	1058.103543	532.1747994
PG(18:1/20:4)	4905.596819	7641.669444	3704.423033	5367.666998	11456.68553	1495.372194	3424.526232	5581.161385	2886.252774	0	5621.547588	3096.502494	8902.271816	4356.645974	5909.618303	3240.863068	6293.8345	6627.423702	3495.495364	2266.743128	497.6669423	2418.804226	7405.517111	3280.960949	5082.791665	8732.784924	518.9406507	4806.116557	6627.423702	4662.358914	4073.277831	4405.711467	1057.289541	7163.245898	5017.879026	9152.487946	4868.104058	4381.252318	1192.009612	9603.70899	6032.130398	3143.839836	5106.913323	1350.75407	4522.007373	1269.207666	1781.713136	4011.482238	2919.958044
PG(18:1/20:5)	675.4865437	407.6558585	0	0	395.031387	0	0	413.9520339	0	0	383.5879497	646.0929805	0	0	0	0	0	0	501.9397367	0	0	254.6640869	268.2367578	411.7989523	273.9855241	681.6604243	279.488395	0	0	0	0	793.2839074	0	663.9207397	413.2908546	964.8421664	0	421.8411857	0	413.218678	690.9860031	688.3379518	0	0	0	0	0	394.2806658	0
PG(18:1/22:4)	496.8159245	1378.911454	505.6154721	276.6298041	400.0769532	0	0	557.2662881	0	0	553.4267947	415.6124385	869.7345108	0	0	400.5781027	815.3884999	0	765.6701122	381.1742271	0	0	1089.195877	831.4052861	968.7689462	1357.938397	0	0	0	995.5167049	391.7803837	0	0	0	895.6978215	413.7679799	1108.026893	975.086657	0	0	834.838001	262.6185342	0	414.6163665	0	418.3017204	0	0	373.5064435
PG(18:1/22:5)	994.5951712	992.760428	0	535.7009425	0	0	0	754.6949766	430.6012247	0	0	0	673.658347	987.5450068	0	0	407.4992984	815.1501277	0	0	0	0	565.3190354	673.7408352	1208.750851	0	0	0	815.1501277	252.2053997	520.1791619	0	0	308.5163403	605.0509705	0	0	881.3945824	0	441.5804581	0	0	461.1557478	0	325.4418665	0	0	5449.973455	2070.430772
PG(18:1/22:6)	1000.264851	1659.045039	587.0841987	579.653072	828.9166538	471.2217954	1051.590713	594.2960206	0	0	0	588.2504969	1310.320955	990.3965919	710.0634783	0	0	943.5536877	861.1752798	614.3855496	0	0	0	0	1201.364474	0	0	1059.590907	943.5536877	382.7947246	256.2024327	707.7148218	0	712.2975437	479.6490794	620.619321	0	1197.154343	489.8900715	1186.876065	1107.55372	356.2729859	358.0066333	0	2385.874414	0	0	2957.998279	1056.455198
PG(18:2/16:1)	7607.170302	8914.838465	6528.774275	7893.41979	7447.817709	6273.06405	10107.30015	2424.218006	8113.903162	820.6760207	7991.719121	5744.67638	4922.954078	5986.334059	7281.68292	3220.841673	9441.491455	11765.39067	5598.864669	6381.284992	3124.818411	4750.720963	7228.317216	4969.276523	5772.763837	6941.454109	4153.85941	8851.861348	11765.39067	7279.404188	3254.850217	6017.640444	2286.76903	15068.22012	7138.507554	6547.814647	6843.750737	14565.6631	1189.834788	8311.080184	10006.45728	11135.80748	7741.801573	7037.068649	7820.571544	3831.703647	3078.293341	8606.401797	3559.829022
PG(18:2/18:2)	20405.75243	27670.84738	7519.460163	15180.24633	20846.76808	3000.686423	10352.05322	6723.966468	6257.39347	0	12710.46763	12565.94368	28287.1529	8453.542383	13746.86153	5109.424637	20103.6699	8941.331257	13583.97324	5741.283575	4664.593229	6588.441568	23551.48173	9990.419978	8912.073518	29045.98918	2090.331503	9457.973172	8941.331257	6044.032241	7048.372704	3809.035843	1888.311096	11144.75466	20377.06509	23630.70623	7073.179605	9681.936561	960.5736752	4404.969799	17966.67836	12369.21754	8024.003662	4791.86104	8595.967927	6996.991903	7285.453707	34890.5854	34084.88009
PG(18:2/18:3)	3624.220499	1904.076397	704.2133309	1032.623903	2241.524306	0	2483.40119	1100.685812	1401.469711	0	0	0	2634.549551	1035.636788	1149.292715	897.2766831	1746.182964	1195.224268	2575.186522	0	0	875.8948846	647.2275977	2363.585308	1176.438033	2222.934896	0	2982.094997	1195.224268	1394.910411	1909.965679	1327.354815	0	0	2350.7064	1400.72488	1306.084066	0	0	2547.550778	3091.598855	1659.157263	4039.732569	426.1442332	0	656.8816032	1506.125165	1629.686101	426.6194546
PG(18:2/20:1)	380.262867	0	0	0	0	0	0	0	0	0	0	0	0	0	0	0	401.3627907	528.3129686	403.753135	0	535.3474618	270.5887642	256.6368245	0	0	267.9510679	0	374.085646	528.3129686	0	422.8677234	0	0	0	0	0	0	0	0	405.4323216	541.8	0	812.8067093	541.6668988	0	0	451.3317693	327.6931426	0
PG(18:2/20:2)	4076.762909	2438.607354	750.6830738	1447.875752	1336.659061	1808.890373	1238.471541	1612.84124	800.1723067	0	1099.660963	1384.693609	5490.738488	1719.309891	1372.719887	3434.840998	2804.168856	2206.540842	2671.315904	1731.342207	0	0	5816.990949	0	1927.682761	3294.658409	0	3003.118638	2206.540842	1154.623244	1809.667215	1303.744453	876.1070307	962.3570861	2147.830018	977.6838226	2796.771026	553.3246243	0	2558.517538	2449.495891	2599.025999	1859.150655	2064.049599	2329.233327	975.9976337	5782.19617	2240.081559	1770.850807
PG(18:2/20:3)	1833.611494	1634.526144	0	357.6610615	865.4096866	1435.80568	767.6224277	0	494.3035635	480.8963873	631.3017239	0	0	448.9173232	927.0264736	0	1888.453578	776.7135524	713.9541375	375.3495751	0	0	762.8185997	374.5082699	840.8189627	361.285241	0	0	776.7135524	876.9626792	458.9011154	0	0	0	0	0	357.2250398	0	0	352.5585183	388.8732884	0	0	0	517.2701992	0	0	0	473.9302604
PG(18:2/20:4)	4728.011938	2894.885042	1944.227088	1404.392003	5808.475437	2045.147216	5414.685517	2506.483397	2551.895637	0	2050.12429	2530.234405	2580.747809	2189.144263	3400.258991	2534.847799	4947.646456	2983.774869	3314.972302	2830.624734	2202.468528	988.0099198	7100.173765	2995.24223	2130.496362	3045.273066	804.0132488	1953.666873	2983.774869	4164.345341	2728.677324	1983.00715	369.5247997	751.735201	1913.36492	3144.678697	2422.731545	2387.246211	0	6797.742579	1790.965771	3609.496795	1847.896453	2045.549628	1831.823181	1183.820373	2513.492501	12141.97104	8509.030504
PG(18:2/20:5)	503.9154662	0	532.0372586	0	534.392	557.7319804	396.3718782	0	0	0	0	0	528.7109049	717.630999	539.1399048	0	502.1105111	516.3535194	668.2967935	396.590595	0	0	812.2585523	0	0	0	0	510.6214833	516.3535194	384.8274056	0	0	0	0	398.8137756	0	338.894897	0	0	573.3259067	576.4530412	0	0	0	0	0	0	0	0
PG(18:2/22:4)	640.5445812	0	0	362.3283714	0	0	365.6766299	370.2930434	367.16	0	614.3015606	616.6608641	0	0	0	0	919.3807513	485.8529456	0	252.987928	0	0	503.5866716	0	0	489.1060608	0	0	485.8529456	378.8493889	396.1560696	0	0	0	1234.640358	370.130205	0	0	0	0	0	0	0	0	0	0	0	0	367.1600422
PG(18:2/22:5)	371.5298525	0	0	0	0	353.4780406	0	0	0	0	0	0	0	0	476.290484	0	0	371.0209533	0	0	0	390.7855527	387.1889017	0	0	392.8997811	0	528.639865	371.0209533	384.3712012	396.632535	0	0	0	0	0	395.0227895	727.0428906	0	0	366.2497735	0	0	0	0	0	0	0	352.6039363
PG(18:2/22:6)	770.3167402	659.2703815	0	658.7020358	651.7689181	510.3073985	527.3107888	465.252004	0	0	623.0733294	0	1171.417277	0	0	0	375.0910022	512.3277659	0	277.2922471	0	0	0	0	0	914.0303901	0	515.0086506	512.3277659	518.0902765	402.610187	512.3647044	0	662.2943789	402.7807634	0	400.1954985	0	0	541.4924496	534.3721391	405.9380226	0	662.2098929	0	0	513.5090548	1788.22607	1066.057755
PG(20:0/16:1)	0	0	0	0	0	0	0	0	0	0	0	0	0	0	0	0	0	282.3677713	0	260.2471184	0	0	0	0	0	0	0	0	282.3677713	0	0	0	0	0	0	1205.418417	0	0	0	744.2177631	0	0	0	0	0	0	0	0	0
PG(20:0/18:1)	2255.544677	0	1020.216501	0	516.9604288	1161.780928	0	0	0	0	0	0	1612.975722	519.9933933	0	0	1333.821354	1369.460566	672.2407695	393.9646607	415.0765499	417.0950161	1573.208987	0	636.8822783	454.4769786	573.1148827	1181.654346	1369.460566	962.6380952	667.2011371	0	0	538.6795387	0	0	1178.95939	0	720.2795564	661.0158661	824.809191	1010.446761	900.2319304	1438.471382	1176.495568	0	1212.082097	1748.143061	0
PG(20:0/18:2)	1707.636192	0	671.3468125	1177.888148	624.0697055	0	0	0	0	0	0	0	1785.609866	1145.705206	964.4664573	1053.71533	645.5914152	1504.112456	1039.244452	874.1132634	401.7561647	583.9977954	0	0	0	0	0	1236.238333	1504.112456	1551.384555	768.4073732	0	0	391.4627266	1847.3887	0	0	0	0	627.0616704	0	0	0	0	821.3427432	0	0	0	0
PG(20:0/18:3)	0	0	0	0	0	0	0	0	0	0	0	0	0	0	0	0	0	477.40364	269.6354091	0	0	0	0	0	0	0	0	0	477.40364	0	0	0	0	0	0	0	0	0	0	0	0	0	0	0	0	0	341.0708068	0	0
PG(20:0/20:1)	0	0	0	0	0	0	0	0	0	0	0	0	0	0	0	0	0	0	0	0	0	0	0	0	0	0	0	0	0	0	0	0	0	0	0	0	0	0	0	0	0	0	0	0	0	0	0	0	0
PG(20:0/20:2)	0	0	0	0	0	0	0	0	0	0	0	0	492.2424935	0	0	0	0	0	0	393.2342601	0	0	0	0	0	0	0	0	0	0	0	0	384.2852707	0	0	0	0	0	0	0	0	0	0	0	0	0	0	0	0
PG(20:0/20:3)	0	358.3292163	0	0	0	0	0	876.1571913	729.8261287	0	0	0	0	0	0	366.624	0	369.2706426	0	0	0	0	0	0	0	0	0	0	369.2706426	259.0398284	0	354.5355435	0	0	393.3745206	0	0	484.6169887	0	0	0	361.2995491	0	0	359.1508031	0	0	476.490289	0
PG(20:0/20:4)	1045.766817	808.4395708	802.1548699	805.8247103	600.4153977	898.6709324	563.6749284	598.5986705	0	0	502.9770512	773.5545884	1645.322752	690.4781657	1293.50212	0	1316.74494	763.1073604	1120.924707	873.3460151	0	252.1777781	1204.168258	1455.414846	0	787.3911039	0	1151.598936	763.1073604	514.0087422	814.6855456	1401.419719	0	842.6121592	1086.853753	0	0	1289.643357	0	1074.048814	962.0006006	1351.733358	704.9620572	0	799.0677516	0	800.1526789	939.2490576	619.1713539
PG(20:0/20:5)	403.2006064	0	0	0	0	0	0	0	0	0	0	0	396.9004918	0	0	0	528.7979684	792.0779171	0	0	0	0	0	0	0	0	0	0	792.0779171	0	0	0	0	0	0	0	0	0	0	323.1959614	0	0	0	0	0	0	0	0	0
PG(20:0/22:4)	0	0	0	0	0	374.8259479	0	0	0	0	0	0	0	0	383.9377764	0	0	0	0	0	0	0	0	0	0	0	0	0	0	0	0	0	376.5161751	0	512.2250433	680.834629	0	0	0	409.702906	0	0	0	400.0462598	0	0	0	0	0
PG(20:0/22:5)	0	272.084312	0	0	0	0	0	271.0389784	0	0	0	271.1179762	0	0	0	0	328.9424307	0	0	0	0	406.8375965	0	0	0	0	0	0	0	0	0	0	0	370.1737676	370.7810943	0	0	0	271.04434	0	0	393.911297	0	411.4510338	509.6829984	0	0	486.6348595	388.2173839
PG(20:0/22:6)	330.6744333	0	0	0	0	0	0	0	0	0	0	0	0	0	0	0	560.9605954	661.4763303	0	301.5473159	0	0	0	0	0	0	0	0	661.4763303	256.6444105	0	345.594862	0	0	0	0	0	0	0	0	0	0	0	0	0	0	0	345.4762354	0
PI(14:0/14:0)	578.2686356	0	0	0	1116.01165	529.3761403	549.378189	0	0	0	0	0	0	0	0	0	0	0	0	0	0	0	0	0	509.7187181	0	0	749.5370201	0	0	0	538.8191612	0	0	755.4139776	0	0	0	0	0	0	0	0	0	0	0	0	0	822.5831017
PI(14:0/18:1)	2674.80251	5753.592087	3091.167359	4678.566807	5675.44543	3102.439059	4553.329251	7652.828974	4545.080961	0	3090.811964	3324.896557	4128.768576	4369.828937	2619.780536	3471.988686	3988.872881	6017.093327	4067.264625	747.0327568	1173.039182	1467.293451	2776.255387	4376.601714	5168.486157	2910.849032	2015.404435	1951.151228	6017.093327	2650.477414	7328.701406	4325.495614	0	4860.260497	5425.414441	4730.208124	6360.030144	8478.568791	1153.615128	7989.075433	11484.17425	2813.546732	2505.671063	4294.516384	7369.93208	593.9233814	4072.228982	1712.448064	2395.375682
PI(14:0/18:2)	6929.099146	11650.58282	4380.499391	12984.21703	13460.72796	6773.596508	10888.90751	6517.642712	1943.45078	1132.243132	2933.117758	12425.07019	6908.93949	11381.07308	12080.97285	6860.613015	11504.52885	17190.08742	7745.722329	10474.41494	4738.44406	2348.102289	10404.51423	9961.076955	15190.32902	11603.2006	3761.969582	11173.201	17190.08742	9041.637012	13668.27272	6782.313218	0	11182.26352	20889.0304	18292.33656	6623.311884	32493.94403	2622.260514	7131.509998	22099.40425	5917.746535	22238.53899	11288.8368	7965.340496	4174.854783	11546.07313	8577.225248	7881.52611
PI(14:0/18:3)	0	0	0	0	0	0	554.6182512	0	0	0	0	0	0	0	790.8561308	0	0	300.0031554	0	368.9271015	0	0	0	757.7673879	0	199.6589307	0	595.3696403	300.0031554	0	395.4708973	0	545.1370733	0	0	0	0	0	0	0	257.7265118	0	0	0	0	0	383.7621597	840.4820614	0
PI(14:0/20:1)	1056.240119	0	0	0	0	0	0	0	0	0	0	0	0	549.9415235	0	0	0	2015.537159	318.1045027	0	0	0	0	0	0	0	0	0	2015.537159	0	0	346.4563162	0	0	0	0	0	0	0	0	0	0	0	0	0	0	0	531.5356794	434.2011718
PI(14:0/20:2)	1009.925411	0	0	0	0	0	0	1161.298541	0	0	444.5432325	0	570.9892127	0	0	0	494.2053059	522.0779373	822.7942657	255.7299075	0	0	0	0	850.9809649	511.6674647	0	0	522.0779373	549.329538	784.2071791	0	0	0	0	0	0	0	542.4347258	0	0	0	573.6971576	0	585.7429761	0	563.3197526	0	582.230656
PI(14:0/20:3)	3793.242722	1645.154192	4240.826459	3041.641201	2083.222308	3508.889558	2696.357637	2837.800142	1135.96332	1142.903114	599.1210907	1460.210698	4044.59154	3355.394935	1280.741328	2446.252587	4057.621109	4721.390422	2367.702332	2868.044016	3002.710004	4119.194984	2476.737681	3464.381439	1642.115665	2101.532562	973.9478958	5220.827956	4721.390422	1423.249601	1970.466809	2470.866107	879.2425265	1897.624111	2131.465035	2110.238174	3512.12149	2296.956658	1371.13575	2521.491786	2910.758589	2058.416833	2789.563825	1984.132037	1908.257746	2422.770258	3529.955092	1414.304141	0
PI(14:0/20:4)	9732.110496	6722.369562	7248.594916	8942.19104	6397.855059	1510.87406	6639.89225	6969.576178	5246.320027	0	8397.361932	7537.098116	5575.476514	7627.563868	7331.589796	4256.431333	12492.82727	6878.830878	7082.956188	7508.749874	580.9372803	1436.914563	8239.738093	6537.55658	8816.45954	10520.0483	1899.486888	4667.656792	6878.830878	4313.791212	8658.215987	10001.45892	0	7312.136607	18166.57011	8291.087161	4990.365911	9009.541237	1886.194517	7339.615475	7949.629945	7783.001256	8620.499862	5069.926917	6237.122651	2269.940264	3209.703965	3639.552451	11489.07271
PI(14:0/20:5)	1513.121924	555.1308107	0	1431.139965	0	586.7054987	1737.026307	2838.166221	0	0	1956.807325	540.4323129	878.7311298	2183.412332	0	0	448.5464911	906.542453	2015.650987	0	849.392136	0	1422.484285	550.8901548	547.4548878	1104.019092	0	270.3618154	906.542453	1157.579986	0	0	0	1713.895231	1955.686317	1374.70251	847.132668	1093.20196	0	0	2198.197523	0	0	538.5003476	2274.366785	0	0	853.0136617	1421.256608
PI(14:0/22:4)	2120.002329	0	0	1127.990005	860.7287097	0	585.0448666	1694.858477	0	0	0	1076.90567	1203.406259	1173.82957	3553.609025	0	2389.684779	0	1158.791098	575.6095961	576.261824	1146.095947	1707.180553	2271.400165	0	1093.863829	1642.415239	1196.193578	0	577.5704998	2019.790645	0	0	842.0397339	1650.375644	0	1123.870208	1641.884605	0	562.9451994	1092.376396	1633.411558	822.6468569	2186.969103	1165.730781	0	2086.786416	0	1800.530786
PI(14:0/22:5)	1207.199425	1664.003612	0	856.4542934	2034.746918	0	1103.146854	1300.56982	722.2874612	0	574.1851071	689.9909086	1316.567423	1742.840267	1164.51184	0	1492.873501	902.0505602	869.4433502	868.9040189	0	0	836.5408675	1422.092734	0	1920.875032	807.9500924	1803.847612	902.0505602	1149.023364	3181.060854	0	0	652.335793	1560.519952	0	0	1363.93338	0	563.2742676	817.8319716	664.8245454	784.4708107	590.4762751	1711.555754	0	2231.497391	0	0
PI(14:0/22:6)	2728.139187	0	0	1268.320953	1365.954156	0	1100.256244	0	0	0	0	0	0	548.8919831	0	0	1185.578233	2671.588462	0	708.0654268	0	0	0	0	567.0797208	0	555.274513	1185.785941	2671.588462	0	0	822.7102312	0	0	0	0	0	0	0	0	0	0	810.3023249	0	0	0	0	0	555.2440852
PI(16:0/14:0)	604.9782237	0	0	0	0	0	0	0	0	0	0	0	0	0	0	0	616.4287634	711.4221241	0	0	0	0	0	0	594.0928047	0	0	1096.098162	711.4221241	0	0	0	0	0	0	0	0	0	0	0	0	0	0	0	0	0	0	0	857.9540378
PI(16:0/16:0)	3734.38753	0	0	934.3363489	333.1461702	0	0	512.7002744	1880.313357	0	0	0	0	0	0	0	0	0	0	1004.257846	0	0	0	884.0639704	0	1512.874048	0	0	0	0	909.4526642	565.653646	0	991.2931447	2594.549432	0	969.9350904	499.4710978	1054.029864	0	0	0	1037.336157	0	0	0	1045.397642	1565.177748	904.2996617
PI(16:0/16:1)	0	1784.367994	936.0976337	0	733.5648627	0	0	1391.394405	3590.770281	0	0	2207.243294	0	0	0	0	0	1566.991393	0	0	0	0	0	0	1132.490176	0	0	0	1566.991393	0	0	1030.132308	0	2384.444416	2224.992936	1372.277867	1032.906382	1426.347747	0	2102.457108	2539.535548	1242.113322	1467.94534	0	0	0	0	0	0
PI(16:0/18:0)	5770.605131	2861.052389	1846.614334	1619.559828	3898.897839	1497.444475	6849.408595	2195.921336	1820.304627	1028.063051	3088.520585	4523.458276	2985.490491	4893.623504	2146.252822	2083.252833	3748.441814	2188.222459	708.9618312	3518.252289	0	1490.376962	3532.908869	2816.428709	1596.725448	1665.593326	0	3579.85533	2188.222459	1688.905077	2150.610122	0	0	3111.751049	4564.54548	2081.174843	951.161893	0	0	2241.816305	3633.720276	941.8970601	3403.017859	1602.744311	2229.474394	0	3258.380123	1537.522131	1917.98893
PI(16:0/18:1)	6747.275345	4639.260289	4168.933068	1626.378067	13693.40752	5047.476933	5517.840615	6049.818154	4053.891101	0	1282.965193	2351.282401	1673.858838	5823.465436	4267.521134	2379.287185	0	1620.535891	2491.311874	0	1984.485551	2509.681178	3613.77347	1526.43472	8929.664996	0	0	2459.206087	1620.535891	1518.924555	1244.366052	2758.183976	2632.763671	8041.792591	1547.463992	8787.227809	3822.662026	4896.955051	3492.764711	5313.660154	10749.6795	9996.582873	12718.65093	3364.066221	1466.621176	6539.742929	799.4058472	1000.860646	1505.010343
PI(16:0/18:2)	5406.067635	3400.627338	10622.8337	5542.560794	10902.13158	7696.594454	2517.204062	6950.127783	14343.37633	4535.828714	1564.898024	5414.532378	3764.36069	7985.541341	4319.793978	1400.126721	0	3086.006684	2329.251401	4894.494871	2251.931915	2769.188081	1384.26925	823.7149467	6477.454296	629.1684431	5439.185461	932.1766287	3086.006684	1946.152485	2056.059381	6782.673329	1420.750886	4046.694685	7773.134014	4549.708619	4040.834736	10548.79037	1957.839688	15687.49495	29905.39059	8076.453477	10337.85444	8051.349292	5746.445098	7013.464705	2857.449433	2075.217868	1553.905621
PI(16:0/18:3)	562106.7289	962700.6186	145054.5574	413676.5185	519118.678	254339.3125	494822.9914	259340.928	639046.9688	33596.17208	254174.3958	238862.3136	214288.7128	287984.0681	284762.9109	196928.1333	391054.6891	662833.0513	398567.1946	196471.6221	112274.7015	88189.00701	398587.5298	325754.0385	194163.7129	426204.2113	64945.12977	1292476.836	662833.0513	302215.191	269649.5239	303962.8972	32563.90333	416364.3072	632872.2169	631259.0005	316472.7406	716250.5293	46509.86778	476394.1634	817934.4994	179987.5605	1033937.444	154696.7241	377272.1509	60488.90394	211423.8904	336063.9032	263851.4423
PI(16:0/20:1)	0	0	0	0	0	0	0	0	0	0	0	0	1518.17718	0	955.6227467	0	0	1041.035831	982.9131283	0	0	0	0	0	0	0	0	0	1041.035831	0	0	0	0	0	1052.829189	0	0	0	0	0	0	0	2092.826167	0	0	0	0	0	0
PI(16:0/20:2)	765.5874504	1053.259437	0	2086.032078	1572.402301	0	0	0	0	1044.819398	0	1041.905742	0	1539.502168	1047.891703	1835.038885	0	0	0	0	0	0	0	0	0	0	0	0	0	0	1005.938575	0	0	1043.339016	0	0	1027.355648	0	0	0	0	0	2950.993901	0	1052.749926	0	0	0	0
PI(16:0/20:3)	2643.893737	0	390.3562438	0	0	291.2971504	260.5332226	0	0	0	0	0	0	0	0	0	0	0	1566.527954	1045.368216	0	0	0	330.6049495	261.4435613	0	0	0	0	0	949.0978802	0	0	0	1141.560288	0	0	0	383.0552308	319.9216379	3015.697515	404.3463963	0	278.5418349	415.5168205	0	389.6235923	0	250.4357488
PI(16:0/20:4)	4918.244224	18382.3035	7366.248484	4320.420072	10399.56326	8380.529935	7928.592591	16613.57237	11898.96957	1610.418695	1897.606156	2566.420523	5024.546722	7499.920885	2682.785904	2539.772964	1042.61047	3563.347934	4351.337646	2413.453813	1059.848755	1404.716592	5879.156024	2125.266733	17697.27718	5428.808219	2615.378287	1582.711373	3563.347934	1914.775151	4429.457983	12798.2405	3992.34683	4814.783792	8149.630437	3557.848595	10581.82891	7038.537973	4104.782218	25969.01363	20637.55286	8049.343789	17625.12296	6957.891492	3826.840486	2875.15617	6086.171003	2293.512186	2215.314042
PI(16:0/20:5)	0	0	0	1006.03591	0	0	0	0	0	0	0	0	0	0	0	0	1028.310946	0	0	0	0	0	0	0	0	0	0	0	0	0	0	0	0	0	0	0	0	0	938.0981992	1575.292237	0	0	0	0	0	1573.302123	0	0	0
PI(16:0/22:4)	1466.08974	0	0	0	0	0	0	0	938.4092265	0	2079.948519	0	0	0	0	0	1591.017041	0	0	0	0	0	0	0	0	950.1826698	0	0	0	0	0	798.624859	0	0	0	2605.556152	0	783.5395555	0	1011.039235	0	0	0	0	0	0	998.0507533	0	0
PI(16:0/22:5)	1866.561002	2102.78031	0	1564.072779	2139.282182	0	1568.774769	1433.049655	0	0	0	0	1021.106967	0	0	0	0	0	0	847.4201623	0	0	1046.656501	0	2613.618072	0	0	719.7204815	0	1571.499428	1030.712421	1740.177466	1038.438674	1044.585715	0	0	2034.149858	0	2102.763373	2050.555181	1952.018022	2069.65604	2994.161115	2072.414335	0	0	1037.487228	0	1450.320189
PI(16:0/22:6)	2615.975724	0	0	0	0	0	0	1414.765871	1049.412509	0	0	0	0	1560.517487	0	955.5435265	1447.692273	0	0	1541.808306	1425.998312	0	0	1057.149525	0	0	1054.404592	1625.501712	0	0	0	1344.589565	0	0	2630.86932	0	0	0	0	2597.706751	2535.866933	0	0	0	2085.076882	0	0	0	0
PI(18:0/14:0)	0	320.6180393	0	443.499666	0	318.1759531	0	0	622.0154141	0	0	419.0003177	0	659.1719384	0	0	394.7770505	0	0	0	0	0	0	0	0	0	0	0	0	0	293.4183967	0	0	0	0	231.4660494	0	319.8743042	0	236.554424	529.1560097	0	370.8522536	348.6459849	0	0	0	0	0
PI(18:0/16:1)	1393.325295	1534.335681	0	1051.985193	1558.051109	1039.831439	0	3105.5189	1695.155413	0	1055.560556	1041.896521	2099.182286	0	0	0	0	1550.699821	0	1494.902215	2006.642644	1574.526236	0	0	3588.167153	0	0	0	1550.699821	0	0	0	0	2083.64953	0	1444.688289	999.3899889	1696.318919	1054.53764	4702.004923	1795.89943	2704.599511	1577.773964	0	0	0	1049.604717	0	0
PI(18:0/18:0)	2884.859995	10959.52329	10565.54482	1555.364901	4506.509797	3412.315588	5036.247923	1994.416692	2411.242435	0	3439.485466	4158.302068	11162.2154	2263.264453	2696.902888	2019.254543	3527.941674	2592.189884	0	1181.936552	1500.764285	1015.035871	6556.463615	2549.925705	4339.449273	3123.905256	3093.806742	2995.026041	2592.189884	1988.063861	2497.817104	1680.631527	1041.564019	2987.211995	13193.11461	6950.224143	2809.40679	12620.17756	0	6936.488672	3610.173841	7611.116434	1318.423885	5711.477639	2479.881207	0	7734.898296	2316.989085	3437.28713
PI(18:0/18:1)	1890.699306	4407.251652	3972.925037	7015.617816	5580.901649	2564.258888	4205.045625	5862.522029	4342.644734	1016.905209	3451.253213	2938.511517	4651.190118	901.0132932	3101.448407	2491.946014	841.0380435	1273.927497	2373.737047	0	1318.538932	1967.960279	1503.522373	1517.772261	5926.783131	3269.293299	2619.687601	1816.110051	1273.927497	1512.824681	0	4743.200437	4719.938482	4123.996931	7908.987793	3631.196858	3641.972535	7158.594483	1516.77115	6003.370562	13675.37637	4237.801825	4071.65421	9743.011859	3514.501638	1925.104223	5136.449554	0	1549.537796
PI(18:0/18:2)	7253.462756	10365.26831	10196.51274	6133.801595	21764.97829	1811.534698	13787.1049	17568.918	19891.92269	2874.285867	6805.177713	9562.594001	12233.20499	10797.11636	15905.43467	4761.190754	0	2931.760189	1586.553935	6068.951327	3379.287706	3950.029391	10170.77258	3711.613347	4554.997539	22713.01439	6840.3998	0	2931.760189	2913.761946	808.5470434	8966.030398	1075.861485	11411.47591	8284.801058	9846.03185	23967.69557	29072.40045	5661.209743	19138.1546	11037.22363	30375.75658	35826.80193	1973.592566	10110.84868	8274.517975	27033.1731	4196.838	945.9587445
PI(18:0/18:3)	0	0	0	0	0	0	0	1042.96217	0	0	0	0	0	0	0	0	1490.530302	0	1041.310249	1038.162278	0	0	0	0	1419.959895	0	1053.501693	0	0	1514.583842	0	0	0	942.850751	0	0	0	0	0	1438.720088	2103.880627	1053.52292	0	0	0	1053.772494	0	0	0
PI(18:0/20:0)	709743.3682	698305.7677	324231.2561	269792.1365	744868.8511	562801.9646	639269.2359	701744.8876	479258.6	9500.447503	519706.9975	605369.2793	479699.4108	531747.7519	171301.2049	337863.9197	764014.9965	725973.6314	312743.0431	322515.3677	138901.5945	80538.90684	336026.1345	437838.7313	506299.0188	516728.3162	124533.3257	784054.9685	725973.6314	342261.5342	448258.7048	496240.3948	36664.78675	413023.4815	288865.8746	553909.2789	477121.3861	521463.4502	28537.5489	774259.1871	600441.3665	443753.6113	419594.4346	301489.1045	570560.9383	10839.59582	419307.8821	462738.6006	352164.2289
PI(18:0/20:1)	0	0	0	0	1049.517764	0	0	0	602.7781375	0	0	0	0	0	0	0	0	1079.350174	0	1039.910114	0	0	0	0	0	0	0	0	1079.350174	0	0	0	0	0	0	0	0	0	0	0	0	0	0	0	0	0	0	0	0
PI(18:0/20:2)	1586.776058	0	1573.611384	0	2399.192757	0	0	0	0	0	0	0	0	0	1571.199519	2581.210103	1000.34414	0	0	0	0	1552.26217	0	0	1928.532045	1411.145315	0	0	0	0	0	0	0	1854.94332	0	0	2010.25877	0	0	0	1798.921257	2078.266917	0	0	2605.327962	0	0	0	0
PI(18:0/20:3)	26227.68983	21943.36041	5353.659254	14005.48018	15667.82493	9832.191425	5493.253358	4685.164212	2218.219124	2037.328009	3147.487379	1911.422657	4434.325071	5113.988672	4297.116329	4507.734628	1438.985347	0	925.6023339	5566.473019	0	4014.287955	2602.758594	1426.510238	9588.60106	7083.509171	4187.782608	1816.024978	0	1236.527183	2620.251814	6407.634905	4276.187832	6971.488027	7490.123472	7148.206716	17335.38895	7514.856255	2469.472919	13631.07103	34412.16269	6063.593039	11802.47496	3139.350888	7443.666604	2293.678186	2942.230226	0	4172.925925
PI(18:0/20:4)	30978.34769	55250.30868	26235.78542	87910.21056	193979.9137	91991.63532	95994.23436	85925.13115	35206.06158	18259.91715	12646.58796	46461.87314	67358.68034	44627.1513	77500.58718	12931.43468	4468.171992	9953.128485	6086.586948	16446.04357	5838.830845	4052.621253	16184.66482	11013.96248	352637.2133	40006.75078	32808.69366	4526.871127	9953.128485	4280.256633	4934.827094	19776.96569	32797.81028	29258.63917	54397.79469	59413.07774	134022.7529	24949.00644	17334.58132	61050.54677	89326.82156	124777.2158	76046.2446	118231.1822	33167.8007	11163.97803	27154.1039	2561.037542	14009.00397
PI(18:0/20:5)	201.0778514	368.1639283	204.1812163	0	0	0	0	0	252.2133592	0	0	0	0	272.2070282	226.1234374	295.3814905	255.8243608	319.4236165	0	0	0	0	268.8841848	0	0	233.8266708	0	0	319.4236165	0	0	0	0	0	0	1395.152127	0	600.6962515	0	0	312.5353949	245.890219	354.6149111	0	0	0	975.9646106	0	575.0523319
PI(18:0/22:4)	1474.772316	2517.559757	1573.680785	1559.665187	0	2924.817222	1038.537292	1212.140908	0	0	1548.061075	0	1366.847232	0	1250.032474	2792.529829	0	0	1293.159956	0	0	1470.629134	1027.806851	0	0	2051.334616	0	0	0	0	1552.099353	0	1043.488445	2057.462691	2588.837077	1851.292094	1316.121844	1563.600219	0	2377.981755	2094.071291	0	3110.658611	1904.040327	1042.143335	1010.172916	1042.335289	0	0
PI(18:0/22:5)	1458.494244	2130.937091	1386.90887	0	1460.524107	0	0	1027.711602	0	0	937.9243748	0	3115.162649	2594.554413	1011.225611	0	1057.467235	3788.379527	0	1051.92004	1020.179943	0	2236.019748	1053.948587	3941.880448	1316.348895	0	0	3788.379527	1563.503947	973.1309291	0	0	0	2657.451151	0	1009.856949	1512.117716	0	3195.028649	778.5338104	0	1280.944492	2830.064305	0	0	1573.894258	0	0
PI(18:0/22:6)	2432.891004	3129.25656	2096.013405	1052.797872	2873.485698	1181.31119	3655.283112	1753.387203	1445.237191	0	0	1565.368392	2812.334763	2224.489565	0	0	0	0	0	994.5888214	0	0	1879.325039	1019.343412	1514.481177	0	1541.161024	0	0	0	0	0	0	1322.906014	0	1026.897891	0	1313.128024	0	4360.335766	3197.920511	3328.351031	7903.706178	3981.214075	2043.68618	1027.791965	0	0	0
PI(18:1/16:1)	1073.218065	2511.896628	1289.607754	2121.598224	1927.441056	1010.034789	2688.903458	1432.890992	2467.167314	0	1144.099263	1181.779709	0	2326.122662	1049.517764	1037.889698	843.6440318	0	1859.788195	0	0	0	917.0190653	1049.656444	1564.084904	747.6667572	0	1624.890398	0	1021.264585	751.1873152	0	996.748681	2434.699285	1021.182061	1842.566521	0	2663.005381	1449.197869	3895.114958	1040.620098	1272.046659	3149.618458	742.2959989	942.8495241	0	906.6729685	0	1961.208796
PI(18:1/18:1)	2042.901809	3742.256834	2975.936308	5392.470553	8383.027398	2151.191961	3570.079858	3080.060534	3159.465626	0	2603.093055	4301.527175	2270.729261	6259.653754	3867.702883	1447.256508	1026.656036	715.7574884	0	0	2947.055541	2451.899091	3681.824165	2082.205596	14488.78459	1545.438851	2608.886002	0	715.7574884	0	0	3072.857327	1394.349881	5161.879633	6120.285542	7188.084747	5576.579408	2712.256556	0	5753.66996	3860.731301	3204.194769	4087.681769	4932.964691	2614.274989	2101.590902	1635.826685	0	0
PI(18:1/18:2)	3731.980662	7022.51468	1071.76606	2420.310816	2970.300884	0	10614.74656	1267.099847	2891.87358	0	0	2840.102011	1305.10318	3190.356905	3114.265306	3649.867355	2176.426557	2919.16871	2600.613573	2166.81087	1731.075264	2435.00946	3918.298826	2362.771679	5481.176757	2647.322295	1917.795497	1904.62385	2919.16871	3118.113623	2592.329359	2041.594265	3762.255626	3585.247768	4560.222456	7072.848651	6732.907128	8753.377205	0	4433.617332	3690.985162	2705.3868	5813.338486	2754.964418	2354.681537	5178.528732	2821.952422	0	3233.195102
PI(18:1/18:3)	0	1518.882451	354.7345892	1314.094915	0	685.3912207	0	0	845.0362785	0	0	0	0	333.1654468	0	0	0	0	0	0	0	0	0	0	0	0	0	0	0	191.096326	0	372.1417552	0	269.7736809	0	0	0	0	0	0	0	0	0	0	246.7632635	0	0	0	0
PI(18:1/20:1)	0	354.4361038	417.7387617	0	0	208.8358595	659.5686632	222.342749	208.6664005	337.0119494	0	248.4032297	0	0	0	0	0	0	197.6225663	0	345.9541544	0	0	0	0	0	244.5140911	0	0	0	292.4886415	0	0	0	352.4949859	0	427.3012884	0	0	222.3458858	0	0	387.9362999	0	0	0	0	0	0
PI(18:1/20:2)	0	0	0	221.7972507	0	0	0	0	0	0	0	646.0379637	226.7000437	0	215.2450725	1049.609262	0	0	0	161.3841003	0	201.8969805	0	0	0	235.0370007	0	941.5643266	0	230.6695634	205.6094663	0	0	0	486.6712752	0	793.6368974	237.9013871	0	605.5598344	231.7971843	0	0	0	356.4756977	0	0	0	0
PI(18:1/20:3)	4122.316181	5572.324067	2892.460022	3835.816732	3630.090922	6512.544699	3975.294289	3869.130552	4321.306062	1183.092233	4303.122112	7672.899179	5418.79395	3276.868069	3408.489766	1643.508733	2453.29923	1325.1096	2492.459427	4746.432117	2971.0817	2187.277102	1659.497371	1461.225074	4254.703316	2479.730504	1306.271927	2048.614281	1325.1096	3116.37552	1870.258443	7443.902149	1710.380952	3480.645674	7261.052354	2452.066232	7828.308997	6146.040251	734.0946505	3859.521828	6781.586156	3296.073439	4421.999426	2802.248475	5216.113372	1705.223477	8451.345525	5173.872899	6297.720901
PI(18:1/20:4)	7072.429055	4038.973254	1892.0219	7125.948121	3307.902168	4318.785394	7023.512735	2843.728701	4231.199636	0	4763.01663	5893.609208	10234.0278	3009.962263	4252.91779	2240.446649	2964.092939	1993.047621	2481.762668	3840.645366	2468.93133	2572.62532	3113.375946	3135.957916	11875.963	5707.103616	2523.968317	2896.449269	1993.047621	3465.426253	8872.253354	7765.246338	2041.980721	4968.088913	7244.646239	5805.581818	4592.293503	8435.650556	1645.786999	6416.275008	7516.573688	11277.30112	14572.59677	4828.971832	7996.181079	1226.272782	3400.417734	3857.598484	1321.988002
PI(18:1/20:5)	183.6400668	198.9591724	0	379.2677143	0	0	0	189.3745437	169.5487765	0	0	288.1451788	163.6789139	0	375.0507685	0	332.4597245	602.5216343	0	0	0	0	317.5842656	193.2662487	0	0	0	680.673801	602.5216343	377.0244258	0	0	0	642.8763101	321.3170563	321.1684754	0	293.8353038	0	287.1030406	399.9555615	0	278.5358051	190.9340888	318.9947569	252.8738551	0	0	245.0861768
PI(18:1/22:4)	0	2371.242021	2358.842535	0	0	0	0	1545.203413	2604.651741	0	1532.442079	1512.552941	1924.382799	1902.105569	1535.386547	0	975.496283	0	1580.766881	0	0	0	1076.790355	1039.38756	4084.343353	2099.071376	0	1625.284127	0	2492.476074	930.5377894	0	0	0	2584.986547	0	1479.051126	994.3163382	0	0	1491.261757	0	0	0	0	0	0	1023.375596	1023.893771
PI(18:1/22:5)	1049.267437	1705.165432	1572.929792	2055.68457	2084.885511	1283.790381	2147.590163	1410.480058	2019.696594	0	1393.453491	951.1881684	836.5708892	2576.582219	1591.373907	0	177.918733	1668.513809	948.2323068	987.0664729	0	0	1105.644242	1396.248274	996.5210103	954.7376681	0	0	1668.513809	1316.882437	733.4602978	2661.029124	0	2342.703734	2438.305625	909.1937494	1850.286057	1604.546266	0	2138.049958	1192.457796	1003.482194	856.6220638	2444.373765	1587.777993	0	2559.275104	833.942895	2382.821798
PI(18:1/22:6)	0	2909.338147	1955.466244	1381.772967	1261.996944	2835.607251	1977.01691	5300.582326	1117.47326	0	1404.519291	1977.345646	1923.59967	0	0	0	2010.963254	1152.857665	2496.672979	1391.530072	2387.661863	0	1034.530621	2175.170877	2510.98055	880.6380177	0	3446.801797	1152.857665	912.5730293	1110.236997	0	0	2240.316956	4656.421581	1247.791258	1946.757449	3060.982667	0	2086.026549	3996.393273	0	2158.696584	1587.45266	3375.639272	0	2124.935703	0	894.032614
PI(18:2/16:1)	129060.4909	229384.7747	116674.6598	253622.6802	197364.0701	163603.072	274808.7166	161569.0075	94694.85396	9886.852465	95889.11412	297437.9414	213814.4788	257516.3656	163984.4491	108208.7682	178002.656	195451.2235	235604.231	152474.7258	64519.96808	40174.77272	154384.9394	178602.3563	209263.1296	272131.0088	111793.6082	271086.1249	195451.2235	148589.3853	183804.9545	155787.8925	19463.40221	182991.2394	303943.8089	277919.872	302578.7635	351211.1823	27176.2229	235890.2553	293900.244	178653.0925	325148.5408	197138.9139	236934.2252	29824.29581	219153.6865	170248.6596	154024.3481
PI(18:2/18:2)	694.833121	15021.77752	2951.572073	8624.380661	2904.3247	2340.288371	9555.542458	3521.538172	2278.331702	1514.55064	2495.91958	4042.355426	13297.19412	3402.069772	8448.297677	0	3326.059991	7750.721992	1325.828372	997.4435536	1273.421626	2243.407087	3238.157605	5786.334516	9839.822743	6511.587456	0	5229.939276	7750.721992	5504.188598	4755.879541	2335.655029	2503.623413	6078.596651	7525.17596	3720.77327	8405.825191	20972.20474	0	4431.159965	13085.40097	2385.560514	11054.76005	7087.130227	5579.781871	2510.913082	6211.428233	505.4437378	6414.052724
PI(18:2/18:3)	0	294.9399882	0	0	0	0	252.3776622	0	0	0	0	0	163.7011612	0	0	0	0	318.2557152	0	316.2029015	0	0	303.3862709	0	493.8397364	308.6201866	0	0	318.2557152	0	0	0	0	0	285.0217055	0	0	195.829495	0	336.2342227	496.2884976	0	195.8188281	0	0	0	243.8442398	0	207.6351057
PI(18:2/20:1)	0	0	0	0	0	0	0	0	0	0	0	0	0	0	0	0	0	0	232.0381436	144.7716596	0	0	0	493.8369144	0	0	0	416.6971463	0	0	0	0	0	0	0	196.6756907	0	188.2621833	0	0	0	460.4173167	304.4341681	0	0	0	0	0	0
PI(18:2/20:2)	212.1338873	0	0	0	160.4981436	0	0	316.784049	338.6846197	0	0	0	0	0	0	0	361.8381659	0	0	0	0	223.1188447	0	0	0	0	0	0	0	268.1000949	320.8920151	187.4953102	0	453.9157367	0	0	0	442.8218842	0	0	0	248.6600952	245.8480196	0	326.0168692	332.834576	173.3160139	0	337.2101684
PI(18:2/20:3)	1543.434316	2031.015562	556.6464263	756.8618257	1339.221923	2470.982917	803.616043	1227.067715	1122.194885	1356.556292	2028.305738	753.6607741	2032.251818	2657.218367	809.3920704	2353.930177	2016.96346	858.007012	1409.033765	1794.191749	952.3057832	1255.311432	2682.973844	2347.82296	473.3667135	3662.060788	1120.548952	2862.472336	858.007012	2627.832338	1778.564155	0	1127.086511	972.3746586	829.2838355	590.5925208	999.1995615	1226.314208	697.413069	1347.698661	1594.716806	1339.535849	2776.542366	804.2197535	1890.717464	544.1649555	1918.565233	2260.977501	1869.209351
PI(18:2/20:4)	10711.70999	14609.52571	12471.8872	67732.62606	22221.53846	10620.42744	13768.61962	20046.1818	15340.82331	0	12046.78635	16980.75211	17461.34987	17146.78269	13196.4182	9731.091804	13493.35095	8569.188183	22453.19999	15481.70784	2160.830462	1400.904361	15306.57949	19183.14616	12316.81755	28970.17542	7479.295126	31647.02879	8569.188183	26878.93766	13261.44387	9709.123252	1493.852751	31343.95613	67573.4405	19741.23871	17223.35975	17794.24609	3730.002833	10311.15668	27855.63541	16499.03188	17310.16961	12890.25729	15434.6963	0	10072.19323	5637.103004	7769.497703
PI(18:2/20:5)	577.1321567	0	0	0	0	0	0	0	0	0	0	0	0	0	0	0	0	1221.847428	755.7220303	0	0	0	0	318.9001883	0	0	0	876.6259623	1221.847428	0	0	0	0	0	0	0	0	0	0	444.3321962	0	387.7033521	267.4493591	730.3055484	0	347.7644199	0	0	0
PI(18:2/22:4)	0	0	0	0	0	0	0	572.5187932	0	0	1081.115412	0	0	0	0	901.0498219	880.0582758	0	1997.069804	0	0	0	0	0	0	0	888.3302432	0	0	1401.122642	651.4596571	0	0	0	0	0	580.9017911	0	0	0	0	0	0	0	0	0	0	1448.266092	0
PI(18:2/22:5)	2445.382202	1352.295385	1074.698177	574.3948881	1057.30694	2194.214723	822.5801448	2408.790152	1790.782095	250.5084738	1578.637849	0	549.3505158	840.8920189	841.4589185	1070.739486	1819.791214	1379.228584	1223.523576	669.6404327	0	1598.009426	600.7227114	1074.963023	980.868694	626.619075	188.5106453	1462.252396	1379.228584	623.3180722	1133.954175	1254.55507	184.8252666	1359.250706	0	374.2271318	538.6664937	1172.517141	904.2517069	894.5116495	188.3322492	0	1210.053099	425.2226303	1788.410623	959.1218057	1018.89805	557.1894197	718.4222113
PI(18:2/22:6)	890.5178234	1162.654328	0	2418.552909	1161.813528	1537.499824	1859.542013	1922.75571	0	0	2248.942247	4378.841079	1612.798318	3110.685727	1098.411129	894.6493031	865.7352946	1723.444359	833.1717083	1390.132432	0	0	1417.768771	836.2483782	0	1138.172942	1864.767841	4027.68416	1723.444359	0	831.6923232	1530.047796	0	3363.122733	3537.76987	1820.75759	1370.898282	1866.12268	0	3023.3982	2193.459763	551.6517776	2716.91956	603.8153665	1931.95851	0	0	0	1128.68031
PI(20:0/16:1)	7259.829746	8640.507116	2648.73871	2741.064547	12793.30511	4102.2857	11522.50621	4828.039188	5791.274869	0	4350.875626	8713.28997	6045.297048	6891.980512	3548.039511	1693.241738	6730.021274	5774.178615	1327.140402	2078.879003	1434.273333	2256.286915	4167.945433	4704.220579	5757.393804	4857.232816	1619.803597	9032.349854	5774.178615	6891.35129	4619.849729	1268.983971	544.9649073	5493.074857	3472.0063	4729.259786	5439.720405	7385.068687	1099.523433	9046.60346	10124.46275	4179.630099	1630.474904	1072.803828	3718.830849	822.6291131	3389.450529	4885.120494	4235.953561
PI(20:0/18:1)	46623.99687	95037.29859	32057.24519	23215.8593	72957.55653	52285.93683	77862.06596	44543.3324	43907.88788	1474.321975	36726.46303	86820.79319	47653.70834	55151.45088	26960.67699	41304.45806	62423.76596	44238.66233	41650.6767	40033.10222	16990.73485	8211.338879	41268.76822	45693.83428	63246.43599	50076.49927	15167.9375	73550.20519	44238.66233	41294.81741	48591.80048	23392.96843	4864.125836	65542.13337	29007.48439	61297.2431	63522.75335	67139.71883	3699.806436	88742.24409	88610.58809	48487.64728	41439.27666	30924.6955	38849.89839	1355.668447	78265.10496	36758.03863	33332.96153
PI(20:0/18:2)	15400.78	20218.25641	2459.325704	12298.52773	20472.99556	9157.072464	35797.74348	8066.728871	3983.665309	0	4093.136596	19902.13183	13056.24046	10669.15908	8081.431115	4638.82739	11638.44553	14008.86744	9131.895256	6122.158382	3630.222484	3333.750301	9913.949776	13503.39811	10872.52488	12991.27229	6121.045713	23602.77637	14008.86744	6452.380692	11536.94911	9760.032983	1453.93829	15201.62064	9971.659275	14098.49169	15005.37755	35663.51474	0	15037.18296	23735.3879	8065.302719	14981.35778	4857.025438	9061.912916	1342.194641	8869.297735	6065.070399	7837.273872
PI(20:0/18:3)	868.7411894	592.0099157	582.1033115	0	0	0	1242.835958	0	0	0	0	0	0	0	0	558.2316699	0	0	0	0	0	0	0	0	0	0	0	1177.078291	0	0	0	0	0	543.8029091	0	0	0	0	0	0	0	0	0	590.6429941	549.2300439	0	0	0	0
PI(20:0/20:1)	3557.948217	5656.916951	2618.68122	1152.739358	2895.910331	7185.922904	3638.810307	3433.346153	0	0	2665.560239	5823.960544	5162.814617	2901.710579	1917.695326	0	3519.141503	1732.779537	2283.496407	1391.896626	865.733051	0	4450.396031	3458.466278	4445.472945	3892.153005	1310.135548	5882.471392	1732.779537	4205.654146	3418.83973	0	0	5106.816049	1254.474341	3476.767094	4309.44096	2958.280306	0	3032.475447	7423.399882	1154.678863	2279.175007	6202.645334	3294.606299	0	5938.926333	3061.911205	1227.826324
PI(20:0/20:2)	898.4154855	2827.278556	590.5603157	1105.499952	1611.700025	1244.769955	5342.535054	3032.194104	1147.169992	0	0	5596.451599	2336.533258	0	2491.305033	901.0498219	1736.280875	1154.507693	2791.176763	0	834.9436348	0	2259.967345	1949.670904	3470.207372	2708.985056	0	2317.84749	1154.507693	1171.666763	1110.786018	1058.204148	0	550.2192316	1125.534748	1802.745373	1824.517003	4201.190189	0	1371.908871	2759.92524	553.4048426	733.0854624	1851.557697	1110.003585	0	1058.599445	0	598.0097473
PI(20:0/20:3)	2124.443496	3213.697147	0	1387.912905	2277.974944	0	2530.989499	1971.39694	1792.825128	0	1789.851304	1372.955474	1806.922839	1419.144434	0	1230.941354	6097.35772	4393.267992	954.7208109	1679.758432	845.7462278	0	971.6501574	1858.094178	1274.598958	4262.324006	2255.316765	0	4393.267992	3899.818721	3913.964672	2160.197654	0	1416.190061	3542.554534	929.4690523	2257.325298	1317.254354	635.4965355	2557.235317	1925.616406	847.2816382	1337.228147	0	2031.740156	1310.923546	746.9518651	746.8019384	2301.929637
PI(20:0/20:4)	12727.53828	17037.49451	4457.154699	7894.377398	12657.46811	4930.783003	12912.84326	3350.703158	2803.398302	0	4847.235971	2951.327974	7827.990028	6849.69066	7074.614775	2734.915523	4859.640702	5271.039477	3692.259452	7808.535458	1328.994201	0	4129.087013	4855.82931	6780.371147	5727.879973	1802.812966	8258.271605	5271.039477	3626.958604	5882.587035	6006.532535	0	6202.604716	6424.898183	9937.803937	6356.386979	9880.040994	0	15357.30697	3551.922718	4004.379681	3379.864413	0	2206.813253	0	4334.819626	3633.408875	3742.188691
PI(20:0/20:5)	0	0	0	0	0	0	983.7172973	0	0	0	0	0	0	0	0	0	0	0	0	0	0	0	0	0	0	0	0	0	0	0	554.6514433	0	555.3018658	547.9781046	559.8457369	0	0	0	0	0	1328.24525	577.3555755	0	0	0	0	629.7180219	0	0
PI(20:0/22:5)	804.0444688	558.4842392	0	610.7153772	0	0	1863.234021	1209.569156	1086.051852	0	637.637382	0	0	911.1772143	0	0	1186.006769	0	0	0	0	0	545.2183481	2446.473524	733.808254	0	0	0	0	0	1160.233046	0	0	0	0	784.0237634	0	534.3526395	0	0	0	1079.124729	1133.844574	0	739.0234165	0	1631.853067	0	0
PI(20:0/22:6)	0	0	0	1417.838375	0	0	0	0	0	0	0	0	0	0	0	0	904.494753	577.8499305	0	665.1068306	0	0	0	0	0	802.3684701	0	0	577.8499305	0	0	0	0	0	0	545.5584943	535.5075527	911.1951912	0	0	0	0	1110.681902	0	0	0	0	585.3919757	0
PS(14:0/14:0)	0	0	0	0	0	0	0	0	0	0	0	0	0	0	0	0	0	0	0	0	0	0	853.9174415	0	0	0	0	605.6809749	0	0	1132.839916	0	0	589.1150225	0	0	0	0	0	0	0	0	0	0	0	0	0	854.3858381	0
PS(14:0/18:1)	1041.271109	871.2023222	841.5599311	0	0	846.6732765	561.3728844	512.1740979	794.4530916	835.9723326	441.3037861	175.9525329	0	0	0	1458.660615	1528.770044	3633.833287	481.8803951	0	498.3769051	0	0	194.5739312	689.6682279	0	132.8579651	834.6807674	3633.833287	0	985.6279689	809.5501495	0	1061.449318	654.46789	461.1242351	0	524.2509777	160.706778	247.3470663	793.8408249	635.0800477	0	538.9414138	0	0	556.9716968	814.4923762	756.9758001
PS(14:0/18:2)	1845.391831	6084.030395	849.5571663	2068.556123	3994.185089	2277.274326	2636.980361	1178.572458	1707.864258	0	2060.966316	3172.322626	851.7202474	852.6793165	2555.329908	2912.473884	2121.442175	1803.630937	3831.906674	1196.587955	582.4239551	0	2924.097264	1825.014098	2873.254104	3208.569015	0	2315.235411	1803.630937	0	3248.347294	2890.666226	0	1727.284909	5033.634526	6388.012422	3536.533414	12213.66536	0	2048.422619	7964.647738	886.9406413	6077.140554	1631.680814	2949.386035	0	3803.289015	2912.531716	6569.112208
PS(14:0/18:3)	711.802317	0	0	0	0	0	0	0	0	0	0	0	0	0	0	0	0	1181.015088	0	0	0	0	523.0224044	0	0	0	0	1195.15801	1181.015088	0	227.7636854	0	549.9885007	0	0	0	0	0	0	0	0	0	533.7382699	0	0	0	0	0	0
PS(14:0/20:1)	0	0	0	0	0	0	0	0	0	0	0	1830.956819	0	0	1077.975018	0	626.1648566	0	0	0	0	0	0	0	0	0	0	589.6494566	0	0	0	0	0	0	0	0	0	0	0	0	0	0	1452.998865	0	0	0	0	0	0
PS(14:0/20:2)	785.4783871	586.4273718	0	0	959.9765821	0	0	0	0	887.701856	0	0	0	0	0	0	1180.804749	0	0	0	0	0	0	0	0	0	0	307.1823984	0	587.6930781	0	0	0	0	593.119857	0	0	0	0	0	0	0	0	0	0	0	586.4917542	0	0
PS(14:0/20:3)	0	0	0	0	0	0	0	0	0	0	0	0	0	1375.511907	0	1393.342373	1577.29243	0	1511.518971	0	0	0	0	0	0	1012.316425	0	468.9788873	0	0	1038.992988	2060.139181	1012.187697	912.3097847	0	2874.166494	1008.323909	2043.799199	0	1015.518241	0	0	0	2023.091024	0	0	0	0	1020.201254
PS(14:0/20:4)	4372.561821	6984.523604	7273.655798	5775.838898	7203.765083	3799.326139	13100.97132	5371.769657	10186.45502	0	7158.590495	4478.361005	11572.18384	5974.167593	4114.368206	5535.838996	4182.076148	7299.096936	7338.774983	0	4047.979938	7052.422226	7971.868766	6297.099151	10223.08835	3031.768313	0	8245.684411	7299.096936	16928.84761	11043.50018	2420.786346	3632.29689	5603.72966	11083.03993	9592.424027	5981.284875	5057.730212	3034.681425	8851.654454	5570.119144	9903.533607	3478.513977	4132.770869	2389.670364	3861.786217	7737.034577	4599.766013	9756.809057
PS(14:0/20:5)	2589.187356	5732.863079	0	1013.902592	0	0	2067.959574	0	2620.645623	0	1041.64283	2073.799818	1570.66114	1049.122943	2091.750897	0	1568.332284	0	2514.03523	0	0	0	0	1549.527031	1554.048674	1720.261745	0	2097.925527	0	0	1510.575228	0	0	1042.869912	0	0	0	2060.792396	0	0	2037.819041	1012.949096	0	0	0	0	1039.700658	1026.976318	1561.311105
PS(14:0/22:4)	3145.002015	2483.41317	2584.578986	0	0	0	1550.646535	1405.211873	1953.166187	0	1557.779199	0	1540.400729	0	3617.448592	0	3136.811455	1044.518903	0	0	0	0	1762.704611	1521.616603	1555.655984	1072.725384	0	4181.227367	1044.518903	0	0	0	0	1519.278725	3465.317826	2565.327623	3547.632679	2055.023644	0	1022.626826	2061.628464	4063.765124	0	0	0	1002.427083	2594.713906	0	1511.327088
PS(14:0/22:5)	6385.739414	0	370.4237931	450.6690324	1274.206348	374.8773178	1062.496724	413.0447512	209.151467	0	442.5186455	0	396.5514707	277.3801964	411.2407301	1330.901598	1407.438214	3185.736838	662.7570992	0	261.3397841	258.2953261	133.1827688	257.9978286	0	223.0656876	0	1937.970038	3185.736838	0	221.3148362	0	0	0	0	0	0	325.0238083	0	0	0	0	0	0	0	0	479.7582273	690.60501	339.0506228
PS(14:0/22:6)	0	993.8376807	1225.340496	2218.043633	0	0	2488.871336	0	956.1817975	0	0	1198.20054	0	0	975.7251957	0	0	0	0	0	0	0	0	0	0	1029.731444	0	0	0	0	0	0	1929.584697	0	0	0	0	1298.314861	0	0	1474.687306	2581.088908	0	2327.808993	2209.167339	0	0	1467.102178	0
PS(16:0/14:0)	0	0	0	0	0	0	0	0	0	0	0	0	0	0	0	0	846.3167024	0	1468.483121	0	0	0	881.3519522	564.336507	528.696564	0	0	0	0	583.7720001	586.7984738	0	0	0	0	0	0	0	0	0	0	0	0	0	1053.034085	0	0	0	0
PS(16:0/16:0)	2385.853267	0	873.1499147	0	0	846.0730948	2247.434051	1296.428504	819.9295197	0	1308.405225	0	849.8843996	1121.748467	0	830.8161496	1190.622132	0	1181.541072	0	0	0	0	0	791.4441017	1042.459365	0	0	0	578.1671264	591.2889864	561.311282	0	1559.371941	522.6829327	0	1726.713898	1287.399302	0	519.5306426	1530.2758	419.7561032	0	0	0	527.1403925	1152.911648	567.8128837	0
PS(16:0/16:1)	0	551.9501923	0	589.086841	0	0	0	590.0005458	0	0	569.046395	0	0	0	0	0	879.1963398	0	0	0	866.2056384	0	586.8448596	1465.616234	0	0	0	0	0	0	0	0	0	0	0	0	0	0	0	0	868.155046	0	0	0	0	0	0	0	0
PS(16:0/18:0)	21061.17609	19385.15084	8719.440589	8632.684991	9762.276646	11291.46053	24919.03184	12166.93448	29679.98891	4189.078309	11024.91892	18296.26544	10842.85674	60831.25224	5708.914168	7026.984389	9431.015029	11416.33189	22369.1933	5601.050806	7303.177689	4696.440728	7794.409394	8291.990254	15543.14263	12748.19355	10455.72807	18314.39875	11416.33189	2596.151818	10002.33739	21204.50126	4059.87573	8524.687626	10691.15698	12030.67963	19797.94658	17205.98082	5748.664206	34786.79816	38655.85302	12892.00812	13424.72459	6090.812722	29986.85387	1042.823366	14262.49413	4112.873324	4066.235556
PS(16:0/18:1)	2061.78292	6814.853339	0	1986.630464	5733.918064	2058.416969	5721.488456	3287.704252	3123.992683	1576.302092	5049.5792	2082.668545	2164.541013	2357.490457	2573.498576	4105.126345	2915.80846	2277.750043	2493.400896	4066.674065	1495.461825	1248.745657	3359.446427	2196.274698	3493.543093	6318.124734	3066.454103	1107.174182	2277.750043	2257.451382	0	1612.879958	1050.04596	1051.15262	3998.894587	5389.853499	2392.309749	12887.85818	0	4057.896079	4035.82481	1545.436864	2617.551338	2634.676334	0	0	2451.792971	1542.051154	3538.665588
PS(16:0/18:2)	4517.357512	2020.913073	4116.406169	3863.34692	1544.405821	992.1384966	2440.721061	2015.172679	2909.610601	2569.386967	0	2528.176791	4815.336697	1992.256746	2545.815226	2022.500703	4681.843493	1408.443091	4182.292484	0	0	1864.425883	2883.366332	1965.590658	3899.715175	1412.698621	1030.763525	3119.540907	1408.443091	0	3156.065901	1569.865458	0	2195.914642	4025.344305	2242.843686	3095.844661	2009.105101	0	0	5438.641931	1493.337746	2034.859737	2013.937773	1532.733812	1514.502123	1873.392315	2026.873606	0
PS(16:0/18:3)	1568.454127	0	0	0	0	0	0	0	846.1342107	0	536.1860878	0	0	0	0	0	0	1103.413159	0	0	555.8799785	0	0	0	0	0	0	1044.523467	1103.413159	588.1839487	0	0	0	0	0	987.3626172	0	0	0	0	0	0	860.9865352	0	1843.563669	0	0	0	0
PS(16:0/20:1)	1234.099936	0	0	0	1458.222147	987.4615789	0	2361.141169	0	0	0	2225.608521	3890.543868	0	0	0	0	1560.712397	1263.359718	0	0	0	0	907.338601	0	1734.159803	1114.644058	1030.923401	1560.712397	0	1207.421832	1926.001263	0	0	817.5503576	0	1113.559898	0	0	0	0	0	0	0	0	0	0	0	1409.795767
PS(16:0/20:2)	0	0	0	0	0	0	0	0	0	0	0	0	0	0	0	0	0	0	0	0	0	0	3059.338973	0	0	0	1215.736045	1051.937156	0	0	0	981.5273226	0	0	0	0	0	0	0	0	0	0	0	0	0	0	0	0	0
PS(16:0/20:3)	0	1879.308988	0	1381.286201	2023.19662	0	3588.127559	1037.077885	0	0	0	1558.274569	0	0	1552.308402	0	1531.272772	0	1044.825098	997.2290765	0	0	1848.74911	1002.618828	1044.856704	0	0	0	0	0	1534.78437	0	0	0	0	1974.292052	993.6325239	2321.069396	0	2853.12136	0	1043.816503	0	1041.966036	0	0	1047.136554	929.2690708	0
PS(16:0/20:4)	19905.31026	22393.41444	6277.644126	8828.440325	9645.063019	6980.764456	12246.89688	7653.367889	4312.170561	1042.668722	3993.808975	9241.511273	18215.28866	9354.278388	8138.312793	2059.125096	13660.73699	3978.874964	12134.29701	7095.017845	4532.826165	3036.70398	8253.978456	2666.293132	9171.730591	13071.92962	2059.618179	8367.9963	3978.874964	9118.014173	6859.875484	2595.1896	1126.409611	6963.561204	19329.17818	19332.29602	9567.638206	14824.81084	0	12585.94636	10836.89315	8006.366103	6223.34942	2083.337046	7819.664851	5203.666915	3086.138469	2766.03641	5740.038046
PS(16:0/20:5)	2299.424888	1533.951996	1547.004161	1408.083474	1561.607368	1912.056704	1540.342237	2547.059618	0	0	1515.128958	0	1550.850832	1016.317649	2080.880675	0	0	0	1564.666906	0	0	0	1403.476334	0	0	1574.503236	917.0462738	3133.800093	0	849.5205869	0	0	0	1550.413635	4155.63613	1498.399211	1019.950409	1380.870721	1455.737069	1550.490541	942.2487793	0	0	0	0	1044.829943	0	0	2575.817921
PS(16:0/22:4)	1447.662621	2375.387021	0	2373.013887	1506.969869	0	0	0	2058.917449	1540.214017	1560.160262	0	1898.995434	0	0	935.0931006	2314.228607	0	0	0	1086.09293	0	2085.717224	0	0	0	0	2570.974673	0	2055.462899	1089.853443	1030.132308	0	0	1067.199442	0	2347.118649	0	0	976.9796255	1020.232032	0	0	0	0	0	1029.2501	1547.267479	1035.088583
PS(16:0/22:5)	1572.410621	2766.378165	1061.618256	0	1637.056443	1017.960792	1236.497498	0	1543.643951	1561.710793	1608.026741	3738.928037	1580.662904	1020.00164	1028.668846	2067.862217	1338.889322	4366.811288	943.979006	0	0	1469.182158	0	998.3759805	3050.144721	0	0	3104.273347	4366.811288	1101.403772	1947.462202	0	0	1522.872877	2145.581194	1710.884718	1533.259155	1910.088772	0	3168.745669	1516.890129	734.7881234	2089.106787	1541.998793	1785.690866	1502.825457	0	979.3769182	1562.121662
PS(16:0/22:6)	2088.763385	0	0	0	0	1200.309777	1730.512018	0	978.8107505	0	1559.360387	0	0	0	955.6830214	0	1454.322299	1895.775151	1856.290476	0	0	0	0	0	1215.638864	0	0	4351.142095	1895.775151	0	1469.759233	0	0	0	0	0	0	0	0	0	0	0	1276.179629	1106.361869	1233.855223	0	0	1028.876404	1015.390005
PS(18:0/14:0)	0	0	3087.186953	909.014524	1545.724992	2058.936443	2571.235552	0	2057.98717	0	1512.753583	0	1542.148731	3567.568353	0	1026.243752	440.7912632	4716.149042	997.4730552	1495.031514	0	996.0142911	0	1000.405459	1016.099255	0	0	2092.012451	4716.149042	996.8677669	1137.202859	1547.566851	0	1016.104739	0	0	0	1501.973946	0	9074.338146	1521.893024	1008.684422	0	2529.931116	2031.385717	0	2062.419474	1536.440136	0
PS(18:0/16:1)	1565.036637	6397.340381	6711.981148	4512.36443	4647.958853	4984.256639	7109.785372	3773.467608	18326.17158	0	7099.780362	1593.930143	2055.299366	4640.648083	1547.400721	0	3884.552184	4514.879123	1991.388691	2008.757703	2037.027026	2018.510206	5617.630999	2506.978586	7645.330923	5458.795266	2452.346165	4180.879141	4514.879123	2506.490819	1505.771843	1950.543628	1027.092541	7322.603542	3050.6976	2557.123151	5140.941328	3863.497067	1039.964062	15056.33991	6891.123163	4887.362908	2610.549383	1036.069819	9944.610637	0	5573.410115	6159.430347	1025.666121
PS(18:0/18:0)	505748.2502	1085389.14	564237.1195	238521.6633	490939.6558	742534.3188	685603.1035	471349.8473	910618.9034	24455.29102	855753.6946	449853.1611	647164.6679	1258779.626	155833.6957	366656.604	899673.1886	1240780.955	272338.4956	493164.5034	394938.6387	123336.76	608965.2015	347426.7462	746354.2021	839468.217	155850.6869	714356.5191	1240780.955	377869.8493	398322.0557	353211.4891	128291.7646	861340.3139	226086.7199	485497.8507	697091.2793	412721.4731	56999.78601	1408939.276	460458.1782	833736.1273	162587.2561	1093285.899	1125843	28291.67976	467508.5733	865117.0652	358362.2561
PS(18:0/18:1)	53652.71646	128782.1872	62236.71784	33753.1675	78959.67015	84653.10156	120139.7814	57421.76435	102308.1096	11973.07357	84039.28669	51769.54719	116133.6553	86585.62028	37240.17898	51085.19522	98462.95861	155413.3936	39750.7343	53735.88727	30366.77713	31346.33395	82435.93676	35843.78607	89332.36607	110316.2809	23419.57801	84215.49308	155413.3936	50280.42317	77430.87541	32008.78098	7299.786041	161118.5728	26587.70114	57405.94521	133676.0148	61836.28028	10411.29222	214837.0427	83014.48462	72131.25565	17157.41982	81288.87296	69537.39766	10425.22571	68300.07949	84380.14547	29251.56297
PS(18:0/18:2)	10985.02766	21065.28204	4581.980965	10045.74894	33147.21577	11920.00617	27638.13853	11212.5333	10993.39973	1040.447318	8855.166356	21755.04373	24063.08389	19313.88518	13475.53082	9118.656359	8227.928565	21691.6989	9690.107256	8296.536902	3833.589596	11207.66316	6836.278501	6166.725782	10424.51638	26143.97774	4160.088586	12655.25596	21691.6989	10197.93385	14783.88805	14124.41751	4147.573801	10960.69875	10480.34304	11899.29375	15298.37926	24322.76804	4161.514469	22269.15673	30612.46726	7764.998396	12595.60486	8164.096525	14991.0087	3065.746222	14382.74888	10543.2254	6800.638785
PS(18:0/18:3)	2224.829006	1319.843172	840.9231054	1948.67372	1116.06137	1507.236161	1524.463236	1890.592856	1983.613217	1115.573919	1625.121446	1706.719432	1621.252035	1053.487595	2155.109244	1164.039354	3007.67626	3221.246656	1608.102801	2039.13534	1103.362051	1345.881814	1633.921027	2534.052875	1409.309075	950.8171564	2218.654283	2960.69505	3221.246656	2560.766238	1290.07251	2726.050294	1762.20236	761.0245098	1533.006098	1004.423273	725.5901631	1243.684555	1772.370688	1432.725583	2823.103631	1315.047575	1420.697967	1329.024709	1466.262115	1729.175557	3883.766953	1625.917714	1507.881108
PS(18:0/20:0)	40940.52878	56631.44793	25490.44976	42428.47828	67798.62126	44863.13018	58182.54692	94223.31064	116595.68	821.1299507	60957.53749	63452.2756	51789.83869	37106.64594	17851.54879	12054.47765	58442.54919	61949.87378	34588.20799	12497.2269	26393.92089	11652.91727	35634.98116	25097.67181	40315.43577	44691.81782	6518.539402	66586.8211	61949.87378	32154.92743	23848.9947	65968.23693	3437.455255	28580.28925	53304.31019	44653.38018	60054.13477	51372.79363	7191.235975	88594.24286	59405.35539	41943.64989	43149.00082	17404.3917	59815.56252	3496.384061	23070.57114	24827.24269	23384.08006
PS(18:0/20:1)	2082.853443	14061.98484	4273.164946	1445.272427	2423.212462	5194.674459	9871.275601	5212.533523	2286.702961	0	3644.565223	4690.63582	6755.630539	2079.992513	0	1555.395379	6266.166542	2092.939009	5089.054677	7248.627236	0	0	4675.10607	1026.20683	5214.481529	7297.334075	0	7122.842058	2092.939009	2589.687768	3099.296892	1558.950253	0	3648.466552	4171.627971	5213.96305	4689.353246	1817.499473	0	3129.16788	5211.891883	3641.34644	1564.571494	4539.702628	5213.523567	1013.992003	6251.827403	4145.369636	0
PS(18:0/20:2)	1567.646574	5729.886481	0	1043.469599	5197.636512	0	2045.834164	1023.022157	1557.187725	0	1893.62768	0	3972.212887	2073.163731	2596.796524	3111.751275	6796.160244	0	0	3605.42286	1552.147201	0	2362.148924	2073.08639	2084.555528	0	0	3132.713975	0	0	0	1047.190337	0	4164.765954	783.6656671	3126.859754	2441.674301	4692.55001	0	0	1563.391666	1043.488603	1044.159048	3646.681421	4162.358514	0	0	0	0
PS(18:0/20:3)	343912.8114	416186.5249	305334.5926	473426.8994	357086.7681	368327.8199	682921.3062	815075.0009	283544.9054	198682.0667	213918.1728	369266.2542	495061.5391	407657.4886	434810.8996	179873.8837	363432.0447	363487.9279	366299.972	263006.0108	299467.6452	346098.447	399540.3482	361629.5433	353948.7474	369074.0239	280825.9951	451365.6892	363487.9279	343017.4347	371575.1422	464712.9801	259326.0429	356684.8799	509251.9548	594945.1426	522415.4369	571029.4305	326932.8657	509772.1083	419791.8384	366709.6844	598697.3733	364099.6247	554779.8656	253977.565	594999.9442	153516.894	107462.2106
PS(18:0/20:4)	19882.05093	38180.05971	7801.652033	21605.5181	13619.01117	11976.50327	33601.31013	15827.88175	8832.718926	0	18874.67828	20055.11086	24067.05056	22882.03065	7883.982605	3524.187226	21524.23469	8763.55051	13763.13501	13018.43919	4549.192428	12518.75463	26903.85951	11004.96389	17228.83464	31755.80462	2574.976945	23875.25945	8763.55051	11409.57804	11613.70398	10231.51086	5221.479318	7792.72816	19725.30078	16529.50384	12090.09574	21690.50235	0	28300.91167	21957.26259	16098.33014	21253.08407	5619.668898	9019.316279	1795.816647	5079.14064	4604.909266	11908.46952
PS(18:0/20:5)	2758.180625	1889.121104	4625.143115	770.8717054	0	0	2662.649685	2684.87768	5935.79959	0	2397.358791	1502.616753	0	0	2174.33173	1313.907976	1304.657888	1766.158662	1492.539925	1568.305373	1223.844321	1719.526295	1140.37069	1934.539092	0	0	1894.287896	8266.084961	1766.158662	1238.634239	832.2754273	0	3020.788646	1499.802329	1426.09492	1747.734628	1811.171307	956.9714753	0	1098.901129	2238.810168	2386.644458	1248.09154	3037.353633	3312.101147	0	1013.624903	847.5300589	1005.820964
PS(18:0/22:4)	3766.806103	2081.178501	1734.077993	3872.653002	1886.296043	2781.457628	1773.836249	1544.117766	2170.181225	0	1919.364506	4734.776217	2937.989779	2302.812714	2636.403472	0	1080.506703	442.6667262	1617.131874	2058.819554	835.0213569	2108.897166	2820.582642	3712.234699	1809.363937	2723.024851	1565.456166	1122.642464	442.6667262	2146.403599	1360.967505	1952.955358	787.7034866	1621.843557	3114.343673	3574.509151	2294.703815	3088.022235	1258.38751	2536.451835	1197.120176	1444.966415	1527.768476	3078.7284	2555.77185	1661.511457	1684.26877	1275.403109	840.0363034
PS(18:0/22:5)	64608.04001	61729.1168	78849.02321	37111.8582	36373.06344	37201.82585	37032.28082	63307.00656	30913.30803	20023.31153	14348.08044	54459.77001	42965.11822	40718.88716	27758.21369	33610.00024	31371.35837	39786.42147	33758.23041	29691.4944	30399.59603	31760.29668	45096.7367	59395.79319	23379.75597	52837.11249	25679.50356	40855.07379	39786.42147	36689.19037	43171.4481	41925.80453	27884.04401	52536.15836	67097.77915	56414.30547	47950.80759	60317.40963	21561.75176	75837.18446	31061.6148	57282.1855	36096.25992	39453.68354	63172.36074	61735.2114	35097.05495	32056.53618	23417.31898
PS(18:0/22:6)	1021.689154	1564.241213	0	0	0	2056.80164	4655.933408	1030.865688	1573.31023	0	1570.274445	949.3017457	2109.842957	0	1505.166618	0	1060.020541	2188.361722	2020.210193	0	0	0	1887.587366	1009.048947	0	4205.517562	0	953.7331892	2188.361722	0	2986.381578	939.5575962	0	2086.507909	3638.529759	2577.745454	1868.99287	4382.422137	1020.152857	3129.952731	2630.171258	0	0	0	2606.490777	0	1503.266349	1031.922478	0
PS(18:1/16:1)	17285.18208	8691.825992	5117.140619	6595.047658	5110.673614	980.8906599	7357.474545	11165.58091	8985.641242	5312.427023	9689.275673	1961.566139	8209.788575	4380.353057	6166.801812	4912.90017	14905.12297	5401.653486	8398.143265	3670.853	1186.018409	4613.473968	7438.763029	4958.613503	4713.749198	7239.929533	5047.535366	6103.958082	5401.653486	2162.5245	2557.948597	5044.523458	2940.203454	7671.618617	15056.72594	10172.15523	7810.716626	6853.305213	1459.211993	10034.10413	6755.652582	3513.539497	7876.315344	1470.179928	4103.443925	3230.421743	8201.98391	2453.466863	4322.268671
PS(18:1/18:1)	2821.811833	9827.71178	0	3074.683012	3519.877878	3931.484163	9803.03807	4668.829249	4461.113245	1415.609402	6624.726579	2524.044599	2982.234504	3242.042893	3645.476016	1016.528258	4702.694026	922.6316704	6205.198947	3358.748335	2692.002636	4026.139997	4537.497456	6065.322731	3209.611453	8811.923671	1023.256431	2977.131156	922.6316704	4048.66703	4732.194238	3821.200584	0	2591.373104	6746.477019	2588.020853	5692.61704	8880.804234	0	7286.597738	5142.197616	9850.644499	6462.643937	3136.440011	2620.418295	4059.471259	2584.254956	2063.2048	3603.003355
PS(18:1/18:2)	16319.25784	9137.50132	4534.41715	12659.25951	6165.947097	2373.843751	18001.14781	1750.359626	6261.27869	0	4401.724705	10664.26054	14045.48061	7200.996907	5749.664072	6678.466529	4037.937782	12296.36562	18346.35394	1256.781172	3520.562636	6363.772072	4531.825734	5252.306017	4882.077902	11067.90266	2421.745056	5862.243518	12296.36562	7547.619788	9707.552738	7504.108152	0	13299.14031	20839.56106	4525.037461	11170.71399	24466.74501	1409.029186	21901.57288	21971.8562	11676.2264	23062.24336	5158.291266	4556.769753	6022.910576	4962.521234	1154.081326	11524.10829
PS(18:1/18:3)	0	0	0	0	0	0	0	0	0	0	0	0	0	0	582.2126946	0	736.0270661	1621.677181	0	548.9353194	0	0	0	0	0	0	0	0	1621.677181	0	0	0	0	0	0	0	0	0	0	0	0	0	0	0	0	0	0	0	0
PS(18:1/20:1)	0	0	0	0	0	0	0	0	0	0	2574.052579	0	0	0	0	0	0	0	0	0	0	0	0	0	0	0	1022.375127	0	0	0	0	0	0	1452.734803	0	0	0	0	0	0	0	0	1563.042791	0	0	0	0	0	1030.351952
PS(18:1/20:2)	0	0	0	0	0	0	0	0	998.6267526	0	0	0	1449.415283	0	0	0	0	749.6591654	0	0	0	0	0	0	0	0	0	0	749.6591654	0	0	0	0	1010.459868	0	0	0	0	0	0	1040.436808	0	0	0	0	0	0	0	1034.723234
PS(18:1/20:3)	3837.596712	15655.26465	4142.65779	1551.816784	1529.405384	1048.885796	3423.218966	2439.875708	0	0	4792.765925	1564.341728	1558.224686	1805.30425	2720.798974	1554.066168	1722.889006	2064.779707	3103.97766	1016.204183	1919.940918	0	2055.449371	0	4548.191927	3075.076744	0	1290.426747	2064.779707	1547.460157	2062.274831	1655.139501	1564.450442	1797.59243	2039.008923	1488.731823	2550.339078	8341.321168	0	4512.649951	4301.778106	4320.982023	0	0	1310.507642	1017.28901	3649.812007	1014.496276	2589.342171
PS(18:1/20:4)	68408.33373	97048.34629	29187.25349	47528.36682	33245.50704	22140.09487	64633.04288	40658.53086	28037.02369	3347.104755	33709.39095	30496.00832	80820.29876	48521.29443	31698.78285	13189.66194	59850.89529	24068.41149	52974.40197	21290.56612	10112.79832	17491.83298	53299.48402	44205.01008	44215.53938	60956.51224	5384.940893	40212.10848	24068.41149	25404.6211	45342.01796	25867.70853	5197.37103	36168.19166	54003.96125	52088.62967	41245.73637	74281.15685	5735.827959	51435.50136	64926.85839	44668.03108	31567.08636	10265.48861	24973.77867	10336.16168	15260.60991	15387.3646	42754.1711
PS(18:1/20:5)	2896.217583	5210.834452	0	2467.547197	0	0	8363.918103	2077.959773	3673.68112	0	0	0	2096.640845	1536.07563	2594.579815	0	1042.460308	2058.627548	1578.488858	0	0	0	0	1555.939696	0	1548.413645	0	1047.385425	2058.627548	0	2581.559103	1530.452915	1015.671677	1561.577154	1030.454609	2605.28248	949.3465893	5431.537925	0	3128.234285	4171.28548	2587.441691	1565.97567	0	3124.545514	1548.308265	1044.170595	2591.737087	1405.533485
PS(18:1/22:4)	8819.453358	0	0	0	0	0	1544.29282	0	2545.696828	0	4633.707167	0	0	0	1004.205214	0	10487.74299	0	2998.663127	1044.420543	0	0	0	0	0	0	0	2063.865073	0	8849.64965	2573.862922	0	0	1492.239736	0	0	0	0	0	1025.982428	1132.72431	988.3455773	0	0	0	0	0	499.1890691	4668.30205
PS(18:1/22:5)	12844.77495	7820.552319	1564.674658	1310.120706	3624.684696	1011.382179	2591.462626	3646.777339	1515.518964	0	1607.952359	5195.112469	7016.147544	2634.104145	1927.617811	0	4326.724646	3647.533135	5009.312108	1044.208723	1033.604465	900.1156179	3641.543131	3777.365726	4965.949087	2494.333395	0	1352.15386	3647.533135	1007.242164	4355.50842	2610.579423	1031.093287	3849.31051	6778.826302	1513.355928	4480.529636	3181.853589	1555.698109	2960.92301	7288.388633	1529.433648	1562.54461	0	5094.556803	5743.840773	2607.495564	1813.223815	1030.29591
PS(18:1/22:6)	12004.01068	12657.81162	3622.269103	4173.227285	7327.466921	3331.770344	14423.04879	6780.652148	2237.848681	1555.936801	4171.040879	2611.811209	10037.8884	9248.369338	3240.714812	0	2289.56948	2147.641998	8202.240751	2046.330938	0	1564.091023	1205.967027	4682.923303	4358.234432	6332.895787	2103.921516	3758.955232	2147.641998	2975.357662	5518.680704	5067.408737	0	9831.177237	3130.745821	3115.116686	8628.363875	13705.15499	0	11847.54412	11541.37645	4677.332137	6243.502733	4110.487438	5543.021176	0	1203.314837	4677.649702	2519.004846
PS(18:2/16:1)	15775.46696	21227.83725	12929.46759	18122.1084	20873.78576	10817.81325	31092.53371	10482.74473	7509.078422	2021.192435	10329.14685	19597.39646	39951.7358	10108.17913	16932.81429	16332.15535	19145.18599	16087.34491	16973.74695	6661.213563	7483.627642	4297.95491	20442.53254	13169.31028	17404.10196	20206.50989	3796.508154	17579.62422	16087.34491	8133.100758	7466.736738	10632.89909	2775.105638	27324.92975	23989.19673	11624.01844	13538.4852	26305.55081	3639.023081	18817.05874	35173.35661	16886.08185	17187.47202	14402.18801	13413.66444	11208.12373	7510.478023	19130.10273	14223.5366
PS(18:2/18:2)	23602.35918	34477.5938	16674.66227	47744.78124	65195.2567	20834.2888	42563.72755	22192.15893	20954.84814	3127.531583	12758.74886	46962.38454	13973.09243	16105.25027	31328.60491	19924.85379	16173.29916	30139.65411	33346.47714	15542.52235	6330.597763	9886.859728	22466.58598	29484.26866	29171.59445	32437.0727	13329.77822	13880.41251	30139.65411	26999.78319	21692.15797	35371.54398	2071.70982	32222.04257	24730.51519	58010.54367	47966.17648	42249.94022	2596.774941	61484.36583	41693.56257	24881.26516	55785.69448	17713.51645	17735.87073	16956.28279	31034.07525	16163.46854	18520.84158
PS(18:2/18:3)	625.9294737	0	0	0	0	0	1084.502831	0	0	0	0	0	0	0	0	0	0	0	0	0	0	0	1421.118329	0	0	0	0	804.7526417	0	0	0	0	0	0	0	0	0	0	0	0	0	0	0	0	0	0	0	0	0
PS(18:2/20:1)	0	0	0	0	0	0	0	0	0	0	0	0	0	0	586.4917988	0	0	0	0	0	0	0	0	743.4894209	0	605.8878033	0	0	0	0	0	595.543245	0	0	0	0	566.4776558	0	0	0	0	556.829931	0	556.0588849	0	0	0	0	0
PS(18:2/20:2)	0	0	0	0	0	0	0	0	0	0	0	0	0	0	0	0	591.6424778	0	0	590.0693461	0	0	0	0	0	0	0	0	0	578.410221	0	0	0	0	0	0	584.5057961	0	0	0	0	0	0	0	0	0	0	0	0
PS(18:2/20:3)	9900.181898	12511.50969	2060.641744	13534.66604	14230.50157	1578.774079	5914.705661	2591.53543	4162.409253	1049.214756	2797.671707	4493.695032	17512.13752	3234.610135	4162.041797	4663.388977	4965.91786	4149.181548	8508.870038	1263.692896	0	1442.967441	3872.398401	3248.162145	10474.97991	7319.350121	1042.501358	6153.327957	4149.181548	3362.801055	3216.274522	15942.35962	0	5010.773583	8033.573601	8715.422961	7407.099804	15415.39902	1040.700205	14725.45909	8147.584955	4823.651734	6856.959009	2603.916867	2720.015663	3145.574149	7840.127775	3508.904601	2718.925197
PS(18:2/20:4)	86657.89324	106485.8589	30842.36031	86719.8702	130818.8525	24446.18947	75033.64289	74244.39093	55242.59802	3617.275712	48335.98025	41048.96725	156961.5773	38022.29854	38461.95716	14354.86981	87728.58794	15077.63984	68974.82517	30807.39917	23502.39846	20031.70793	110936.0166	57864.89564	49301.9254	83558.73261	13270.9157	47933.39977	15077.63984	64725.97791	59904.21603	54245.74901	5120.319302	34322.26283	105364.9238	136043.9709	55087.39785	92944.18268	17386.69519	134865.2616	50188.10776	68189.72795	40760.48355	21868.79076	20187.39074	38016.15125	29075.29341	34851.74082	26378.52335
PS(18:2/20:5)	1545.828634	3585.994834	0	2558.729424	3934.763379	0	6104.069544	1578.333483	3806.248273	0	1568.205668	796.8528855	0	0	0	2090.527777	2099.953574	2504.571692	2101.29211	0	0	0	0	918.8051734	0	2399.119889	1562.338378	0	2504.571692	0	1971.581786	4565.791111	0	1928.167258	1051.836553	4204.126786	2623.573103	4037.762748	0	9365.445808	3168.47833	1046.421521	1053.915385	0	1016.917997	1562.892172	3146.945004	0	1004.857288
PS(18:2/22:4)	4950.140093	7820.349017	3700.090654	3845.683543	8012.401593	2088.201566	2057.906442	5380.025302	1924.216235	0	6754.851786	2472.232669	4850.574869	4897.509558	1534.719578	2530.504617	2304.65974	1550.624787	1958.152851	2092.386986	1518.305022	1541.926955	3604.872815	2005.055579	4597.336863	4281.791629	0	1787.950322	1550.624787	0	2255.960767	2304.493908	0	5669.036378	11529.85798	5007.525367	5499.836035	4520.746932	0	5215.422756	4940.035636	7505.077395	5539.494423	2498.51011	3255.073873	1909.853717	1943.768348	3421.561314	3895.742503
PS(18:2/22:5)	7572.414261	3246.231716	2572.162739	3719.523611	9029.306332	2630.180729	7551.256926	3637.654177	5637.79369	0	4738.494634	1905.40248	5465.880747	10050.33597	2440.034066	1070.587987	3108.658135	2401.389708	5090.576038	0	0	0	0	0	3127.730252	6918.672638	2025.718907	1824.70222	2401.389708	3515.778744	4349.716877	1855.99067	1517.015253	5059.765224	7128.661931	4988.427267	7086.660685	7078.712426	1510.28572	4285.069707	9094.269136	2895.903776	9204.769619	1505.818951	10620.94868	1656.889105	4513.105628	1685.920228	2741.032702
PS(18:2/22:6)	3245.391639	5879.879121	8206.70923	7908.25846	4312.550153	4598.534197	17292.4442	10663.45418	11172.11607	1028.063051	3765.846315	6311.030345	2180.16678	11990.05364	3900.621108	1979.276205	5003.745429	3909.755887	11583.48775	3334.099035	2335.696338	0	3357.173156	1499.760628	4605.900757	5605.043364	1543.74855	10893.25447	3909.755887	5307.947901	9004.210062	4313.787948	2101.826063	8796.942862	3752.23115	5093.082947	8411.026614	12847.94576	1552.58893	12742.27289	12672.05049	5519.60817	6934.126163	2237.733207	5419.97122	1042.147557	4036.310612	1560.434589	1600.864361
PS(20:0/16:1)	32410.5956	44858.50433	19507.26885	19368.62321	56024.87905	26008.80705	22985.73042	66392.70797	93068.06622	4081.078723	26770.37805	24659.13101	31117.3402	20613.30398	10751.17323	13609.04437	47959.88567	63494.22936	13423.02125	18394.20934	20337.09955	8530.895696	29498.70736	19898.64783	53706.38607	19755.97485	3167.444218	20739.38489	63494.22936	24197.74299	24779.9047	29807.86717	4380.764279	36223.39843	25505.27007	26221.31697	45039.30825	34714.77286	11098.00103	106281.4605	92591.97735	17579.10097	15238.53313	9097.817295	24117.76135	3852.25572	19359.10684	36342.41545	27895.8564
PS(20:0/18:1)	7220.291202	7662.160141	11631.17964	7262.997317	7001.029514	3321.656608	2742.803943	5004.186706	11125.82347	0	1525.847045	5948.636204	13196.84102	10643.54419	2322.923566	3966.095982	10831.636	9193.684478	1370.923836	3009.775107	2371.748116	0	2734.667589	4002.524919	2039.61703	6940.887643	2014.840151	5445.391081	9193.684478	0	3302.382656	3924.093256	0	7614.545024	7419.532688	4482.200959	8557.140785	10864.12291	1559.660451	9871.240141	6583.932441	8043.022027	2100.350924	7935.82467	7564.454871	3015.67572	3440.611182	7996.05945	5896.939184
PS(20:0/18:2)	345638.7955	673591.4222	270317.1213	352875.8313	855452.6297	413630.4472	594823.9314	335681.6011	212841.8996	30831.03343	247292.6966	736256.0137	543481.9198	362133.9211	394709.4256	277878.4656	435441.9022	431618.0908	320856.6028	296725.9866	159067.7086	93650.49116	354850.1091	497532.2531	705223.912	401486.3149	111129.1811	497468.2939	431618.0908	364177.8696	323184.5359	256137.4404	39065.91181	449055.6069	316460.6804	543096.3804	720034.283	688496.0096	53098.69841	682061.9912	774829.7928	348219.8064	385077.8808	189554.3581	264143.3669	64897.71065	469073.9646	399610.7556	400923.7441
PS(20:0/18:3)	6095.999384	27929.67054	4649.450683	4119.996416	27587.22487	8230.016459	12496.35408	9838.487419	11617.40719	585.5702093	4925.372475	8590.852212	7091.17228	3820.520369	12310.92891	3586.374108	10459.62917	8685.071132	7355.456046	4411.44198	4775.800742	2847.090961	6850.324141	10225.20998	9886.908059	7902.172138	1104.60493	43128.45121	8685.071132	4347.230102	4833.11675	3892.862747	591.4200149	3828.978083	11273.93118	13100.91796	7255.658769	14580.33385	4015.212911	18483.86283	22721.94772	1848.408809	9228.043435	1745.639106	5170.44295	866.7240042	4090.020853	6646.744361	3329.410254
PS(20:0/20:1)	0	2793.215294	3409.475323	1295.817483	1977.903493	3455.097273	2292.221505	3158.151291	1700.058257	911.6033622	3278.042901	3036.564686	3117.074751	2576.238448	588.2958036	1026.972642	1242.821112	0	2304.355255	583.4507513	0	0	4413.070927	1434.342303	2740.128119	1961.19449	1914.764181	3923.289895	0	2042.260537	881.3699091	1212.231011	0	2583.150029	1313.625818	4200.285032	4551.956649	2816.210659	1902.825898	4027.450241	1362.606923	3154.936636	0	1396.813613	1718.89956	1131.248365	2328.35057	0	2283.166403
PS(20:0/20:2)	8556.94973	11879.11554	5595.460482	4417.218788	20894.08475	5380.503994	11029.45232	8645.690505	7203.773511	1128.559612	13415.88845	8322.393332	12585.16358	6502.061043	10340.2473	6207.390105	9954.672052	13668.342	8788.757655	3181.448149	6490.654124	4308.680793	2577.06314	6937.274256	11325.405	6819.250866	1684.029016	7633.389967	13668.342	9624.629069	5973.051465	5765.054225	845.8403913	8976.915118	9011.873064	11064.25651	13702.1827	14339.92663	808.8606912	13132.52079	20846.7566	7804.979077	9979.003805	5711.346195	6432.06447	1927.129792	7532.631569	5751.686244	10192.59818
PS(20:0/20:3)	46539.05365	81873.9173	18263.69365	34657.40188	126140.8433	31458.35296	23123.09974	47612.78265	39927.45369	2260.575937	37452.65598	46101.88574	28160.41199	22033.15052	26282.00188	21881.94798	44032.16043	47066.3182	30292.99785	16846.3097	27361.77363	5321.398495	34784.0704	24836.19707	70471.37	24077.31101	10663.02501	26718.89105	47066.3182	36418.21138	19905.03179	32008.24588	3717.345525	37454.70892	41073.13255	42182.09428	49904.35102	23155.72132	7076.357969	97030.82818	55558.23917	31119.48236	26987.98193	11209.67651	28158.10159	7427.119603	28802.81618	40656.07812	49802.29513
PS(20:0/20:4)	96099.50627	135585.7657	90109.69416	89867.01629	214958.5216	85305.39195	129943.0299	130069.2949	156645.0475	4247.005844	107519.7551	95566.77093	115173.5035	193449.7237	109632.1583	47532.56874	116758.9195	94370.17438	64849.63333	62997.18388	44854.47297	34006.21779	106505.0751	80569.94663	142290.5853	107293.1272	24519.63954	143762.2647	94370.17438	98648.31161	74644.85108	66460.64204	5331.525055	104636.8898	95782.99864	136218.831	171502.2211	128936.3279	20092.46522	263955.4266	125518.1029	121017.0628	87633.551	43548.52494	77292.11437	15479.86073	59502.04526	81088.96759	110550.7933
PS(20:0/20:5)	4645.954864	11219.84314	1468.354852	5375.937504	11692.4665	0	17937.17902	5708.211658	11194.60022	0	5873.948685	3770.407437	1784.932732	10588.60366	0	850.1032673	2783.131667	10485.50245	3512.216931	2314.801324	584.9549343	875.0318321	0	1516.720244	4868.616587	3293.075524	0	1980.195682	10485.50245	1831.157728	1737.026111	4443.852632	0	2442.79803	6614.850563	3835.70088	4431.273577	4904.955498	890.9994222	13339.32658	8607.960589	3116.281721	3041.708374	2176.407071	2878.394108	0	3619.591806	1708.409076	2878.162359
PS(20:0/22:4)	8183.549246	6000.241646	4418.016527	4656.570903	14188.4524	3345.578384	7122.083455	8959.345948	8157.764768	0	9442.9106	4285.65045	5951.865266	8008.759893	7303.731221	1970.330249	8922.547185	3845.317866	3762.679518	2618.453944	2023.327212	2578.189818	6795.873023	4468.19353	7963.025397	5775.178646	550.2998968	3625.248256	3845.317866	8419.333493	3151.123715	5579.836299	660.4859703	6570.132756	6207.997791	9193.65102	7206.898598	6993.660475	2047.709489	7500.926925	9747.575419	3605.285695	6500.662955	2210.206299	5464.177472	0	4654.317258	6518.375702	7638.813591
PS(20:0/22:5)	3104.789364	10580.67719	3503.221295	5348.002247	16596.6381	3942.877959	14282.80901	10389.56345	10396.14661	549.9774186	7709.913525	5656.586233	8059.885274	7220.980687	10263.82141	3579.152726	16871.64278	10242.4336	3348.947693	4778.770717	6652.650483	1624.760115	5353.210542	6201.221042	14375.4677	9225.280894	3986.954222	6741.514364	10242.4336	13732.7325	2388.526833	4321.25459	641.1869889	9164.98972	6998.552195	13880.7104	16398.33741	10194.08546	3533.522829	22162.78891	26032.36265	7087.325756	14050.59079	3930.404439	8831.691828	0	8929.053244	10879.49868	9955.875917
PS(20:0/22:6)	19041.06967	38606.11505	19594.13723	7771.758352	50844.0919	24305.18524	38479.48848	20908.70871	28439.93628	1108.230673	18941.75709	33386.46595	17438.52659	18521.18354	7314.476898	17003.39562	20696.00558	22107.87601	10110.0104	8952.265786	4787.142212	3371.919418	7818.215122	16075.98138	28027.76032	15587.64566	4060.885165	38963.57794	22107.87601	13911.80507	20680.8072	11942.30441	733.8082816	23392.47097	6561.44035	17756.07264	30531.83663	38977.06757	1290.766214	47803.10962	51190.81215	18862.51652	16007.40532	7137.283553	18285.39966	1901.521146	25168.78836	17803.69443	13394.18597
27 OH cholesterol	1.49562152	0	0	0	3.400550638	0	2.579839966	0	0	0	0	0	2.361091504	7.793919862	2.037768604	0	2.161250515	0	0	0	0	0	0	0	0	0	0	2.604921181	0	0	2.522659823	0	0	0	0	2.362506594	0	0	0	0	0	0	0	0	0	0	0	0	0
Cholesterol	9971.991698	9934.233569	9952.657534	9950.712415	9963.620181	9933.446768	9965.453059	9943.557444	9904.421552	9948.011908	9941.80352	9923.795182	9940.239171	9892.161373	9957.902554	9942.328956	9945.055414	9929.256187	9969.964223	9942.920261	9946.762059	9967.059077	9972.334303	9969.774311	9901.906544	0	9919.478231	9966.079566	9953.633789	9965.667748	9966.837975	9952.552796	9943.199083	9958.912676	9938.020562	9929.472306	9959.288893	9948.836136	9934.866618	9967.458332	9890.742326	9947.666335	9946.212477	9840.653264	9954.640734	9970.946478	9921.517935	9951.555621	9967.761124
MAG 16:0	0	0	1.920113343	0	0	0	0	0	0	0	0	0	0	0	4.072482083	0	0	0	0	0	0	3.019609574	0	0	0	0	0	0	0	0	0	0	0	0	0	0	0	1.836741191	0	0	0	0	0	0	0	0	0	0	0
MAG 16:1	0	21.06862129	6.11885937	3.535984464	2.484830884	9.864523576	0.450466065	10.11357163	2.1139247	8.049821434	0	4.468808931	7.375673761	17.2952221	1.998645635	3.12758942	3.594371966	16.30032889	0	4.484062606	0	0	0	0	10.77399284	2023.06119	9.543809008	2.901016536	3.34681943	0	0	5.575625959	5.168181223	8.180087325	8.573570148	4.688742649	10.94862172	3.835589902	6.55085922	2.35044692	7.722332288	3.009390267	1.989927675	8.383243523	1.61255883	3.281283009	2.842938201	2.667054247	4.791691494
MAG 18:0	1.279756157	3.948990793	10.53619303	4.266040112	1.827693979	5.717974978	8.767283184	2.479735505	6.593560682	7.788754841	3.620537296	9.205855395	3.506251586	6.163282052	0.696024873	7.656533342	0	14.08670704	5.087301009	8.100096201	5.213446414	0	0	0	9.354805876	0	14.11027766	0	4.682377141	3.299479246	2.041919432	3.299950116	9.868031061	1.509465751	0	0	1.545408207	1.340790113	4.995027414	2.135572542	14.21079734	0	1.881442501	7.87366174	0	3.454935198	4.457460005	2.435319464	2.568184565
MAG 18:1	2.987615849	7.425862052	3.142395158	5.627385004	10.70880679	20.86738549	1.989285417	14.41612877	29.92704168	5.224901542	6.454390776	9.083308362	6.017374204	15.34227114	6.937750199	5.592521101	7.646930113	2.542372525	0	14.28593833	8.801451738	8.70275629	5.093852299	6.288103003	19.63101433	0	21.72457321	1.751339051	17.2413449	12.99878063	7.33073935	6.213085135	6.00381836	15.38190077	24.43170518	14.98966963	3.170670304	13.40984514	2.800482157	6.99187435	16.26378737	10.15465673	24.49010048	20.17442493	16.52917773	8.032847438	6.487756127	8.290247301	1.945664679
MAG 18:2	4.366435346	4.381903868	4.249898593	3.267820883	1.474980549	5.013518336	2.223197482	0	7.599501363	9.149046334	2.504071339	13.63432217	5.283696167	17.11465569	3.12854752	6.835299842	3.419025161	5.086711789	0	0	0	5.341871431	0	7.189979809	2.483610498	2433.706983	1.200280192	1.75930972	0	0	2.522556597	4.725984573	10.34626529	0	1.909629618	5.372286141	4.349032771	2.821866217	2.223233407	4.567287181	6.392790636	0	0.825384083	1.256176873	0	0	7.410947011	0	2.21249631
MAG 20:0	3.797592347	15.1006856	2.051464112	2.796887974	0	1.263052179	1.717535482	0	0	3.233985337	3.579249253	0	1.996482833	3.11848233	4.072224647	9.400271713	4.06994375	3.052629191	3.71072675	0	6.605632353	2.320265555	0	0	4.422393619	0	3.39542119	1.409112853	2.513379214	3.390030397	1.667666703	1.732275949	0	1.621933193	3.97048002	10.18166342	1.257563097	4.700595972	9.149937039	0	9.038135583	5.901922342	2.879271268	6.660036978	2.99482134	2.406142888	14.81304585	0	3.830762418
MAG 20:1	0	3.919713833	0.755521489	4.367336116	2.290472854	2.931699928	5.075400957	2.929836628	11.02914669	1.15547279	4.387293055	3.563216604	2.273120152	0	0	3.402332824	5.401556723	3.053205858	2.752428577	5.9772015	2.90602237	0	2.10063052	0	5.807099518	0	3.602269417	0	5.244763456	3.391809456	1.629512462	2.026771895	9.753957131	0	5.454721359	4.842046577	0	0	6.673866538	0	4.253960961	4.31525595	5.68820192	6.660810415	5.445746231	0	5.450869129	0	0
MAG 20:2	1.495161929	0	0	2.380227638	1.527397945	2.327620668	4.12391	2.080555681	2.565541707	3.057131189	2.585674376	0	2.314327175	5.191878714	3.05168305	3.455437538	2.092625177	3.281127706	2.426329487	2.990857631	0	0	0	3.915007722	1.196423042	0	6.92282126	1.682577584	0	3.39181029	3.315370236	0	7.823521873	0	2.464554919	0	0	0	0	1.834808757	6.99743755	0	1.948930314	3.572500283	4.977040403	0	0	5.074275645	2.182725835
MAG 20:3	2.989010929	5.730464082	1.723975555	4.010564415	0	2.09049392	1.213822968	2.102868826	8.869066252	0	5.322387512	3.654305365	0.699052481	9.746715668	0	1.728941456	7.46769742	0	1.364174144	5.528071038	3.710819228	3.019543228	4.75197851	3.452152965	6.580685337	0	0	1.737482428	1.793415651	2.664573513	0	1.706435634	0	0	0	1.965809169	1.177599512	2.781900035	0	0	4.370674077	2.673332726	0	1.767249092	3.770599493	1.21095187	2.96063149	7.331908533	3.27569019
MAG 20:4	2.225876006	0	3.280481367	5.8514057	0	0	0	0	0	0	0	3.480100142	0	3.505077851	0	0	0	3.426285043	0	0	7.125949793	0	0	0	4.838160386	942.5388092	0	1.536695728	0	0	2.522659787	1.684257527	0	0	5.127821202	0	0	3.64851141	2.961490318	0	0	0	1.894956839	0	0	0	0	2.298887469	0
MAG 22:0	1.351457873	0	2.124954316	0	1.799666126	0	0.638138618	2.103741063	2.244631793	0	2.557222326	9.048189262	3.535121879	6.201484078	2.034713479	0	1.548817808	5.183619149	4.94983988	0	7.425153257	3.019735441	0	0	5.349736088	0	3.470549802	1.364124653	6.252439488	0	0	1.805897426	0	1.806453889	2.729552365	0	1.563439839	2.819082419	2.224322969	2.775470891	0	2.932310599	0	0	0	0	2.964068152	6.026695473	2.183295047
MAG 22:1	0	0	0.752387304	0	0	2.447741883	0	3.153737591	5.00189732	4.234082312	7.749125301	0	2.361091349	0	0	0	6.378066812	0	3.710661785	2.988701853	8.82723953	0	0	0	7.389074316	0	2.430381191	3.642624014	0	0	1.680192688	0	0	1.970732707	0	2.420479857	0	2.763913741	2.651538541	2.180240212	4.52045867	0	1.552637964	0	2.492610487	0	8.794047542	2.926070307	0
MAG 22:2	0	0	0	6.784886633	1.526590137	3.893870171	2.579990281	0	3.35145119	1.902487333	3.852043509	3.654338789	5.583852385	7.795462552	0.487465247	0	0	0	1.901831545	4.484024788	0	0	1.948891052	0	0	823.2729371	2.353784959	3.381421014	0	2.044159707	2.465167357	0	3.864839621	1.535899886	0	3.632680537	2.162150172	1.881948938	4.191248258	2.266950941	13.98788834	3.654895899	3.550167379	3.885233161	3.769161023	1.221818483	2.869746407	2.382363536	2.154459688
MAG 22:3	1.804845787	0	0.953505851	2.349839647	3.051683944	1.043198162	0	1.706581886	3.355925652	0	0	0	0	0	2.114329444	0	0	2.56926642	0	0	0	0	0	0	4.726844397	0	3.642802915	0.754089623	0	0	0	0	0	3.969533391	0	0	0	0	0	1.474776949	4.578583187	0	1.948869807	0	0	1.191298184	0	0	0
MAG 22:4	1.481928851	0	0.901876229	0	0.783565792	2.120639526	0	3.153695719	0.624558858	0	3.873254419	0	2.401656724	0	1.986479038	1.694782746	2.161269113	0	0	5.03209265	0	0	0	0	2.950944855	1029.249533	0	1.735830879	2.474508653	0	1.593127101	2.637019222	0	0	0	5.415456481	0	2.803936789	3.526448658	1.851330186	0	3.910468444	0.855990786	0	3.767550464	2.124194116	3.304467564	2.925924571	0
MAG 22:5	0	0	0	0	3.968274718	3.893053135	3.188070284	6.260437364	2.580174048	0	2.584856567	3.302038418	2.359636605	4.76743835	2.632994961	1.685871616	0	4.469061776	1.901071543	3.208692573	0	0	3.202313706	4.187527462	0	1628.013575	3.370179881	0	2.817163188	0	3.870453625	3.366535498	0	1.959584149	0	6.008467728	5.465508224	1.872527529	6.065565894	2.698904142	0	5.229230287	0	10.57752435	0	1.104076846	7.392425954	2.875447655	3.104520975
MAG 22:6	0	0	1.632887583	0	0	0	0	0	3.357830574	2.870214279	0	5.363578421	0.926540133	0	2.037770133	1.728928758	0	2.590345132	0	0	0	3.019609504	0	0	0	0	0	0	0	0	0	0	0	0	2.729552364	0	2.345976726	0	0	0	0	0	0	4.014393961	0	0	0	0	1.974284296
S-1-P	0	0	0	0	0	0	0	0	0	0	0	0	0	0	2.344738619	0	4.322301028	0	0	0	0.184862223	0	0.433083166	0	0	0	0	1.737409312	0	0	0	0	0	0	0	0	5.089078882	0	0	0	0	0	0	67.58583253	0	3.363351604	0	0	0
Sphingosine	2.732998911	4.190189172	7.197952597	4.049206838	1.535304343	3.078459589	0	5.941665117	6.364195873	5.322194714	9.126374707	7.746756285	10.76585989	3.802736437	2.463828906	11.36253398	4.680730407	5.102152579	2.231411816	0	2.437364585	4.497532212	10.1349478	5.192917588	12.5886711	1120.156973	4.754618045	5.922479039	0	3.151608637	0	12.67336474	3.97230219	3.151732705	4.587850348	8.647884786	1.636057973	4.646614289	11.11936118	1.414004799	16.92082849	10.55220197	4.281641638	16.93564865	0	1.662622836	8.73366173	3.210185264	2.01510043
[truncated: 13 more columns]
