# Supplementary material for: Plasma Lipidomics Profiling to Identify the Biomarkers of Diagnosis and Radiotherapy Response for Advanced Non-Small-Cell Lung Cancer Patients
Source: J Lipids. 2024 Jan 27;2024:6730504. doi: 10.1155/2024/6730504 (PMC10838201; doi:10.1155/2024/6730504)
Supplement: Supplementary Materials — The original data for all analyses in this manuscript are provided in the supplementary document, according to the corresponding subgroups. The corresponding subgroups can be obtained according to the supplementary file name. [file 6730504.f1.zip › Squamous cell carcinoma vs. adenocarcinoma patients in post-RT group.txt]

Sample	88	89	90	92	94	95	96	98	101	103	104	105	109	111	112	113	114	115	116	118	91	93	97	99	100	102	106	107	108	110	117
Group	Adenocarcinoma	Adenocarcinoma	Adenocarcinoma	Adenocarcinoma	Adenocarcinoma	Adenocarcinoma	Adenocarcinoma	Adenocarcinoma	Adenocarcinoma	Adenocarcinoma	Adenocarcinoma	Adenocarcinoma	Adenocarcinoma	Adenocarcinoma	Adenocarcinoma	Adenocarcinoma	Adenocarcinoma	Adenocarcinoma	Adenocarcinoma	Adenocarcinoma	Squamous carcinoma	Squamous carcinoma	Squamous carcinoma	Squamous carcinoma	Squamous carcinoma	Squamous carcinoma	Squamous carcinoma	Squamous carcinoma	Squamous carcinoma	Squamous carcinoma	Squamous carcinoma
FFA(14:0)	595946.5958	799922.0098	1832732.065	1128901.702	354360.1945	773078.764	1003379.213	974904.6414	992552.9066	977033.1473	1749475.611	2214568.412	211661.9699	727322.4857	2218357.61	129488.457	804157.8437	684723.4305	0	0	279640.073	960814.3752	499152.4513	588002.783	883801.0207	860496.7804	0	531092.1051	195507.2554	596165.1465	0
FFA(14:1)	1094704.097	334924.258	908028.8736	658599.4129	705151.7776	511970.0412	835892.5059	633843.6382	764805.1373	1109414.245	842697.0886	852857.8649	345630.8977	403704.3004	476170.3296	629065.5958	759959.3847	448475.7926	0	0	700042.979	535618.7917	575133.0902	745366.0168	567230.6261	475881.3601	0	924169.5561	740740.8646	528089.5286	0
FFA(16:0)	9760565.815	18350000.88	15713334.42	14097203.13	5455683.725	5909197.872	17563255.21	3976837.357	7194479.11	27606755.92	19271944.94	20843258.46	6459643.577	8800190.604	31559711.04	6432881.558	18997520.99	5852240.114	0	0	3263904.108	17650488.47	11507360.48	5188461.216	7081226.142	2434845.563	0	9458884.121	4467952.07	10929759.19	0
FFA(16:1)	824612.2092	1897199.985	2618311.947	1024454.285	533968.2756	1367731.913	2148245.775	110844.1254	597395.2092	5971841.754	2949344.597	2295049.672	497652.604	1795583.142	10024621.28	1066554.025	3550715.196	238885.914	0	0	204522.7068	1336917.171	1803287.831	147099.9839	755509.9842	149373.4151	0	1560205.335	226035.3994	1864376.839	0
FFA(16:2)	353192.5079	275319.965	318746.8771	313228.0653	199711.2248	355651.2217	207102.4722	356711.4855	320449.7134	305237.1876	247436.1075	393919.7765	448495.3929	252652.8842	289337.6267	305490.3772	291956.1738	286265.5777	0	0	158704.2921	91168.04808	309118.2871	168808.5484	297787.7301	205799.2584	0	410102.1567	290696.3197	224282.8879	0
FFA(18:0)	8508309.254	14810174.47	9291999.728	11466408.88	7313838.54	7598431.7	8760158.212	2721604.48	5462561.815	14950628.71	8633694.547	9223929.708	7905887.123	4983515.43	14104912.58	6916397.586	13119822.85	4434224.997	0	0	4436605.626	9005827.021	12916760.66	7515761.532	10579859.66	3994620.526	0	7432202.195	6390949.927	7998003.651	0
FFA(18:1)	28181619.28	50742382.08	31631646.72	35740391.5	14292711.73	19954127.96	36198613.05	5659501.808	22138819.08	80592365.7	29064890.67	26293838.52	17548067.49	23181955.08	66901629.79	26676613.25	54747902.85	6585303.599	0	0	6929136.918	41836731.94	35873167.65	8943245.126	28826323.54	4375036.066	0	23113003.84	8648024.612	31828253.21	0
FFA(18:2)	17331095.38	32272802.62	16193625.43	22432287.59	7584885.717	9482319.078	22449520.14	4210642.106	10296794.85	64472745.3	17832252.07	15710833.3	11701148.07	14455597.9	48532199.06	14457380.17	36872294.92	5569417.817	0	0	3516451.328	21827249.06	20672426.68	8324277.413	14067929.3	3415465.952	0	12222849.73	4974593.222	18471031.49	0
FFA(18:3)	850750.6074	1226116.676	986810.4151	1555187.099	486902.022	582461.0227	1254751.021	268566.0856	445720.472	2902333.603	1412248.482	953053.4252	921373.3549	862604.0044	2907899.548	764090.4604	3188486.529	697320.9609	0	0	271961.4699	1051755.624	1705288.082	558181.1426	528846.7534	123901.1555	0	766306.6422	269778.2645	761063.7234	0
FFA(20:0)	976926.6607	3133730.241	3482030.473	2217816.196	3223948.69	2428434.062	2545933.119	930744.0527	1973966.918	2423934.659	1104642.234	934503.3445	368350.4227	1131674.799	3243924.732	1037034.99	8461763.851	1017536.59	0	0	2300633.607	1918227.301	2563881.115	3153918.155	2115806.03	2103444.449	0	536346.3026	937190.8824	5849225.96	0
FFA(20:1)	1136651.584	1114086.087	878264.8291	741111.4313	271983.4266	318351.1265	543160.7368	320364.1927	382237.8198	3369954.844	559946.8731	463577.8201	279034.6499	371177.0957	1674125.191	590868.3964	2341788.643	737915.9577	0	0	149734.0486	1075856.782	918691.0782	246454.5017	1634312.173	277413.1789	0	365378.9808	136578.5854	557332.5013	0
FFA(20:2)	675874.1089	889162.4958	466669.7918	537442.0947	270998.666	405370.5142	556822.2864	82762.33302	272484.5439	2469882.556	365896.3887	399669.3981	323174.3751	375890.377	1341888.957	462261.3811	818695.1508	121695.9381	0	0	155287.1483	727633.5448	778337.6858	252275.1986	428397.2193	105726.1013	0	340385.2577	158487.5095	516563.4044	0
FFA(20:3)	1685287.491	662188.3944	362220.5374	321420.6349	584759.0662	517917.5332	590448.1574	462588.5956	471873.5626	2687740.856	396351.8303	375844.1259	723887.0701	426190.3129	1661572.168	645788.3682	1056151.616	103968.5318	0	0	539124.3593	485543.8106	597669.4338	755298.0496	636666.4829	420277.7562	0	491167.5027	645138.0399	433209.8501	0
FFA(20:4)	2719777.05	1159634.451	954442.9079	817592.7493	243119.1266	1417885.744	1787022.196	350713.8782	553762.7464	4022545.541	971502.2386	1316612.619	901256.8589	1043269.238	3013633.355	938350.6938	1150813.078	393279.2543	0	0	233565.3389	1101707.435	944235.2156	518544.7999	968270.4391	266152.2887	0	860814.1629	396445.076	1040179.293	0
FFA(20:5)	169628.3325	500411.0071	322711.0974	254453.6712	265705.8442	496756.2677	221879.7226	313255.953	198287.2031	216788.8256	202333.6238	131869.9085	235843.4073	284396.1064	446148.2454	431781.2772	746749.2802	161256.5229	0	0	318526.6993	163404.5909	567085.0644	614918.0672	586261.2334	292927.7868	0	380279.7177	486143.6354	319237.7897	0
FFA(22:4)	1244966.683	691361.7201	358388.2778	478473.1796	197465.338	441145.767	595150.9549	83828.99631	232523.8051	2730071.736	260184.2227	265886.5065	222311.051	328527.2808	1113808.114	300805.3442	501726.8438	69189.30171	0	0	153779.685	528357.8951	536358.329	230187.618	390614.6282	90846.36735	0	218955.4338	94271.51695	418883.5695	0
FFA(22:5)	1002171.326	600437.598	355836.8705	388168.2445	157958.3166	388150.5772	672103.0173	123241.6827	213634.3326	3050917.292	269608.2856	218126.9055	228614.8748	266332.6842	828967.363	187826.7582	641443.2729	67300.03585	0	0	51466.16512	442207.0282	493624.0495	167586.8246	260628.2284	91298.25156	0	313476.5758	95438.75901	268643.9269	0
FFA(22:6)	687081.1375	532527.3686	504443.746	283312.5182	274625.3545	344995.7256	602860.3025	27259.64055	321446.2207	1327716.255	250419.2557	256595.8614	324298.7198	236065.4124	804337.808	179111.2169	608793.2024	98795.87095	0	0	75633.64065	321031.7928	546100.3184	183288.6738	240949.2991	20675.4155	0	498945.2847	132783.7475	220495.5391	0
FFA(24:0)	15901240.94	5275749.753	15137050.22	9041591.156	997749.0283	4971323.098	6979997.34	17086436.08	3062811.333	1262394.636	1734759.052	13180090.71	17282071	1829269.235	23776584.21	1344657.671	2387052.075	6706977.255	0	0	3046241.502	331945.4159	1701939.814	3095132.662	9547286.384	1543686.092	0	1687376.553	613871.0888	26213702.89	0
FFA(24:1)	1132531.284	435448.5981	393639.8126	562019.0158	300252.392	221932.2935	165105.5591	152692.8018	199537.4406	1476302.081	120007.4803	94317.66881	166796.5712	201447.5829	355271.5948	229226.8652	833210.6281	69588.03339	0	0	532581.203	274604.7459	579603.5961	401349.9811	1239998.147	115951.1137	0	151771.7739	49940.18118	239677.965	0
LPA(14:0)	0	0	0	0	0	0	0	0	0	0	0	0	0	0	0	0	0	0	0	0	0	0	0	0	0	0	0	0	0	0	0
LPA(16:0)	4445.065491	0	2886.831953	2184.271828	2989.470928	0	3427.067676	1176.333705	1357.203424	2536.557804	1499.217098	2148.903502	0	1332.70405	1208.532775	0	1267.162577	3192.747716	0	861.02849	2624.297796	1494.985955	2365.500782	3078.65329	1628.424293	0	966.9356484	0	1603.403903	0	0
LPA(16:1)	0	0	0	0	0	0	0	0	0	0	0	0	0	0	0	0	0	0	0	0	0	0	0	0	0	0	0	0	0	0	0
LPA(18:0)	0	0	1234.419791	618.5256517	0	0	822.4622655	0	925.7632247	0	0	1190.586849	0	0	0	0	1035.810066	1094.921219	1073.203909	0	0	0	519.4497988	0	0	408.6935508	0	682.2617657	481.1826988	0	0
LPA(18:1)	0	0	923.922105	0	0	0	608.6228891	0	518.2368869	638.421802	364.956887	0	0	618.3680267	0	0	0	0	0	0	0	0	0	0	0	0	0	0	0	0	0
LPA(18:2)	0	0	0	0	992.0513724	0	0	0	0	0	0	0	0	0	0	0	0	0	0	0	495.4181133	0	0	0	0	0	0	0	373.4883076	0	0
LPA(18:3)	0	0	0	0	519.1821678	0	0	0	0	0	0	0	0	0	0	0	0	0	0	0	0	0	0	0	0	0	0	0	0	0	0
LPA(20:0)	0	0	0	313.5795	0	0	0	0	0	0	0	0	0	0	0	0	0	0	0	0	0	0	0	0	0	0	0	0	0	0	0
LPA(20:1)	0	0	0	0	0	0	0	0	0	0	0	0	0	0	0	0	0	0	0	0	0	0	0	0	0	0	0	0	0	0	0
LPA(20:2)	0	0	0	0	313.5878789	0	0	0	0	0	0	0	0	0	0	411.1799553	0	0	0	0	0	0	0	0	0	0	0	0	0	0	0
LPA(20:3)	0	0	0	0	0	0	0	0	0	0	0	0	0	0	0	0	0	0	0	0	0	0	0	0	0	0	0	0	0	0	0
LPA(20:4)	0	414.5283621	0	0	0	410.4578205	0	405.0230564	0	0	0	0	0	0	0	507.7607534	0	0	495.1287263	0	0	0	0	405.3089517	519.1471845	0	0	0	515.859662	0	0
LPA(20:5)	0	0	0	0	0	0	0	0	0	0	0	0	0	0	0	0	418.106	0	0	0	0	0	0	0	0	0	0	0	0	0	396.470016
LPG(14:0)	0	355.5431269	501.2349221	0	0	371.4584515	352.4176891	0	0	335.7735296	349.8805006	475.7264557	538.8884412	621.125714	0	0	0	0	453.188486	458.9197683	0	378.0196918	0	376.2654458	0	0	179.6625078	0	0	0	554.7228807
LPG(16:0)	1031.374205	1470.128682	1517.676093	1063.967077	1662.261678	3066.471463	2022.548036	1836.800515	1842.160395	1634.874944	3144.107908	2350.868026	1149.875314	673.6134369	1378.859256	1308.797926	828.6712287	5434.81377	4349.989992	4096.917628	2807.622051	3190.493473	3483.834186	2189.67826	721.0632989	843.1908013	5518.429697	4139.434185	1668.56551	2370.658849	8750.663946
LPG(16:1)	0	272.7698263	391.8451236	424.5955937	628.250487	302.1589463	875.8155833	237.8952813	796.4460257	280.3249682	427.8885914	261.2279585	167.8238437	258.9781151	220.4579429	551.5084001	342.1591604	811.5450307	0	904.5615428	278.8871631	1057.780776	247.3571283	363.3525974	337.6645034	559.3391574	591.9512435	994.1080215	282.7280512	311.6979177	1073.957386
LPG(18:0)	2791.273265	3881.793114	5346.641508	4290.05328	4734.305703	3953.706228	4547.432325	7821.648948	3307.692353	2403.875294	2580.608597	3015.097591	2883.25508	3444.027452	3535.881152	4812.459856	2338.990308	6648.348362	2786.94227	4904.214138	4895.792599	9608.725024	4214.003669	7021.268708	4502.684234	3556.253546	2162.464979	6103.483051	2229.813597	1613.706961	5287.383918
LPG(18:1)	12316.24483	20366.53092	16410.46309	15961.28135	9498.329314	25204.35317	28492.11211	24136.0616	13688.04529	25958.92457	16320.10571	7806.191891	7715.63725	11227.52382	27992.60135	11945.78856	19978.75275	8543.738799	12760.40455	23966.34466	14693.06363	34354.15507	20439.88373	17302.97034	10128.4778	15305.29294	23608.64699	21921.62727	11789.11618	8480.630805	7044.199916
LPG(18:2)	5637.700969	11310.10886	10581.20896	9475.736783	4554.23377	11508.75662	9671.74927	10311.06888	8847.233018	4884.999778	5883.644395	2336.969084	2380.603877	6336.299971	10121.92159	3447.480003	5798.236899	3964.886072	7500.452505	15547.3433	5066.247815	4103.511351	10170.33145	18043.56362	3298.77871	6951.681525	7789.54042	9574.467948	8279.585863	4893.627976	6368.303071
LPG(18:3)	801.1554739	249.4164912	1075.240643	646.0805555	546.1494094	861.9399935	489.2863446	1683.893817	430.4501607	637.2243612	559.891598	828.9951832	339.3509724	440.9834062	0	507.1963562	0	1364.66145	246.3446016	460.7406999	1027.691556	238.5864035	2276.410317	1826.843022	485.4639752	409.7125589	1682.542037	505.3256162	247.7534628	198.6352482	771.703233
LPG(20:0)	0	0	283.1624127	0	0	286.1445727	276.4567122	414.8802468	171.1230398	0	0	307.3885883	0	0	0	415.8464853	0	412.7852274	598.1509319	431.1847352	706.7034162	0	500.1688421	0	0	285.1664876	382.051788	0	0	0	0
LPG(20:1)	0	0	0	0	0	0	1043.906255	0	983.2675592	0	0	0	0	0	0	0	0	0	1010.136102	1286.226573	0	0	0	0	0	0	1214.160132	1047.539612	0	0	311.1188619
LPG(20:2)	1575.182365	860.2697924	1122.949482	939.947037	0	0	1404.270105	1206.29178	910.8251862	845.9723811	0	2184.884019	1237.154126	548.5777536	849.5498419	561.9021149	436.6670787	944.2814323	0	1066.903466	590.4118902	1057.745036	1801.828843	1434.397192	1278.668617	1273.542997	1307.134081	937.6893851	606.4193122	533.8525366	1117.926434
LPG(20:3)	505.9806914	366.8410145	835.4344636	844.6500961	0	973.9891433	245.9429002	810.9383602	791.9640738	625.8953736	268.5212019	291.546461	389.7460777	1253.872179	0	0	426.4430842	1255.635523	352.4369385	444.9142357	282.4826337	508.2525383	594.340261	763.4683892	0	0	0	1107.190721	0	423.9676687	502.0563678
LPG(20:4)	513.3991934	611.537038	365.8114215	675.6236462	0	609.4478422	1100.108338	826.2025499	1365.631947	354.6000639	450.8271552	782.567232	0	0	695.2255817	647.5389275	327.6334701	247.7982586	0	674.0197614	453.9143147	774.244489	1113.920679	627.8665199	713.2215847	320.6003931	1558.597054	373.3936614	270.6713742	261.7035696	555.2703855
LPG(20:5)	0	0	320.407622	805.2282497	571.4524172	658.5345042	0	329.333832	435.3787761	622.4886979	692.4439228	0	254.4115217	0	502.3405947	905.296089	628.8093909	406.9704565	295.9809218	943.0979646	490.9134501	634.0106911	481.8755806	591.3200117	642.721316	713.2799188	981.0337509	391.6014332	152.9001686	149.0422885	967.7619971
LPG(22:4)	918.4372512	0	532.5020209	472.5643249	222.5000302	406.4704757	748.2461468	383.3872182	872.9329774	456.449808	1364.613929	284.6242086	0	469.6063656	376.7653051	0	0	0	647.1729222	351.9325117	580.6272795	0	320.2738422	620.8093658	547.1264717	211.5448531	928.9182998	1199.717094	225.6354232	0	252.2489785
LPG(22:5)	285.5792261	0	709.3656685	368.0999959	0	801.5450858	911.4132431	664.829931	620.7270756	378.1668308	553.4169061	288.4840104	431.8450949	0	0	0	0	401.4040803	840.3488553	604.4037498	1331.529964	1294.47663	752.2510853	1650.388364	522.8336846	669.3847401	0	0	376.7344784	0	1059.352797
LPG(22:6)	584.6850452	0	0	512.8731467	622.6765531	637.1857019	380.3789931	0	647.0384836	606.3908515	350.9216861	0	273.02081	0	0	0	0	364.03942	0	698.7248886	582.6507276	775.6149044	2192.238391	595.6567452	0	515.5999839	468.2545972	371.1653455	583.6449222	516.3992925	0
LPI(14:0)	0	0	0	0	0	0	0	0	0	0	0	0	0	0	0	0	0	0	0	0	0	0	0	0	0	0	0	0	0	0	0
LPI(16:0)	0	0	0	0	0	0	0	0	0	0	730.1783446	884.2537106	0	0	0	0	0	1634.297923	1041.299019	1323.966145	0	0	0	0	0	0	1565.926089	0	0	0	671.7654569
LPI(16:1)	0	0	0	0	0	0	0	0	0	0	0	0	0	0	0	0	0	0	0	0	0	0	0	0	0	0	0	0	0	0	0
LPI(18:0)	702.7269086	0	0	0	0	0	0	0	0	0	0	0	0	0	0	0	0	577.6143751	0	1142.216967	0	0	0	0	0	0	0	0	0	0	1003.511263
LPI(18:1)	0	0	0	0	0	0	0	0	0	0	683.4546378	1028.877307	0	0	0	0	0	0	0	890.7973322	0	499.7782283	0	0	0	0	363.9792434	0	0	0	0
LPI(18:2)	0	0	0	0	0	0	0	0	0	0	0	706.9645423	0	0	0	0	0	0	1002.052308	0	0	0	0	0	0	0	0	0	0	0	835.4235403
LPI(18:3)	0	0	0	0	0	0	0	0	0	0	0	0	0	0	0	0	411.3025	0	0	0	0	0	0	0	0	0	0	0	0	0	388.5024776
LPI(20:0)	0	0	0	0	0	0	0	0	409.1944214	0	0	0	0	0	0	0	0	0	0	306.6096058	0	0	0	0	0	0	0	0	509.4713517	0	409.032
LPI(20:1)	0	0	0	0	0	0	0	0	0	0	0	0	508.8251093	0	0	0	0	0	0	0	0	0	0	405.1539801	0	0	0	0	0	0	306.7590145
LPI(20:2)	0	0	0	0	0	0	0	0	0	0	0	0	0	0	0	0	0	0	408.7767602	0	0	0	0	0	0	0	0	0	0	0	0
LPI(20:3)	0	0	0	0	0	0	0	0	0	392.3600142	0	0	0	0	0	0	0	0	306.7739996	0	0	0	0	0	0	0	0	0	0	0	0
LPI(20:4)	0	0	0	0	0	0	0	0	0	0	0	0	0	0	0	0	0	0	0	0	0	0	0	0	0	0	0	0	0	0	0
LPI(20:5)	574.5707202	0	0	0	0	0	0	0	0	0	0	0	0	0	0	0	0	0	0	0	0	0	0	0	0	0	0	0	0	0	0
LPI(22:4)	0	0	0	0	0	0	0	0	0	0	0	0	0	0	0	0	0	0	0	0	0	0	0	0	0	0	588.5513221	0	0	0	0
LPI(22:5)	0	0	0	0	0	0	0	0	0	0	0	0	0	0	0	0	0	0	0	306.6087462	0	0	0	0	0	0	0	0	0	0	0
LPI(22:6)	0	0	0	0	0	0	0	0	0	0	0	0	0	0	0	0	0	0	0	0	0	0	0	0	0	0	0	0	0	0	0
LPS(14:0)	0	0	0	0	0	0	0	0	0	394.8201352	0	0	0	0	0	0	0	493.4074582	600.3908539	0	0	0	0	0	0	0	707.3798753	472.8893372	0	0	1000.625887
LPS(16:0)	3028.291119	965.7712875	1705.361574	2462.690446	3490.051495	0	2796.540646	790.4292148	2205.783433	2572.462986	2728.911694	1756.306533	0	0	357.3961198	1062.982592	1712.155947	3433.07059	0	392.4957904	2640.381727	2104.933064	2920.977481	2227.243361	1046.614898	1099.915282	1044.019826	1421.605305	1311.779399	0	2506.654816
LPS(16:1)	0	0	0	0	0	0	0	0	0	0	0	0	0	0	0	0	0	0	0	525.0439524	0	0	0	0	0	0	0	0	0	0	0
LPS(18:0)	586.36074	0	1247.015468	0	0	0	0	519.4173885	0	972.0802274	930.404091	586.6862523	0	0	0	974.2336901	411.3792322	0	1311.308709	625.5165278	0	1039.036175	433.3213284	1044.559808	314.2749489	0	497.7160964	0	927.2975567	0	410.2245081
LPS(18:1)	0	0	0	0	404.5157552	0	0	0	0	0	0	0	0	0	0	0	0	0	0	1120.469852	0	912.7166254	0	0	0	0	370.6414516	0	0	0	482.4689765
LPS(18:2)	0	0	0	0	1645.032511	0	915.5349571	0	0	1533.081025	0	1147.214813	0	0	0	0	0	939.3515298	0	0	0	549.2341875	0	1190.486599	0	0	0	0	0	0	0
LPS(18:3)	0	0	0	0	0	0	0	361.8625507	458.3084994	0	0	479.8555735	0	0	0	0	0	0	345.2248667	0	0	0	0	0	0	0	0	0	0	0	0
LPS(20:0)	0	0	0	0	0	0	0	0	0	0	0	0	0	0	0	0	0	0	0	0	0	0	0	0	0	0	0	0	0	0	0
LPS(20:1)	0	0	0	0	0	0	0	0	0	0	0	0	0	0	0	0	0	0	0	0	0	0	0	0	0	0	0	0	0	0	0
LPS(20:2)	0	0	0	0	0	0	0	0	0	0	0	0	0	0	0	0	0	0	0	0	0	0	0	0	0	0	0	0	0	0	0
LPS(20:3)	0	0	0	0	0	0	0	0	0	0	0	0	0	0	0	0	0	0	0	0	0	0	0	0	0	0	0	0	0	0	0
LPS(20:4)	0	0	0	0	0	0	0	0	0	0	0	0	0	0	0	0	0	0	0	0	0	0	0	460.7010204	0	0	0	0	0	0	0
LPS(20:5)	0	0	0	0	0	0	0	0	0	0	0	0	0	0	0	0	0	0	305.7086371	0	0	0	314.8581128	0	0	0	305.1966127	0	403.139014	0	407.0555866
LPS(22:4)	0	0	0	0	0	314.198	0	0	0	0	0	0	0	0	0	0	0	0	0	0	0	0	0	0	0	0	0	0	0	0	0
LPS(22:5)	0	0	0	0	0	0	0	0	0	0	0	0	0	0	0	0	0	0	0	304.9799953	0	0	0	0	0	0	0	0	0	0	0
LPS(22:6)	0	0	0	0	0	0	0	0	0	0	0	0	0	0	0	0	0	0	0	304.9872297	0	0	0	0	0	0	420.6669551	0	0	522.1231069	0
PA(14:0/14:0)	0	0	1526.441278	0	0	0	0	0	0	0	0	0	0	0	0	1018.614315	0	0	0	0	0	0	0	0	0	1010.168657	1615.733015	0	0	0	0
PA(14:0/18:1)	0	0	0	1045.043642	0	0	988.3549266	0	0	1048.824539	0	0	0	0	0	0	0	1001.901606	2191.115672	0	0	0	1027.983877	0	0	0	0	0	0	0	1044.176034
PA(14:0/18:2)	0	0	562.5258616	530.9928738	0	0	0	0	0	0	0	481.4231881	0	0	0	0	0	580.0847578	0	1700.57257	0	1007.5678	0	0	0	0	1622.852893	0	0	0	1143.483122
PA(14:0/18:3)	321.94989	0	0	0	0	0	247.2386985	361.0360413	370.5654014	0	0	0	0	0	0	1301.285528	0	0	0	0	0	0	0	229.7021801	434.938213	0	1083.409546	0	0	0	0
PA(14:0/20:1)	0	0	0	0	377.1816468	0	0	234.1259402	0	0	333.4086045	562.7242364	0	0	0	610.5211279	249.4134459	0	0	0	0	0	0	0	0	0	0	0	0	0	0
PA(14:0/20:2)	0	0	0	0	0	0	0	0	0	0	0	0	0	0	0	0	0	0	1094.268416	0	0	0	0	0	0	0	1065.43243	0	0	0	0
PA(14:0/20:3)	0	0	937.8471335	0	0	0	0	0	0	1049.346877	0	0	0	0	0	0	0	0	0	0	0	0	0	0	0	0	0	0	0	0	1573.64608
PA(14:0/20:4)	0	0	0	0	0	1045.976253	0	0	0	0	0	0	0	0	0	952.2315035	0	0	0	0	1579.398377	0	0	1044.973362	0	0	1057.344217	0	0	0	0
PA(14:0/20:5)	0	0	0	0	0	0	0	0	1578.580305	0	318.385395	580.173907	0	0	0	0	0	0	0	0	0	0	0	0	0	477.7479549	0	0	0	0	0
PA(14:0/22:4)	0	0	1036.166524	0	892.4038665	0	0	0	0	0	0	0	0	0	0	0	1053.834643	0	0	0	0	0	1556.106468	0	0	0	0	605.3882913	0	0	0
PA(14:0/22:5)	0	0	0	1506.080003	0	0	0	0	600.4838799	0	0	247.0226135	0	0	0	0	0	250.5329299	869.7086674	0	0	0	0	0	0	0	0	0	0	231.7339141	0
PA(14:0/22:6)	0	0	0	0	1053.522899	0	0	0	0	0	0	0	0	1587.107083	0	0	0	665.6990391	0	1154.85496	0	0	0	0	0	0	0	0	1048.73694	0	1182.524734
PA(16:0/14:0)	987.5945817	0	0	0	0	0	0	0	0	0	0	0	0	0	0	1079.566802	0	0	4175.488846	0	0	0	0	0	0	0	0	1040.099381	0	0	948.2473534
PA(16:0/16:0)	1002.194032	1286.630595	0	0	0	0	1269.365792	0	2051.548139	999.3602218	1003.592805	3017.84372	0	0	1168.402012	0	0	0	1561.991938	2090.503141	0	0	0	0	0	0	0	1190.75465	1017.089268	0	0
PA(16:0/16:1)	0	0	0	0	0	0	0	0	0	0	0	0	0	0	0	0	0	968.049547	0	0	0	0	0	0	0	0	0	1050.013404	1003.550157	0	0
PA(16:0/18:0)	0	0	0	0	0	0	0	0	0	0	0	930.7869612	0	0	0	817.5648089	0	0	1041.999337	0	0	0	0	0	1009.704412	0	0	1609.76527	1052.951701	0	0
PA(16:0/18:1)	9646.351398	0	992.5320637	9806.553303	3454.341901	0	834.3864234	1056.58469	0	9264.686548	0	0	879.4955322	1465.220815	873.6927744	0	1438.700525	944.8806852	2191.248935	1143.757389	4383.594912	0	4020.799338	1440.251772	2020.604605	0	0	2355.846688	2600.801243	0	0
PA(16:0/18:2)	0	0	0	942.2403587	1527.210334	1041.730337	0	0	1564.517714	0	0	1515.959693	1000.011693	0	0	0	0	1001.914305	0	0	1551.913481	1047.414821	0	0	0	0	0	0	0	0	1588.161185
PA(16:0/18:3)	0	0	0	0	0	0	0	0	1574.422001	0	0	0	0	0	0	0	0	0	1069.257885	1046.209766	0	0	0	1055.90788	1072.156513	0	1075.195269	0	0	0	0
PA(16:0/20:1)	0	0	0	0	0	0	0	0	0	0	0	0	0	0	0	0	0	0	0	0	0	0	0	0	0	0	0	0	0	0	0
PA(16:0/20:2)	0	0	0	0	0	0	2042.279871	0	0	0	0	0	0	0	0	0	0	0	1059.637793	1046.209766	0	0	0	0	0	0	0	0	0	0	2041.073569
PA(16:0/20:3)	0	0	0	0	0	0	0	0	1047.278737	0	0	0	0	0	0	0	0	0	1062.092193	0	0	0	0	0	0	0	0	0	0	0	0
PA(16:0/20:4)	0	0	0	0	0	0	0	0	1035.23242	0	0	0	0	0	0	0	0	489.4910676	0	0	1054.10551	0	1018.95569	1419.451817	0	0	0	478.0431549	0	0	1567.612635
PA(16:0/20:5)	0	0	0	0	0	0	1053.259437	0	0	0	1039.655804	1544.484767	0	0	1055.009384	0	0	0	0	0	0	1019.950409	0	1001.355347	0	0	1079.31435	0	0	0	0
PA(16:0/22:4)	0	0	0	0	0	1054.213511	1196.522324	0	855.6357307	0	0	0	0	0	0	3151.695878	0	0	1048.098304	0	0	0	0	0	0	0	0	0	0	0	0
PA(16:0/22:5)	912.2598844	0	0	0	0	0	1042.980198	0	0	0	0	0	0	0	0	0	0	0	0	0	0	0	0	0	0	0	0	0	1057.280756	0	0
PA(16:0/22:6)	1572.868432	0	0	0	0	0	0	0	0	0	0	0	0	0	0	1027.168238	0	1049.412509	0	1051.41762	0	0	0	0	1053.938413	0	0	0	0	0	1016.29261
PA(18:0/14:0)	0	0	0	0	0	0	0	0	0	0	0	0	0	0	0	0	0	1390.912839	0	0	0	0	0	0	0	0	0	0	0	0	0
PA(18:0/16:1)	1540.106836	1010.271441	2532.071526	2020.310091	5566.617704	3028.995903	3508.102364	3136.065275	2077.276642	1533.356787	477.1716753	1518.033297	2001.441375	0	1501.738442	7835.26788	2021.724953	4049.634685	2737.955087	1615.904671	5063.67498	5937.858499	5383.703907	1518.368699	2524.927703	2526.079218	2622.832814	3991.557679	3492.060292	3994.258812	6167.821973
PA(18:0/18:0)	1926.485253	0	2529.632795	5214.476293	3498.477369	0	1368.46304	2286.45248	1428.718679	2065.400239	1485.609803	2056.625083	1993.519194	0	1011.997433	5328.782698	2713.607007	1143.496196	1562.758562	2615.564426	5054.094922	1303.98703	4098.21848	1977.797912	2544.498349	1561.380792	0	2991.881304	1464.375994	1027.497233	2847.75414
PA(18:0/18:1)	72927.79732	51762.03767	111740.8111	126467.2931	198661.1543	55167.8497	107055.4694	92792.56911	76642.43948	77379.20649	59037.69493	74208.54931	35571.05324	47950.20515	87658.28496	248772.9462	77625.03805	124788.8366	99180.64594	87102.33385	180692.3147	140900.0001	180089.1795	130726.7914	45470.82578	108143.3418	78839.08159	93574.16092	121172.6269	57364.10664	94269.01531
PA(18:0/18:2)	185993.9549	71444.03167	271085.8233	150967.4624	486398.124	109568.8114	144833.062	99191.44111	139520.5808	146895.0577	111424.0297	244178.588	64831.22701	64961.93321	131980.8056	322023.5144	168122.7751	407135.6932	317578.0429	151509.5539	295618.6188	237023.4952	470277.0672	546572.0448	46985.09706	278753.648	91176.16161	151050.2952	194295.3547	36664.16392	220965.6474
PA(18:0/18:3)	1004.60036	0	4041.905208	3530.542288	3527.946016	1028.063097	0	0	4485.386253	0	0	1542.637142	0	0	0	6031.645265	1515.950336	8415.806494	7978.913286	1581.846916	2502.250684	2020.783138	7593.547538	8614.981137	0	3605.98837	2623.105337	8177.367312	2792.344325	2019.575723	1568.35782
PA(18:0/20:0)	0	1027.737329	2667.861773	1689.651032	3014.422452	1529.484025	3937.1275	5018.518363	923.7783944	1037.159087	3561.677518	0	0	0	2030.749193	5256.212009	1552.734987	2058.260902	4342.277587	4631.906011	921.287111	2981.03287	7180.474778	5924.684258	1529.920947	1529.035664	3135.818373	2349.850065	1507.017483	980.805676	2066.932593
PA(18:0/20:1)	1551.627553	1022.578285	4888.126548	3571.614863	3527.882546	3060.294763	2528.013725	2423.198636	2541.970428	2587.163749	1028.922676	2564.516632	2004.306213	0	1525.57578	4563.209886	2565.42288	2306.153509	2604.757052	3658.575516	2544.887524	3522.330579	2557.586604	3061.202082	2384.317869	1033.278509	1045.877644	4053.570042	4011.624196	0	994.074372
PA(18:0/20:2)	4647.884313	3091.633969	3013.153058	1868.946595	7657.855019	0	1283.206607	4064.411075	4807.752184	1033.474838	2056.309081	1886.67139	1009.298536	1542.706093	2543.388705	8134.461497	2551.811523	3963.808661	1427.116703	1569.648216	5234.076035	4213.057507	9707.30127	2318.79736	0	3560.461289	3624.516896	4572.492432	4523.676227	1495.054086	1953.081231
PA(18:0/20:3)	52863.23709	18152.66397	69450.78088	62349.0782	125192.2955	33473.35274	56892.87163	53664.49543	36563.12611	30762.4618	27310.64089	60670.61146	15226.27229	23883.90296	41049.55797	144776.8677	34752.58137	59825.76173	101977.4428	46469.42892	100353.9197	63644.19366	99657.01127	83723.72077	18579.98957	75917.28466	34874.29543	66438.58246	88374.49154	18468.97891	72762.41892
PA(18:0/20:4)	544854.0557	163792.1632	568061.261	793151.3108	1085085.376	268517.36	633694.941	644133.4578	381666.0378	363223.0815	236001.5942	669324.3663	181978.2276	195937.8955	587528.4597	1335379.986	423276.7218	655592.6612	618502.5684	512321.7855	941778.0706	634421.1254	979168.5806	601149.8399	204271.3591	637964.1742	406755.0243	583110.4365	785834.2469	295139.8256	813575.2229
PA(18:0/20:5)	23552.46647	0	7241.381007	8846.126987	14039.97255	2605.311618	7261.684548	4670.147075	16424.35517	10152.56965	6193.051074	8991.156262	1536.369146	2047.950248	2068.088693	14815.92554	6243.288359	12908.78075	3963.34311	6793.54184	14567.43934	8294.051394	57248.10286	10243.24539	2602.405688	2083.466921	14043.79575	42919.3452	15411.48691	4106.812651	28947.16453
PA(18:0/22:4)	86805.95693	37213.44633	127007.5907	306563.0055	235160.2093	67662.15452	109227.682	257832.8598	78803.35737	83625.32735	71440.34579	170107.3521	52308.2323	63880.72538	124094.2296	363909.383	90813.90777	105182.6151	69038.80953	75793.59207	401481.2344	164329.3002	204336.3147	96774.41436	59340.13992	194799.4831	175107.0505	107117.905	187405.8828	143931.227	191938.667
PA(18:0/22:5)	82762.05241	21885.79551	84505.80914	114396.2459	159001.4123	44718.3595	122398.462	82143.07005	81815.5253	83403.6915	48035.64118	79324.32292	40408.07129	32953.90429	67201.82922	269063.7296	67585.00444	101511.3441	79282.20833	68093.01292	188551.5816	98117.10347	193104.1942	104565.6954	21068.2817	54888.71967	59503.15434	62394.57639	81116.09305	58789.60273	145197.2563
PA(18:0/22:6)	61821.53653	14477.93365	57964.0677	60913.78614	109374.6713	12467.31396	90046.71077	56810.35058	69774.31707	60008.6378	33141.90914	51543.82744	19173.87479	25852.61053	44682.82872	65806.72102	43258.81631	48717.28986	57636.28148	55733.45082	62792.20518	83883.36556	116030.8853	63703.55244	36500.99449	15117.73335	42428.2158	44874.9049	42584.60033	28348.25925	79056.67799
PA(18:1/16:1)	0	0	1065.705651	1542.738849	0	0	0	0	1036.717785	0	0	0	0	0	0	0	0	0	1568.490604	0	0	0	0	0	0	0	2089.902516	0	0	0	0
PA(18:1/18:1)	1549.421389	1505.947449	0	0	1513.42934	2023.923858	3035.663432	0	1514.817957	1543.492429	1885.971369	0	0	0	0	0	1018.642132	0	0	2644.755612	3530.155966	943.2870495	1420.647285	5792.688677	0	0	1556.036812	1495.38302	1072.018231	1002.959221	1545.917528
PA(18:1/18:2)	0	0	0	0	2526.034685	0	5064.001325	0	2525.894543	1547.31452	0	1007.970309	963.3448094	1494.571658	0	3878.911708	3007.909398	6640.044189	2923.21044	2105.455872	3158.477993	1010.584442	4562.097685	4508.022475	0	2018.374777	0	0	2390.013067	0	2297.720133
PA(18:1/18:3)	0	0	1036.166524	0	0	0	0	0	0	0	0	0	0	0	0	0	852.8667891	0	1077.833028	0	0	0	0	0	0	0	0	0	0	0	0
PA(18:1/20:1)	0	0	1012.848651	0	0	0	0	0	0	0	0	0	0	0	0	3014.003094	0	0	0	0	0	1041.885431	0	1043.569186	952.316509	0	1046.081429	0	0	0	0
PA(18:1/20:2)	1565.421767	0	0	0	1052.751404	0	0	0	0	0	0	0	0	0	0	0	0	0	1070.257029	0	1568.46134	0	0	0	0	0	1083.297496	0	0	0	0
PA(18:1/20:3)	2570.487002	0	0	1052.528344	1043.683456	0	0	1513.388705	0	0	0	0	0	0	0	1031.423741	1015.959192	1034.918972	0	1046.209766	0	0	1016.739033	0	0	0	1086.041022	3067.913674	0	0	3660.255389
PA(18:1/20:4)	3117.082478	0	2054.940873	3236.349957	6092.718279	1564.080591	9288.759179	7774.453745	7797.393154	4161.382362	1913.152268	9167.560728	2030.546797	3596.135475	2071.823645	6167.586425	3229.950218	2995.225664	4176.704642	2780.096217	4546.546366	4446.55771	9370.979956	2992.993885	3125.442668	0	2580.698666	3426.621037	2555.025711	1022.312295	4417.41471
PA(18:1/20:5)	0	0	0	0	0	0	1013.79659	0	1044.913838	0	0	0	0	0	0	0	0	1008.314787	0	1082.976562	0	0	0	0	0	0	0	0	0	0	0
PA(18:1/22:4)	0	0	0	0	0	0	0	0	0	0	0	1032.867758	0	0	0	1552.613134	0	946.3320934	0	0	0	1563.029906	1561.589741	0	0	941.7771353	0	0	1007.697978	0	0
PA(18:1/22:5)	0	0	0	1053.327138	1017.255724	0	0	0	1527.486866	0	0	1547.201573	0	0	0	0	2086.424651	1037.475335	0	1082.743754	1563.791588	0	0	0	0	0	0	0	0	0	2306.401658
PA(18:1/22:6)	3135.951515	0	0	0	1573.335681	0	3104.675597	0	2605.686589	1425.768261	0	502.1369879	0	0	0	0	0	1028.804178	2190.813774	2082.404208	1040.91138	0	2592.496609	0	0	0	499.9052672	0	0	0	1050.795635
PA(18:2/16:1)	0	0	0	0	0	0	0	0	0	0	0	0	0	0	0	0	0	0	1072.236695	0	811.0118588	0	0	0	0	0	1011.956291	0	0	0	0
PA(18:2/18:2)	0	0	0	0	0	0	0	0	1008.844383	0	0	0	0	0	0	0	0	0	1103.492378	0	0	1042.962192	0	0	0	0	0	0	0	0	0
PA(18:2/18:3)	0	0	0	0	0	0	0	0	0	0	1008.048063	0	0	0	0	1047.563632	0	1039.855987	0	0	0	0	0	1027.091792	0	0	0	0	0	0	940.8316594
PA(18:2/20:1)	0	0	0	0	0	0	0	0	0	0	0	0	0	0	0	0	0	0	0	0	0	0	0	0	0	0	0	1221.423036	0	0	0
PA(18:2/20:2)	0	0	0	0	0	0	1719.292068	0	0	958.9015309	0	0	0	0	0	0	1132.491247	0	1615.941571	0	0	0	0	1088.150622	0	0	0	0	0	0	0
PA(18:2/20:3)	0	0	0	0	0	0	0	0	0	1020.296915	0	1572.423653	0	0	0	0	0	0	2090.623886	1070.917702	0	0	0	0	0	0	0	0	0	0	0
PA(18:2/20:4)	0	0	1537.037392	0	0	0	1555.379587	1036.564874	0	0	498.3505887	459.2910148	0	0	0	2558.927581	1046.966397	2578.119935	1567.830363	1043.24895	0	2074.747004	2206.87572	0	0	1014.001172	0	2551.229406	2901.319052	1004.880237	1046.769642
PA(18:2/20:5)	2096.649758	0	1009.856716	0	0	0	0	1563.624984	0	0	0	0	0	0	0	0	0	0	1098.866464	0	0	1042.962192	0	0	0	0	840.7187187	1018.910175	0	0	0
PA(18:2/22:4)	0	0	1044.867388	0	0	0	0	0	0	0	0	1033.717738	0	0	0	0	0	0	0	0	0	0	1548.411324	0	0	0	0	1012.082869	0	0	0
PA(18:2/22:5)	0	0	0	0	0	0	0	0	0	0	0	0	0	0	0	0	0	0	0	0	0	0	0	0	0	0	0	0	0	0	0
PA(18:2/22:6)	0	0	0	0	0	0	0	0	0	0	0	0	0	0	0	0	1044.75814	0	0	0	0	0	1563.649358	0	0	0	0	0	0	0	0
PA(20:0/16:1)	0	1003.161649	8057.24727	9747.355642	19201.95847	2889.984396	6763.441754	10580.73412	1493.435552	2581.501044	9757.710517	5120.775206	0	1513.031781	12673.70733	21257.75637	7136.162655	11210.98808	2595.980815	4621.944877	8723.161368	11624.00404	11192.89471	6551.892405	6384.025697	4802.86642	9045.181165	4479.29574	4734.662152	6542.847125	10159.81415
PA(20:0/18:1)	89328.93711	23758.63575	109962.8677	109602.6751	196712.4986	22940.1982	123310.4198	94452.02158	41331.72584	49403.39503	54687.29366	66125.43748	36041.30956	32087.82733	79545.37798	209867.463	68584.73792	120710.1548	100143.0649	72290.70436	148024.8403	158935.7414	161961.0906	134845.8435	34594.1152	63489.44802	68575.6882	83794.52725	128124.3416	25040.3469	84214.48739
PA(20:0/18:2)	240720.7992	84854.16256	522515.8431	288739.4707	876424.8944	125517.6306	288999.7361	224414.5632	199667.9353	302193.7408	155051.8879	320527.0426	86020.59486	115729.9098	204167.769	473124.6838	276883.4026	640168.1647	517544.0727	243686.6027	470574.3004	429038.368	800503.9252	726430.1486	78949.23189	315581.8408	159299.8306	217529.312	324113.6089	79065.78784	299898.559
PA(20:0/18:3)	3043.380265	1039.164124	3767.03898	3119.069015	6259.368425	1030.273	1852.590477	1997.743096	2033.445423	2802.53814	0	3090.354829	0	0	1544.918072	9616.626925	4360.506748	7493.048976	3441.998245	4495.002079	10280.69679	4585.154111	10037.76882	5224.426562	4127.45576	8128.60316	5157.67479	18347.08195	5618.275443	1020.193561	1935.499103
PA(20:0/20:1)	1345.151527	0	2729.121333	0	0	2840.819251	923.2252556	1952.8135	1554.070276	5675.056505	0	2061.141869	1523.999806	0	1022.120552	8131.80423	4154.606559	3844.095838	1044.065865	474.3166826	2049.59575	3311.45983	4123.878263	1531.2122	1560.940326	2038.210301	4695.220777	1012.464227	2524.37057	0	3124.758538
PA(20:0/20:2)	1958.484731	1239.645396	5875.482433	1551.037531	9172.418395	1029.434757	3548.385288	5205.4892	1528.303187	2464.965917	0	3961.54517	1042.072984	0	2064.793871	1767.510635	4736.729588	3770.756004	4130.399582	2603.115068	2368.252731	3633.796371	9363.600347	4509.686466	2075.838943	1541.301957	1514.011954	2757.169504	3612.172221	1044.515036	7844.118125
PA(20:0/20:3)	94502.46334	9762.946517	114805.8316	104726.2477	179391.8632	21854.58007	135979.7688	100027.2283	44539.96929	41460.13285	24557.30216	93668.57562	21180.08653	20442.39145	87468.41847	166808.3667	56732.07929	109842.5341	151898.4066	70847.89557	134891.8286	131754.0835	187257.1457	113551.8788	27691.01898	72217.85378	62261.29307	97565.01679	106731.4912	21149.42971	85488.33671
PA(20:0/20:4)	838187.4613	236888.3356	1209949.464	1361746.154	1871425.471	334593.7616	1453153.707	1274341.082	496195.2774	524233.8904	291179.7108	1294487.963	292569.5993	316358.3929	1236022.977	2118040.082	921771.4498	937752.1896	1148432.87	736697.5745	1609688.439	1047029.896	1688908.052	903915.5797	466551.5504	791422.2614	769742.3955	1050298.777	1288683.615	482597.681	975963.9308
PA(20:0/20:5)	46630.37366	1541.784119	39095.27543	25017.70093	36056.38398	6262.413631	41180.84172	17284.18965	24471.35468	37586.40244	9825.207666	30645.14017	11385.72489	8701.411567	12475.54583	20271.90517	28677.97565	24597.64491	13746.12807	8337.868573	26981.07537	20331.2675	110577.2199	17549.96984	6785.470498	12231.49987	39828.09181	125393.7527	26590.89735	4675.596707	42001.14524
PA(20:0/22:4)	54157.21371	33939.57019	168717.3148	326289.9911	208556.087	27150.20551	76049.41896	242874.6634	44425.35957	40643.08211	36743.92714	153823.9158	54527.9577	65048.18572	134764.3847	425868.7122	93430.41418	74256.39846	50086.09093	65585.67325	406243.512	130191.5874	157099.7417	65687.57837	78719.67868	118212.5427	219388.439	77656.49172	152043.5591	108590.8753	123536.3556
PA(20:0/22:5)	64749.15205	12911.25015	70327.54031	116755.3694	121119.3755	14510.98054	93354.33063	65264.72206	56023.32089	40987.37839	39657.609	76883.34965	36705.98035	42083.46375	80685.3344	226083.2504	59942.50806	59549.54942	67641.42037	53684.60963	194302.974	79045.90396	128251.8701	81957.07657	54286.16552	41166.01477	73456.65997	57938.64785	98486.26757	52150.73344	105365.2385
PA(20:0/22:6)	56348.94143	14603.46804	82204.5277	68634.17171	172129.6666	10180.23388	130077.4617	81929.12652	65068.9767	53924.67382	33639.67631	59687.4984	31387.84839	28646.08826	64956.91669	89078.39997	76032.7363	65297.8142	77718.1737	68976.85977	69815.57911	90372.45475	204110.0775	72605.96757	42966.52047	17512.65032	62028.22602	56157.80512	68125.26581	21181.532	74814.67736
PG(14:0/14:0)	425.2019428	611.7967841	0	0	0	0	0	0	0	0	1130.862848	0	0	1150.612522	0	0	0	0	889.0211581	0	0	962.0353004	0	0	0	0	565.270617	252.0735262	257.0718696	400.8212779	755.0634619
PG(14:0/18:1)	394.9163998	0	1188.742496	560.9181686	1666.294994	0	2458.054063	961.5265619	1699.691228	1576.381549	1852.640575	1101.782425	414.4320415	692.3010561	1485.355956	2480.273241	558.6582468	1580.671262	1332.283793	2070.728163	646.7450906	1600.603927	1431.827061	649.3494523	415.5720261	420.5923099	1457.751608	1364.980362	1344.057737	416.7736949	1679.028499
PG(14:0/18:2)	1034.531858	553.4708531	2635.263098	507.7837018	1461.137495	276.8350444	699.3773049	1114.801313	691.4818907	767.0509524	659.4143117	900.4959756	0	386.3998645	967.9237321	2568.359432	1381.664899	2754.808925	803.4936832	1536.551758	1527.142981	1103.446198	2225.616814	2209.627724	275.531231	827.5189307	1481.824018	772.5914293	1682.483414	0	1921.577523
PG(14:0/18:3)	0	0	0	0	0	0	0	0	0	0	0	0	273.3906593	274.7752516	0	0	0	383.24	293.8004842	0	0	401.7285982	505.5601207	0	0	0	660.0671582	400.3837178	533.5462562	274.8335859	858.4541104
PG(14:0/20:1)	609.3003262	0	660.077293	0	0	0	0	0	0	490.3081079	0	0	0	0	284.585126	373.1639866	0	0	0	0	0	0	494.9311	0	0	0	0	744.3107697	266.3243986	279.1022229	0
PG(14:0/20:2)	0	0	0	0	0	0	274.4807121	387.6068513	278.4442002	493.1685701	0	656.7360698	268.9748026	0	0	272.0782434	0	0	0	369.1913928	957.4756033	407.2346501	276.4966434	0	275.4387493	0	0	0	0	0	398.1537248
PG(14:0/20:3)	0	0	523.8508815	558.4909781	0	423.511585	0	0	415.2032862	535.9964471	535.6276479	0	0	0	408.1412376	1631.069965	0	669.2122134	0	0	546.117545	0	708.365016	277.0003075	280.1005151	0	0	507.8381254	0	481.343123	0
PG(14:0/20:4)	592.9445436	529.1655057	3675.84556	1526.762504	1373.790599	0	876.4350368	1028.692763	1117.873092	0	1465.56616	3327.301613	544.0672015	267.6745771	1697.375529	2507.023872	1399.1974	1775.795388	2397.117406	1716.933928	1704.603508	549.6468797	1689.077023	962.2204029	419.2176735	1392.834399	914.3080419	0	0	0	1296.201038
PG(14:0/20:5)	0	0	0	0	0	402.9836716	534.2427814	0	0	0	0	0	0	0	0	0	307.8350435	0	0	0	0	0	0	523.9270102	0	501.1618742	0	0	0	265.5473286	0
PG(14:0/22:4)	377.6864214	0	0	0	0	0	0	1260.399399	505.4771557	497.3025702	0	0	0	396.3676881	407.3725767	1128.558881	0	0	890.7519789	488.1272705	516.5481151	0	505.6047376	0	0	499.1781849	927.0687383	0	862.4009929	558.7951167	652.337872
PG(14:0/22:5)	512.2124309	0	999.9507039	0	620.7119028	0	752.424684	0	756.9578876	0	507.3385733	1014.720448	0	0	697.5000763	1240.796351	508.2338349	1008.292937	0	0	0	501.8862508	502.9113486	749.4373581	0	504.6676446	0	563.2283245	273.6141142	271.6040832	0
PG(14:0/22:6)	632.1495338	279.7559103	1536.762788	263.2373153	410.4260527	261.3396187	1254.865491	837.5725972	847.4393308	642.7089013	671.7653157	936.2425013	0	562.9929394	278.5966138	549.6163573	0	805.5169416	1576.223419	727.8000967	1380.351448	414.4454575	1258.167492	0	830.6164032	279.5121418	546.0957931	268.1865853	553.7422497	0	1591.525368
PG(16:0/14:0)	1365.506615	0	811.652666	955.8522169	935.7850643	414.962776	6579.023838	635.3056508	1910.93186	0	1028.832304	1616.800463	0	793.8041711	956.3020348	0	552.8570284	1145.591838	0	1207.59482	819.3494599	940.8799044	1372.705134	488.9676866	413.3872009	270.3202272	653.4842254	16255.45892	1314.780513	0	2938.814595
PG(16:0/16:0)	9137.174507	5646.82639	11938.99683	12774.64128	10753.59711	4605.419878	28159.96238	17897.24307	9956.599013	3058.859267	7113.658801	6795.666654	4801.332043	6246.937758	10667.96924	10574.62999	6607.057377	6007.188068	3156.843793	14843.988	9713.038449	9419.178551	8383.172392	6563.929587	11789.80361	3755.351088	4986.361114	39727.12167	13238.83246	4909.874885	16650.41366
PG(16:0/16:1)	3553.718463	1110.760204	4807.162942	2095.982047	4477.060044	2225.197172	23813.25557	6291.454827	6006.555241	3122.306383	6752.096659	3359.380467	1780.417731	2319.321812	3573.412751	1925.778939	698.7648699	3176.056373	1315.213603	6009.368019	1183.680252	2649.355888	6191.418259	2370.802395	1809.906714	0	2210.06911	71049.49911	6585.070485	2859.172146	8135.622443
PG(16:0/18:0)	4860.645933	1257.334341	9401.600546	10450.81524	12074.46571	1818.471319	16042.21921	13112.42728	7538.301282	3341.725783	6857.682218	3585.06926	3353.272141	3351.419785	8041.198124	6911.901802	1350.574449	6182.381664	3157.15751	4594.035422	9538.334835	4822.407288	8577.833571	7182.563788	4062.864538	2768.419881	5669.0953	10348.60444	7425.14636	3488.672809	11276.9051
PG(16:0/18:1)	58690.04685	34034.77769	221874.4858	149910.3705	128517.0678	26559.54731	350980.809	256874.7896	173788.0612	119179.1977	208493.4863	120981.3674	84233.81875	84434.08749	244915.4845	201334.2279	85529.27085	111894.9953	84525.34374	157328.0509	99246.44892	156738.9694	182609.8701	73990.82949	131011.1753	25411.23121	163393.0737	297996.4528	125877.7138	75888.6634	144540.1788
PG(16:0/18:2)	27214.22015	9490.771328	45328.75788	38617.31032	41980.02012	6145.656327	111905.7424	68097.6705	35593.9461	24803.52605	50268.94794	32457.47074	18753.86866	21011.52212	48811.79583	45492.45613	21101.98949	46834.57957	24536.36341	52833.93137	27347.36368	26132.07204	50315.73653	49527.6874	32585.39905	13407.6	18176.69439	118727.1227	53017.05726	22592.95898	51931.92148
PG(16:0/18:3)	0	265.5626545	695.2539023	1820.58932	1919.319781	417.3793557	2124.599704	1531.6293	520.9241209	0	1053.533001	399.196628	267.5019989	543.4161006	1528.239397	1398.469574	679.8577583	2115.265	0	1533.00049	837.3665868	277.197419	1671.773866	2220.217176	0	0	0	2370.878927	1113.726277	0	697.5187611
PG(16:0/20:1)	805.2859152	282.9133006	1536.581153	834.3338842	1531.555368	277.0892598	2362.005155	2365.810276	1952.467446	507.3299339	937.9504678	1469.124214	938.8915879	0	2005.08833	2591.380107	698.0641135	2808.581495	521.1690672	908.8242772	1113.512928	2373.10517	1806.19108	558.5602687	2098.253305	418.4355262	1563.072038	2171.964482	1065.694927	1053.198086	1826.268464
PG(16:0/20:2)	12371.23095	4176.974747	18360.50596	15756.81279	17504.37132	2232.083333	32339.01064	8909.057128	21554.4838	10479.32309	16506.01036	13719.31911	10873.0544	11219.44039	21755.30634	19209.69976	5249.434582	17447.72945	9562.49813	14466.16157	13576.25665	21231.60911	21741.89624	10643.04682	15673.70464	4190.691637	16914.14636	20505.94052	12166.98903	6568.699648	22148.32821
PG(16:0/20:3)	1868.647773	0	2336.243108	3404.106694	6403.486794	418.3312707	4759.670092	2430.289829	4702.008449	804.88354	4058.596623	2203.482405	2211.780205	1941.603368	4936.487202	2208.411864	1519.177573	7066.64498	2126.079811	8703.701272	3445.606301	3619.412322	11233.06244	6850.837101	2095.930384	539.704205	3660.466883	2890.041893	3788.961558	701.0423778	4531.289949
PG(16:0/20:4)	7230.850137	1193.023754	10345.87552	7348.232194	14714.40748	5381.216211	22458.52499	25192.92934	9729.186676	4912.525407	7308.814458	9849.744913	4724.691002	6459.556671	20001.90629	7936.131259	4333.462115	17619.586	10082.56406	21355.22843	14655.06119	5966.644658	15716.48373	14993.8256	5431.510414	5283.372161	9805.183874	22920.87687	19856.16667	3272.789644	27197.10107
PG(16:0/20:5)	532.1919527	0	0	0	1091.719062	550.23433	686.3868894	0	543.4450341	0	0	0	281.2536316	0	416.3667772	0	548.5853512	533.8530718	541.0845086	0	1229.239383	403.1722323	275.206599	818.0083797	274.6606063	0	1334.603832	964.009701	408.4639764	0	1071.252468
PG(16:0/22:4)	0	0	672.5162202	2203.834238	0	822.2765127	551.4498294	686.7475852	0	405.994953	534.1582095	934.7839309	265.6143823	408.2964567	695.4506702	1373.778109	0	667.8558293	0	0	1511.006533	551.5127337	0	0	691.0772834	413.4960963	1184.435453	1214.456621	532.6850653	400.1784879	796.556291
PG(16:0/22:5)	401.9950349	0	574.7624505	1661.098064	1652.335551	0	1245.707193	0	542.5242267	0	1204.688496	398.6904652	871.2056935	386.0011063	704.8034907	1365.720031	0	0	0	1141.438713	675.4738524	277.2105388	846.8535709	412.5549835	699.9984669	830.7811016	725.6354372	1370.500247	621.2261629	0	948.3962367
PG(16:0/22:6)	482.6365514	0	780.7515038	411.3029816	0	0	415.5690929	1639.104558	690.2579609	0	968.0170329	726.2777479	529.7987294	380.5139936	747.8033614	884.8993169	703.6418767	484.0145483	1081.250647	1141.924488	273.862132	0	1108.899125	1105.422039	959.2390672	0	1030.00342	1388.493664	1153.711015	0	2490.738513
PG(18:0/14:0)	0	0	837.4912142	258.6844961	837.0160035	423.3929566	983.968719	841.7124687	417.3677114	717.6814208	482.2835684	690.6138266	0	0	825.0975276	259.955357	0	735.4667154	0	900.9658001	562.788511	560.061599	1397.587422	693.627236	415.6871678	260.8460402	539.2604928	4649.107426	397.0349482	264.5827973	1708.887746
PG(18:0/16:1)	2285.655045	417.6426842	1260.803156	2267.117547	1688.661458	699.0213714	8233.50909	3202.960709	3125.61699	0	2137.990777	1205.729484	0	954.4195585	1261.30092	2094.13006	545.9964563	1201.053483	1043.747239	502.5840182	1252.727046	1945.476913	1111.882278	1115.633038	0	0	633.5275756	15079.54927	3289.059737	820.6802359	6593.556864
PG(18:0/18:0)	2137.036154	1115.763356	7490.935554	4758.467393	3460.776772	419.3609649	5338.038603	9829.81583	6946.503674	2959.076957	5395.637519	2566.963555	2092.440576	1963.599375	4555.777085	7686.137865	2235.258682	2260.02216	3368.868784	4501.795838	4290.048905	3933.365846	4041.136833	3333.362157	1938.271994	0	4579.675795	10155.58192	3508.101722	2489.512859	6162.709534
PG(18:0/18:1)	53550.03238	19757.24687	130895.1153	99438.60244	55800.78839	8807.078277	133821.4238	238346.7521	116448.4376	52338.91491	109367.8513	52988.23936	55779.99651	25196.27399	101616.2017	99863.42157	33259.22804	51299.17885	61361.69215	106450.7861	72921.84511	65965.87078	86118.8006	45867.59704	51866.9054	12510.11576	103752.1913	183116.5359	70837.97893	35373.65042	115915.1576
PG(18:0/18:2)	50131.10766	17950.83994	77720.52729	107536.7659	65388.74754	8556.955684	143926.1449	126880.7538	96176.16165	57190.64717	109312.037	83004.41258	41942.76382	31112.07286	91063.05572	101131.4868	27240.61345	81847.27128	59391.65526	75804.85889	63869.63091	56478.82662	75496.33638	69247.234	79927.91984	19697.31167	101648.2016	164805.9729	98074.19457	34380.67859	114264.4217
PG(18:0/18:3)	0	0	969.4560702	2082.004382	992.3467878	0	3067.202253	836.5855645	415.0370616	612.213595	1696.359944	0	0	255.6310328	831.2021771	979.3152568	280.0279294	1576.561205	977.1396551	1341.026244	694.746394	272.3918742	1388.62384	1816.148563	0	418.7972462	1126.874765	1044.253038	409.1611428	0	1339.882847
PG(18:0/20:0)	554.559183	0	951.0663453	0	641.1405898	0	817.3287088	347.7759003	477.9104495	1129.901509	1797.118907	897.6384566	0	829.8657608	644.8031556	1506.333766	628.7834711	560.2519162	962.1930708	1162.433797	476.1857214	689.0302949	503.551768	586.4381555	875.97674	477.5680277	1713.672374	1570.518283	1877.506561	580.1722552	1772.771317
PG(18:0/20:1)	936.5446138	416.0637496	1107.339856	1802.173037	416.6249896	555.4257305	1660.239947	1663.753029	2909.877557	531.8640863	0	0	0	674.9368493	832.2160213	1110.014889	275.6949478	1999.286834	1005.307694	508.061537	1107.192121	1108.591998	1944.631738	556.5724184	833.2203925	277.0397747	756.8821976	2048.1327	1503.63165	521.9350841	2901.726691
PG(18:0/20:2)	8258.942376	3331.725966	9745.215433	8498.830787	7115.644808	0	11449.9414	11983.61139	11632.25662	3745.601267	5010.915253	6096.338052	7766.631404	1516.597917	8460.394907	8984.002624	3755.9317	8583.725214	9349.592307	9795.985243	7736.138462	8730.980005	11302.09654	4272.579605	5686.860205	1246.621017	9263.890315	21520.35046	5254.234357	6171.21499	18570.2466
PG(18:0/20:3)	3393.410499	693.3838853	1799.205862	5556.553532	3709.231639	552.7213068	5193.476798	2318.921871	4021.657093	2008.115869	5347.933528	2373.299672	1022.290815	972.9062182	2738.951439	2601.105512	1381.098741	5203.845666	1069.540038	3417.227126	3402.798602	1802.144344	5799.442436	3428.150617	833.844894	853.1691041	2924.122586	5065.579756	6519.024379	1463.111372	8570.425066
PG(18:0/20:4)	6583.503208	1708.449974	11100.24423	24652.33028	21750.96552	2362.279428	17148.03535	15780.11173	8014.792967	2491.868551	8842.704783	6357.433578	6260.234763	4374.81492	13962.67722	16766.02695	5596.534333	7420.740786	7632.890368	11235.13276	20827.60474	6942.713582	12174.28376	6543.654346	5549.445941	7090.35852	14348.2323	12848.20046	12444.06209	7770.540884	22812.26633
PG(18:0/20:5)	0	0	0	514.6983115	0	394.9541085	0	0	0	0	0	383.77126	0	0	0	0	0	0	403.611144	534.0028326	0	0	390.1900271	0	0	511.925578	375.5898885	517.8524802	277.4004805	0	492.841513
PG(18:0/22:4)	0	0	0	376.2267333	1107.26116	0	0	0	0	0	0	0	0	392.4936091	528.7848835	0	0	0	0	642.7423	1177.8054	0	649.4893673	0	0	0	0	649.336088	694.0770371	525.7442171	913.3125671
PG(18:0/22:5)	0	0	0	801.0605932	0	0	0	0	0	653.9357122	0	0	0	417.3683327	411.2787287	1197.564423	398.6432693	0	0	557.7976818	401.7156337	799.9214357	398.3721689	0	0	0	1043.324732	670.7388212	529.9961939	0	0
PG(18:0/22:6)	0	0	0	0	684.803918	0	0	524.0125173	0	0	0	0	0	0	0	612.3322035	0	361.3713084	0	0	0	0	0	0	0	0	0	476.1556124	0	0	937.5092324
PG(18:1/16:1)	2646.013728	1248.398281	3822.706169	4428.62453	5086.093791	838.0238405	6100.684304	6194.709149	6086.821195	4062.759004	4567.113106	3341.052932	1870.539162	1412.153686	4247.190445	9259.2177	4444.67208	2665.046176	3654.636603	5334.368817	5134.074786	5533.831627	3362.481518	3418.639773	1941.881822	2201.214395	5332.881374	10283.2296	2788.662064	2027.663875	3293.343823
PG(18:1/18:1)	6248.16714	2222.07577	23377.10919	19476.48252	18045.43942	4574.471001	27049.8585	38535.97372	24427.98885	11971.18623	251863.351	195426.7746	6372.966292	11541.19663	28922.4789	25155.55823	15227.19405	78522.4455	11227.19873	22940.02175	17186.35234	21514.84406	14970.58791	12562.68988	19757.29575	5918.640511	23947.14938	23534.51742	19626.89703	12412.20577	13137.8324
PG(18:1/18:2)	26359.88733	13831.43512	106918.2852	80434.16652	29271.7505	7525.6731	69148.12039	80727.89205	123292.5846	130111.6713	112548.4812	45766.51606	97551.41128	71427.97796	131023.6002	141585.1146	246064.115	29341.8398	40182.31094	25524.66463	17474.79338	239837.2883	80089.81274	95949.77207	106705.2263	18679.29101	66861.47126	72888.56043	31171.36179	96579.39226	119978.5282
PG(18:1/18:3)	801.0471378	0	1659.799138	650.1964545	417.2505454	279.6677897	557.7867977	279.1379543	0	0	802.9830133	0	0	741.4131651	420.4729082	560.1098062	4899.557073	1203.5478	482.4857148	1697.060386	420.837059	654.3682738	962.3525408	1455.326997	0	0	1020.070922	4108.925365	1166.923046	0	0
PG(18:1/20:1)	0	534.3387061	0	597.4162838	0	0	0	400.0090132	1197.545621	0	0	389.6164391	532.8800969	798.1259673	0	0	0	0	0	0	0	0	408.1249129	0	800.9727599	0	378.8035966	413.2694291	261.3843293	0	0
PG(18:1/20:2)	0	276.1141362	973.4278275	1112.149525	406.8665908	279.5358707	554.7270648	1439.849791	1664.23576	540.8371379	1073.124922	530.2352057	0	794.8071277	1663.029704	548.5978227	1255.941768	1200.109821	392.6477908	916.1325091	1261.916812	839.5701063	1672.017648	0	558.597376	277.8579921	1442.357448	1650.583693	1505.20145	0	526.410822
PG(18:1/20:3)	0	0	1776.896706	1504.031729	880.559518	273.3264572	803.1810641	540.3302313	544.9923345	665.1558453	1058.103543	532.1747994	266.2519977	0	1423.283313	2372.149194	1368.71781	0	526.602827	1331.65404	640.3389257	1219.462262	547.772085	555.857793	411.7308559	410.2539564	3182.515677	602.3610821	1292.161897	717.0527384	1216.209831
PG(18:1/20:4)	4405.711467	1057.289541	7163.245898	9152.487946	4381.252318	1192.009612	9603.70899	3143.839836	4522.007373	1781.713136	4011.482238	2919.958044	1549.942541	1941.237342	6029.464138	8333.462694	3716.628573	2591.244446	2588.895327	3570.552784	5017.879026	4868.104058	6032.130398	5106.913323	1350.75407	1269.207666	1776.711764	5280.330541	1619.528833	1670.41207	3859.696043
PG(18:1/20:5)	793.2839074	0	663.9207397	964.8421664	421.8411857	0	413.218678	688.3379518	0	0	394.2806658	0	0	249.4163737	257.3537098	411.8607782	0	0	0	661.8347339	413.2908546	0	690.9860031	0	0	0	0	616.3309569	503.7199058	368.6047471	402.0677563
PG(18:1/22:4)	0	0	0	413.7679799	975.086657	0	0	262.6185342	0	0	0	373.5064435	250.9546883	244.6269195	1657.920688	698.0657945	0	667.3197426	670.7311362	0	895.6978215	1108.026893	834.838001	0	414.6163665	418.3017204	668.7047176	0	404.0623043	381.3654737	0
PG(18:1/22:5)	0	0	308.5163403	0	881.3945824	0	441.5804581	0	325.4418665	0	5449.973455	2070.430772	257.8269283	376.4447642	1012.232152	1209.207622	0	1744.916054	0	533.4410724	605.0509705	0	0	461.1557478	0	0	946.7650926	703.3650658	384.1625395	0	0
PG(18:1/22:6)	707.7148218	0	712.2975437	620.619321	1197.154343	489.8900715	1186.876065	356.2729859	2385.874414	0	2957.998279	1056.455198	253.5925361	505.9880823	823.2796535	366.1904026	0	1109.002016	808.3792302	0	479.6490794	0	1107.55372	358.0066333	0	0	537.4127182	1110.143527	0	493.6735851	802.7836955
PG(18:2/16:1)	6017.640444	2286.76903	15068.22012	6547.814647	14565.6631	1189.834788	8311.080184	11135.80748	7820.571544	3078.293341	8606.401797	3559.829022	2858.275056	4056.701633	5541.261849	6588.146698	8454.746599	6200.252656	18757.91121	6173.613974	7138.507554	6843.750737	10006.45728	7741.801573	7037.068649	3831.703647	11841.50298	6601.636459	5207.857584	2672.892517	12641.43584
PG(18:2/18:2)	3809.035843	1888.311096	11144.75466	23630.70623	9681.936561	960.5736752	4404.969799	12369.21754	8595.967927	7285.453707	34890.5854	34084.88009	3467.282679	7425.145243	13095.25256	26375.28643	8361.975032	19789.13119	9604.254325	9183.074368	20377.06509	7073.179605	17966.67836	8024.003662	4791.86104	6996.991903	21153.59982	7826.204867	13139.18037	6278.812344	11348.59455
PG(18:2/18:3)	1327.354815	0	0	1400.72488	0	0	2547.550778	1659.157263	0	1506.125165	1629.686101	426.6194546	1853.950271	1325.557353	2858.736733	2824.150413	2719.14953	2013.167144	0	1356.374196	2350.7064	1306.084066	3091.598855	4039.732569	426.1442332	656.8816032	1977.843311	3366.418353	947.236141	1341.187586	2089.454174
PG(18:2/20:1)	0	0	0	0	0	0	405.4323216	0	0	451.3317693	327.6931426	0	0	0	258.3007164	272.502197	0	564.9715389	0	0	0	0	541.8	812.8067093	541.6668988	0	0	0	537.9839887	0	0
PG(18:2/20:2)	1303.744453	876.1070307	962.3570861	977.6838226	553.3246243	0	2558.517538	2599.025999	2329.233327	5782.19617	2240.081559	1770.850807	0	1338.060621	1724.12625	11462.70529	5067.268741	1309.929234	2115.400271	1565.416407	2147.830018	2796.771026	2449.495891	1859.150655	2064.049599	975.9976337	5878.740832	0	1032.744151	1594.448774	1996.210653
PG(18:2/20:3)	0	0	0	0	0	0	352.5585183	0	517.2701992	0	0	473.9302604	450.5885003	0	769.7291625	0	495.0218189	0	767.6137033	0	0	357.2250398	388.8732884	0	0	0	0	2055.957914	687.7479496	0	619.5256326
PG(18:2/20:4)	1983.00715	369.5247997	751.735201	3144.678697	2387.246211	0	6797.742579	3609.496795	1831.823181	2513.492501	12141.97104	8509.030504	2021.126637	738.5739048	4277.225447	7255.083331	753.0594123	5509.1523	2946.600625	5615.091681	1913.36492	2422.731545	1790.965771	1847.896453	2045.549628	1183.820373	4206.831638	4768.778977	2608.661383	2288.285426	3209.372744
PG(18:2/20:5)	0	0	0	0	0	0	573.3259067	0	0	0	0	0	0	0	0	0	0	0	0	0	398.8137756	338.894897	576.4530412	0	0	0	389.304698	262.7847933	385.8159864	0	871.4646036
PG(18:2/22:4)	0	0	0	370.130205	0	0	0	0	0	0	0	367.1600422	252.2575065	537.3917788	0	868.412268	0	0	524.4288031	0	1234.640358	0	0	0	0	0	526.3623546	380.5018537	391.0366192	0	979.606028
PG(18:2/22:5)	0	0	0	0	727.0428906	0	0	0	0	0	0	352.6039363	269.070226	0	0	0	0	0	0	0	0	395.0227895	366.2497735	0	0	0	396.1884423	573.3370757	413.6418187	0	0
PG(18:2/22:6)	512.3647044	0	662.2943789	0	0	0	541.4924496	405.9380226	0	513.5090548	1788.22607	1066.057755	0	0	552.1802571	0	0	1491.880838	376.3855581	0	402.7807634	400.1954985	534.3721391	0	662.2098929	0	1299.778487	1547.141463	919.419245	394.9128935	385.8720309
PG(20:0/16:1)	0	0	0	1205.418417	0	0	744.2177631	0	0	0	0	0	397.7783096	0	0	0	386.847593	0	0	600.7515011	0	0	0	0	0	0	0	660.724317	0	0	711.4024414
PG(20:0/18:1)	0	0	538.6795387	0	0	720.2795564	661.0158661	1010.446761	1176.495568	1212.082097	1748.143061	0	0	633.611987	1121.101207	937.8348984	0	0	0	1571.025335	0	1178.95939	824.809191	900.2319304	1438.471382	0	875.463023	1262.862081	503.7651145	632.5951417	1163.539585
PG(20:0/18:2)	0	0	391.4627266	0	0	0	627.0616704	0	821.3427432	0	0	0	852.1871567	492.8742399	0	0	0	0	0	0	1847.3887	0	0	0	0	0	547.7829835	855.9570217	894.208521	458.0101965	1229.451174
PG(20:0/18:3)	0	0	0	0	0	0	0	0	0	341.0708068	0	0	287.869288	0	0	0	0	0	525.0007856	0	0	0	0	0	0	0	656.0682748	407.5928428	271.3559126	0	0
PG(20:0/20:1)	0	0	0	0	0	0	0	0	0	0	0	0	0	0	0	0	0	0	0	0	0	0	0	0	0	0	0	0	0	0	0
PG(20:0/20:2)	0	384.2852707	0	0	0	0	0	0	0	0	0	0	0	0	0	0	0	0	0	0	0	0	0	0	0	0	375.7809437	0	0	0	0
PG(20:0/20:3)	354.5355435	0	0	0	484.6169887	0	0	361.2995491	359.1508031	0	476.490289	0	0	0	0	0	0	0	0	716.2700338	393.3745206	0	0	0	0	0	482.9749382	252.34261	252.7413105	0	0
PG(20:0/20:4)	1401.419719	0	842.6121592	0	1289.643357	0	1074.048814	1351.733358	799.0677516	800.1526789	939.2490576	619.1713539	0	0	1157.872017	2147.916014	815.2607158	0	779.0820708	1604.505685	1086.853753	0	962.0006006	704.9620572	0	0	0	963.3767503	2208.874628	856.4485994	1166.850057
PG(20:0/20:5)	0	0	0	0	0	0	323.1959614	0	0	0	0	0	0	0	0	0	0	0	545.7704173	524.8961781	0	0	0	0	0	0	508.0487698	0	0	0	403.3749372
PG(20:0/22:4)	0	376.5161751	0	680.834629	0	0	409.702906	0	0	0	0	0	0	0	0	0	0	0	0	0	512.2250433	0	0	0	400.0462598	0	0	362.6959612	0	0	560.5783823
PG(20:0/22:5)	0	0	370.1737676	0	0	271.04434	0	393.911297	509.6829984	0	486.6348595	388.2173839	0	0	0	0	415.0201239	0	0	0	370.7810943	0	0	0	411.4510338	0	0	0	267.5677068	0	0
PG(20:0/22:6)	345.594862	0	0	0	0	0	0	0	0	0	345.4762354	0	0	0	0	0	0	338.3689071	0	0	0	0	0	0	0	0	0	392.2391585	0	0	437.6400268
PI(14:0/14:0)	538.8191612	0	0	0	0	0	0	0	0	0	0	822.5831017	0	0	0	0	0	0	0	0	755.4139776	0	0	0	0	0	880.03303	799.1928383	0	0	923.1468388
PI(14:0/18:1)	4325.495614	0	4860.260497	4730.208124	8478.568791	1153.615128	7989.075433	2813.546732	7369.93208	4072.228982	1712.448064	2395.375682	2927.57984	1932.915831	3699.491694	5228.063026	2703.246071	2890.424896	2187.525812	3390.023663	5425.414441	6360.030144	11484.17425	2505.671063	4294.516384	593.9233814	6008.636902	6430.055939	3709.276772	2091.231306	4836.584249
PI(14:0/18:2)	6782.313218	0	11182.26352	18292.33656	32493.94403	2622.260514	7131.509998	5917.746535	7965.340496	11546.07313	8577.225248	7881.52611	3412.484528	5582.357413	7710.671807	12025.72154	12784.97008	16538.45914	12543.21332	9196.381329	20889.0304	6623.311884	22099.40425	22238.53899	11288.8368	4174.854783	13194.99958	9935.884645	6641.252222	1451.944215	12985.57873
PI(14:0/18:3)	0	545.1370733	0	0	0	0	0	0	0	383.7621597	840.4820614	0	0	146.1374723	0	0	0	0	0	537.3964757	0	0	257.7265118	0	0	0	680.183117	460.0704863	0	251.3803511	1959.522756
PI(14:0/20:1)	346.4563162	0	0	0	0	0	0	0	0	0	531.5356794	434.2011718	0	0	0	601.0790799	0	0	0	0	0	0	0	0	0	0	0	0	0	0	0
PI(14:0/20:2)	0	0	0	0	0	542.4347258	0	0	585.7429761	563.3197526	0	582.230656	0	0	559.8616638	569.5209364	0	576.8740338	592.8649503	807.2661854	0	0	0	573.6971576	0	0	900.0642036	0	312.6901582	0	0
PI(14:0/20:3)	2470.866107	879.2425265	1897.624111	2110.238174	2296.956658	1371.13575	2521.491786	2058.416833	1908.257746	3529.955092	1414.304141	0	1880.781576	1450.457424	1555.266627	1308.079361	1829.326444	2161.983094	1997.410615	2611.478909	2131.465035	3512.12149	2910.758589	2789.563825	1984.132037	2422.770258	3461.938257	4127.357875	1465.544884	2545.676051	6173.83181
PI(14:0/20:4)	10001.45892	0	7312.136607	8291.087161	9009.541237	1886.194517	7339.615475	7783.001256	6237.122651	3209.703965	3639.552451	11489.07271	3182.742257	5169.898525	10235.88531	5156.853464	10747.87408	5880.592704	6625.921504	9368.819647	18166.57011	4990.365911	7949.629945	8620.499862	5069.926917	2269.940264	9874.360691	8669.098262	3483.007654	4601.750752	14929.16531
PI(14:0/20:5)	0	0	1713.895231	1374.70251	1093.20196	0	0	0	2274.366785	0	853.0136617	1421.256608	0	0	569.4206196	1424.209585	831.5110195	855.1763393	1007.695275	566.0348475	1955.686317	847.132668	2198.197523	0	538.5003476	0	1029.607228	1445.309287	584.8665348	0	414.340735
PI(14:0/22:4)	0	0	842.0397339	0	1641.884605	0	562.9451994	1633.411558	1165.730781	2086.786416	0	1800.530786	0	0	0	1293.570477	535.6345744	2269.324548	0	0	1650.375644	1123.870208	1092.376396	822.6468569	2186.969103	0	598.3333673	0	0	2036.028564	4355.842835
PI(14:0/22:5)	0	0	652.335793	0	1363.93338	0	563.2742676	664.8245454	1711.555754	2231.497391	0	0	576.0968594	553.7055532	0	1138.406282	0	0	535.6669577	2115.412166	1560.519952	0	817.8319716	784.4708107	590.4762751	0	1661.70916	1617.623424	0	0	1496.575434
PI(14:0/22:6)	822.7102312	0	0	0	0	0	0	0	0	0	0	555.2440852	0	0	0	138.074759	1312.844199	0	0	604.9413443	0	0	0	810.3023249	0	0	269.6605539	704.1872158	0	0	263.9740305
PI(16:0/14:0)	0	0	0	0	0	0	0	0	0	0	0	857.9540378	0	0	834.6243409	0	0	0	0	605.9394419	0	0	0	0	0	0	0	0	0	0	903.6304367
PI(16:0/16:0)	565.653646	0	991.2931447	0	499.4710978	1054.029864	0	0	0	1045.397642	1565.177748	904.2996617	0	0	1534.970179	852.6991763	0	1512.655442	0	848.399197	2594.549432	969.9350904	0	1037.336157	0	0	0	2171.572837	1990.364907	0	0
PI(16:0/16:1)	1030.132308	0	2384.444416	1372.277867	1426.347747	0	2102.457108	1242.113322	0	0	0	0	0	0	2538.445948	0	1185.402024	0	0	1582.347082	2224.992936	1032.906382	2539.535548	1467.94534	0	0	0	2132.853478	2616.616553	0	1046.267877
PI(16:0/18:0)	0	0	3111.751049	2081.174843	0	0	2241.816305	941.8970601	2229.474394	3258.380123	1537.522131	1917.98893	0	1258.959025	1787.635088	7092.285188	4045.482392	3296.079296	3062.119847	1476.186743	4564.54548	951.161893	3633.720276	3403.017859	1602.744311	0	2465.079734	1406.021216	4911.595894	3165.167636	4279.264581
PI(16:0/18:1)	2758.183976	2632.763671	8041.792591	8787.227809	4896.955051	3492.764711	5313.660154	9996.582873	1466.621176	799.4058472	1000.860646	1505.010343	1052.086301	4296.906653	5037.238295	2066.675143	1227.898759	2007.095863	1050.622774	1407.78861	1547.463992	3822.662026	10749.6795	12718.65093	3364.066221	6539.742929	0	1546.611737	5280.084548	994.9068109	1085.337026
PI(16:0/18:2)	6782.673329	1420.750886	4046.694685	4549.708619	10548.79037	1957.839688	15687.49495	8076.453477	5746.445098	2857.449433	2075.217868	1553.905621	0	6483.142196	2560.709158	2541.67148	5542.52083	3098.414131	0	2238.224672	7773.134014	4040.834736	29905.39059	10337.85444	8051.349292	7013.464705	2084.590767	2454.310696	4939.089727	3516.009296	0
PI(16:0/18:3)	303962.8972	32563.90333	416364.3072	631259.0005	716250.5293	46509.86778	476394.1634	179987.5605	377272.1509	211423.8904	336063.9032	263851.4423	252657.7389	166893.0499	163643.5098	313215.0637	252030.9977	480602.5231	119000.8591	367091.3544	632872.2169	316472.7406	817934.4994	1033937.444	154696.7241	60488.90394	233549.4348	563825.3051	177714.2462	102411.5648	735093.4702
PI(16:0/20:1)	0	0	0	0	0	0	0	0	0	0	0	0	0	0	0	0	0	0	1051.302579	1082.976562	1052.829189	0	0	2092.826167	0	0	0	0	0	0	0
PI(16:0/20:2)	0	0	1043.339016	0	0	0	0	0	1052.749926	0	0	0	0	0	1037.455323	1047.554426	0	0	1073.245588	0	0	1027.355648	0	2950.993901	0	0	0	0	0	0	0
PI(16:0/20:3)	0	0	0	0	0	383.0552308	319.9216379	404.3463963	415.5168205	389.6235923	0	250.4357488	0	0	0	0	1039.178611	0	0	0	1141.560288	0	3015.697515	0	278.5418349	0	0	3586.183093	1535.351653	0	1487.815732
PI(16:0/20:4)	12798.2405	3992.34683	4814.783792	3557.848595	7038.537973	4104.782218	25969.01363	8049.343789	3826.840486	6086.171003	2293.512186	2215.314042	996.457232	1580.264018	7802.495195	5762.993455	2549.227511	1032.024101	0	1713.879766	8149.630437	10581.82891	20637.55286	17625.12296	6957.891492	2875.15617	1047.697835	4195.179095	4642.107082	1868.840982	0
PI(16:0/20:5)	0	0	0	0	0	938.0981992	1575.292237	0	0	0	0	0	0	0	0	0	1542.063887	0	868.9132256	0	0	0	0	0	0	1573.302123	0	0	0	0	1081.487982
PI(16:0/22:4)	798.624859	0	0	2605.556152	783.5395555	0	1011.039235	0	0	998.0507533	0	0	0	0	0	0	0	0	0	953.0101465	0	0	0	0	0	0	0	0	0	0	0
PI(16:0/22:5)	1740.177466	1038.438674	1044.585715	0	0	2102.763373	2050.555181	2069.65604	0	1037.487228	0	1450.320189	0	0	0	0	0	0	1075.600164	0	0	2034.149858	1952.018022	2994.161115	2072.414335	0	928.9182998	1441.058651	2625.331857	0	0
PI(16:0/22:6)	1344.589565	0	0	0	0	0	2597.706751	0	2085.076882	0	0	0	0	0	0	0	1052.43451	0	0	0	2630.86932	0	2535.866933	0	0	0	0	0	1676.820738	0	0
PI(18:0/14:0)	0	0	0	231.4660494	319.8743042	0	236.554424	0	0	0	0	0	0	0	0	0	382.5508872	0	441.6283541	262.1203074	0	0	529.1560097	370.8522536	348.6459849	0	0	321.4791589	170.2954414	0	0
PI(18:0/16:1)	0	0	2083.64953	1444.688289	1696.318919	1054.53764	4702.004923	2704.599511	0	1049.604717	0	0	0	0	3645.445261	0	0	0	0	2165.320875	0	999.3899889	1795.89943	1577.773964	0	0	0	1996.982485	2061.857032	0	0
PI(18:0/18:0)	1680.631527	1041.564019	2987.211995	6950.224143	12620.17756	0	6936.488672	7611.116434	2479.881207	7734.898296	2316.989085	3437.28713	0	2091.060403	4710.341924	1666.751244	0	2557.92434	2931.184333	1440.832925	13193.11461	2809.40679	3610.173841	1318.423885	5711.477639	0	4037.676419	0	1482.460525	1013.548474	3768.361514
PI(18:0/18:1)	4743.200437	4719.938482	4123.996931	3631.196858	7158.594483	1516.77115	6003.370562	4237.801825	3514.501638	5136.449554	0	1549.537796	0	883.4135651	4991.588622	5116.514322	4581.979943	0	2542.053334	0	7908.987793	3641.972535	13675.37637	4071.65421	9743.011859	1925.104223	1565.883476	3316.232145	7653.873149	0	0
PI(18:0/18:2)	8966.030398	1075.861485	11411.47591	9846.03185	29072.40045	5661.209743	19138.1546	30375.75658	10110.84868	27033.1731	4196.838	945.9587445	1882.665097	646.4748674	12950.30114	6235.800723	9297.869601	1684.601849	5841.536004	6486.740667	8284.801058	23967.69557	11037.22363	35826.80193	1973.592566	8274.517975	1060.716244	2267.205247	3219.212588	1403.440129	2687.691237
PI(18:0/18:3)	0	0	942.850751	0	0	0	1438.720088	1053.52292	0	0	0	0	0	0	1017.351974	0	0	0	0	0	0	0	2103.880627	0	0	1053.772494	1078.85635	1290.798704	0	0	0
PI(18:0/20:0)	496240.3948	36664.78675	413023.4815	553909.2789	521463.4502	28537.5489	774259.1871	443753.6113	570560.9383	419307.8821	462738.6006	352164.2289	234772.1115	166728.3201	435435.5863	313326.4177	443227.1759	119950.5632	193926.1459	464758.2291	288865.8746	477121.3861	600441.3665	419594.4346	301489.1045	10839.59582	378677.9277	581146.6715	295141.6249	113673.8179	442699.0047
PI(18:0/20:1)	0	0	0	0	0	0	0	0	0	0	0	0	0	0	0	0	0	0	0	0	0	0	0	0	0	0	0	0	0	0	0
PI(18:0/20:2)	0	0	1854.94332	0	0	0	0	2078.266917	2605.327962	0	0	0	0	0	1572.700782	670.8342026	0	0	0	0	0	2010.25877	1798.921257	0	0	0	0	0	818.8901618	0	0
PI(18:0/20:3)	6407.634905	4276.187832	6971.488027	7148.206716	7514.856255	2469.472919	13631.07103	6063.593039	7443.666604	2942.230226	0	4172.925925	0	1251.326953	2138.784311	0	2224.118549	0	1739.751529	2157.544798	7490.123472	17335.38895	34412.16269	11802.47496	3139.350888	2293.678186	1568.725011	1062.499787	5707.286449	0	1536.428082
PI(18:0/20:4)	19776.96569	32797.81028	29258.63917	59413.07774	24949.00644	17334.58132	61050.54677	124777.2158	33167.8007	27154.1039	2561.037542	14009.00397	2996.480656	3762.407189	81530.18467	34867.93761	7694.772894	5090.402803	10903.0844	8227.230104	54397.79469	134022.7529	89326.82156	76046.2446	118231.1822	11163.97803	0	7419.970648	17146.80408	5291.528342	6170.337424
PI(18:0/20:5)	0	0	0	1395.152127	600.6962515	0	0	245.890219	0	975.9646106	0	575.0523319	0	0	0	0	0	0	467.6324717	433.1285281	0	0	312.5353949	354.6149111	0	0	270.8016736	0	0	0	419.263551
PI(18:0/22:4)	0	1043.488445	2057.462691	1851.292094	1563.600219	0	2377.981755	0	1042.143335	1042.335289	0	0	0	0	0	2104.752429	0	948.3621143	772.1832046	0	2588.837077	1316.121844	2094.071291	3110.658611	1904.040327	1010.172916	0	1056.850557	0	0	0
PI(18:0/22:5)	0	0	0	0	1512.117716	0	3195.028649	0	0	1573.894258	0	0	0	0	0	1505.356824	0	0	0	2281.546725	2657.451151	1009.856949	778.5338104	1280.944492	2830.064305	0	0	1527.601462	2498.036851	0	0
PI(18:0/22:6)	0	0	1322.906014	1026.897891	1313.128024	0	4360.335766	3328.351031	2043.68618	0	0	0	0	0	2082.754087	0	947.6364572	0	727.6132261	1618.785868	0	0	3197.920511	7903.706178	3981.214075	1027.791965	0	1581.450294	1039.189871	0	0
PI(18:1/16:1)	0	996.748681	2434.699285	1842.566521	2663.005381	1449.197869	3895.114958	1272.046659	942.8495241	906.6729685	0	1961.208796	0	1566.846045	1041.492396	1407.700652	1011.760491	2916.401121	0	1453.517985	1021.182061	0	1040.620098	3149.618458	742.2959989	0	0	4121.187386	1251.75797	0	1446.168956
PI(18:1/18:1)	3072.857327	1394.349881	5161.879633	7188.084747	2712.256556	0	5753.66996	3204.194769	2614.274989	1635.826685	0	0	0	988.1836509	3650.811004	2628.59667	0	2247.179795	1926.147107	2302.697185	6120.285542	5576.579408	3860.731301	4087.681769	4932.964691	2101.590902	0	1844.157865	1632.372932	1593.528045	1451.017609
PI(18:1/18:2)	2041.594265	3762.255626	3585.247768	7072.848651	8753.377205	0	4433.617332	2705.3868	2354.681537	2821.952422	0	3233.195102	2386.097786	3204.165928	0	7197.951351	2754.205022	0	3376.892798	1941.259485	4560.222456	6732.907128	3690.985162	5813.338486	2754.964418	5178.528732	1554.021484	1977.378576	946.85317	0	0
PI(18:1/18:3)	372.1417552	0	269.7736809	0	0	0	0	0	246.7632635	0	0	0	0	0	0	0	0	764.8368837	1615.919151	0	0	0	0	0	0	0	0	0	201.573015	0	0
PI(18:1/20:1)	0	0	0	0	0	0	222.3458858	0	0	0	0	0	189.7161039	0	0	0	0	0	0	0	352.4949859	427.3012884	0	387.9362999	0	0	0	211.2168389	0	0	0
PI(18:1/20:2)	0	0	0	0	237.9013871	0	605.5598344	0	356.4756977	0	0	0	0	0	0	0	753.2276295	328.7262482	0	0	486.6712752	793.6368974	231.7971843	0	0	0	0	421.0357696	172.8705771	0	0
PI(18:1/20:3)	7443.902149	1710.380952	3480.645674	2452.066232	6146.040251	734.0946505	3859.521828	3296.073439	5216.113372	8451.345525	5173.872899	6297.720901	2492.899414	1355.590399	566.1852229	1256.972126	1834.588294	3807.1317	1414.990796	4227.221992	7261.052354	7828.308997	6781.586156	4421.999426	2802.248475	1705.223477	1479.469234	3359.770465	5546.066736	2298.106245	2071.114499
PI(18:1/20:4)	7765.246338	2041.980721	4968.088913	5805.581818	8435.650556	1645.786999	6416.275008	11277.30112	7996.181079	3400.417734	3857.598484	1321.988002	2853.797537	2866.156499	6271.726458	6634.201453	6066.471304	6421.407807	5514.270299	5339.253949	7244.646239	4592.293503	7516.573688	14572.59677	4828.971832	1226.272782	3303.248811	1211.722497	4426.757168	2205.459787	0
PI(18:1/20:5)	0	0	642.8763101	321.1684754	293.8353038	0	287.1030406	0	318.9947569	0	0	245.0861768	177.8388581	497.8319757	0	290.2035933	0	250.9009468	0	383.5375029	321.3170563	0	399.9555615	278.5358051	190.9340888	252.8738551	303.0768648	157.7814217	231.2297292	0	630.9705172
PI(18:1/22:4)	0	0	0	0	994.3163382	0	0	0	0	0	1023.375596	1023.893771	0	0	0	2051.204823	3097.177886	929.7547697	0	453.1537235	2584.986547	1479.051126	1491.261757	0	0	0	1628.710894	995.9102014	0	2055.040328	842.3123312
PI(18:1/22:5)	2661.029124	0	2342.703734	909.1937494	1604.546266	0	2138.049958	1003.482194	1587.777993	2559.275104	833.942895	2382.821798	388.1591064	605.6831799	1389.607669	1400.180433	817.5456165	321.5814128	0	1073.682879	2438.305625	1850.286057	1192.457796	856.6220638	2444.373765	0	0	3907.193798	1614.422834	484.3493298	0
PI(18:1/22:6)	0	0	2240.316956	1247.791258	3060.982667	0	2086.026549	0	3375.639272	2124.935703	0	894.032614	556.2540699	1709.003697	3521.400402	873.1478624	4072.390097	1207.194847	2944.582414	1482.045685	4656.421581	1946.757449	3996.393273	2158.696584	1587.45266	0	576.2744865	1950.091136	0	0	1731.695919
PI(18:2/16:1)	155787.8925	19463.40221	182991.2394	277919.872	351211.1823	27176.2229	235890.2553	178653.0925	236934.2252	219153.6865	170248.6596	154024.3481	132288.7553	139013.5638	171228.4542	213957.9847	264490.044	206423.0562	170621.429	156483.1047	303943.8089	302578.7635	293900.244	325148.5408	197138.9139	29824.29581	294263.0476	201385.0206	166972.4839	89619.70331	217946.0885
PI(18:2/18:2)	2335.655029	2503.623413	6078.596651	3720.77327	20972.20474	0	4431.159965	2385.560514	5579.781871	6211.428233	505.4437378	6414.052724	2106.737858	4188.871996	5081.274946	18379.00795	0	3261.197931	6417.861632	0	7525.17596	8405.825191	13085.40097	11054.76005	7087.130227	2510.913082	4280.687646	8408.662899	4966.465284	0	7020.50115
PI(18:2/18:3)	0	0	0	0	195.829495	0	336.2342227	0	0	243.8442398	0	207.6351057	0	0	0	0	0	176.1445984	181.9074672	208.3819282	285.0217055	0	496.2884976	195.8188281	0	0	0	319.7584394	0	0	275.9066208
PI(18:2/20:1)	0	0	0	196.6756907	188.2621833	0	0	460.4173167	0	0	0	0	165.9510665	218.9063567	0	332.0891714	206.3101711	486.9592474	212.072757	297.7008272	0	0	0	304.4341681	0	0	205.6573531	325.6359867	0	0	491.6160305
PI(18:2/20:2)	187.4953102	0	453.9157367	0	442.8218842	0	0	248.6600952	326.0168692	173.3160139	0	337.2101684	0	0	0	0	0	0	0	0	0	0	0	245.8480196	0	332.834576	418.3075387	157.016994	0	0	0
PI(18:2/20:3)	0	1127.086511	972.3746586	590.5925208	1226.314208	697.413069	1347.698661	1339.535849	1890.717464	1918.565233	2260.977501	1869.209351	488.8014462	1527.854469	1196.823814	1311.201508	1193.598194	1985.584767	0	982.8582198	829.2838355	999.1995615	1594.716806	2776.542366	804.2197535	544.1649555	3548.880855	1074.005255	722.7874446	622.6870027	6186.24314
PI(18:2/20:4)	9709.123252	1493.852751	31343.95613	19741.23871	17794.24609	3730.002833	10311.15668	16499.03188	15434.6963	10072.19323	5637.103004	7769.497703	6023.736576	7767.554448	19433.51702	24244.28972	19011.37129	10405.16804	12906.98262	14959.02474	67573.4405	17223.35975	27855.63541	17310.16961	12890.25729	0	19623.47194	13796.39552	5956.489241	7108.135434	23296.00829
PI(18:2/20:5)	0	0	0	0	0	0	444.3321962	387.7033521	0	0	0	0	0	494.6109699	0	0	0	0	0	1185.941703	0	0	0	267.4493591	730.3055484	347.7644199	590.344086	0	0	0	0
PI(18:2/22:4)	0	0	0	0	0	0	0	0	0	0	1448.266092	0	0	0	0	0	881.1410118	866.3545095	599.6934153	1499.280218	0	580.9017911	0	0	0	0	815.31103	2243.296985	553.0986448	0	2349.838807
PI(18:2/22:5)	1254.55507	184.8252666	1359.250706	374.2271318	1172.517141	904.2517069	894.5116495	0	1788.410623	1018.89805	557.1894197	718.4222113	490.2832181	293.1717032	393.7289667	879.1521383	1120.417596	0	1343.236117	3246.763671	0	538.6664937	188.3322492	1210.053099	425.2226303	959.1218057	2369.631035	0	0	741.4809527	4326.833313
PI(18:2/22:6)	1530.047796	0	3363.122733	1820.75759	1866.12268	0	3023.3982	551.6517776	1931.95851	0	0	1128.68031	1670.92698	0	1954.551149	0	1131.347906	2352.297922	0	0	3537.76987	1370.898282	2193.459763	2716.91956	603.8153665	0	1399.47367	1314.126516	1347.857924	0	1437.867269
PI(20:0/16:1)	1268.983971	544.9649073	5493.074857	4729.259786	7385.068687	1099.523433	9046.60346	4179.630099	3718.830849	3389.450529	4885.120494	4235.953561	2193.392822	2056.450548	8336.880089	2502.221252	3214.060863	875.9315681	2712.954679	3787.60804	3472.0063	5439.720405	10124.46275	1630.474904	1072.803828	822.6291131	3849.252541	7380.41079	3729.556267	3664.564757	4139.125151
PI(20:0/18:1)	23392.96843	4864.125836	65542.13337	61297.2431	67139.71883	3699.806436	88742.24409	48487.64728	38849.89839	78265.10496	36758.03863	33332.96153	21781.737	20272.61388	73222.96358	50163.14508	60570.34642	21282.66596	26192.58913	57438.76491	29007.48439	63522.75335	88610.58809	41439.27666	30924.6955	1355.668447	43542.17851	42499.03032	21285.37612	17812.21434	42949.95146
PI(20:0/18:2)	9760.032983	1453.93829	15201.62064	14098.49169	35663.51474	0	15037.18296	8065.302719	9061.912916	8869.297735	6065.070399	7837.273872	6422.142667	6661.073286	6876.880378	13581.07835	19905.09205	8815.731243	8960.293236	13870.34852	9971.659275	15005.37755	23735.3879	14981.35778	4857.025438	1342.194641	15451.51742	16979.51978	6983.444222	1387.369403	13661.1637
PI(20:0/18:3)	0	0	543.8029091	0	0	0	0	0	549.2300439	0	0	0	0	0	0	0	802.6606899	0	0	909.2093034	0	0	0	0	590.6429941	0	0	0	863.0293975	0	0
PI(20:0/20:1)	0	0	5106.816049	3476.767094	2958.280306	0	3032.475447	1154.678863	3294.606299	5938.926333	3061.911205	1227.826324	0	2699.182751	7525.602071	2066.032764	2086.357599	0	1478.382761	2348.597847	1254.474341	4309.44096	7423.399882	2279.175007	6202.645334	0	2320.630769	2537.855066	2843.935781	0	2024.963362
PI(20:0/20:2)	1058.204148	0	550.2192316	1802.745373	4201.190189	0	1371.908871	553.4048426	1110.003585	1058.599445	0	598.0097473	0	859.9044865	1727.031052	1156.744537	2094.6483	1471.343874	1185.777951	0	1125.534748	1824.517003	2759.92524	733.0854624	1851.557697	0	1158.291656	4778.832922	0	0	410.1660579
PI(20:0/20:3)	2160.197654	0	1416.190061	929.4690523	1317.254354	635.4965355	2557.235317	847.2816382	2031.740156	746.9518651	746.8019384	2301.929637	858.7589694	449.6972805	2049.2688	879.4448791	1762.465334	0	2553.08171	6220.568161	3542.554534	2257.325298	1925.616406	1337.228147	0	1310.923546	1147.670944	4105.415437	0	0	2247.769489
PI(20:0/20:4)	6006.532535	0	6202.604716	9937.803937	9880.040994	0	15357.30697	4004.379681	2206.813253	4334.819626	3633.408875	3742.188691	1299.411141	2088.007485	5194.286263	3735.385494	6073.307833	5799.325314	6383.376418	4660.73415	6424.898183	6356.386979	3551.922718	3379.864413	0	0	4161.563881	9375.144639	4270.376945	658.9471203	5753.544246
PI(20:0/20:5)	0	555.3018658	547.9781046	0	0	0	0	577.3555755	0	629.7180219	0	0	0	0	0	0	0	0	0	0	559.8457369	0	1328.24525	0	0	0	887.2815922	1441.023725	0	0	0
PI(20:0/22:5)	0	0	0	784.0237634	534.3526395	0	0	1079.124729	739.0234165	1631.853067	0	0	0	0	677.9472661	911.475474	989.7173722	0	0	0	0	0	0	1133.844574	0	0	0	0	0	950.4995396	1355.847343
PI(20:0/22:6)	0	0	0	545.5584943	911.1951912	0	0	0	0	0	585.3919757	0	0	0	0	0	0	0	0	0	0	535.5075527	0	1110.681902	0	0	0	0	0	0	980.9418248
PS(14:0/14:0)	0	0	589.1150225	0	0	0	0	0	0	0	854.3858381	0	0	0	0	0	0	0	1178.730813	601.6745849	0	0	0	0	0	0	0	0	0	0	0
PS(14:0/18:1)	809.5501495	0	1061.449318	461.1242351	524.2509777	160.706778	247.3470663	635.0800477	0	556.9716968	814.4923762	756.9758001	0	301.504733	447.1370246	244.8714889	667.7848864	0	906.7422883	0	654.46789	0	793.8408249	0	538.9414138	0	2725.569712	788.6090351	143.4815141	0	5448.787464
PS(14:0/18:2)	2890.666226	0	1727.284909	6388.012422	12213.66536	0	2048.422619	886.9406413	2949.386035	3803.289015	2912.531716	6569.112208	1178.218477	2651.078653	0	4098.922865	2623.124061	5546.385181	1784.927582	1509.073629	5033.634526	3536.533414	7964.647738	6077.140554	1631.680814	0	6056.035525	1323.241079	589.8927235	585.0321372	4829.724904
PS(14:0/18:3)	0	549.9885007	0	0	0	0	0	0	0	0	0	0	0	0	0	0	0	564.7415291	0	0	0	0	0	533.7382699	0	0	1014.637938	0	364.7773706	789.8715727	519.3994662
PS(14:0/20:1)	0	0	0	0	0	0	0	0	0	0	0	0	0	0	0	0	0	0	0	0	0	0	0	1452.998865	0	0	0	0	0	0	0
PS(14:0/20:2)	0	0	0	0	0	0	0	0	0	586.4917542	0	0	0	0	0	0	0	0	0	1041.364411	593.119857	0	0	0	0	0	0	0	0	0	0
PS(14:0/20:3)	2060.139181	1012.187697	912.3097847	2874.166494	2043.799199	0	1015.518241	0	0	0	0	1020.201254	0	0	0	1212.59895	0	2047.710264	0	1596.74207	0	1008.323909	0	0	2023.091024	0	1044.44434	0	0	0	1046.776105
PS(14:0/20:4)	2420.786346	3632.29689	5603.72966	9592.424027	5057.730212	3034.681425	8851.654454	9903.533607	2389.670364	7737.034577	4599.766013	9756.809057	2835.246808	6041.700032	2786.253503	6040.828731	3574.913035	2392.766157	7601.897579	7322.973078	11083.03993	5981.284875	5570.119144	3478.513977	4132.770869	3861.786217	10291.56826	9024.854705	8139.437602	4412.331101	6489.148583
PS(14:0/20:5)	0	0	1042.869912	0	2060.792396	0	0	1012.949096	0	1039.700658	1026.976318	1561.311105	0	0	2023.595969	1529.043982	0	835.8136408	0	0	0	0	2037.819041	0	0	0	0	1555.284299	1004.688523	0	0
PS(14:0/22:4)	0	0	1519.278725	2565.327623	2055.023644	0	1022.626826	4063.765124	0	2594.713906	0	1511.327088	0	2029.336044	3051.240929	1001.485339	0	0	1046.209722	1569.674369	3465.317826	3547.632679	2061.628464	0	0	1002.427083	1373.126949	0	909.0146497	0	3093.057313
PS(14:0/22:5)	0	0	0	0	325.0238083	0	0	0	0	479.7582273	690.60501	339.0506228	0	0	0	214.965366	0	0	1303.665736	3269.600995	0	0	0	0	0	0	1087.455868	0	0	216.5184703	2165.861363
PS(14:0/22:6)	0	1929.584697	0	0	1298.314861	0	0	2581.088908	2209.167339	0	1467.102178	0	0	0	0	0	0	0	0	0	0	0	1474.687306	0	2327.808993	0	0	0	0	0	0
PS(16:0/14:0)	0	0	0	0	0	0	0	0	1053.034085	0	0	0	0	0	0	0	0	0	0	0	0	0	0	0	0	0	0	0	0	0	1088.303953
PS(16:0/16:0)	561.311282	0	1559.371941	0	1287.399302	0	519.5306426	419.7561032	0	1152.911648	567.8128837	0	0	0	1160.231751	0	512.338008	0	900.6891106	0	522.6829327	1726.713898	1530.2758	0	0	527.1403925	1177.196915	3176.849669	855.8425548	688.589884	3309.829431
PS(16:0/16:1)	0	0	0	0	0	0	0	0	0	0	0	0	0	590.2840671	0	568.8685696	0	0	0	1770.588378	0	0	868.155046	0	0	0	0	874.2748555	0	587.5587776	0
PS(16:0/18:0)	21204.50126	4059.87573	8524.687626	12030.67963	17205.98082	5748.664206	34786.79816	12892.00812	29986.85387	14262.49413	4112.873324	4066.235556	4767.71282	2862.521841	4249.958554	14019.04674	11040.67325	29907.06624	11045.43444	10415.50821	10691.15698	19797.94658	38655.85302	13424.72459	6090.812722	1042.823366	10468.11301	13909.90066	14338.4284	4199.485697	40577.34439
PS(16:0/18:1)	1612.879958	1050.04596	1051.15262	5389.853499	12887.85818	0	4057.896079	1545.436864	0	2451.792971	1542.051154	3538.665588	0	2458.884517	6344.18584	1793.067179	4061.998861	5587.40111	4190.949177	1864.892311	3998.894587	2392.309749	4035.82481	2617.551338	2634.676334	0	7361.903351	1466.030067	2828.237153	1847.724901	4553.318764
PS(16:0/18:2)	1569.865458	0	2195.914642	2242.843686	2009.105101	0	0	1493.337746	1532.733812	1873.392315	2026.873606	0	1771.902966	2490.152061	0	3301.45855	2328.951199	4028.450776	3203.488026	0	4025.344305	3095.844661	5438.641931	2034.859737	2013.937773	1514.502123	0	2396.069201	5410.906811	996.806527	6402.527712
PS(16:0/18:3)	0	0	0	987.3626172	0	0	0	0	1843.563669	0	0	0	0	0	576.3961735	0	0	0	0	1222.957821	0	0	0	860.9865352	0	0	1227.621567	0	0	0	1025.895976
PS(16:0/20:1)	1926.001263	0	0	0	0	0	0	0	0	0	0	1409.795767	0	1004.88017	0	1334.305837	0	1021.729894	1560.437661	0	817.5503576	1113.559898	0	0	0	0	4182.336746	1517.937371	1502.968006	0	0
PS(16:0/20:2)	981.5273226	0	0	0	0	0	0	0	0	0	0	0	0	1264.145692	0	1052.705716	0	0	0	0	0	0	0	0	0	0	1585.583838	0	0	0	0
PS(16:0/20:3)	0	0	0	1974.292052	2321.069396	0	2853.12136	1043.816503	0	1047.136554	929.2690708	0	0	0	0	2525.271273	0	1552.099288	0	0	0	993.6325239	0	0	1041.966036	0	0	0	1033.826473	0	0
PS(16:0/20:4)	2595.1896	1126.409611	6963.561204	19332.29602	14824.81084	0	12585.94636	8006.366103	7819.664851	3086.138469	2766.03641	5740.038046	3601.894223	3096.604753	8227.996576	14136.72465	1750.984125	11335.66901	9197.916339	6703.502669	19329.17818	9567.638206	10836.89315	6223.34942	2083.337046	5203.666915	7620.124244	9078.830975	11605.9521	0	16889.4392
PS(16:0/20:5)	0	0	1550.413635	1498.399211	1380.870721	1455.737069	1550.490541	0	0	0	0	2575.817921	1026.73471	1527.027335	0	1528.856241	0	0	1590.576745	0	4155.63613	1019.950409	942.2487793	0	0	1044.829943	0	0	0	0	1848.525507
PS(16:0/22:4)	1030.132308	0	0	0	0	0	976.9796255	0	0	1029.2501	1547.267479	1035.088583	0	0	0	1079.566802	1224.946171	1555.87627	0	0	1067.199442	2347.118649	1020.232032	0	0	0	3617.004988	2154.774146	0	0	768.0615025
PS(16:0/22:5)	0	0	1522.872877	1710.884718	1910.088772	0	3168.745669	734.7881234	1785.690866	0	979.3769182	1562.121662	1815.777443	0	0	1785.338345	1619.952479	395.3106214	0	0	2145.581194	1533.259155	1516.890129	2089.106787	1541.998793	1502.825457	1580.853389	0	4071.494874	0	2615.259075
PS(16:0/22:6)	0	0	0	0	0	0	0	0	1233.855223	0	1028.876404	1015.390005	1030.407199	0	0	0	0	2560.591377	1531.442945	1226.771898	0	0	0	1276.179629	1106.361869	0	0	2089.824165	1578.413153	1799.123466	2775.770622
PS(18:0/14:0)	1547.566851	0	1016.104739	0	1501.973946	0	9074.338146	1008.684422	2031.385717	2062.419474	1536.440136	0	996.9206271	1494.707102	1511.273766	1505.18484	0	1535.194104	0	3737.471518	0	0	1521.893024	0	2529.931116	0	0	3495.819288	0	0	1569.950717
PS(18:0/16:1)	1950.543628	1027.092541	7322.603542	2557.123151	3863.497067	1039.964062	15056.33991	4887.362908	9944.610637	5573.410115	6159.430347	1025.666121	1997.244512	3262.443725	2224.49589	3181.162723	1558.286865	481.0584217	2062.39737	2469.821121	3050.6976	5140.941328	6891.123163	2610.549383	1036.069819	0	1962.129663	9024.198415	1709.240936	4472.483259	2613.593288
PS(18:0/18:0)	353211.4891	128291.7646	861340.3139	485497.8507	412721.4731	56999.78601	1408939.276	833736.1273	1125843	467508.5733	865117.0652	358362.2561	337987.7991	254545.7111	607332.8289	607860.8539	258953.9129	176753.7211	257595.987	381500.4932	226086.7199	697091.2793	460458.1782	162587.2561	1093285.899	28291.67976	599141.8031	900565.5113	590810.6548	297934.1267	564646.9071
PS(18:0/18:1)	32008.78098	7299.786041	161118.5728	57405.94521	61836.28028	10411.29222	214837.0427	72131.25565	69537.39766	68300.07949	84380.14547	29251.56297	30863.83899	38860.09055	115355.8945	86097.83639	39130.57279	19305.54818	31154.49655	60312.3918	26587.70114	133676.0148	83014.48462	17157.41982	81288.87296	10425.22571	71474.85686	92182.15226	46623.10711	56694.07533	64439.14436
PS(18:0/18:2)	14124.41751	4147.573801	10960.69875	11899.29375	24322.76804	4161.514469	22269.15673	7764.998396	14991.0087	14382.74888	10543.2254	6800.638785	9110.813277	9720.400339	12239.83783	12686.24706	14242.29936	7341.814147	15031.76369	12472.74247	10480.34304	15298.37926	30612.46726	12595.60486	8164.096525	3065.746222	18254.78375	15848.80877	6225.699173	2687.33143	11965.8405
PS(18:0/18:3)	2726.050294	1762.20236	761.0245098	1004.423273	1243.684555	1772.370688	1432.725583	1315.047575	1466.262115	3883.766953	1625.917714	1507.881108	1970.177002	1624.797769	1012.739937	2449.16252	2094.623648	1860.168916	4037.490916	1673.335882	1533.006098	725.5901631	2823.103631	1420.697967	1329.024709	1729.175557	2079.609137	1349.040659	2969.511084	751.1139774	3151.97028
PS(18:0/20:0)	65968.23693	3437.455255	28580.28925	44653.38018	51372.79363	7191.235975	88594.24286	41943.64989	59815.56252	23070.57114	24827.24269	23384.08006	13602.8282	36884.02297	40578.33842	35686.28293	21171.86586	17591.36953	12208.92969	24064.73656	53304.31019	60054.13477	59405.35539	43149.00082	17404.3917	3496.384061	28003.52822	111478.8493	28636.0815	25086.95546	31996.51372
PS(18:0/20:1)	1558.950253	0	3648.466552	5213.96305	1817.499473	0	3129.16788	3641.34644	5213.523567	6251.827403	4145.369636	0	2067.739833	2076.317864	4094.794512	5175.155296	1858.403711	0	2602.427827	0	4171.627971	4689.353246	5211.891883	1564.571494	4539.702628	1013.992003	5099.774977	5181.257166	2598.78579	1550.708347	1049.609457
PS(18:0/20:2)	1047.190337	0	4164.765954	3126.859754	4692.55001	0	0	1043.488603	4162.358514	0	0	0	0	2071.188772	4134.24717	3259.122776	1042.783764	1034.918972	0	0	783.6656671	2441.674301	1563.391666	1044.159048	3646.681421	0	3647.999991	0	0	2047.104716	1044.506748
PS(18:0/20:3)	464712.9801	259326.0429	356684.8799	594945.1426	571029.4305	326932.8657	509772.1083	366709.6844	554779.8656	594999.9442	153516.894	107462.2106	150427.1962	268449.411	233209.7308	663615.6201	636240.8633	159047.6715	165379.8936	133398.8133	509251.9548	522415.4369	419791.8384	598697.3733	364099.6247	253977.565	280582.1918	223399.5987	230227.6267	226645.589	334185.5259
PS(18:0/20:4)	10231.51086	5221.479318	7792.72816	16529.50384	21690.50235	0	28300.91167	16098.33014	9019.316279	5079.14064	4604.909266	11908.46952	3975.13644	6748.986719	13581.52088	31733.2751	15150.35738	8017.137686	13579.41097	12234.31641	19725.30078	12090.09574	21957.26259	21253.08407	5619.668898	1795.816647	11685.82372	4555.709897	14061.72371	12511.45955	15141.17935
PS(18:0/20:5)	0	3020.788646	1499.802329	1747.734628	956.9714753	0	1098.901129	2386.644458	3312.101147	1013.624903	847.5300589	1005.820964	833.2851967	918.811547	1168.504356	0	629.9267782	0	261.182987	1480.817024	1426.09492	1811.171307	2238.810168	1248.09154	3037.353633	0	2578.050516	1103.094871	1155.929432	1648.291694	2502.009897
PS(18:0/22:4)	1952.955358	787.7034866	1621.843557	3574.509151	3088.022235	1258.38751	2536.451835	1444.966415	2555.77185	1684.26877	1275.403109	840.0363034	1182.878356	1497.406738	2839.886173	1760.983242	1455.272728	822.8545963	1440.626307	2352.157433	3114.343673	2294.703815	1197.120176	1527.768476	3078.7284	1661.511457	835.2913761	2078.626821	3135.12394	2465.721421	0
PS(18:0/22:5)	41925.80453	27884.04401	52536.15836	56414.30547	60317.40963	21561.75176	75837.18446	57282.1855	63172.36074	35097.05495	32056.53618	23417.31898	18395.27879	51517.78659	47459.09555	43586.4607	42455.6167	26841.51543	24211.32532	18977.53088	67097.77915	47950.80759	31061.6148	36096.25992	39453.68354	61735.2114	42452.97469	30151.24541	22349.35225	35987.57159	30152.13302
PS(18:0/22:6)	939.5575962	0	2086.507909	2577.745454	4382.422137	1020.152857	3129.952731	0	2606.490777	1503.266349	1031.922478	0	1521.370485	0	1566.481012	5546.61754	1038.443182	0	3149.127297	0	3638.529759	1868.99287	2630.171258	0	0	0	1263.168664	2076.612951	0	0	1058.846203
PS(18:1/16:1)	5044.523458	2940.203454	7671.618617	10172.15523	6853.305213	1459.211993	10034.10413	3513.539497	4103.443925	8201.98391	2453.466863	4322.268671	3927.226796	5151.694661	9158.798343	9332.733074	1965.8725	13252.31617	4928.062607	11001.88181	15056.72594	7810.716626	6755.652582	7876.315344	1470.179928	3230.421743	10240.06493	12224.3163	9424.569325	2932.226967	5749.438954
PS(18:1/18:1)	3821.200584	0	2591.373104	2588.020853	8880.804234	0	7286.597738	9850.644499	2620.418295	2584.254956	2063.2048	3603.003355	5309.761889	983.9374599	2906.205409	12741.43304	5138.911789	7437.323658	1507.378816	3025.577062	6746.477019	5692.61704	5142.197616	6462.643937	3136.440011	4059.471259	7778.305817	8600.209543	1418.973751	0	6042.751863
PS(18:1/18:2)	7504.108152	0	13299.14031	4525.037461	24466.74501	1409.029186	21901.57288	11676.2264	4556.769753	4962.521234	1154.081326	11524.10829	3158.851847	4210.680258	6566.900498	17742.0984	5796.423431	14903.59602	14524.72414	19920.83394	20839.56106	11170.71399	21971.8562	23062.24336	5158.291266	6022.910576	7556.83299	12110.9451	10562.99863	1049.952339	14836.20925
PS(18:1/18:3)	0	0	0	0	0	0	0	0	0	0	0	0	0	0	0	0	0	0	831.9536011	0	0	0	0	0	0	0	0	0	401.6646145	0	0
PS(18:1/20:1)	0	0	1452.734803	0	0	0	0	0	0	0	0	1030.351952	0	0	0	0	0	1029.993619	0	0	0	0	0	1563.042791	0	0	0	0	0	0	0
PS(18:1/20:2)	0	0	1010.459868	0	0	0	0	0	0	0	0	1034.723234	0	0	0	0	0	0	0	0	0	0	1040.436808	0	0	0	0	0	0	0	0
PS(18:1/20:3)	1655.139501	1564.450442	1797.59243	1488.731823	8341.321168	0	4512.649951	4320.982023	1310.507642	3649.812007	1014.496276	2589.342171	1819.044657	0	2247.171165	8809.938213	1044.758118	1810.915785	4491.177516	2575.698935	2039.008923	2550.339078	4301.778106	0	0	1017.28901	6073.263997	3945.631912	1486.806859	0	4400.080711
PS(18:1/20:4)	25867.70853	5197.37103	36168.19166	52088.62967	74281.15685	5735.827959	51435.50136	44668.03108	24973.77867	15260.60991	15387.3646	42754.1711	6119.055459	25612.68548	44765.7467	63911.82875	29667.64388	38728.73067	35762.54666	47349.26556	54003.96125	41245.73637	64926.85839	31567.08636	10265.48861	10336.16168	38250.54581	49545.73171	40660.04541	16446.95492	67137.6754
PS(18:1/20:5)	1530.452915	1015.671677	1561.577154	2605.28248	5431.537925	0	3128.234285	2587.441691	3124.545514	1044.170595	2591.737087	1405.533485	0	0	1533.330078	1545.977301	1406.681387	2598.175411	2083.983881	0	1030.454609	949.3465893	4171.28548	1565.97567	0	1548.308265	2081.027211	5211.080095	0	997.2454592	7315.397231
PS(18:1/22:4)	0	0	1492.239736	0	0	0	1025.982428	988.3455773	0	0	499.1890691	4668.30205	0	972.239543	0	0	0	4142.811048	0	1048.150915	0	0	1132.72431	0	0	0	5179.002153	6238.495241	2653.904144	0	4404.043117
PS(18:1/22:5)	2610.579423	1031.093287	3849.31051	1513.355928	3181.853589	1555.698109	2960.92301	1529.433648	5094.556803	2607.495564	1813.223815	1030.29591	0	1069.494364	1004.272429	13989.61822	1739.971222	3180.802049	1708.628907	1974.691832	6778.826302	4480.529636	7288.388633	1562.54461	0	5743.840773	3364.968587	0	5342.437084	0	7406.501342
PS(18:1/22:6)	5067.408737	0	9831.177237	3115.116686	13705.15499	0	11847.54412	4677.332137	5543.021176	1203.314837	4677.649702	2519.004846	0	2328.43033	1779.404383	8285.324421	6290.034373	5200.675118	2449.003479	8522.938233	3130.745821	8628.363875	11541.37645	6243.502733	4110.487438	0	5252.1394	8366.780058	3481.340602	0	12788.90709
PS(18:2/16:1)	10632.89909	2775.105638	27324.92975	11624.01844	26305.55081	3639.023081	18817.05874	16886.08185	13413.66444	7510.478023	19130.10273	14223.5366	7153.559531	10787.75243	29163.09464	20293.85883	6953.79872	22074.68265	16070.92845	15711.82086	23989.19673	13538.4852	35173.35661	17187.47202	14402.18801	11208.12373	11710.04665	14710.87116	21933.70174	6323.116889	30494.64823
PS(18:2/18:2)	35371.54398	2071.70982	32222.04257	58010.54367	42249.94022	2596.774941	61484.36583	24881.26516	17735.87073	31034.07525	16163.46854	18520.84158	10790.59047	17259.67134	24397.13425	33709.50868	23213.50317	42248.10072	40572.11655	23373.02092	24730.51519	47966.17648	41693.56257	55785.69448	17713.51645	16956.28279	19949.22639	17032.08995	17934.10862	8770.699546	35109.84422
PS(18:2/18:3)	0	0	0	0	0	0	0	0	0	0	0	0	0	0	0	0	0	0	0	523.9700439	0	0	0	0	0	0	0	0	0	0	1755.655452
PS(18:2/20:1)	595.543245	0	0	0	0	0	0	556.829931	0	0	0	0	0	0	0	0	0	0	0	0	0	566.4776558	0	0	556.0588849	0	0	0	0	0	2114.811235
PS(18:2/20:2)	0	0	0	0	0	0	0	0	0	0	0	0	0	0	587.0798001	0	589.0772759	0	0	907.9216772	0	584.5057961	0	0	0	0	592.5449594	0	589.8869035	0	0
PS(18:2/20:3)	15942.35962	0	5010.773583	8715.422961	15415.39902	1040.700205	14725.45909	4823.651734	2720.015663	7840.127775	3508.904601	2718.925197	2475.418748	4705.457624	8161.657333	8901.386878	7424.985432	3970.726754	6979.029111	1838.621062	8033.573601	7407.099804	8147.584955	6856.959009	2603.916867	3145.574149	4430.804675	5597.436684	3358.963878	0	15305.136
PS(18:2/20:4)	54245.74901	5120.319302	34322.26283	136043.9709	92944.18268	17386.69519	134865.2616	68189.72795	20187.39074	29075.29341	34851.74082	26378.52335	19886.79629	23325.34783	92376.15521	79895.34704	51924.06398	25842.48013	36185.80399	40274.18269	105364.9238	55087.39785	50188.10776	40760.48355	21868.79076	38016.15125	34051.74097	27392.73997	65001.58975	49162.61775	90549.01137
PS(18:2/20:5)	4565.791111	0	1928.167258	4204.126786	4037.762748	0	9365.445808	1046.421521	1016.917997	3146.945004	0	1004.857288	1016.135849	0	2095.547981	1526.043172	1012.024075	1560.095796	1041.364472	2633.80315	1051.836553	2623.573103	3168.47833	1053.915385	0	1562.892172	3147.883023	8487.793683	0	0	8339.85086
PS(18:2/22:4)	2304.493908	0	5669.036378	5007.525367	4520.746932	0	5215.422756	7505.077395	3255.073873	1943.768348	3421.561314	3895.742503	990.3577358	2041.253286	1360.422432	8397.708497	2056.677786	2168.687424	1561.754095	2018.673621	11529.85798	5499.836035	4940.035636	5539.494423	2498.51011	1909.853717	5627.120481	3636.17743	1162.340022	1978.581623	2078.86259
PS(18:2/22:5)	1855.99067	1517.015253	5059.765224	4988.427267	7078.712426	1510.28572	4285.069707	2895.903776	10620.94868	4513.105628	1685.920228	2741.032702	1966.995391	0	0	940.6103603	2027.309888	3062.53754	1781.078995	2245.005083	7128.661931	7086.660685	9094.269136	9204.769619	1505.818951	1656.889105	1227.92932	3661.593054	2227.885774	1489.959702	9488.80982
PS(18:2/22:6)	4313.787948	2101.826063	8796.942862	5093.082947	12847.94576	1552.58893	12742.27289	5519.60817	5419.97122	4036.310612	1560.434589	1600.864361	2510.402675	1284.02753	2026.809527	2663.444339	1795.644116	2384.254476	8008.896364	10586.51074	3752.23115	8411.026614	12672.05049	6934.126163	2237.733207	1042.147557	2904.938035	1339.43242	4682.614379	2517.030393	8187.15743
PS(20:0/16:1)	29807.86717	4380.764279	36223.39843	26221.31697	34714.77286	11098.00103	106281.4605	17579.10097	24117.76135	19359.10684	36342.41545	27895.8564	6783.077778	26714.1981	48457.93959	15225.39074	15851.26421	14303.82197	2704.001504	24974.26673	25505.27007	45039.30825	92591.97735	15238.53313	9097.817295	3852.25572	27116.96157	114792.7255	20538.97141	18134.78743	55920.34199
PS(20:0/18:1)	3924.093256	0	7614.545024	4482.200959	10864.12291	1559.660451	9871.240141	8043.022027	7564.454871	3440.611182	7996.05945	5896.939184	1565.849273	2878.693683	1004.301454	3105.167511	3781.586596	6744.208452	3439.935624	3707.140465	7419.532688	8557.140785	6583.932441	2100.350924	7935.82467	3015.67572	7946.742763	2881.525659	6011.424698	4501.809123	4556.746314
PS(20:0/18:2)	256137.4404	39065.91181	449055.6069	543096.3804	688496.0096	53098.69841	682061.9912	348219.8064	264143.3669	469073.9646	399610.7556	400923.7441	159543.6401	344032.8018	609902.8522	393892.6489	357742.2122	280189.5644	213963.2239	267900.6714	316460.6804	720034.283	774829.7928	385077.8808	189554.3581	64897.71065	494302.4244	300577.4069	248281.7255	195651.6612	400406.596
PS(20:0/18:3)	3892.862747	591.4200149	3828.978083	13100.91796	14580.33385	4015.212911	18483.86283	1848.408809	5170.44295	4090.020853	6646.744361	3329.410254	5595.990776	3920.642713	7990.946604	8673.063571	6560.726008	10354.67338	3797.776186	3316.943539	11273.93118	7255.658769	22721.94772	9228.043435	1745.639106	866.7240042	6057.611444	14173.73153	3860.504124	6147.195773	4517.780768
PS(20:0/20:1)	1212.231011	0	2583.150029	4200.285032	2816.210659	1902.825898	4027.450241	3154.936636	1718.89956	2328.35057	0	2283.166403	866.2325663	1443.214897	4537.59629	2335.606791	2819.631466	2294.284297	0	1818.204387	1313.625818	4551.956649	1362.606923	0	1396.813613	1131.248365	220.2363805	1454.847373	579.1319235	866.9092233	2705.056925
PS(20:0/20:2)	5765.054225	845.8403913	8976.915118	11064.25651	14339.92663	808.8606912	13132.52079	7804.979077	6432.06447	7532.631569	5751.686244	10192.59818	2036.788411	10645.3936	14817.08501	8712.337004	8872.63945	7969.585772	2050.239958	6054.953621	9011.873064	13702.1827	20846.7566	9979.003805	5711.346195	1927.129792	10844.25403	5542.343774	8296.592466	2602.345009	10210.80638
PS(20:0/20:3)	32008.24588	3717.345525	37454.70892	42182.09428	23155.72132	7076.357969	97030.82818	31119.48236	28158.10159	28802.81618	40656.07812	49802.29513	16633.89761	41887.57609	67655.98937	26517.24912	13350.21303	17040.3876	3634.665707	36536.10085	41073.13255	49904.35102	55558.23917	26987.98193	11209.67651	7427.119603	26557.38168	77657.93759	30086.97447	27261.90798	61191.56747
PS(20:0/20:4)	66460.64204	5331.525055	104636.8898	136218.831	128936.3279	20092.46522	263955.4266	121017.0628	77292.11437	59502.04526	81088.96759	110550.7933	43157.16459	71839.91248	158758.6851	93996.69498	52530.51849	60974.09941	63915.0698	78349.25996	95782.99864	171502.2211	125518.1029	87633.551	43548.52494	15479.86073	94164.55107	151333.4021	93160.69138	62582.25369	191429.2448
PS(20:0/20:5)	4443.852632	0	2442.79803	3835.70088	4904.955498	890.9994222	13339.32658	3116.281721	2878.394108	3619.591806	1708.409076	2878.162359	3175.32153	2702.685286	1659.706381	1560.509867	3473.307659	1321.679542	1513.35909	1813.35908	6614.850563	4431.273577	8607.960589	3041.708374	2176.407071	0	6816.375493	15772.40754	1591.732253	874.858579	7694.409017
PS(20:0/22:4)	5579.836299	660.4859703	6570.132756	9193.65102	6993.660475	2047.709489	7500.926925	3605.285695	5464.177472	4654.317258	6518.375702	7638.813591	1452.428549	3696.465746	7344.556856	5890.144579	3765.197252	3413.140442	3876.248128	4529.618517	6207.997791	7206.898598	9747.575419	6500.662955	2210.206299	0	7116.571181	4297.455609	3538.603834	3273.214435	11617.41834
PS(20:0/22:5)	4321.25459	641.1869889	9164.98972	13880.7104	10194.08546	3533.522829	22162.78891	7087.325756	8831.691828	8929.053244	10879.49868	9955.875917	6177.500775	7694.05361	11383.35101	11793.69154	8935.527623	7128.095951	4409.671153	3456.539611	6998.552195	16398.33741	26032.36265	14050.59079	3930.404439	0	10702.96668	10006.11218	5892.422695	2934.347522	10735.63171
PS(20:0/22:6)	11942.30441	733.8082816	23392.47097	17756.07264	38977.06757	1290.766214	47803.10962	18862.51652	18285.39966	25168.78836	17803.69443	13394.18597	13373.12704	13491.98496	31869.78981	10643.32409	18450.83168	7780.771054	3406.757676	6143.526626	6561.44035	30531.83663	51190.81215	16007.40532	7137.283553	1901.521146	11315.43521	24908.89323	6700.484556	6393.613159	19293.84328
27 OH cholesterol	0	0	0	2.362506594	0	0	0	0	0	0	0	0	0	0	0	4.02491	0	0	2.137617327	0	0	0	0	0	0	0	0	2.746931026	3.212760891	0	1.606187922
Cholesterol	9952.552796	9943.199083	9958.912676	9929.472306	9948.836136	9934.866618	9967.458332	9947.666335	9954.640734	9921.517935	9951.555621	9967.761124	9955.615646	9940.587819	9932.597845	9963.213487	9902.138941	9939.731735	9964.696693	9976.575607	9938.020562	9959.288893	9890.742326	9946.212477	9840.653264	9970.946478	9929.565717	9954.867518	9955.206549	9934.244771	9970.967553
MAG 16:0	0	0	0	0	1.836741191	0	0	0	0	0	0	0	0	0	0	0	0	0	0	0	0	0	0	0	0	0	2.59055401	0	0	0	0
MAG 16:1	5.575625959	5.168181223	8.180087325	4.688742649	3.835589902	6.55085922	2.35044692	3.009390267	1.61255883	2.842938201	2.667054247	4.791691494	12.97021906	0	7.644246921	0	7.425873024	5.941094753	3.886866581	0	8.573570148	10.94862172	7.722332288	1.989927675	8.383243523	3.281283009	4.829323592	0	3.776441739	3.634729935	1.177688156
MAG 18:0	3.299950116	9.868031061	1.509465751	0	1.340790113	4.995027414	2.135572542	0	0	4.457460005	2.435319464	2.568184565	2.556920722	14.44731538	8.057407918	0	0	14.11556595	0	0	0	1.545408207	14.21079734	1.881442501	7.87366174	3.454935198	2.838475479	2.794333708	7.182441223	0	4.358309298
MAG 18:1	6.213085135	6.00381836	15.38190077	14.98966963	13.40984514	2.800482157	6.99187435	10.15465673	16.52917773	6.487756127	8.290247301	1.945664679	7.170287503	0	6.929110921	4.869025258	28.8870664	6.257614139	1.986388618	3.152628498	24.43170518	3.170670304	16.26378737	24.49010048	20.17442493	8.032847438	13.17668665	5.248497811	4.084287252	9.167459437	1.995453998
MAG 18:2	4.725984573	10.34626529	0	5.372286141	2.821866217	2.223233407	4.567287181	0	0	7.410947011	0	2.21249631	0	0	3.885591202	4.02776843	12.40627598	11.27093682	6.349511369	1.540495897	1.909629618	4.349032771	6.392790636	0.825384083	1.256176873	0	3.883430976	1.892397697	0	0	1.302664378
MAG 20:0	1.732275949	0	1.621933193	10.18166342	4.700595972	9.149937039	0	5.901922342	2.99482134	14.81304585	0	3.830762418	0	7.175293023	5.763837046	2.427384584	5.772870963	0	2.137914296	1.451389083	3.97048002	1.257563097	9.038135583	2.879271268	6.660036978	2.406142888	0.50716837	0	0	4.881453742	2.002482556
MAG 20:1	2.026771895	9.753957131	0	4.842046577	0	6.673866538	0	4.31525595	5.445746231	5.450869129	0	0	2.328971272	0	4.63540233	2.686544555	0	0	2.796894757	0.766169557	5.454721359	0	4.253960961	5.68820192	6.660810415	0	0	0	0	0	0
MAG 20:2	0	7.823521873	0	0	0	0	1.834808757	0	4.977040403	0	5.074275645	2.182725835	0	0	4.394641993	0	0	1.829873571	3.561122971	0	2.464554919	0	6.99743755	1.948930314	3.572500283	0	10.31989635	2.528272906	6.423024077	13.29788652	2.408069535
MAG 20:3	1.706435634	0	0	1.965809169	2.781900035	0	0	2.673332726	3.770599493	2.96063149	7.331908533	3.27569019	0	2.900119012	0	0	0	0	1.413064365	2.05817902	0	1.177599512	4.370674077	0	1.767249092	1.21095187	0	6.964704312	3.20962448	0	1.451339887
MAG 20:4	1.684257527	0	0	0	3.64851141	2.961490318	0	0	0	0	2.298887469	0	4.963142401	4.894664361	6.875238914	0	0	0	1.424002994	3.625279962	5.127821202	0	0	1.894956839	0	0	7.68176757	0	0	0	0.395802973
MAG 22:0	1.805897426	0	1.806453889	0	2.819082419	2.224322969	2.775470891	2.932310599	0	2.964068152	6.026695473	2.183295047	8.268593824	0	0	6.713422862	8.046425884	0	2.871113159	0.750691918	2.729552365	1.563439839	0	0	0	0	5.671723867	2.798510797	3.267233432	7.9517622	3.918289322
MAG 22:1	0	0	1.970732707	2.420479857	2.763913741	2.651538541	2.180240212	0	2.492610487	8.794047542	2.926070307	0	0	6.759280414	4.656036618	4.027463183	0	2.235580197	0	2.062403528	0	0	4.52045867	1.552637964	0	0	0	2.903582255	4.078586959	10.8064765	3.838139314
MAG 22:2	0	3.864839621	1.535899886	3.632680537	1.881948938	4.191248258	2.266950941	3.654895899	3.769161023	2.869746407	2.382363536	2.154459688	0	4.29793477	3.492818421	2.636955768	3.032683317	3.380688865	2.124002127	1.348313285	0	2.162150172	13.98788834	3.550167379	3.885233161	1.221818483	0	4.563596289	0	0	0
MAG 22:3	0	0	3.969533391	0	0	0	1.474776949	0	0	0	0	0	0	4.43019228	0	0	3.794305126	3.856099667	0	2.039173329	0	0	4.578583187	1.948869807	0	1.191298184	0	3.295338477	0	4.530367857	1.45133985
MAG 22:4	2.637019222	0	0	5.415456481	2.803936789	3.526448658	1.851330186	3.910468444	3.767550464	3.304467564	2.925924571	0	0	0	3.245325248	0	5.813122797	0	2.137534223	2.048133943	0	0	0	0.855990786	0	2.124194116	0	2.798358816	3.617977886	0	0
MAG 22:5	3.366535498	0	1.959584149	6.008467728	1.872527529	6.065565894	2.698904142	5.229230287	0	7.392425954	2.875447655	3.104520975	2.372153445	0	2.329799425	2.686544433	2.590306236	4.504680727	1.330922154	0	0	5.465508224	0	0	10.57752435	1.104076846	7.767414655	0	5.941073382	5.403169924	2.613134003
MAG 22:6	0	0	0	0	0	0	0	0	0	0	0	1.974284296	3.310188477	0	0	0	4.769674087	0	0	1.570479196	2.729552364	2.345976726	0	0	4.014393961	0	0.974746427	2.795675168	0	0	0
S-1-P	0	0	0	0	0	0	0	0	0	0	0	0	0.443877002	9.276220931	0.07461999	0	12.76042778	0	0	0	0	5.089078882	0	0	67.58583253	3.363351604	3.053272594	0	0	1.028622852	0
Sphingosine	12.67336474	3.97230219	3.151732705	8.647884786	4.646614289	11.11936118	1.414004799	10.55220197	0	8.73366173	3.210185264	2.01510043	0	5.231161318	5.418077685	2.686493538	2.562027641	6.876130499	1.146352533	1.011055387	4.587850348	1.636057973	16.92082849	4.281641638	16.93564865	1.662622836	7.139822464	3.802282279	0	5.053299799	0.513545685
