# Supplementary material for: Plasma Lipidomics Profiling to Identify the Biomarkers of Diagnosis and Radiotherapy Response for Advanced Non-Small-Cell Lung Cancer Patients
Source: J Lipids. 2024 Jan 27;2024:6730504. doi: 10.1155/2024/6730504 (PMC10838201; doi:10.1155/2024/6730504)
Supplement: Supplementary Materials — The original data for all analyses in this manuscript are provided in the supplementary document, according to the corresponding subgroups. The corresponding subgroups can be obtained according to the supplementary file name. [file 6730504.f1.zip › Squamous cell carcinoma vs. adenocarcinoma patients in pre-RT group.txt]

Sample	26	27	28	30	32	33	34	36	39	41	42	43	47	49	50	51	52	53	54	56	29	31	35	37	38	40	44	45	46	48	55
Group	Adenocarcinoma	Adenocarcinoma	Adenocarcinoma	Adenocarcinoma	Adenocarcinoma	Adenocarcinoma	Adenocarcinoma	Adenocarcinoma	Adenocarcinoma	Adenocarcinoma	Adenocarcinoma	Adenocarcinoma	Adenocarcinoma	Adenocarcinoma	Adenocarcinoma	Adenocarcinoma	Adenocarcinoma	Adenocarcinoma	Adenocarcinoma	Adenocarcinoma	Squamous carcinoma	Squamous carcinoma	Squamous carcinoma	Squamous carcinoma	Squamous carcinoma	Squamous carcinoma	Squamous carcinoma	Squamous carcinoma	Squamous carcinoma	Squamous carcinoma	Squamous carcinoma
FFA(14:0)	0	987229.266	1159860.658	941655.2389	1081619.04	1090417.981	1144077.289	2258998.576	1034921.149	2363404.083	0	0	787018.8932	306629.2642	853534.1738	770517.432	488948.1716	0	0	1266318.902	980076.8027	1012161.134	683927.9573	490167.8469	1084827.854	1058562.24	430777.3224	639678.9337	468712.8666	97274.16233	663682.9733
FFA(14:1)	0	1036729.616	702191.3662	740293.7687	646399.6903	663825.4697	676663.9212	776155.2837	684835.9729	480718.3635	0	0	443153.3474	697241.4864	532365.7751	732481.3651	477316.8812	0	0	895062.7228	735387.5287	803661.2903	319969.3438	508486.9673	924767.2538	787978.1157	696123.7947	663175.8564	662152.1795	540333.4202	977844.246
FFA(16:0)	0	8157551.074	14996505.43	52589399.35	6196825.179	9411235.668	5147960.696	19725938.41	17972192.75	19779668.51	0	0	9658726.585	7098303.761	8089638.295	12519014.9	7794123.52	0	0	17164179.13	8132615.8	15967506.92	6387393.072	11391971.32	16112127.57	12681752.24	5331445.017	11567680.41	6902217.838	4936766.705	7748261.827
FFA(16:1)	0	270120.6257	1070427.011	1331064.741	1362795.798	1783963.315	1332751.549	3749633.905	1417614.603	2685817.94	0	0	1541823.303	1408008.655	1479573.592	1634767.021	603161.3088	0	0	1489311.347	471595.0224	1172652.464	409065.4891	1059037.701	1234129.797	1065961.245	518190.1091	1770795.346	441141.2727	704297.4966	1083717.942
FFA(16:2)	0	374236.4603	749556.737	630368.9936	733350.4429	212505.3237	740295.7581	530007.7901	739514.091	262839.475	0	0	344379.6827	257179.4494	319704.2689	362525.3642	339807.1186	0	0	253682.367	244078.6495	669449.124	265501.4376	312707.656	725534.6458	688378.049	253040.763	381804.5754	389856.2943	265850.7226	247666.9559
FFA(18:0)	0	5537799.323	5781736.172	25074943.88	5320907.262	4175697.539	3673095.831	10297397.46	7977366.961	6780380.409	0	0	7667020.336	6125749.435	8570835.954	17751898.06	10748375.73	0	0	11443545.44	6353916.013	9804256.656	10171748.02	12640886.74	9651736.465	6878462.812	4905477.679	8545885.674	7657094.317	5270841.336	8473013.692
FFA(18:1)	0	15495893.8	30482530.61	74183584.95	11851420.15	20185019.52	6341031.739	33666249.12	39427661.31	25527368.02	0	0	22932279.92	24649292.71	30001155.04	38259339.52	27812828.28	0	0	30651039.35	15391167.74	34315105.3	16835210.88	36217246.42	30088485.31	23845537.73	10973436.12	31158249.19	11588577.71	20220873.53	18952343.76
FFA(18:2)	0	9735261.771	13895338	61491967.18	8196969.873	10115461.8	3380162.112	15532286	22001193.53	17487779.33	0	0	15493438.42	15158384.77	14874153.68	21126636.32	18290959.88	0	0	18819501.85	10019101.5	17438432.77	9353420.065	21729097.88	20408998.58	20122901.38	8063669.182	16250115.07	6563879.417	11485328.01	8900745.32
FFA(18:3)	0	534062.7728	526928.0543	8407620.974	823188.9262	676976.8187	214662.48	750006.3633	1324728.125	996450.5494	0	0	903729.3291	803541.5412	754375.7029	1047874.837	1041070.04	0	0	760785.0032	513171.2468	866580.3872	569385.9638	1093459.446	1106613.045	1760963.189	443310.6965	784536.5823	326174.1303	537914.8139	771638.5446
FFA(20:0)	0	2546677.524	1416873.578	1909654.306	2562636.956	2202389.838	3028682.108	1867396.497	1893201.813	1501382.322	0	0	1883807.991	1972671.995	1466775.908	3056615.258	1708111.625	0	0	1137817.642	2736114.575	1777739.881	1727484.304	5393311.028	2644531.179	2250236.735	439949.8541	900497.0055	1839986.556	1454532.85	435789.4309
FFA(20:1)	0	268590.8971	947698.1826	1789470.653	362888.4224	320790.4997	301837.4781	874088.447	833566.8906	609213.8054	0	0	379435.8077	376017.6289	665001.2012	1027865.71	1396834.691	0	0	770729.7706	334840.1716	1065959.571	429228.9387	1083635.253	1108834.449	363614.322	243758.5475	473805.669	168446.2355	452019.9174	441900.6308
FFA(20:2)	0	201755.1238	417747.4546	1448705.001	196688.9998	250402.2683	91320.55551	416711.3655	496387.5456	244946.5065	0	0	379159.7356	382778.9244	535756.4799	716726.3867	525958.6693	0	0	526249.2684	271133.6331	514924.581	369788.0546	627650.6353	410121.4451	315047.7628	248449.3363	379142.5015	253920.5886	324737.0084	273415.9539
FFA(20:3)	0	400636.6311	433502.3652	1000883.121	431389.8635	354071.5612	435062.8532	404957.9719	466667.7884	407468.7885	0	0	491550.2262	774998.1186	490080.5898	889267.124	394316.3019	0	0	442747.3933	511811.867	375061.7247	352288.3224	957456.095	413108.5531	398060.4496	280785.5192	692394.9433	363944.7012	734139.9818	313531.5887
FFA(20:4)	0	286216.1638	571516.7991	2298194.949	454973.5321	771360.9924	352659.9558	1115312.663	957971.8998	371860.0645	0	0	1718856.202	992124.8494	964553.5093	1112341.535	823846.079	0	0	1054584.456	408230.7841	622048.8963	520668.5699	1164199.584	843933.5128	449920.1066	603192.4842	652349.056	719190.3055	732308.4767	850695.9677
FFA(20:5)	0	245807.3502	223727.4018	217207.782	201348.0039	322825.3238	218951.1539	325163.2884	215485.303	215183.6174	0	0	328944.437	447788.8627	768995.683	935375.5931	757552.8703	0	0	340249.7798	1414676.724	191159.2023	581929.5212	280547.3049	166264.7705	228533.5645	264106.1737	372737.1032	1877641.388	419529.9722	554267.1494
FFA(22:4)	0	120813.6923	274484.0848	955271.8917	100167.7807	284404.222	87168.81298	379626.3088	480986.6761	129445.1018	0	0	256162.5305	242928.0671	425010.9276	313092.2166	417035.3974	0	0	307691.4798	214080.203	282112.762	295485.5523	619320.7801	260973.381	173243.8959	115887.0355	248768.3773	174054.6527	218031.2911	179103.1111
FFA(22:5)	0	119474.7132	488654.6466	1219599.58	372425.3139	286058.1739	190579.4896	320388.4578	541181.7409	176812.0559	0	0	161206.6389	234069.4232	210962.7038	224516.6156	322367.5694	0	0	332900.1047	105460.616	205599.6189	243706.6914	401249.9859	260217.2395	125375.7613	213352.5124	250497.2158	142793.9851	199719.284	348884.3128
FFA(22:6)	0	181143.8299	209241.9959	1360702.704	1163936.713	352931.5082	132817.7968	367985.9025	416879.1149	254989.5786	0	0	279619.4413	166682.718	295531.9555	330545.9298	358420.1191	0	0	448042.4614	114431.6522	236863.6952	342790.8578	468463.1696	248859.0563	98863.17628	156355.7325	344994.7127	206250.8314	300832.1234	168072.3281
FFA(24:0)	0	15865853.4	19605826.59	29232515.7	6146509.557	20387547.24	7371918.169	32651160.66	7149391.673	656750.6776	0	0	4688410.407	10990625.91	17961144.3	4188302.193	11897645.78	0	0	11659869.39	7995082.123	3389630.66	1483344	17542793.76	11366564.95	11123915.57	3999343.576	16461535.1	24003312.62	33691148.52	5944274.816
FFA(24:1)	0	192791.7918	471048.2311	257841.7714	102518.6429	229562.2719	42377.9752	273007.8607	117325.2726	191027.675	0	0	279036.7266	332383.4742	443776.6285	677903.787	1007092.577	0	0	205724.6566	257143.1653	351933.5627	323990.9001	839718.8614	365258.9012	41599.75158	69351.5769	132327.9651	76122.35788	235349.12	197894.9882
LPA(14:0)	0	0	0	0	0	0	0	0	0	0	0	0	0	0	0	0	0	0	0	0	0	0	0	0	0	0	0	0	0	0	0
LPA(16:0)	1218.583677	5243.329808	1490.979943	2074.730118	1756.57505	1674.847509	2537.717687	2326.66773	1229.896604	2370.252152	0	1011.954837	2112.233932	1134.626785	1332.078512	1336.981153	907.3801265	2006.979029	1011.954837	1618.243746	1719.134426	0	987.221398	1280.266653	1556.142469	651.2544809	2845.444293	0	0	445.4341182	0
LPA(16:1)	0	0	0	0	0	0	0	0	0	0	0	0	0	0	0	0	0	495.1487392	0	0	0	0	0	0	0	0	0	0	0	0	0
LPA(18:0)	801.0189123	617.6490823	0	0	0	0	0	0	0	680.2821618	1100.672347	600.6263086	0	0	935.3607694	0	0	897.3975055	600.6263086	0	0	0	0	827.3816524	0	1484.589256	356.6076879	0	0	0	992.3076833
LPA(18:1)	631.2021495	0	0	547.4689404	0	0	0	411.4219262	0	0	0	0	0	0	0	513.5652321	0	0	0	0	821.3859477	0	0	822.0084722	0	0	0	0	0	0	0
LPA(18:2)	0	0	434.5072972	0	652.5732682	0	0	0	0	0	0	0	0	0	0	0	0	396.2770067	0	0	794.0424462	578.7130042	0	0	0	0	0	0	0	0	0
LPA(18:3)	0	0	0	0	0	0	0	0	0	0	492.2370303	0	0	0	0	0	0	0	0	0	0	0	0	0	0	0	0	0	415.2127133	0	0
LPA(20:0)	0	0	0	0	0	0	0	418.1059543	0	0	0	0	0	0	0	0	0	0	0	0	0	0	0	0	0	0	0	0	0	0	0
LPA(20:1)	0	0	0	0	0	0	0	0	0	0	0	0	0	0	0	0	0	0	0	0	0	0	0	0	0	0	0	0	0	0	0
LPA(20:2)	0	0	0	0	0	0	0	0	0	0	0	0	0	0	0	0	0	0	0	0	0	0	0	0	0	0	0	0	0	0	0
LPA(20:3)	0	0	0	0	0	0	0	0	0	0	0	0	0	0	0	0	0	0	0	0	0	0	0	0	0	0	0	0	0	0	355.95
LPA(20:4)	0	0	0	776.5522407	0	0	0	709.1353947	0	484.82758	0	396.2615373	0	0	0	0	0	0	396.2615373	0	0	0	0	0	0	0	0	0	0	0	0
LPA(20:5)	0	0	0	0	0	0	0	0	0	0	0	0	0	0	0	0	0	0	0	0	0	0	0	0	0	0	0	0	0	0	0
LPG(14:0)	333.4314307	0	0	345.802712	0	487.9766456	0	585.6643188	0	816.3331123	452.9822388	565.8279154	0	0	346.9254469	482.9246373	0	779.1338167	565.8279154	0	479.0111555	356.9214909	578.8690129	855.8922787	674.3347109	0	602.2022951	0	0	612.1853903	0
LPG(16:0)	6715.792036	2168.208936	4746.326421	2208.429127	1858.854363	665.5030378	4191.634344	2216.950985	4898.829864	6546.194167	3590.728875	7267.303552	3390.931495	2605.639569	3373.642517	620.8995317	1448.934449	2608.507578	7267.303552	1682.346947	970.1133349	1865.155107	1778.348166	1248.326499	3178.649339	3665.411425	1196.310005	1408.957135	790.8074216	1140.950255	831.2768411
LPG(16:1)	957.9292414	231.779038	549.4625004	489.7484279	322.8677356	506.7126911	209.0456198	883.7497596	851.5746511	722.521564	1192.038619	1335.318829	381.9469557	0	618.9928906	351.9617541	222.342748	0	1335.318829	550.9644026	423.6738046	363.5775227	244.1106464	647.1652918	215.3181962	0	401.2075806	639.7703874	454.6316371	539.1766379	257.7504665
LPG(18:0)	3183.293057	3392.957753	1627.503088	5279.248979	3698.021904	4211.960927	3156.277982	5503.206869	2743.09224	5367.286926	4552.119347	3207.305235	17331.85854	5338.91037	6735.428197	6092.463054	2123.670084	2276.112883	3207.305235	4859.297194	3139.639609	2839.029609	2374.007551	3391.784213	5866.880648	5273.834779	2072.1818	1163.985516	2558.306757	2952.836453	1976.43715
LPG(18:1)	12396.56723	15643.59205	13013.63222	23815.4573	7881.220275	11789.65231	9206.947528	14015.90524	18882.34414	14776.4308	12984.68404	25177.10586	21670.69153	13284.01437	23981.94147	17049.78771	8652.883625	6458.475633	25177.10586	16084.26181	19286.87124	16830.19692	9013.783196	11588.61323	16929.61929	12346.46486	6331.620266	11746.44503	8232.617482	11969.47429	11879.72246
LPG(18:2)	10327.70738	3736.523794	4703.665474	9457.372692	2655.095057	5081.719366	8476.223592	4862.718633	3832.533522	12706.05708	7857.871485	11087.72182	10219.55411	4295.881774	13755.92922	6166.169466	7096.272605	4880.182351	11087.72182	7217.589642	9292.953783	6290.087287	6322.668817	5549.664325	8565.384539	11132.32727	4275.31571	6668.543035	7459.747211	4007.61802	3077.000766
LPG(18:3)	1882.060485	531.2922051	209.3022926	747.5729899	429.1687088	2253.484298	338.3868649	576.220075	641.2158504	449.4742464	1117.503769	746.5730708	385.3243584	2237.728427	669.3609873	0	731.9773803	906.3768091	746.5730708	691.4882496	744.695773	536.9203749	320.2660025	0	461.803837	390.9495463	996.6164802	1202.207289	882.1233826	599.7314967	866.1000322
LPG(20:0)	539.1930841	287.2649961	200.1648861	493.5134539	288.3873574	427.6963765	221.5294298	575.115155	0	0	957.3608504	445.042298	498.2861678	461.6283885	0	700.0692336	397.6900994	0	445.042298	507.0763491	406.4652024	0	0	0	0	298.721038	0	0	404.6897073	597.0850657	448.156912
LPG(20:1)	607.9805692	0	0	0	0	1579.567941	0	0	1049.405121	521.6649449	1516.539694	301.2377304	0	0	0	0	0	606.3291508	301.2377304	0	0	0	0	1053.518547	0	2159.009335	0	0	0	0	0
LPG(20:2)	961.3391801	805.5055237	660.7140746	2593.741443	816.614338	0	909.3356761	1678.296317	1791.485352	790.6952864	409.2717933	443.3996285	649.97016	762.6043864	1398.675185	471.6061609	987.1022784	1200.041486	443.3996285	900.5915226	1474.411205	1078.238705	378.9499693	1172.029147	1503.70298	1105.552664	935.9027603	316.1363473	552.6483166	735.0165794	318.9647314
LPG(20:3)	838.9390211	333.8327004	0	686.1459714	628.3413066	825.9442378	1397.161488	934.3750344	793.0695671	760.458729	402.3290112	907.7147822	1310.005305	0	1205.151127	366.2914035	0	390.4346726	907.7147822	218.6004842	434.2890819	426.26482	1520.981924	580.743454	1467.844902	714.9904124	635.7050927	173.9515052	0	0	341.1141724
LPG(20:4)	645.0895122	1038.099245	430.3196355	652.7003753	247.3348856	241.2722594	343.8755217	0	434.8821425	322.6205119	0	1035.957535	929.9819187	405.3148969	0	319.5149998	0	848.8038309	1035.957535	184.9097142	645.7521265	0	0	242.721116	327.7923607	514.2681623	0	496.8495654	0	0	0
LPG(20:5)	1005.193156	790.4445021	188.8871792	526.4222867	454.8662302	626.2755636	362.3035205	742.2808838	440.3755674	1162.854822	793.6151601	529.9773698	0	839.1768959	387.7961985	253.0733316	797.0771031	445.1880434	529.9773698	936.9813271	500.7881459	253.0528833	0	471.6336645	331.0147881	340.6860418	190.8130344	0	292.049673	715.4588832	422.2840175
LPG(22:4)	504.7649379	369.1134957	259.0973249	353.2480327	417.8649176	680.1217917	522.4680221	0	394.7081541	257.4325577	908.7734571	779.8106074	499.8085893	539.1676985	531.718581	379.1599585	560.0775682	527.9312876	779.8106074	431.5621512	305.895357	524.9308746	0	295.5006208	528.4543859	321.378915	464.9485965	266.4002285	475.0252559	0	343.8506369
LPG(22:5)	621.5459223	996.1441059	921.0195624	1312.678935	636.6206998	1534.328434	1015.291077	631.8826771	574.785353	657.4404359	0	0	446.4132872	657.9820641	479.0834901	477.1540082	0	0	0	740.9943212	741.8336965	828.6352518	0	1527.002402	827.0250611	1399.659648	361.4974382	288.8479975	287.6766071	620.1703925	401.1396309
LPG(22:6)	621.9055824	602.1930444	500.2657914	829.4104015	469.856287	585.3980179	502.9463936	480.4639668	0	794.7478727	0	0	511.0803394	364.0935092	517.043123	0	481.1441913	1158.881481	0	443.6492326	363.538378	496.0484388	0	781.3804931	824.2081545	727.8310022	0	0	709.2606879	0	134.3115579
LPI(14:0)	0	0	0	0	0	0	0	0	0	0	0	0	0	0	0	0	0	0	0	0	0	0	0	0	0	0	0	0	0	0	0
LPI(16:0)	1636.504279	0	0	0	0	0	0	1190.402964	0	888.4125317	0	2021.054318	0	0	0	0	0	1181.269411	2021.054318	0	0	0	0	0	0	0	0	0	0	0	0
LPI(16:1)	0	0	0	0	0	0	0	0	0	0	0	0	0	0	0	0	0	541.3435555	0	0	322.8966904	0	0	0	0	0	0	0	0	0	0
LPI(18:0)	0	0	0	0	0	0	0	0	0	0	0	0	0	0	0	0	0	0	0	0	0	0	0	0	0	0	0	0	0	0	0
LPI(18:1)	0	0	0	0	0	0	0	0	0	0	0	594.5744833	0	0	0	328.9608081	0	0	594.5744833	0	0	0	0	0	0	0	0	0	0	0	0
LPI(18:2)	837.8383111	0	0	0	0	0	0	0	956.9366625	0	502.7118999	501.7012826	0	0	0	0	0	0	501.7012826	0	0	0	0	0	0	0	0	0	0	0	0
LPI(18:3)	0	0	0	0	0	0	0	0	0	0	0	396.0669053	0	0	0	0	0	0	396.0669053	0	0	0	0	0	0	0	0	0	0	0	0
LPI(20:0)	0	0	0	0	0	0	0	0	0	0	0	0	0	0	0	0	0	0	0	0	0	0	0	0	0	0	0	0	0	0	0
LPI(20:1)	618.469155	0	0	0	0	0	0	0	0	0	0	0	0	0	0	0	0	0	0	0	0	0	0	0	0	0	0	0	0	0	0
LPI(20:2)	0	0	0	0	0	0	0	0	0	0	306.6824899	0	0	0	0	0	0	0	0	0	0	0	0	0	0	0	0	0	0	0	0
LPI(20:3)	0	0	0	0	0	0	0	0	0	0	0	0	0	0	0	0	0	0	0	0	0	0	0	0	0	0	0	0	0	0	0
LPI(20:4)	505.308203	0	0	0	0	0	0	0	0	358.1394552	0	277.9896609	0	0	0	0	0	0	277.9896609	0	0	0	0	0	0	0	0	0	0	0	0
LPI(20:5)	613.5703688	0	0	0	0	0	0	0	0	0	0	613.546762	0	0	0	0	0	0	613.546762	0	0	0	0	0	0	0	0	0	0	0	0
LPI(22:4)	387.209428	0	0	0	0	0	0	0	0	0	0	0	0	0	0	0	0	0	0	0	0	0	0	0	0	0	0	0	0	0	0
LPI(22:5)	0	0	0	0	0	0	0	0	574.0103902	0	0	0	0	0	0	0	0	704.6600959	0	0	0	0	0	0	0	0	0	0	0	0	408.8642981
LPI(22:6)	0	0	0	0	0	0	0	0	0	0	0	0	0	0	0	0	0	0	0	0	0	0	0	0	0	0	0	0	0	0	0
LPS(14:0)	0	0	584.8156109	0	0	0	0	0	0	0	602.4873378	500.5213018	0	0	0	0	0	600.2641974	500.5213018	0	0	0	0	0	0	0	0	0	0	0	0
LPS(16:0)	1042.117002	2458.807711	826.8604516	2904.809519	2572.128511	963.8801149	1743.205907	2270.461309	3490.396478	2274.725278	0	512.2162433	2574.721737	1850.799687	1229.532481	2128.991152	1572.695376	995.1893063	512.2162433	1751.328868	1615.152741	1918.637084	1142.087562	2505.618212	1844.877708	1483.299027	1760.396347	0	1237.114326	567.2826705	1386.530313
LPS(16:1)	0	0	0	0	0	0	0	0	0	0	0	0	0	0	0	0	0	0	0	0	0	0	0	0	0	0	0	0	0	0	0
LPS(18:0)	1317.346642	723.0689803	0	1327.367605	1067.669855	0	0	837.2341863	0	687.1468255	1005.510294	0	0	0	525.5998829	0	627.3110836	1358.228836	0	0	727.4697683	0	0	1359.302071	878.0773705	883.7069783	991.9926313	0	0	0	512.2261039
LPS(18:1)	488.728252	0	0	0	0	0	0	0	0	0	669.0566141	858.0743311	0	0	0	0	0	384.7960303	858.0743311	0	0	0	0	812.0746304	0	0	0	0	406.7729409	0	0
LPS(18:2)	0	0	0	0	0	0	480.4538259	915.3527616	0	0	0	345.0422678	0	362.7626509	0	0	0	0	345.0422678	547.9054235	0	0	0	0	0	1193.507923	0	0	0	0	0
LPS(18:3)	0	0	0	0	0	0	0	0	0	0	0	0	0	0	0	0	0	0	0	0	0	0	0	0	0	0	0	0	0	0	0
LPS(20:0)	0	0	0	0	0	0	0	0	0	0	0	0	0	0	0	0	387.4773308	0	0	0	0	0	0	0	0	0	0	0	0	0	0
LPS(20:1)	0	0	0	0	0	0	0	0	0	0	0	0	0	0	0	0	0	0	0	0	0	0	0	0	0	0	0	0	0	0	0
LPS(20:2)	0	0	0	0	0	0	0	0	0	0	0	0	0	0	0	0	0	0	0	0	0	0	0	0	0	0	0	0	0	0	0
LPS(20:3)	0	0	0	0	0	0	0	0	0	0	0	406.6201362	0	0	0	0	0	0	406.6201362	0	0	0	0	0	0	0	0	0	0	0	0
LPS(20:4)	0	0	0	0	0	0	0	0	0	0	0	0	0	0	0	0	0	0	0	0	0	0	0	0	0	0	0	0	0	0	0
LPS(20:5)	305.6606421	0	0	0	0	0	0	0	0	0	307.6391323	0	0	0	0	0	0	0	0	0	0	0	0	0	0	0	0	0	0	0	0
LPS(22:4)	0	423.8004545	0	0	0	0	0	0	0	0	0	0	0	0	0	0	0	0	0	0	0	0	0	317.293209	0	0	0	0	0	0	0
LPS(22:5)	0	0	0	0	0	0	0	0	0	0	0	0	0	0	0	0	0	406.6399996	0	0	0	0	0	0	0	0	0	0	0	0	0
LPS(22:6)	0	0	0	0	0	0	0	0	0	0	0	0	0	0	0	0	0	0	0	0	0	0	0	0	0	0	0	0	0	0	0
PA(14:0/14:0)	0	0	0	0	0	1049.371016	0	0	0	0	0	0	0	0	0	0	0	0	0	0	0	0	0	0	0	0	0	1012.955995	0	0	0
PA(14:0/18:1)	0	0	0	1048.805054	1049.428993	0	0	0	0	1518.573589	0	0	0	0	1513.160038	0	0	0	0	0	1049.529878	0	0	0	0	0	1000.676802	996.0398637	0	0	0
PA(14:0/18:2)	0	356.6174146	0	0	0	0	954.9149642	0	707.3034014	0	0	0	0	0	0	0	0	0	0	0	947.0069292	0	0	0	0	0	0	174.5041187	0	0	341.1264619
PA(14:0/18:3)	0	477.7270385	0	0	222.2301729	443.3849034	0	0	0	0	0	0	0	412.5189989	333.7811598	0	0	0	0	0	997.0305896	0	0	0	539.3231056	0	0	0	0	0	0
PA(14:0/20:1)	0	0	256.6847035	0	0	383.2706657	0	0	0	1047.401736	0	0	0	0	0	0	0	0	0	0	0	0	0	0	367.9514529	0	0	1128.724831	0	0	878.5187626
PA(14:0/20:2)	0	1052.751404	0	0	0	0	0	0	0	0	1083.394961	0	0	0	0	0	0	0	0	1034.26308	0	0	0	0	0	0	0	0	0	0	0
PA(14:0/20:3)	0	0	0	0	0	0	0	1580.825186	0	0	0	0	0	0	0	0	0	1566.454147	0	0	0	0	0	0	0	1049.522527	0	0	0	0	0
PA(14:0/20:4)	0	0	0	0	0	1447.633388	0	0	0	0	2444.020338	0	0	0	0	0	0	1048.268036	0	0	0	0	0	0	0	0	0	0	0	0	0
PA(14:0/20:5)	0	562.5928475	0	0	0	0	0	0	1462.088885	0	0	0	726.9446334	0	881.8220353	0	0	1118.823442	0	0	0	374.9746531	0	0	0	0	0	0	0	0	0
PA(14:0/22:4)	0	0	0	807.4888203	0	1053.241431	0	0	0	0	0	0	0	0	1051.592725	0	0	0	0	0	0	0	0	0	0	0	0	1401.911642	1430.650619	0	1051.958371
PA(14:0/22:5)	0	383.2852137	0	0	556.2021968	0	361.0500859	0	260.2442958	0	0	0	208.1206879	0	0	0	0	0	0	0	0	0	0	0	0	357.3976084	0	0	0	0	216.443496
PA(14:0/22:6)	0	0	0	0	0	0	0	0	0	0	0	1027.483842	973.2847311	0	0	0	0	1567.64402	1027.483842	0	0	0	0	0	0	0	0	0	0	0	0
PA(16:0/14:0)	0	0	0	0	0	0	0	0	0	0	1568.866945	0	0	0	0	0	0	0	0	0	0	0	0	0	0	0	0	0	0	0	0
PA(16:0/16:0)	0	0	0	1530.091687	0	0	0	1559.504873	0	0	1750.76792	2095.884823	0	0	0	1730.484271	0	2801.493679	2095.884823	1746.138451	0	0	0	0	967.9882684	1009.27045	0	1052.380485	0	0	0
PA(16:0/16:1)	1830.576422	0	1001.282546	0	0	0	0	0	0	981.5800678	0	0	0	0	0	0	0	1044.760088	0	0	0	0	0	0	971.3219237	0	0	0	0	0	0
PA(16:0/18:0)	0	0	0	0	0	0	0	0	1447.981276	1029.427585	1480.555784	0	0	0	0	0	0	0	0	0	0	0	0	0	0	0	1056.691567	1041.033464	0	0	0
PA(16:0/18:1)	1979.354668	0	0	0	0	0	0	2327.065085	0	0	0	0	1459.911088	2020.797209	854.5207965	0	863.6466158	0	0	0	0	0	0	3998.51595	1433.88613	0	1771.829926	1473.880805	0	872.891401	1476.719282
PA(16:0/18:2)	1047.380748	1008.325432	0	1049.410987	1009.364025	0	1566.933423	0	1529.573887	1471.344919	980.3454447	2673.057706	0	0	1516.844903	0	1009.856178	1268.731092	2673.057706	0	0	1043.149333	0	1518.218878	0	1548.726845	0	0	0	0	0
PA(16:0/18:3)	0	0	0	0	0	0	0	0	0	0	0	0	0	1576.057132	1286.857371	0	0	1086.200955	0	0	0	0	0	0	0	0	0	0	0	0	0
PA(16:0/20:1)	0	1472.808089	374.9730475	0	0	0	0	0	0	0	0	0	0	0	0	0	0	1085.178133	0	0	0	421.5070175	0	0	0	0	0	0	0	0	0
PA(16:0/20:2)	1592.976202	0	0	0	0	1578.333505	0	0	0	1030.875036	0	0	975.602682	0	0	0	0	0	0	0	0	0	0	0	0	0	0	0	0	0	1050.045613
PA(16:0/20:3)	0	0	0	0	0	0	0	0	0	1047.260035	0	0	0	0	0	0	0	0	0	0	0	0	0	0	0	0	0	0	0	0	0
PA(16:0/20:4)	0	0	829.3508473	0	707.1434413	0	0	755.3089028	936.3722568	1030.132308	0	0	0	0	1045.684344	1577.730238	0	0	0	0	1507.212323	0	0	0	1675.622151	868.8550547	0	1031.155524	0	0	1050.787894
PA(16:0/20:5)	0	0	0	0	0	0	0	0	0	0	1624.722234	0	0	0	0	0	0	0	0	0	0	0	1040.950374	0	0	0	0	0	0	0	0
PA(16:0/22:4)	0	0	0	0	0	0	0	0	0	1519.482699	1042.251913	0	0	0	949.4793683	0	0	1046.217561	0	0	0	0	0	0	0	0	0	0	0	0	0
PA(16:0/22:5)	0	0	0	0	0	0	0	0	0	0	0	0	0	0	0	0	0	0	0	0	0	0	0	0	0	1003.948918	0	1518.674655	0	0	1055.812852
PA(16:0/22:6)	0	2035.94492	0	0	2596.48272	0	1037.45828	0	1037.488165	0	0	0	0	0	0	0	1041.759713	1065.431957	0	1048.137447	0	0	0	0	0	0	0	0	0	0	0
PA(18:0/14:0)	444.3706304	0	748.1126784	0	0	0	1175.072346	0	0	0	695.4787726	0	0	0	1051.559706	0	0	0	0	0	0	0	0	0	0	0	0	0	0	0	0
PA(18:0/16:1)	1647.833063	6097.758224	2252.882008	2271.115328	2565.945257	5124.971508	2040.599962	3569.510277	2529.384512	2668.277558	5231.6444	1024.597458	0	2004.789309	2017.520549	8596.615602	1517.574274	1579.862057	1024.597458	3483.780943	2579.414544	1538.749378	0	1788.54717	3591.848456	1001.183844	0	2490.571356	0	7019.554242	2480.293437
PA(18:0/18:0)	2651.703913	7065.855457	3980.517132	4110.002427	3856.572973	2317.135604	1659.175821	2502.818233	1542.571274	0	1545.723139	1046.290508	1994.369684	1400.361252	3043.676291	2022.702123	1020.049281	2090.8404	1046.290508	3824.108138	1436.57869	0	0	4152.298598	4631.850379	2522.658271	3990.844441	3487.800719	0	5035.314914	1484.110015
PA(18:0/18:1)	119427.9594	226153.8166	76395.04532	126708.0488	126281.1113	101780.1146	76036.55412	78713.17716	75360.06688	55295.01809	113609.6296	51840.77599	38642.04421	75723.63748	127272.6495	194332.2349	32134.02305	75748.97169	51840.77599	88938.47658	95714.63179	67053.87824	16904.90074	88484.60285	188027.125	64582.29607	82861.88725	49404.47909	35819.23903	154173.1368	52109.39012
PA(18:0/18:2)	142168.9126	338615.58	86575.13798	177835.2738	204336.2507	60764.91405	126324.1726	39685.49285	102352.2499	97800.23104	73220.83883	233473.317	105287.5433	113619.3952	306471.2868	248615.5618	77522.72736	79126.40969	233473.317	162645.3982	161816.9181	90520.28778	60426.70363	171602.0025	138075.8417	215057.443	255448.8974	57715.12114	101901.1068	106545.9585	101473.5291
PA(18:0/18:3)	1467.894293	3063.759732	1543.77019	0	4120.337736	1520.38965	0	0	1543.116926	1030.132308	3137.759762	3140.279713	996.9230904	3851.702174	0	5063.625248	1027.983877	4195.580522	3140.279713	0	1013.917374	0	0	2525.446627	1491.503858	4114.745051	5490.476721	1495.096067	1565.848753	1513.899498	994.9642926
PA(18:0/20:0)	2611.925672	10746.25762	1540.181905	2416.975515	2669.568713	2529.255131	1928.88412	3049.560561	2585.255396	2951.890255	3656.933722	5006.070986	2034.819235	1000.08821	2400.923557	4435.13314	2064.0203	4314.937195	5006.070986	2011.302976	2568.271881	5176.006675	0	1604.024451	1522.717324	932.0338235	2067.373696	2551.923729	0	1011.090855	1362.880883
PA(18:0/20:1)	4735.288494	9421.323741	2576.913725	7078.685646	1033.000806	6671.806621	0	1526.987639	3055.240231	1791.074214	2614.280266	1567.769865	1013.449962	5580.783599	5654.065206	4627.665315	2589.41651	2520.861733	1567.769865	2410.758124	3535.055501	5167.957683	0	2053.546805	7226.106208	0	4529.052607	1006.028382	1006.223032	7663.338523	1001.797066
PA(18:0/20:2)	2661.913698	9760.263187	2585.014462	6724.074199	6048.813393	1563.227327	0	0	4130.255953	2543.560683	3136.046026	4698.248944	1684.668723	0	5122.212532	3558.896798	0	1593.471214	4698.248944	2424.271991	2017.955206	1029.993618	2570.315302	3071.905123	0	1439.092315	11050.83291	0	3552.82743	2537.150035	1997.981242
PA(18:0/20:3)	53866.23042	142254.2838	34202.92626	56918.72422	67834.84304	40364.97589	34963.02674	26144.93722	51757.37303	25253.1798	55041.06474	39707.31977	21987.46988	29942.8521	98561.57739	70835.19611	12847.58852	27662.82307	39707.31977	64264.94894	53641.56739	34710.7101	12442.79037	46822.22029	98921.27345	52325.07117	54354.12107	21161.58744	33722.97488	57569.1587	31377.38699
PA(18:0/20:4)	839429.7973	1621038.135	381206.2336	778014.5708	784621.2018	678875.882	469777.2702	460143.1008	600744.9273	249292.0391	788038.0967	366840.4729	297317.1287	474194.726	761246.7618	1063105.655	144185.4044	466321.226	366840.4729	620062.9997	531038.8116	343924.4246	126750.8472	642130.8063	1453060.361	498063.4113	673186.2615	321127.6731	331517.4688	883664.761	376056.2458
PA(18:0/20:5)	11454.81138	28643.9934	1554.119929	4098.80204	34253.4624	6232.882957	13483.59084	10869.03449	19427.2041	5163.434819	4162.743425	22921.77857	0	2582.295975	9760.794258	9362.260727	2083.172794	5213.85252	22921.77857	9712.822	8810.291455	4672.641964	1562.058723	9321.232946	6750.452062	5184.832277	17964.63035	2047.863034	4871.037064	6200.079538	4106.578701
PA(18:0/22:4)	196274.7157	406356.4478	142324.6717	297131.9291	85846.1655	297480.7959	90786.69792	215436.2319	104338.6358	62515.29976	320954.1286	37039.87247	52137.07679	132287.3412	111024.5977	327768.5993	15434.04748	65627.72922	37039.87247	122920.0793	227061.5751	75811.90458	19080.02711	153231.7574	488231.9836	137121.7759	107457.1391	84333.18655	63841.64496	345391.3218	103534.3531
PA(18:0/22:5)	125785.2855	221752.236	39981.96884	123218.3995	110492.8784	90333.73705	68807.60342	65603.85211	93048.77585	44741.64849	120086.8599	79814.47175	35436.61971	74850.52047	82370.85188	188456.9581	32288.60696	62636.47336	79814.47175	72797.26716	93249.19658	51726.48415	19255.60637	74507.59111	209934.7232	119409.312	87822.69094	29861.4126	48421.94104	144294.396	68102.70676
PA(18:0/22:6)	75513.10785	117990.194	50911.48993	64993.72045	111569.2206	46692.54334	52879.76529	47244.63137	72859.46693	40540.64674	48752.11326	62701.59809	19755.17128	54862.43632	61064.56387	78663.06919	23462.40668	65480.94941	62701.59809	56961.44803	40494.29215	49935.58042	10949.98325	67731.71245	76759.57109	44720.91821	81335.94702	39454.24152	25947.58924	45705.9918	28367.99406
PA(18:1/16:1)	1676.027553	0	0	2080.522359	1026.685963	0	0	1032.159009	0	0	0	0	0	0	0	0	0	0	0	0	0	0	1922.44097	0	1543.142283	0	0	0	0	0	0
PA(18:1/18:1)	2539.357673	1568.081245	1030.248872	1468.113585	1565.300589	0	2054.502121	1038.616597	3594.85079	0	3114.212247	0	0	2732.331093	1121.161441	1513.910618	0	0	0	657.1755087	988.4767389	0	0	2021.828562	0	999.3678351	1850.667207	0	1026.544164	1556.474923	0
PA(18:1/18:2)	1585.222819	3145.854006	1026.687441	0	1308.047867	1006.97763	2571.09752	0	5142.600382	958.7072516	0	1635.394331	1015.177375	0	0	2527.594167	0	2623.059003	1635.394331	2498.27852	1512.503617	1542.643507	0	0	3048.1779	2520.384979	2457.320792	1997.753134	0	0	0
PA(18:1/18:3)	0	0	0	0	0	0	0	0	0	0	0	0	0	0	0	0	0	1045.228302	0	0	0	0	0	0	382.2106276	0	0	0	0	0	0
PA(18:1/20:1)	0	0	0	0	0	0	0	1498.763306	0	1039.875425	0	0	0	0	0	0	0	0	0	0	0	0	0	0	0	0	0	0	0	0	0
PA(18:1/20:2)	0	0	0	0	0	0	0	0	0	0	0	0	0	0	0	0	0	0	0	0	0	0	0	0	0	0	0	0	0	0	0
PA(18:1/20:3)	0	0	0	0	1037.259431	0	1573.459548	0	0	0	1081.165825	1047.567451	0	0	1022.694453	0	0	0	1047.567451	1038.992988	0	0	0	1036.352653	0	0	0	1537.198422	0	0	1056.318723
PA(18:1/20:4)	9671.38631	8816.665334	1552.374625	2074.467465	3108.737208	3117.297671	5696.604496	3627.867232	4276.948538	2586.087539	2611.051155	2087.26909	0	0	5213.183523	2083.940973	3124.953506	0	2087.26909	7702.525212	4154.092319	2076.588789	1561.000068	6760.507314	3819.103615	0	7193.743343	0	2072.606582	1542.005269	1534.576717
PA(18:1/20:5)	0	0	0	0	1559.031474	0	0	0	0	0	0	0	0	0	0	0	1512.105455	1083.955477	0	0	0	0	0	0	0	0	1057.946092	0	1033.617545	992.0100818	0
PA(18:1/22:4)	3131.752425	2067.05128	0	0	0	0	0	0	0	0	1070.672737	0	0	0	1019.67331	1030.215247	0	1030.919486	0	0	2038.404226	0	0	1564.179911	1556.43662	0	1548.806009	0	0	1039.437164	2063.615831
PA(18:1/22:5)	1051.454702	0	0	0	0	1036.564919	4153.859122	0	1038.368449	0	0	0	0	0	0	0	0	1294.32141	0	0	0	0	0	0	0	0	0	0	0	0	1502.457211
PA(18:1/22:6)	1525.16685	0	1041.018031	0	1038.886861	943.4320889	3634.740642	0	0	987.5766199	0	0	0	0	1042.875315	3127.505478	0	0	0	0	0	0	0	0	0	0	0	0	0	0	0
PA(18:2/16:1)	0	0	0	0	0	0	390.2900317	0	0	0	1601.447026	0	0	1051.471473	0	0	0	0	0	0	0	259.125123	0	662.1507538	0	868.8660218	0	417.9791064	0	668.1517684	0
PA(18:2/18:2)	1093.236893	1536.58788	0	0	1036.604295	0	0	0	0	0	0	0	0	0	0	0	0	0	0	0	0	0	0	0	0	0	0	0	1041.630501	0	0
PA(18:2/18:3)	0	0	0	0	0	0	0	0	0	0	1085.236548	0	0	0	1037.336223	0	0	0	0	0	0	0	0	0	1464.34168	0	0	0	0	0	0
PA(18:2/20:1)	0	0	0	0	0	0	0	0	0	0	0	0	0	0	0	0	0	0	0	0	0	965.2975426	0	0	0	0	0	0	0	0	0
PA(18:2/20:2)	0	0	0	0	0	0	0	0	0	0	0	0	0	0	0	0	0	0	0	0	0	0	0	1198.20054	0	0	1531.134422	0	0	1013.191328	0
PA(18:2/20:3)	0	1064.701174	0	0	0	1020.083415	0	0	0	0	0	1018.645793	0	0	0	0	0	0	1018.645793	0	0	0	0	0	0	0	1027.756551	0	0	0	0
PA(18:2/20:4)	4704.068056	0	0	0	0	0	0	1039.883409	1030.124695	0	0	519.8085156	1030.090801	0	0	1561.417266	0	0	519.8085156	766.2761224	0	1374.320958	0	0	1550.353561	0	1023.551043	0	0	1511.293999	0
PA(18:2/20:5)	287.359233	0	0	0	0	0	0	0	1042.334458	549.3467724	0	397.9510064	0	0	0	0	0	0	397.9510064	0	0	1047.13043	0	0	0	0	0	1004.257932	0	0	0
PA(18:2/22:4)	0	0	0	0	0	0	0	0	0	0	2087.864444	0	0	0	0	0	0	1042.140173	0	0	0	0	0	0	0	0	0	0	0	1589.19429	0
PA(18:2/22:5)	0	0	0	0	0	0	0	0	0	1030.011535	0	0	0	0	0	0	0	0	0	0	0	0	0	0	0	0	1014.748398	1025.311407	0	0	0
PA(18:2/22:6)	0	0	0	1438.836272	0	0	0	0	2015.03998	0	0	1057.399501	0	0	0	0	0	0	1057.399501	0	0	0	0	0	0	1039.255616	0	1041.033464	0	0	1010.396983
PA(20:0/16:1)	3140.255259	14705.24623	4082.753746	8069.055395	4694.832022	16942.83633	2495.392902	11659.17474	4642.420884	1918.306329	15165.27846	2091.398921	2519.366339	6743.747424	16858.55497	13086.70204	0	1046.165264	2091.398921	2510.18038	8572.209238	1546.944031	1531.884599	5554.11849	12517.52024	3090.233141	2936.577182	2806.491014	3519.550617	7371.146526	3493.518919
PA(20:0/18:1)	88520.86969	180452.6737	74818.50632	87970.29499	121116.6882	67564.19655	75063.31253	61059.95793	60234.47752	31991.33734	79854.44782	58458.50522	42973.09176	59624.70885	117593.2415	171390.6325	20921.90981	37979.74946	58458.50522	75592.41276	144347.8989	59676.57333	10825.89799	82401.83624	128846.6817	94303.10231	136689.4854	35780.74902	30946.73517	106106.428	49565.42432
PA(20:0/18:2)	254175.2386	515576.4815	156843.7035	263234.0453	410970.2323	118257.6284	224585.0954	72234.42164	184449.2987	206186.9683	122070.7311	317940.7189	170498.1977	157906.1887	452152.7394	430880.6519	124195.5658	139602.0706	317940.7189	209900.1034	392498.7782	162597.0817	69918.04396	343313.789	248039.3242	277295.3184	338545.5113	96137.74025	149128.3938	196554.6182	191120.7465
PA(20:0/18:3)	2193.824468	7229.140975	0	2663.776135	4501.569365	3601.98251	1547.679007	0	2064.705684	0	1564.860234	4115.835625	0	3916.793631	2066.605065	9997.778961	2033.515261	7745.466853	4115.835625	2045.885648	6290.091712	1032.351479	1039.251404	5445.563902	3424.061311	4486.300354	7876.57223	3836.768466	1030.128146	2792.008365	2453.648703
PA(20:0/20:1)	942.9484244	10271.10208	1554.878665	3629.656025	2208.091949	0	1036.915789	0	0	0	2082.84725	2082.505094	1539.235313	0	3771.966786	4633.829955	938.4352827	1604.464006	2082.505094	1035.480949	3565.81158	4649.547999	0	2603.103801	3754.695905	1510.691002	2030.885499	0	0	1517.860309	1016.414959
PA(20:0/20:2)	3116.140937	2833.513685	0	3695.20532	1906.130596	1563.02088	2070.19298	2192.055882	0	0	4438.884196	4004.945321	0	1008.821583	1968.987321	6783.322966	2082.88927	1694.814058	4004.945321	2218.76808	3713.210156	2596.596677	0	4290.277934	1211.082237	5168.999858	2346.794517	1534.179849	3061.807889	4497.763781	2561.456949
PA(20:0/20:3)	98610.1686	193777.6727	34157.50126	75760.36774	93398.1131	70328.52303	64243.23256	57735.48741	84919.64256	33975.52086	80345.06188	66684.02437	39849.65152	45667.82808	129403.1256	104164.4962	15077.44876	58767.78012	66684.02437	78094.07885	77496.57493	56657.02043	11588.58998	83361.33191	112186.4682	60553.86789	84974.64252	31514.62561	40433.39966	92662.07829	50419.19991
PA(20:0/20:4)	1304835.996	2795821.544	817687.4954	1048526.055	1235071.231	1129287.815	920077.7372	824103.5663	1037930.929	360825.7288	1129489.976	499311.9982	499784.8031	962349.4863	1228103.295	1968093.105	234662.8495	802776.5005	499311.9982	1233499.986	1126315.078	520096.429	161911.406	1068064.796	2170243.475	810334.2582	1048379.114	487397.7169	449531.3082	1485590.695	706915.6657
PA(20:0/20:5)	37057.99754	69776.73062	5958.174983	11961.5617	78532.21083	19050.28131	28549.03558	16669.18404	48922.34646	20309.72522	9967.086892	35507.3687	3763.707627	8813.738648	11654.6455	37444.95327	10151.76509	15809.58159	35507.3687	15011.36206	37499.85417	8803.507897	3628.777416	27109.03397	21607.25217	10896.98641	39907.88889	8057.540617	13011.30791	17062.32914	14016.39244
PA(20:0/22:4)	223508.2474	447420.5253	158095.5125	224662.3671	61392.48185	303073.1851	70299.12952	173076.2415	55206.31449	30504.60674	248782.9161	25302.64102	36926.02279	165071.4738	128305.7628	345233.4286	26626.82765	78963.9047	25302.64102	148012.9676	193355.0946	81292.55061	14826.88499	146499.0844	517897.063	127157.9638	100216.3951	88473.10902	58861.12565	365719.0585	109128.8087
PA(20:0/22:5)	146372.5551	213654.8455	38042.6145	106717.0382	102988.6644	50488.59454	62188.12022	60413.42658	60009.91499	19630.77775	114220.7959	57845.46263	31523.48224	72366.30328	70644.31277	209039.4355	18252.83084	48408.4612	57845.46263	94407.14049	106287.1156	35004.39797	16178.19449	90859.91511	233716.9732	81837.53924	85380.9675	40812.03339	32248.52807	141414.4137	63637.31832
PA(20:0/22:6)	83979.82748	185789.1343	49740.85158	60037.72466	171601.019	64330.47952	67250.36839	50936.95633	86109.5844	44252.60425	62396.35526	70131.07451	14557.16158	63912.82676	67282.98242	134503.8578	28128.83509	79757.96695	70131.07451	84087.66049	54362.78464	50716.24918	8565.230188	72994.82556	109148.1278	36365.56664	98121.63042	29303.53934	42168.88868	61686.84262	41462.55499
PG(14:0/14:0)	0	0	851.5443888	0	0	0	0	0	329.4879414	0	0	552.8947269	0	0	0	0	0	328.5036372	552.8947269	0	0	0	0	0	423.353375	0	394.4195961	269.3610023	0	0	0
PG(14:0/18:1)	2279.8728	550.7651047	797.6064751	879.4386283	1064.37815	1100.056681	1258.358038	836.6914918	1820.67703	0	837.2307349	2813.299786	404.4220437	1376.506229	1387.492801	274.7480498	0	1420.955536	2813.299786	1899.051129	898.6936134	749.9289724	0	881.813023	1062.35313	0	675.6002525	0	834.0242868	282.2100205	548.9358981
PG(14:0/18:2)	1604.734198	847.388164	0	514.3230879	368.9072175	697.2798186	902.6355866	553.625	633.1578564	786.5369009	1199.020055	1514.022076	771.8539959	544.8721773	1577.944363	2090.482788	691.801323	1274.574594	1514.022076	899.3274641	1102.961544	0	391.5143136	675.0344466	1044.752084	479.6221726	1527.835067	390.1085534	660.2420141	984.3996417	0
PG(14:0/18:3)	0	0	0	0	0	529.0196435	510.82549	0	0	0	0	494.6218608	0	517.7412016	0	0	403.1135191	0	494.6218608	0	0	0	544.1701383	0	0	0	269.3835064	422.5658554	406.1098591	274.3095111	344.6918084
PG(14:0/20:1)	0	0	0	0	0	0	0	0	0	0	0	806.1200693	278.0920213	0	0	0	0	0	806.1200693	0	0	368.0362357	0	0	370.2862976	0	0	583.3098547	0	320.3562415	0
PG(14:0/20:2)	0	831.2806164	0	910.812292	0	273.194148	0	0	0	0	397.7366233	0	0	267.6654324	0	0	0	0	0	0	260.6099826	0	0	0	0	0	0	415.5164037	0	0	0
PG(14:0/20:3)	0	418.3227282	0	534.5965873	535.4727559	421.3785756	0	0	0	381.0405078	0	1301.457677	0	544.3049863	419.2209745	421.6656787	0	0	1301.457677	0	260.0878302	0	0	278.9019758	383.7062588	0	382.5221615	0	0	408.2031544	0
PG(14:0/20:4)	1630.422225	4013.661457	1012.936769	622.0505386	2250.092507	1107.0559	1220.182132	833.6400556	1746.117216	0	1960.266696	684.5820611	1087.256487	1673.333492	1372.810912	1264.735384	421.8836473	465.2646486	684.5820611	2797.76549	1390.506862	758.5407871	280.0689819	1973.967883	2763.999239	1525.873065	1738.579025	0	263.700375	767.3218735	1642.318083
PG(14:0/20:5)	0	0	502.017592	0	401.1229382	403.1793074	0	0	669.9999146	534.0210768	0	0	283.3235405	0	0	0	0	0	0	421.8462675	0	0	0	536.1331569	639.7557387	0	420.5077514	262.1819431	0	0	270.7223324
PG(14:0/22:4)	789.6051338	750.710143	495.0787461	0	495.671429	499.181806	0	676.5017266	499.0159695	0	648.2566722	500.4756723	0	839.8592016	0	637.9729709	0	0	500.4756723	518.2012049	0	0	0	0	1476.215812	0	407.7951778	280.6154343	0	699.5351905	822.6085931
PG(14:0/22:5)	0	627.4817043	1013.132713	0	687.1690454	0	0	0	592.7001397	0	0	0	0	0	864.3467753	879.1600752	0	0	0	977.8181529	0	0	0	642.5802728	882.1128973	1064.146637	948.7430921	0	559.9156775	555.6643034	684.0770164
PG(14:0/22:6)	746.5166223	418.334344	0	403.0791844	938.6667008	279.2075063	795.0747581	419.4103938	674.4684624	666.8222959	822.7341091	552.7298837	530.2996194	415.6080434	0	699.7155018	415.758599	0	552.7298837	1756.515439	972.2856073	0	0	0	402.9107408	402.5175754	268.2117056	310.5913145	558.1274086	0	562.6883219
PG(16:0/14:0)	1335.225114	1353.05661	643.3206115	384.899793	1021.21347	3142.081303	10070.33674	1226.631284	776.3740678	487.0394952	746.5191599	5790.071539	509.8665599	0	962.3338664	1103.989766	0	1533.675251	5790.071539	1958.251741	820.2161923	515.4438577	0	0	1930.561664	0	655.700175	0	1574.703827	685.6418618	388.1345515
PG(16:0/16:0)	14886.57935	15912.99106	16566.95158	14084.74774	8184.253689	22749.94655	47647.18412	4231.81678	10214.17638	3229.282079	10233.04303	19143.65916	2101.386133	6513.648956	9335.960301	12179.42641	1461.244734	6340.298386	19143.65916	9253.201057	6255.331224	12589.96418	1121.635552	6035.032025	16501.41987	6382.452265	4649.533621	10763.02121	10182.47216	19478.48665	6973.023626
PG(16:0/16:1)	3815.672606	6243.491851	5443.773881	2393.331281	2392.322041	14221.23439	31579.77672	4898.43933	3581.922505	1455.40964	6439.201017	11427.81961	2038.201664	1806.395538	4619.255524	2773.458521	0	2003.08654	11427.81961	4750.992453	1534.479246	2394.492154	276.8420589	1397.901286	2129.612399	0	815.8760209	4933.045477	12003.82941	3863.603903	2180.607905
PG(16:0/18:0)	6931.458798	12452.63644	5808.99102	11412.39869	6486.891571	8506.231118	11144.12208	4605.462186	8415.225409	3413.991345	6357.835492	11905.33313	2060.846683	3685.408273	8014.131653	8093.976126	560.7959919	3206.52588	11905.33313	6146.457063	7522.347687	6194.698835	285.1393446	4350.478071	9627.971865	6365.094055	3515.66957	2766.671878	3344.523056	7635.143673	8543.020039
PG(16:0/18:1)	110533.5869	216817.9279	147441.3178	124503.6503	108999.919	148605.5629	268784.848	152714.8999	220461.6638	88833.18303	194148.6289	263207.4132	49828.98823	82146.19889	187737.5646	182257.736	22693.48077	133453.441	263207.4132	121005.2304	84465.16535	148692.6135	10747.86297	84957.21841	143444.768	86245.88398	84304.44188	101762.7497	70120.0589	136377.2718	81460.55432
PG(16:0/18:2)	40686.68323	52297.56797	47037.15018	44670.30192	31662.64417	56504.44954	72868.95339	31942.83337	51693.35746	25077.42772	41406.65797	80523.84259	23502.76442	28031.92276	39063.48711	44046.45804	5992.023594	30098.83606	80523.84259	33472.70802	19566.76611	26298.56151	3766.088251	33994.29037	42937.78515	38306.65651	25464.37632	49686.41301	36715.73641	42668.42273	22446.38043
PG(16:0/18:3)	935.6368357	1391.658655	1202.615214	1464.240157	2137.405644	1421.559039	3330.143676	696.0625	2269.693344	374.950882	708.7094324	1297.4508	0	0	556.9354444	821.4804367	393.8178841	2945.846555	1297.4508	558.1307049	562.0421871	399.3068006	0	984.0871677	928.5102138	1056.422273	531.2949906	842.3824686	555.8188963	540.7123358	558.8328458
PG(16:0/20:1)	2596.413064	4032.323155	1599.792012	1872.756184	535.7325113	697.7685123	5880.659802	699.0054688	2140.186049	0	1172.686972	2609.7087	939.8480875	819.0493696	1398.310182	1664.645674	278.6889222	1564.139591	2609.7087	695.7117422	1531.620873	2671.147463	419.2774198	0	2271.38335	667.7239236	1529.918476	475.1313499	586.9886542	943.4645967	1609.512991
PG(16:0/20:2)	22826.10041	24196.70115	10668.44869	13094.98031	12401.90282	10071.57736	42546.80658	8523.554248	18331.71199	5616.818526	19109.26811	36016.0821	7440.583698	7644.392575	17798.23276	18066.55369	3076.145789	16304.02957	36016.0821	11796.06292	10435.92044	16878.63561	1536.461372	9998.447491	23967.40578	17347.51517	9462.282228	6945.028815	7538.663463	20144.29196	10165.91619
PG(16:0/20:3)	4513.819576	6233.372428	1731.276371	6789.005448	4877.625182	3450.627431	5181.314349	1259.597789	5778.489284	1432.860702	5661.584186	11620.11597	1522.229998	1817.990281	4001.049719	4177.06015	270.7242573	11612.30567	11620.11597	1465.750201	1743.717407	3337.356255	277.0050092	1682.034558	4093.251407	5103.013564	2935.492365	1945.407957	558.9863916	5598.944306	3232.192805
PG(16:0/20:4)	17937.83281	19113.83129	5640.48334	13329.69126	9102.425169	13627.16401	15781.03973	5250.313572	9659.287162	8170.939302	9528.490376	24539.15768	6355.114864	6713.912401	15183.17523	13859.5603	679.9887381	11350.7485	24539.15768	12339.93468	12526.02822	6404.561325	1359.514607	4818.698903	6861.069305	24949.8344	10424.38118	8802.121562	4688.167396	18315.56318	15691.28402
PG(16:0/20:5)	667.9758937	0	933.7095728	0	1328.525308	543.28397	1067.325355	0	0	0	0	1333.124554	265.7865879	0	513.2475787	282.0672557	0	661.9402163	1333.124554	1204.957461	404.9232861	0	0	411.6432424	0	0	0	418.3533604	396.173474	416.4032483	0
PG(16:0/22:4)	1321.10658	549.4801441	401.0299138	1068.188288	0	689.4195025	0	1242.954218	801.8527839	0	406.764773	0	0	550.5117329	682.8867061	263.4981364	265.3059891	661.0503243	0	784.9057699	274.1653296	0	0	0	1056.864815	0	799.4080731	536.9305842	265.6360017	1391.122943	393.0538358
PG(16:0/22:5)	1190.565706	1648.444029	0	807.2495501	1205.879898	405.0641839	1046.369213	0	804.1139716	0	817.7345378	1047.09119	0	409.1382543	274.8811017	834.2564492	391.8146611	1451.639031	1047.09119	1139.600997	680.652472	536.1428544	0	693.4322408	648.1968982	402	903.6103756	0	491.433369	692.666874	527.6332148
PG(16:0/22:6)	1383.638604	828.045831	725.7402099	0	1813.453402	273.9590491	718.6175521	687.0306447	1209.361592	658.3377151	811.2974056	492.5607615	397.8169524	1146.531326	687.3272204	886.8699819	275.8455219	978.1636106	492.5607615	1663.753084	645.8691013	1330.887484	0	550.2316029	0	1306.527102	504.8674014	404.3004064	758.2132548	891.0541106	1004.850255
PG(18:0/14:0)	918.1423604	838.782741	0	611.3834032	604.608	700.7836196	1333.237024	282.2727429	0	366.8976404	0	2867.846102	0	0	977.4670235	552.982216	0	0	2867.846102	0	0	845.9682578	0	980.5622413	0	482.5035049	265.9465295	0	929.4799	823.8454018	0
PG(18:0/16:1)	2738.323765	2117.678766	1739.476614	4140.698557	1069.78197	6593.534231	11988.27915	3558.024132	396.6171271	1201.206435	3000.063517	3839.391424	0	1092.162214	1792.066007	978.746564	566.1182457	1958.446723	3839.391424	681.9139355	1809.918856	1872.320653	418.4106429	418.9940712	2140.161959	1194.468066	0	1518.297854	3291.591728	2510.084034	1926.690398
PG(18:0/18:0)	4867.92688	9032.384525	1475.597837	4334.344683	4651.979312	6582.145176	6540.980759	8216.271153	5270.07605	2654.560397	7700.908423	8804.752527	1252.215434	4995.645048	5042.488475	7019.126288	655.6404887	4512.634861	8804.752527	1932.905335	5442.716012	2986.691605	276.4733492	5286.461326	4049.821926	992.9018578	3674.707216	2919.392407	1110.638447	3608.93942	3871.288795
PG(18:0/18:1)	102003.9523	187766.1397	68806.97948	92458.85943	67537.77917	72627.3565	78185.20288	151208.0682	108070.883	66106.46328	164360.356	220110.05	33193.73263	60064.42434	87755.65251	119521.8604	11169.43341	78197.36525	220110.05	88773.31894	70663.8779	90166.96932	6710.295037	59149.44276	89253.69934	40653.89063	38056.06771	74153.2526	37021.19823	84611.21478	77291.49732
PG(18:0/18:2)	95945.65217	132059.8349	46274.74375	94448.46039	55326.94401	54886.78958	128313.3718	81545.69363	96189.15568	56631.55191	110647.4276	152739.8927	36629.46608	51748.41251	96046.3939	112253.0849	9825.546465	79193.85901	152739.8927	56843.51723	53759.84815	61968.35568	6664.102659	63705.81824	80193.81831	53109.21097	44907.47123	81124.69573	49801.93445	57691.07607	82202.17399
PG(18:0/18:3)	959.3005109	974.3493282	0	1094.627973	970.730855	836.1996382	3434.568157	699.0739024	845.2874179	365.1539027	971.0153694	1090.93084	0	414.4513527	978.2225839	699.8460835	280.1157818	2554.944428	1090.93084	790.3649653	837.6530025	602.8921713	0	418.9565773	0	2674.228375	395.9764803	271.8300581	266.9422175	1119.875582	1492.128698
PG(18:0/20:0)	1622.235011	1326.176508	454.9331505	768.4411479	1106.414679	502.4178448	1125.643192	1881.580051	1119.763493	591.5682656	867.296689	1610.657783	558.1471894	1578.653023	1244.415033	1250.525337	0	1818.094356	1610.657783	2022.245848	1259.808735	1341.997633	626.7703222	599.5568315	740.4974933	762.4631572	1948.353734	1244.581936	0	1139.950202	694.6442212
PG(18:0/20:1)	1287.604943	2356.618728	535.5542898	1473.472389	1071.305115	832.0011475	1606.927862	834.2137622	0	0	1902.588559	3599.936847	277.5695073	275.0476586	972.3888768	2502.234433	278.6649334	1003.749121	3599.936847	1068.963476	692.7788604	1091.160905	0	1823.340958	0	0	940.4744371	832.6537552	684.6204582	971.345681	1087.654503
PG(18:0/20:2)	19112.27807	20478.68094	5300.46542	15750.93111	3627.422124	5126.204513	11484.50931	9554.667158	7636.365381	3622.330304	16832.12257	31618.13989	6275.258437	7084.195585	11792.27145	8861.693995	2088.062371	11841.55848	31618.13989	9077.452938	7067.266034	14623.43778	970.848116	7759.029108	11871.64063	6592.901258	6322.214502	8892.278739	5880.508761	10052.08275	9145.596827
PG(18:0/20:3)	9662.341641	9866.799699	1739.996137	7351.562177	3906.183319	3293.878456	9623.194992	6593.189607	3896.092323	1173.561978	2909.748591	7465.910797	968.9007803	2432.357126	3984.24572	4201.174117	278.1491249	6684.505482	7465.910797	1206.624725	2321.553802	2142.345323	692.850373	2346.054733	3735.664261	2007.322198	1016.466354	1783.034386	1997.959894	1799.716907	1880.686586
PG(18:0/20:4)	16642.62598	32516.67695	7846.896535	42995.11581	10081.25211	14124.00321	9420.317655	9396.75129	6254.720022	3800.109531	15611.14657	13373.64354	5472.217436	8627.797887	12389.96148	21623.13128	524.8350629	10308.13334	13373.64354	10482.16666	13142.58093	4006.567044	1052.413335	9080.818439	24049.04252	9234.522696	11825.16233	7235.329963	2634.631386	19684.07468	12582.76983
PG(18:0/20:5)	817.5411022	646.7258864	383.6158039	0	0	386.8862622	0	0	0	476.8798902	503.8218063	0	0	423.4206393	0	0	0	0	0	0	501.4545474	0	0	0	0	0	0	661.8068611	0	0	277.0744779
PG(18:0/22:4)	509.8294262	652.3147961	0	1157.787405	0	519.7908144	643.2	392.3082871	0	0	0	0	521.4379079	0	0	1688.542423	785.5685808	514.8856713	0	581.9099422	1044.994103	444.4621452	0	0	2058.092813	389.3752918	270.6557018	259.0754417	0	1317.280226	266.4255143
PG(18:0/22:5)	1106.562174	1057.968559	0	1178.043806	639.7994908	0	653.9199016	930.3613301	0	0	1042.527934	0	0	270.52487	400.0484228	796.0743014	0	1416.689688	0	392.8841639	397.4124652	0	0	666.7866675	368.3319392	0	0	794.7323052	262.7666528	1078.419083	378.7349565
PG(18:0/22:6)	413.0443318	0	0	664.3857946	1295.639552	0	0	443.1382215	496.2683724	0	1752.081596	537.5522984	0	0	0	876.3523035	0	1208.311729	537.5522984	0	0	0	0	469.6269268	0	0	832.167129	0	0	0	0
PG(18:1/16:1)	2276.42173	5020.327818	3796.915101	4704.311475	4723.647939	2634.301571	3086.28138	2973.706878	3407.087635	1685.861991	7162.953811	4407.639621	2428.982553	3614.419759	3789.155001	6394.550065	1844.520142	2973.498465	4407.639621	4384.242245	4107.999553	1807.064808	562.9442069	1947.174939	4367.470018	2802.407964	6307.330908	2090.711337	1595.571743	6132.88348	5820.266122
PG(18:1/18:1)	18510.56792	18892.89901	16054.15795	34280.68662	13719.43933	25241.9506	16775.58361	26760.22472	14214.80313	12825.65782	26099.07343	25434.54517	8440.813706	7680.936298	30538.77036	18825.51731	4145.064098	12985.64361	25434.54517	20332.04398	15418.83973	17128.2934	964.4112763	13886.85598	29566.45578	13382.15378	7136.334062	12399.12271	6603.011347	24383.7159	14734.63323
PG(18:1/18:2)	170521.8917	27124.4315	36678.00981	77562.89992	13057.434	39612.51367	59147.62521	23558.42061	24904.28117	170384.7755	90255.71058	37127.11041	30230.88661	32776.26878	65061.08311	102791.0842	17326.89032	44028.89044	37127.11041	92122.93981	24397.16376	26735.57974	2232.226341	17494.36485	72469.62047	19043.73143	73934.46194	44144.10772	11093.26666	106963.0508	53865.21092
PG(18:1/18:3)	0	1250.672067	0	1606.852329	669.7260677	610.7907079	0	1110.295103	401.6067202	0	0	1331.561028	0	0	977.5202949	1663.036087	0	850.6185135	1331.561028	3088.901589	424.6909353	405.7465329	0	972.2735158	0	0	2174.058998	1734.948498	0	697.3177744	1153.935782
PG(18:1/20:1)	394.3359704	1198.408033	389.8502549	0	652.3092593	798.8169884	0	0	0	0	398.0577946	0	0	0	0	0	0	0	0	0	406.1029675	391.1879194	0	0	391.28	0	268.0485927	0	0	404.5678286	378.0361835
PG(18:1/20:2)	795.739519	1809.229889	1473.937736	804.784196	536.3310157	700.021578	1340.767582	977.5004327	670.536	0	1450.56821	392.6778459	394.9948988	0	419.1401449	836.6012233	0	1847.637265	392.6778459	799.4525726	423.9336505	536.5070467	0	973.6585916	666.4850456	0	396.6868998	812.7113988	0	415.2106018	0
PG(18:1/20:3)	1090.932718	1524.228453	399.2334093	2815.754135	385.6136518	945.3584415	1836.02716	666.9430669	789.6765694	0	1372.872623	966.1183059	258.055781	690.9563835	1364.226949	1361.751239	0	803.5230816	966.1183059	385.9794821	542.6097837	528.5944996	0	1096.811393	2126.651043	797.1922148	1805.317313	564.468911	0	690.7427849	1017.851016
PG(18:1/20:4)	4905.596819	7641.669444	3704.423033	11456.68553	3424.526232	5581.161385	2886.252774	5621.547588	4356.645974	3240.863068	6293.8345	6627.423702	2418.804226	3280.960949	5082.791665	8732.784924	518.9406507	4806.116557	6627.423702	4073.277831	5367.666998	1495.372194	0	3096.502494	8902.271816	5909.618303	3495.495364	2266.743128	497.6669423	7405.517111	4662.358914
PG(18:1/20:5)	675.4865437	407.6558585	0	395.031387	0	413.9520339	0	383.5879497	0	0	0	0	254.6640869	411.7989523	273.9855241	681.6604243	279.488395	0	0	0	0	0	0	646.0929805	0	0	501.9397367	0	0	268.2367578	0
PG(18:1/22:4)	496.8159245	1378.911454	505.6154721	400.0769532	0	557.2662881	0	553.4267947	0	400.5781027	815.3884999	0	0	831.4052861	968.7689462	1357.938397	0	0	0	391.7803837	276.6298041	0	0	415.6124385	869.7345108	0	765.6701122	381.1742271	0	1089.195877	995.5167049
PG(18:1/22:5)	994.5951712	992.760428	0	0	0	754.6949766	430.6012247	0	987.5450068	0	407.4992984	815.1501277	0	673.7408352	1208.750851	0	0	0	815.1501277	520.1791619	535.7009425	0	0	0	673.658347	0	0	0	0	565.3190354	252.2053997
PG(18:1/22:6)	1000.264851	1659.045039	587.0841987	828.9166538	1051.590713	594.2960206	0	0	990.3965919	0	0	943.5536877	0	0	1201.364474	0	0	1059.590907	943.5536877	256.2024327	579.653072	471.2217954	0	588.2504969	1310.320955	710.0634783	861.1752798	614.3855496	0	0	382.7947246
PG(18:2/16:1)	7607.170302	8914.838465	6528.774275	7447.817709	10107.30015	2424.218006	8113.903162	7991.719121	5986.334059	3220.841673	9441.491455	11765.39067	4750.720963	4969.276523	5772.763837	6941.454109	4153.85941	8851.861348	11765.39067	3254.850217	7893.41979	6273.06405	820.6760207	5744.67638	4922.954078	7281.68292	5598.864669	6381.284992	3124.818411	7228.317216	7279.404188
PG(18:2/18:2)	20405.75243	27670.84738	7519.460163	20846.76808	10352.05322	6723.966468	6257.39347	12710.46763	8453.542383	5109.424637	20103.6699	8941.331257	6588.441568	9990.419978	8912.073518	29045.98918	2090.331503	9457.973172	8941.331257	7048.372704	15180.24633	3000.686423	0	12565.94368	28287.1529	13746.86153	13583.97324	5741.283575	4664.593229	23551.48173	6044.032241
PG(18:2/18:3)	3624.220499	1904.076397	704.2133309	2241.524306	2483.40119	1100.685812	1401.469711	0	1035.636788	897.2766831	1746.182964	1195.224268	875.8948846	2363.585308	1176.438033	2222.934896	0	2982.094997	1195.224268	1909.965679	1032.623903	0	0	0	2634.549551	1149.292715	2575.186522	0	0	647.2275977	1394.910411
PG(18:2/20:1)	380.262867	0	0	0	0	0	0	0	0	0	401.3627907	528.3129686	270.5887642	0	0	267.9510679	0	374.085646	528.3129686	422.8677234	0	0	0	0	0	0	403.753135	0	535.3474618	256.6368245	0
PG(18:2/20:2)	4076.762909	2438.607354	750.6830738	1336.659061	1238.471541	1612.84124	800.1723067	1099.660963	1719.309891	3434.840998	2804.168856	2206.540842	0	0	1927.682761	3294.658409	0	3003.118638	2206.540842	1809.667215	1447.875752	1808.890373	0	1384.693609	5490.738488	1372.719887	2671.315904	1731.342207	0	5816.990949	1154.623244
PG(18:2/20:3)	1833.611494	1634.526144	0	865.4096866	767.6224277	0	494.3035635	631.3017239	448.9173232	0	1888.453578	776.7135524	0	374.5082699	840.8189627	361.285241	0	0	776.7135524	458.9011154	357.6610615	1435.80568	480.8963873	0	0	927.0264736	713.9541375	375.3495751	0	762.8185997	876.9626792
PG(18:2/20:4)	4728.011938	2894.885042	1944.227088	5808.475437	5414.685517	2506.483397	2551.895637	2050.12429	2189.144263	2534.847799	4947.646456	2983.774869	988.0099198	2995.24223	2130.496362	3045.273066	804.0132488	1953.666873	2983.774869	2728.677324	1404.392003	2045.147216	0	2530.234405	2580.747809	3400.258991	3314.972302	2830.624734	2202.468528	7100.173765	4164.345341
PG(18:2/20:5)	503.9154662	0	532.0372586	534.392	396.3718782	0	0	0	717.630999	0	502.1105111	516.3535194	0	0	0	0	0	510.6214833	516.3535194	0	0	557.7319804	0	0	528.7109049	539.1399048	668.2967935	396.590595	0	812.2585523	384.8274056
PG(18:2/22:4)	640.5445812	0	0	0	365.6766299	370.2930434	367.16	614.3015606	0	0	919.3807513	485.8529456	0	0	0	489.1060608	0	0	485.8529456	396.1560696	362.3283714	0	0	616.6608641	0	0	0	252.987928	0	503.5866716	378.8493889
PG(18:2/22:5)	371.5298525	0	0	0	0	0	0	0	0	0	0	371.0209533	390.7855527	0	0	392.8997811	0	528.639865	371.0209533	396.632535	0	353.4780406	0	0	0	476.290484	0	0	0	387.1889017	384.3712012
PG(18:2/22:6)	770.3167402	659.2703815	0	651.7689181	527.3107888	465.252004	0	623.0733294	0	0	375.0910022	512.3277659	0	0	0	914.0303901	0	515.0086506	512.3277659	402.610187	658.7020358	510.3073985	0	0	1171.417277	0	0	277.2922471	0	0	518.0902765
PG(20:0/16:1)	0	0	0	0	0	0	0	0	0	0	0	282.3677713	0	0	0	0	0	0	282.3677713	0	0	0	0	0	0	0	0	260.2471184	0	0	0
PG(20:0/18:1)	2255.544677	0	1020.216501	516.9604288	0	0	0	0	519.9933933	0	1333.821354	1369.460566	417.0950161	0	636.8822783	454.4769786	573.1148827	1181.654346	1369.460566	667.2011371	0	1161.780928	0	0	1612.975722	0	672.2407695	393.9646607	415.0765499	1573.208987	962.6380952
PG(20:0/18:2)	1707.636192	0	671.3468125	624.0697055	0	0	0	0	1145.705206	1053.71533	645.5914152	1504.112456	583.9977954	0	0	0	0	1236.238333	1504.112456	768.4073732	1177.888148	0	0	0	1785.609866	964.4664573	1039.244452	874.1132634	401.7561647	0	1551.384555
PG(20:0/18:3)	0	0	0	0	0	0	0	0	0	0	0	477.40364	0	0	0	0	0	0	477.40364	0	0	0	0	0	0	0	269.6354091	0	0	0	0
PG(20:0/20:1)	0	0	0	0	0	0	0	0	0	0	0	0	0	0	0	0	0	0	0	0	0	0	0	0	0	0	0	0	0	0	0
PG(20:0/20:2)	0	0	0	0	0	0	0	0	0	0	0	0	0	0	0	0	0	0	0	0	0	0	0	0	492.2424935	0	0	393.2342601	0	0	0
PG(20:0/20:3)	0	358.3292163	0	0	0	876.1571913	729.8261287	0	0	366.624	0	369.2706426	0	0	0	0	0	0	369.2706426	0	0	0	0	0	0	0	0	0	0	0	259.0398284
PG(20:0/20:4)	1045.766817	808.4395708	802.1548699	600.4153977	563.6749284	598.5986705	0	502.9770512	690.4781657	0	1316.74494	763.1073604	252.1777781	1455.414846	0	787.3911039	0	1151.598936	763.1073604	814.6855456	805.8247103	898.6709324	0	773.5545884	1645.322752	1293.50212	1120.924707	873.3460151	0	1204.168258	514.0087422
PG(20:0/20:5)	403.2006064	0	0	0	0	0	0	0	0	0	528.7979684	792.0779171	0	0	0	0	0	0	792.0779171	0	0	0	0	0	396.9004918	0	0	0	0	0	0
PG(20:0/22:4)	0	0	0	0	0	0	0	0	0	0	0	0	0	0	0	0	0	0	0	0	0	374.8259479	0	0	0	383.9377764	0	0	0	0	0
PG(20:0/22:5)	0	272.084312	0	0	0	271.0389784	0	0	0	0	328.9424307	0	406.8375965	0	0	0	0	0	0	0	0	0	0	271.1179762	0	0	0	0	0	0	0
PG(20:0/22:6)	330.6744333	0	0	0	0	0	0	0	0	0	560.9605954	661.4763303	0	0	0	0	0	0	661.4763303	0	0	0	0	0	0	0	0	301.5473159	0	0	256.6444105
PI(14:0/14:0)	578.2686356	0	0	1116.01165	549.378189	0	0	0	0	0	0	0	0	0	509.7187181	0	0	749.5370201	0	0	0	529.3761403	0	0	0	0	0	0	0	0	0
PI(14:0/18:1)	2674.80251	5753.592087	3091.167359	5675.44543	4553.329251	7652.828974	4545.080961	3090.811964	4369.828937	3471.988686	3988.872881	6017.093327	1467.293451	4376.601714	5168.486157	2910.849032	2015.404435	1951.151228	6017.093327	7328.701406	4678.566807	3102.439059	0	3324.896557	4128.768576	2619.780536	4067.264625	747.0327568	1173.039182	2776.255387	2650.477414
PI(14:0/18:2)	6929.099146	11650.58282	4380.499391	13460.72796	10888.90751	6517.642712	1943.45078	2933.117758	11381.07308	6860.613015	11504.52885	17190.08742	2348.102289	9961.076955	15190.32902	11603.2006	3761.969582	11173.201	17190.08742	13668.27272	12984.21703	6773.596508	1132.243132	12425.07019	6908.93949	12080.97285	7745.722329	10474.41494	4738.44406	10404.51423	9041.637012
PI(14:0/18:3)	0	0	0	0	554.6182512	0	0	0	0	0	0	300.0031554	0	757.7673879	0	199.6589307	0	595.3696403	300.0031554	395.4708973	0	0	0	0	0	790.8561308	0	368.9271015	0	0	0
PI(14:0/20:1)	1056.240119	0	0	0	0	0	0	0	549.9415235	0	0	2015.537159	0	0	0	0	0	0	2015.537159	0	0	0	0	0	0	0	318.1045027	0	0	0	0
PI(14:0/20:2)	1009.925411	0	0	0	0	1161.298541	0	444.5432325	0	0	494.2053059	522.0779373	0	0	850.9809649	511.6674647	0	0	522.0779373	784.2071791	0	0	0	0	570.9892127	0	822.7942657	255.7299075	0	0	549.329538
PI(14:0/20:3)	3793.242722	1645.154192	4240.826459	2083.222308	2696.357637	2837.800142	1135.96332	599.1210907	3355.394935	2446.252587	4057.621109	4721.390422	4119.194984	3464.381439	1642.115665	2101.532562	973.9478958	5220.827956	4721.390422	1970.466809	3041.641201	3508.889558	1142.903114	1460.210698	4044.59154	1280.741328	2367.702332	2868.044016	3002.710004	2476.737681	1423.249601
PI(14:0/20:4)	9732.110496	6722.369562	7248.594916	6397.855059	6639.89225	6969.576178	5246.320027	8397.361932	7627.563868	4256.431333	12492.82727	6878.830878	1436.914563	6537.55658	8816.45954	10520.0483	1899.486888	4667.656792	6878.830878	8658.215987	8942.19104	1510.87406	0	7537.098116	5575.476514	7331.589796	7082.956188	7508.749874	580.9372803	8239.738093	4313.791212
PI(14:0/20:5)	1513.121924	555.1308107	0	0	1737.026307	2838.166221	0	1956.807325	2183.412332	0	448.5464911	906.542453	0	550.8901548	547.4548878	1104.019092	0	270.3618154	906.542453	0	1431.139965	586.7054987	0	540.4323129	878.7311298	0	2015.650987	0	849.392136	1422.484285	1157.579986
PI(14:0/22:4)	2120.002329	0	0	860.7287097	585.0448666	1694.858477	0	0	1173.82957	0	2389.684779	0	1146.095947	2271.400165	0	1093.863829	1642.415239	1196.193578	0	2019.790645	1127.990005	0	0	1076.90567	1203.406259	3553.609025	1158.791098	575.6095961	576.261824	1707.180553	577.5704998
PI(14:0/22:5)	1207.199425	1664.003612	0	2034.746918	1103.146854	1300.56982	722.2874612	574.1851071	1742.840267	0	1492.873501	902.0505602	0	1422.092734	0	1920.875032	807.9500924	1803.847612	902.0505602	3181.060854	856.4542934	0	0	689.9909086	1316.567423	1164.51184	869.4433502	868.9040189	0	836.5408675	1149.023364
PI(14:0/22:6)	2728.139187	0	0	1365.954156	1100.256244	0	0	0	548.8919831	0	1185.578233	2671.588462	0	0	567.0797208	0	555.274513	1185.785941	2671.588462	0	1268.320953	0	0	0	0	0	0	708.0654268	0	0	0
PI(16:0/14:0)	604.9782237	0	0	0	0	0	0	0	0	0	616.4287634	711.4221241	0	0	594.0928047	0	0	1096.098162	711.4221241	0	0	0	0	0	0	0	0	0	0	0	0
PI(16:0/16:0)	3734.38753	0	0	333.1461702	0	512.7002744	1880.313357	0	0	0	0	0	0	884.0639704	0	1512.874048	0	0	0	909.4526642	934.3363489	0	0	0	0	0	0	1004.257846	0	0	0
PI(16:0/16:1)	0	1784.367994	936.0976337	733.5648627	0	1391.394405	3590.770281	0	0	0	0	1566.991393	0	0	1132.490176	0	0	0	1566.991393	0	0	0	0	2207.243294	0	0	0	0	0	0	0
PI(16:0/18:0)	5770.605131	2861.052389	1846.614334	3898.897839	6849.408595	2195.921336	1820.304627	3088.520585	4893.623504	2083.252833	3748.441814	2188.222459	1490.376962	2816.428709	1596.725448	1665.593326	0	3579.85533	2188.222459	2150.610122	1619.559828	1497.444475	1028.063051	4523.458276	2985.490491	2146.252822	708.9618312	3518.252289	0	3532.908869	1688.905077
PI(16:0/18:1)	6747.275345	4639.260289	4168.933068	13693.40752	5517.840615	6049.818154	4053.891101	1282.965193	5823.465436	2379.287185	0	1620.535891	2509.681178	1526.43472	8929.664996	0	0	2459.206087	1620.535891	1244.366052	1626.378067	5047.476933	0	2351.282401	1673.858838	4267.521134	2491.311874	0	1984.485551	3613.77347	1518.924555
PI(16:0/18:2)	5406.067635	3400.627338	10622.8337	10902.13158	2517.204062	6950.127783	14343.37633	1564.898024	7985.541341	1400.126721	0	3086.006684	2769.188081	823.7149467	6477.454296	629.1684431	5439.185461	932.1766287	3086.006684	2056.059381	5542.560794	7696.594454	4535.828714	5414.532378	3764.36069	4319.793978	2329.251401	4894.494871	2251.931915	1384.26925	1946.152485
PI(16:0/18:3)	562106.7289	962700.6186	145054.5574	519118.678	494822.9914	259340.928	639046.9688	254174.3958	287984.0681	196928.1333	391054.6891	662833.0513	88189.00701	325754.0385	194163.7129	426204.2113	64945.12977	1292476.836	662833.0513	269649.5239	413676.5185	254339.3125	33596.17208	238862.3136	214288.7128	284762.9109	398567.1946	196471.6221	112274.7015	398587.5298	302215.191
PI(16:0/20:1)	0	0	0	0	0	0	0	0	0	0	0	1041.035831	0	0	0	0	0	0	1041.035831	0	0	0	0	0	1518.17718	955.6227467	982.9131283	0	0	0	0
PI(16:0/20:2)	765.5874504	1053.259437	0	1572.402301	0	0	0	0	1539.502168	1835.038885	0	0	0	0	0	0	0	0	0	1005.938575	2086.032078	0	1044.819398	1041.905742	0	1047.891703	0	0	0	0	0
PI(16:0/20:3)	2643.893737	0	390.3562438	0	260.5332226	0	0	0	0	0	0	0	0	330.6049495	261.4435613	0	0	0	0	949.0978802	0	291.2971504	0	0	0	0	1566.527954	1045.368216	0	0	0
PI(16:0/20:4)	4918.244224	18382.3035	7366.248484	10399.56326	7928.592591	16613.57237	11898.96957	1897.606156	7499.920885	2539.772964	1042.61047	3563.347934	1404.716592	2125.266733	17697.27718	5428.808219	2615.378287	1582.711373	3563.347934	4429.457983	4320.420072	8380.529935	1610.418695	2566.420523	5024.546722	2682.785904	4351.337646	2413.453813	1059.848755	5879.156024	1914.775151
PI(16:0/20:5)	0	0	0	0	0	0	0	0	0	0	1028.310946	0	0	0	0	0	0	0	0	0	1006.03591	0	0	0	0	0	0	0	0	0	0
PI(16:0/22:4)	1466.08974	0	0	0	0	0	938.4092265	2079.948519	0	0	1591.017041	0	0	0	0	950.1826698	0	0	0	0	0	0	0	0	0	0	0	0	0	0	0
PI(16:0/22:5)	1866.561002	2102.78031	0	2139.282182	1568.774769	1433.049655	0	0	0	0	0	0	0	0	2613.618072	0	0	719.7204815	0	1030.712421	1564.072779	0	0	0	1021.106967	0	0	847.4201623	0	1046.656501	1571.499428
PI(16:0/22:6)	2615.975724	0	0	0	0	1414.765871	1049.412509	0	1560.517487	955.5435265	1447.692273	0	0	1057.149525	0	0	1054.404592	1625.501712	0	0	0	0	0	0	0	0	0	1541.808306	1425.998312	0	0
PI(18:0/14:0)	0	320.6180393	0	0	0	0	622.0154141	0	659.1719384	0	394.7770505	0	0	0	0	0	0	0	0	293.4183967	443.499666	318.1759531	0	419.0003177	0	0	0	0	0	0	0
PI(18:0/16:1)	1393.325295	1534.335681	0	1558.051109	0	3105.5189	1695.155413	1055.560556	0	0	0	1550.699821	1574.526236	0	3588.167153	0	0	0	1550.699821	0	1051.985193	1039.831439	0	1041.896521	2099.182286	0	0	1494.902215	2006.642644	0	0
PI(18:0/18:0)	2884.859995	10959.52329	10565.54482	4506.509797	5036.247923	1994.416692	2411.242435	3439.485466	2263.264453	2019.254543	3527.941674	2592.189884	1015.035871	2549.925705	4339.449273	3123.905256	3093.806742	2995.026041	2592.189884	2497.817104	1555.364901	3412.315588	0	4158.302068	11162.2154	2696.902888	0	1181.936552	1500.764285	6556.463615	1988.063861
PI(18:0/18:1)	1890.699306	4407.251652	3972.925037	5580.901649	4205.045625	5862.522029	4342.644734	3451.253213	901.0132932	2491.946014	841.0380435	1273.927497	1967.960279	1517.772261	5926.783131	3269.293299	2619.687601	1816.110051	1273.927497	0	7015.617816	2564.258888	1016.905209	2938.511517	4651.190118	3101.448407	2373.737047	0	1318.538932	1503.522373	1512.824681
PI(18:0/18:2)	7253.462756	10365.26831	10196.51274	21764.97829	13787.1049	17568.918	19891.92269	6805.177713	10797.11636	4761.190754	0	2931.760189	3950.029391	3711.613347	4554.997539	22713.01439	6840.3998	0	2931.760189	808.5470434	6133.801595	1811.534698	2874.285867	9562.594001	12233.20499	15905.43467	1586.553935	6068.951327	3379.287706	10170.77258	2913.761946
PI(18:0/18:3)	0	0	0	0	0	1042.96217	0	0	0	0	1490.530302	0	0	0	1419.959895	0	1053.501693	0	0	0	0	0	0	0	0	0	1041.310249	1038.162278	0	0	1514.583842
PI(18:0/20:0)	709743.3682	698305.7677	324231.2561	744868.8511	639269.2359	701744.8876	479258.6	519706.9975	531747.7519	337863.9197	764014.9965	725973.6314	80538.90684	437838.7313	506299.0188	516728.3162	124533.3257	784054.9685	725973.6314	448258.7048	269792.1365	562801.9646	9500.447503	605369.2793	479699.4108	171301.2049	312743.0431	322515.3677	138901.5945	336026.1345	342261.5342
PI(18:0/20:1)	0	0	0	1049.517764	0	0	602.7781375	0	0	0	0	1079.350174	0	0	0	0	0	0	1079.350174	0	0	0	0	0	0	0	0	1039.910114	0	0	0
PI(18:0/20:2)	1586.776058	0	1573.611384	2399.192757	0	0	0	0	0	2581.210103	1000.34414	0	1552.26217	0	1928.532045	1411.145315	0	0	0	0	0	0	0	0	0	1571.199519	0	0	0	0	0
PI(18:0/20:3)	26227.68983	21943.36041	5353.659254	15667.82493	5493.253358	4685.164212	2218.219124	3147.487379	5113.988672	4507.734628	1438.985347	0	4014.287955	1426.510238	9588.60106	7083.509171	4187.782608	1816.024978	0	2620.251814	14005.48018	9832.191425	2037.328009	1911.422657	4434.325071	4297.116329	925.6023339	5566.473019	0	2602.758594	1236.527183
PI(18:0/20:4)	30978.34769	55250.30868	26235.78542	193979.9137	95994.23436	85925.13115	35206.06158	12646.58796	44627.1513	12931.43468	4468.171992	9953.128485	4052.621253	11013.96248	352637.2133	40006.75078	32808.69366	4526.871127	9953.128485	4934.827094	87910.21056	91991.63532	18259.91715	46461.87314	67358.68034	77500.58718	6086.586948	16446.04357	5838.830845	16184.66482	4280.256633
PI(18:0/20:5)	201.0778514	368.1639283	204.1812163	0	0	0	252.2133592	0	272.2070282	295.3814905	255.8243608	319.4236165	0	0	0	233.8266708	0	0	319.4236165	0	0	0	0	0	0	226.1234374	0	0	0	268.8841848	0
PI(18:0/22:4)	1474.772316	2517.559757	1573.680785	0	1038.537292	1212.140908	0	1548.061075	0	2792.529829	0	0	1470.629134	0	0	2051.334616	0	0	0	1552.099353	1559.665187	2924.817222	0	0	1366.847232	1250.032474	1293.159956	0	0	1027.806851	0
PI(18:0/22:5)	1458.494244	2130.937091	1386.90887	1460.524107	0	1027.711602	0	937.9243748	2594.554413	0	1057.467235	3788.379527	0	1053.948587	3941.880448	1316.348895	0	0	3788.379527	973.1309291	0	0	0	0	3115.162649	1011.225611	0	1051.92004	1020.179943	2236.019748	1563.503947
PI(18:0/22:6)	2432.891004	3129.25656	2096.013405	2873.485698	3655.283112	1753.387203	1445.237191	0	2224.489565	0	0	0	0	1019.343412	1514.481177	0	1541.161024	0	0	0	1052.797872	1181.31119	0	1565.368392	2812.334763	0	0	994.5888214	0	1879.325039	0
PI(18:1/16:1)	1073.218065	2511.896628	1289.607754	1927.441056	2688.903458	1432.890992	2467.167314	1144.099263	2326.122662	1037.889698	843.6440318	0	0	1049.656444	1564.084904	747.6667572	0	1624.890398	0	751.1873152	2121.598224	1010.034789	0	1181.779709	0	1049.517764	1859.788195	0	0	917.0190653	1021.264585
PI(18:1/18:1)	2042.901809	3742.256834	2975.936308	8383.027398	3570.079858	3080.060534	3159.465626	2603.093055	6259.653754	1447.256508	1026.656036	715.7574884	2451.899091	2082.205596	14488.78459	1545.438851	2608.886002	0	715.7574884	0	5392.470553	2151.191961	0	4301.527175	2270.729261	3867.702883	0	0	2947.055541	3681.824165	0
PI(18:1/18:2)	3731.980662	7022.51468	1071.76606	2970.300884	10614.74656	1267.099847	2891.87358	0	3190.356905	3649.867355	2176.426557	2919.16871	2435.00946	2362.771679	5481.176757	2647.322295	1917.795497	1904.62385	2919.16871	2592.329359	2420.310816	0	0	2840.102011	1305.10318	3114.265306	2600.613573	2166.81087	1731.075264	3918.298826	3118.113623
PI(18:1/18:3)	0	1518.882451	354.7345892	0	0	0	845.0362785	0	333.1654468	0	0	0	0	0	0	0	0	0	0	0	1314.094915	685.3912207	0	0	0	0	0	0	0	0	191.096326
PI(18:1/20:1)	0	354.4361038	417.7387617	0	659.5686632	222.342749	208.6664005	0	0	0	0	0	0	0	0	0	244.5140911	0	0	292.4886415	0	208.8358595	337.0119494	248.4032297	0	0	197.6225663	0	345.9541544	0	0
PI(18:1/20:2)	0	0	0	0	0	0	0	0	0	1049.609262	0	0	201.8969805	0	0	235.0370007	0	941.5643266	0	205.6094663	221.7972507	0	0	646.0379637	226.7000437	215.2450725	0	161.3841003	0	0	230.6695634
PI(18:1/20:3)	4122.316181	5572.324067	2892.460022	3630.090922	3975.294289	3869.130552	4321.306062	4303.122112	3276.868069	1643.508733	2453.29923	1325.1096	2187.277102	1461.225074	4254.703316	2479.730504	1306.271927	2048.614281	1325.1096	1870.258443	3835.816732	6512.544699	1183.092233	7672.899179	5418.79395	3408.489766	2492.459427	4746.432117	2971.0817	1659.497371	3116.37552
PI(18:1/20:4)	7072.429055	4038.973254	1892.0219	3307.902168	7023.512735	2843.728701	4231.199636	4763.01663	3009.962263	2240.446649	2964.092939	1993.047621	2572.62532	3135.957916	11875.963	5707.103616	2523.968317	2896.449269	1993.047621	8872.253354	7125.948121	4318.785394	0	5893.609208	10234.0278	4252.91779	2481.762668	3840.645366	2468.93133	3113.375946	3465.426253
PI(18:1/20:5)	183.6400668	198.9591724	0	0	0	189.3745437	169.5487765	0	0	0	332.4597245	602.5216343	0	193.2662487	0	0	0	680.673801	602.5216343	0	379.2677143	0	0	288.1451788	163.6789139	375.0507685	0	0	0	317.5842656	377.0244258
PI(18:1/22:4)	0	2371.242021	2358.842535	0	0	1545.203413	2604.651741	1532.442079	1902.105569	0	975.496283	0	0	1039.38756	4084.343353	2099.071376	0	1625.284127	0	930.5377894	0	0	0	1512.552941	1924.382799	1535.386547	1580.766881	0	0	1076.790355	2492.476074
PI(18:1/22:5)	1049.267437	1705.165432	1572.929792	2084.885511	2147.590163	1410.480058	2019.696594	1393.453491	2576.582219	0	177.918733	1668.513809	0	1396.248274	996.5210103	954.7376681	0	0	1668.513809	733.4602978	2055.68457	1283.790381	0	951.1881684	836.5708892	1591.373907	948.2323068	987.0664729	0	1105.644242	1316.882437
PI(18:1/22:6)	0	2909.338147	1955.466244	1261.996944	1977.01691	5300.582326	1117.47326	1404.519291	0	0	2010.963254	1152.857665	0	2175.170877	2510.98055	880.6380177	0	3446.801797	1152.857665	1110.236997	1381.772967	2835.607251	0	1977.345646	1923.59967	0	2496.672979	1391.530072	2387.661863	1034.530621	912.5730293
PI(18:2/16:1)	129060.4909	229384.7747	116674.6598	197364.0701	274808.7166	161569.0075	94694.85396	95889.11412	257516.3656	108208.7682	178002.656	195451.2235	40174.77272	178602.3563	209263.1296	272131.0088	111793.6082	271086.1249	195451.2235	183804.9545	253622.6802	163603.072	9886.852465	297437.9414	213814.4788	163984.4491	235604.231	152474.7258	64519.96808	154384.9394	148589.3853
PI(18:2/18:2)	694.833121	15021.77752	2951.572073	2904.3247	9555.542458	3521.538172	2278.331702	2495.91958	3402.069772	0	3326.059991	7750.721992	2243.407087	5786.334516	9839.822743	6511.587456	0	5229.939276	7750.721992	4755.879541	8624.380661	2340.288371	1514.55064	4042.355426	13297.19412	8448.297677	1325.828372	997.4435536	1273.421626	3238.157605	5504.188598
PI(18:2/18:3)	0	294.9399882	0	0	252.3776622	0	0	0	0	0	0	318.2557152	0	0	493.8397364	308.6201866	0	0	318.2557152	0	0	0	0	0	163.7011612	0	0	316.2029015	0	303.3862709	0
PI(18:2/20:1)	0	0	0	0	0	0	0	0	0	0	0	0	0	493.8369144	0	0	0	416.6971463	0	0	0	0	0	0	0	0	232.0381436	144.7716596	0	0	0
PI(18:2/20:2)	212.1338873	0	0	160.4981436	0	316.784049	338.6846197	0	0	0	361.8381659	0	223.1188447	0	0	0	0	0	0	320.8920151	0	0	0	0	0	0	0	0	0	0	268.1000949
PI(18:2/20:3)	1543.434316	2031.015562	556.6464263	1339.221923	803.616043	1227.067715	1122.194885	2028.305738	2657.218367	2353.930177	2016.96346	858.007012	1255.311432	2347.82296	473.3667135	3662.060788	1120.548952	2862.472336	858.007012	1778.564155	756.8618257	2470.982917	1356.556292	753.6607741	2032.251818	809.3920704	1409.033765	1794.191749	952.3057832	2682.973844	2627.832338
PI(18:2/20:4)	10711.70999	14609.52571	12471.8872	22221.53846	13768.61962	20046.1818	15340.82331	12046.78635	17146.78269	9731.091804	13493.35095	8569.188183	1400.904361	19183.14616	12316.81755	28970.17542	7479.295126	31647.02879	8569.188183	13261.44387	67732.62606	10620.42744	0	16980.75211	17461.34987	13196.4182	22453.19999	15481.70784	2160.830462	15306.57949	26878.93766
PI(18:2/20:5)	577.1321567	0	0	0	0	0	0	0	0	0	0	1221.847428	0	318.9001883	0	0	0	876.6259623	1221.847428	0	0	0	0	0	0	0	755.7220303	0	0	0	0
PI(18:2/22:4)	0	0	0	0	0	572.5187932	0	1081.115412	0	901.0498219	880.0582758	0	0	0	0	0	888.3302432	0	0	651.4596571	0	0	0	0	0	0	1997.069804	0	0	0	1401.122642
PI(18:2/22:5)	2445.382202	1352.295385	1074.698177	1057.30694	822.5801448	2408.790152	1790.782095	1578.637849	840.8920189	1070.739486	1819.791214	1379.228584	1598.009426	1074.963023	980.868694	626.619075	188.5106453	1462.252396	1379.228584	1133.954175	574.3948881	2194.214723	250.5084738	0	549.3505158	841.4589185	1223.523576	669.6404327	0	600.7227114	623.3180722
PI(18:2/22:6)	890.5178234	1162.654328	0	1161.813528	1859.542013	1922.75571	0	2248.942247	3110.685727	894.6493031	865.7352946	1723.444359	0	836.2483782	0	1138.172942	1864.767841	4027.68416	1723.444359	831.6923232	2418.552909	1537.499824	0	4378.841079	1612.798318	1098.411129	833.1717083	1390.132432	0	1417.768771	0
PI(20:0/16:1)	7259.829746	8640.507116	2648.73871	12793.30511	11522.50621	4828.039188	5791.274869	4350.875626	6891.980512	1693.241738	6730.021274	5774.178615	2256.286915	4704.220579	5757.393804	4857.232816	1619.803597	9032.349854	5774.178615	4619.849729	2741.064547	4102.2857	0	8713.28997	6045.297048	3548.039511	1327.140402	2078.879003	1434.273333	4167.945433	6891.35129
PI(20:0/18:1)	46623.99687	95037.29859	32057.24519	72957.55653	77862.06596	44543.3324	43907.88788	36726.46303	55151.45088	41304.45806	62423.76596	44238.66233	8211.338879	45693.83428	63246.43599	50076.49927	15167.9375	73550.20519	44238.66233	48591.80048	23215.8593	52285.93683	1474.321975	86820.79319	47653.70834	26960.67699	41650.6767	40033.10222	16990.73485	41268.76822	41294.81741
PI(20:0/18:2)	15400.78	20218.25641	2459.325704	20472.99556	35797.74348	8066.728871	3983.665309	4093.136596	10669.15908	4638.82739	11638.44553	14008.86744	3333.750301	13503.39811	10872.52488	12991.27229	6121.045713	23602.77637	14008.86744	11536.94911	12298.52773	9157.072464	0	19902.13183	13056.24046	8081.431115	9131.895256	6122.158382	3630.222484	9913.949776	6452.380692
PI(20:0/18:3)	868.7411894	592.0099157	582.1033115	0	1242.835958	0	0	0	0	558.2316699	0	0	0	0	0	0	0	1177.078291	0	0	0	0	0	0	0	0	0	0	0	0	0
PI(20:0/20:1)	3557.948217	5656.916951	2618.68122	2895.910331	3638.810307	3433.346153	0	2665.560239	2901.710579	0	3519.141503	1732.779537	0	3458.466278	4445.472945	3892.153005	1310.135548	5882.471392	1732.779537	3418.83973	1152.739358	7185.922904	0	5823.960544	5162.814617	1917.695326	2283.496407	1391.896626	865.733051	4450.396031	4205.654146
PI(20:0/20:2)	898.4154855	2827.278556	590.5603157	1611.700025	5342.535054	3032.194104	1147.169992	0	0	901.0498219	1736.280875	1154.507693	0	1949.670904	3470.207372	2708.985056	0	2317.84749	1154.507693	1110.786018	1105.499952	1244.769955	0	5596.451599	2336.533258	2491.305033	2791.176763	0	834.9436348	2259.967345	1171.666763
PI(20:0/20:3)	2124.443496	3213.697147	0	2277.974944	2530.989499	1971.39694	1792.825128	1789.851304	1419.144434	1230.941354	6097.35772	4393.267992	0	1858.094178	1274.598958	4262.324006	2255.316765	0	4393.267992	3913.964672	1387.912905	0	0	1372.955474	1806.922839	0	954.7208109	1679.758432	845.7462278	971.6501574	3899.818721
PI(20:0/20:4)	12727.53828	17037.49451	4457.154699	12657.46811	12912.84326	3350.703158	2803.398302	4847.235971	6849.69066	2734.915523	4859.640702	5271.039477	0	4855.82931	6780.371147	5727.879973	1802.812966	8258.271605	5271.039477	5882.587035	7894.377398	4930.783003	0	2951.327974	7827.990028	7074.614775	3692.259452	7808.535458	1328.994201	4129.087013	3626.958604
PI(20:0/20:5)	0	0	0	0	983.7172973	0	0	0	0	0	0	0	0	0	0	0	0	0	0	554.6514433	0	0	0	0	0	0	0	0	0	0	0
PI(20:0/22:5)	804.0444688	558.4842392	0	0	1863.234021	1209.569156	1086.051852	637.637382	911.1772143	0	1186.006769	0	0	2446.473524	733.808254	0	0	0	0	1160.233046	610.7153772	0	0	0	0	0	0	0	0	545.2183481	0
PI(20:0/22:6)	0	0	0	0	0	0	0	0	0	0	904.494753	577.8499305	0	0	0	802.3684701	0	0	577.8499305	0	1417.838375	0	0	0	0	0	0	665.1068306	0	0	0
PS(14:0/14:0)	0	0	0	0	0	0	0	0	0	0	0	0	0	0	0	0	0	605.6809749	0	1132.839916	0	0	0	0	0	0	0	0	0	853.9174415	0
PS(14:0/18:1)	1041.271109	871.2023222	841.5599311	0	561.3728844	512.1740979	794.4530916	441.3037861	0	1458.660615	1528.770044	3633.833287	0	194.5739312	689.6682279	0	132.8579651	834.6807674	3633.833287	985.6279689	0	846.6732765	835.9723326	175.9525329	0	0	481.8803951	0	498.3769051	0	0
PS(14:0/18:2)	1845.391831	6084.030395	849.5571663	3994.185089	2636.980361	1178.572458	1707.864258	2060.966316	852.6793165	2912.473884	2121.442175	1803.630937	0	1825.014098	2873.254104	3208.569015	0	2315.235411	1803.630937	3248.347294	2068.556123	2277.274326	0	3172.322626	851.7202474	2555.329908	3831.906674	1196.587955	582.4239551	2924.097264	0
PS(14:0/18:3)	711.802317	0	0	0	0	0	0	0	0	0	0	1181.015088	0	0	0	0	0	1195.15801	1181.015088	227.7636854	0	0	0	0	0	0	0	0	0	523.0224044	0
PS(14:0/20:1)	0	0	0	0	0	0	0	0	0	0	626.1648566	0	0	0	0	0	0	589.6494566	0	0	0	0	0	1830.956819	0	1077.975018	0	0	0	0	0
PS(14:0/20:2)	785.4783871	586.4273718	0	959.9765821	0	0	0	0	0	0	1180.804749	0	0	0	0	0	0	307.1823984	0	0	0	0	887.701856	0	0	0	0	0	0	0	587.6930781
PS(14:0/20:3)	0	0	0	0	0	0	0	0	1375.511907	1393.342373	1577.29243	0	0	0	0	1012.316425	0	468.9788873	0	1038.992988	0	0	0	0	0	0	1511.518971	0	0	0	0
PS(14:0/20:4)	4372.561821	6984.523604	7273.655798	7203.765083	13100.97132	5371.769657	10186.45502	7158.590495	5974.167593	5535.838996	4182.076148	7299.096936	7052.422226	6297.099151	10223.08835	3031.768313	0	8245.684411	7299.096936	11043.50018	5775.838898	3799.326139	0	4478.361005	11572.18384	4114.368206	7338.774983	0	4047.979938	7971.868766	16928.84761
PS(14:0/20:5)	2589.187356	5732.863079	0	0	2067.959574	0	2620.645623	1041.64283	1049.122943	0	1568.332284	0	0	1549.527031	1554.048674	1720.261745	0	2097.925527	0	1510.575228	1013.902592	0	0	2073.799818	1570.66114	2091.750897	2514.03523	0	0	0	0
PS(14:0/22:4)	3145.002015	2483.41317	2584.578986	0	1550.646535	1405.211873	1953.166187	1557.779199	0	0	3136.811455	1044.518903	0	1521.616603	1555.655984	1072.725384	0	4181.227367	1044.518903	0	0	0	0	0	1540.400729	3617.448592	0	0	0	1762.704611	0
PS(14:0/22:5)	6385.739414	0	370.4237931	1274.206348	1062.496724	413.0447512	209.151467	442.5186455	277.3801964	1330.901598	1407.438214	3185.736838	258.2953261	257.9978286	0	223.0656876	0	1937.970038	3185.736838	221.3148362	450.6690324	374.8773178	0	0	396.5514707	411.2407301	662.7570992	0	261.3397841	133.1827688	0
PS(14:0/22:6)	0	993.8376807	1225.340496	0	2488.871336	0	956.1817975	0	0	0	0	0	0	0	0	1029.731444	0	0	0	0	2218.043633	0	0	1198.20054	0	975.7251957	0	0	0	0	0
PS(16:0/14:0)	0	0	0	0	0	0	0	0	0	0	846.3167024	0	0	564.336507	528.696564	0	0	0	0	586.7984738	0	0	0	0	0	0	1468.483121	0	0	881.3519522	583.7720001
PS(16:0/16:0)	2385.853267	0	873.1499147	0	2247.434051	1296.428504	819.9295197	1308.405225	1121.748467	830.8161496	1190.622132	0	0	0	791.4441017	1042.459365	0	0	0	591.2889864	0	846.0730948	0	0	849.8843996	0	1181.541072	0	0	0	578.1671264
PS(16:0/16:1)	0	551.9501923	0	0	0	590.0005458	0	569.046395	0	0	879.1963398	0	0	1465.616234	0	0	0	0	0	0	589.086841	0	0	0	0	0	0	0	866.2056384	586.8448596	0
PS(16:0/18:0)	21061.17609	19385.15084	8719.440589	9762.276646	24919.03184	12166.93448	29679.98891	11024.91892	60831.25224	7026.984389	9431.015029	11416.33189	4696.440728	8291.990254	15543.14263	12748.19355	10455.72807	18314.39875	11416.33189	10002.33739	8632.684991	11291.46053	4189.078309	18296.26544	10842.85674	5708.914168	22369.1933	5601.050806	7303.177689	7794.409394	2596.151818
PS(16:0/18:1)	2061.78292	6814.853339	0	5733.918064	5721.488456	3287.704252	3123.992683	5049.5792	2357.490457	4105.126345	2915.80846	2277.750043	1248.745657	2196.274698	3493.543093	6318.124734	3066.454103	1107.174182	2277.750043	0	1986.630464	2058.416969	1576.302092	2082.668545	2164.541013	2573.498576	2493.400896	4066.674065	1495.461825	3359.446427	2257.451382
PS(16:0/18:2)	4517.357512	2020.913073	4116.406169	1544.405821	2440.721061	2015.172679	2909.610601	0	1992.256746	2022.500703	4681.843493	1408.443091	1864.425883	1965.590658	3899.715175	1412.698621	1030.763525	3119.540907	1408.443091	3156.065901	3863.34692	992.1384966	2569.386967	2528.176791	4815.336697	2545.815226	4182.292484	0	0	2883.366332	0
PS(16:0/18:3)	1568.454127	0	0	0	0	0	846.1342107	536.1860878	0	0	0	1103.413159	0	0	0	0	0	1044.523467	1103.413159	0	0	0	0	0	0	0	0	0	555.8799785	0	588.1839487
PS(16:0/20:1)	1234.099936	0	0	1458.222147	0	2361.141169	0	0	0	0	0	1560.712397	0	907.338601	0	1734.159803	1114.644058	1030.923401	1560.712397	1207.421832	0	987.4615789	0	2225.608521	3890.543868	0	1263.359718	0	0	0	0
PS(16:0/20:2)	0	0	0	0	0	0	0	0	0	0	0	0	0	0	0	0	1215.736045	1051.937156	0	0	0	0	0	0	0	0	0	0	0	3059.338973	0
PS(16:0/20:3)	0	1879.308988	0	2023.19662	3588.127559	1037.077885	0	0	0	0	1531.272772	0	0	1002.618828	1044.856704	0	0	0	0	1534.78437	1381.286201	0	0	1558.274569	0	1552.308402	1044.825098	997.2290765	0	1848.74911	0
PS(16:0/20:4)	19905.31026	22393.41444	6277.644126	9645.063019	12246.89688	7653.367889	4312.170561	3993.808975	9354.278388	2059.125096	13660.73699	3978.874964	3036.70398	2666.293132	9171.730591	13071.92962	2059.618179	8367.9963	3978.874964	6859.875484	8828.440325	6980.764456	1042.668722	9241.511273	18215.28866	8138.312793	12134.29701	7095.017845	4532.826165	8253.978456	9118.014173
PS(16:0/20:5)	2299.424888	1533.951996	1547.004161	1561.607368	1540.342237	2547.059618	0	1515.128958	1016.317649	0	0	0	0	0	0	1574.503236	917.0462738	3133.800093	0	0	1408.083474	1912.056704	0	0	1550.850832	2080.880675	1564.666906	0	0	1403.476334	849.5205869
PS(16:0/22:4)	1447.662621	2375.387021	0	1506.969869	0	0	2058.917449	1560.160262	0	935.0931006	2314.228607	0	0	0	0	0	0	2570.974673	0	1089.853443	2373.013887	0	1540.214017	0	1898.995434	0	0	0	1086.09293	2085.717224	2055.462899
PS(16:0/22:5)	1572.410621	2766.378165	1061.618256	1637.056443	1236.497498	0	1543.643951	1608.026741	1020.00164	2067.862217	1338.889322	4366.811288	1469.182158	998.3759805	3050.144721	0	0	3104.273347	4366.811288	1947.462202	0	1017.960792	1561.710793	3738.928037	1580.662904	1028.668846	943.979006	0	0	0	1101.403772
PS(16:0/22:6)	2088.763385	0	0	0	1730.512018	0	978.8107505	1559.360387	0	0	1454.322299	1895.775151	0	0	1215.638864	0	0	4351.142095	1895.775151	1469.759233	0	1200.309777	0	0	0	955.6830214	1856.290476	0	0	0	0
PS(18:0/14:0)	0	0	3087.186953	1545.724992	2571.235552	0	2057.98717	1512.753583	3567.568353	1026.243752	440.7912632	4716.149042	996.0142911	1000.405459	1016.099255	0	0	2092.012451	4716.149042	1137.202859	909.014524	2058.936443	0	0	1542.148731	0	997.4730552	1495.031514	0	0	996.8677669
PS(18:0/16:1)	1565.036637	6397.340381	6711.981148	4647.958853	7109.785372	3773.467608	18326.17158	7099.780362	4640.648083	0	3884.552184	4514.879123	2018.510206	2506.978586	7645.330923	5458.795266	2452.346165	4180.879141	4514.879123	1505.771843	4512.36443	4984.256639	0	1593.930143	2055.299366	1547.400721	1991.388691	2008.757703	2037.027026	5617.630999	2506.490819
PS(18:0/18:0)	505748.2502	1085389.14	564237.1195	490939.6558	685603.1035	471349.8473	910618.9034	855753.6946	1258779.626	366656.604	899673.1886	1240780.955	123336.76	347426.7462	746354.2021	839468.217	155850.6869	714356.5191	1240780.955	398322.0557	238521.6633	742534.3188	24455.29102	449853.1611	647164.6679	155833.6957	272338.4956	493164.5034	394938.6387	608965.2015	377869.8493
PS(18:0/18:1)	53652.71646	128782.1872	62236.71784	78959.67015	120139.7814	57421.76435	102308.1096	84039.28669	86585.62028	51085.19522	98462.95861	155413.3936	31346.33395	35843.78607	89332.36607	110316.2809	23419.57801	84215.49308	155413.3936	77430.87541	33753.1675	84653.10156	11973.07357	51769.54719	116133.6553	37240.17898	39750.7343	53735.88727	30366.77713	82435.93676	50280.42317
PS(18:0/18:2)	10985.02766	21065.28204	4581.980965	33147.21577	27638.13853	11212.5333	10993.39973	8855.166356	19313.88518	9118.656359	8227.928565	21691.6989	11207.66316	6166.725782	10424.51638	26143.97774	4160.088586	12655.25596	21691.6989	14783.88805	10045.74894	11920.00617	1040.447318	21755.04373	24063.08389	13475.53082	9690.107256	8296.536902	3833.589596	6836.278501	10197.93385
PS(18:0/18:3)	2224.829006	1319.843172	840.9231054	1116.06137	1524.463236	1890.592856	1983.613217	1625.121446	1053.487595	1164.039354	3007.67626	3221.246656	1345.881814	2534.052875	1409.309075	950.8171564	2218.654283	2960.69505	3221.246656	1290.07251	1948.67372	1507.236161	1115.573919	1706.719432	1621.252035	2155.109244	1608.102801	2039.13534	1103.362051	1633.921027	2560.766238
PS(18:0/20:0)	40940.52878	56631.44793	25490.44976	67798.62126	58182.54692	94223.31064	116595.68	60957.53749	37106.64594	12054.47765	58442.54919	61949.87378	11652.91727	25097.67181	40315.43577	44691.81782	6518.539402	66586.8211	61949.87378	23848.9947	42428.47828	44863.13018	821.1299507	63452.2756	51789.83869	17851.54879	34588.20799	12497.2269	26393.92089	35634.98116	32154.92743
PS(18:0/20:1)	2082.853443	14061.98484	4273.164946	2423.212462	9871.275601	5212.533523	2286.702961	3644.565223	2079.992513	1555.395379	6266.166542	2092.939009	0	1026.20683	5214.481529	7297.334075	0	7122.842058	2092.939009	3099.296892	1445.272427	5194.674459	0	4690.63582	6755.630539	0	5089.054677	7248.627236	0	4675.10607	2589.687768
PS(18:0/20:2)	1567.646574	5729.886481	0	5197.636512	2045.834164	1023.022157	1557.187725	1893.62768	2073.163731	3111.751275	6796.160244	0	0	2073.08639	2084.555528	0	0	3132.713975	0	0	1043.469599	0	0	0	3972.212887	2596.796524	0	3605.42286	1552.147201	2362.148924	0
PS(18:0/20:3)	343912.8114	416186.5249	305334.5926	357086.7681	682921.3062	815075.0009	283544.9054	213918.1728	407657.4886	179873.8837	363432.0447	363487.9279	346098.447	361629.5433	353948.7474	369074.0239	280825.9951	451365.6892	363487.9279	371575.1422	473426.8994	368327.8199	198682.0667	369266.2542	495061.5391	434810.8996	366299.972	263006.0108	299467.6452	399540.3482	343017.4347
PS(18:0/20:4)	19882.05093	38180.05971	7801.652033	13619.01117	33601.31013	15827.88175	8832.718926	18874.67828	22882.03065	3524.187226	21524.23469	8763.55051	12518.75463	11004.96389	17228.83464	31755.80462	2574.976945	23875.25945	8763.55051	11613.70398	21605.5181	11976.50327	0	20055.11086	24067.05056	7883.982605	13763.13501	13018.43919	4549.192428	26903.85951	11409.57804
PS(18:0/20:5)	2758.180625	1889.121104	4625.143115	0	2662.649685	2684.87768	5935.79959	2397.358791	0	1313.907976	1304.657888	1766.158662	1719.526295	1934.539092	0	0	1894.287896	8266.084961	1766.158662	832.2754273	770.8717054	0	0	1502.616753	0	2174.33173	1492.539925	1568.305373	1223.844321	1140.37069	1238.634239
PS(18:0/22:4)	3766.806103	2081.178501	1734.077993	1886.296043	1773.836249	1544.117766	2170.181225	1919.364506	2302.812714	0	1080.506703	442.6667262	2108.897166	3712.234699	1809.363937	2723.024851	1565.456166	1122.642464	442.6667262	1360.967505	3872.653002	2781.457628	0	4734.776217	2937.989779	2636.403472	1617.131874	2058.819554	835.0213569	2820.582642	2146.403599
PS(18:0/22:5)	64608.04001	61729.1168	78849.02321	36373.06344	37032.28082	63307.00656	30913.30803	14348.08044	40718.88716	33610.00024	31371.35837	39786.42147	31760.29668	59395.79319	23379.75597	52837.11249	25679.50356	40855.07379	39786.42147	43171.4481	37111.8582	37201.82585	20023.31153	54459.77001	42965.11822	27758.21369	33758.23041	29691.4944	30399.59603	45096.7367	36689.19037
PS(18:0/22:6)	1021.689154	1564.241213	0	0	4655.933408	1030.865688	1573.31023	1570.274445	0	0	1060.020541	2188.361722	0	1009.048947	0	4205.517562	0	953.7331892	2188.361722	2986.381578	0	2056.80164	0	949.3017457	2109.842957	1505.166618	2020.210193	0	0	1887.587366	0
PS(18:1/16:1)	17285.18208	8691.825992	5117.140619	5110.673614	7357.474545	11165.58091	8985.641242	9689.275673	4380.353057	4912.90017	14905.12297	5401.653486	4613.473968	4958.613503	4713.749198	7239.929533	5047.535366	6103.958082	5401.653486	2557.948597	6595.047658	980.8906599	5312.427023	1961.566139	8209.788575	6166.801812	8398.143265	3670.853	1186.018409	7438.763029	2162.5245
PS(18:1/18:1)	2821.811833	9827.71178	0	3519.877878	9803.03807	4668.829249	4461.113245	6624.726579	3242.042893	1016.528258	4702.694026	922.6316704	4026.139997	6065.322731	3209.611453	8811.923671	1023.256431	2977.131156	922.6316704	4732.194238	3074.683012	3931.484163	1415.609402	2524.044599	2982.234504	3645.476016	6205.198947	3358.748335	2692.002636	4537.497456	4048.66703
PS(18:1/18:2)	16319.25784	9137.50132	4534.41715	6165.947097	18001.14781	1750.359626	6261.27869	4401.724705	7200.996907	6678.466529	4037.937782	12296.36562	6363.772072	5252.306017	4882.077902	11067.90266	2421.745056	5862.243518	12296.36562	9707.552738	12659.25951	2373.843751	0	10664.26054	14045.48061	5749.664072	18346.35394	1256.781172	3520.562636	4531.825734	7547.619788
PS(18:1/18:3)	0	0	0	0	0	0	0	0	0	0	736.0270661	1621.677181	0	0	0	0	0	0	1621.677181	0	0	0	0	0	0	582.2126946	0	548.9353194	0	0	0
PS(18:1/20:1)	0	0	0	0	0	0	0	2574.052579	0	0	0	0	0	0	0	0	1022.375127	0	0	0	0	0	0	0	0	0	0	0	0	0	0
PS(18:1/20:2)	0	0	0	0	0	0	998.6267526	0	0	0	0	749.6591654	0	0	0	0	0	0	749.6591654	0	0	0	0	0	1449.415283	0	0	0	0	0	0
PS(18:1/20:3)	3837.596712	15655.26465	4142.65779	1529.405384	3423.218966	2439.875708	0	4792.765925	1805.30425	1554.066168	1722.889006	2064.779707	0	0	4548.191927	3075.076744	0	1290.426747	2064.779707	2062.274831	1551.816784	1048.885796	0	1564.341728	1558.224686	2720.798974	3103.97766	1016.204183	1919.940918	2055.449371	1547.460157
PS(18:1/20:4)	68408.33373	97048.34629	29187.25349	33245.50704	64633.04288	40658.53086	28037.02369	33709.39095	48521.29443	13189.66194	59850.89529	24068.41149	17491.83298	44205.01008	44215.53938	60956.51224	5384.940893	40212.10848	24068.41149	45342.01796	47528.36682	22140.09487	3347.104755	30496.00832	80820.29876	31698.78285	52974.40197	21290.56612	10112.79832	53299.48402	25404.6211
PS(18:1/20:5)	2896.217583	5210.834452	0	0	8363.918103	2077.959773	3673.68112	0	1536.07563	0	1042.460308	2058.627548	0	1555.939696	0	1548.413645	0	1047.385425	2058.627548	2581.559103	2467.547197	0	0	0	2096.640845	2594.579815	1578.488858	0	0	0	0
PS(18:1/22:4)	8819.453358	0	0	0	1544.29282	0	2545.696828	4633.707167	0	0	10487.74299	0	0	0	0	0	0	2063.865073	0	2573.862922	0	0	0	0	0	1004.205214	2998.663127	1044.420543	0	0	8849.64965
PS(18:1/22:5)	12844.77495	7820.552319	1564.674658	3624.684696	2591.462626	3646.777339	1515.518964	1607.952359	2634.104145	0	4326.724646	3647.533135	900.1156179	3777.365726	4965.949087	2494.333395	0	1352.15386	3647.533135	4355.50842	1310.120706	1011.382179	0	5195.112469	7016.147544	1927.617811	5009.312108	1044.208723	1033.604465	3641.543131	1007.242164
PS(18:1/22:6)	12004.01068	12657.81162	3622.269103	7327.466921	14423.04879	6780.652148	2237.848681	4171.040879	9248.369338	0	2289.56948	2147.641998	1564.091023	4682.923303	4358.234432	6332.895787	2103.921516	3758.955232	2147.641998	5518.680704	4173.227285	3331.770344	1555.936801	2611.811209	10037.8884	3240.714812	8202.240751	2046.330938	0	1205.967027	2975.357662
PS(18:2/16:1)	15775.46696	21227.83725	12929.46759	20873.78576	31092.53371	10482.74473	7509.078422	10329.14685	10108.17913	16332.15535	19145.18599	16087.34491	4297.95491	13169.31028	17404.10196	20206.50989	3796.508154	17579.62422	16087.34491	7466.736738	18122.1084	10817.81325	2021.192435	19597.39646	39951.7358	16932.81429	16973.74695	6661.213563	7483.627642	20442.53254	8133.100758
PS(18:2/18:2)	23602.35918	34477.5938	16674.66227	65195.2567	42563.72755	22192.15893	20954.84814	12758.74886	16105.25027	19924.85379	16173.29916	30139.65411	9886.859728	29484.26866	29171.59445	32437.0727	13329.77822	13880.41251	30139.65411	21692.15797	47744.78124	20834.2888	3127.531583	46962.38454	13973.09243	31328.60491	33346.47714	15542.52235	6330.597763	22466.58598	26999.78319
PS(18:2/18:3)	625.9294737	0	0	0	1084.502831	0	0	0	0	0	0	0	0	0	0	0	0	804.7526417	0	0	0	0	0	0	0	0	0	0	0	1421.118329	0
PS(18:2/20:1)	0	0	0	0	0	0	0	0	0	0	0	0	0	743.4894209	0	605.8878033	0	0	0	0	0	0	0	0	0	586.4917988	0	0	0	0	0
PS(18:2/20:2)	0	0	0	0	0	0	0	0	0	0	591.6424778	0	0	0	0	0	0	0	0	0	0	0	0	0	0	0	0	590.0693461	0	0	578.410221
PS(18:2/20:3)	9900.181898	12511.50969	2060.641744	14230.50157	5914.705661	2591.53543	4162.409253	2797.671707	3234.610135	4663.388977	4965.91786	4149.181548	1442.967441	3248.162145	10474.97991	7319.350121	1042.501358	6153.327957	4149.181548	3216.274522	13534.66604	1578.774079	1049.214756	4493.695032	17512.13752	4162.041797	8508.870038	1263.692896	0	3872.398401	3362.801055
PS(18:2/20:4)	86657.89324	106485.8589	30842.36031	130818.8525	75033.64289	74244.39093	55242.59802	48335.98025	38022.29854	14354.86981	87728.58794	15077.63984	20031.70793	57864.89564	49301.9254	83558.73261	13270.9157	47933.39977	15077.63984	59904.21603	86719.8702	24446.18947	3617.275712	41048.96725	156961.5773	38461.95716	68974.82517	30807.39917	23502.39846	110936.0166	64725.97791
PS(18:2/20:5)	1545.828634	3585.994834	0	3934.763379	6104.069544	1578.333483	3806.248273	1568.205668	0	2090.527777	2099.953574	2504.571692	0	918.8051734	0	2399.119889	1562.338378	0	2504.571692	1971.581786	2558.729424	0	0	796.8528855	0	0	2101.29211	0	0	0	0
PS(18:2/22:4)	4950.140093	7820.349017	3700.090654	8012.401593	2057.906442	5380.025302	1924.216235	6754.851786	4897.509558	2530.504617	2304.65974	1550.624787	1541.926955	2005.055579	4597.336863	4281.791629	0	1787.950322	1550.624787	2255.960767	3845.683543	2088.201566	0	2472.232669	4850.574869	1534.719578	1958.152851	2092.386986	1518.305022	3604.872815	0
PS(18:2/22:5)	7572.414261	3246.231716	2572.162739	9029.306332	7551.256926	3637.654177	5637.79369	4738.494634	10050.33597	1070.587987	3108.658135	2401.389708	0	0	3127.730252	6918.672638	2025.718907	1824.70222	2401.389708	4349.716877	3719.523611	2630.180729	0	1905.40248	5465.880747	2440.034066	5090.576038	0	0	0	3515.778744
PS(18:2/22:6)	3245.391639	5879.879121	8206.70923	4312.550153	17292.4442	10663.45418	11172.11607	3765.846315	11990.05364	1979.276205	5003.745429	3909.755887	0	1499.760628	4605.900757	5605.043364	1543.74855	10893.25447	3909.755887	9004.210062	7908.25846	4598.534197	1028.063051	6311.030345	2180.16678	3900.621108	11583.48775	3334.099035	2335.696338	3357.173156	5307.947901
PS(20:0/16:1)	32410.5956	44858.50433	19507.26885	56024.87905	22985.73042	66392.70797	93068.06622	26770.37805	20613.30398	13609.04437	47959.88567	63494.22936	8530.895696	19898.64783	53706.38607	19755.97485	3167.444218	20739.38489	63494.22936	24779.9047	19368.62321	26008.80705	4081.078723	24659.13101	31117.3402	10751.17323	13423.02125	18394.20934	20337.09955	29498.70736	24197.74299
PS(20:0/18:1)	7220.291202	7662.160141	11631.17964	7001.029514	2742.803943	5004.186706	11125.82347	1525.847045	10643.54419	3966.095982	10831.636	9193.684478	0	4002.524919	2039.61703	6940.887643	2014.840151	5445.391081	9193.684478	3302.382656	7262.997317	3321.656608	0	5948.636204	13196.84102	2322.923566	1370.923836	3009.775107	2371.748116	2734.667589	0
PS(20:0/18:2)	345638.7955	673591.4222	270317.1213	855452.6297	594823.9314	335681.6011	212841.8996	247292.6966	362133.9211	277878.4656	435441.9022	431618.0908	93650.49116	497532.2531	705223.912	401486.3149	111129.1811	497468.2939	431618.0908	323184.5359	352875.8313	413630.4472	30831.03343	736256.0137	543481.9198	394709.4256	320856.6028	296725.9866	159067.7086	354850.1091	364177.8696
PS(20:0/18:3)	6095.999384	27929.67054	4649.450683	27587.22487	12496.35408	9838.487419	11617.40719	4925.372475	3820.520369	3586.374108	10459.62917	8685.071132	2847.090961	10225.20998	9886.908059	7902.172138	1104.60493	43128.45121	8685.071132	4833.11675	4119.996416	8230.016459	585.5702093	8590.852212	7091.17228	12310.92891	7355.456046	4411.44198	4775.800742	6850.324141	4347.230102
PS(20:0/20:1)	0	2793.215294	3409.475323	1977.903493	2292.221505	3158.151291	1700.058257	3278.042901	2576.238448	1026.972642	1242.821112	0	0	1434.342303	2740.128119	1961.19449	1914.764181	3923.289895	0	881.3699091	1295.817483	3455.097273	911.6033622	3036.564686	3117.074751	588.2958036	2304.355255	583.4507513	0	4413.070927	2042.260537
PS(20:0/20:2)	8556.94973	11879.11554	5595.460482	20894.08475	11029.45232	8645.690505	7203.773511	13415.88845	6502.061043	6207.390105	9954.672052	13668.342	4308.680793	6937.274256	11325.405	6819.250866	1684.029016	7633.389967	13668.342	5973.051465	4417.218788	5380.503994	1128.559612	8322.393332	12585.16358	10340.2473	8788.757655	3181.448149	6490.654124	2577.06314	9624.629069
PS(20:0/20:3)	46539.05365	81873.9173	18263.69365	126140.8433	23123.09974	47612.78265	39927.45369	37452.65598	22033.15052	21881.94798	44032.16043	47066.3182	5321.398495	24836.19707	70471.37	24077.31101	10663.02501	26718.89105	47066.3182	19905.03179	34657.40188	31458.35296	2260.575937	46101.88574	28160.41199	26282.00188	30292.99785	16846.3097	27361.77363	34784.0704	36418.21138
PS(20:0/20:4)	96099.50627	135585.7657	90109.69416	214958.5216	129943.0299	130069.2949	156645.0475	107519.7551	193449.7237	47532.56874	116758.9195	94370.17438	34006.21779	80569.94663	142290.5853	107293.1272	24519.63954	143762.2647	94370.17438	74644.85108	89867.01629	85305.39195	4247.005844	95566.77093	115173.5035	109632.1583	64849.63333	62997.18388	44854.47297	106505.0751	98648.31161
PS(20:0/20:5)	4645.954864	11219.84314	1468.354852	11692.4665	17937.17902	5708.211658	11194.60022	5873.948685	10588.60366	850.1032673	2783.131667	10485.50245	875.0318321	1516.720244	4868.616587	3293.075524	0	1980.195682	10485.50245	1737.026111	5375.937504	0	0	3770.407437	1784.932732	0	3512.216931	2314.801324	584.9549343	0	1831.157728
PS(20:0/22:4)	8183.549246	6000.241646	4418.016527	14188.4524	7122.083455	8959.345948	8157.764768	9442.9106	8008.759893	1970.330249	8922.547185	3845.317866	2578.189818	4468.19353	7963.025397	5775.178646	550.2998968	3625.248256	3845.317866	3151.123715	4656.570903	3345.578384	0	4285.65045	5951.865266	7303.731221	3762.679518	2618.453944	2023.327212	6795.873023	8419.333493
PS(20:0/22:5)	3104.789364	10580.67719	3503.221295	16596.6381	14282.80901	10389.56345	10396.14661	7709.913525	7220.980687	3579.152726	16871.64278	10242.4336	1624.760115	6201.221042	14375.4677	9225.280894	3986.954222	6741.514364	10242.4336	2388.526833	5348.002247	3942.877959	549.9774186	5656.586233	8059.885274	10263.82141	3348.947693	4778.770717	6652.650483	5353.210542	13732.7325
PS(20:0/22:6)	19041.06967	38606.11505	19594.13723	50844.0919	38479.48848	20908.70871	28439.93628	18941.75709	18521.18354	17003.39562	20696.00558	22107.87601	3371.919418	16075.98138	28027.76032	15587.64566	4060.885165	38963.57794	22107.87601	20680.8072	7771.758352	24305.18524	1108.230673	33386.46595	17438.52659	7314.476898	10110.0104	8952.265786	4787.142212	7818.215122	13911.80507
27 OH cholesterol	1.49562152	0	0	3.400550638	2.579839966	0	0	0	7.793919862	0	2.161250515	0	0	0	0	0	0	2.604921181	0	2.522659823	0	0	0	0	2.361091504	2.037768604	0	0	0	0	0
Cholesterol	9971.991698	9934.233569	9952.657534	9963.620181	9965.453059	9943.557444	9904.421552	9941.80352	9892.161373	9942.328956	9945.055414	9929.256187	9967.059077	9969.774311	9901.906544	0	9919.478231	9966.079566	9953.633789	9966.837975	9950.712415	9933.446768	9948.011908	9923.795182	9940.239171	9957.902554	9969.964223	9942.920261	9946.762059	9972.334303	9965.667748
MAG 16:0	0	0	1.920113343	0	0	0	0	0	0	0	0	0	3.019609574	0	0	0	0	0	0	0	0	0	0	0	0	4.072482083	0	0	0	0	0
MAG 16:1	0	21.06862129	6.11885937	2.484830884	0.450466065	10.11357163	2.1139247	0	17.2952221	3.12758942	3.594371966	16.30032889	0	0	10.77399284	2023.06119	9.543809008	2.901016536	3.34681943	0	3.535984464	9.864523576	8.049821434	4.468808931	7.375673761	1.998645635	0	4.484062606	0	0	0
MAG 18:0	1.279756157	3.948990793	10.53619303	1.827693979	8.767283184	2.479735505	6.593560682	3.620537296	6.163282052	7.656533342	0	14.08670704	0	0	9.354805876	0	14.11027766	0	4.682377141	2.041919432	4.266040112	5.717974978	7.788754841	9.205855395	3.506251586	0.696024873	5.087301009	8.100096201	5.213446414	0	3.299479246
MAG 18:1	2.987615849	7.425862052	3.142395158	10.70880679	1.989285417	14.41612877	29.92704168	6.454390776	15.34227114	5.592521101	7.646930113	2.542372525	8.70275629	6.288103003	19.63101433	0	21.72457321	1.751339051	17.2413449	7.33073935	5.627385004	20.86738549	5.224901542	9.083308362	6.017374204	6.937750199	0	14.28593833	8.801451738	5.093852299	12.99878063
MAG 18:2	4.366435346	4.381903868	4.249898593	1.474980549	2.223197482	0	7.599501363	2.504071339	17.11465569	6.835299842	3.419025161	5.086711789	5.341871431	7.189979809	2.483610498	2433.706983	1.200280192	1.75930972	0	2.522556597	3.267820883	5.013518336	9.149046334	13.63432217	5.283696167	3.12854752	0	0	0	0	0
MAG 20:0	3.797592347	15.1006856	2.051464112	0	1.717535482	0	0	3.579249253	3.11848233	9.400271713	4.06994375	3.052629191	2.320265555	0	4.422393619	0	3.39542119	1.409112853	2.513379214	1.667666703	2.796887974	1.263052179	3.233985337	0	1.996482833	4.072224647	3.71072675	0	6.605632353	0	3.390030397
MAG 20:1	0	3.919713833	0.755521489	2.290472854	5.075400957	2.929836628	11.02914669	4.387293055	0	3.402332824	5.401556723	3.053205858	0	0	5.807099518	0	3.602269417	0	5.244763456	1.629512462	4.367336116	2.931699928	1.15547279	3.563216604	2.273120152	0	2.752428577	5.9772015	2.90602237	2.10063052	3.391809456
MAG 20:2	1.495161929	0	0	1.527397945	4.12391	2.080555681	2.565541707	2.585674376	5.191878714	3.455437538	2.092625177	3.281127706	0	3.915007722	1.196423042	0	6.92282126	1.682577584	0	3.315370236	2.380227638	2.327620668	3.057131189	0	2.314327175	3.05168305	2.426329487	2.990857631	0	0	3.39181029
MAG 20:3	2.989010929	5.730464082	1.723975555	0	1.213822968	2.102868826	8.869066252	5.322387512	9.746715668	1.728941456	7.46769742	0	3.019543228	3.452152965	6.580685337	0	0	1.737482428	1.793415651	0	4.010564415	2.09049392	0	3.654305365	0.699052481	0	1.364174144	5.528071038	3.710819228	4.75197851	2.664573513
MAG 20:4	2.225876006	0	3.280481367	0	0	0	0	0	3.505077851	0	0	3.426285043	0	0	4.838160386	942.5388092	0	1.536695728	0	2.522659787	5.8514057	0	0	3.480100142	0	0	0	0	7.125949793	0	0
MAG 22:0	1.351457873	0	2.124954316	1.799666126	0.638138618	2.103741063	2.244631793	2.557222326	6.201484078	0	1.548817808	5.183619149	3.019735441	0	5.349736088	0	3.470549802	1.364124653	6.252439488	0	0	0	0	9.048189262	3.535121879	2.034713479	4.94983988	0	7.425153257	0	0
MAG 22:1	0	0	0.752387304	0	0	3.153737591	5.00189732	7.749125301	0	0	6.378066812	0	0	0	7.389074316	0	2.430381191	3.642624014	0	1.680192688	0	2.447741883	4.234082312	0	2.361091349	0	3.710661785	2.988701853	8.82723953	0	0
MAG 22:2	0	0	0	1.526590137	2.579990281	0	3.35145119	3.852043509	7.795462552	0	0	0	0	0	0	823.2729371	2.353784959	3.381421014	0	2.465167357	6.784886633	3.893870171	1.902487333	3.654338789	5.583852385	0.487465247	1.901831545	4.484024788	0	1.948891052	2.044159707
MAG 22:3	1.804845787	0	0.953505851	3.051683944	0	1.706581886	3.355925652	0	0	0	0	2.56926642	0	0	4.726844397	0	3.642802915	0.754089623	0	0	2.349839647	1.043198162	0	0	0	2.114329444	0	0	0	0	0
MAG 22:4	1.481928851	0	0.901876229	0.783565792	0	3.153695719	0.624558858	3.873254419	0	1.694782746	2.161269113	0	0	0	2.950944855	1029.249533	0	1.735830879	2.474508653	1.593127101	0	2.120639526	0	0	2.401656724	1.986479038	0	5.03209265	0	0	0
MAG 22:5	0	0	0	3.968274718	3.188070284	6.260437364	2.580174048	2.584856567	4.76743835	1.685871616	0	4.469061776	0	4.187527462	0	1628.013575	3.370179881	0	2.817163188	3.870453625	0	3.893053135	0	3.302038418	2.359636605	2.632994961	1.901071543	3.208692573	0	3.202313706	0
MAG 22:6	0	0	1.632887583	0	0	0	3.357830574	0	0	1.728928758	0	2.590345132	3.019609504	0	0	0	0	0	0	0	0	0	2.870214279	5.363578421	0.926540133	2.037770133	0	0	0	0	0
S-1-P	0	0	0	0	0	0	0	0	0	0	4.322301028	0	0	0	0	0	0	1.737409312	0	0	0	0	0	0	0	2.344738619	0	0	0.184862223	0.433083166	0
Sphingosine	2.732998911	4.190189172	7.197952597	1.535304343	0	5.941665117	6.364195873	9.126374707	3.802736437	11.36253398	4.680730407	5.102152579	4.497532212	5.192917588	12.5886711	1120.156973	4.754618045	5.922479039	0	0	4.049206838	3.078459589	5.322194714	7.746756285	10.76585989	2.463828906	2.231411816	0	2.437364585	10.1349478	3.151608637
