# Supplementary material for: Plasma Lipidomics Profiling to Identify the Biomarkers of Diagnosis and Radiotherapy Response for Advanced Non-Small-Cell Lung Cancer Patients
Source: J Lipids. 2024 Jan 27;2024:6730504. doi: 10.1155/2024/6730504 (PMC10838201; doi:10.1155/2024/6730504)
Supplement: Supplementary Materials — The original data for all analyses in this manuscript are provided in the supplementary document, according to the corresponding subgroups. The corresponding subgroups can be obtained according to the supplementary file name. [file 6730504.f1.zip › Squamous cell carcinoma vs. adenocarcinoma patients in RT group.txt]

Sample	57	58	59	61	63	64	65	67	70	72	73	74	78	80	81	82	83	84	85	87	60	62	66	68	69	71	75	76	77	79	86
Group	Adenocarcinoma	Adenocarcinoma	Adenocarcinoma	Adenocarcinoma	Adenocarcinoma	Adenocarcinoma	Adenocarcinoma	Adenocarcinoma	Adenocarcinoma	Adenocarcinoma	Adenocarcinoma	Adenocarcinoma	Adenocarcinoma	Adenocarcinoma	Adenocarcinoma	Adenocarcinoma	Adenocarcinoma	Adenocarcinoma	Adenocarcinoma	Adenocarcinoma	Squamous carcinoma	Squamous carcinoma	Squamous carcinoma	Squamous carcinoma	Squamous carcinoma	Squamous carcinoma	Squamous carcinoma	Squamous carcinoma	Squamous carcinoma	Squamous carcinoma	Squamous carcinoma
FFA(14:0)	1082747.504	720446.8869	712231.457	1002084.272	768414.0541	287247.3255	690822.711	2237319.573	972907.5132	1442970.035	0	0	140941.7394	417209.754	837341.5884	287819.1925	1025647.961	1243163.096	492709.1522	2248152.494	368259.6151	1044978.365	779289.6216	916594.2262	1024380.243	1199096.519	0	401530.1811	607953.9646	237225.7148	0
FFA(14:1)	490626.3793	510812.4985	1059209.772	693021.8818	593506.4224	602965.2047	1083257.743	817034.1519	732032.1964	836103.3776	0	0	517775.8391	659062.5337	634563.8599	435994.064	515821.4801	528555.0598	798275.5179	674910.042	1641163.344	743863.7966	391979.131	518811.0626	807609.9302	689805.0929	0	722436.7095	779079.4103	565921.4014	0
FFA(16:0)	11576427.14	14546107.79	14088662.41	5695313.541	5768575.349	6025320.563	15360406.26	15286300.91	6857759.267	21439232.55	0	0	4396242.42	8730636.524	16836708.93	5138577.712	5094113.825	9743464.233	6846582.953	23043903.17	4223536.485	13951499.08	7344914.832	4716593.841	9970040.649	5133584.953	0	10320786.57	11693797.39	7095100.274	0
FFA(16:1)	631634.4604	1258667.552	809118.777	156438.375	194378.9288	1112883.333	1428027.142	3374316.781	457261.564	3586309.276	0	0	356625.2909	1495249.553	5250637.924	956535.0263	249292.8876	411828.4291	527646.7431	2795892.02	78665.07151	896817.8893	1118862.728	104185.3684	588058.777	1341066.801	0	1286822.049	1431793.679	1002754.6	0
FFA(16:2)	298664.3286	314478.5398	722157.896	368891.3567	215513.6218	368699.9288	453676.2325	372204.7549	346356.4121	282506.9515	0	0	272312.5508	209926.1974	298442.536	231461.7994	359338.554	358876.9747	300724.5618	346835.3857	335491.303	728545.7234	363571.651	91799.10914	383170.8769	738219.101	0	420709.4681	198492.6899	324764.4335	0
FFA(18:0)	8254586.994	11847260.36	8442192.018	3928612.617	3507866.427	7862581.407	8169567.91	7267144.703	4098171.805	9553089.155	0	0	4511762.152	8000841.531	9674566.008	5737966.721	8834580.126	5962124.518	5547829.026	11462528.17	3804376.94	9277808.613	8043037.468	6142256.223	6347845.514	4936854.897	0	9574360.51	8864213.643	5451246.562	0
FFA(18:1)	20178494.02	44924411.67	31066696.84	9254260.946	8183063.045	18023214.18	22617078.91	34773361.07	18299100.17	50616234.38	0	0	13290732.97	23953509.28	51332748.64	22355577.57	12494801.95	4895976.386	15348182.77	41985693.32	6222336.794	21788848.71	26833176.84	6035769.168	21056966.31	4932361.003	0	27624294.25	28976306.83	21013787.73	0
FFA(18:2)	14796058.47	22456271.43	14862271.14	5974559.501	4424555.315	10380206.81	13007106.35	14044434.27	9166314.472	37566465.36	0	0	9172864.924	13837789.6	29157616.7	11613540.83	6431376.503	4201719.577	11470468.65	25874850.37	5936119.222	14027347.19	14875317.99	3807143.21	15870603.37	4187533.707	0	14970071.69	15260341.52	11016630.17	0
FFA(18:3)	1442723.325	778933.2948	614651.4144	591459.4863	360574.4588	649724.7274	743237.0914	640887.6842	371413.2135	1740667.321	0	0	605512.2655	712869.8059	1514294.287	616172.4676	434731.1272	587112.1249	631531.6344	1257311.063	270371.0557	749029.4955	1195175.083	195503.0942	1110006.27	231482.8049	0	690465.0856	889832.994	417750.8291	0
FFA(20:0)	1537331.079	1838814.476	1859435.807	2701339.34	1525318.455	1952611.083	2179033.835	757355.4221	2086835.199	1674059.378	0	0	1090484.558	1575853.096	3312879.444	1317341.31	3203687.589	1166141.342	456712.7473	482204.5365	1903807.441	1986775.745	1576768.696	2063791.205	2012312.855	2049749.673	0	1156282.514	2412748.985	1457251.808	0
FFA(20:1)	393034.1904	1530406.781	989443.7763	284169.7296	174613.6988	518086.9526	325115.5915	616247.5548	301203.6884	1011684.657	0	0	225893.2275	447867.4552	1031830.241	457480.356	433926.9165	560924.0867	218291.257	895438.5635	155812.5956	543262.1942	761321.5455	342654.1663	746440.302	338539.1826	0	442168.6945	512933.4396	378195.6737	0
FFA(20:2)	378320.9985	897852.4939	388867.2695	137949.8102	141108.8635	412940.7848	325059.1496	480899.7976	214032.3588	839875.6458	0	0	257671.682	429950.3425	795471.3499	346374.8849	223709.5079	79047.4235	257943.9948	569959.8283	201440.1536	340496.8288	495584.9191	192334.2344	308250.4729	142491.2002	0	375211.4368	554065.7622	328610.9607	0
FFA(20:3)	376313.6416	948297.9512	443128.3391	269179.7542	302834.2424	919758.6633	449942.9782	398951.1159	309743.402	812918.8196	0	0	335875.8676	456055.7081	916876.241	342756.788	582990.9918	379324.3887	361156.3852	637619.4926	359412.7608	354014.1499	484789.2919	544200.9305	377092.4752	382294.7449	0	368997.7064	643077.2266	346467.6704	0
FFA(20:4)	553282.052	1944766.679	482675.4311	383275.6219	472701.4166	1309055.152	920199.3965	1415841.638	554665.5417	1072102.497	0	0	653087.445	1028332.51	1274702.264	476289.4457	447411.8229	237076.7961	468885.2537	1020244.131	353820.0488	428266.757	640975.3842	447515.6427	457546.3036	371989.3977	0	772898.1565	1304365.357	904288.5859	0
FFA(20:5)	168635.9814	202874.8671	224787.6154	292598.5241	205828.5958	123487.0572	222343.2251	243695.4601	230645.5793	200961.8896	0	0	442228.8985	309298.068	664196.7083	343038.3685	634827.8662	343866.2769	3199987.868	260891.683	255159.2333	204024.4317	707180.8194	618560.3608	176922.6244	228231.6937	0	356284.3707	1490541.374	307421.7802	0
FFA(22:4)	195622.3655	982956.1799	277645.2871	115621.9129	71656.27965	697625.3639	324703.3737	507210.0363	203746.4256	640039.1248	0	0	181368.6135	330884.1502	559313.4452	210577.5615	187127.3399	54857.79727	99289.585	341384.558	128903.7932	217622.9479	441644.3162	144294.2828	203546.0596	84174.28282	0	194503.4541	379361.0194	331204.2954	0
FFA(22:5)	197902.6125	618582.8701	329765.2375	347987.2064	99524.71171	442792.3563	320368.7027	242754.8758	200445.3344	702951.047	0	0	198406.2502	222070.9167	339095.2171	177795.4775	132851.046	59085.87263	105180.8549	437418.1136	67141.86854	114723.3008	337138.3062	95470.53048	150639.286	112227.0469	0	224123.273	365008.8961	191891.6532	0
FFA(22:6)	205449.3208	364422.8473	225031.0453	113777.8644	210232.6253	297622.1168	240126.2657	219965.2338	280037.2047	572666.9042	0	0	211479.6361	240975.4715	342224.5123	138558.6079	174530.0492	103432.3335	143229.8629	736144.4023	66776.56457	151898.6612	451455.0615	160804.0728	172117.3204	38053.13955	0	276448.8058	390751.5843	185166.7216	0
FFA(24:0)	1720215.122	27433622.02	14297119.76	15161598.6	1221581.498	6672369.37	24681968.24	15041708.52	2542596.066	961236.1954	0	0	21336831.99	4057251.891	30156300.76	679918.43	3042801.11	10546983.1	3823393.831	12135071.4	5760320.956	3171204.462	1495451.356	2054134.107	4976757.57	1853644.033	0	4492667.521	17610646.81	18890364.19	0
FFA(24:1)	149397.1752	918706.3901	517415.2802	142441.3622	68422.64646	499345.3498	89927.5061	227888.7485	157376.8754	456247.571	0	0	143325.0394	259337.3935	366609.2593	173003.8522	823609.6314	139121.7519	73142.96225	221836.8109	180022.3186	288714.0543	430858.3641	481913.1923	277297.4067	43415.72032	0	146302.0006	169037.8408	177217.1865	0
LPA(14:0)	0	0	0	0	0	0	0	0	346.9782041	0	0	0	0	0	0	0	0	0	0	0	0	0	0	0	0	0	0	0	0	0	0
LPA(16:0)	1579.010458	1988.311496	1031.739063	1346.338677	923.7168015	3528.920224	1447.937836	1522.37118	1360.832798	2348.277289	952.5938309	648.1414484	0	0	1254.045812	0	1242.7521	2857.354057	2470.079465	893.1810624	2985.827047	968.0114525	1283.636357	0	2172.350568	3314.521194	0	0	1082.654529	0	1200.866228
LPA(16:1)	0	0	394.3789646	0	0	0	0	0	0	0	0	0	559.072755	0	0	0	0	0	0	0	0	0	0	0	0	0	0	0	0	0	0
LPA(18:0)	850.5085724	0	0	0	608.7659333	0	0	0	1131.231715	1020.476524	696.7237589	0	0	447.4764213	0	0	622.8373063	1730.079359	0	0	0	0	0	0	513.9337174	416.7976039	910.3963031	451.0632522	723.4396691	0	500.5259903
LPA(18:1)	0	617.0934494	0	616.0930074	0	0	0	0	0	0	0	447.2266462	618.9754852	0	617.6258809	0	617.0429158	0	0	0	0	0	0	0	0	0	0	0	0	0	0
LPA(18:2)	0	0	0	0	495.4890048	0	0	0	0	0	0	0	0	0	0	0	594.3785767	0	0	0	0	0	0	0	0	652.3550491	0	0	0	0	495.7354301
LPA(18:3)	0	0	0	0	0	313.5795	0	0	0	0	0	0	0	0	0	0	0	0	0	0	0	0	0	0	0	0	0	0	0	0	0
LPA(20:0)	0	0	0	0	0	423.0759644	0	0	0	0	0	0	0	0	0	0	0	0	0	0	0	0	0	0	0	0	0	0	0	0	0
LPA(20:1)	0	0	0	0	0	0	0	0	0	0	0	0	0	0	0	0	0	0	0	0	0	0	0	423.4278173	0	0	0	0	0	0	0
LPA(20:2)	0	0	0	0	0	0	0	0	0	0	0	0	0	0	0	0	0	0	0	0	0	0	317.3069394	0	0	0	0	0	0	0	0
LPA(20:3)	0	0	0	0	0	0	0	0	0	0	0	0	0	0	0	0	0	0	0	0	0	0	0	0	0	0	396.2952568	0	0	0	396.0097368
LPA(20:4)	0	0	0	0	0	0	0	0	0	0	0	0	0	0	0	0	0	0	0	403.1343843	0	0	519.4049803	0	618.9597266	0	0	706.2389714	0	0	0
LPA(20:5)	0	0	0	0	0	0	0	0	0	0	0	0	0	0	0	0	0	0	0	0	0	0	0	0	317.3060502	0	0	0	0	0	0
LPG(14:0)	0	0	350.1163948	580.9003817	0	498.7507418	344.6354927	0	0	0	457.0399099	247.6954051	0	0	0	352.1030147	479.7255326	0	0	0	0	0	355.6206353	0	0	0	799.3861266	627.8351913	0	455.9087752	338.4977475
LPG(16:0)	2227.408025	1465.267699	3753.008359	2736.574655	779.4692958	1620.121657	4390.541146	2053.744344	2637.831787	2733.491633	9252.879402	8689.164928	2486.582758	1166.678033	2720.119291	1296.958917	825.2712959	6705.702291	926.818362	2532.607549	2760.215937	2554.088364	1313.004282	529.7353781	930.6513176	4394.446945	2674.755381	948.9613199	2038.946363	0	5672.820976
LPG(16:1)	510.1660868	278.9827209	522.9001798	655.9427023	333.7176591	437.3089941	337.4254128	354.9936146	445.0707016	0	1736.366038	626.4393529	476.0454887	332.8399235	478.9953146	565.3797178	487.6488038	306.2458	556.3522152	588.5233719	777.6077127	223.3088863	0	327.7159298	779.8750698	403.2898083	0	245.2848364	330.8584307	336.8464628	425.3179774
LPG(18:0)	2604.537	4007.465731	3444.198505	6647.028357	4772.950582	2277.256793	4031.498449	3268.931795	5148.961212	4430.130568	8996.841928	3884.320325	4369.020767	2901.87839	3895.716765	2544.821795	3865.127373	3305.390181	1817.867668	6686.623351	3344.575833	4836.124271	5024.088111	3350.700924	4939.220906	3280.427263	2152.50056	3305.310515	3927.205774	1644.526524	3283.081449
LPG(18:1)	6952.691158	8681.142947	9919.883816	23936.25673	8794.628063	20237.97106	7212.725614	22578.09188	16557.27257	15611.71226	16629.68373	11307.13512	9078.233323	14553.99229	22301.6767	9925.660942	25739.25344	23568.46931	9894.520961	21747.3134	20542.87822	17400.05382	11103.50452	9175.968875	15377.6599	11177.5757	8279.789737	15838.19859	14985.40066	10782.14058	13845.59405
LPG(18:2)	4824.299377	9907.494788	2971.88358	11722.20872	5520.538307	9324.884881	9030.956711	5548.071332	9833.148197	5284.137188	5975.067147	11164.664	5925.386513	5935.563902	10338.30583	2247.678341	9683.982312	9829.735855	5295.823969	6093.245868	11002.2408	7116.935652	9658.184611	4568.706938	8994.467376	7296.568584	8162.61076	7380.292829	7632.166911	6414.532081	5933.233089
LPG(18:3)	882.3798948	625.9228322	0	491.5892917	0	241.3077208	802.6039916	214.4650216	0	514.0983587	1116.057156	488.5980143	301.5665874	0	0	0	1003.231993	867.8405139	1004.747625	0	1113.517999	369.7905604	1333.141077	229.0759875	611.2207208	685.0217208	412.6490287	1035.881486	440.4479425	398.4009844	0
LPG(20:0)	462.5522072	285.1968197	0	171.9490707	412.7870541	374.6891909	463.1468341	310.9359195	571.8893316	0	545.7795504	827.1647155	431.9393359	0	396.8328759	288.1063245	393.4765787	465.4361803	188.6240601	292.306495	257.0053427	0	287.2408992	0	0	604.448051	461.4058872	0	425.8920204	261.8585686	526.8690265
LPG(20:1)	912.3390586	0	0	0	0	0	0	0	0	0	288.0116916	311.4220692	0	0	0	0	1046.490887	0	0	0	0	0	1015.601185	0	0	799.267336	817.1109695	0	0	0	394.3015853
LPG(20:2)	949.0672959	777.8100789	1126.887421	449.3693148	273.155761	545.8543214	1397.723155	567.6663821	843.1827692	1028.23149	952.2267279	897.393397	0	0	1155.301073	122.0843356	504.9098202	741.4940257	856.4123837	737.3986955	2204.009302	261.422232	723.564997	1003.758142	884.057891	530.3375134	769.886229	843.5616647	424.5511422	0	0
LPG(20:3)	824.6746466	1119.774779	698.1411279	1050.453461	0	0	1004.511474	290.7132644	538.0850064	0	679.3907825	957.4267889	689.8532012	633.0142485	0	0	730.1921926	573.1870866	494.367699	213.1055703	1234.503734	0	405.5549852	382.7799287	239.5181583	686.3834721	664.3475913	625.8530512	211.7022021	871.5954258	1195.192988
LPG(20:4)	337.6625663	869.4059047	610.364353	0	563.5091296	2115.422537	0	391.6583418	774.7743183	551.5851696	0	978.1606728	0	414.9047024	679.8517081	322.2722343	549.2584118	336.4220252	0	963.4539252	1436.419767	503.4875886	0	247.8960445	597.2510724	838.5002901	441.7376611	565.9975949	0	0	0
LPG(20:5)	400.1014318	309.3015701	266.03348	1131.644594	482.803532	0	686.4655908	257.4489761	619.2007705	271.1211234	989.4021201	570.5786956	230.3855135	363.5383564	313.6839277	791.2533718	299.1189802	253.1354759	405.2773067	277.0645759	320.6086797	266.2923257	393.0232524	1161.291219	396.6417856	417.4012511	779.8868971	298.2835662	444.5330977	381.3255772	383.050464
LPG(22:4)	259.944904	721.9117072	315.1756426	674.5234627	428.8220793	997.8253309	625.840755	371.8386611	636.3047436	506.416205	346.1313164	329.8531247	270.5265085	791.0974762	0	423.3795147	518.9446699	0	574.999238	223.0367532	973.5211512	416.6975846	512.5347246	556.0684894	0	649.4939287	773.2186891	0	163.402894	449.4182876	386.7837462
LPG(22:5)	660.2809071	867.957163	1664.969647	0	658.1219008	739.0659786	674.6120003	335.3665681	798.8432771	432.9089152	724.0477354	362.6593397	424.1963943	0	411.944957	0	1168.017839	717.5967896	402.4802941	822.9247021	536.0046293	716.2354326	612.1054859	799.74392	765.0599951	553.3158373	484.0145325	392.8228251	592.3142306	267.4195384	0
LPG(22:6)	346.0955816	352.3121943	704.1225465	518.2815887	351.8032521	477.6103566	0	714.9242419	474.0265055	496.4183239	842.878387	0	390.1935988	378.4466965	383.0903147	735.1879441	390.0377523	487.776324	416.5877857	0	349.3091769	1046.309113	901.4574183	0	471.9652632	488.4715735	595.3108233	450.7247414	0	275.2612939	0
LPI(14:0)	0	0	0	0	0	0	0	0	0	0	0	0	0	0	0	0	0	0	0	0	0	0	0	0	0	0	0	0	0	0	0
LPI(16:0)	665.3360729	0	0	0	0	0	0	0	0	497.2475869	1980.688254	562.756597	0	0	0	0	0	962.4176426	0	0	0	0	0	0	0	0	1775.645241	0	0	0	1348.366349
LPI(16:1)	0	0	0	0	0	0	0	0	0	0	0	0	0	0	0	0	0	0	0	476.7713719	315.5782473	0	0	0	0	0	0	0	0	0	0
LPI(18:0)	0	0	0	0	0	0	0	0	0	0	0	0	0	0	0	0	0	0	0	0	0	0	0	0	0	0	0	0	0	0	0
LPI(18:1)	0	0	0	0	0	0	0	0	0	0	0	0	0	0	0	0	0	0	0	0	415.0284636	0	0	0	0	0	0	0	0	0	0
LPI(18:2)	0	0	0	0	0	0	0	0	0	0	0	580.8714023	0	0	0	0	0	0	0	0	0	0	0	0	0	441.9290532	417.4027363	0	0	0	0
LPI(18:3)	0	0	0	0	0	0	0	0	0	0	0	0	0	0	0	0	0	0	0	512.1898416	0	0	0	0	0	0	0	408.8573965	0	0	395.2666538
LPI(20:0)	0	0	0	0	0	0	0	0	0	0	0	306.7712411	0	0	0	0	0	0	0	0	0	0	0	0	0	0	409.1047006	0	0	0	409.032
LPI(20:1)	0	0	0	0	0	0	0	0	0	0	0	0	0	0	0	0	0	0	0	0	0	0	0	0	0	0	0	0	0	0	306.6096058
LPI(20:2)	0	0	0	0	0	0	0	0	0	0	817.8084462	0	0	0	0	0	0	0	0	0	0	0	0	0	0	0	0	0	0	0	0
LPI(20:3)	0	0	0	0	0	0	0	0	0	0	309.8387688	0	0	0	0	0	0	0	0	0	0	0	0	0	0	0	614.7329352	0	0	0	0
LPI(20:4)	0	0	0	0	0	0	0	0	0	0	0	0	0	0	0	0	0	0	0	0	0	0	0	0	0	0	0	0	0	0	0
LPI(20:5)	0	0	0	0	0	0	0	0	0	682.4188126	0	0	0	0	0	0	0	0	0	0	0	482.3960283	0	0	0	0	0	0	0	0	0
LPI(22:4)	0	0	0	0	0	0	0	0	0	0	0	0	0	0	0	0	0	0	0	0	0	0	0	0	0	0	0	0	0	0	0
LPI(22:5)	0	0	0	0	0	0	0	0	0	0	0	0	0	0	0	0	0	0	0	0	0	0	0	0	0	0	307.6313923	0	0	0	0
LPI(22:6)	0	0	0	0	0	0	0	0	0	0	0	0	0	0	0	0	0	0	0	0	0	0	0	317.2188118	0	0	0	0	0	0	0
LPS(14:0)	0	0	0	0	0	0	0	0	0	0	907.7767036	500.0508348	0	0	0	0	0	0	0	0	0	0	0	0	470.3730907	0	0	0	0	0	400.66
LPS(16:0)	1386.020513	1733.815121	918.4469855	2552.195616	2265.295557	2079.930826	2188.300868	1653.531545	1668.496779	1297.969536	0	420.0121005	1060.461971	1065.581988	1405.214812	1413.90427	1389.634844	3632.036386	1268.285109	2043.140525	1752.46992	1795.483425	1881.332604	0	1278.680881	2475.849286	0	0	0	0	437.787534
LPS(16:1)	0	0	0	0	0	0	0	0	0	0	0	0	0	0	0	0	688.364113	0	0	0	0	0	0	0	0	0	0	0	0	0	0
LPS(18:0)	688.4925342	0	0	1032.024483	1352.022223	525.7138251	491.0063	0	0	0	0	680.7746975	929.8285212	0	1155.041268	0	841.0585816	0	833.49	777.4332641	831.2231973	687.8529531	630.7180301	0	935.1674644	1278.209277	0	0	0	0	1130.64324
LPS(18:1)	0	908.9340632	0	697.0806264	0	505.8167742	0	0	0	0	568.8839508	0	814.2254784	0	0	0	811.4470863	0	0	917.6838415	0	985.2509829	0	0	1044.927358	982.093394	382.7062018	0	0	0	0
LPS(18:2)	0	0	0	641.3788252	0	0	0	0	0	768.9460931	341.5402268	0	555.0777839	0	457.6883488	0	1831.978756	1060.406975	0	0	0	0	0	0	1282.088057	0	0	0	371.3582044	0	0
LPS(18:3)	0	0	0	0	0	0	0	0	0	0	0	0	0	0	0	0	0	0	0	0	0	0	0	0	0	0	0	0	0	0	0
LPS(20:0)	0	0	0	0	0	0	0	0	0	0	406.4765557	0	0	0	0	0	0	0	0	0	0	0	0	0	0	0	0	0	0	0	0
LPS(20:1)	0	0	0	0	0	0	0	0	0	0	0	0	410.5480855	0	0	0	0	0	0	0	0	0	0	0	0	0	0	0	0	0	0
LPS(20:2)	0	0	0	0	0	0	0	0	0	0	0	0	0	0	0	0	0	0	0	0	0	0	0	0	0	0	0	0	0	0	0
LPS(20:3)	0	0	0	0	0	0	0	0	0	0	0	0	0	0	0	0	0	0	0	0	0	0	0	0	0	0	0	0	0	0	508.284326
LPS(20:4)	0	0	0	0	0	0	0	0	0	0	0	0	0	0	0	0	0	0	0	0	0	0	0	0	0	0	0	0	0	0	0
LPS(20:5)	0	0	0	0	0	0	0	0	0	0	0	0	0	0	0	0	0	0	0	0	0	0	0	0	0	0	0	0	0	0	406.8512104
LPS(22:4)	0	0	0	0	0	0	0	0	0	0	0	315.8449346	0	0	423.8634493	0	0	0	0	0	0	0	0	0	0	0	0	0	0	0	0
LPS(22:5)	0	0	0	0	0	0	0	0	0	0	0	0	0	0	0	0	0	0	0	0	0	0	0	0	0	0	0	0	0	0	0
LPS(22:6)	0	0	0	0	0	0	0	0	0	0	305.0405724	0	0	0	0	0	0	0	0	0	0	0	0	0	0	0	0	0	0	0	0
PA(14:0/14:0)	0	0	0	0	0	0	1034.726234	0	0	0	0	0	0	0	1011.855596	0	0	0	0	0	0	0	0	0	1044.906285	0	0	0	0	0	1630.091797
PA(14:0/18:1)	0	0	0	1388.645208	1174.596308	0	0	2031.779583	1000.749828	0	0	0	0	0	0	1025.177882	1517.916611	1013.790768	0	0	0	0	0	0	0	0	1575.503478	0	0	0	545.761667
PA(14:0/18:2)	0	0	0	0	0	0	0	0	1083.897504	0	0	0	0	0	0	0	379.304033	0	212.7738383	0	1371.638556	0	0	0	477.8272193	0	1058.364158	0	0	0	1072.95962
PA(14:0/18:3)	0	0	0	245.9259527	333.6101781	0	391.0951663	519.6451838	769.9908593	340.4359675	0	0	0	0	497.5365556	280.5816978	907.8903678	0	0	0	811.1268555	225.1929041	0	577.3906759	0	291.5449389	1057.087675	0	489.4135597	0	0
PA(14:0/20:1)	0	0	0	230.3467078	0	0	0	0	512.2384126	630.26193	0	0	0	0	0	0	0	0	0	1472.406328	490.6931123	333.1473505	0	0	0	0	0	0	0	0	1085.37264
PA(14:0/20:2)	0	0	0	1051.554158	0	0	0	0	0	0	0	1046.328209	0	0	0	1533.791661	0	1044.170663	0	561.4632631	915.6609473	0	0	0	0	0	1085.453753	0	0	0	943.7154861
PA(14:0/20:3)	0	0	935.1082435	0	2070.348521	0	0	0	0	0	0	0	0	0	0	0	0	881.2356513	0	0	0	0	0	0	0	0	0	0	0	0	0
PA(14:0/20:4)	0	0	0	0	0	1036.189342	0	0	0	0	0	0	0	0	0	0	0	0	0	0	0	0	0	0	0	972.2731709	0	0	0	0	1045.215487
PA(14:0/20:5)	0	0	0	843.9442707	0	0	0	1568.200398	0	0	0	0	0	0	0	704.6099914	0	816.2007228	0	0	0	0	0	0	0	0	0	0	0	0	0
PA(14:0/22:4)	0	0	0	0	0	0	0	0	0	0	0	0	0	0	0	0	0	0	0	0	0	0	0	0	0	0	0	0	0	0	0
PA(14:0/22:5)	0	0	0	0	869.386473	0	1128.894657	0	243.1804413	0	1083.188831	0	949.4975042	0	0	504.4987568	387.9350226	0	960.0595156	216.4303212	0	0	370.5353004	0	0	0	0	0	0	0	0
PA(14:0/22:6)	0	727.2440269	707.2226464	0	0	0	0	0	0	1189.629734	0	1094.251692	0	0	0	0	0	0	0	0	1037.251558	0	0	0	0	0	0	0	0	0	0
PA(16:0/14:0)	0	0	0	0	0	0	0	0	0	987.6543145	1611.665105	1600.988464	0	0	0	0	0	0	0	1242.046883	0	0	0	0	0	1447.927169	0	0	0	0	0
PA(16:0/16:0)	0	0	2510.257127	0	0	1542.896675	967.3255314	0	1598.111055	2056.910337	0	2102.131502	0	0	0	0	1553.480901	0	1000.556232	0	0	0	0	0	0	0	2708.17818	0	0	0	1079.438652
PA(16:0/16:1)	0	0	1491.083072	0	0	0	0	0	0	0	0	0	0	1264.223478	0	0	1102.894179	0	0	0	0	0	0	0	0	0	0	0	0	1149.572258	0
PA(16:0/18:0)	2505.2552	0	0	0	0	0	0	0	0	0	2629.045422	1365.7484	0	0	0	1004.644801	0	0	0	0	0	0	0	0	0	0	1565.437125	0	0	0	1071.34336
PA(16:0/18:1)	0	5015.481713	0	854.8957736	1068.432302	6260.34664	0	0	0	5660.615481	1024.50223	3647.587097	0	1166.07756	3075.627892	872.6271785	1148.313818	0	1181.788216	1661.701541	0	655.5502061	0	1147.719962	0	0	2096.242035	2061.292853	1169.01842	0	0
PA(16:0/18:2)	1573.492116	0	1534.859451	0	0	1041.039275	0	0	1018.629848	0	1500.467947	0	0	0	1009.935442	0	0	1004.697394	1488.370166	999.3418112	0	1324.112263	1572.744417	1087.919329	1412.724357	0	1629.863959	1551.041993	0	0	0
PA(16:0/18:3)	0	0	0	0	0	0	0	0	0	988.5665436	0	0	0	0	0	0	0	0	0	1278.03529	0	0	0	1172.027547	0	0	0	0	0	0	0
PA(16:0/20:1)	0	0	0	0	1303.427995	0	0	0	0	0	0	0	0	0	0	0	0	0	0	937.1307246	0	0	0	0	0	0	0	0	0	0	0
PA(16:0/20:2)	1030.313871	0	0	0	0	0	0	0	0	0	0	0	0	0	0	0	0	0	0	0	969.5387359	0	0	0	0	0	0	0	0	0	0
PA(16:0/20:3)	0	1004.438843	0	0	0	1042.952979	0	0	0	0	0	0	0	0	0	0	0	0	0	0	0	0	0	0	0	868.927421	1075.214731	0	0	0	0
PA(16:0/20:4)	0	0	0	0	1568.936376	0	0	0	0	0	0	3132.190413	0	0	1560.097559	1576.418413	0	562.1808215	1358.262448	0	0	868.1827439	0	0	1051.730457	0	1065.647653	0	0	0	1041.897981
PA(16:0/20:5)	0	1567.453187	0	0	0	1044.847949	0	0	0	1047.143561	1068.961012	0	0	0	0	0	0	0	0	1003.443394	0	0	0	0	0	0	0	0	0	0	0
PA(16:0/22:4)	0	1054.408396	0	0	0	0	0	0	0	0	1094.331172	0	1039.581935	0	0	0	0	0	0	0	0	0	0	0	0	0	0	0	1058.52125	0	0
PA(16:0/22:5)	0	0	0	0	0	0	0	0	1053.52509	0	0	0	0	0	1035.47959	0	0	0	0	0	0	1566.364135	0	0	0	0	0	0	0	0	1562.996121
PA(16:0/22:6)	0	0	0	0	0	1563.080206	0	0	0	0	0	0	0	0	0	0	0	0	0	0	0	0	1040.438401	0	0	1037.58566	0	0	0	0	1042.72861
PA(18:0/14:0)	0	0	0	0	1020.21817	0	0	0	0	0	0	0	0	0	0	0	0	0	0	0	0	0	0	0	1053.443701	0	0	0	0	0	0
PA(18:0/16:1)	1540.923358	2578.627714	3059.807143	5269.869813	4847.946885	4784.758903	8193.669733	4112.189176	4552.396101	1840.557215	4695.295566	1047.334268	0	2492.78982	2019.1708	1018.572607	2019.508663	1511.989921	1494.700528	1495.660573	1893.335526	2561.526312	3016.022682	6547.637043	1520.261746	3949.393576	2097.203292	0	0	3435.153125	1558.834448
PA(18:0/18:0)	2055.7673	3295.835432	3605.005843	1511.08743	4627.979182	3811.246828	1513.637304	1543.940778	2020.903138	0	3125.092865	1007.987274	0	2000.24584	2028.30527	0	8638.449041	2562.984627	1471.58986	0	4508.043109	2123.867038	4072.619237	2025.178034	3806.658067	4640.456416	490.7524673	2465.006117	0	3491.506868	0
PA(18:0/18:1)	48843.63835	101499.3156	104376.2575	100705.6923	247245.3365	177230.4623	87675.91015	70509.49798	66872.65157	85025.5219	122057.6159	162252.9846	38307.22805	69485.1712	105336.2086	52062.63917	158146.7295	84276.40173	104020.8956	70085.91112	163997.6473	132333.168	118678.1172	85787.53294	109022.6944	159875.543	80950.25439	62551.64444	37408.887	61052.81775	66361.2906
PA(18:0/18:2)	162764.2432	167042.6052	140689.0223	147452.8616	488962.2585	454834.9815	168603.2187	34543.53282	102400.9343	146153.6806	252702.7276	474200.0008	95420.65261	80888.8748	179997.0368	147931.1179	422784.1672	337718.2146	342892.732	146682.9614	375177.471	191715.2316	354000.7106	198995.824	309374.3513	446328.9174	173384.5336	159339.3159	66017.23738	47652.79069	131837.939
PA(18:0/18:3)	1838.561609	4299.078547	2212.927346	2526.526477	5873.997785	5046.916541	2538.855375	0	1008.763642	0	5793.363179	2796.947084	4291.014423	1994.01986	2037.234222	1491.129826	3033.586017	9667.869728	4483.550717	1494.994269	6577.863716	3603.34706	1012.20718	1008.948964	2632.793372	7353.080184	4198.376396	2998.547103	0	1992.998751	948.9914573
PA(18:0/20:0)	1408.353174	0	2581.312698	7425.180941	3881.502909	0	3027.464675	0	1529.21461	2068.65942	3946.927688	8055.016443	0	1042.113971	3530.889846	1533.284085	5753.783872	3973.775781	2381.549362	3093.494186	3046.879703	3102.913513	0	0	2360.235592	2878.51377	1950.984275	0	1015.304531	0	1457.526895
PA(18:0/20:1)	0	6115.563421	1768.201354	0	4386.367337	5105.658177	924.1575404	2575.590228	1523.132579	4141.926308	3136.392727	5750.941552	2504.746657	1008.370921	2063.541165	1521.876561	2062.349014	0	2044.4426	2512.586571	5082.701387	4124.230158	2548.100549	6736.318943	2309.767051	8248.342771	5750.570022	4517.071322	2008.525425	0	1041.531294
PA(18:0/20:2)	1549.453721	6111.115249	1934.112895	1976.333285	6580.445713	14789.40599	3983.517005	0	2033.486382	4652.495575	1444.010697	4312.218783	1006.028431	2505.764265	3600.029749	2018.985411	5640.223116	2556.714257	10145.95144	2506.054916	1476.75217	2552.621742	7208.464143	1436.655661	1321.031184	5492.931798	2611.063536	1495.095728	995.1683725	2557.94175	1536.730494
PA(18:0/20:3)	31568.25788	89810.16787	57503.40315	35128.07708	129656.5746	137138.5927	68653.27642	11951.65044	38136.8043	40780.93036	118619.6255	81950.0335	20400.93189	24147.38543	53760.06255	22503.30709	76554.19505	43284.70169	107098.5873	41916.58491	92583.41953	73465.22424	83808.93797	50310.99482	48940.39527	95788.60786	38617.46826	42954.05453	27204.73289	25527.16573	44165.47482
PA(18:0/20:4)	258681.9966	728155.4345	607696.3952	412743.3613	1458900.082	1194936.803	861050.5763	440073.9407	479528.6838	281409.5273	810759.5842	757005.1542	275281.7425	433539.6432	694951.4012	253126.6524	657045.1882	576233.2562	666847.9484	397093.0118	915418.7654	740071.6524	593667.3306	525774.7513	636092.4809	1007453.411	409704.5722	522879.432	267814.7936	373353.3595	673128.0812
PA(18:0/20:5)	8810.905135	21875.21288	11941.82896	6708.499908	21689.87603	36439.93576	26451.42339	0	12409.47503	9345.254958	22721.22959	6251.146579	2053.613423	2570.067858	6749.486705	3829.670953	15952.89241	14463.22573	8702.507012	18386.62278	11889.21341	10379.67631	23431.5943	18227.07266	5732.172873	5046.493874	6489.582122	8213.472118	5146.18366	1013.548519	4539.766337
PA(18:0/22:4)	55572.83364	171359.749	238234.0372	117102.9843	304803.9589	271333.957	98852.13398	238934.5818	91577.78382	72803.21685	124036.2412	221693.2129	56245.7516	174579.3912	176753.6131	37231.29916	92554.56486	52408.14984	91150.21	71555.89952	290348.5859	220913.8991	117742.5869	58628.19073	148432.6331	292666.0231	128395.9692	117412.1263	66486.42917	136111.7432	169151.4541
PA(18:0/22:5)	51815.10998	122144.7532	75462.48091	73739.42623	179403.8105	186766.5766	142277.579	53226.55595	61768.39571	66560.64509	150391.9135	159155.0633	32932.68267	68367.21634	77896.79758	41934.39599	82894.29071	71900.1168	73416.21672	64320.24362	181389.2585	100810.6008	108707.3407	74492.01202	102073.8395	185923.2596	67774.79986	73970.80078	46022.05858	50607.27126	99100.92558
PA(18:0/22:6)	20791.81806	68907.0487	57545.57462	41701.84865	100396.3853	69133.45387	81758.55212	28602.06878	54371.78325	51428.85842	80468.2124	47572.95179	33200.30987	24503.98262	66729.09237	19823.43624	74589.41955	46658.43426	51427.06015	59396.47317	68294.81118	60850.14697	77174.33153	38199.35087	68971.93987	36321.84745	27182.35328	50855.60991	45880.0457	16641.95668	25595.11853
PA(18:1/16:1)	0	0	0	0	1099.086776	1115.269809	0	1048.218856	0	0	1128.755076	0	0	0	1010.237097	0	0	0	0	0	0	1030.132308	0	0	0	0	0	0	0	0	0
PA(18:1/18:1)	1544.544996	2028.142243	1006.295803	0	4887.495111	0	0	0	1515.268062	1523.936769	0	1462.867596	0	0	2336.665144	0	1544.970559	2557.439213	1496.961333	1528.055685	1745.100746	3585.988215	1690.851946	1020.152768	3905.611421	0	1873.625512	0	0	0	0
PA(18:1/18:2)	1068.689215	3533.255087	0	0	7077.999276	7089.327762	3083.372049	0	3530.317116	0	1567.410385	3157.293468	994.9747562	0	1009.705326	3024.42932	5581.839198	2532.519058	0	1493.454783	3518.107303	3081.746661	2540.363605	2534.462595	912.6355088	2921.601687	2591.918606	1495.481379	0	1042.038617	1045.620441
PA(18:1/18:3)	0	0	0	0	0	1519.620957	0	0	0	439.9590259	0	0	0	0	0	0	0	0	0	0	1005.919391	0	0	0	0	0	0	403.4327465	0	0	0
PA(18:1/20:1)	0	1520.069195	0	0	0	0	0	0	0	0	0	0	1045.26102	0	0	0	0	0	0	0	0	0	0	0	0	0	0	0	0	0	0
PA(18:1/20:2)	1049.248174	0	0	0	0	0	0	1036.294848	0	0	0	0	0	0	0	0	0	0	0	0	1042.790782	0	0	1049.993722	0	1049.428993	0	0	0	0	0
PA(18:1/20:3)	1552.402507	0	0	0	3419.760472	1540.31267	1028.673871	0	0	0	0	1084.269158	0	0	0	0	3126.785888	0	0	0	0	0	2069.5681	0	0	0	2080.652636	1008.076679	0	0	0
PA(18:1/20:4)	0	3119.204029	2581.624379	0	11917.89637	8376.808669	17645.44428	0	4647.92998	3110.524413	5744.306443	6253.395409	3148.743188	0	4679.071505	2596.198949	2503.777698	6725.423644	1699.874806	6136.359653	6346.427048	2074.436954	6256.921768	2077.915336	0	3106.375916	2080.294745	3612.861034	0	1544.393231	4083.406282
PA(18:1/20:5)	0	0	0	0	1559.272312	0	1047.535949	0	0	0	0	1064.61877	0	0	0	0	1608.473339	0	0	0	0	0	0	0	1010.337513	0	0	0	0	1045.259273	1083.592367
PA(18:1/22:4)	0	0	0	951.8995695	0	0	1450.377707	0	1557.604747	0	0	1043.260842	0	0	0	0	0	0	0	1544.39172	0	1559.340174	1559.047807	948.7189997	0	1023.980603	1083.417161	1549.196616	0	0	1561.09247
PA(18:1/22:5)	1038.314246	1037.76959	0	0	1013.982162	1556.702857	934.4216314	0	0	1037.46904	0	0	1037.946427	0	0	0	0	0	0	0	0	1516.358967	2598.647901	0	0	2587.904485	1042.017343	0	0	0	506.0166832
PA(18:1/22:6)	0	1042.970986	0	0	1547.615204	0	0	0	0	2592.894865	1023.965746	1048.062664	0	0	1042.952645	0	1044.662198	2587.695375	0	0	0	0	0	1564.020956	1043.404545	0	1565.508981	0	0	0	0
PA(18:2/16:1)	612.2765394	0	784.0716369	454.4788383	0	0	0	0	0	0	0	0	726.9087781	0	0	0	0	0	0	0	0	361.1697605	0	0	0	0	1065.630132	0	0	0	0
PA(18:2/18:2)	1048.806577	1513.516058	0	1014.048396	0	0	0	0	0	0	1136.889008	1001.823756	0	0	942.4041721	0	0	0	0	0	0	2049.456138	1513.305803	0	0	3088.793118	0	0	0	0	0
PA(18:2/18:3)	0	0	1558.858931	0	0	0	0	0	0	0	0	0	0	0	0	0	0	0	0	0	0	0	1046.966442	1053.913409	0	0	0	0	0	0	0
PA(18:2/20:1)	0	1252.788414	1003.397111	0	0	0	0	0	1236.221686	0	2615.838796	0	0	0	0	0	0	0	0	0	0	956.3939749	0	0	0	0	0	0	0	0	0
PA(18:2/20:2)	0	0	0	0	0	0	1500.832476	0	0	0	1624.722234	1584.715272	0	0	0	0	1195.32843	0	0	1002.465075	0	0	0	0	0	0	0	0	0	0	0
PA(18:2/20:3)	0	1019.019139	0	0	0	0	0	0	0	0	1549.822921	0	0	0	0	0	0	0	0	0	0	0	0	0	0	0	0	0	0	0	0
PA(18:2/20:4)	0	2078.619014	2591.172679	0	1558.628084	1021.091598	0	1036.294848	0	0	1041.445066	1044.625298	0	0	0	0	3096.450517	1030.092322	1519.614819	1044.731341	940.4159094	0	0	0	0	1034.839798	515.7863855	0	0	1006.02725	1041.76768
PA(18:2/20:5)	0	0	0	1053.340134	0	0	1048.470766	0	0	0	0	1392.705738	0	0	0	0	0	1049.531475	0	1009.692312	0	935.7051355	0	0	0	0	0	1033.538042	0	0	0
PA(18:2/22:4)	0	0	0	0	0	0	0	0	0	0	1565.375655	0	0	0	0	0	0	0	0	0	0	1030.284053	0	0	0	0	0	0	0	1512.041728	0
PA(18:2/22:5)	0	0	0	0	0	0	0	0	1083.440082	1525.395008	1565.262366	1004.357859	0	0	0	0	0	0	0	0	0	0	1015.558068	1002.229845	0	0	0	0	0	1027.488604	0
PA(18:2/22:6)	0	0	0	0	0	1043.683456	979.2803987	0	0	0	0	0	0	0	0	0	0	0	1542.173586	0	1027.529035	0	0	0	0	0	0	0	0	0	1108.515255
PA(20:0/16:1)	2026.710592	11162.89343	8768.430287	4371.33802	16007.98196	9794.448962	7356.340748	12708.29393	0	2579.087184	11069.90958	3605.974333	2006.039308	5330.262184	8706.302037	3416.054103	4420.102683	6066.497247	4699.50194	6447.904888	8793.799603	7146.083757	7332.471956	3595.671987	8105.571402	12361.57497	2613.337737	2947.230922	0	6987.38713	2614.37265
PA(20:0/18:1)	44950.79824	86827.85115	113790.1729	60428.52156	163135.4226	173580.2444	124951.3334	56731.68018	42077.26178	47241.56693	123293.1095	154083.657	21538.14558	47581.26776	98062.44971	56662.76919	158891.454	78957.425	115805.4307	58181.27806	152704.9165	123510.4102	109488.0521	74171.71396	134150.0226	146138.2647	68652.58125	57419.17588	29049.05946	39397.91625	31557.6808
PA(20:0/18:2)	199772.3921	211507.3751	426070.0824	237289.9861	848956.5026	603978.9805	411182.5725	63368.38252	107043.5431	200905.9384	429616.1597	721650.4259	107683.4664	145393.6799	339879.4958	268169.7669	674780.9583	460501.22	563752.2464	261502.1409	514191.6063	310862.0279	467645.8468	226732.6975	546607.375	627892.0258	191878.5523	195483.6496	103594.7233	57270.29325	163002.1833
PA(20:0/18:3)	4638.600514	3963.556767	7161.314253	4047.982197	6752.802892	4100.560067	6848.099821	1223.014899	2430.622577	1556.656088	7834.734931	10432.65592	3069.026571	3055.675344	2437.725315	1891.816572	6711.721429	4582.653704	10578.30879	2505.631443	8152.573192	4443.145807	6486.74437	2515.720277	8640.302802	7989.010384	6262.756634	4025.931324	1000.426876	4251.536887	2167.935768
PA(20:0/20:1)	0	4684.596291	1926.453324	2451.243127	2899.308235	0	2073.20324	0	1030.845495	1018.254156	1443.335803	2238.778766	972.239543	1291.446778	2019.00637	0	4686.899986	3234.119157	3038.561788	3051.616297	3089.624927	5161.79655	2081.566452	0	0	1524.528038	1562.345878	1535.847671	1816.717091	2007.61939	2576.772218
PA(20:0/20:2)	1556.674116	4512.266983	2471.269819	2960.822094	9402.041724	3873.667886	4678.267684	1552.336826	0	5195.568525	5921.171165	7835.892781	0	1781.309222	3166.577963	1546.526853	3636.571491	1287.754311	4383.591732	7698.010471	2327.514001	1906.262858	6222.860494	0	1539.927218	1770.597408	3071.483693	2041.020738	2450.906042	3540.854712	0
PA(20:0/20:3)	32204.44148	97474.38479	101387.687	52632.19843	192272.6931	167928.6612	164778.3919	31298.43788	44224.70052	49096.26879	130746.9255	116599.2103	19871.31631	33919.20072	107003.5815	38506.55177	111515.4008	85971.75205	226911.2641	58300.80018	109086.6078	109671.9134	107994.1833	52523.29714	100885.6279	148646.4338	62712.11904	68369.12735	53178.07943	30168.85147	62285.316
PA(20:0/20:4)	335454.2944	968629.0291	1411485.867	611969.9398	2145784.915	1719554.155	1952276.537	709928.3693	508908.0205	368522.9506	1219906.481	1210212.331	429693.459	712318.1619	1279822.254	425233.2038	1041806.037	784416.4027	1207805.873	672129.7707	1382224.252	1294975.187	1002312.877	516575.9674	1228081.277	1646555.406	671864.6536	860916.2449	503348.1402	543561.4335	731829.0916
PA(20:0/20:5)	12727.88271	33683.92617	52763.71929	6664.628524	57327.49541	43951.61094	88325.4943	6963.985802	16674.05326	25529.67527	38535.5445	34394.49985	6759.273989	2607.824236	14254.7524	9361.760702	45895.44419	30561.70713	28351.4759	49294.93455	31145.21945	18527.69759	55227.94538	25240.03189	23953.59128	24409.3306	20230.41183	11443.21038	6464.837738	5715.542171	9605.160544
PA(20:0/22:4)	28991.91325	120620.1793	278413.6605	92466.42152	262784.4105	158932.9684	61574.05407	183378.8996	63252.5441	44737.10206	84400.11753	144425.6419	56645.6783	170743.7129	154494.8962	37431.20991	60893.90887	32256.91637	88245.36198	44897.82446	274579.3345	259324.0185	80380.04478	48835.19343	212554.6804	310878.9473	135082.0505	90494.17698	66039.90929	158221.1062	151059.5384
PA(20:0/22:5)	23946.3423	107296.6798	85419.81254	51508.4462	177342.2859	96686.41218	122072.0831	41364.68446	45671.40319	29816.2695	84815.85503	106762.4815	44598.82603	91900.27767	88242.51017	33231.70012	83154.1547	36720.01178	108719.6556	64723.22914	148352.4711	124485.3671	77594.19431	36651.91778	133683.0684	129794.377	70840.08374	50472.05867	41616.24542	67392.81288	61523.9716
PA(20:0/22:6)	15645.37055	63251.92934	89964.49	33383.72815	151714.0839	85079.30866	122701.6243	28198.71299	59283.70989	33320.6344	62838.81185	60393.48686	31709.75676	39712.99343	60572.96936	33610.26215	103013.9244	64164.11005	84426.80421	82484.52874	63752.71849	90514.01721	98423.72338	33566.66375	116132.9459	66425.34933	47675.94686	46253.16043	42281.74266	23851.29205	31630.17315
PG(14:0/14:0)	0	0	338.1289222	0	0	669.3114882	0	0	0	0	305.3592742	545.43157	0	0	0	0	0	0	274.5207554	404.0833309	0	0	0	0	349.8747975	0	661.8586195	0	0	0	0
PG(14:0/18:1)	754.3945435	415.6575989	798.458208	1224.616762	1245.227637	604.8763719	1777.192163	526.3963664	561.8276932	800.9093304	1272.279126	648.1669763	1374.413062	415.568293	976.4183605	0	1092.203546	2268.736	1228.469885	1315.476663	971.5406859	1610.098224	517.137195	0	1114.873367	2116.163691	1041.777552	678.2993318	0	527.447366	2181.423403
PG(14:0/18:2)	0	405.5635847	776.4053329	956.5151297	2219.681242	668.3921398	1697.01712	0	273.9240249	0	1241.383361	1545.015597	375.3133361	1037.26524	1058.78884	960.4369386	2098.615715	1664.155782	2085.534317	846.0924936	1643.505332	2314.9266	696.8845715	544.8307893	537.4307287	2583.261939	0	1677.295775	0	744.7988152	1682.07948
PG(14:0/18:3)	0	0	0	0	0	0	599.9975984	0	0	0	0	674.5391111	0	0	0	0	401.9523525	0	949.9309936	420.9972546	0	360.4686604	0	404.5689755	0	765.3915827	584.3339915	305.8800951	0	411.723462	0
PG(14:0/20:1)	0	0	0	0	0	0	0	0	0	0	0	0	0	0	0	0	0	0	286.9081994	273.9593598	0	0	0	0	616.5807833	0	677.8440411	0	0	0	0
PG(14:0/20:2)	519.2479632	0	0	0	0	415.8089412	0	0	409.4149999	0	625.9542782	0	0	272.6048509	0	0	276.5212749	0	679.8114765	310.9594725	255.3238466	369.1358286	0	0	0	0	0	525.9473572	385.3386726	0	397.4084865
PG(14:0/20:3)	0	396.8002734	0	283.8362339	424.2239873	560.9155435	0	0	568.0115987	639.6716515	0	535.3783941	0	0	276.8227011	0	0	382.0121729	363.5212285	381.1643311	829.0153602	501.5120258	415.9408667	0	424.2045046	0	0	368.3381591	0	0	769.4896223
PG(14:0/20:4)	629.2398955	1262.252608	1546.894496	418.7307183	2124.091329	1878.838933	2643.983326	1013.766725	1246.224258	1011.90302	1896.843029	0	1694.85729	621.1180227	789.43316	826.8843807	692.2747123	2117.908857	2372.440237	2500.542342	3114.973619	1514.989581	0	1259.128269	1671.429282	2486.739505	0	0	415.2812188	1001.900271	1184.892548
PG(14:0/20:5)	0	0	0	0	0	0	401.3473815	0	0	0	0	0	0	282.6658393	0	0	269.825	0	0	0	0	0	380.614335	0	669.3674922	0	0	0	0	278.0187762	514.4861217
PG(14:0/22:4)	748.0182055	0	623.4500055	0	869.5038289	1146.87761	498.378581	1248.013625	0	0	1699.312682	1353.877232	558.510924	979.0345978	1261.654493	0	0	0	404.0360125	281.8134256	504.0264956	377.8885592	0	0	748.6705856	872.8711934	913.7488097	0	1216.835966	412.3127523	0
PG(14:0/22:5)	0	733.5263278	418.5606785	499.0172839	893.2530897	655.8436566	832.3566919	0	0	0	0	0	422.1000527	0	1124.679594	1251.023085	0	955.6544604	535.1985519	675.5791185	1304.96893	586.855589	0	0	0	831.3286174	0	421.8520463	547.0820889	0	0
PG(14:0/22:6)	0	552.5140082	669.2205009	692.1872368	977.1909169	391.0046279	1073.939276	0	424.1340661	0	1045.034324	902.3646518	262.6123128	0	557.7793093	282.6538831	557.398804	530.6687522	918.913013	1659.648663	552.6100344	401.1508785	415.2982932	0	0	672.0063793	697.7967288	562.5878142	426.1270973	287.1815312	930.5681887
PG(16:0/14:0)	0	946.9380368	0	5762.089193	2191.528844	2394.736207	2955.59248	1154.210954	271.6707229	0	3840.403332	0	503.7010391	390.6510008	415.8471387	273.213952	684.9139281	2506.123667	0	768.1396107	963.6005207	593.2900319	1093.05996	0	689.6681073	2817.164987	0	0	0	0	894.0508137
PG(16:0/16:0)	4098.945583	17131.98217	9893.104419	25388.99031	11862.91902	4723.492149	11356.87531	4998.717309	10878.42233	3876.262727	14579.41438	7341.67901	3902.346681	4736.735328	11350.17867	1246.389464	5298.125135	13130.27079	4660.044284	9984.558411	5630.259544	8906.335642	3284.053686	3645.549755	5993.541485	19220.54107	3111.375966	10430.61924	8042.225437	5099.423302	6969.387168
PG(16:0/16:1)	798.177599	3784.211293	5035.668242	32584.53291	4733.737023	5396.60991	4510.977947	5955.338195	4044.100058	2896.537104	13151.26136	2236.386353	811.7917143	679.56302	2261.20629	2346.0142	2372.915255	12461.51484	1087.649504	4604.285645	1942.217253	1284.125345	3928.093041	555.0295078	1923.862488	9074.099545	1561.709506	2311.670354	5169.46678	1087.900425	4593.717075
PG(16:0/18:0)	1873.461329	4349.525438	8385.020325	6070.422774	9810.970629	4237.882609	5071.514471	5931.645245	3088.783209	2963.471076	8537.484567	5412.812581	3611.272969	2779.058543	10911.72285	998.4830762	5002.981896	10805.53498	4581.431562	7112.005331	6300.948155	4404.295911	3649.056208	1611.851076	7206.332352	10335.59788	4338.057851	4624.812643	3768.555934	2508.498252	7744.609475
PG(16:0/18:1)	24459.97864	117304.1178	195931.575	250638.7441	115149.4057	68225.98353	151887.1921	124734.6433	124620.6074	97970.59262	230774.331	76349.95425	117567.3536	72269.49126	247292.4774	53422.59895	85646.21903	216164.2854	99031.28753	133769.74	89049.26403	105211.0319	85183.39845	23614.60777	211005.2092	155480.5903	82415.23834	167446.7447	96152.40327	45573.29121	130746.7845
PG(16:0/18:2)	10351.63213	32065.54231	40926.94827	102528.7359	32776.00843	27323.92755	38097.91118	23494.48759	45382.36021	25248.87697	65418.30997	35433.05139	31777.83679	14503.6304	47262.3183	17162.7946	26020.65937	87126.50968	37442.27437	37722.39641	24853.04557	25020.35714	28962.11092	11888.96332	51463.5517	68916.61794	26665.82752	59867.97385	25276.44758	14895.20238	34123.35257
PG(16:0/18:3)	0	1666.427107	664.8540861	4351.007425	1588.250634	1828.884054	658.4521435	0	828.7049222	0	1887.574364	1059.826453	697.322702	424.5775948	680.2913143	694.2095008	402.7881505	3332.174197	282.9293162	0	696.3366193	0	692.2715931	0	1665.347194	1395.650169	358.8114071	978.5938603	263.6283335	421.5186378	938.5181742
PG(16:0/20:1)	0	1808.616672	1071.687883	2369.389982	2147.147217	264.893926	798.1080862	932.8167948	697.6648057	803.8910526	2219.762246	1175.681557	1406.707947	464.1541174	1679.146468	1059.085008	699.2872329	1870.395247	1175.787148	1287.501195	1808.992199	1367.658015	975.4099359	419.9432869	2371.218602	2137.54407	0	2013.732276	0	0	1435.617608
PG(16:0/20:2)	2539.008285	13426.33435	14633.24547	21589.03584	21009.48671	9121.29017	20539.33481	7356.05325	8792.604646	4973.91731	22211.66942	17026.75669	18504.50574	5831.133265	17227.54047	4932.080661	5756.739516	30013.43227	22278.7612	12446.8883	10384.93959	16255.85441	10594.19678	282.335829	23238.94836	27544.44529	8510.779923	14977.74886	11140.43318	4678.278374	27733.46883
PG(16:0/20:3)	1066.495309	5735.23579	2107.480985	6916.71183	5932.91737	1126.003592	4960.569241	2374.260871	2088.219658	2396.875328	7729.387015	3867.984205	4158.270783	1243.576729	2027.5858	1937.304006	2438.911925	11293.47201	4293.505247	4549.972096	2713.837734	1444.07794	1951.032416	558.52207	4922.417297	4243.459635	1860.694874	2530.396671	3475.647745	1660.667402	3581.935617
PG(16:0/20:4)	4652.769218	4771.764612	8705.53687	17900.70895	9100.779998	6673.202732	9944.978439	5421.744478	7319.997618	3723.262572	14894.51501	14204.59788	12799.11687	7139.212054	14712.26676	1771.520796	10399.71042	18460.79068	12124.3308	11917.09763	15339.12929	6243.943131	6443.767522	9078.927302	9441.616011	27777.28376	11970.69336	7944.636127	1601.459576	2992.34952	20587.36249
PG(16:0/20:5)	0	0	400.1288342	677.1930752	646.2893362	1095.366522	529.4874169	0	1221.621403	0	791.0293295	0	0	0	686.5870185	0	681.08203	658.9640179	0	1367.844042	548.1666768	0	0	0	411.1213596	0	0	278.965541	281.6857769	0	0
PG(16:0/22:4)	0	278.0788999	687.2808388	0	1093.232983	692.6739926	534.9071186	400.6284159	275.5880372	400.4633663	1046.965638	507.2743613	414.539201	393.2704525	411.0340252	0	414.4078112	935.8558293	281.3769461	561.9875175	1516.30552	1201.583433	0	0	666.4679664	1045.08273	1201.188733	413.6272442	0	398.4568904	796.4967551
PG(16:0/22:5)	0	831.1248438	931.1642704	831.6286699	644.7618227	412.6807062	401.9618801	0	1103.756481	402.101362	1049.096506	730.4412527	0	619.9544158	556.2833672	0	0	937.9999996	889.2349374	0	550.2548931	667.750774	274.7157764	277.9500494	692.7848026	1008.111674	1076.295488	363.1767731	0	0	0
PG(16:0/22:6)	0	275.0038722	605.4775676	412.2128105	963.6427012	281.2478073	566.6865362	0	0	605.21745	2090.633252	3171.656869	760.9045961	266.8776195	1241.86395	0	0	1025.290351	646.9925555	1021.742132	412.7552084	691.9430011	277.8672444	259.4608172	277.2107146	1088.614003	624.2548831	642.3542247	506.7011326	0	801.762075
PG(18:0/14:0)	0	563.2739052	363.0639515	1817.56328	697.080928	275.0050464	484.006972	0	505.9468857	600.8702994	654.9542334	669.8244754	0	369.9113789	0	272.7561549	1395.330447	968.6886949	403.6285263	926.6987175	419.6335146	488.5987339	280.354173	423.1474574	529.4677106	970.2909534	0	382.2026526	397.1111213	0	0
PG(18:0/16:1)	933.7444753	3497.017876	794.087287	13809.34618	3486.279754	2233.349421	3674.670237	3756.727035	1723.599118	537.2761057	6716.111986	1047.814713	684.2606984	410.1577944	1674.535529	1261.776225	564.6531115	4669.990256	785.8421697	1104.516142	1674.853151	811.2535188	980.5849696	836.9270705	2626.386204	3616.262263	2220.811013	1376.998914	1371.833073	0	2215.608407
PG(18:0/18:0)	662.5518919	4458.958874	3110.711809	7381.639434	4000.49645	1082.455485	3466.552619	3089.434518	2225.69126	2408.936839	7696.61991	3401.736409	2347.865897	2070.654672	5150.652832	1807.59487	2577.540477	4053.049014	5042.061118	4802.561357	3529.648078	3887.677087	2843.525807	819.124353	6389.180587	4213.160746	2976.915708	6570.42113	2134.28351	436.7020855	6585.822237
PG(18:0/18:1)	16216.05202	92172.90805	101504.557	140522.3628	64223.15956	23663.6165	63987.46384	105032.8764	43903.4041	42067.14536	149302.4433	37864.97122	67798.95447	42208.41589	102216.5908	26334.97394	37343.8279	86222.62578	93201.76665	114469.6757	57902.67732	56310.56425	40803.82403	18572.04285	116915.1232	74206.03317	47667.57458	162391.671	67280.27363	21840.08384	117559.1574
PG(18:0/18:2)	15057.94939	76198.22674	73521.22965	178583.4374	58307.37887	24532.6307	79973.70904	59638.23463	52891.86986	36517.58219	157215.3117	63328.73838	59806.60823	38636.62257	85051.86938	28976.14034	32717.80039	128523.4371	110084.9684	64980.99204	52578.9173	50022.39735	37840.96902	14650.76102	101983.1062	105701.2879	61435.34552	130665.1663	87614.84688	22687.55686	109732.51
PG(18:0/18:3)	604.0881028	1534.739756	729.393001	5016.754768	1113.330234	559.1489496	1456.368069	605.9127184	415.8263782	0	2667.040416	1332.085184	530.7248961	273.5253498	1119.476794	419.988027	415.3157526	1919.60539	0	1213.328306	698.0266658	851.5091503	270.7276733	699.847267	1675.019954	0	975.5503931	409.1607243	798.9561149	0	1088.582352
PG(18:0/20:0)	454.0528486	616.0124652	451.4828847	695.1688761	1671.325164	463.4792854	920.3084104	698.7097934	932.9067645	0	1357.27722	2535.257639	625.59377	947.916013	1036.519723	483.3604172	1316.737229	1118.702538	1278.255765	1960.932312	1245.090423	925.0411192	713.9384403	464.9197065	777.7865509	1062.193019	1153.999468	906.5745964	708.7081862	294.3250712	1124.036504
PG(18:0/20:1)	937.2147509	1518.243397	1873.875181	2633.946281	946.7385399	553.811059	937.1056242	0	0	925.9756467	1648.983432	1146.467628	673.3898013	0	563.7093327	693.6411474	438.5347874	3530.557559	1628.259173	553.0706761	0	937.8721774	0	971.3393857	965.0045995	1606.16698	0	2010.468552	932.4089108	539.8398358	2007.185727
PG(18:0/20:2)	4022.670112	13560.26714	8900.367105	13087.31437	7760.25259	2496.027229	9553.604385	6266.693467	4295.97992	5021.670771	20087.62642	6129.083288	9150.808369	2440.338597	7087.873784	2450.630581	3287.50891	10496.38337	13400.78818	9194.181733	6560.253009	6440.122177	4719.223781	1805.007909	14937.55127	12474.33889	6055.102009	26082.88217	9223.114278	2564.766184	21951.70771
PG(18:0/20:3)	1339.097468	4592.938053	1708.815963	3358.173461	3506.419628	1382.28615	5405.763615	2279.634361	1724.221297	2142.10705	13205.43603	2743.535934	2172.530064	736.3115231	1558.340287	810.9269994	1360.14436	6614.960143	2747.830932	3167.180261	1901.377421	1942.231221	2621.327118	422.4463499	4152.16207	2848.962354	2236.446203	4830.408037	2966.214942	688.176947	5948.44172
PG(18:0/20:4)	2842.272544	11429.85743	10770.55193	17487.56518	20811.67798	7378.832074	7753.117497	11309.71728	6242.089252	3729.861281	9837.690652	9986.414644	10372.91971	9733.40452	17516.55899	1864.849444	5591.170586	8661.350174	10592.66044	7624.42778	10170.75273	8644.004336	6701.281332	5822.506765	12198.4525	23844.88483	9030.894611	10523.8399	5022.070861	5172.369431	17597.09925
PG(18:0/20:5)	0	0	0	0	0	0	0	0	0	0	0	0	411.2094597	264.8207686	0	0	0	384.3119999	271.2509684	693.922098	0	381.5899884	0	664.6675573	0	768.624	0	399.2384461	258.246175	0	0
PG(18:0/22:4)	0	0	0	0	909.6133959	707.3145957	0	0	0	0	1159.178569	0	0	0	0	0	0	0	0	0	647.5142028	0	0	0	645.1524196	385.3472127	389.590271	528.2806341	651.9763503	389.274986	776.0467422
PG(18:0/22:5)	0	0	393.9293079	659.1145258	0	0	523.0412837	0	0	0	1148.09274	737.0189811	287.3257653	0	776.6159344	290.2239874	0	0	0	791.381692	678.0522814	0	0	0	401.3022822	0	1308.70488	0	262.8056407	265.5416376	683.1360581
PG(18:0/22:6)	0	0	0	0	514.0852431	0	0	0	0	0	1484.265187	673.3045275	0	0	0	0	0	769.1778383	594.1448533	535.1662717	0	0	0	0	0	0	0	0	0	0	1479.883452
PG(18:1/16:1)	1198.417546	3806.790203	5028.992172	7427.478227	5522.750597	4041.16099	3409.02188	2957.200147	2622.564159	1682.16052	6221.660145	1601.253117	2943.161592	5083.935577	5847.45279	1114.559616	4869.6584	3942.376756	3086.269368	4055.17191	6480.961451	4283.530316	2818.463512	1549.987889	6969.084346	4667.750821	5945.811445	2680.868968	2941.95166	1808.979885	2165.600838
PG(18:1/18:1)	2926.984992	7473.637338	23087.52329	19399.14875	19038.47797	6323.786642	8777.217303	15928.52091	10323.229	10506.15994	26152.34081	13534.61851	10576.30275	7721.97303	36596.07678	5582.605873	17036.81029	74043.58489	13989.20442	20092.34471	12925.27788	14003.23391	8730.274694	3811.946058	17168.79412	15226.94652	19418.49447	21746.00886	9713.418693	9177.56323	11945.96863
PG(18:1/18:2)	6860.457709	28193.1059	32710.05277	95350.7475	38061.05257	27618.13492	26977.31099	20519.50929	30215.53335	185334.9339	155335.9318	66870.28685	206149.8895	71221.99426	141003.2977	19432.37018	63492.4032	31887.45951	82097.01427	97096.18625	39345.69568	38309.04083	51706.51024	10377.72856	182580.3377	25299.56357	40834.64344	92096.30997	51233.20047	37836.4822	45941.1785
PG(18:1/18:3)	0	0	0	418.1606553	1254.414075	700.7721907	1336.379457	0	0	0	1465.036889	500.0845495	0	486.3966131	4004.242678	0	978.2499638	924.4196474	1881.689047	4352.546208	555.0395611	0	0	396.0367346	1254.312322	803.4663458	484.4520381	1743.537723	0	0	0
PG(18:1/20:1)	0	0	0	0	0	0	631.0190931	0	0	0	0	0	0	0	1068.006623	0	0	651.776	356.1273945	536.1764351	395.1801169	0	0	0	665.184463	0	656.3265767	0	0	0	1061.182568
PG(18:1/20:2)	0	974.465759	808.9831864	423.3956238	975.4047258	281.3437714	535.9139026	0	0	402.1582023	647.0367772	379.6881593	544.2730163	669.6916778	1535.5513	0	419.1918602	0	1220.205253	402.6259167	694.7747332	496.9003593	272.3321141	283.634742	1531.657962	670.6223637	0	277.8569189	268.7295608	0	0
PG(18:1/20:3)	0	820.4558544	797.7914522	1081.181379	2100.283663	684.5070387	398.7889631	0	1356.297575	0	1512.41371	934.9580174	0	386.2933427	1221.133642	0	1642.055383	0	2546.000494	1304.851353	810.6603732	1330.144189	0	0	274.0844229	926.1197462	519.0094794	1160.686169	508.0322321	638.1389398	405.0705214
PG(18:1/20:4)	1887.226969	2620.928788	6134.210672	4453.846617	10238.0534	3396.525156	2597.50869	5492.10772	3303.746263	2346.768841	4819.04319	3645.028069	2879.058368	5167.599707	10267.22854	979.0350798	4099.744291	4365.948709	3220.689711	5290.785583	6898.096655	4460.546081	1649.856122	2264.9926	3674.456733	7579.288836	4889.927699	4412.489475	625.5789456	1788.397603	5051.687183
PG(18:1/20:5)	0	413.3697704	525.3107123	0	413.4145157	675.676656	0	0	275.5925439	395.0224963	0	0	0	0	0	0	0	769.814935	380.8748336	253.0533311	410.5956661	0	0	414.1409695	413.3924823	0	541.984107	0	0	0	531.7991165
PG(18:1/22:4)	0	415.9958042	390.6087173	556.0888069	828.4310949	413.7663003	0	400.2386821	0	0	811.2171736	532.3983314	0	1191.79448	553.0134463	0	0	0	257.4803105	538.5115387	782.7309871	0	0	0	547.9186031	996.7048275	677.2609292	0	0	519.9902529	540.1711952
PG(18:1/22:5)	0	0	740.820097	0	559.4537948	442.645994	0	0	0	0	0	0	318.0417178	379.1848905	661.8463448	0	0	1930.883229	752.9042251	445.1609712	328.156787	0	0	0	0	857.8720545	541.4183647	251.9229716	381.7577986	0	0
PG(18:1/22:6)	0	0	332.4876807	451.9612058	1508.062798	0	834.2383077	0	831.8239196	0	0	544.4120711	0	0	601.2766182	0	595.0019272	701.7130522	527.3250964	732.0515383	711.2031197	0	394.6533271	0	0	0	0	245.9213347	514.4196368	0	0
PG(18:2/16:1)	4379.344534	5520.159863	9144.572665	3181.345268	13485.25739	7493.213593	4081.22786	1779.791893	7708.952135	3495.050024	10569.0759	31279.24672	3739.501263	5415.540713	5973.101747	3193.304995	11819.21711	8378.28268	2218.122764	8044.140435	12338.0972	5134.173699	5295.685873	2108.639893	10184.12139	14760.25852	6533.591665	5554.344129	4339.522696	3350.46995	4937.52287
PG(18:2/18:2)	2916.517424	7740.140432	10418.17288	9681.397033	18275.65542	7948.864553	3746.623665	8541.731823	8103.317728	3920.178303	5722.557752	10641.91396	7187.372883	10401.05383	11996.47421	2507.590244	6842.901464	32045.13048	8412.196562	6451.364656	21629.50593	11731.60461	6151.069726	2425.627149	13242.46603	16276.21926	18384.04364	7975.153683	5205.284678	5008.436709	10884.87155
PG(18:2/18:3)	0	1367.483019	1017.753603	1656.28737	1330.653171	1319.983532	1348.509191	0	0	1703.824504	2208.678896	1619.689784	4309.592662	589.2341379	1896.305353	965.3775721	573.9445232	3560.191931	0	0	1651.85897	0	1577.217309	1036.949497	1984.361653	1385.760554	875.0939282	1279.284173	856.3804072	0	828.2321043
PG(18:2/20:1)	0	0	0	0	0	0	0	0	0	0	0	0	525.3322544	0	0	272.6761631	0	904.7616249	0	0	409.2545531	338.0941671	0	270.9011506	0	0	0	418.6295692	0	0	0
PG(18:2/20:2)	0	320.511191	2325.320859	1173.537437	0	1996.066794	1487.831404	479.7105443	0	2990.724521	1813.226955	2548.727365	2906.939493	2896.637758	2617.242636	1479.227826	1383.926823	1348.449747	2386.777578	0	3970.104155	2179.253531	1538.50434	0	2746.934049	0	3381.649086	1553.518525	0	908.6279742	1035.99621
PG(18:2/20:3)	370.6140688	0	0	351.4111353	362.4466386	0	370.1913485	0	358.881746	0	491.871144	1283.043611	344.0752388	348.2868749	509.4242225	0	0	0	797.6170064	1128.511985	960.8601905	1175.64046	646.3929352	0	0	0	2290.527006	2624.021107	0	0	636.5154203
PG(18:2/20:4)	1225.540432	1347.445653	4390.064969	2006.945761	2506.147482	1877.503063	3136.167543	2027.830523	1671.586587	1077.134014	2441.800419	2444.334751	941.148643	2578.02973	4232.640738	1838.022299	1841.71159	4664.344567	4492.87621	2412.748137	1206.975695	1940.487436	1904.791631	1014.548725	1676.132111	3660.732369	4504.414931	3893.878813	954.3448013	1372.692732	3823.927357
PG(18:2/20:5)	586.8413043	0	0	0	902.9774631	0	468.2815215	401.6889945	0	0	388.9183988	0	0	0	0	0	0	0	0	513.8633334	0	0	568.7759709	0	0	400.928	482.6135084	0	379.424669	0	0
PG(18:2/22:4)	0	0	856.8546382	0	0	638.4261355	0	0	0	0	0	0	389.3639453	653.0224618	367.1460413	0	1106.088003	0	0	518.8195278	0	0	366.8011618	0	0	0	524.8440751	258.6938473	0	0	0
PG(18:2/22:5)	0	0	0	0	0	0	0	0	399.5378414	0	366.5290609	0	0	0	0	0	0	0	1152.309943	643.1189043	0	0	0	0	0	816.6792365	0	531.2773655	0	0	0
PG(18:2/22:6)	779.9942708	399.4006916	781.2169775	0	0	0	0	0	0	781.3513826	0	772.7920931	448.6120714	0	0	0	0	807.0400937	0	405.2104582	0	0	0	933.2741961	406.3011859	0	0	565.8716753	414.5713501	277.5447897	627.758509
PG(20:0/16:1)	0	0	0	0	0	0	0	0	0	727.2111936	388.196458	839.5530161	345.3602961	0	0	0	0	0	0	266.0651289	0	0	0	0	0	0	0	0	0	0	0
PG(20:0/18:1)	0	0	720.3535457	0	924.541286	0	446.3842236	0	0	945.2537682	1354.980632	0	2286.997316	0	0	567.0737336	0	598.7867876	1103.085941	911.9986711	858.3429984	0	0	0	1316.550182	505.85339	2244.422226	1391.295088	0	633.1837069	737.7901717
PG(20:0/18:2)	0	0	0	0	789.9348594	0	939.6836918	0	0	0	877.9469961	610.7815144	406.2677892	403.3889892	0	0	0	0	1438.397175	753.991825	1105.975371	0	0	0	0	0	1184.569618	532.8355332	0	0	0
PG(20:0/18:3)	0	0	0	0	0	0	0	0	0	0	0	848.1431101	564.8971775	428.9807777	0	0	0	0	0	0	0	0	0	0	0	0	0	405.1749341	0	547.2682102	1094.089906
PG(20:0/20:1)	0	0	0	0	0	0	0	0	0	0	0	0	0	0	0	0	253.8148595	0	0	0	0	0	0	0	0	0	0	0	0	0	0
PG(20:0/20:2)	0	0	0	0	0	0	0	0	0	0	0	0	0	0	0	0	0	0	0	257.1477599	0	0	0	0	0	0	0	0	0	0	0
PG(20:0/20:3)	0	0	0	0	0	0	458.3731864	0	0	0	597.4960757	0	0	414.7107683	0	0	0	0	0	406.3769976	0	0	0	0	0	0	0	0	0	0	0
PG(20:0/20:4)	538.2910759	840.9249527	645.5760832	0	1276.520387	0	0	0	0	0	1191.688876	1190.415054	381.6647506	735.2951194	909.1153457	0	406.3475748	786.6304956	1010.202384	1138.495742	0	0	0	0	944.3803199	1755.363194	0	873.1664273	492.6152275	472.4936419	1018.220573
PG(20:0/20:5)	0	0	0	0	0	0	0	0	0	324.6905185	689.9293222	0	0	0	0	0	0	0	0	0	0	0	0	0	0	0	0	0	0	0	0
PG(20:0/22:4)	0	0	0	0	0	0	388.340328	0	0	0	0	0	0	0	0	0	0	0	0	0	0	383.0933055	0	0	0	0	0	0	0	0	0
PG(20:0/22:5)	0	0	0	506.5926755	0	0	0	0	0	0	0	0	0	278.5307527	0	0	546.7834736	0	0	0	270.7374584	0	0	0	0	0	0	0	0	0	0
PG(20:0/22:6)	332.8264117	0	0	0	0	0	0	0	0	334.1055713	0	0	0	0	0	0	0	0	0	0	0	0	0	0	0	0	0	513.609604	0	0	340.6005292
PI(14:0/14:0)	825.6188643	0	0	0	0	273.5506024	0	0	0	0	589.6769041	0	0	0	0	0	0	0	0	0	0	0	0	0	0	548.3137787	465.2064228	0	0	0	0
PI(14:0/18:1)	1119.819676	8848.040364	2950.312751	3996.14079	3530.56821	13209.56645	715.1628086	2268.097472	884.1876984	4513.480151	2838.766145	2806.580311	3664.331964	1161.391105	5796.285348	839.2542862	6795.692793	2728.518485	4354.951205	3729.076969	7536.548163	6343.776442	2288.19535	2451.925341	3420.930639	8243.487727	6355.88771	5580.137312	4127.011264	1762.633321	2421.318077
PI(14:0/18:2)	3700.892901	24783.90377	7674.674495	4880.235064	13617.31374	21775.43649	7673.394767	1934.492611	3872.899054	7365.257774	12284.69703	18726.16905	6699.130893	5830.946942	12540.73717	2902.383623	10965.37975	14358.86885	10991.02497	10312.01137	12143.66943	13065.79161	11477.56072	2884.272715	9650.23204	16620.04661	11553.30375	8038.480224	3624.178464	2647.539915	9582.753139
PI(14:0/18:3)	0	0	0	379.6031562	340.2242939	0	0	0	0	0	0	0	0	0	0	0	0	1047.66527	197.0850427	0	0	0	0	0	0	511.9663898	895.0638113	0	0	0	1182.682416
PI(14:0/20:1)	0	0	0	0	0	0	0	524.4730281	0	0	592.6242383	892.3642576	0	0	0	0	0	810.2677217	0	822.7378625	0	0	0	0	0	0	671.2300245	586.0760392	318.6496538	0	592.5230989
PI(14:0/20:2)	0	0	0	874.55551	592.1972807	0	563.6917073	0	801.2540974	0	0	1629.64359	496.8271981	0	466.4588493	0	0	0	206.7233111	0	0	0	0	0	869.7931436	852.2334381	904.4004656	0	0	0	897.7044995
PI(14:0/20:3)	2501.108803	2626.230473	4475.242222	2981.86371	2587.526307	1590.753024	1969.358325	1079.371316	3054.059094	1400.901748	2520.206801	2689.817614	2156.036162	2566.090552	2738.367489	1054.194561	1926.140142	1138.183126	2899.528832	2325.785602	4096.398812	3879.22738	1085.417546	1901.93646	4733.014199	2107.258736	3037.540026	2048.500399	1058.677638	2394.205589	8619.989624
PI(14:0/20:4)	2015.564934	7299.870699	6583.959366	2001.511892	7422.49559	8701.291304	10071.01965	2589.347436	1421.80192	4118.741085	8482.371436	9439.223496	5488.275308	2605.896902	8429.104856	2843.380626	8465.676778	4712.140692	7820.934445	8768.442583	15138.43504	4679.665818	3510.336241	2963.324003	5359.807892	5874.539655	9286.228264	9690.289946	2756.652026	1160.975335	9239.026814
PI(14:0/20:5)	0	807.5624244	1446.198601	572.4618645	0	2160.376348	1555.877024	0	849.1730683	0	1747.895861	887.491573	0	0	1102.276487	0	0	587.3553488	0	571.5055684	1136.717689	1460.830059	0	550.3926624	0	1166.084111	1026.169199	4622.025958	583.4612168	0	453.0316353
PI(14:0/22:4)	0	0	2636.810339	556.2610129	0	1353.15855	885.0638133	587.3322916	0	0	2982.655858	1502.149021	560.0162399	0	1940.378882	0	0	0	839.161476	1451.336411	0	1444.647029	0	0	0	2043.862811	2085.627646	2020.188642	0	0	1202.122993
PI(14:0/22:5)	0	1076.769736	1380.153256	1382.842063	1412.291829	0	1455.887461	0	0	893.3851273	2689.480026	2398.991054	1133.218475	869.5077664	1365.677355	0	0	1419.473528	1138.696323	747.3235402	1402.91788	0	826.624274	1729.52491	1006.015763	2038.258987	0	1445.4983	0	553.3015543	895.3517746
PI(14:0/22:6)	0	518.9548338	824.7026629	0	0	0	0	0	0	0	264.7141754	0	0	0	1193.069266	843.1940689	0	0	0	749.4008412	0	823.6095773	0	0	480.919727	560.5376006	0	0	0	0	0
PI(16:0/14:0)	0	0	0	0	0	0	0	849.4541392	0	0	593.7345871	897.2951793	0	0	0	0	0	569.4600114	1330.28754	588.1757671	0	0	0	561.3485337	936.2791268	0	0	0	0	0	596.0332387
PI(16:0/16:0)	0	487.1563803	354.7151056	1283.503072	0	1036.276382	1128.947013	0	917.5691325	0	803.5980611	2140.822196	0	0	0	0	0	0	0	1477.53268	0	893.4543343	708.5234625	0	0	707.6141159	0	1072.954748	0	0	1081.169732
PI(16:0/16:1)	1523.176054	0	0	2094.464858	913.6361057	0	1314.270875	0	0	0	0	0	0	0	0	0	1614.769228	2073.32165	0	0	0	1483.627381	1559.047807	1377.380519	1132.434118	1823.075387	0	0	1019.604737	0	0
PI(16:0/18:0)	2355.132578	2305.106669	2970.974899	1909.090371	3499.9552	3064.876669	3447.222982	0	1032.469672	0	4865.380794	2552.764598	3121.806402	927.7088275	3930.345924	1020.743101	5680.311605	977.3651897	4106.023549	1377.052947	2565.170075	4224.373543	4662.464438	805.2497402	3649.433071	6831.044023	2645.306085	1162.627947	2015.933628	1565.989416	3051.945028
PI(16:0/18:1)	2247.532658	2786.964218	3417.652754	6163.965759	5804.181838	2778.364936	2772.275938	2017.315695	3986.73319	1900.446624	1491.907126	1054.107539	974.0873921	2151.026961	943.384032	0	13871.27972	1822.259291	0	3285.756689	3957.85207	6783.869365	3991.59863	3040.066353	5379.921837	6381.883556	2793.862435	1942.146006	2455.237706	1587.206208	2208.367454
PI(16:0/18:2)	2679.221261	4204.116	2460.56246	6136.716066	6344.440267	3865.615676	12398.75489	2325.981631	2514.772115	8355.427493	1949.312079	2935.310363	0	1176.693088	2738.729682	1682.649023	7462.980414	3375.719972	1574.343892	801.8850231	3883.538968	4648.040864	10695.50429	7975.322521	5617.955561	15595.84247	2074.077872	3980.137166	1980.141399	997.6989686	1011.752029
PI(16:0/18:3)	123144.4801	674193.3624	313758.2247	625523.7825	506594.7973	377264.4374	368368.9085	140754.2825	163616.93	264013.5444	631925.8104	395023.1867	278430.435	218939.0604	201532.1268	114906.4178	450520.2023	1059174.295	280233.8848	382017.0069	622692.062	252443.0481	412518.0567	130375.5151	336702.0815	428418.4958	213371.076	310064.3169	246434.2067	55568.55243	271450.2972
PI(16:0/20:1)	0	0	0	0	2082.126171	0	0	0	0	0	1056.173701	0	0	0	0	0	0	0	0	0	0	0	1033.767257	0	0	0	0	0	0	0	0
PI(16:0/20:2)	0	0	0	0	0	0	0	0	1042.597516	0	0	0	1045.26102	0	0	0	0	0	1576.878814	0	0	1573.37857	0	1557.716792	0	0	0	0	0	0	0
PI(16:0/20:3)	436.3115023	498.3719184	246.7063498	0	855.0156139	365.7037747	0	0	0	348.9224108	1587.181777	0	317.3268044	0	1545.560204	0	0	645.2370726	1000.552048	1501.784553	512.4130067	466.6694599	247.5780445	0	0	337.0264948	0	1430.154156	0	0	0
PI(16:0/20:4)	1643.055557	4383.663236	2164.485121	30987.68058	9384.442165	4558.032892	4980.12065	3169.792377	4490.894241	3119.657481	4848.357514	1675.189727	0	2271.169996	0	1652.224565	7512.947058	1235.420571	0	2586.332098	9762.947733	3522.119138	4232.236903	6420.756016	4879.73206	19954.93933	0	2992.875213	2973.030872	0	1385.823787
PI(16:0/20:5)	0	0	0	0	0	942.7893236	0	0	0	0	0	1533.069261	0	0	1053.501715	0	0	0	0	0	0	0	0	0	0	0	0	0	0	0	0
PI(16:0/22:4)	0	1025.982434	0	0	0	1198.217384	0	0	0	0	0	0	0	0	930.5948956	0	1016.947367	1559.580364	1567.136873	1034.110974	0	1757.202891	0	0	0	0	0	0	0	0	0
PI(16:0/22:5)	0	0	0	796.7795329	1235.20257	0	1461.39501	0	1554.208626	0	0	957.2014652	0	0	0	0	2107.824731	0	0	0	1553.78329	1573.427731	0	0	1042.969395	3473.982983	0	1049.056401	0	0	0
PI(16:0/22:6)	0	0	0	0	0	0	0	0	0	0	0	950.0581687	0	933.7645403	1981.555764	0	1407.424557	0	0	1568.510849	1564.942216	1573.538557	0	951.3367757	0	1047.900692	0	1006.107629	1050.241351	0	0
PI(18:0/14:0)	0	0	340.0011339	0	0	0	0	0	0	0	483.2455507	1042.852189	0	323.176433	222.79839	442.2261465	247.5734313	0	286.6495981	0	0	0	0	352.6395258	215.7687502	217.4836297	0	0	201.0038554	0	0
PI(18:0/16:1)	1046.360174	1027.371416	1571.050959	7229.666107	3834.596419	1765.607196	2907.283069	0	2798.319365	0	2142.146578	1573.231136	0	0	2085.108508	0	2180.290789	0	0	0	0	1527.682191	976.4766889	1560.567839	1576.260251	1023.338283	0	1406.152469	0	0	0
PI(18:0/18:0)	0	2324.719543	12571.72828	2983.730403	9716.382749	10081.9139	7510.547537	2066.712207	2541.737324	2603.389524	4068.984849	3624.663626	0	833.1645219	4483.76524	1043.650324	1731.886483	2504.712427	2728.616053	2486.312142	6270.124404	3553.275957	1453.072811	0	10725.55888	2800.583465	2086.671668	778.0730751	2028.558652	1505.535415	1946.703725
PI(18:0/18:1)	1929.938819	1368.975161	1744.706213	12049.72047	5720.857133	2902.599005	4378.701728	1330.257212	2463.249746	4607.962647	1032.828408	2083.725746	1172.711546	4541.917868	3048.293083	3323.075214	5047.774432	1234.780812	1933.106619	1227.953777	3179.398286	3440.507651	4625.27503	4344.648865	5850.974631	1981.835133	1526.595696	2181.49881	2039.187342	0	1528.280709
PI(18:0/18:2)	9361.901016	6168.732099	9448.356821	12708.50025	4762.66233	8292.568075	14853.57445	3350.822135	5727.494928	8505.108413	0	2223.201026	3932.039093	2562.514295	5000.798973	4335.003794	9334.512127	1807.840749	7423.909164	1792.757354	6767.019717	6251.955503	4310.638383	2514.895214	16963.77792	11211.9736	1597.672549	6723.048182	6115.352061	5536.179866	1662.847448
PI(18:0/18:3)	0	0	0	5465.174162	0	0	0	0	0	0	0	0	0	0	0	0	0	0	0	0	0	0	0	0	1569.085415	1498.58764	1492.51579	1006.094856	0	1543.565718	1501.129531
PI(18:0/20:0)	53499.00871	592995.4211	440899.9589	403064.6942	323932.5383	252175.5989	498492.7178	200658.7853	199090.636	277635.6401	694860.414	309742.7697	188205.3846	223559.9906	465062.6529	79087.79219	403865.7419	269051.6067	279665.5036	779340.118	227583.1796	440545.8388	221128.0966	74936.40757	397055.4747	207241.9065	183190.7474	453015.6392	370202.3349	53646.98035	334152.5363
PI(18:0/20:1)	0	0	0	0	0	0	0	0	0	0	0	0	0	0	0	0	0	0	908.2945849	719.6683653	970.0484889	0	1400.614104	947.8728942	0	0	0	0	0	0	0
PI(18:0/20:2)	0	3091.404868	0	2294.976343	1546.383654	0	0	0	2715.369592	0	0	958.9578802	0	0	0	0	2103.693042	0	1047.415966	0	0	1040.274198	1554.21767	0	0	1444.972839	0	0	2064.128676	0	0
PI(18:0/20:3)	3734.670183	9945.302992	5707.525311	10556.20011	7777.032222	3229.444861	6185.638946	4042.058606	6078.124985	3060.544346	0	0	2310.105615	2087.294839	3375.363339	2400.473547	5149.178516	2098.354462	2066.611169	2089.550967	10165.85135	3349.585552	18175.26411	7137.431219	7060.612352	3613.181068	978.8860869	3868.997273	4163.297295	5575.463092	0
PI(18:0/20:4)	21723.45288	23374.21928	38390.66195	128516.4078	15683.623	15470.37027	34276.99095	16608.61286	17374.46397	17451.73775	3753.213732	4571.646855	3910.765196	10989.34721	51084.04021	13415.40924	49544.11363	3188.207899	4771.966728	2705.504169	30480.96671	40783.18395	27990.988	58498.97206	149838.4402	66703.03992	1285.963036	12692.50312	4808.742719	1159.066762	9340.528556
PI(18:0/20:5)	0	0	207.0606905	0	0	0	0	0	0	0	212.1877311	0	0	0	0	0	0	0	0	433.9833919	0	0	0	237.5194369	0	0	0	0	212.4582963	0	388.4069186
PI(18:0/22:4)	0	0	1040.689837	1571.589703	1885.734607	1033.68426	1541.435701	0	0	2603.724683	0	0	0	0	0	0	0	0	708.2741838	688.0418848	2594.011361	0	1042.043678	1530.97796	951.6674194	2419.89698	0	0	0	0	1082.731825
PI(18:0/22:5)	0	2088.963929	943.6010799	2316.750876	1697.90431	2057.994786	2336.456087	0	1452.468635	0	0	0	996.6069255	0	927.9049683	0	925.1881578	1039.758952	0	926.8407231	942.247613	0	1042.885613	1541.412098	1027.519089	1462.098723	0	1583.707733	1167.091371	0	0
PI(18:0/22:6)	0	0	0	1660.625005	5158.038645	1577.747529	1719.466837	0	1023.766793	1800.395495	0	1039.288135	0	1573.991586	2453.455708	0	1408.58845	962.8732609	0	1036.412641	0	2739.773775	1046.934262	2569.818614	1172.881634	0	1085.236592	1543.763545	0	0	0
PI(18:1/16:1)	0	2071.592442	1393.037443	0	2612.261455	1419.014866	1437.057521	948.0309591	3159.507687	1036.200986	1519.825492	1048.582761	0	0	2092.127201	0	1328.560318	1039.26893	1438.105621	1386.662827	1205.064759	634.7627833	0	1043.156062	0	2770.429155	0	1315.616705	0	0	0
PI(18:1/18:1)	4141.846661	1359.102128	3965.469269	4202.086952	4219.828796	2984.669358	2061.804315	3940.480808	3842.511478	0	1928.260003	0	0	2088.606186	2429.183016	1583.825095	10617.60297	0	1214.086571	1565.335181	2384.237169	2151.152379	3497.639032	6844.975693	4862.740039	3727.060685	0	931.1473478	1423.297899	0	976.5033198
PI(18:1/18:2)	3581.652648	3964.406881	7138.85008	5219.871738	5399.674936	5283.033992	1566.99507	2450.177748	2224.768091	3229.769702	0	3087.238033	5033.761483	3878.502212	2691.314982	2964.434942	6460.49505	1262.273906	3317.592009	3916.179161	2499.447011	2102.872132	3044.955385	3553.923469	2862.935854	3432.554453	1428.155329	3654.871762	946.527336	3494.756623	1933.524207
PI(18:1/18:3)	0	0	0	0	0	0	290.999916	0	0	0	624.6085885	0	0	541.8784169	0	0	0	246.9332994	0	0	0	0	0	0	249.7211413	0	0	250.431482	0	0	0
PI(18:1/20:1)	222.5683767	238.5884562	0	0	0	0	0	0	248.775136	0	0	0	181.255016	0	0	0	0	0	405.923723	667.729632	0	0	0	0	0	0	0	0	0	0	0
PI(18:1/20:2)	0	0	0	370.00559	0	0	0	0	0	260.2297576	0	0	0	481.4923083	354.9723075	252.2097716	317.8515589	0	386.8277534	0	938.0080425	0	498.1501836	0	0	324.6667058	1048.098349	541.8682836	0	0	0
PI(18:1/20:3)	2466.741076	6920.958178	4056.328916	3071.986395	3539.472627	2964.448195	1965.969294	2999.630608	2370.421048	4361.685197	3015.320989	3932.154892	2749.342989	1986.449616	1762.120825	660.8408143	2404.77134	4272.127394	3338.678833	1713.205821	4508.497381	4061.293435	2247.632504	3116.653362	3812.452011	3862.565592	1416.739578	2392.341879	5675.841327	1339.487333	1473.613352
PI(18:1/20:4)	2136.056545	7312.127281	3501.865978	7853.821504	7691.890859	2037.972099	4721.062081	3416.966993	1828.165441	5404.144946	4450.312357	3052.061115	3048.480003	2814.164728	3138.564264	1973.718361	4324.735431	1357.446012	7391.374683	2262.215261	7832.808904	3265.374597	3216.336273	3795.935019	6876.922264	7350.465851	2226.722642	1504.757428	3250.700002	1689.022679	3595.811859
PI(18:1/20:5)	0	248.3857479	163.9156698	0	0	285.8317701	179.7975342	0	0	0	170.6253858	496.2914667	217.4528703	282.8298223	270.5625748	0	396.0304267	0	249.0184282	260.0429885	0	0	0	214.2669964	0	204.5564603	238.8636073	0	0	163.5889881	0
PI(18:1/22:4)	937.5699638	1098.721763	2598.017605	1512.494486	0	1033.844105	1028.823664	0	942.4131616	0	587.0492111	0	1560.350096	2453.668683	2026.11079	0	1041.644375	0	0	0	0	1013.505005	0	0	0	1925.149539	0	0	0	0	0
PI(18:1/22:5)	0	2338.137804	1174.249195	947.0275232	821.7038699	1356.801272	1554.485353	350.5963066	363.5255155	875.5708474	478.7625634	616.4428284	852.102675	757.4811962	1317.106394	401.7096573	659.8671044	904.8672523	1401.275533	1332.487632	720.8391957	1816.992771	999.3191677	0	2179.040066	1941.975462	0	1616.00628	1141.70462	0	667.2544818
PI(18:1/22:6)	0	1641.715704	1666.012469	821.0641027	0	672.0819839	3381.941321	0	1380.735487	1366.211001	1721.624915	2603.865038	1716.265133	0	1769.211532	0	1246.733759	958.5099834	1938.63458	2238.127235	2298.058199	2551.384519	1564.964223	1940.415569	2569.847334	1160.852675	0	2233.485597	2366.057543	553.3087081	576.6390599
PI(18:2/16:1)	44185.65819	280733.055	228126.9351	97023.56485	221823.2592	296886.4778	205505.2467	37572.33642	78108.15622	118854.0577	213906.2663	242163.8316	115863.9255	115309.5251	167345.5779	64585.56223	275356.0057	155990.2024	291509.4226	228665.5524	342750.9736	243871.9211	132671.8839	122524.6266	269751.6891	222980.9022	228639.9138	203668.7331	111565.6551	39999.1233	167599.1266
PI(18:2/18:2)	2957.287798	3382.630951	5327.32243	3667.685887	8025.404724	8947.890884	7654.996063	1534.050839	3302.16431	953.0265032	9162.543775	15520.76525	4288.321833	2456.561699	2534.115345	5083.521595	14895.71417	3913.621615	3776.408565	3623.64767	7989.856538	4458.287913	8282.840378	1308.18415	10229.12581	16505.56007	909.4176264	3682.442333	3498.642307	481.9841758	6400.761101
PI(18:2/18:3)	0	0	0	0	0	0	170.0723344	0	0	0	437.2689381	228.3718549	192.4777459	0	0	0	491.4312271	0	0	317.6511981	0	367.0516069	438.9420829	0	0	0	0	0	0	0	246.6504313
PI(18:2/20:1)	0	0	0	0	283.2253159	0	0	422.9976584	0	0	0	180.4904775	0	0	0	0	407.139355	0	0	0	0	0	205.2424932	0	195.2418717	0	766.8594477	170.4257357	0	0	296.7571697
PI(18:2/20:2)	0	311.1328128	0	0	289.8558566	0	253.2587453	161.3880538	0	246.7497428	0	205.4578023	158.4649504	0	351.223521	0	0	0	0	284.82679	0	190.5281823	0	0	0	0	0	229.927381	0	0	217.3692891
PI(18:2/20:3)	0	2463.585503	0	2288.014537	0	1282.542452	2226.365838	0	1039.051382	1406.930981	5384.751634	1862.505934	1525.676878	1809.527	1045.556065	2310.087561	1903.868112	0	491.6725713	1166.690076	654.5399221	826.7985331	1150.891178	1123.664766	1658.293268	0	2141.350627	0	2352.075522	715.8022458	1837.605665
PI(18:2/20:4)	4146.757155	15952.23307	27535.21072	13124.49486	6020.806968	26693.08938	22435.42829	4774.191441	3353.055884	11602.82568	11080.54811	17539.19528	10365.01737	15331.34062	23958.18753	3816.977472	23107.87819	9122.370415	13058.41583	19637.88734	80287.83751	21514.03033	9590.093181	8626.351012	13763.83996	25554.73044	9069.141778	17652.09083	4868.189644	4467.743686	8074.348134
PI(18:2/20:5)	1691.537104	0	0	0	0	0	0	0	0	0	1736.047726	0	0	0	0	0	0	564.8212611	241.1134527	748.8480165	0	0	0	0	0	0	0	0	0	502.2659491	605.68102
PI(18:2/22:4)	0	0	0	0	572.9951506	0	0	0	0	0	1745.005886	1062.038583	0	0	0	0	0	2340.188638	1400.671463	1126.151231	578.5082317	579.5492095	0	0	0	0	0	564.2945616	0	0	587.4664344
PI(18:2/22:5)	0	0	439.73228	2772.171818	393.1371146	1609.731393	1048.066545	841.0842926	762.176836	0	2578.709943	1776.375298	716.2411033	610.9129581	504.063631	969.6447071	0	0	471.6565087	387.9199633	0	668.4527612	589.4625035	0	1309.171895	841.6138658	1243.110537	804.7438977	482.9027538	0	2308.57286
PI(18:2/22:6)	0	537.4389294	1501.89351	1366.046934	835.1680666	2072.092979	1364.475446	0	848.7998394	2198.308335	2616.087883	1188.456226	0	1420.044497	1741.112635	0	2697.007649	2991.75978	1385.505628	0	4392.211138	1604.228999	2320.805991	0	1099.763059	746.8822789	0	860.0516818	0	827.8553991	869.587517
PI(20:0/16:1)	0	3910.924775	4020.310468	4109.961203	8065.910982	4996.101466	5007.290053	1861.663699	3550.997366	1953.535137	3402.472515	3729.641861	3077.392176	1341.473722	6201.525744	827.4199333	4172.901462	3683.928902	3161.842589	6084.819997	3275.569954	3577.031561	3237.266768	1401.932153	5470.416863	629.6605873	2064.461436	2849.252077	6167.860047	559.423404	1764.379525
PI(20:0/18:1)	2601.574589	62287.4666	57706.24756	35643.95009	53692.06571	23671.1372	35215.92036	14799.17635	22907.54624	37609.22312	37690.88718	33389.3603	34178.27638	17035.20382	87026.55555	5229.470143	59146.27755	25240.89531	41699.86081	81496.52143	15955.15601	43261.58608	28466.31202	7470.085098	47041.0017	24830.84841	32277.51204	63093.25907	23765.6167	8642.750216	30960.05476
PI(20:0/18:2)	1325.58801	3921.533609	8367.291097	9098.087568	26840.55549	9815.645267	5472.125219	4607.822064	6691.406243	14329.87373	7650.546363	9580.197596	7948.39976	5262.976297	11585.44349	1372.476392	17284.07472	12737.22523	17176.47727	19872.58037	6889.702528	10524.26317	6943.650947	5046.03844	12607.37995	7980.784595	6556.734541	5083.855175	3618.924824	1956.88171	7457.963569
PI(20:0/18:3)	0	537.4411849	0	0	859.4318961	0	0	0	583.6412066	0	602.4268461	0	0	0	0	0	0	1159.921484	0	0	858.8060783	0	0	0	0	0	0	0	0	586.9678414	0
PI(20:0/20:1)	0	2168.833998	5091.211006	2044.165221	2230.713861	0	815.5357023	2872.220439	0	4412.333668	3479.33461	2021.161574	911.0223697	926.5344389	6716.046789	0	3543.832767	0	2760.859686	5324.148232	0	2474.234926	0	0	4398.450248	0	0	2286.438843	2432.606628	0	2896.055671
PI(20:0/20:2)	0	2131.357312	2772.067763	0	1918.075434	942.5465544	0	0	0	983.7172516	3185.586861	864.6774154	860.4722509	0	4650.941016	568.1778652	3991.361887	1194.473189	4170.355937	1949.426159	1134.135644	0	961.2998944	917.9516131	829.5748794	2399.219887	2317.4348	2504.939582	0	0	4049.085405
PI(20:0/20:3)	0	1347.853851	1182.827612	1466.249541	1412.983243	1620.183423	0	0	1347.055753	1895.445573	1638.96399	4535.738284	0	1778.578524	1211.594435	0	1501.622332	1580.59847	1399.642787	2582.947033	1985.461043	2143.302897	1422.068149	899.4538008	1947.992488	0	1798.912183	1157.061932	1842.023388	1236.176647	4593.518341
PI(20:0/20:4)	1133.973434	5689.01254	2505.442677	6074.853972	10552.91268	5890.939615	6938.388377	1995.11057	1530.95387	2014.969832	6683.6761	2702.603503	1868.676136	1338.772146	5312.265035	0	3116.952673	3812.356202	7523.500146	5165.47367	5858.068392	3833.386769	1853.096401	0	3509.620092	2778.807383	2018.5491	3170.886398	1513.321583	736.1361232	1932.299402
PI(20:0/20:5)	0	0	0	593.6919855	0	551.0482005	0	0	0	0	605.1754861	0	0	0	0	636.2985428	0	0	0	874.7285452	0	0	0	0	620.0723859	0	0	961.1471876	0	0	0
PI(20:0/22:5)	0	0	0	815.2676385	835.0053244	0	0	0	0	0	253.0307547	0	0	553.9713486	0	849.6151282	537.6583104	0	1187.397496	0	0	1059.60079	0	0	0	0	0	1111.318619	0	0	606.1322853
PI(20:0/22:6)	0	0	1518.227278	1015.385415	969.8042443	0	0	0	0	1622.097537	625.5689602	606.7020704	0	0	0	0	0	0	619.4468006	0	0	0	0	0	0	0	0	0	0	0	636.7204093
PS(14:0/14:0)	0	0	0	0	0	0	578.6794814	0	0	0	892.8829169	1217.073988	0	586.9614775	574.5629783	0	0	583.5048672	0	0	0	0	0	0	0	0	0	0	0	0	0
PS(14:0/18:1)	0	976.4860094	0	878.9481082	0	164.5208407	769.6452381	548.3115109	0	0	5146.862628	5146.615034	208.7712672	0	0	0	0	0	0	994.5417584	199.3004829	0	0	815.4265725	0	0	0	542.6457611	0	409.7999765	2716.548046
PS(14:0/18:2)	0	4881.439834	1418.826811	2065.721847	1667.069347	8067.010728	1705.860971	1416.62341	882.7594609	5943.02404	5146.845706	8174.026862	3230.590461	1572.792867	2621.319982	0	4080.872782	3782.001371	2643.130646	2655.206308	4607.563061	1418.182752	1689.709494	2009.168708	2356.973821	6253.97426	3028.47318	1765.705735	0	0	2395.49627
PS(14:0/18:3)	0	0	0	0	836.0453519	0	0	0	0	0	0	0	0	0	0	0	0	866.9579385	0	0	0	0	0	0	0	0	0	0	0	0	0
PS(14:0/20:1)	0	0	0	0	0	0	0	0	0	0	0	0	0	0	0	0	0	0	0	0	0	0	0	0	0	1003.492116	0	0	0	0	0
PS(14:0/20:2)	0	0	0	0	0	0	0	0	0	0	0	293.358598	0	575.9514028	0	0	0	1166.410022	0	0	0	0	0	0	0	573.7359205	582.7655875	0	0	0	0
PS(14:0/20:3)	0	0	2067.864259	0	0	0	2061.82447	1543.492435	0	0	1177.438353	2626.471871	0	0	0	0	1165.791442	1535.205585	1491.785685	0	0	0	0	1088.265663	0	0	1564.083202	0	0	0	0
PS(14:0/20:4)	1039.031949	3014.109492	12628.94898	6109.941987	15501.66882	7964.168576	10769.03895	6707.32761	1402.592598	3949.837741	9384.755843	3655.970337	4375.999717	6377.09715	3210.678096	3121.794523	2065.574279	2526.671542	5886.192851	9851.910495	10194.75086	7177.986507	4124.544636	1553.143513	6088.909093	8975.572661	6502.305017	5926.825989	5959.61327	5042.904546	9213.427415
PS(14:0/20:5)	0	0	1566.865889	0	0	0	0	0	0	0	1051.398181	0	0	0	0	468.5736833	1049.058002	1018.09142	0	1003.762397	994.4016946	0	0	0	1041.353241	0	0	1511.884708	0	0	0
PS(14:0/22:4)	0	1516.054761	3616.168059	0	0	1732.958067	1031.088735	1514.723734	0	1030.930297	0	2611.777345	987.6250204	3998.017777	1537.418545	0	0	1544.574298	2523.404338	0	2949.327705	4116.352562	0	1526.441955	1999.828651	3592.178516	4122.479083	2570.730502	0	0	2035.02575
PS(14:0/22:5)	0	156.6676768	438.5633705	245.4972448	142.6012755	0	0	0	0	285.978137	2989.751035	1967.896422	233.568699	246.7754179	267.2966977	0	0	252.9517307	310.8595979	0	0	254.1242976	0	0	140.2415273	0	1011.960262	0	0	0	2395.679973
PS(14:0/22:6)	0	0	2956.671979	0	0	1177.065857	2442.668499	1453.547929	1198.432245	962.6531191	0	0	0	0	0	0	1157.916402	0	0	0	1217.747555	971.5639714	0	0	0	0	0	2547.954753	0	0	1096.322549
PS(16:0/14:0)	0	0	0	0	0	0	0	0	0	0	0	1141.204626	0	586.2767628	0	0	0	0	588.1854713	0	0	0	0	0	0	0	574.5798387	0	0	0	593.3589157
PS(16:0/16:0)	579.7197384	1005.11613	0	1125.338572	518.791015	0	0	547.9971032	0	841.882711	1783.79117	3760.128547	0	587.6090764	1046.777201	0	741.3858397	0	0	2316.870578	771.8569881	0	715.9422397	0	0	550.8013452	608.4916717	745.9040522	0	580.7354659	600.9375004
PS(16:0/16:1)	0	591.7169444	0	1182.546677	0	1161.58999	0	0	0	0	1696.077851	0	0	0	574.5629783	0	0	622.3232058	0	0	589.1506211	0	0	890.1489488	0	0	0	587.0622166	0	0	599.0725108
PS(16:0/18:0)	6782.376178	14719.56317	10823.04487	4761.884841	35318.974	27780.3743	43700.37018	4682.97894	14891.65662	12462.31185	11247.21207	8263.040372	5878.274861	3363.702119	9685.738748	8884.56319	31278.02712	11901.56892	10399.70534	12483.21156	21012.23043	13605.55148	17418.71882	14073.11469	10582.71716	6252.090832	13056.32197	11451.06853	7936.713982	4462.770285	15881.23116
PS(16:0/18:1)	2061.662769	3397.214045	2263.426433	1397.242415	2692.458028	1897.008373	5678.915746	5012.709897	1543.645625	1755.412495	1728.30802	2374.877215	3525.761396	4215.459265	5818.53065	1533.933016	2474.902529	5645.145824	0	0	2606.553581	7063.33208	1356.420282	1044.56526	3532.34417	4832.542191	808.8051999	1478.457993	2508.20428	5003.478956	2324.516743
PS(16:0/18:2)	1438.737587	2797.693497	1395.4065	1564.428288	2735.738434	5902.735085	1488.688286	1543.898043	0	1034.39581	2054.82379	7705.526858	1003.17301	1567.103178	3276.469555	2016.530274	3303.126937	2374.37802	6341.181752	3544.423122	5014.831157	1425.364808	1055.771311	1264.3029	4790.420875	2073.948887	2603.017952	1794.930197	2988.402889	2370.949611	3135.176395
PS(16:0/18:3)	0	879.5361796	0	0	533.2180762	0	0	0	0	0	0	1189.228653	0	0	0	0	0	0	0	0	0	0	0	0	0	0	0	0	0	0	0
PS(16:0/20:1)	0	0	1457.985789	0	916.2792384	1073.627797	969.9732468	0	0	1441.066299	0	484.1764475	0	0	0	0	0	0	0	1540.757981	1017.676336	835.6389148	0	0	0	0	1045.699484	1498.770002	0	0	0
PS(16:0/20:2)	0	0	0	0	1293.668029	0	0	962.4366231	0	0	0	0	0	0	0	0	0	0	0	0	0	0	0	1162.187613	0	0	2116.393097	0	0	0	0
PS(16:0/20:3)	0	0	1970.565296	1043.816503	942.920893	1041.584215	1034.726234	0	0	0	0	1016.154623	1568.504559	2001.116335	0	0	2075.76566	0	931.7917885	0	801.7312195	1546.218203	1565.013424	1452.681066	0	0	0	0	0	0	0
PS(16:0/20:4)	1558.140611	9367.539859	7835.263791	3934.963685	11717.03708	12188.42176	12285.40061	2670.573654	2991.665785	1120.600298	14311.94844	9586.508323	3781.030613	6875.038006	11886.22002	3611.175084	6830.582107	5565.059142	7525.458029	6727.994632	10001.64941	12969.32688	6626.055362	1531.580521	7020.667865	1744.881217	3912.230577	7860.168923	3980.391152	5010.578633	5247.351619
PS(16:0/20:5)	1047.339299	0	1437.155094	2089.000888	0	1564.037974	1534.378064	0	0	0	1591.136702	1046.050829	0	1532.359841	2597.89378	0	1194.149702	993.8837597	1317.560775	0	1049.547316	1941.194769	2028.492316	0	2061.953256	0	1046.171042	1497.249419	1003.07574	0	0
PS(16:0/22:4)	0	0	0	822.0873318	1099.086702	982.0429537	2969.155699	1020.585033	0	0	4169.136619	3639.42667	0	0	0	0	0	0	0	0	0	902.8635991	0	1009.313844	1195.036584	0	2220.99848	1126.208865	815.4605026	0	0
PS(16:0/22:5)	1007.380365	1452.945296	3117.543195	832.1528579	2598.282674	2512.13396	5205.818143	1512.190213	0	0	3632.013607	2574.939188	0	1529.183785	1515.668562	0	986.8857132	2583.81791	2062.770317	1546.375361	0	1525.905244	1602.895166	1016.896346	2082.956139	2078.732817	4167.800049	0	0	1931.666042	2454.162804
PS(16:0/22:6)	0	0	0	0	0	0	0	0	0	0	1543.196747	2610.977602	0	0	0	0	1007.767752	0	0	0	0	0	0	0	1270.570448	0	1553.701872	1017.029399	1019.929237	0	1042.518428
PS(18:0/14:0)	0	2016.298567	0	3027.890146	0	2525.510723	2556.519629	0	1511.257537	2575.475382	0	0	0	0	0	0	2169.909643	1023.982125	0	3485.229465	0	0	0	0	3769.073521	987.5765758	0	0	979.050645	0	1045.362217
PS(18:0/16:1)	2610.444363	4558.576659	8248.045968	5228.339718	5229.238929	2525.7086	7741.663924	2566.412528	3544.031223	0	3591.579741	0	1524.981875	0	3336.376463	1539.491393	2068.505884	3116.679952	1006.033554	5014.732949	2084.036618	2582.240188	2543.534615	1035.55881	2206.272607	1946.602234	1045.212132	2131.475254	4926.81163	0	2726.304499
PS(18:0/18:0)	84376.98555	668098.6556	804198.3252	437857.4507	443101.2045	264203.1505	1001730.712	478780.3656	477882.2316	287910.6513	619446.2363	205354.6827	363073.6711	269360.0437	605598.9735	178080.1674	194607.9247	346427.5725	425314.816	566505.0922	191407.383	842107.4247	270668.9592	63972.04408	805046.3289	233884.6811	276165.3107	530993.509	933936.7201	205248.8412	430380.8963
PS(18:0/18:1)	10849.60756	71454.82092	104270.7971	55967.12666	67572.7356	35477.64356	115879.5187	65899.4618	50929.63897	45732.04498	45411.54087	17468.48176	54855.73729	40732.46144	134998.0892	35104.29859	30664.09431	44962.1713	63994.18195	73629.54577	22787.95354	101480.626	45977.79848	10419.08495	92471.23216	37138.76941	42433.83616	78160.00415	83322.20293	37014.43377	34371.77495
PS(18:0/18:2)	2584.465696	9325.619046	19003.37705	11869.57885	20824.79047	6877.466663	14494.39555	2585.614305	7292.338453	9844.829819	10758.59297	8410.249451	8169.800938	8907.277513	15028.39651	8253.107658	11352.23098	18123.72325	8758.064659	12529.23051	15177.34635	10113.08812	14904.08741	2472.009217	19218.01239	18832.88846	11777.7491	7076.720852	9595.450444	1518.536219	11520.71513
PS(18:0/18:3)	1117.925145	1365.188302	1326.007971	1498.650744	308.9910674	2062.041274	1827.247831	835.3379101	2401.02422	1619.576754	653.3801851	2372.130284	1603.582962	1600.990736	2090.675918	1135.426157	2300.29591	2177.89071	3471.984988	2319.451144	1823.830166	1091.570915	1184.819471	1916.669197	1223.235546	1796.971573	892.78552	1453.944305	1094.303411	911.5607248	1369.758907
PS(18:0/20:0)	7413.352365	47439.52149	33244.81466	93828.97534	22261.5238	61711.2088	40000.18334	25474.13248	14761.99488	22375.11057	61542.06533	28475.12683	18065.39738	17917.62429	46064.58767	11753.69472	34915.02303	50230.01904	28914.52346	127723.634	19826.54456	45646.01208	17980.71748	15957.2388	35189.8662	77701.54705	12829.08389	18050.89356	20231.59172	8695.202377	28398.99446
PS(18:0/20:1)	1039.989034	2106.105402	3499.613682	1017.393448	3649.595112	2084.230788	3115.505744	2080.161115	2084.922824	0	2092.840407	2093.189397	0	2562.618432	7817.148923	0	1551.770053	0	2191.434555	0	2606.214435	7271.08743	3130.165398	0	2083.852223	1038.896588	5751.381246	1042.075758	2075.012876	2594.037293	1051.699096
PS(18:0/20:2)	0	1541.110492	1570.323962	2074.17077	3623.908676	0	1925.491945	0	2085.632337	0	475.2731435	2087.464963	1033.230225	5173.687429	2082.915003	0	0	0	2060.146942	2577.347725	0	1559.340174	0	0	3588.971473	2028.66809	2093.036281	1545.504558	0	0	0
PS(18:0/20:3)	172607.6294	811725.0292	451222.3329	387790.8054	313133.5409	516274.116	459391.7637	207624.9357	383868.5168	268634.2577	537797.1782	549292.9163	242782.4124	531555.2108	539713.8866	379148.9652	377336.2961	249907.3647	255774.5917	194450.8241	448560.6903	242493.9183	264605.2569	311669.1291	325627.6872	233010.4117	256775.6436	330341.514	380192.7839	227110.4072	302402.1962
PS(18:0/20:4)	5742.477713	11369.28868	25459.81523	11962.02994	31061.59511	9736.48367	19778.3145	5791.254607	10425.02368	4702.01474	10872.70283	23026.8014	2608.121131	10429.63458	17547.30065	3631.411532	11787.67203	18666.40144	17912.34572	12232.74566	14128.98897	12967.71848	9900.707215	5286.106969	15100.98052	12857.00475	13357.85621	10367.68177	7492.96951	9915.608695	9598.192343
PS(18:0/20:5)	0	782.1680973	2590.24586	1618.034704	1583.495328	1551.260009	0	1232.245637	1880.033073	914.4456919	5096.186956	2302.378929	2321.41537	1060.820038	1206.282968	0	791.9881982	1650.861887	1055.867574	888.7488737	1715.048622	3204.940749	1019.808331	0	949.6240873	1191.07966	2069.833376	2433.883252	819.1604725	0	1007.816814
PS(18:0/22:4)	2104.344217	2284.803232	1299.134554	2290.235208	1108.69453	2432.591605	3340.964238	1002.880991	2491.979117	1196.059842	2022.03633	1272.116993	1943.306961	2348.519383	3907.06004	1870.015588	1893.914466	1369.324378	2828.913265	1543.436707	2539.941984	1636.517329	1517.255031	1661.981045	2455.776345	2097.33953	864.4977416	1260.298258	2407.547939	2587.192812	1472.276963
PS(18:0/22:5)	18990.5972	62776.7397	124658.2239	98741.05929	40658.91951	62078.75916	41346.00473	27818.6952	85834.53941	35053.27826	39999.7639	36233.24178	24567.7953	51605.73166	41313.86237	53658.89757	28732.48998	48042.47997	43877.78915	40054.12933	66158.1466	37831.61105	26268.9739	22753.11503	49873.68559	34339.90257	41050.08187	19962.01708	26453.91269	37872.26724	31128.22168
PS(18:0/22:6)	0	2619.258835	0	0	988.710589	0	3131.824818	1040.836903	0	0	2111.791696	957.1926231	0	0	1045.908765	1033.731024	2101.879497	1031.500087	1024.009221	2076.377105	2005.25795	4222.601862	3152.709463	0	2958.003912	1904.020019	1054.541499	2610.144956	0	0	0
PS(18:1/16:1)	4280.78159	7169.248854	10455.56496	7940.937986	11085.39611	3163.680646	11591.84474	3359.043823	4470.167976	3639.108014	10220.65262	8353.824374	2198.845855	2882.197397	4789.232785	1030.50224	6249.617667	4290.825362	11046.1825	7527.1346	12493.46387	9499.728811	4801.191249	3594.327029	3827.399291	12324.72377	3167.488338	8515.404551	3846.062418	4905.843902	4266.895428
PS(18:1/18:1)	2579.408701	5102.848765	7100.262354	2797.8284	5375.220356	10193.41985	2095.301315	1541.261637	1046.709499	3428.496264	2346.877829	8648.252573	943.9275117	2516.990204	1676.445468	0	2556.292621	3359.712408	1330.737997	7035.897754	6350.844897	6754.341045	5014.405519	6198.994224	8413.361484	0	6581.921922	1397.356145	0	1374.557927	3057.455717
PS(18:1/18:2)	7210.383852	7898.745368	17565.72932	9456.839591	10636.23691	16863.02036	9496.079624	2499.894078	1876.227203	7416.119605	15632.32372	37420.45339	5230.088077	1476.616008	11768.84737	5351.591604	21114.6144	18690.29336	15948.61075	6732.158514	30303.93819	12810.9707	17799.24891	6139.760641	17808.42155	21427.13308	7067.120327	5841.547531	4179.400542	2021.70433	3872.188995
PS(18:1/18:3)	0	0	0	0	0	0	0	0	0	0	670.0944169	0	0	0	0	0	890.9883126	576.3199563	0	0	0	0	0	0	0	567.0857883	0	0	0	0	0
PS(18:1/20:1)	0	0	0	0	0	0	1513.168341	0	0	0	0	0	0	0	0	0	0	0	0	0	0	1032.848319	0	0	1026.311677	0	0	1045.455056	0	1556.296316	0
PS(18:1/20:2)	0	0	0	1554.15148	0	0	1550.775882	0	0	0	0	0	0	0	0	0	1563.649022	0	0	1014.235398	0	0	0	1555.551047	0	0	0	0	0	0	1093.459137
PS(18:1/20:3)	1539.112689	2457.705512	6004.542412	0	2425.842812	3071.879989	2989.447363	0	0	2064.926197	5032.022627	1803.592791	0	1272.059063	4442.389329	1041.049782	2804.382135	3246.628913	6088.621071	1479.0135	1859.874798	1555.970053	1995.60181	0	2075.15415	6253.448723	1226.989587	1390.359966	1546.849012	0	1956.526063
PS(18:1/20:4)	5020.654107	53369.36034	38273.31176	29554.94807	69997.59985	62268.13403	76347.94054	12789.93048	7925.632187	9865.696225	73384.73223	48350.84011	15319.42725	21854.38122	50934.17085	13089.0367	46739.57582	42298.38946	52916.57056	23375.38324	64822.6038	35520.25897	22273.89229	11924.62142	53812.80119	60782.13811	27072.24932	27241.24464	9876.515076	11625.10602	39019.96238
PS(18:1/20:5)	1041.119995	4170.56574	1679.491669	1050.568929	0	3425.466376	1433.726811	0	1041.347904	1021.757998	3453.003173	0	0	0	3126.797311	1560.794253	3125.645552	0	6487.240948	3643.61864	3489.791523	0	989.5957964	0	1563.947926	2085.160137	3668.914091	0	1005.892811	0	3117.903183
PS(18:1/22:4)	0	0	0	0	0	985.6481956	1394.707286	3031.106466	0	0	5023.949589	8823.20078	0	0	0	0	0	454.4681147	3946.614402	0	1174.488678	0	0	0	0	8471.516435	3678.264676	2754.848769	0	965.3654594	3247.579722
PS(18:1/22:5)	3121.901927	4979.653256	0	1828.448476	1384.926344	8861.21485	2727.805819	0	2818.594421	0	2834.848589	2603.52612	1429.362186	1553.85558	3675.439961	1564.530884	2608.992476	2541.426311	3583.46355	2660.7225	7300.601716	4224.513805	1496.900344	0	3634.916864	7390.557844	1900.025037	1560.374768	0	0	4139.357495
PS(18:1/22:6)	2602.03594	6397.864611	10360.77627	1044.831421	6342.23064	4480.506083	9944.370191	2617.426699	4383.701882	2612.843213	15264.69197	6296.148166	1458.845368	3092.053337	7747.516431	1043.663575	2773.975448	4161.622257	4499.357133	11992.53629	8074.844003	6631.392249	6969.628713	1569.768045	8396.830417	2220.302732	1058.848729	6239.689591	5716.491379	0	3150.988012
PS(18:2/16:1)	6207.367304	10885.38042	25813.43184	10509.90595	30740.785	19397.65387	14023.3906	4710.289095	10013.14828	14370.42695	21617.00901	24390.41189	13435.25377	7966.369051	17856.28506	7204.866407	17300.46119	20932.62746	41307.60978	14120.81177	24208.15581	13252.32709	11880.1068	8889.104456	21408.21944	22789.13714	11865.13608	18507.19732	8722.047992	6378.247529	14360.25587
PS(18:2/18:2)	15508.31145	12457.35513	17410.10674	35423.88037	37403.61405	28631.56158	29989.79183	4041.348198	5180.42357	20184.30632	47130.68526	46872.25911	12429.41441	9571.30825	29954.32575	11713.19377	53014.02859	14316.71647	37705.3034	21747.827	35750.10435	44394.48875	16197.47768	14664.61606	49955.07183	22176.45323	15318.47356	26284.58821	10809.64318	5194.036895	22176.67341
PS(18:2/18:3)	0	0	0	0	0	0	0	0	1715.168815	0	0	587.9239351	0	0	0	0	0	0	0	0	0	955.6830214	0	0	0	0	645.9594353	0	0	0	0
PS(18:2/20:1)	0	0	655.5891741	0	562.5052836	0	0	0	0	0	0	1045.602599	0	0	816.4126063	0	0	0	0	0	0	0	0	0	0	0	1611.997736	0	0	0	1575.428966
PS(18:2/20:2)	0	0	0	577.5550646	0	0	0	0	0	0	0	0	0	575.3345335	0	0	0	0	0	577.4404413	0	0	0	1173.117671	0	0	0	0	0	0	0
PS(18:2/20:3)	2774.84418	3301.882616	13066.68578	4453.562624	6632.425723	5539.823574	16739.13303	1460.244061	2086.192185	887.2319608	18410.86282	12112.35687	5751.188887	2100.018204	5777.68135	5734.681357	5612.100094	3449.814202	11462.16724	4141.266539	8745.835243	10160.27829	7258.726695	1088.822704	3127.295349	12640.21995	3276.596672	1902.350993	5204.439723	1769.879345	5996.780155
PS(18:2/20:4)	16833.44521	39535.77987	40520.01892	47861.69726	106437.5166	63066.66969	88857.29165	32049.52885	36503.235	14338.82028	46676.94778	56984.35596	34339.95603	39143.55423	72044.62083	5945.397975	62166.03839	19959.60217	31040.32167	29750.34266	88081.31516	42120.54916	25123.04089	10875.85703	77649.92613	88024.11033	32795.26394	24183.09022	29257.29576	28039.97072	44560.34221
PS(18:2/20:5)	1014.249259	3101.232464	1572.472917	1576.212181	2373.702353	2913.116687	4490.264038	1572.023938	2036.387527	2256.400459	0	2125.770875	0	1040.765833	0	0	1025.302412	0	1577.060088	1493.844702	2084.197091	0	1540.103293	1416.258353	2057.642555	942.8594404	0	0	0	1048.886066	0
PS(18:2/22:4)	1023.316632	1842.349707	4187.507964	5329.844367	8023.300818	7989.448704	3741.103482	4542.199873	1540.774884	1039.40577	6571.211684	2692.811274	995.5500669	1788.389856	2611.955613	1001.324263	3708.815088	1534.818347	3985.212926	2223.135292	8904.794488	4249.036981	1016.562923	3538.18707	3870.889441	6911.273403	1429.284268	0	996.0001087	1032.326908	3130.248733
PS(18:2/22:5)	0	6465.073007	4733.967622	2892.263967	7172.475424	10159.1099	8162.910404	1385.973092	2977.97822	0	2874.563341	2125.75785	3987.911667	2435.510635	996.1612939	1000.250259	7675.680779	6426.394734	2268.979675	3988.959799	8645.963302	4179.609246	2312.084882	7140.387198	2802.195818	6142.369051	0	1949.060863	0	997.3988133	2290.127464
PS(18:2/22:6)	3146.868318	5077.60018	5379.705079	4539.876388	8838.155285	3545.478694	12767.29049	1801.098478	2375.61472	2779.161507	2155.032515	2474.91791	0	0	6770.77771	2439.905485	5411.472356	946.1830741	6725.068883	6977.77714	4846.842721	3991.818436	5573.048538	2553.575594	5491.010712	6850.815244	2490.469799	1517.316791	1681.045388	917.5537578	1680.71616
PS(20:0/16:1)	2009.841154	31518.09152	25952.29816	83906.21407	29014.03174	62697.10332	44027.41928	37399.94238	10932.62263	28345.2433	39635.37347	16703.86482	8510.849777	10487.80665	44917.85559	8338.385044	29288.59287	29271.27529	11218.87544	39045.4784	27869.22482	36083.89548	40252.67797	7010.421336	19178.48116	52308.40489	15949.91594	12956.29784	19449.94109	11703.51366	23860.46821
PS(20:0/18:1)	0	8693.434011	10188.09676	7940.634458	7577.693596	3231.667261	6032.386118	5093.740971	5029.957578	2287.691575	7914.50424	3712.587094	0	2001.189497	7270.174066	2230.499698	8018.874426	10296.58751	7483.293975	1241.22074	5596.560664	7223.152042	3035.881693	1262.010946	6383.377399	6654.954523	4825.468025	3003.023932	3002.793987	2000.562947	10793.26772
PS(20:0/18:2)	73514.80847	556075.096	356305.1443	303165.4023	350905.7644	349168.3861	495621.1377	175631.1754	143141.2919	281941.1979	378274.5545	446182.7183	293407.1789	208649.9268	665864.0538	175378.8355	453823.6808	202258.7954	383582.3325	369241.9258	339797.246	477906.0843	303727.6132	119974.9229	477184.9663	352929.7488	360562.6312	283475.5298	302591.8113	125220.4338	249074.7518
PS(20:0/18:3)	2293.117335	9394.738459	1133.240359	23176.09985	12161.85073	7454.51577	7487.256314	1886.698128	3147.757714	5459.331636	5782.891095	6719.228116	5307.59137	3489.105731	8426.497565	1455.158833	9993.487906	8833.85898	2290.287556	1901.144055	8169.334146	3967.230199	13199.57792	3452.704987	8502.08344	8420.458247	5453.44686	4096.121591	8210.903071	884.0257002	3381.742537
PS(20:0/20:1)	990.7422538	1192.151015	3390.005093	1715.843872	3468.020167	2213.750228	2253.708042	0	1143.599931	903.4163168	1628.497751	1195.381243	0	871.0707337	2821.666257	0	3572.951613	567.9236591	869.028824	1151.998541	1980.186671	2070.304125	975.0406391	834.4098489	1725.229247	1409.974549	1701.555754	2030.719978	1450.14175	2027.233194	905.2097633
PS(20:0/20:2)	562.8901414	12975.25943	5641.619361	11237.3926	8714.025129	10134.58468	8685.610749	4231.991259	2089.776194	5201.380532	9937.635971	11670.95953	4644.67014	5201.862173	8335.358361	6322.755016	14106.03145	7351.163689	10766.76862	12214.07433	8199.269239	6562.64479	8720.268651	4352.692135	5310.956705	13475.27152	4937.742981	8172.609486	10305.5602	2384.750673	12214.12468
PS(20:0/20:3)	7659.972355	65892.58078	32460.19037	66647.00172	13660.14214	54188.08995	66429.26342	27648.62384	10356.66021	31546.84259	55779.73965	44929.0038	24696.89117	8184.947853	70047.78004	7332.082314	30903.83883	18230.35306	36162.68618	48535.63993	35491.65211	35549.20667	19133.68069	15355.48459	25395.68435	70736.76756	10610.31075	27726.75862	37700.16575	8390.33865	17116.00624
PS(20:0/20:4)	20872.32766	109183.4533	103962.9982	125655.7371	109815.5479	147994.0705	172920.4795	65360.32596	37511.81325	50119.25882	121265.7829	107518.7214	68637.94153	46120.17991	176432.2854	29803.80465	97726.84521	51613.81726	103905.814	104173.8986	96024.98852	117895.7243	56449.31871	42801.94337	87092.04084	137500.6271	62978.50716	65176.61013	80478.31284	30563.79648	98351.32829
PS(20:0/20:5)	849.5847309	5212.131933	3509.17975	9034.659853	7324.859999	6517.956782	15198.63115	1778.032653	1700.110217	2599.552355	5168.605772	3554.642816	1944.792324	791.1601619	3038.99337	568.1675414	4913.629887	5356.449172	1741.63588	4959.21558	5786.425861	2326.484454	2447.168632	1834.733206	2722.868706	3416.582195	2995.413337	1445.64912	1737.734882	0	1167.883193
PS(20:0/22:4)	746.9164733	6042.441145	4867.654135	10789.77192	4136.466637	4782.717822	8121.38891	3089.812245	839.0997777	3909.848077	9362.531782	8646.988661	3208.920758	3682.406199	14472.68637	1133.725688	6769.629651	5533.210562	5234.927522	5926.554598	4906.063762	6168.47921	2989.583818	1260.307026	7084.831612	8392.980998	1731.159233	7498.82819	4007.643196	2370.927791	8179.483423
PS(20:0/22:5)	1436.321898	13591.45141	5729.890776	12220.94412	10478.41102	14246.59766	22382.73545	3312.091791	3505.388528	4379.808431	14367.37238	10532.55391	13311.68869	5482.576392	18966.0291	3345.712638	6393.725088	3799.699303	6296.687038	7430.382825	9079.313554	5378.337799	6229.808249	6139.716927	12562.31901	8247.290723	6508.387562	9400.360848	7718.671651	1456.940735	6311.659334
PS(20:0/22:6)	2761.627055	19639.3069	16713.30026	13676.49791	16309.02346	12558.88585	23030.72232	9662.597248	12713.14984	12524.91939	15622.13859	19755.26159	10511.00131	5316.408286	32147.4148	4162.132847	17133.88826	13478.52707	20288.44608	34462.28394	5990.46413	17179.52683	19812.4996	6023.415816	21074.96004	8421.569609	9549.039812	13060.41882	15198.11329	2521.187489	9560.495488
27 OH cholesterol	0	0	2.845534217	2.067631597	0	0	4.015261692	0	0	0	0	0	0	0	0	0	0	0	0	0	2.007991342	0	0	0	0	0	0	0	0	0	0
Cholesterol	9926.424759	9935.612682	9912.830105	9941.492445	4550.736386	9958.708882	9969.170735	9953.676584	9929.715147	9932.814092	9976.708614	9962.188521	9917.180088	9959.751014	9942.105868	9937.881738	9941.290486	9941.500769	9921.637082	9939.072674	9950.792732	9964.465748	9944.822447	9925.038258	9962.225893	9925.802917	9939.284482	9939.472674	9958.619434	9920.224515	9955.838298
MAG 16:0	3.333590726	0	0	0	0	2.036087747	0	0	0	0	0	0	0	0	0	0	0	0	0	0	0	0	2.279083136	0	0	0	0	0	0	0	0
MAG 16:1	15.97697254	10.24304748	10.79294171	11.58189557	590.25717	6.318811448	2.230985025	0	16.36172417	7.196905256	0	0	0	0	9.219568326	9.094084235	3.426516167	0	2.94694618	2.463016829	3.241014419	2.488248202	5.692078979	9.974847926	6.779218368	2.945046048	14.56919573	4.886537001	10.86211456	5.265735553	2.675750475
MAG 18:0	2.761396506	3.673807648	3.608052571	5.951983296	607.339003	9.370538556	2.426440651	7.210366558	0	3.248364867	0	1.630093725	3.5336874	0	3.407625476	0	2.797972541	9.527823908	4.538151516	2.888578994	1.571684559	6.512239111	6.858257711	8.875598445	2.043718254	1.522074142	0	13.02240278	2.211435636	13.360732	0
MAG 18:1	6.359279408	4.380067942	15.38413755	6.14429477	481.8601198	3.231451856	7.094935639	12.20800439	16.46137736	8.015503951	1.30536808	7.203876247	38.67023136	5.457039497	7.297475672	6.933128462	21.87397655	14.7654324	14.91639673	7.570340639	9.813369095	4.801401936	14.39252299	27.08606371	6.217168206	10.9720667	7.00900606	7.901455604	5.510602064	16.16122319	4.39885615
MAG 18:2	10.32151563	5.346369427	5.68392647	0	0	0	4.243198671	0	0	7.344717093	2.262967209	2.488652819	0	3.350235294	1.767872243	4.878342652	0	7.663218182	0	8.536153344	3.819303561	0.885804525	2.115190804	2.218458011	0	3.784689576	4.592619396	3.640324897	2.212657608	7.704000227	1.718403316
MAG 20:0	4.75621199	0	1.233173257	3.364616029	671.3278948	3.057311226	0.604006566	3.907421619	5.237726802	7.082427516	0.465133748	5.554992795	8.184137979	4.86034373	0	0	0	0	0	3.112184047	0	3.278698318	4.089406314	2.256221707	2.60704518	2.560408168	0	0	3.663983403	3.740228028	4.686447256
MAG 20:1	2.150340155	0	3.352164541	3.756732244	259.3913621	0	2.009021396	0	6.374429247	6.090211109	0	1.364593103	3.65668246	0	7.462493927	8.571906283	3.05379962	3.297246468	5.590001069	3.371425558	2.984775578	4.366895295	4.558184915	1.711484782	5.080210996	7.744838914	1.864069569	2.458638825	0	0	1.728050946
MAG 20:2	0	0	3.339806254	0	0	2.47099526	3.012011732	0	3.192079359	0	0	4.864821781	0	2.430940143	0	0	0	0	6.137098033	5.776952171	4.653813752	0	0	0	1.701346792	0	3.554073545	1.889233686	2.138892486	0	2.352112547
MAG 20:3	3.377858662	0	1.861273749	5.163419121	0	2.398391608	3.378028364	5.39912252	3.594290887	5.683365276	0.799332526	0	3.59627924	0	3.550039062	10.83955834	0	0	5.590771261	1.926635633	1.838001072	5.169213518	0	0	1.396927652	3.042680097	2.076566663	3.640195577	1.711118926	5.482803535	6.561561065
MAG 20:4	3.957994928	5.183770873	4.912489685	3.153871956	0	0	0	0	2.216954775	0	3.262642468	1.378534819	0	0	0	0	3.641301895	4.910825558	0	1.909502145	3.103874266	0	0	0	0	4.491361211	4.549145094	3.685995814	2.422643975	5.686879551	0
MAG 22:0	0	0	2.82084105	0	0	3.050779506	0	2.733057905	2.287457656	0	3.378356213	1.389522707	3.025697061	3.942806069	4.494019787	4.493144277	4.600628253	0	4.203046987	2.886610426	0	0	0	0	0	0	13.34266508	0	0	3.840161219	5.189775159
MAG 22:1	2.253386381	5.411848739	5.509685475	0	259.4093881	0	0	3.990338684	3.192052695	0	2.294317967	1.390835333	0	2.386227247	5.960641561	0	3.20452671	2.818179731	3.732642195	3.593885453	3.065535836	0	0	2.216267177	4.234206833	0	0	8.175819778	0	3.84476036	2.868575608
MAG 22:2	2.234723435	6.132905706	3.452857396	2.065127642	516.8805665	0	0	0	4.162627933	0	1.146792745	1.797187172	0	4.759748479	2.371937677	2.308795704	0	3.494991174	7.459757592	2.366598178	3.288946111	2.67862377	2.279082879	3.801729957	2.521204192	1.98526121	1.48130954	2.456996391	4.857289776	0	2.253072611
MAG 22:3	3.377092133	6.129844105	2.846126109	0	337.5924715	0	0	0	4.784855385	0	0.463311107	2.083744766	2.835347101	0	0	2.923825406	2.300423318	4.557696865	2.900222708	0	2.046465477	1.298400295	0	0	0	0	2.384441258	3.66257179	0	0	2.790679575
MAG 22:4	0	4.092414562	2.805976701	0	0	2.84234208	0	0	2.419277169	0	0.533719159	0	5.415695413	2.434478566	2.384100633	3.019315902	3.202177694	0	0	3.847223223	0	2.312317376	3.120340233	2.206939822	2.551211511	1.108859727	2.996594684	2.456316434	0	0	3.112873545
MAG 22:5	1.732541837	7.544287726	5.683387958	2.014056859	489.9706012	3.203336359	1.815375132	3.990996842	0	4.943848612	0.457282856	5.278791229	4.856989808	4.557305401	3.104751109	3.623451062	3.387950086	4.512446921	11.14023704	8.572634415	0	1.742409591	2.059375771	5.236555965	0	2.534802435	0	2.650837014	0	0	0
MAG 22:6	0	0	0	0	0	0	0	0	0	4.26121438	0	0	2.819798289	0	4.76932342	3.018957216	0	0	3.732711708	0	1.991943766	0	0	0	0	0	0	0	0	0	1.913383916
S-1-P	0	0	0	0	0	0	0	0	0	0	0	0	0.698641507	6.069861696	0	0	0	0	0	0	0	0	0	0	0	7.95268471	0	0	0.421082251	0.154714862	0
Sphingosine	10.98233683	6.248954178	11.03752006	13.24392577	1235.235037	3.311072716	0	6.884107353	0	13.31934996	6.922161576	1.385832897	5.52672425	0	2.10428312	2.413752571	7.220240926	2.951369712	5.474934535	2.105584507	5.780548801	0	7.734028811	9.377574832	2.641848638	23.55230962	2.295831602	0	5.368745641	14.53424645	1.912159653
